# Supplementary material for: Age-Related Differences in Affective Norms for Chinese Words (AANC)
Source: Front Psychol. 2021 Apr 15;12:585666. doi: 10.3389/fpsyg.2021.585666 (PMC8082186; doi:10.3389/fpsyg.2021.585666)
Supplement: Supplementary file 1 [file Table_1.XLSX]

## Sheet: 2061WordNorms
Word No.	Chinese word	English translation	All_Valence_Mean	All_Valence_SD	All_Arousal_Mean	All_Arousal_SD	All_Dominance_Mean	All_Dominance_SD	All_Familiarity_Mean	All_Familiarity_SD	Old_Valence_Mean	Old_Valence_SD	Old_Arousal_Mean	Old_Arousal_SD	Old_Dominance_Mean	Old_Dominance_SD	Old_Familiarity_Mean	Old_Familiarity_SD	Young_Valence_Mean	Young_Valence_SD	Young_Arousal_Mean	Young_Arousal_SD	Young_Dominance_Mean	Young_Dominance_SD	Young_Familiarity_Mean	Young_Familiarity_SD	ChineseWord	No._of_All_Participants/Valence and Arousal (VA)	No._of_Older_VA	No._of_Younger_VA	No._of_All_Participants/Dominance and Familiarity (DF)	No._of_Older_DF	No._of_Younger_DF	Word	Word_Frequency	Word_Complexity	1Character	1Char_Frequency	1Char_Stroke	2Character	2Char_Frequency	2Char_Stroke	3Character	3Char_Frequency	3Char_Stroke	4Character	4Char_Frequency	4Char_Stroke
1	阿谀逢迎	Curry favour with sb	2.37143	1.00247	6.61905	1.32564	5.10204	1.8056	7.10204	1.2289	2.34615	1.10053	6.59615	1.31745	5.12	1.78699	6.72	1.4	2.39623	0.905955	6.64151	1.34585	5.08333	1.86307	7.5	0.884652	阿谀逢迎	105	52	53	49	25	24	阿谀逢迎	99	34	阿	319.28	7	谀	1.2622	10	逢	34.2502	10	迎	192.135	7
2	阿谀奉承	Flattery	2.45192	1.01331	6.50962	1.2997	4.79592	2.15038	7.2449	1.29953	2.49057	1.12014	6.43396	1.43459	5.08333	2.20507	6.79167	1.25036	2.41176	0.898365	6.58824	1.15198	4.52	2.10396	7.68	1.21518	阿谀奉承	104	53	51	49	24	25	阿谀奉承	465	33	阿	319.28	7	谀	1.2622	10	奉	100.157	8	承	206.993	8
3	哀哀切切	Mournful	3.4375	1.1468	5.60417	1.45485	4.55102	1.60807	6.26531	1.72935	3.45833	1.28466	5.625	1.49819	4.83333	1.6854	6.41667	1.1389	3.41667	1.01795	5.58333	1.44212	4.28	1.51438	6.12	2.16641	哀哀切切	48	24	24	49	24	25	哀哀切切	7	26	哀	19.8346	9	哀	19.8346	9	切	653.46	4	切	653.46	4
4	哀痛欲绝	Wring one's heart to the very core	2.11905	1.25333	7.28571	1.34863	4.04167	2.16312	7.27083	0.916505	1.73684	1.04574	7.84211	1.01451	3.95652	1.98811	7.08696	0.99604	2.43478	1.34252	6.82609	1.43502	4.12	2.35089	7.44	0.820569	哀痛欲绝	42	19	23	48	23	25	哀痛欲绝	16	41	哀	19.8346	9	痛	230.662	12	欲	119.715	11	绝	360.979	9
5	唉声叹气	Moan and groan	2.9717	1.05521	5.63208	1.38925	5.56	1.76311	7.36	1.20814	3.21154	1.09072	5.40385	1.31745	5.96	1.56738	7.2	1.1547	2.74074	0.974877	5.85185	1.43287	5.16	1.88591	7.52	1.26227	唉声叹气	106	52	54	50	25	25	唉声叹气	589	26	唉	10.4011	10	声	768.616	7	叹	61.8438	5	气	1139.89	4
9	爱财如命	Covetous	2.99057	1.18318	5.93396	1.32571	5.29167	2.15326	7.125	1.56593	2.62963	1.23313	5.96296	1.47895	5.75	2.15184	7.08333	1.10007	3.36538	1.01032	5.90385	1.1591	4.83333	2.099	7.16667	1.94862	爱财如命	106	54	52	48	24	24	爱财如命	53	31	爱	637.994	10	财	387.507	7	如	1955.83	6	命	1075.17	8
11	爱出风头	Like to stay in the spotlight	3.1087	1.01605	5.67391	1.47655	5.78	1.76462	7.32	1.0583	3.09091	1.01929	5.45455	1.59545	5.88	1.85562	7.2	0.957427	3.125	1.03472	5.875	1.36135	5.68	1.70098	7.44	1.15758	爱出风头	46	22	24	50	25	25	爱出风头	85	24	爱	637.994	10	出	4757.26	5	风	877.382	4	头	1198.71	5
12	爱搭不理	Give [get] the cold shoulder	3.16327	0.874332	5.73469	1.23787	5.20833	2.05207	7.35417	1.24609	3.36	0.907377	5.76	1.0116	5.56	1.73397	7.12	1.33292	2.95833	0.80645	5.70833	1.45898	4.82609	2.32872	7.6087	1.11759	爱搭不理	49	25	24	48	25	23	爱搭不理	58	37	爱	637.994	10	搭	45.3807	12	不	9822.27	4	理	2917.08	11
29	暗箭伤人	To wound sb with a sniping arrow	2.63043	1.38818	6.58696	1.9041	3.83673	1.80678	6.95918	1.54055	2.6087	1.46905	5.91304	2.27462	4.08	1.77764	6.68	1.54704	2.65217	1.33514	7.26087	1.13688	3.58333	1.83958	7.25	1.51083	暗箭伤人	46	23	23	49	25	24	暗箭伤人	48	36	暗	149.673	13	箭	49.6416	15	伤	275.565	6	人	10357.8	2
41	白费口舌	Waste of tongue and mouth	3.02083	1.24609	5.72917	1.26726	4.40816	1.49887	6.97959	0.901152	2.84	1.21381	5.88	1.30128	4.52	1.55778	6.68	0.9	3.21739	1.27766	5.56522	1.23679	4.29167	1.45898	7.29167	0.80645	白费口舌	48	25	23	49	25	24	白费口舌	46	23	白	720.164	5	费	830.141	9	口	1079.29	3	舌	13.6236	6
42	白费心思	Waste of thought	3.18478	0.962397	5.58696	1.49928	4.52083	1.67573	7.29167	1.07106	3.25	1.07339	5.5	1.47442	5.17391	1.43502	6.95652	0.877924	3.11364	0.844193	5.68182	1.55491	3.92	1.68127	7.6	1.1547	白费心思	46	24	22	48	23	25	白费心思	28	27	白	720.164	5	费	830.141	9	心	2318.57	4	思	1002.68	9
44	白日见鬼	See ghosts in broad daylight	2.55556	1.17851	6.77778	1.34653	3.7551	1.67743	6.06122	2.23055	2.45455	1.18431	6.36364	1.52894	4.04	2.00998	5.52	2.53509	2.65217	1.19121	7.17391	1.02922	3.45833	1.21509	6.625	1.73988	白日见鬼	45	22	23	49	25	24	白日见鬼	26	22	白	720.164	5	日	3252.04	4	见	1255.38	4	鬼	87.8431	9
45	白日做梦	Indulge in wishful thinking	3.28261	1.20486	5.78261	1.24567	4.73585	1.8203	7.28302	1.11592	3.24	1.26754	5.64	1.31909	4.67857	1.72248	6.78571	1.10075	3.33333	1.1547	5.95238	1.16087	4.8	1.95789	7.84	0.85049	白日做梦	46	25	21	53	28	25	白日做梦	107	31	白	720.164	5	日	3252.04	4	做	672.695	11	梦	126.915	11
46	百般刁难	Create all sorts of obstacles	2.52174	1.13017	6.43478	1.68196	3.53191	1.8749	7.2766	0.948732	2.52174	1.16266	5.86957	2.00691	3.65217	1.79921	7	0.904534	2.52174	1.12288	7	1.04447	3.41667	1.97631	7.54167	0.931533	百般刁难	46	23	23	47	23	24	百般刁难	92	28	百	560.83	6	般	384.564	10	刁	4.89026	2	难	719.944	10
51	百口莫辩	Beyond dispute	3.38462	1.20925	6.25	1.41935	3.68	1.81198	7.1	1.16496	3.70588	1.17122	5.70588	1.4042	4.32	1.79629	6.84	0.986577	3.07547	1.17423	6.77358	1.23478	3.04	1.61967	7.36	1.28712	百口莫辩	104	51	53	50	25	25	百口莫辩	32	35	百	560.83	6	口	1079.29	3	莫	156.478	10	辩	116.317	16
58	摆臭架子	Put on the dog; put on that disgusting airs	2.3617	1.05141	5.95745	1.65447	5.26	1.71202	7.2	0.968904	2.16	1.02794	5.72	1.94765	5.36	1.75309	6.92	0.909212	2.59091	1.05375	6.22727	1.23179	5.16	1.7	7.48	0.962635	摆臭架子	47	25	22	50	25	25	摆臭架子	39	35	摆	117.522	13	臭	27.9964	10	架	149.34	9	子	3348.01	3
59	摆花架子	Flower arrangement	3.21739	1.03092	5.67391	1.57839	5.22449	1.66164	6.71429	1.27475	3.34783	1.15242	5.04348	1.7183	5.25	1.67462	6.75	0.944089	3.08696	0.900154	6.30435	1.14554	5.2	1.68325	6.68	1.54704	摆花架子	46	23	23	49	24	25	摆花架子	55	32	摆	117.522	13	花	625.91	7	架	149.34	9	子	3348.01	3
60	败军之将	Defeated general	3.34694	1.33153	5.85714	1.58114	4.66	2.0762	6.28	1.93823	3.2	1.35401	5.8	1.41421	4.64	1.84572	6.2	1.65831	3.5	1.31876	5.91667	1.76725	4.68	2.32236	6.36	2.2151	败军之将	49	25	24	50	25	25	败军之将	102	25	败	206.25	8	军	1900.38	6	之	2500.29	2	将	1120.39	9
62	班门弄斧	Display one's slight skill before an ecpert	3.33333	0.953463	5.57778	1.30539	5.25	1.6822	7.1875	1.21439	3.28571	1.0556	5.61905	1.24403	5.2	1.73205	6.92	1.11505	3.375	0.875388	5.54167	1.38247	5.30435	1.66337	7.47826	1.27456	班门弄斧	45	21	24	48	25	23	班门弄斧	101	28	班	262.181	10	门	1206.79	3	弄	94.0146	7	斧	9.75399	8
66	半吞半吐	Half concealing, half telling	3.45833	1.051	5.125	1.31481	5.02041	1.47888	6.63265	1.39484	3.24	1.12842	4.84	1.21381	5.25	1.32698	6.29167	1.16018	3.69565	0.926125	5.43478	1.37597	4.8	1.60728	6.96	1.54056	半吞半吐	48	25	23	49	24	25	半吞半吐	54	23	半	412.055	5	吞	39.3194	7	半	412.055	5	吐	49.3844	6
68	棒打鸳鸯	Break up affectionate couples	3.09524	1.2444	6.48571	1.24123	3.97872	1.96147	7	1.31876	3.66038	1.28517	6.07547	1.28376	4.26087	1.88818	6.73913	1.00983	2.51923	0.896406	6.90385	1.05272	3.70833	2.0319	7.25	1.53934	棒打鸳鸯	105	53	52	47	23	24	棒打鸳鸯	37	37	棒	22.0644	12	打	847.707	5	鸳	2.19507	10	鸯	2.18419	10
76	抱恨终身	Hatred for life	2.75	1.33091	6.59434	1.4783	4.16327	1.95093	7.14286	1.04083	3.01869	1.42074	6.28037	1.61242	4.76	2.02649	6.76	1.16476	2.47619	1.17747	6.91429	1.25663	3.54167	1.69344	7.54167	0.72106	抱恨终身	212	107	105	49	25	24	抱恨终身	19	32	抱	86.849	8	恨	59.7732	9	终	386.994	8	身	1129.97	7
77	悲愤交加	Grief and indignation	2.9505	1.28356	6.92079	1.28595	4.61224	1.86878	7.14286	1.24164	2.95833	1.35204	6.79167	1.36769	4.88	1.9	6.8	1.38444	2.9434	1.23125	7.03774	1.20834	4.33333	1.83366	7.5	0.978019	悲愤交加	101	48	53	49	25	24	悲愤交加	67	35	悲	112.186	12	愤	31.7401	12	交	1106.25	6	加	1892.76	5
78	悲观厌世	Be pessimistic and worldweary	2.65049	1.04515	6.07767	1.3981	4.13725	1.87638	7	1.26491	2.62745	1.09473	5.96078	1.39944	4.39286	1.95011	6.64286	1.44566	2.67308	1.00433	6.19231	1.40082	3.82609	1.77488	7.43478	0.843482	悲观厌世	103	51	52	51	28	23	悲观厌世	104	29	悲	112.186	12	观	879.674	6	厌	48.7353	6	世	1564.19	5
79	悲痛欲绝	Distraught	2.25	1.05929	7.29545	1.3568	4.52174	2.14724	7.73913	0.99855	2.14286	1.06234	6.90476	1.57812	4.90909	2.48633	7.40909	0.908116	2.34783	1.07063	7.65217	1.0273	4.16667	1.76109	8.04167	0.999094	悲痛欲绝	44	21	23	46	22	24	悲痛欲绝	614	44	悲	112.186	12	痛	230.662	12	欲	119.715	11	绝	360.979	9
90	笨头笨脑	Stupid	3.33333	0.952786	5.10417	1.24182	4.58333	1.77252	7.1875	1.21439	3.28	0.842615	5.12	1.20139	4.13043	1.51671	6.95652	1.02151	3.3913	1.07615	5.08696	1.31125	5	1.91485	7.4	1.35401	笨头笨脑	48	25	23	48	23	25	笨头笨脑	81	37	笨	14.4115	11	头	1198.71	5	笨	14.4115	11	脑	314.9	10
91	笨嘴拙舌	Awkward in speech	3.53191	1.06017	5.38298	1.3602	4.77083	1.66618	6.8125	1.28255	3.625	0.824226	5.25	1.18872	4.70833	1.48848	6.54167	1.25036	3.43478	1.27301	5.52174	1.53355	4.83333	1.85722	7.08333	1.28255	笨嘴拙舌	47	24	23	48	24	24	笨嘴拙舌	44	41	笨	14.4115	11	嘴	97.4276	16	拙	4.61877	8	舌	13.6236	6
93	比手划脚	Mime	3.79167	1.23699	5.4375	1.20117	5.81633	1.50932	7.18367	1.14879	3.84	0.986577	5.28	0.936305	5.83333	1.27404	7.04167	0.954585	3.73913	1.48377	5.6087	1.43777	5.8	1.73205	7.32	1.31403	比手划脚	48	25	23	49	24	25	比手划脚	38	25	比	1091.32	4	手	1414.05	4	划	509.885	6	脚	176.832	11
104	变相体罚	Disguised corporal punishment	2.79808	1.03698	6.47115	1.06084	3.6875	1.96952	6.875	1.45317	2.90566	1.02402	6.28302	1.04472	4.5	2.16695	6.79167	0.977093	2.68627	1.04862	6.66667	1.05198	2.875	1.36135	6.95833	1.82921	变相体罚	104	53	51	48	24	24	变相体罚	79	33	变	1060.95	8	相	1565.14	9	体	2253.44	7	罚	125.89	9
107	别无出路	There is no way out	3.34043	1.22077	5.70213	1.69289	3.29167	1.76199	6.83333	1.50649	3.375	1.34528	5.375	1.78916	3.72	1.96893	6.32	1.79629	3.30435	1.10514	6.04348	1.55149	2.82609	1.40299	7.3913	0.838783	别无出路	47	24	23	48	25	23	别无出路	90	29	别	1182.98	7	无	1828.92	4	出	4757.26	5	路	1036.73	13
115	秉性难移	It's hard to change one's nature	3.60377	1.1185	5.5283	1.36072	3.34043	1.59178	7.21277	1.23246	3.96226	1.0735	5.26415	1.30312	3.6087	1.75134	6.82609	1.02922	3.24528	1.0544	5.79245	1.37783	3.08333	1.41165	7.58333	1.31601	秉性难移	106	53	53	47	23	24	秉性难移	45	37	秉	3.31915	8	性	1799.09	8	难	719.944	10	移	236.362	11
117	病病歪歪	Illness	3.04167	1.25407	5.08333	1.52753	4.02041	1.6893	6.77551	1.50368	2.84	1.51877	4.96	1.45717	4.16667	1.6594	6.91667	1.01795	3.26087	0.864312	5.21739	1.62247	3.88	1.73973	6.64	1.86815	病病歪歪	48	25	23	49	24	25	病病歪歪	57	38	病	616.88	10	病	616.88	10	歪	23.2034	9	歪	23.2034	9
129	不分皂白	Without distinguishing between right and wrong	2.75	1.12041	6.1875	1.7704	4.72	1.65418	7.18	0.825363	2.95833	1.0417	5.45833	1.86452	4.42308	1.52769	7.03846	0.773603	2.54167	1.17877	6.91667	1.34864	5.04167	1.75646	7.33333	0.868115	不分皂白	48	24	24	50	26	24	不分皂白	95	20	不	9822.27	4	分	3077.2	4	皂	5.52102	7	白	720.164	5
130	不服水土	Not accustomed to the climate of a new place	3.75556	1.04785	5.66667	1.08711	3.27083	1.26726	7.04167	1.27092	3.56522	1.19947	5.47826	1.30974	3.56522	1.40861	6.86957	1.14035	3.95455	0.843873	5.86364	0.774317	3	1.08012	7.2	1.38444	不服水土	45	23	22	48	23	25	不服水土	43	19	不	9822.27	4	服	823.452	8	水	1535.76	4	土	568.512	3
133	不告而别	Do not say goodbye	3.42593	1.0608	5.84259	1.20871	5.20833	2.09313	7.35417	1.04147	3.46296	1.05889	5.77778	0.94503	5.79167	1.74404	7.08333	0.928611	3.38889	1.07135	5.90741	1.43104	4.625	2.28059	7.625	1.09594	不告而别	108	54	54	48	24	24	不告而别	102	24	不	9822.27	4	告	784.407	7	而	2283.95	6	别	1182.98	7
135	不吉之兆	Unlucky	2.7767	1.15412	6.40777	1.26365	3.34	1.69766	6.56	1.86438	2.96154	1.34254	6.17308	1.41034	3.92	1.86905	6	1.89297	2.58824	0.898365	6.64706	1.05496	2.76	1.3	7.12	1.69115	不吉之兆	103	52	51	50	25	25	不吉之兆	28	18	不	9822.27	4	吉	52.0911	6	之	2500.29	2	兆	31.8857	6
139	不劳而食	Eat the bread of idleness	2.89109	1.12161	6.08911	1.04975	5.10638	1.7844	6.91489	1.42691	2.78	1.1119	6.14	0.989949	5.17391	1.52709	6.86957	1.09977	3	1.13137	6.03922	1.11285	5.04167	2.0319	6.95833	1.70623	不劳而食	101	50	51	47	23	24	不劳而食	49	26	不	9822.27	4	劳	310.929	7	而	2283.95	6	食	423.122	9
141	不男不女	To look neither like a woman nor a man	3.29787	1.42821	5.6383	1.71218	4.70588	1.06384	6.84314	1.31716	3	1.3484	5.08696	1.83187	4.51852	1.25178	6.48148	1.28214	3.58333	1.47196	6.16667	1.43456	4.91667	0.775532	7.25	1.25974	不男不女	47	23	24	51	27	24	不男不女	76	18	不	9822.27	4	男	316.906	7	不	9822.27	4	女	1009.76	3
143	不清不白	Obscure; unclear	2.97826	0.999758	5.80435	1.22238	4.33333	1.56196	6.75	1.50884	2.875	0.991814	5.66667	1.43456	4.33333	1.60615	6.54167	1.5598	3.09091	1.01929	5.95455	0.950051	4.33333	1.55106	6.95833	1.45898	不清不白	46	24	22	48	24	24	不清不白	65	24	不	9822.27	4	清	730.146	11	不	9822.27	4	白	720.164	5
144	不求上进	Do not seek to advance	2.70833	1.09074	5.64583	1.87355	5.19231	1.88948	7.32692	0.943942	2.66667	1.23945	5.375	2.06023	5.07407	1.7743	7.14815	0.907393	2.75	0.944089	5.91667	1.66594	5.32	2.03552	7.52	0.962635	不求上进	48	24	24	52	27	25	不求上进	102	21	不	9822.27	4	求	922	7	上	5278.79	3	进	2665.45	7
147	不识大体	To fail to see the large issues	3.12745	0.919229	5.94118	1.14168	4.82692	1.53036	7.15385	1.28924	3.25	0.947132	5.71154	1.24202	4.92857	1.33135	6.92857	1.38587	3	0.880631	6.18	0.98333	4.70833	1.75646	7.41667	1.1389	不识大体	102	52	50	52	28	24	不识大体	48	21	不	9822.27	4	识	685.949	7	大	6744.01	3	体	2253.44	7
148	不通人情	Stuffy	2.74468	1.24181	6.57447	1.41028	4.56	1.80882	7.1	1.35902	2.47826	1.20112	6.78261	1.20441	4.96	1.90351	6.68	1.40594	3	1.25109	6.375	1.58286	4.16	1.65025	7.52	1.19443	不通人情	47	23	24	50	25	25	不通人情	88	27	不	9822.27	4	通	1622.23	10	人	10357.8	2	情	1729.84	11
150	不祥之物	Hoodoo	2.97872	1.25956	5.93617	1.85805	3.6875	1.47542	6.9375	1.61649	3	1.446	5.56522	2.04108	3.95833	1.70623	6.33333	1.90347	2.95833	1.08264	6.29167	1.62799	3.41667	1.17646	7.54167	0.977093	不祥之物	47	23	24	48	24	24	不祥之物	66	24	不	9822.27	4	祥	16.3004	10	之	2500.29	2	物	1894.3	8
151	不孝之子	Unfilial son	2.42308	1.09449	6.91827	1.33495	4.92	1.77097	6.84	1.44787	2.26923	1.13958	6.84615	1.487	4.76	1.73877	6.56	1.66032	2.57692	1.03557	6.99038	1.17361	5.08	1.82392	7.12	1.16619	不孝之子	104	52	52	50	25	25	不孝之子	60	16	不	9822.27	4	孝	8.89665	7	之	2500.29	2	子	3348.01	3
153	不战自败	Self defeating	3.5	1.50713	6.14151	1.35533	4	1.68325	6.79592	1.06026	3.4717	1.63617	6.16981	1.45094	4.12	2.00666	6.8	1.1547	3.5283	1.38124	6.11321	1.26583	3.875	1.2959	6.79167	0.977093	不战自败	106	53	53	49	25	24	不战自败	17	27	不	9822.27	4	战	1502.44	9	自	3316.74	6	败	206.25	8
155	不知高低	Can't tell high from low	3.40426	1.15457	5.61702	1.48255	4.82979	1.2738	6.6383	1.35816	3.58333	1.24819	5.33333	1.49395	5.04348	1.52191	6.65217	1.0273	3.21739	1.04257	5.91304	1.44326	4.625	0.969648	6.625	1.63687	不知高低	47	24	23	47	23	24	不知高低	55	29	不	9822.27	4	知	1298.23	8	高	2199.88	10	低	394.867	7
156	不知轻重	Have no appreciation of a thing's importance	3.38298	1.01195	5.53191	1.06017	5	1.59079	6.98	1.26958	3.33333	1.00722	5.29167	1.19707	5.12	1.64114	6.84	1.06771	3.43478	1.03687	5.78261	0.850482	4.88	1.56312	7.12	1.45258	不知轻重	47	24	23	50	25	25	不知轻重	105	30	不	9822.27	4	知	1298.23	8	轻	439.1	9	重	1984.12	9
163	财迷心窍	Mad about money	2.87963	1.03867	6.21296	1.21556	4.97917	1.83917	7.4375	1.00861	2.67273	1.12307	6.16364	1.22872	5.04348	1.60902	7.17391	0.936734	3.09434	0.904352	6.26415	1.21134	4.92	2.05994	7.68	1.02956	财迷心窍	108	55	53	48	23	25	财迷心窍	79	30	财	387.507	7	迷	150.526	9	心	2318.57	4	窍	4.1901	10
168	残花败柳	Compromise one's honour by adultery	3	1.01156	5.56818	1.71719	4.32	1.64677	6.78	1.51577	2.95455	1.0901	4.86364	1.83343	4.2	1.58114	6.72	1.06145	3.04545	0.950051	6.27273	1.2792	4.44	1.73397	6.84	1.88591	残花败柳	44	22	22	50	25	25	残花败柳	17	33	残	141.687	9	花	625.91	7	败	206.25	8	柳	14.0577	9
169	残破不全	Incomplete	3.02128	1.29362	5.3617	1.74985	4.14894	1.42918	6.78723	1.1021	2.76	1.2	5.12	1.81016	4	1.31426	6.3913	1.07615	3.31818	1.35879	5.63636	1.67745	4.29167	1.5458	7.16667	1.00722	残破不全	47	25	22	47	23	24	残破不全	41	29	残	141.687	9	破	408.047	10	不	9822.27	4	全	2321.82	6
170	惨不忍闻	Can't bear to hear cruel stories	2.57944	1.16585	6.76636	1.23303	3.78846	1.71883	6.84615	1.33409	2.33962	1.20804	6.88679	1.33964	3.75	1.75594	6.60714	1.61794	2.81481	1.08287	6.64815	1.11858	3.83333	1.711	7.125	0.850192	惨不忍闻	107	53	54	52	28	24	惨不忍闻	45	31	惨	49.6518	11	不	9822.27	4	忍	95.7626	7	闻	580.753	9
172	草草了事	To get a job done hastily	3.32353	0.891786	5.65686	1.1815	5.26087	2.00483	7.26087	0.953002	3.64	0.721676	5.36	0.963836	5.45455	2.01724	7.04545	0.785419	3.01923	0.939136	5.94231	1.30479	5.08333	2.01983	7.45833	1.06237	草草了事	102	50	52	46	22	24	草草了事	72	28	草	267.558	9	草	267.558	9	了	5827.94	2	事	2624.46	8
182	搽脂抹粉	Paint and powder one's face	3.82979	1.43435	5.06383	1.52379	6.125	1.45317	6.75	1.71972	3.47826	1.344	5.34783	0.982052	6.21739	1.24157	6.78261	1.24157	4.16667	1.46456	4.79167	1.8877	6.04	1.6452	6.72	2.09205	搽脂抹粉	47	23	24	48	23	25	搽脂抹粉	22	40	搽	1.04855	12	脂	26.7396	10	抹	22.4665	8	粉	111.631	10
185	豺狼虎豹	Giant beasts such as wolf, tiger and leopard	2.98958	1.23981	6.11458	1.53415	3.34615	1.58281	6.94231	1.37789	2.76	1.26754	6	1.68325	3.53571	1.97169	6.89286	1.44886	3.23913	1.1858	6.23913	1.38063	3.125	0.946963	7	1.31876	豺狼虎豹	48	25	23	52	28	24	豺狼虎豹	54	38	豺	1.54798	10	狼	27.4724	10	虎	76.5574	8	豹	9.392	10
197	朝秦暮楚	Be quick to switch sides	3.35417	1.46577	5.97917	1.48022	4.89583	1.40273	5.5625	2.37815	3.66667	1.27404	5.5	1.41421	4.66667	1.43456	5.25	2.02699	3.04167	1.60106	6.45833	1.41357	5.125	1.36135	5.875	2.69157	朝秦暮楚	48	24	24	48	24	24	朝秦暮楚	95	49	朝	333.499	12	秦	67.575	10	暮	5.41284	14	楚	151.514	13
198	吵吵闹闹	Noisily	3.31429	1.02201	5.92857	1.07289	4.875	1.82914	7.45833	0.988408	3.2	1.0611	5.78182	1.25744	5.08696	1.99802	7	0.953463	3.44	0.972269	6.09	0.806162	4.68	1.67631	7.88	0.832666	吵吵闹闹	105	55	50	48	23	25	吵吵闹闹	360	30	吵	26.8049	7	吵	26.8049	7	闹	82.7868	8	闹	82.7868	8
199	沉湎酒色	Overindulge oneself in wine and women	2.6875	1.25742	5.95833	1.71301	4.67925	1.93921	6.32075	1.57838	2.875	1.454	5.54167	1.86452	4.35714	1.70434	6	1.63299	2.5	1.02151	6.375	1.46888	5.04	2.15019	6.68	1.46401	沉湎酒色	48	24	24	53	28	25	沉湎酒色	48	35	沉	227.009	7	湎	0.701525	12	酒	253.867	10	色	949.075	6
204	成群结伙	In groups	3.9375	1.22746	5.47917	1.05164	5.24	1.97495	6.98	1.59706	3.875	1.03472	5.58333	0.717282	5.16	1.97231	6.8	1.5	4	1.41421	5.375	1.31256	5.32	2.01494	7.16	1.7	成群结伙	48	24	24	50	25	25	成群结伙	86	34	成	3751.08	6	群	482.108	13	结	1221.7	9	伙	145.707	6
207	诚惶诚恐	With profound respect and humility	3.26087	1.23711	6.06522	1.28931	4.14583	1.76237	6.85417	1.62415	3.45455	1.37069	6	1.02353	4.26087	1.68462	6.21739	1.75697	3.08333	1.10007	6.125	1.51263	4.04	1.85921	7.44	1.26095	诚惶诚恐	46	22	24	48	23	25	诚惶诚恐	525	38	诚	53.384	8	惶	10.6086	12	诚	53.384	8	恐	135.327	10
208	城门失火	Gate fire	2.8835	1.17407	6.85437	1.18328	3.06522	1.37279	6.69565	1.57578	2.4902	1.15538	7.05882	1.15606	2.86364	1.45718	6.54545	1.50324	3.26923	1.06854	6.65385	1.18627	3.25	1.2938	6.83333	1.6594	城门失火	103	51	52	46	22	24	城门失火	76	21	城	846.391	9	门	1206.79	3	失	590.556	5	火	508.645	4
210	乘隙而入	Take advantage of the crack and enter	3.5	1.32086	5.95833	1.41359	5.40816	1.91397	6.95918	1.20691	3.6	1.63299	6	1.32288	5.20833	2.26465	6.79167	1.31807	3.3913	0.891328	5.91304	1.53484	5.6	1.52753	7.12	1.0924	乘隙而入	48	25	23	49	24	25	乘隙而入	65	30	乘	115.403	10	隙	10.1221	12	而	2283.95	6	入	1407.48	2
211	吃粉笔灰	Eat chalk	3.02128	1.29362	5.61702	1.63592	4.71429	1.8143	6.89796	1.58436	2.84	1.31276	5.24	1.87705	5	1.84155	6.54167	1.21509	3.22727	1.26986	6.04545	1.21409	4.44	1.78139	7.24	1.83212	吃粉笔灰	47	25	22	49	24	25	吃粉笔灰	20	32	吃	273.555	6	粉	111.631	10	笔	229.554	10	灰	86.6652	6
213	吃里扒外	Eat in pick outside	2.35556	0.957163	6.51111	1.54658	4.32653	1.78405	7	1.32288	2.26087	0.915393	6.17391	1.92241	4.33333	1.83366	6.75	1.18872	2.45455	1.01076	6.86364	0.940894	4.32	1.77294	7.24	1.42244	吃里扒外	45	23	22	49	24	25	吃里扒外	35	26	吃	273.555	6	里	2015.7	7	爬	40.6871	8	外	2025.61	5
214	吃青春饭	Depend on youth to make a living	3.78723	1.41323	5.57447	1.28104	4.95833	1.99956	7.22917	1.27562	3.75	1.51083	5.625	1.1726	5.52	1.89561	7.04	1.20692	3.82609	1.33662	5.52174	1.41001	4.34783	1.96813	7.43478	1.34252	吃青春饭	47	24	23	48	25	23	吃青春饭	31	30	吃	273.555	6	青	908.566	8	春	316.163	9	饭	186.681	7
217	吃哑巴亏	Be unable to speak out about one's grievances	3.02174	1.10532	6.04348	1.77584	3.52083	1.6372	7.08333	1.21748	3.13636	0.940894	5.59091	1.86851	4.17391	1.82538	6.65217	1.07063	2.91667	1.24819	6.45833	1.61458	2.92	1.18743	7.48	1.22882	吃哑巴亏	46	22	24	48	23	25	吃哑巴亏	58	22	吃	273.555	6	哑	17.8185	9	巴	449.006	4	亏	69.0366	3
218	痴男怨女	Young men and wowen who are deeply in love but unable to fufil their passion	3.95146	1.0699	5.45631	1.03637	4.57447	1.62514	6.74468	1.4366	3.98077	0.999811	5.17308	0.90144	4.65217	1.5553	6.04348	1.4295	3.92157	1.14618	5.7451	1.09258	4.5	1.71945	7.41667	1.10007	痴男怨女	103	52	51	47	23	24	痴男怨女	66	32	痴	25.1855	13	男	316.906	7	怨	47.4649	9	女	1009.76	3
219	赤日炎炎	Red sun	3.83654	1.34461	5.83654	1.20767	2.92308	1.51911	7.5	1.16316	4.12963	1.3465	5.64815	1.21558	3.14815	1.74761	7.2963	1.17063	3.52	1.28158	6.04	1.17734	2.68	1.21518	7.72	1.13725	赤日炎炎	104	54	50	52	27	25	赤日炎炎	100	27	赤	25.2059	7	日	3252.04	4	炎	35.3954	8	炎	35.3954	8
220	充耳未闻	Unheard of the ears	3.89362	1.16533	5.51064	1.44271	5.25	1.53233	6.57692	1.27335	4.21739	1.24157	4.95652	1.39734	4.82143	1.49204	6.39286	1.42307	3.58333	1.01795	6.04167	1.30148	5.75	1.45213	6.79167	1.06237	充耳未闻	47	23	24	52	28	24	充耳未闻	2	26	充	354.884	6	耳	161.511	6	未	595.662	5	闻	580.753	9
222	愁肠百结	Sorrow	3.08511	1.26542	5.74468	1.42139	4.19231	1.54715	6.38462	1.61067	3.33333	1.40393	6.16667	1.09014	4.11111	1.42325	6.03704	1.60484	2.82609	1.07247	5.30435	1.60779	4.28	1.69607	6.76	1.56205	愁肠百结	47	24	23	52	27	25	愁肠百结	82	35	愁	30.7535	13	肠	60.4217	7	百	560.83	6	结	1221.7	9
223	愁眉紧锁	Worried frown	2.89362	1.23771	5.55319	1.69152	4.97959	1.80843	7.14286	1.59426	3.04348	1.22394	5.17391	1.85011	5.44	1.70978	6.68	1.79629	2.75	1.25974	5.91667	1.47196	4.5	1.81779	7.625	1.20911	愁眉紧锁	47	23	24	49	25	24	愁眉紧锁	37	44	愁	30.7535	13	眉	26.0245	9	紧	354.228	10	锁	62.6283	12
224	愁眉苦脸	A distressed expression	3.1028	0.999383	5.62617	1.2016	5.07843	1.90623	7.43137	1.00509	3.24074	1.08045	5.59259	1.12466	5.42308	1.79272	7.46154	0.859338	2.96226	0.897909	5.66038	1.28517	4.72	1.98997	7.4	1.1547	愁眉苦脸	107	54	53	51	26	25	愁眉苦脸	891	41	愁	30.7535	13	眉	26.0245	9	苦	332.425	8	脸	196.834	11
225	丑态毕露	Show the cloven hoof	2.81111	1.33693	6.04444	1.08619	4.55102	1.95854	6.95918	1.51326	2.84	1.62481	5.84	1.21381	5.04167	2.05319	6.70833	1.57367	2.775	0.89553	6.3	0.864505	4.08	1.77764	7.2	1.44338	丑态毕露	45	25	20	49	24	25	丑态毕露	26	39	丑	36.4943	4	态	234.592	8	毕	78.0789	6	露	213.384	21
226	臭不可闻	Stinky	2.10204	0.847666	6.5102	1.5562	3.7234	1.33028	6.70213	1.36597	1.84615	0.880559	6.65385	1.87494	4.04167	1.5458	6.66667	1.0495	2.3913	0.722315	6.34783	1.11227	3.3913	0.988071	6.73913	1.65742	臭不可闻	49	26	23	47	24	23	臭不可闻	84	28	臭	27.9964	10	不	9822.27	4	可	3245.08	5	闻	580.753	9
227	臭名昭彰	Notorious	2.6383	1.30926	6.38298	1.67531	4.34043	1.63224	6.93617	1.32541	2.65217	1.43364	6.04348	1.98811	4.26087	1.57299	6.6087	1.49967	2.625	1.20911	6.70833	1.26763	4.41667	1.71735	7.25	1.07339	臭名昭彰	47	23	24	47	23	24	臭名昭彰	72	39	臭	27.9964	10	名	1361.14	6	昭	6.31441	9	彰	9.79073	14
228	臭气冲天	Stench	2.18868	1.01525	6.81132	1.36705	4.04255	1.80528	7.04255	0.999075	2.16667	1.11169	6.62963	1.62871	4.17391	1.74908	6.82609	0.886883	2.21154	0.914728	7	1.00976	3.91667	1.88626	7.25	1.07339	臭气冲天	106	54	52	47	23	24	臭气冲天	72	24	臭	27.9964	10	气	1139.89	4	冲	255.455	6	天	2247.5	4
229	出口伤人	Offend by rude remarks	2.56311	0.996759	6.51942	1.18595	5.47826	2.10543	7.43478	1.02528	2.42593	1.05691	6.42593	1.32611	5.56522	2.1283	7.13043	0.919701	2.71429	0.912871	6.62245	1.01309	5.3913	2.12644	7.73913	1.05388	出口伤人	103	54	49	46	23	23	出口伤人	93	16	出	4757.26	5	口	1079.29	3	伤	275.565	6	人	10357.8	2
234	触景伤情	Feel very depressed at the prospect	3.65094	1.01458	5.75472	1.29329	5.08163	2.10987	7.38776	1.18702	3.81132	1.05715	5.79245	1.14956	5.64	1.7767	7.08	1.22202	3.49057	0.953186	5.71698	1.43282	4.5	2.30312	7.70833	1.08264	触景伤情	106	53	53	49	25	24	触景伤情	36	42	触	116.019	13	景	314.368	12	伤	275.565	6	情	1729.84	11
245	吹吹拍拍	Boasting and toadying	3.91667	1.49941	5.16667	1.54828	5.11538	1.65273	6.11538	2.04512	3.25	1.67462	5.58333	1.28255	4.85185	1.68029	7.11111	1.01274	4.58333	0.928611	4.75	1.70038	5.4	1.60728	5.04	2.33595	吹吹拍拍	48	24	24	52	27	25	吹吹拍拍	41	30	吹	62.265	7	吹	62.265	7	拍	156.061	8	拍	156.061	8
248	垂死挣扎	Give dying kicks	3.06542	1.37547	6.56075	1.31879	3.87755	1.79853	7.02041	1.23305	2.43636	1.18265	6.67273	1.47892	4.08333	1.99819	6.875	1.2959	3.73077	1.25425	6.44231	1.12744	3.68	1.6	7.16	1.17898	垂死挣扎	107	55	52	49	24	25	垂死挣扎	293	27	垂	62.7909	8	死	481.523	6	挣	29.6335	9	扎	88.6004	4
265	粗里粗气	The voice is loud	3.5	1.01058	5.29167	1.16616	5.44898	1.55538	6.81633	1.4094	3.58333	0.928611	5.54167	1.14129	5.48	1.55778	6.88	0.927362	3.41667	1.10007	5.04167	1.16018	5.41667	1.58572	6.75	1.79976	粗里粗气	48	24	24	49	25	24	粗里粗气	17	33	粗	75.1993	11	里	2015.7	7	粗	75.1993	11	气	1139.89	4
266	粗声大气	A deep, gruff voice	3.42857	1.08182	5.80952	1.1937	5.51064	1.86352	7	1.25109	3.5283	1.01154	5.69811	1.06672	5.73913	1.9121	6.91304	0.99604	3.32692	1.14996	5.92308	1.31128	5.29167	1.82921	7.08333	1.47196	粗声大气	105	53	52	47	23	24	粗声大气	64	25	粗	75.1993	11	声	768.616	7	大	6744.01	3	气	1139.89	4
269	存心不良	Evil thoughts	2.84783	1.03209	6.02174	1.66652	4.84	1.84457	6.88	1.43769	2.69565	1.10514	5.95652	1.8703	4.72	1.92614	6.72	1.36991	3	0.953463	6.08696	1.47442	4.96	1.79072	7.04	1.51327	存心不良	46	23	23	50	25	25	存心不良	95	21	存	596.102	6	心	2318.57	4	不	9822.27	4	良	292.367	7
270	寸步难移	Can hardly move a step	3.12766	1.20897	5.65957	1.90282	3.53061	1.89409	7.02041	1.26639	3.04348	1.29609	5.86957	1.6041	3.54167	1.74404	6.79167	1.10253	3.20833	1.14129	5.45833	2.16653	3.52	2.06398	7.24	1.39284	寸步难移	47	23	24	49	24	25	寸步难移	64	31	寸	44.8303	3	步	720.388	7	难	719.944	10	移	236.362	11
273	答非所问	Give an irrelevant answer	3.41584	0.851673	5.64356	1.08244	4.95918	1.74355	7.02041	1.1635	3.70833	0.770696	5.4375	0.896951	5.08333	1.6129	6.875	1.191	3.15094	0.841158	5.83019	1.20473	4.84	1.88591	7.16	1.1431	答非所问	101	48	53	49	24	25	答非所问	242	34	答	284.035	12	非	678.212	8	所	2259.17	8	问	1457.1	6
275	打马虎眼	In order to gloss it over	3.28261	0.934833	5.52174	1.42578	5.61702	1.5116	7.23404	0.937452	3.13043	1.05763	5.52174	1.64785	5.43478	1.40861	6.82609	0.650327	3.43478	0.787752	5.52174	1.20112	5.79167	1.61458	7.625	1.0135	打马虎眼	46	23	23	47	23	24	打马虎眼	39	27	打	847.707	5	马	1026.99	3	虎	76.5574	8	眼	606.508	11
276	打小报告	Inform secretly on a colleague [sb.]	2.57778	1.17722	6.46667	1.28982	4.89583	1.97042	7.20833	1.12908	2.63636	1.17698	6.04545	1.46311	5.33333	1.76109	6.95833	0.999094	2.52174	1.20112	6.86957	0.967863	4.45833	2.10546	7.45833	1.21509	打小报告	45	22	23	48	24	24	打小报告	68	22	打	847.707	5	小	2135.97	3	报	2394.79	7	告	784.407	7
282	大旱之年	Year of drought	2.85577	1.11841	6.27885	1.42418	2.69388	1.57062	6.83673	1.62464	2.90385	1.2408	5.96154	1.66817	3	1.83303	7.03846	1.24838	2.80769	0.990909	6.59615	1.05272	2.34783	1.15242	6.6087	1.97114	大旱之年	104	52	52	49	26	23	大旱之年	93	18	大	6744.01	3	旱	34.4972	7	之	2500.29	2	年	5151.12	6
287	大限已到	The limit has arrived(day of one's doom)	3.12381	1.56091	6.35238	1.57493	2.3913	1.52721	6.97826	1.30791	3.57692	1.70749	6.13462	1.28382	2.70833	1.78104	6.5	1.35133	2.67925	1.26755	6.56604	1.80288	2.04545	1.13294	7.5	1.05785	大限已到	105	52	53	46	24	22	大限已到	34	22	大	6744.01	3	限	484.816	8	已	1213.41	3	到	4030.49	8
291	呆若木鸡	Dumb as a wooden chicken	3.41667	1.14545	4.95833	1.68798	4.85417	1.83337	6.89583	1.27562	3.375	1.0135	5	1.61515	4.34783	1.5553	6.6087	1.23359	3.45833	1.28466	4.91667	1.79169	5.32	1.97315	7.16	1.28062	呆若木鸡	48	24	24	48	23	25	呆若木鸡	426	26	呆	46.564	7	若	216.964	8	木	274.901	4	鸡	85.1377	7
293	代人受过	Scapegoat; suffer for the faults of another	3.68519	1.5627	6.25	1.27613	4.65306	2.01609	6.95918	1.42827	3.81481	1.68315	6.09259	1.15364	5.2	1.70783	6.6	1.41421	3.55556	1.43628	6.40741	1.38071	4.08333	2.18526	7.33333	1.37261	代人受过	108	54	54	49	25	24	代人受过	93	21	代	2017.15	5	人	10357.8	2	受	972.326	8	过	2727.03	6
303	弹尽援绝	Run out of ammunition with no reinforcements in sight	2.91111	1.36219	6.51111	1.75321	3.34694	1.99532	6.20408	1.96829	2.86364	1.61232	6.18182	2.1075	3.625	2.374	6.16667	2.16025	2.95652	1.10693	6.82609	1.30217	3.08	1.55242	6.24	1.80924	弹尽援绝	45	22	23	49	24	25	弹尽援绝	41	38	弹	245.239	11	尽	407.054	6	援	57.6455	12	绝	360.979	9
306	当断不断	Be indecisive when decision is needed	3.29787	1.21431	5.95745	1.54579	4.21277	1.88744	7.12766	1.11545	3.04348	1.10693	5.52174	1.62003	5.08696	1.99802	6.82609	1.02922	3.54167	1.28466	6.375	1.37722	3.375	1.34528	7.41667	1.1389	当断不断	47	23	24	47	23	24	当断不断	71	32	当	1983.76	6	断	527.891	11	不	9822.27	4	断	527.891	11
307	当耳边风	Take like a passing wind	3.37864	1.0301	5.8932	0.979322	5.77551	1.61071	7.28571	1.04083	3.63462	1.10309	5.69231	0.78061	5.68	1.4922	7.08	1.03763	3.11765	0.8865	6.09804	1.11812	5.875	1.75233	7.5	1.02151	当耳边风	103	52	51	49	25	24	当耳边风	35	21	当	1983.76	6	耳	161.511	6	边	577.86	5	风	877.382	4
308	当牛做马	Willing to wait for others, to listen to others, to be enslaved.	3.36458	1.57013	5.79167	1.68798	4.13725	1.93927	7.21569	1.00625	2.8	1.58114	5.88	1.87794	4.07692	1.74179	7.03846	0.958364	3.97826	1.33551	5.69565	1.49042	4.2	2.16025	7.4	1.04083	当牛做马	48	25	23	51	26	25	当牛做马	43	24	当	1983.76	6	牛	163.192	4	做	672.695	11	马	1026.99	3
309	当冤大头	When a person deceived on account of his generosity	2.65957	1.40305	6.06383	2.06844	3.77083	1.54699	6.85417	1.20265	2.56522	1.27301	5.47826	2.53825	4.26087	1.71139	6.6087	0.838783	2.75	1.53934	6.625	1.31256	3.32	1.249	7.08	1.44106	当冤大头	47	23	24	48	23	25	当冤大头	21	24	当	1983.76	6	冤	21.369	10	大	6744.01	3	头	1198.71	5
310	刀山火海	Most dangerous places	4	1.52256	6.31111	1.60712	3.29412	1.64066	6.96078	1.24837	4.2381	1.48003	5.66667	1.42595	3.53846	1.90223	6.84615	1.15559	3.79167	1.5598	6.875	1.56906	3.04	1.30639	7.08	1.35154	刀山火海	45	21	24	51	26	25	刀山火海	32	19	刀	99.3886	2	山	1013.65	3	火	508.645	4	海	1315.95	10
312	倒买倒卖	Illegal dealing	3.1875	1.23178	5.83333	1.22619	5.30612	1.82807	6.7551	1.4653	2.92	1.15181	5.76	1.39284	5.375	1.95187	6.625	1.27901	3.47826	1.27456	5.91304	1.04067	5.24	1.73877	6.88	1.64114	倒买倒卖	48	25	23	49	24	25	倒买倒卖	196	34	倒	242.688	10	买	302.483	6	倒	242.688	10	卖	240.384	8
316	道听途说	There is no basis for rumour	3.63043	1.18056	5.34783	1.56656	4.77083	1.65336	7.16667	1.13613	3.34783	1.33514	4.73913	1.88818	4.66667	1.52277	6.95833	1.0417	3.91304	0.949308	5.95652	0.824525	4.875	1.80127	7.375	1.20911	道听途说	46	23	23	48	24	24	道听途说	418	38	道	2174.2	12	听	477.837	7	途	85.4078	10	说	2761.37	9
319	低眉顺眼	Obedient	3.95146	1.12353	5.14563	1.23199	5.34694	1.77425	6.87755	1.31708	4.23529	1.15911	5.03922	1.09473	5.64	1.35031	6.76	1.2	3.67308	1.02366	5.25	1.35582	5.04167	2.11576	7	1.44463	低眉顺眼	103	51	52	49	25	24	低眉顺眼	41	36	低	394.867	7	眉	26.0245	9	顺	192.321	9	眼	606.508	11
337	跌跌撞撞	Stumble	3.5625	1.1468	5.5	1.51587	4.98	1.82377	7.08	1.4119	3.4	1.41421	5.4	1.44338	5.16	1.92959	6.84	1.54596	3.73913	0.751809	5.6087	1.61637	4.8	1.73205	7.32	1.249	跌跌撞撞	48	25	23	50	25	25	跌跌撞撞	643	54	跌	49.466	12	跌	49.466	12	撞	50.8419	15	撞	50.8419	15
341	丢盔弃甲	Fly pellmell	3.07692	1.11209	6.29808	1.34294	4.34694	2.03665	6.67347	1.84151	3.18519	1.0653	5.96296	1.46613	4.44	2.16179	6.4	1.97906	2.96	1.15987	6.66	1.09935	4.25	1.9393	6.95833	1.68056	丢盔弃甲	104	54	50	49	25	24	丢盔弃甲	65	29	丢	39.1303	6	盔	2.41894	11	弃	53.252	7	甲	131.148	5
342	丢三落四	Miss this and that	3.04167	1.11008	5.39583	1.18033	4.40385	1.74063	7.53846	0.959198	2.76	1.26754	5.36	1.25433	5.14815	1.79108	7.33333	0.960769	3.34783	0.831685	5.43478	1.12112	3.6	1.29099	7.76	0.925563	丢三落四	48	25	23	52	27	25	丢三落四	105	26	丢	39.1303	6	三	1255.48	3	落	422.942	12	四	747.386	5
347	动来动去	Moving around	3.90426	1.08166	5.37234	1.0605	5.71429	1.6457	7.16327	1.17875	4.08	1.11505	5.24	1.09087	5.84	1.57268	6.92	1.18743	3.70455	1.03117	5.52273	1.02907	5.58333	1.74248	7.41667	1.1389	动来动去	47	25	22	49	25	24	动来动去	44	24	动	3207.89	6	来	4682.8	7	动	3207.89	6	去	1621.28	5
351	斗鸡走狗	Enjoy cockfights and dogracing	3.54167	1.55684	5.5	1.57101	5.3617	1.13109	5.2766	1.93033	3.24	1.50776	5.32	1.65126	5.04348	0.76742	5.65217	1.40158	3.86957	1.5755	5.69565	1.49042	5.66667	1.34056	4.91667	2.30154	斗鸡走狗	48	25	23	47	23	24	斗鸡走狗	32	26	斗	441.536	4	鸡	85.1377	7	走	731.55	7	狗	47.5663	8
353	嘟嘟哝哝	Mumble in whispers	3.58696	1.12696	5.02174	1.4528	5.2549	1.84221	6.96078	1.39944	3.41667	1.24819	5.125	1.39292	4.85185	1.9156	7.07407	1.035	3.77273	0.972567	4.90909	1.54023	5.70833	1.68056	6.83333	1.73623	嘟嘟哝哝	46	24	22	51	27	24	嘟嘟哝哝	148	44	嘟	6.56277	13	嘟	6.56277	13	哝	1.93719	9	哝	1.93719	9
358	断子绝孙	Die without descendants	1.84783	1.22868	7.36957	1.74303	3.18	1.5345	6.54	2.12094	1.5	0.722315	7.16667	2.03591	3.28	1.54164	6.16	2.11503	2.22727	1.54093	7.59091	1.36832	3.08	1.55242	6.92	2.1	断子绝孙	46	24	22	50	25	25	断子绝孙	94	29	断	527.891	11	子	3348.01	3	绝	360.979	9	孙	44.6193	6
361	多吃多占	Consume and take more than one's due	3.01471	1.27515	5.93137	1.23689	5.6	1.76126	6.58	1.75068	2.5	1.14731	6.28	1.08872	5.68	1.86458	6.88	1.61555	3.50962	1.20249	5.59615	1.28734	5.52	1.68622	6.28	1.86011	多吃多占	102	50	52	50	25	25	多吃多占	88	23	多	2609.35	6	吃	273.555	6	多	2609.35	6	占	319.818	5
362	多愁多病	Laden with sorrow and maladies	3	1.42887	5.95918	1.47138	3.74468	1.95012	7.02128	1.29362	2.72	1.33915	6.24	1.45144	4	1.84155	6.70833	1.30148	3.29167	1.48848	5.66667	1.46456	3.47826	2.06419	7.34783	1.22877	多愁多病	49	25	24	47	24	23	多愁多病	38	35	多	2609.35	6	愁	30.7535	13	多	2609.35	6	病	616.88	10
365	哆哆嗦嗦	Shiver	3.31111	0.949216	5.55556	1.42311	4.68085	1.61658	7.10638	1.25515	3.22727	1.066	5.81818	1.33225	4.77273	1.50971	6.95455	1.0455	3.3913	0.838783	5.30435	1.49042	4.6	1.73205	7.24	1.42244	哆哆嗦嗦	45	22	23	47	22	25	哆哆嗦嗦	285	44	哆	2.61558	9	哆	2.61558	9	嗦	3.12863	13	嗦	3.12863	13
366	躲躲藏藏	Hide	3.23913	0.82151	5.45652	1.16822	5.18367	1.88937	7.38776	1.05705	3.17391	1.02922	5.47826	1.3774	5.56	2.04287	7.16	1.17898	3.30435	0.558796	5.43478	0.945135	4.79167	1.66757	7.625	0.875388	躲躲藏藏	46	23	23	49	25	24	躲躲藏藏	87	60	躲	27.1118	13	躲	27.1118	13	藏	251.115	17	藏	251.115	17
367	恶声恶气	Angry voices and hard words	2.3125	1.1328	6.27083	2.01842	4.59184	1.82481	6.77551	1.59772	2.33333	1.20386	5.91667	2.24416	4.75	1.89393	6.5	1.56038	2.29167	1.08264	6.625	1.73988	4.44	1.78139	7.04	1.61967	恶声恶气	48	24	24	49	24	25	恶声恶气	52	31	恶	188.285	10	声	768.616	7	恶	188.285	10	气	1139.89	4
368	恶言恶语	Cursing	2.34783	1.09985	6.71739	1.70832	5.0625	1.89519	7.02083	1.13905	2.18182	1.05272	6.5	1.99404	5.30435	1.81996	6.86957	0.967863	2.5	1.14208	6.91667	1.41165	4.84	1.97231	7.16	1.28062	恶言恶语	46	22	24	48	23	25	恶言恶语	66	36	恶	188.285	10	言	674.584	7	恶	188.285	10	语	255.897	9
369	恶语伤人	Speak daggers to sb	2.34783	0.9937	6.58696	1.72016	5.04255	2.16652	7.34043	1.16613	2.22727	0.972567	6.18182	1.99132	5.16667	2.11961	7.125	0.899879	2.45833	1.02062	6.95833	1.36666	4.91304	2.25455	7.56522	1.37597	恶语伤人	46	22	24	47	24	23	恶语伤人	61	27	恶	188.285	10	语	255.897	9	伤	275.565	6	人	10357.8	2
370	恶语中伤	Viciously slander	2.30476	0.931539	6.75238	1.19116	4.44898	2.02136	7.10204	1.02561	2.2963	1.0574	6.5	1.24005	5.125	2.09165	7.08333	1.01795	2.31373	0.787152	7.01961	1.0861	3.8	1.75594	7.12	1.05357	恶语中伤	105	54	51	49	24	25	恶语中伤	42	29	恶	188.285	10	语	255.897	9	中	7314.64	4	伤	275.565	6
371	饿虎扑食	(rush at... like) a hungry tiger at its prey	3.52174	1.531	6.30435	1.64478	3.91667	1.98755	6.64583	1.73192	3.31818	1.2868	6.27273	1.35161	3.41667	1.74248	6.33333	1.99274	3.70833	1.73153	6.33333	1.90347	4.41667	2.12473	6.95833	1.39811	饿虎扑食	46	22	24	48	24	24	饿虎扑食	49	32	饿	25.7441	10	虎	76.5574	8	扑	40.8184	5	食	423.122	9
372	饿虎扑羊	A hungry tiger pouncing on its prey	3.42222	1.54462	6.46667	1.28982	4.06122	1.98335	6.69388	1.71031	3.45455	1.76547	6.04545	1.36198	3.64	2.19621	6.36	2.15793	3.3913	1.33958	6.86957	1.09977	4.5	1.66812	7.04167	0.999094	饿虎扑羊	45	22	23	49	25	24	饿虎扑羊	4	29	饿	25.7441	10	虎	76.5574	8	扑	40.8184	5	羊	86.095	6
373	恩断义绝	End the relationship	2.04444	1.10691	7.31111	1.80683	4.5625	2.21125	7.22917	1.18931	1.86364	0.990212	6.90909	2.26588	4.47826	2.08609	6.86957	1.25424	2.21739	1.20441	7.69565	1.14554	4.64	2.36079	7.56	1.04403	恩断义绝	45	22	23	48	23	25	恩断义绝	32	33	恩	222.287	10	断	527.891	11	义	1204.83	3	绝	360.979	9
375	恩恩怨怨	Engraining and resentment	3.5	1.25478	5.875	1.39337	4.76596	1.84406	7.23404	0.839585	3.36	1.38082	5.84	1.46287	5.17391	1.94591	7.17391	0.777652	3.65217	1.11227	5.91304	1.34547	4.375	1.68916	7.29167	0.907896	恩恩怨怨	48	25	23	47	23	24	恩恩怨怨	279	38	恩	222.287	10	恩	222.287	10	怨	47.4649	9	怨	47.4649	9
376	恩将仇报	Bite the hand that feeds one	2.01961	0.922549	7.14706	1.40999	4.44898	2.05204	7.57143	1.04083	2.04	0.946745	7.08	1.42628	4.48	1.93907	7.24	1.05198	2	0.907485	7.21154	1.40498	4.41667	2.20507	7.91667	0.928611	恩将仇报	102	50	52	49	25	24	恩将仇报	178	30	恩	222.287	10	将	1120.39	9	仇	43.8783	4	报	2394.79	7
384	翻来覆去	Toss about	3.78261	1.17214	5.34783	1.41763	5.18	1.89187	7.22	1.14802	3.48	1.32665	5.36	1.35031	5.32	1.6	7.08	1.07703	4.14286	0.853564	5.33333	1.52753	5.04	2.16949	7.36	1.22066	翻来覆去	46	25	21	50	25	25	翻来覆去	933	48	翻	140.228	18	来	4682.8	7	覆	25.7278	18	去	1621.28	5
385	翻脸无情	Ruthless	2.73913	1.48226	6.67391	1.67404	4.12	2.05675	7.24	1.15281	2.56522	1.03687	6.13043	1.93777	4.15385	1.84808	7.26923	1.04145	2.91304	1.83187	7.21739	1.16605	4.08333	2.30154	7.20833	1.28466	翻脸无情	46	23	23	50	26	24	翻脸无情	30	44	翻	140.228	18	脸	196.834	11	无	1828.92	4	情	1729.84	11
387	反动权威	Counter authority	3.47917	1.41406	5.66667	1.6927	3.95652	1.99952	6.26087	2.03781	3.20833	1.444	5.45833	1.81729	3.78261	1.83294	6.3913	1.75134	3.75	1.35935	5.875	1.56906	4.13043	2.18058	6.13043	2.32192	反动权威	48	24	24	46	23	23	反动权威	50	25	反	1054.15	4	动	3207.89	6	权	1179.26	6	威	108.709	9
388	反反复复	Over and over	3.97959	0.94626	5.34694	1.25085	4.91837	1.61808	7.34694	0.990602	4.12	0.927362	5.56	0.960902	5.08333	1.5299	7	0.780189	3.83333	0.963087	5.125	1.48361	4.76	1.71464	7.68	1.06927	反反复复	49	25	24	49	24	25	反反复复	623	26	反	1054.15	4	反	1054.15	4	复	676.619	9	复	676.619	9
389	反咬一口	Make false countercharges	2.14286	0.935414	6.97959	1.29887	4.12766	1.9067	7.21277	1.1021	2.08	0.953939	7.12	1.42361	4.625	1.92946	6.70833	0.954585	2.20833	0.931533	6.83333	1.16718	3.6087	1.77711	7.73913	1.00983	反咬一口	49	25	24	47	24	23	反咬一口	93	17	反	1054.15	4	咬	28.6088	9	一	12712.2	1	口	1079.29	3
390	饭来张口	Eat a ready-cooked meal	3.5514	1.42242	5.68224	1.24838	5.7451	1.89571	7.41176	1.25182	4.03704	1.34533	5.42593	1.20693	6.19231	1.60048	7.30769	1.08699	3.0566	1.33611	5.9434	1.24677	5.28	2.09205	7.52	1.41774	饭来张口	107	54	53	51	26	25	饭来张口	101	24	饭	186.681	7	来	4682.8	7	张	605.575	7	口	1079.29	3
393	方寸已乱	One's heart is already upset	3.27184	1.02128	6.09709	1.32483	4.0625	1.79131	6.83333	1.05857	3.13462	0.990719	5.94231	1.41993	3.91304	1.83187	6.56522	1.12112	3.41176	1.04262	6.2549	1.21397	4.2	1.77951	7.08	0.953939	方寸已乱	103	52	51	48	23	25	方寸已乱	42	17	方	3269.88	4	寸	44.8303	3	已	1213.41	3	乱	203.363	7
400	飞沙走石	Flying sand and rolling pebbles	4	1.47442	5.78723	1.66728	3.54167	1.48694	6.6875	1.24039	3.52174	1.50362	6	1.3817	2.78261	1.41282	6.82609	0.834058	4.45833	1.31807	5.58333	1.90917	4.24	1.2	6.56	1.52971	飞沙走石	47	23	24	48	23	25	飞沙走石	187	22	飞	407.777	3	沙	250.466	7	走	731.55	7	石	524.158	5
403	肥肥胖胖	Fat	3.95833	1.16616	5.1875	1.63286	5	1.74404	7.18367	1.33344	4.25	1.11316	5.33333	0.916831	5.32	1.70098	6.92	1.35154	3.66667	1.16718	5.04167	2.13621	4.66667	1.76109	7.45833	1.28466	肥肥胖胖	48	24	24	49	25	24	肥肥胖胖	76	34	肥	99.8922	8	肥	99.8922	8	胖	27.7582	9	胖	27.7582	9
404	肥水外流	Rich water outflow	3.67347	1.17947	5.59184	1.35275	4.48077	1.76558	6.98077	1.59029	3.56	1.08321	5.68	1.249	4.53571	1.87542	6.78571	1.54817	3.79167	1.28466	5.5	1.47442	4.41667	1.66594	7.20833	1.64129	肥水外流	49	25	24	52	28	24	肥水外流	60	27	肥	99.8922	8	水	1535.76	4	外	2025.61	5	流	948.45	10
405	废话连篇	Talk downright nonsense	2.75962	1.06575	6.16346	1.16678	5.5625	1.73703	7.25	1.19396	3.05882	1.12092	5.84314	1.23891	5.70833	1.57367	6.79167	1.10253	2.4717	0.932403	6.4717	1.01154	5.41667	1.90917	7.70833	1.12208	废话连篇	104	51	53	48	24	24	废话连篇	83	38	废	97.6699	8	话	1185.64	8	连	505.817	7	篇	197.996	15
406	废铜烂铁	Scrap iron	3.60417	1.31666	4.85417	1.28807	5.08	1.91493	6.84	1.44787	3.52	1.32665	5	0.866025	4.4	1.47196	6.88	1.26886	3.69565	1.32921	4.69565	1.63581	5.76	2.08726	6.8	1.63299	废铜烂铁	48	25	23	50	25	25	废铜烂铁	77	38	废	97.6699	8	铜	68.3977	11	烂	48.5284	9	铁	327.13	10
423	风流罪过	The crime of promiscuity	3.34043	1.6455	5.82979	1.71082	4.4375	1.58324	5.89583	1.87071	3.17391	1.52709	5.3913	2.03914	4.34783	1.5553	5.52174	1.59173	3.5	1.7693	6.25	1.22474	4.52	1.63605	6.24	2.0672	风流罪过	47	23	24	48	23	25	风流罪过	23	33	风	877.382	4	流	948.45	10	罪	315.23	13	过	2727.03	6
441	负债累累	Be heavily in debt	2.32558	1.10671	6.55814	1.74986	3.18367	1.71602	7.38776	0.931315	2.21053	1.08418	6.94737	1.22355	3.61538	1.83471	7.23077	0.862911	2.41667	1.1389	6.25	2.04833	2.69565	1.4596	7.56522	0.992063	负债累累	43	19	24	49	26	23	负债累累	531	38	负	398.8	6	债	133.476	10	累	115.726	11	累	115.726	11
442	复仇主义	Vengeance	3.1028	1.29538	6.13084	1.39463	4.20408	1.71973	6.18367	1.81054	3.12963	1.4672	6.09259	1.48284	4.375	1.52693	6.29167	1.16018	3.07547	1.10678	6.16981	1.31172	4.04	1.90351	6.08	2.28983	复仇主义	107	54	53	49	24	25	复仇主义	74	21	复	676.619	9	仇	43.8783	4	主	4149.18	5	义	1204.83	3
447	赶尽杀绝	Spare none	2.27778	1.05289	6.81111	1.56412	3.22917	2.31774	6.89583	1.76538	1.86957	0.919701	6.86957	1.89027	4.25	2.67435	6.66667	1.83366	2.70455	1.03117	6.75	1.1726	2.20833	1.28466	7.125	1.70198	赶尽杀绝	45	23	22	48	24	24	赶尽杀绝	190	31	赶	147.179	10	尽	407.054	6	杀	224.641	6	绝	360.979	9
452	干干巴巴	Dry	3.6875	1.03464	4.61458	1.43749	4.62	1.2599	6.64	1.5748	3.56	1.15758	4.68	1.31403	4.38462	1.0612	6.65385	1.23101	3.82609	0.886883	4.54348	1.58769	4.875	1.42379	6.625	1.9068	干干巴巴	48	25	23	50	26	24	干干巴巴	19	14	干	755.392	3	干	755.392	3	巴	449.006	4	巴	449.006	4
456	高价商品	High price goods	3.89583	1.40273	5.35417	1.61758	4.10417	2.08581	7.39583	1.04657	3.72	1.59478	5.52	1.66132	3.65217	2.0804	7.04348	1.10693	4.08696	1.16436	5.17391	1.58551	4.52	2.04369	7.72	0.890693	高价商品	48	25	23	48	23	25	高价商品	66	36	高	2199.88	10	价	944.386	6	商	1163.68	11	品	1689.38	9
459	高温作业	High temperature operation	3.75728	1.29453	5.73786	1.1286	3.5102	1.5562	6.95918	1.38382	4.29412	1.00587	5.45098	0.923336	3.125	1.2959	6.75	1.2938	3.23077	1.33747	6.01923	1.24444	3.88	1.71561	7.16	1.46287	高温作业	103	51	52	49	24	25	高温作业	37	34	高	2199.88	10	温	303.688	12	作	4031.82	7	业	1866.64	5
461	搞小动作	Engage in little tricks	3	0.988826	5.78261	1.76274	5	1.913	7.3125	1.03464	2.86957	0.919701	5.26087	1.76371	5.07407	1.66239	6.88889	0.9337	3.13043	1.05763	6.30435	1.63581	4.90476	2.23394	7.85714	0.910259	搞小动作	46	23	23	48	27	21	搞小动作	63	29	搞	109.428	13	小	2135.97	3	动	3207.89	6	作	4031.82	7
462	疙疙瘩瘩	Rough	3.51064	1.21355	5.3617	1.55235	4.54	1.32803	6.84	1.5954	3.6087	1.03305	4.91304	1.37883	4.56	1.50222	6.76	1.09087	3.41667	1.38051	5.79167	1.61458	4.52	1.15902	6.92	1.99833	疙疙瘩瘩	47	23	24	50	25	25	疙疙瘩瘩	84	44	疙	2.52644	8	疙	2.52644	8	瘩	2.35293	14	瘩	2.35293	14
465	格杀不论	Regardless of killing	3.08511	1.50116	6.70213	1.39743	3.375	2.33953	6.8125	1.80609	2.91667	1.66594	6.54167	1.35066	3.65217	2.55145	6.82609	1.80031	3.26087	1.32175	6.86957	1.45553	3.12	2.14709	6.8	1.84842	格杀不论	47	24	23	48	23	25	格杀不论	17	26	格	956.484	10	杀	224.641	6	不	9822.27	4	论	1173.48	6
466	隔离审查	Put sb. in isolation and under investigation	3.41304	1.25744	6.08696	1.6442	2.95745	1.75645	7.06383	1.27525	2.95652	1.29609	5.86957	2.07374	3.58333	2.10417	6.91667	1.1389	3.86957	1.05763	6.30435	1.06322	2.30435	0.97397	7.21739	1.41282	隔离审查	46	23	23	47	24	23	隔离审查	241	39	隔	80.6979	12	离	486.518	10	审	293.834	8	查	569.783	9
475	耿耿于心	Brood on	3.81818	1.24401	5.86364	0.878448	5.02041	1.76174	7.12245	1.01309	3.95238	0.973457	5.61905	0.740013	5.54167	1.41357	6.95833	0.80645	3.69565	1.4596	6.08696	0.949308	4.52	1.93907	7.28	1.17331	耿耿于心	44	21	23	49	24	25	耿耿于心	25	27	耿	6.32734	10	耿	6.32734	10	于	3580.5	3	心	2318.57	4
476	哽哽咽咽	Choking with tears	3.5625	1.36688	5.3125	1.70302	4.94231	1.67348	7.21154	1.07259	3.66667	1.52277	5.41667	1.63964	4.96296	1.65207	7	1.14354	3.45833	1.21509	5.20833	1.7932	4.92	1.73013	7.44	0.960902	哽哽咽咽	48	24	24	52	27	25	哽哽咽咽	61	38	哽	3.48789	10	哽	3.48789	10	咽	25.2855	9	咽	25.2855	9
481	公报私仇	Use one's position to get even with another person for a private grudge	2.08889	1.10417	7.13333	1.57538	4.7551	2.08697	7.06122	1.42021	2.18182	1.25874	6.86364	1.90976	4.91667	2.18526	6.75	1.2938	2	0.953463	7.3913	1.15755	4.6	2.02073	7.36	1.49666	公报私仇	45	22	23	49	24	25	公报私仇	36	22	公	2641.25	4	报	2394.79	7	私	224.845	7	仇	43.8783	4
485	公款旅游	Sightseeing at public expenses	3.0297	1.97715	6.54455	1.559	5.52941	1.80392	6.92157	1.24649	2.12	1.23949	6.5	1.79853	5.96154	1.75455	6.80769	1.16685	3.92157	2.16188	6.58824	1.29887	5.08	1.77764	7.04	1.33791	公款旅游	101	50	51	51	26	25	公款旅游	95	38	公	2641.25	4	款	369.151	12	旅	296.412	10	游	500.564	12
490	沟沟岔岔	Ditch and gully	4	1.02151	4.82979	1.29076	3.96	1.38446	6.14	2.0001	3.95833	1.08264	4.70833	1.23285	3.88	1.50886	6.4	1.52753	4.04348	0.975997	4.95652	1.36443	4.04	1.2741	5.88	2.38607	沟沟岔岔	47	24	23	50	25	25	沟沟岔岔	37	28	沟	66.1917	7	沟	66.1917	7	岔	6.32802	7	岔	6.32802	7
491	狗拿耗子	Dogs going ratting	3.1619	1.04811	6.08571	1.05716	4.9	1.71726	7.1	1.24949	3.18519	1.19865	5.90741	1.06874	4.64	1.55134	6.8	1.1547	3.13725	0.87223	6.27451	1.02134	5.16	1.86369	7.4	1.29099	狗拿耗子	105	54	51	50	25	25	狗拿耗子	42	31	狗	47.5663	8	拿	278.84	10	耗	66.7681	10	子	3348.01	3
492	狗屁不通	The article is not smooth; unreasonable	2.65957	1.16613	6.48936	1.62684	4.63265	1.5771	6.95918	1.24095	2.78261	1.24157	6	1.80907	4.48	1.29486	6.64	1.38082	2.54167	1.10253	6.95833	1.30148	4.79167	1.84106	7.29167	0.999094	狗屁不通	47	23	24	49	25	24	狗屁不通	45	29	狗	47.5663	8	屁	13.4481	7	不	9822.27	4	通	1622.23	10
493	狗血淋头	Be cursed by	2.48889	1.16037	6.77778	1.78235	3.80851	1.36156	6.76596	1.60451	2.27273	1.03196	6.59091	2.0853	4.04	1.56738	6.36	1.72916	2.69565	1.25896	6.95652	1.46095	3.54545	1.05683	7.22727	1.34277	狗血淋头	45	22	23	47	25	22	狗血淋头	68	30	狗	47.5663	8	血	332.362	6	淋	41.0219	11	头	1198.71	5
494	狗仗人势	Like a dog threatening people on the strength of its master’s power	2.44	1.13101	6.78	1.25995	4.27083	2.01842	7.125	1.12278	2.38	1.14089	6.6	1.45686	4.75	1.87083	6.66667	1.00722	2.5	1.12938	6.96	1.00934	3.79167	2.08471	7.58333	1.05981	狗仗人势	100	50	50	48	24	24	狗仗人势	51	23	狗	47.5663	8	仗	38.5199	5	人	10357.8	2	势	267.427	8
495	孤魂野鬼	Ghost; wandering souls	2.77083	1.13437	6.33333	1.35793	3.9375	1.77939	6.39583	1.87639	2.64	1.25433	6.12	1.33292	4.4	2.06155	5.68	2.13542	2.91304	0.99604	6.56522	1.37597	3.43478	1.27301	7.17391	1.15413	孤魂野鬼	48	25	23	48	25	23	孤魂野鬼	48	41	孤	38.8166	8	魂	65.297	13	野	186.695	11	鬼	87.8431	9
496	孤苦伶仃	Lonely and helpless	2.93137	1.01727	5.92157	1.34743	3.52083	1.57087	7.02083	1.15758	2.86792	1.00073	5.83019	1.46413	3.54167	1.38247	6.875	0.946963	3	1.04083	6.02041	1.21604	3.5	1.7693	7.16667	1.34056	孤苦伶仃	102	53	49	48	24	24	孤苦伶仃	380	27	孤	38.8166	8	苦	332.425	8	伶	3.21436	7	仃	0.828766	4
497	孤苦零丁	Lonely and helpless	2.93478	1.04141	6.02174	1.55619	3.375	1.33089	7.0625	1.47902	3.04545	1.0901	5.68182	1.42716	3.5	1.31876	6.875	1.48361	2.83333	1.00722	6.33333	1.63299	3.25	1.35935	7.25	1.48177	孤苦零丁	46	22	24	48	24	24	孤苦零丁	37	31	孤	38.8166	8	苦	332.425	8	零	106.149	13	丁	108.855	2
498	孤苦无告	Orphaned and helpless	3.23404	1.10754	6.10638	1.12741	3.58333	1.52753	5.75	2.14873	3.16	1.1431	6.24	1.23423	3.5	1.53226	5.58333	2.06243	3.31818	1.08612	5.95455	0.998917	3.66667	1.55106	5.91667	2.26345	孤苦无告	47	25	22	48	24	24	孤苦无告	39	27	孤	38.8166	8	苦	332.425	8	无	1828.92	4	告	784.407	7
501	骨肉相残	Fratricidal fighting	2.10417	1.20706	7.08333	1.91115	4.17021	2.07803	7.14894	1.17914	2.20833	1.41357	6.54167	2.37705	3.78261	1.92959	6.82609	1.11405	2	0.978019	7.625	1.09594	4.54167	2.1865	7.45833	1.17877	骨肉相残	48	24	24	47	23	24	骨肉相残	76	33	骨	162.914	9	肉	163.063	6	相	1565.14	9	残	141.687	9
506	故技重演	Be up to one's old tricks	3.40952	1.07144	5.86667	1.23309	5.40426	1.61056	7.2766	1.05711	3.62264	1.09591	5.69811	1.29474	5	1.4771	6.91304	0.900154	3.19231	1.0105	6.03846	1.15405	5.79167	1.66757	7.625	1.09594	故技重演	105	53	52	47	23	24	故技重演	60	39	故	384.416	9	技	767.411	7	重	1984.12	9	演	530.825	14
508	故作高深	Pretending to be mysterious	3.29703	0.995435	5.69307	1.19785	5.36735	1.59026	7	1.13652	3.38	1.06694	5.56	1.3118	5.45833	1.50302	6.5	1.14208	3.21569	0.923336	5.82353	1.07156	5.28	1.69607	7.48	0.918332	故作高深	101	50	51	49	24	25	故作高深	37	37	故	384.416	9	作	4031.82	7	高	2199.88	10	深	665.861	11
509	故作镇静	To be calm	3.84444	1.20521	5.33333	1.3817	5.82979	1.79757	7.3617	0.895048	3.77273	1.30683	5.09091	1.4445	5.68182	1.49241	7.04545	0.72225	3.91304	1.12464	5.56522	1.30823	5.96	2.05102	7.64	0.95219	故作镇静	45	22	23	47	22	25	故作镇静	103	45	故	384.416	9	作	4031.82	7	镇	247.736	15	静	215.956	14
511	拐弯抹角	Bending around	3.52427	0.894917	5.57282	1.27265	4.71429	1.60728	7.16327	1.04775	3.84615	0.871884	5.21154	1.19372	4.96	1.6452	6.92	1.07703	3.19608	0.80049	5.94118	1.25558	4.45833	1.5598	7.41667	0.974308	拐弯抹角	103	52	51	49	25	24	拐弯抹角	350	32	拐	18.3417	8	弯	41.9561	9	抹	22.4665	8	角	305.106	7
512	怪里怪气	Bizarre	2.95652	1.07407	5.56522	1.45529	5.52083	1.4585	7.04167	1.27092	3.13043	0.967863	5.34783	1.5553	5.25	1.48177	6.66667	1.27404	2.78261	1.16605	5.78261	1.34693	5.79167	1.41357	7.41667	1.17646	怪里怪气	46	23	23	48	24	24	怪里怪气	91	27	怪	126.439	8	里	2015.7	7	怪	126.439	8	气	1139.89	4
513	怪腔怪调	Weird cavities	3.13131	0.876524	6.0202	0.925597	5.375	1.70886	6.91667	1.28549	3.2449	0.947158	5.97959	0.901152	5.69565	1.60779	6.69565	1.14554	3.02	0.795138	6.06	0.956396	5.08	1.77764	7.12	1.39403	怪腔怪调	99	49	50	48	23	25	怪腔怪调	64	38	怪	126.439	8	腔	48.4495	12	怪	126.439	8	调	936.981	10
514	怪声怪气	Strange voice and manner	2.84783	0.94204	5.54348	1.44078	5.28571	1.38444	7.06122	1.24847	2.77273	0.869144	5.45455	1.47122	5.375	1.52693	6.91667	0.928611	2.91667	1.01795	5.625	1.43898	5.2	1.25831	7.2	1.5	怪声怪气	46	22	24	49	24	25	怪声怪气	70	27	怪	126.439	8	声	768.616	7	怪	126.439	8	气	1139.89	4
519	官逼民反	Being oppressed by officials, the masses revolt against them	2.72115	1.43098	6.86538	1.50764	3.71739	2.20769	6.73913	1.6524	2.9434	1.74769	6.43396	1.79218	4.04167	2.34945	6.375	2.01759	2.4902	0.966903	7.31373	0.969334	3.36364	2.03646	7.13636	1.03719	官逼民反	104	53	51	46	24	22	官逼民反	89	29	官	513.013	8	逼	46.8981	12	民	2137.66	5	反	1054.15	4
521	冠冕堂皇	Highfalutin	3.5534	1.21048	5.76699	0.992164	4.75	1.39146	7.0625	1.11863	3.86792	1.33067	5.49057	0.932792	4.64	1.25433	6.68	1.28193	3.22	0.974993	6.06	0.977502	4.86957	1.54638	7.47826	0.730477	冠冕堂皇	103	53	50	48	25	23	冠冕堂皇	821	40	冠	51.2229	9	冕	4.37858	11	堂	217.514	11	皇	114.007	9
529	鬼鬼祟祟	Sneaking	2.71812	1.15712	6.11409	1.35831	4.88776	1.70435	7.11224	1.21742	2.34247	1.04375	6.17808	1.50317	4.79592	1.683	6.69388	1.31028	3.07895	1.15196	6.05263	1.2099	4.97959	1.73793	7.53061	0.959645	鬼鬼祟祟	149	73	76	98	49	49	鬼鬼祟祟	707	38	鬼	87.8431	9	鬼	87.8431	9	祟	2.1665	10	祟	2.1665	10
530	鬼话连篇	Tell a whole series of lies	2.51961	0.930563	6.36275	1.0416	5.02128	1.81167	7.29787	0.998148	2.28302	0.987954	6.35849	1.21044	5.6087	1.99406	7.08696	1.04067	2.77551	0.79753	6.36735	0.834013	4.45833	1.444	7.5	0.932505	鬼话连篇	102	53	49	47	23	24	鬼话连篇	30	39	鬼	87.8431	9	话	1185.64	8	连	505.817	7	篇	197.996	15
533	过河拆桥	Burn the bridge after crossing it	2.40426	1.15457	6.53191	1.73018	5.04167	2.14336	7.35417	0.999778	2.52174	1.20112	6.3913	1.67167	5.16667	2.29682	6.95833	1.0417	2.29167	1.12208	6.66667	1.8098	4.91667	2.01983	7.75	0.793999	过河拆桥	47	23	24	48	24	24	过河拆桥	99	32	过	2727.03	6	河	486.392	8	拆	44.0117	8	桥	139.532	10
540	含垢忍辱	Bear shame and humiliation	3.47826	1.57394	6.43478	1.55852	4.09615	1.6599	5.86538	2.23193	3.59091	1.6521	5.90909	1.54023	4.74074	1.72298	6.03704	1.76464	3.375	1.52693	6.91667	1.44212	3.4	1.29099	5.68	2.6727	含垢忍辱	46	22	24	52	27	25	含垢忍辱	48	33	含	206.609	7	垢	2.33388	9	忍	95.7626	7	辱	20.3095	10
541	含含混混	Ambiguous	3.76087	0.793999	5.52174	0.982946	5.36735	1.23649	6.55102	1.69633	3.77273	0.81251	5.45455	0.9625	5.25	1.22474	6.79167	1.02062	3.75	0.793999	5.58333	1.01795	5.48	1.26227	6.32	2.15484	含含混混	46	22	24	49	24	25	含含混混	24	36	含	206.609	7	含	206.609	7	混	143.079	11	混	143.079	11
544	含血喷人	Make slanderous charges at sb	2.24444	1.1512	7.13333	1.67332	4.40426	1.86104	6.76596	1.41748	2.22727	1.23179	6.63636	1.96506	4.73913	1.88818	6.3913	1.33958	2.26087	1.09617	7.6087	1.19617	4.08333	1.81579	7.125	1.42379	含血喷人	45	22	23	47	23	24	含血喷人	35	27	含	206.609	7	血	332.362	6	喷	48.1297	12	人	10357.8	2
545	含冤负屈	Suffer an unjust grievance	2.54348	1.24198	6.5	1.90613	3.16	1.50319	6.92	1.32234	2.59091	1.22121	6.04545	2.33966	3.53846	1.58065	6.84615	1.00766	2.5	1.28537	6.91667	1.31601	2.75	1.32698	7	1.61515	含冤负屈	46	22	24	50	26	24	含冤负屈	27	31	含	206.609	7	冤	21.369	10	负	398.8	6	屈	60.025	8
550	旱涝灾害	Drought and flood disaster	2.67391	1.15575	6.32609	1.68726	2.47826	1.51642	7.28261	1.16739	2.69565	1.25896	5.65217	1.87347	2.65217	1.6127	7.30435	0.97397	2.65217	1.07063	7	1.16775	2.30435	1.42812	7.26087	1.35571	旱涝灾害	46	23	23	46	23	23	旱涝灾害	140	34	旱	34.4972	7	涝	6.61788	10	灾	118.901	7	害	379.521	10
554	行凶作恶	Break the law and commit evils	1.85714	0.913874	7.34286	1.27723	3.82	1.87017	7.16	1.20136	1.59615	0.798519	7.44231	1.39204	3.53846	1.98456	6.80769	1.20064	2.11321	0.953947	7.24528	1.15867	4.125	1.72734	7.54167	1.10253	行凶作恶	105	52	53	50	26	24	行凶作恶	39	27	行	3839.45	6	凶	45.0881	4	作	4031.82	7	恶	188.285	10
556	好景不常	Not every day is sunday; a good time never lasts long	3.06818	0.974028	5.93182	1.48477	3.69388	1.59693	6.89796	1.69859	3.04545	1.21409	5.72727	1.7507	4.28	1.72047	6.2	1.91485	3.09091	0.683763	6.13636	1.16682	3.08333	1.21285	7.625	1.05552	好景不常	44	22	22	49	25	24	好景不常	70	33	好	1953.46	6	景	314.368	12	不	9822.27	4	常	1253.32	11
557	好梦难圆	Good dreams seldom come true.	3.97872	1.2767	5.74468	1.35884	3.91667	1.72384	7.14583	1.23753	3.73913	1.32175	5.43478	1.53226	4.16667	1.63299	7.125	1.07592	4.20833	1.21509	6.04167	1.12208	3.66667	1.8098	7.16667	1.40393	好梦难圆	47	23	24	48	24	24	好梦难圆	33	37	好	1953.46	6	梦	126.915	11	难	719.944	10	圆	135.24	10
559	好事之徒	A person who likes to meddlesome	3.22772	1.06659	5.84158	1.17246	4.57143	1.5	6.65306	1.37766	3.52941	1.17223	5.68627	1.02937	4.88462	1.3062	6.61538	1.26734	2.92	0.853325	6	1.29363	4.21739	1.65025	6.69565	1.52061	好事之徒	101	51	50	49	26	23	好事之徒	75	26	好	1953.46	6	事	2624.46	8	之	2500.29	2	徒	149.117	10
568	黑不溜秋	Black; 如果形容肤色黑：swarthy	3.79167	0.849489	5.04167	1.51529	4.34	1.28746	7.08	1.42628	3.66667	0.816497	5.33333	0.816497	4.12	1.30128	6.72	1.17331	3.91667	0.880547	4.75	1.96159	4.56	1.26095	7.44	1.58325	黑不溜秋	48	24	24	50	25	25	黑不溜秋	86	38	黑	323.568	12	不	9822.27	4	溜	26.032	13	秋	142.529	9
572	哼哼唧唧	Groan and moan	3.52174	1.42578	5.34783	1.44864	5.63265	1.37982	6.89796	1.53086	3.54545	1.37069	4.86364	1.67034	5.54167	1.69344	6.79167	1.14129	3.5	1.50362	5.79167	1.06237	5.72	1.02144	7	1.84842	哼哼唧唧	46	22	24	49	24	25	哼哼唧唧	250	40	哼	12.5553	10	哼	12.5553	10	唧	4.20235	10	唧	4.20235	10
575	横眉立目	Attitude is fierce	3.02128	1.13232	6.25532	1.72536	5.2449	1.86559	6.55102	1.72072	2.86957	1.14035	6.08696	2.15139	5.29167	1.62799	6.625	1.24455	3.16667	1.12932	6.41667	1.21285	5.2	2.10159	6.48	2.10396	横眉立目	47	23	24	49	24	25	横眉立目	52	34	横	132.619	15	眉	26.0245	9	立	1499.57	5	目	1386.17	5
576	横眉怒目	Face others with frowning brows and angry eyes	3.04348	1.54857	6.30435	1.90752	5.08333	1.93328	7.20833	0.988408	3	1.85864	6.13043	2.20133	5.26087	1.71139	7	0.738549	3.08696	1.20276	6.47826	1.59173	4.92	2.13931	7.4	1.1547	横眉怒目	46	23	23	48	23	25	横眉怒目	85	38	横	132.619	15	眉	26.0245	9	怒	83.2733	9	目	1386.17	5
577	横眉竖眼	Put on a fierce look	3.1875	1.26586	6.14583	1.41406	4.93617	1.73712	7.08511	1.13884	2.83333	1.16718	6.33333	1.6854	4.91304	1.97514	7.04348	0.824525	3.54167	1.28466	5.95833	1.08264	4.95833	1.51741	7.125	1.39292	横眉竖眼	48	24	24	47	23	24	横眉竖眼	31	44	横	132.619	15	眉	26.0245	9	竖	16.2766	9	眼	606.508	11
578	横生枝节	Branch out; to cause complication	3.5	1.16905	6	1.42984	3.87234	1.63677	6.78723	1.39776	3.63636	1.29267	6.04545	1.46311	3.86957	1.86607	6.43478	1.30823	3.375	1.05552	5.95833	1.42887	3.875	1.42379	7.125	1.42379	横生枝节	46	22	24	47	23	24	横生枝节	77	33	横	132.619	15	生	4823.71	5	枝	57.9456	8	节	631.945	5
588	后院起火	Backyard fire	2.93182	1.16933	6.86364	1.40747	3.58333	1.74835	6.70833	1.72538	2.65217	1.26522	6.69565	1.7693	3.83333	1.94862	6.5	1.66812	3.2381	0.995227	7.04762	0.86465	3.33333	1.52277	6.91667	1.79169	后院起火	44	23	21	48	24	24	后院起火	70	29	后	2743.81	6	院	1033.27	9	起	2047.96	10	火	508.645	4
592	呼天抢地	Extremely sad	3.38776	1.23855	5.97959	1.53419	4.64583	1.98387	6.39583	1.5944	3.32	1.4922	6.04	1.48549	4.83333	2.099	6.20833	1.38247	3.45833	0.931533	5.91667	1.6129	4.45833	1.8877	6.58333	1.79169	呼天抢地	49	25	24	48	24	24	呼天抢地	141	25	呼	243.298	8	天	2247.5	4	抢	89.9388	7	地	4442.5	6
595	忽冷忽热	Hot and cold	3.54167	0.944375	5.58333	1.04847	4.19565	1.57225	7.28261	1.04696	3.56	0.916515	5.72	0.890693	4.56522	1.7536	6.78261	0.902347	3.52174	0.994053	5.43478	1.19947	3.82609	1.30217	7.78261	0.951388	忽冷忽热	48	25	23	46	23	23	忽冷忽热	194	33	忽	135.535	8	冷	210.839	7	忽	135.535	8	热	606.285	10
597	忽悠忽悠	In a leisurely manner or rhythm	3.64583	1.15758	5.52083	1.48739	4.9375	1.8382	6.77083	1.47662	3.79167	1.14129	5.5	1.14208	4.79167	1.66757	6.79167	0.832971	3.5	1.17954	5.54167	1.7932	5.08333	2.01983	6.75	1.9393	忽悠忽悠	48	24	24	48	24	24	忽悠忽悠	27	38	忽	135.535	8	悠	38.1763	11	忽	135.535	8	悠	38.1763	11
598	狐假虎威	Rely on others to bully people	2.86792	1.0961	6.29245	1.32354	4.1875	1.68417	6.91667	1.39655	2.62264	1.21254	6.50943	1.31006	4	1.50362	6.625	1.09594	3.11321	0.912738	6.07547	1.31338	4.375	1.86063	7.20833	1.61458	狐假虎威	106	53	53	48	24	24	狐假虎威	141	36	狐	28.7353	8	假	289.79	11	虎	76.5574	8	威	108.709	9
599	狐狸尾巴	Evil intention	3.39362	1.35107	5.67021	1.22597	4.96078	1.56155	6.86275	1.29645	3.54167	1.50302	5.45833	1.02062	4.57692	1.4744	6.88462	1.07059	3.23913	1.1858	5.8913	1.3977	5.36	1.57797	6.84	1.51877	狐狸尾巴	47	24	23	51	26	25	狐狸尾巴	102	29	狐	28.7353	8	狸	3.74306	10	尾	77.1902	7	巴	449.006	4
600	狐朋狗友	Evil associates	2.72115	1.16132	6.11538	1.3675	4.5	1.82036	7.25	1.08239	2.4902	1.04638	6.09804	1.41781	4.18519	1.49453	6.85185	1.06351	2.9434	1.23125	6.13208	1.33067	4.84	2.09523	7.68	0.945163	狐朋狗友	104	51	53	52	27	25	狐朋狗友	100	28	狐	28.7353	8	朋	134.63	8	狗	47.5663	8	友	481.856	4
601	胡搅蛮缠	Importune	2.26214	0.91781	6.90291	1.10715	4.8913	2.11059	7.52174	0.960072	2.19608	0.916943	6.7451	1.14618	5.90909	1.68775	7.31818	0.893701	2.32692	0.922936	7.05769	1.05558	3.95833	2.05319	7.70833	0.999094	胡搅蛮缠	103	51	52	46	22	24	胡搅蛮缠	133	46	胡	166.667	9	搅	16.5563	12	蛮	24.3479	12	缠	24.1118	13
605	虎落平阳	It was as though a tiger left his hills and descended to the plains	3.48936	1.36529	5.93617	1.25809	3.71429	1.84842	6.65306	1.92084	3.95652	1.49174	5.69565	1.29456	3.70833	1.60106	6.33333	1.57885	3.04167	1.08264	6.16667	1.20386	3.72	2.09205	6.96	2.18861	虎落平阳	47	23	24	49	24	25	虎落平阳	47	31	虎	76.5574	8	落	422.942	12	平	1603.12	5	阳	397.791	6
606	虎视眈眈	Look at fiercely as a tiger does	3.54762	1.20646	6.27381	1.17557	4.17021	2.02505	7	1.588	3.43478	1.25879	5.95652	1.29883	4.20833	2.22592	6.54167	1.97768	3.68421	1.14148	6.65789	0.87846	4.13043	1.84155	7.47826	0.845822	虎视眈眈	84	46	38	47	24	23	虎视眈眈	590	34	虎	76.5574	8	视	842.207	8	眈	1.71741	9	眈	1.71741	9
615	花花肠子	Cunning	2.93617	1.42041	6	1.588	5.06122	1.23167	6.63265	1.4244	2.86957	1.14035	5.43478	1.59049	5.2	1.22474	6.52	1.32665	3	1.66812	6.54167	1.41357	4.91667	1.24819	6.75	1.53934	花花肠子	47	23	24	49	25	24	花花肠子	19	24	花	625.91	7	花	625.91	7	肠	60.4217	7	子	3348.01	3
620	哗众取宠	Curry favour by claptrap	2.98	1.01484	6.13	1.03138	5.3	1.87628	7.32	1.23619	3.13725	1.02019	6.01961	1.12232	5.44	1.58325	6.92	1.28841	2.81633	0.993174	6.2449	0.924901	5.16	2.15407	7.72	1.06145	哗众取宠	100	51	49	50	25	25	哗众取宠	629	31	哗	12.9507	9	众	663.778	6	取	912.019	8	宠	26.1674	8
621	化公为私	Turn public property into private property	3.00971	1.5307	6.45631	1.2893	5.48936	1.70514	6.57447	1.76616	2.58	1.34149	6.62	1.2436	6.09091	1.37699	7.04545	1.13294	3.41509	1.59848	6.30189	1.32411	4.96	1.81384	6.16	2.11503	化公为私	103	50	53	47	22	25	化公为私	94	19	化	2003.07	4	公	2641.25	4	为	5620.72	4	私	224.845	7
623	画饼充饥	Feed on illusions	3.63636	1.1016	5.72727	1.16865	5.25	1.88778	7.17308	1.30941	3.68182	1.17053	5.22727	1.19251	4.85185	1.72546	6.85185	1.53682	3.59091	1.05375	6.22727	0.922307	5.68	1.99416	7.52	0.918332	画饼充饥	44	22	22	52	27	25	画饼充饥	95	28	画	375.059	8	饼	28.8939	9	充	354.884	6	饥	12.4111	5
624	画蛇添足	Paint a snake with feet -- superfluous	3.32653	1.16168	5.71429	1.36931	5.61224	1.68098	7.36735	0.993602	3.2	1.29099	6.12	1.1299	5.66667	1.8098	7.20833	1.17877	3.45833	1.02062	5.29167	1.48848	5.56	1.58325	7.52	0.770281	画蛇添足	49	25	24	49	24	25	画蛇添足	254	37	画	375.059	8	蛇	26.9369	11	添	49.9981	11	足	543.77	7
626	话里带刺	Sting words	2.82075	1.16126	6.43396	1.23457	4.91489	2.06239	7.08511	1.21279	3.09615	1.37569	6.17308	1.21625	5	2.13201	6.65217	1.26522	2.55556	0.839287	6.68519	1.2104	4.83333	2.03591	7.5	1.02151	话里带刺	106	52	54	47	23	24	话里带刺	17	32	话	1185.64	8	里	2015.7	7	带	651.825	9	刺	133.557	8
633	荒郊野外	Wilderness	3.65957	1.23845	5.14894	1.68082	3.8125	1.57988	7.1875	1.28255	3.52	1.15902	5.08	1.6052	3.6087	1.67167	6.95652	1.06508	3.81818	1.33225	5.22727	1.79767	4	1.5	7.4	1.44338	荒郊野外	47	25	22	48	23	25	荒郊野外	110	33	荒	89.3849	9	郊	30.2697	8	野	186.695	11	外	2025.61	5
634	慌手慌脚	Blunder against	3.15909	0.986966	6.06818	1.22755	4.875	1.87509	7.08333	1.0883	3.36364	1.0486	5.68182	1.21052	5.34783	1.94489	6.95652	1.06508	2.95455	0.898532	6.45455	1.1434	4.44	1.73397	7.2	1.11803	慌手慌脚	44	22	22	48	23	25	慌手慌脚	16	39	慌	40.5326	12	手	1414.05	4	慌	40.5326	12	脚	176.832	11
636	惶然不安	Uneasy	3.27083	1.16216	6.16667	1.41922	4.39583	2.08071	6.54167	1.51529	3.12	1.05357	6.24	1.3626	4.29167	1.98865	6.33333	1.20386	3.43478	1.27301	6.08696	1.50493	4.5	2.20671	6.75	1.77544	惶然不安	48	25	23	48	24	24	惶然不安	7	34	惶	10.6086	12	然	1095.5	12	不	9822.27	4	安	1119.42	6
637	晃晃荡荡	Sticky	3.97917	1.13905	4.89583	1.24182	5.28571	1.55456	6.93878	1.23167	3.8	1.22474	4.88	1.33292	5.36	1.55134	6.64	1.43991	4.17391	1.02922	4.91304	1.16436	5.20833	1.58743	7.25	0.896854	晃晃荡荡	48	25	23	49	25	24	晃晃荡荡	59	38	晃	25.8054	10	晃	25.8054	10	荡	84.5185	9	荡	84.5185	9
638	晃晃悠悠	Wobbly	3.95745	1.14127	4.90426	1.24078	5.5	1.45865	7.1875	0.95997	3.79167	1.31807	5.125	1.03472	5.3913	1.3052	6.82609	0.777652	4.13043	0.919701	4.67391	1.41107	5.6	1.60728	7.52	1.00499	晃晃悠悠	47	24	23	48	23	25	晃晃悠悠	263	42	晃	25.8054	10	晃	25.8054	10	悠	38.1763	11	悠	38.1763	11
639	灰头土脸	To describe depression	3.2	0.894427	5.15556	1.24235	4.64583	1.60438	6.875	1.16006	3.2381	0.830949	5.28571	1.14642	4.5	1.7693	6.41667	1.1389	3.16667	0.963087	5.04167	1.33447	4.79167	1.444	7.33333	1.00722	灰头土脸	45	21	24	48	24	24	灰头土脸	159	25	灰	86.6652	6	头	1198.71	5	土	568.512	3	脸	196.834	11
644	悔不当初	Regret having done sth.	3.5102	1.04328	5.97959	1.50679	4.34694	1.77425	7.16327	1.14286	3.68	1.14455	5.84	1.65025	5.12	1.42361	6.76	1.16476	3.33333	0.916831	6.125	1.36135	3.54167	1.76879	7.58333	0.974308	悔不当初	49	25	24	49	25	24	悔不当初	73	27	悔	38.8493	10	不	9822.27	4	当	1983.76	6	初	400.347	7
645	悔恨交加	Mixed feelings of remorse and shame	3.37864	1.48929	6.48544	1.12776	4.6	1.95876	7.18	1.15511	3.78	1.54246	6.24	1.20475	5.16	1.81842	6.72	1.13725	3	1.3445	6.71698	1.00723	4.04	1.96808	7.64	0.994987	悔恨交加	103	50	53	50	25	25	悔恨交加	85	30	悔	38.8493	10	恨	59.7732	9	交	1106.25	6	加	1892.76	5
648	昏昏沉沉	Have dizzy spells	3.33333	1.34217	4.77083	1.41781	4.71154	1.66081	7.11538	1.00301	3.25	1.25974	4.70833	1.26763	4.77778	1.47631	6.88889	1.1209	3.41667	1.44212	4.83333	1.57885	4.64	1.86815	7.36	0.81035	昏昏沉沉	48	24	24	52	27	25	昏昏沉沉	805	30	昏	53.3105	8	昏	53.3105	8	沉	227.009	7	沉	227.009	7
649	昏昏迷迷	Obsessed with dizzy	3.61702	1.27779	4.91489	1.51557	4.21569	1.46032	7.2549	0.976589	3.54167	1.10253	5.20833	1.02062	4.51852	1.55342	7.25926	0.902671	3.69565	1.4596	4.6087	1.87663	3.875	1.2959	7.25	1.07339	昏昏迷迷	47	24	23	51	27	24	昏昏迷迷	45	34	昏	53.3105	8	昏	53.3105	8	迷	150.526	9	迷	150.526	9
650	昏昏欲睡	Feel sleepy	3.79167	1.14777	4.60417	1.72268	4.26	1.86055	7.44	1.0721	3.75	1.22474	4.75	1.72576	5.48	1.47535	6.92	1.07703	3.83333	1.09014	4.45833	1.74404	3.04	1.33791	7.96	0.789515	昏昏欲睡	48	24	24	50	25	25	昏昏欲睡	500	40	昏	53.3105	8	昏	53.3105	8	欲	119.715	11	睡	110.611	13
651	昏头转向	Dizzy turn	3.4434	1.00551	5.61792	1.23356	3.78723	1.3341	7.06383	1.22304	3.30909	1.10341	5.61818	1.22461	3.95652	1.29609	6.82609	0.984063	3.58824	0.875819	5.61765	1.25534	3.625	1.37722	7.29167	1.39811	昏头转向	106	55	51	47	23	24	昏头转向	51	27	昏	53.3105	8	头	1198.71	5	转	690.434	8	向	1061.38	6
654	混混沌沌	Chaos	3.44898	1.17369	5.38776	1.53862	4.45833	1.70054	6.5625	1.35122	3.52	1.26227	5.68	1.31403	4.30435	1.52061	6.47826	0.845822	3.375	1.09594	5.08333	1.71735	4.6	1.87083	6.64	1.70489	混混沌沌	49	25	24	48	23	25	混混沌沌	105	36	混	143.079	11	混	143.079	11	沌	1.7317	7	沌	1.7317	7
656	火烧眉毛	Extremely urgent	3.31915	1.49064	7.14894	1.31841	3.78	1.89833	7.34	1.1537	3.13043	1.68696	7	1.3817	3.92593	1.73041	7.03704	1.25519	3.5	1.28537	7.29167	1.26763	3.6087	2.10495	7.69565	0.926125	火烧眉毛	47	23	24	50	27	23	火烧眉毛	82	27	火	508.645	4	烧	118.51	10	眉	26.0245	9	毛	380.029	4
660	祸从口出	Curse from the mouth	3.04545	1.25669	6.29545	1.33955	4.89362	2.26729	7.38298	1.01195	3.2381	1.33809	5.90476	1.44585	5.21739	2.17332	7.08696	0.900154	2.86957	1.17954	6.65217	1.15242	4.58333	2.35753	7.66667	1.0495	祸从口出	44	21	23	47	23	24	祸从口出	60	23	祸	38.92	11	从	1375.11	4	口	1079.29	3	出	4757.26	5
661	祸从天降	Disaster comes	2.21154	0.982103	6.92308	1.3488	2.85106	2.07447	6.97872	1.72563	2.07843	1.05533	6.98039	1.61852	2.65217	2.01379	6.3913	1.99406	2.33962	0.897505	6.86792	1.03845	3.04167	2.15647	7.54167	1.21509	祸从天降	104	51	53	47	23	24	祸从天降	100	27	祸	38.92	11	从	1375.11	4	天	2247.5	4	降	324.115	8
664	鸡飞蛋打	Dead loss	3.06667	1.05313	6.13333	1.60397	4.71429	1.77951	6.91837	1.28836	3	1.1547	5.81818	1.81623	4.72	1.54164	6.8	1.08012	3.13043	0.967863	6.43478	1.34252	4.70833	2.0319	7.04167	1.48848	鸡飞蛋打	45	22	23	49	25	24	鸡飞蛋打	68	26	鸡	85.1377	7	飞	407.777	3	蛋	121.073	11	打	847.707	5
665	鸡飞狗跳	General turmoil	2.87234	1.05536	6.42553	1.49992	4.28571	1.56791	7.12245	1.12976	2.5	1.10335	6.33333	1.63299	3.79167	1.47381	6.625	1.09594	3.26087	0.864312	6.52174	1.3774	4.76	1.53514	7.6	0.957427	鸡飞狗跳	47	24	23	49	24	25	鸡飞狗跳	96	31	鸡	85.1377	7	飞	407.777	3	狗	47.5663	8	跳	125.752	13
666	鸡零狗碎	Bits and pieces	3.28571	1.13652	5.69388	1.32609	4.875	1.19618	6.29167	1.52927	3.28	1.17331	5.96	1.24097	4.79167	1.02062	5.66667	1.46456	3.29167	1.12208	5.41667	1.38051	4.95833	1.36666	6.91667	1.34864	鸡零狗碎	49	25	24	48	24	24	鸡零狗碎	43	41	鸡	85.1377	7	零	106.149	13	狗	47.5663	8	碎	66.4394	13
668	鸡鸣狗盗	Crow like a cock and snatch like a dog	2.70455	0.954294	6.34091	1.41328	4.80392	1.41449	6.54902	1.7699	2.56522	1.12112	6.26087	1.42118	4.76923	1.65669	6.07692	1.80938	2.85714	0.727029	6.42857	1.43427	4.84	1.1431	7.04	1.61967	鸡鸣狗盗	44	23	21	51	26	25	鸡鸣狗盗	70	34	鸡	85.1377	7	鸣	49.3565	8	狗	47.5663	8	盗	68.7869	11
669	鸡鸣犬吠	A place has a large population; hustle and bustle	3.6383	1.45102	5.6383	1.6074	4.18367	1.45306	6.77551	1.41812	3.56522	1.40861	5.52174	1.75472	3.625	1.52693	6.375	1.24455	3.70833	1.51741	5.75	1.48177	4.72	1.17331	7.16	1.49108	鸡鸣犬吠	47	23	24	49	24	25	鸡鸣犬吠	33	26	鸡	85.1377	7	鸣	49.3565	8	犬	15.4233	4	吠	0.555232	7
670	鸡犬升天	One person becomes famous and the whole family benefits	3.53191	1.88646	5.98936	1.56903	4.54348	1.79761	6.91304	1.17049	2.64	1.43991	6.12	1.9	4.45455	1.89554	6.86364	0.940894	4.54545	1.84461	5.84091	1.10611	4.625	1.73988	6.95833	1.36666	鸡犬升天	47	25	22	46	22	24	鸡犬升天	101	19	鸡	85.1377	7	犬	15.4233	4	升	244.461	4	天	2247.5	4
673	唧唧喳喳	Twitter	3.36957	0.996855	5.73913	1.04211	4.97917	1.76839	7.20833	1.18426	3.69565	0.97397	5.3913	0.891328	5.125	2.07076	6.79167	1.28466	3.04348	0.928256	6.08696	1.08347	4.83333	1.43456	7.625	0.923721	唧唧喳喳	46	23	23	48	24	24	唧唧喳喳	138	44	唧	4.20235	10	唧	4.20235	10	喳	5.15019	12	喳	5.15019	12
682	急急慌慌	Hurried and flurried	3.45652	0.780499	6	1.19257	5.02174	1.81951	7.21739	0.940757	3.47826	0.897956	5.73913	1.17618	5.73913	1.5141	6.82609	0.936734	3.43478	0.662371	6.26087	1.17618	4.30435	1.84477	7.6087	0.782718	急急慌慌	46	23	23	46	23	23	急急慌慌	22	42	急	256.014	9	急	256.014	9	慌	40.5326	12	慌	40.5326	12
683	疾风暴雨	Violent storm	3.90291	1.43154	6.20388	1.12336	2.72917	1.25035	7.4375	0.920366	4.27451	1.37227	6.07843	0.934733	2.5	1.21584	7.375	1.0135	3.53846	1.40673	6.32692	1.27911	2.95833	1.26763	7.5	0.834058	疾风暴雨	103	51	52	48	24	24	疾风暴雨	99	37	疾	64.7254	10	风	877.382	4	暴	159.942	15	雨	172.54	8
685	嫉贤妒能	Be jealous of the good and envious of the strong	2.70213	1.42821	6.06383	1.50945	4.97959	2.12613	6.87755	1.75158	2.79167	1.53167	5.91667	1.69184	5.16667	2.16025	6.58333	1.76725	2.6087	1.33958	6.21739	1.31275	4.8	2.12132	7.16	1.72434	嫉贤妒能	47	24	23	49	24	25	嫉贤妒能	79	38	嫉	5.40467	13	贤	10.8291	8	妒	6.76077	7	能	2883.75	10
686	挤挤挨挨	Hustling and jostling	3.44444	0.893297	5.6	1.30384	4.20833	1.80965	7	1.20283	3.40909	1.00755	5.40909	1.22121	5.25	1.77544	6.83333	1.12932	3.47826	0.790257	5.78261	1.38027	3.16667	1.12932	7.16667	1.27404	挤挤挨挨	45	22	23	48	24	24	挤挤挨挨	46	38	挤	47.4778	9	挤	47.4778	9	挨	25.0453	10	挨	25.0453	10
693	家贼难防	A thief in the family is difficult to detect.	2.90099	1.00504	6.50495	1.27768	3.73469	1.78857	7.04082	1.3988	3.15686	1.12022	6.21569	1.26986	4.28	1.92614	6.8	1.75594	2.64	0.802038	6.8	1.2289	3.16667	1.46456	7.29167	0.858673	家贼难防	101	51	50	49	25	24	家贼难防	16	36	家	3873.64	10	贼	34.6578	10	难	719.944	10	防	480.569	6
694	夹七夹八	Incoherent	3.55556	1.05649	5.31111	1.36219	4.82353	1.07156	5.76471	1.95538	3.6087	1.03305	5	1.2792	4.74074	1.02254	6.03704	1.48016	3.5	1.10195	5.63636	1.39882	4.91667	1.1389	5.45833	2.37705	夹七夹八	45	23	22	51	27	24	夹七夹八	39	16	夹	49.0864	6	七	238.784	2	夹	49.0864	6	八	368.864	2
695	假传圣旨	Deliver a false order	2.58696	1.30939	6.65217	1.68941	3.95833	1.90138	6.64583	1.7923	2.45455	1.405	6.36364	2.12794	3.92	1.99833	6.6	1.65831	2.70833	1.23285	6.91667	1.1389	4	1.83402	6.69565	1.9641	假传圣旨	46	22	24	48	25	23	假传圣旨	49	28	假	289.79	11	传	864.783	6	圣	68.2269	5	旨	29.4865	6
696	假冒伪劣	Counterfeit and shoddy	2.31111	1.20269	6.44444	2.04	4.08696	1.91863	7.30435	1.11295	2.31818	1.2868	6.13636	2.27398	4.34783	2.32787	6.91304	1.04067	2.30435	1.14554	6.73913	1.7893	3.82609	1.40299	7.69565	1.06322	假冒伪劣	45	22	23	46	23	23	假冒伪劣	5266	32	假	289.79	11	冒	100.707	9	伪	89.2835	6	劣	64.4913	6
699	嫁鸡随鸡	Advice to be contented with the man a woman has married	3.6383	1.22342	5.08511	1.4866	4.3617	1.78673	7.02128	1.3908	3.66667	1.20386	5	1.41421	4.6087	1.4058	6.65217	1.19121	3.6087	1.2699	5.17391	1.58551	4.125	2.09165	7.375	1.49819	嫁鸡随鸡	47	24	23	47	23	24	嫁鸡随鸡	64	38	嫁	34.9796	13	鸡	85.1377	7	随	474.528	11	鸡	85.1377	7
700	尖声尖气	Sharp tone	3.625	1.34678	5.97917	1.45119	5.51064	1.64015	7.10638	1.18384	3.83333	1.40393	5.70833	1.23285	5.91667	1.44212	7.125	0.946963	3.41667	1.28255	6.25	1.62186	5.08696	1.75585	7.08696	1.41142	尖声尖气	48	24	24	47	24	23	尖声尖气	72	23	尖	69.8096	6	声	768.616	7	尖	69.8096	6	气	1139.89	4
711	见财起意	Think of stealing on seeing sb.'s money	2.71028	1.14932	6.31776	1.35004	5.42593	1.85921	7.2037	1.15546	2.37736	1.21254	6.49057	1.53951	5.41379	1.84231	6.86207	1.27403	3.03704	0.989815	6.14815	1.12279	5.44	1.91659	7.6	0.866025	见财起意	107	53	54	54	29	25	见财起意	42	34	见	1255.38	4	财	387.507	7	起	2047.96	10	意	1962.75	13
712	见风转舵	Temporization	3.15094	1.21728	6.00943	1.28356	5.42553	1.83853	7.12766	0.991639	3.07407	1.30097	5.90741	1.36352	5.5	1.7693	6.875	1.1156	3.23077	1.13094	6.11538	1.19892	5.34783	1.94489	7.3913	0.782718	见风转舵	106	54	52	47	24	23	见风转舵	41	27	见	1255.38	4	风	877.382	4	转	690.434	8	舵	5.04608	11
727	娇声娇气	Speak in a seductive tone	3.82979	1.49374	5.29787	1.80476	5.53191	1.71757	7.12766	1.36122	3.95652	1.26053	5.30435	1.57926	5.66667	1.46456	6.83333	0.963087	3.70833	1.70623	5.29167	2.0319	5.3913	1.97114	7.43478	1.64665	娇声娇气	47	23	24	47	24	23	娇声娇气	48	29	娇	18.4451	9	声	768.616	7	娇	18.4451	9	气	1139.89	4
729	骄奢淫逸	Pride luxury	2.47917	1.41406	7.08333	1.49941	4.69231	1.86336	6.34615	2.19522	2.20833	1.35066	7.29167	1.57367	4.92593	1.92005	5.74074	2.42729	2.75	1.45213	6.875	1.42379	4.44	1.80462	7	1.73205	骄奢淫逸	48	24	24	52	27	25	骄奢淫逸	250	42	骄	13.6746	9	奢	7.497	11	淫	11.1305	11	逸	7.73039	11
732	叫叫嚷嚷	Yell	3.13043	1.20386	6.13043	1.18526	5.32653	1.80725	7.32653	1.10657	3.54545	1.26217	5.68182	1.17053	5.79167	1.66757	7.125	1.191	2.75	1.03209	6.54167	1.06237	4.88	1.85562	7.52	1.00499	叫叫嚷嚷	46	22	24	49	24	25	叫叫嚷嚷	45	50	叫	301.732	5	叫	301.732	5	嚷	20.4694	20	嚷	20.4694	20
738	节哀顺变	Restrain one's grief and accord with inevitable changes	3.39216	1.38705	5.88235	1.24514	4.3	2.09226	7.18	1.10083	4.02041	1.42141	5.61224	0.953422	4.73077	2.01112	7.03846	0.773603	2.81132	1.07519	6.13208	1.42826	3.83333	2.11961	7.33333	1.37261	节哀顺变	102	49	53	50	26	24	节哀顺变	19	31	节	631.945	5	哀	19.8346	9	顺	192.321	9	变	1060.95	8
739	节节败退	Retreats	2.955	1.15491	6.33	1.3413	3.37778	1.52686	6.64444	1.38425	2.86538	1.31401	6.28846	1.51252	3.6087	1.77711	6.21739	1.31275	3.05208	0.957832	6.375	1.14157	3.13636	1.20694	7.09091	1.34196	节节败退	100	52	48	45	23	22	节节败退	425	27	节	631.945	5	节	631.945	5	败	206.25	8	退	248.337	9
742	解剖麻雀	Dissect a “sparrow” -- to analyse a typical case	3.73913	1.80659	5.78261	1.7245	5.5102	2.2091	6.30612	1.9494	4.68182	1.88696	5.68182	1.2868	5.25	1.91675	6.70833	1.36666	2.875	1.22696	5.875	2.07076	5.76	2.47117	5.92	2.34379	解剖麻雀	46	22	24	49	24	25	解剖麻雀	58	45	解	1248.17	13	剖	11.3033	10	麻	128.812	11	雀	9.93703	11
743	借酒浇愁	Drown one's sorrows in wine	3.34615	1.05912	5.875	1.16325	5.26531	2.20582	7.28571	1.22474	3.26923	1.05003	5.94231	1.24323	5.04167	2.21613	7.04167	0.999094	3.42308	1.07277	5.80769	1.08535	5.48	2.21961	7.52	1.38804	借酒浇愁	104	52	52	49	24	25	借酒浇愁	151	42	借	171.773	10	酒	253.867	10	浇	14.4388	9	愁	30.7535	13
752	紧急状态	State of emergency	4	1.31426	6.62222	1.35326	3.10417	1.6789	7.10417	1.2922	4.38095	1.32198	6.28571	1.23056	3.26087	1.62976	7	0.797724	3.66667	1.23945	6.91667	1.41165	2.96	1.74356	7.2	1.63299	紧急状态	45	21	24	48	23	25	紧急状态	871	34	紧	354.228	10	急	256.014	9	状	175.708	7	态	234.592	8
768	精神衰弱	Mental exhaustion	3.14894	1.06278	4.87234	1.60998	3.48	1.59387	6.9	1.40335	2.96	1.20692	4.84	1.59896	3.72	1.54164	6.64	1.15036	3.36364	0.847711	4.90909	1.65929	3.24	1.64012	7.16	1.59896	精神衰弱	47	25	22	50	25	25	精神衰弱	46	43	精	824.006	14	神	903.332	9	衰	29.9785	10	弱	142.186	10
773	酒池肉林	Extravagant orgy	3.11111	1.41778	6.42222	1.43794	4.8125	1.68417	5.52083	2.042	3.31818	1.67293	6.18182	1.33225	4.3913	1.4058	4.78261	1.41282	2.91304	1.12464	6.65217	1.5258	5.2	1.84842	6.2	2.3094	酒池肉林	45	22	23	48	23	25	酒池肉林	21	30	酒	253.867	10	池	72.6967	6	肉	163.063	6	林	572.211	8
775	酒肉朋友	Fair-weather friends	3.12745	1.22411	5.89216	1.289	5.26	1.70006	7.1	1.34392	3.16981	1.20473	5.64151	1.24181	5.04	1.42829	6.68	1.37598	3.08163	1.2556	6.16327	1.29658	5.48	1.93907	7.52	1.19443	酒肉朋友	102	53	49	50	25	25	酒肉朋友	101	28	酒	253.867	10	肉	163.063	6	朋	134.63	8	友	481.856	4
776	酒色财气	Wine, women, avarice and pride -- the four cardinal vices	3.375	1.17826	5.625	1.77002	5	1.5253	6.4	1.6413	3.41667	1.21285	5.70833	1.62799	5.48	1.5308	6.52	1.35769	3.33333	1.16718	5.54167	1.93321	4.52	1.38804	6.28	1.90438	酒色财气	48	24	24	50	25	25	酒色财气	58	27	酒	253.867	10	色	949.075	6	财	387.507	7	气	1139.89	4
779	旧恨新仇	New hatred piled on old	3.00943	1.16697	6.5566	1.30989	4.16667	1.91671	6.91667	1.47076	3.01887	1.3372	6.49057	1.40907	4.41667	1.95419	6.79167	1.17877	3	0.980581	6.62264	1.21254	3.91667	1.88626	7.04167	1.73153	旧恨新仇	106	53	53	48	24	24	旧恨新仇	18	31	旧	200.293	5	恨	59.7732	9	新	2264.38	13	仇	43.8783	4
782	拘拘束束	Binding bundles	3.67391	0.895776	5.06522	1.34002	4.38776	1.95593	7.14286	0.978945	3.77273	1.02036	4.77273	1.37778	4.91667	1.81579	6.70833	0.624094	3.58333	0.775532	5.33333	1.27404	3.88	1.98578	7.56	1.08321	拘拘束束	46	22	24	49	24	25	拘拘束束	21	30	拘	19.361	8	拘	19.361	8	束	199.093	7	束	199.093	7
785	举止失措	Chokeable	3.48485	0.884834	5.71717	1.01056	4.81633	1.71602	6.95918	1.3988	3.64	0.851409	5.48	0.99468	5.23077	1.47804	6.76923	1.42289	3.32653	0.89879	5.95918	0.978076	4.34783	1.87347	7.17391	1.37021	举止失措	99	50	49	49	26	23	举止失措	32	29	举	604.275	9	止	452.687	4	失	590.556	5	措	95.3755	11
786	拒人千里	Unapproachable	3.02222	1.37327	6.02222	1.54462	6.04167	2.08294	7.1875	1.70925	3.14286	1.42428	5.90476	1.22085	6.26087	1.76371	7.13043	1.01374	2.91667	1.34864	6.125	1.80127	5.84	2.35726	7.24	2.1848	拒人千里	45	21	24	48	23	25	拒人千里	50	19	拒	87.4164	7	人	10357.8	2	千	319.798	3	里	2015.7	7
787	据为己有	Take forcible possession of	3.06731	1.26387	6.13462	1.19917	6.70833	1.35204	7.29167	1.21967	2.87037	1.24455	5.96296	1.34533	6.5	1.50362	7.08333	1.34864	3.28	1.26233	6.32	0.998775	6.91667	1.17646	7.5	1.06322	据为己有	104	54	50	48	24	24	据为己有	837	24	据	811.425	11	为	5620.72	4	己	584.618	3	有	8648.03	6
806	客死他乡	Die abroad	2.57692	1.12079	6.54808	1.33569	3.29167	1.82137	6.91667	1.67374	2.66667	1.18162	6.40741	1.33909	3.83333	1.83366	6.375	1.71471	2.48	1.05444	6.7	1.32865	2.75	1.67462	7.45833	1.47381	客死他乡	104	54	50	48	24	24	客死他乡	62	23	客	488.493	9	死	481.523	6	他	4232.98	5	乡	328.567	3
809	坑坑洼洼	Bumpy	3.86957	0.805776	5.08696	1.20786	4	1.5253	7.22	1.28238	3.82609	0.886883	5.08696	1.41142	3.76	1.76257	7.04	1.09848	3.91304	0.733178	5.08696	0.99604	4.24	1.23423	7.4	1.44338	坑坑洼洼	46	23	23	50	25	25	坑坑洼洼	366	32	坑	23.564	7	坑	23.564	7	洼	7.89777	9	洼	7.89777	9
810	口出怨言	Grumble	3.14706	0.958516	6.03922	0.866558	5.25	1.96241	7.16667	1.31008	3.30769	1.0392	5.96154	0.884763	5.41667	1.66594	6.91667	1.05981	2.98	0.844913	6.12	0.848528	5.08333	2.24416	7.41667	1.50121	口出怨言	102	52	50	48	24	24	口出怨言	57	24	口	1079.29	3	出	4757.26	5	怨	47.4649	9	言	674.584	7
814	口蜜腹剑	A cruel heart under the cover of sugar-coated words	2.40426	1.17324	6.80851	1.19124	4.31915	1.795	6.82979	1.32401	2.24	1.26754	7	1.25831	4.70833	1.78104	6.625	1.09594	2.59091	1.05375	6.59091	1.09801	3.91304	1.75585	7.04348	1.52191	口蜜腹剑	47	25	22	47	24	23	口蜜腹剑	85	39	口	1079.29	3	蜜	28.2257	14	腹	64.7063	13	剑	67.2818	9
816	枯枝败叶	Dead twigs and withered leaves	3.31915	1.02377	5.19149	1.24479	4.5	1.54193	7.04	1.12413	3.16	1.10604	5.16	1.43411	4.11538	1.60815	6.96154	1.21592	3.5	0.912871	5.22727	1.02036	4.91667	1.38051	7.125	1.03472	枯枝败叶	47	25	22	50	26	24	枯枝败叶	76	30	枯	28.0903	9	枝	57.9456	8	败	206.25	8	叶	201.762	5
817	哭哭啼啼	Weep and sob	2.61224	1.07657	6.30612	1.63559	4.92308	1.78057	7.32692	1.06128	2.44	1.04403	6.36	1.8	5	1.86052	7.22222	1.01274	2.79167	1.10253	6.25	1.48177	4.84	1.72434	7.44	1.12101	哭哭啼啼	49	25	24	52	27	25	哭哭啼啼	717	44	哭	68.2616	10	哭	68.2616	10	啼	3.13203	12	啼	3.13203	12
818	哭天喊地	Cry bitterly	2.63043	1.18056	6.30435	1.81193	4.40816	1.99915	7	1.3994	2.73913	1.32175	5.86957	2.15964	4.64	1.86815	6.88	1.20139	2.52174	1.03877	6.73913	1.28691	4.16667	2.14003	7.125	1.59653	哭天喊地	46	23	23	49	25	24	哭天喊地	26	32	哭	68.2616	10	天	2247.5	4	喊	72.485	12	地	4442.5	6
819	哭天抹泪	Wail and whine	2.93617	0.986964	5.87234	1.9067	4.97917	2.14862	7.0625	1.2784	3.04167	1.12208	5.20833	1.97768	5.33333	2.20013	7.08333	0.775532	2.82609	0.834058	6.56522	1.59049	4.625	2.08123	7.04167	1.65448	哭天抹泪	47	24	23	48	24	24	哭天抹泪	46	30	哭	68.2616	10	天	2247.5	4	抹	22.4665	8	泪	87.0932	8
820	苦大仇深	Have suffered bitterly in the old society and have a deep class hatred	2.96	1.28645	6.42	1.37936	4.04167	1.91254	6.95833	1.87887	3.1	1.46036	6.48	1.38858	4.25	2.21163	6.75	2.00543	2.82	1.08214	6.36	1.38151	3.83333	1.57885	7.16667	1.76109	苦大仇深	100	50	50	48	24	24	苦大仇深	76	26	苦	332.425	8	大	6744.01	3	仇	43.8783	4	深	665.861	11
821	苦海无边	Boundless bitternesss	3.28571	1.25357	5.66667	1.71345	3.5625	1.78536	6.79167	1.67533	3.03774	1.30033	5.75472	1.94052	3.76	1.85472	6.28	2.05183	3.53846	1.16251	5.57692	1.45987	3.34783	1.72175	7.34783	0.884652	苦海无边	105	53	52	48	25	23	苦海无边	51	27	苦	332.425	8	海	1315.95	10	无	1828.92	4	边	577.86	5
825	夸下海口	Exaggerate the mouth of the sea	3.85714	1.36931	5.46939	1.41572	5.36735	1.82225	7.04082	1.45715	3.88	1.36382	5.36	1.41067	5.25	1.84744	6.66667	1.711	3.83333	1.40393	5.58333	1.44212	5.48	1.82848	7.4	1.08012	夸下海口	49	25	24	49	24	25	夸下海口	96	22	夸	36.2242	6	下	2891.04	3	海	1315.95	10	口	1079.29	3
828	狂风恶浪	Fierce storm	2.61702	1.18969	6.38298	1.99514	2.54167	1.33621	7.39583	1.02604	2.47826	1.12288	5.86957	2.36075	2.58333	1.58572	7.25	1.03209	2.75	1.25974	6.875	1.454	2.5	1.06322	7.54167	1.02062	狂风恶浪	47	23	24	48	24	24	狂风恶浪	71	31	狂	87.3273	7	风	877.382	4	恶	188.285	10	浪	128.776	10
829	狂风怒号	A violent wind is howling	3.2	1.27208	6.58889	1.23991	2.85417	1.36817	7.08333	1.16388	3.04167	1.16018	6.20833	1.444	2.79167	1.61458	6.875	1.2959	3.38095	1.39557	7.02381	0.782243	2.91667	1.10007	7.29167	0.999094	狂风怒号	45	24	21	48	24	24	狂风怒号	44	25	狂	87.3273	7	风	877.382	4	怒	83.2733	9	号	427.306	5
832	拉帮结伙	Collude with	3.15217	1.21046	6	1.60555	5.26531	1.97669	6.91837	1.5253	2.91304	1.20276	6.30435	1.32921	5.28	2.24574	6.6	1.77951	3.3913	1.19617	5.69565	1.81996	5.25	1.70038	7.25	1.15156	拉帮结伙	46	23	23	49	25	24	拉帮结伙	65	32	拉	699.256	8	帮	227.157	9	结	1221.7	9	伙	145.707	6
835	拉下脸来	Pull down your face	3.29787	1.08176	5.6383	1.53829	5.41667	2.04037	7.25	1.08176	3.21739	1.16605	5.08696	1.70329	6.13043	1.6041	7.08696	1.04067	3.375	1.0135	6.16667	1.16718	4.76	2.20378	7.4	1.11803	拉下脸来	47	23	24	48	23	25	拉下脸来	35	29	拉	699.256	8	下	2891.04	3	脸	196.834	11	来	4682.8	7
839	狼烟四起	Warning signals of approaching enemy forces are seen on all sides	3.55319	1.52954	6.44681	1.65251	3.29167	1.77402	6.89583	1.20706	3.17391	1.37021	5.86957	1.98413	3.29167	1.73153	6.5	1.14208	3.91667	1.6129	7	1.02151	3.29167	1.85283	7.29167	1.16018	狼烟四起	47	23	24	48	24	24	狼烟四起	58	35	狼	27.4724	10	烟	168.283	10	四	747.386	5	起	2047.96	10
843	老不死的	Old farts	2.38298	1.20782	6.57447	1.99722	4.54	1.59348	6.84	1.4619	2.16667	1.20386	6.33333	2.38959	4.44	1.70978	6.4	1.73205	2.6087	1.19617	6.82609	1.49703	4.64	1.49666	7.28	0.979796	老不死的	47	24	23	50	25	25	老不死的	96	24	老	1102.08	6	不	9822.27	4	死	481.523	6	的	22796.5	8
844	老虎屁股	Sth. tetchy	3.97872	1.05273	5.65957	1.6455	3.61702	1.63592	7.02128	1.63507	3.79167	1.14129	5.5	1.47442	3.6087	1.72519	6.56522	1.80469	4.17391	0.936734	5.82609	1.82538	3.625	1.58286	7.45833	1.35066	老虎屁股	47	24	23	47	23	24	老虎屁股	101	29	老	1102.08	6	虎	76.5574	8	屁	13.4481	7	股	377.745	8
847	老泪横流	Be in tears (of an elderly person)	3.7551	1.7264	6.44898	1.24267	4.46154	1.84137	7.26923	1.17349	3.32	1.74929	6.48	1.44684	4.85714	2.17246	7.21429	1.28689	4.20833	1.61458	6.41667	1.01795	4	1.25109	7.33333	1.0495	老泪横流	49	25	24	52	28	24	老泪横流	36	39	老	1102.08	6	泪	87.0932	8	横	132.619	15	流	948.45	10
849	老弱残兵	Weak remnants	3.40196	0.957098	5.67647	1.1787	4.34043	1.72295	7.06383	0.964686	3.68	0.978128	5.58	1.12649	3.86957	1.74002	7.08696	0.99604	3.13462	0.863846	5.76923	1.23058	4.79167	1.61458	7.04167	0.954585	老弱残兵	102	50	52	47	23	24	老弱残兵	74	32	老	1102.08	6	弱	142.186	10	残	141.687	9	兵	551.831	7
853	老眼昏花	Dim-sighted from old age	3.55319	1.15737	5.19149	1.31278	3.53061	1.4734	7.42857	1.04083	3.6087	1.07615	5.21739	1.04257	3.68	1.54704	7.32	0.9	3.5	1.25109	5.16667	1.55106	3.375	1.40844	7.54167	1.17877	老眼昏花	47	23	24	49	25	24	老眼昏花	80	32	老	1102.08	6	眼	606.508	11	昏	53.3105	8	花	625.91	7
855	唠唠叨叨	Nagging	3.125	1.17826	5.70833	1.07106	4.8913	1.86462	7.3913	1.18281	3.24	1.0116	5.68	1.14455	5.26087	1.45282	6.78261	1.1264	3	1.3484	5.73913	1.00983	4.52174	2.1715	8	0.904534	唠唠叨叨	48	25	23	46	23	23	唠唠叨叨	486	30	唠	2.47677	10	唠	2.47677	10	叨	5.88914	5	叨	5.88914	5
860	泪痕斑斑	Tear stain	3.21905	1.12644	6.19048	1.14434	4.79167	1.38316	6.85417	1.14835	2.83019	1.17237	6.26415	1.16274	5.125	1.56906	6.875	0.797414	3.61538	0.932083	6.11538	1.13161	4.45833	1.10253	6.83333	1.43456	泪痕斑斑	105	53	52	48	24	24	泪痕斑斑	45	43	泪	87.0932	8	痕	13.4964	11	斑	36.6991	12	斑	36.6991	12
861	累死累活	Exhausted	3.30952	1.03863	5.93333	1.27299	3.95745	1.66756	7.25532	0.89608	3.25926	1.0848	5.83333	1.37017	4.30435	1.66337	6.86957	0.694416	3.36275	0.995381	6.03922	1.16552	3.625	1.63687	7.625	0.923721	累死累活	105	54	51	47	23	24	累死累活	53	37	累	115.726	11	死	481.523	6	累	115.726	11	活	1400.22	9
863	冷水浇头	A bitter disappointment	3.39362	1.48154	6.07447	1.17944	4.91837	2.19694	7.14286	1.25831	3.2	1.25831	6.32	1.1804	4.80769	2.0595	7.07692	0.97665	3.61364	1.70386	5.79545	1.14079	5.04348	2.38324	7.21739	1.53613	冷水浇头	47	25	22	49	26	23	冷水浇头	23	25	冷	210.839	7	水	1535.76	4	浇	14.4388	9	头	1198.71	5
864	冷言冷语	Mocking words	2.96296	0.956297	5.76852	1.51384	4.4	1.73729	7.33333	1.066	3.01852	0.980773	5.81481	1.28964	5	1.90693	6.86957	1.01374	2.90741	0.937047	5.72222	1.72021	3.77273	1.30683	7.81818	0.906924	冷言冷语	108	54	54	45	23	22	冷言冷语	160	30	冷	210.839	7	言	674.584	7	冷	210.839	7	语	255.897	9
865	冷眼相待	Silent	3.11321	1.08075	6.13208	1.13872	4.95833	1.95653	7.3125	1.1328	3.37037	1.20214	6.03704	1.08093	6	1.41421	7	1.25109	2.84615	0.871884	6.23077	1.19829	3.91667	1.88626	7.625	0.923721	冷眼相待	106	54	52	48	24	24	冷眼相待	29	36	冷	210.839	7	眼	606.508	11	相	1565.14	9	待	326.983	9
866	冷眼相看	Look coldly upon	3.23077	1.08145	5.74038	1.38645	5.3125	1.81197	7.22917	0.972813	3.62264	1.16399	5.30189	1.51385	5.43478	1.59049	7	0.797724	2.82353	0.817457	6.19608	1.0774	5.2	2.02073	7.44	1.08321	冷眼相看	104	53	51	48	23	25	冷眼相看	37	36	冷	210.839	7	眼	606.508	11	相	1565.14	9	看	1369.26	9
867	愣头愣脑	Reckless	3.82979	1.52257	5.53191	1.45738	4.71739	1.6147	7.17391	0.995643	3.52174	1.27456	5.69565	1.42812	4.6087	1.55911	6.69565	0.76484	4.125	1.70198	5.375	1.49819	4.82609	1.69631	7.65217	0.982052	愣头愣脑	47	23	24	46	23	23	愣头愣脑	55	39	愣	8.35502	12	头	1198.71	5	愣	8.35502	12	脑	314.9	10
868	离愁别绪	Parting grief	3.52273	1.10997	5.90909	0.984016	4.54167	1.86751	7.125	1.2484	3.34783	1.22877	5.82609	1.19286	5.25	1.67462	6.5	1.21584	3.71429	0.956183	6	0.707107	3.83333	1.8098	7.75	0.944089	离愁别绪	44	23	21	48	24	24	离愁别绪	71	41	离	486.518	10	愁	30.7535	13	别	1182.98	7	绪	42.2916	11
869	离题万里	Completely off the point	3.21635	1.07207	5.65385	1.29051	4.76596	1.79629	6.48936	1.69234	2.98113	1.02827	5.60377	1.3059	5.24	1.87705	6.2	1.68325	3.46078	1.07165	5.70588	1.28521	4.22727	1.57153	6.81818	1.68003	离题万里	104	53	51	47	25	22	离题万里	43	35	离	486.518	10	题	1252.36	15	万	781.635	3	里	2015.7	7
873	力不胜任	Incompetent	3.82222	0.936359	5.48889	1.25449	4.55102	1.72072	6.69388	1.60992	4	0.83666	5.42857	1.20712	4.84	1.65025	6.6	1.47196	3.66667	1.00722	5.54167	1.31807	4.25	1.77544	6.79167	1.76879	力不胜任	45	21	24	49	25	24	力不胜任	106	21	力	2285.95	2	不	9822.27	4	胜	327.989	9	任	1254.12	6
888	两次三番	Again and again	3.91837	1.15175	5.38776	1.23855	5.36735	1.62908	6.77551	1.12297	4.16	0.943398	5.32	0.945163	5.20833	1.53167	6.625	0.923721	3.66667	1.30773	5.45833	1.50302	5.52	1.73494	6.92	1.28841	两次三番	49	25	24	49	24	25	两次三番	21	28	两	1025.77	7	次	1204.15	6	三	1255.48	3	番	74.2188	12
890	两面三刀	Act one way to sb.'s face and another behind his back	2.54902	1.00126	6.41176	1.30765	4.38298	1.70106	7.04255	1.10252	2.42	0.970798	6.32	1.63433	4.875	1.59653	6.70833	0.999094	2.67308	1.02366	6.5	0.896617	3.86957	1.68696	7.3913	1.11759	两面三刀	102	50	52	47	24	23	两面三刀	97	21	两	1025.77	7	面	2739.19	9	三	1255.48	3	刀	99.3886	2
895	踉踉跄跄	Stumble along	3.35417	0.837666	5.52083	1.30449	5.04	1.4563	7.06	1.23569	3.24	0.969536	5.56	1.41657	5.34615	1.46812	6.76923	1.36551	3.47826	0.665348	5.47826	1.20112	4.70833	1.39811	7.375	1.0135	踉踉跄跄	48	25	23	50	26	24	踉踉跄跄	540	50	踉	1.87527	14	踉	1.87527	14	跄	1.84669	11	跄	1.84669	11
896	潦潦草草	Scribble	3.21277	1.04124	5.04255	1.62798	5.72549	1.61342	7.17647	1.27602	3.13043	1.05763	5.04348	1.49174	5.96154	1.82166	7.23077	0.862911	3.29167	1.0417	5.04167	1.78104	5.48	1.35769	7.12	1.61555	潦潦草草	47	23	24	51	26	25	潦潦草草	60	48	潦	1.43299	15	潦	1.43299	15	草	267.558	9	草	267.558	9
901	临阵脱逃	Escape; fly in the face of danger	2.23913	1.05798	6.67391	1.76452	4.98	2.05526	7.1	1.21638	2.04545	0.843873	6.54545	1.79224	5.14815	1.79108	6.77778	1.36814	2.41667	1.21285	6.79167	1.76879	4.78261	2.35404	7.47826	0.897956	临阵脱逃	46	22	24	50	27	23	临阵脱逃	266	35	临	259.976	9	阵	176.741	6	脱	200.993	11	逃	106.295	9
911	令人寒心	Chilling	2.59091	0.947903	6.25	1.29624	3.85417	1.51573	7.0625	1.0191	2.56522	0.992063	6.08696	1.50493	4.2	1.63299	6.96	0.888819	2.61905	0.920662	6.42857	1.02817	3.47826	1.30974	7.17391	1.15413	令人寒心	44	23	21	48	25	23	令人寒心	83	23	令	489.012	5	人	10357.8	2	寒	91.5453	12	心	2318.57	4
912	溜须拍马	Fawn on	2.80851	1.55533	5.95745	1.99954	5.07692	1.72463	6.78846	1.79691	2.6087	1.67167	6	2.19504	4.7037	1.63648	7.07407	1.14105	3	1.44463	5.91667	1.83958	5.48	1.75879	6.48	2.29347	溜须拍马	47	23	24	52	27	25	溜须拍马	82	33	溜	26.032	13	须	456.986	9	拍	156.061	8	马	1026.99	3
915	流浪江湖	Move about the country without definite employment	3.97917	1.31262	5.20833	1.57045	5	2.03235	7.08511	1.44207	3.875	1.2959	5.375	1.27901	5	1.95402	6.73913	1.48377	4.08333	1.34864	5.04167	1.82921	5	2.14679	7.41667	1.34864	流浪江湖	48	24	24	47	23	24	流浪江湖	21	38	流	948.45	10	浪	128.776	10	江	603.051	6	湖	219.583	12
917	流落江湖	Live a vagabond life	3.65217	1.30328	5.65217	1.25109	4.10638	1.96971	6.87234	1.59642	3.21739	1.0853	5.69565	1.36298	3.73913	1.88818	6.47826	2.06419	4.08696	1.37883	5.6087	1.15755	4.45833	2.02117	7.25	0.84699	流落江湖	46	23	23	47	23	24	流落江湖	49	40	流	948.45	10	落	422.942	12	江	603.051	6	湖	219.583	12
920	六神不安	Worried about something	3.21739	0.98687	5.69565	1.45861	4.45833	1.94563	7.04167	0.988408	3.21739	1.04257	5.04348	1.63702	4.6087	1.72519	6.95652	0.975997	3.21739	0.951388	6.34783	0.884652	4.32	2.15484	7.12	1.01325	六神不安	46	23	23	48	23	25	六神不安	15	23	六	288.051	4	神	903.332	9	不	9822.27	4	安	1119.42	6
925	乱点鸳鸯	Cause an exchange of partners by mistake between two couples engaged to marry	2.93617	1.35782	6.34043	1.33964	4.66667	1.6927	6.875	1.36249	3	1.22474	5.88	1.26886	4.95652	1.60902	6.86957	0.868873	2.86364	1.52114	6.86364	1.24577	4.4	1.75594	6.88	1.71561	乱点鸳鸯	47	25	22	48	23	25	乱点鸳鸯	58	36	乱	203.363	7	点	1546.3	9	鸳	2.19507	10	鸯	2.18419	10
926	乱乱哄哄	In noisy disorder	2.91304	1.20786	5.97826	1.32479	4.26531	1.39606	7.10204	1.34234	2.96	1.30639	5.76	1.47986	4.72	1.45831	6.76	1.39284	2.85714	1.10841	6.2381	1.09109	3.79167	1.17877	7.45833	1.21509	乱乱哄哄	46	25	21	49	25	24	乱乱哄哄	22	32	乱	203.363	7	乱	203.363	7	哄	15.9745	9	哄	15.9745	9
927	乱说乱动	Be unruly in word or deed	3.11765	1.01761	5.90196	1.05783	5.61702	1.82439	7.38298	1.1142	3.38462	0.993189	5.69231	1.19703	5.65217	2.01379	7.26087	1.09617	2.84	0.976458	6.12	0.848528	5.58333	1.66594	7.5	1.14208	乱说乱动	102	52	50	47	23	24	乱说乱动	75	29	乱	203.363	7	说	2761.37	9	乱	203.363	7	动	3207.89	6
928	沦落风尘	Fall into prostitution	3.21905	1.18469	5.82857	1.49652	3.97959	1.92018	6.44898	1.80348	2.90385	1.20879	5.90385	1.49849	3.91667	1.97631	6.08333	1.95419	3.5283	1.08493	5.75472	1.50519	4.04	1.90351	6.8	1.60728	沦落风尘	105	52	53	49	24	25	沦落风尘	47	29	沦	7.10235	7	落	422.942	12	风	877.382	4	尘	28.7632	6
932	落荒而走	Plunge into the wilds and flee	3.04167	1.27092	6	1.51587	4.11538	1.75626	6.90385	1.52444	2.68	1.10755	5.92	1.35154	4.28571	1.67458	6.46429	1.50264	3.43478	1.34252	6.08696	1.70329	3.91667	1.86307	7.41667	1.41165	落荒而走	48	25	23	52	28	24	落荒而走	36	34	落	422.942	12	荒	89.3849	9	而	2283.95	6	走	731.55	7
943	骂骂咧咧	Be foul-mouthed; speak dirty words	2.66667	1.02247	6.26667	1.48324	5.13725	1.84412	7.41176	1.00352	2.81818	1.09702	5.95455	1.67552	4.85185	1.95534	7.14815	0.907393	2.52174	0.947224	6.56522	1.23679	5.45833	1.69344	7.70833	1.0417	骂骂咧咧	45	22	23	51	27	24	骂骂咧咧	250	36	骂	44.4689	9	骂	44.4689	9	咧	3.26675	9	咧	3.26675	9
945	卖弄聪明	Appear clever	3.02128	1.09325	5.7234	1.66423	5.23529	1.6922	7.07843	1.11073	2.82609	0.984063	5.56522	1.64665	4.92593	1.61545	6.88889	1.01274	3.20833	1.17877	5.875	1.70198	5.58333	1.74248	7.29167	1.19707	卖弄聪明	47	23	24	51	27	24	卖弄聪明	81	38	卖	240.384	8	弄	94.0146	7	聪	24.8745	15	明	1782.89	8
948	满脸横肉	Full face	2.66019	0.965619	6.15534	1.16953	4.28571	1.58114	6.42857	1.77951	2.54717	0.952043	6.03774	1.15961	4.08333	1.50121	6.29167	1.89918	2.78	0.974993	6.28	1.17872	4.48	1.66132	6.56	1.68523	满脸横肉	103	53	50	49	24	25	满脸横肉	77	45	满	524.571	13	脸	196.834	11	横	132.619	15	肉	163.063	6
950	满盘皆输	Lose the whole game	2.66981	1.11031	6.61321	1.22335	3.48936	1.86352	7.10638	1.4925	2.66038	1.23947	6.56604	1.37993	3.69565	1.8934	6.56522	1.77933	2.67925	0.97613	6.66038	1.05509	3.29167	1.85283	7.625	0.923721	满盘皆输	106	53	53	47	23	24	满盘皆输	83	46	满	524.571	13	盘	164.658	11	皆	55.939	9	输	226.237	13
952	慢慢腾腾	Slowly	3.51064	0.975178	5.07447	1.40642	5.5	1.71353	7.14583	1.14835	3.41667	1.05981	5.16667	1.30773	6	1.56038	7.25	0.73721	3.6087	0.891328	4.97826	1.52612	5	1.74456	7.04167	1.45898	慢慢腾腾	47	24	23	48	24	24	慢慢腾腾	103	54	慢	149.532	14	慢	149.532	14	腾	67.1784	13	腾	67.1784	13
953	慢慢吞吞	Slowly	3.64583	0.837666	5.0625	1.13749	5.72	1.7384	7.28	0.926701	3.48	0.87178	5	1.25831	6.16	1.59896	7.16	0.898146	3.82609	0.777652	5.13043	1.01374	5.28	1.79165	7.4	0.957427	慢慢吞吞	48	25	23	50	25	25	慢慢吞吞	88	42	慢	149.532	14	慢	149.532	14	吞	39.3194	7	吞	39.3194	7
957	莽莽撞撞	Reckless	3.40909	0.995763	5.75	1.08102	5.11538	1.73379	7.40385	0.913077	3.55	1.14593	5.7	0.656947	5.11111	1.76141	7.18519	0.878681	3.29167	0.858673	5.79167	1.35066	5.12	1.73973	7.64	0.907377	莽莽撞撞	44	20	24	52	27	25	莽莽撞撞	54	50	莽	4.15472	10	莽	4.15472	10	撞	50.8419	15	撞	50.8419	15
958	毛骨悚然	With one's hair standing on end	2.66667	0.998348	6.78431	1.22375	3.72	1.60408	6.96	1.33951	2.6	1.04978	6.62	1.30759	4.03846	1.58697	6.38462	1.41639	2.73077	0.952095	6.94231	1.12744	3.375	1.58286	7.58333	0.928611	毛骨悚然	102	50	52	50	26	24	毛骨悚然	1174	35	毛	380.029	4	骨	162.914	9	悚	2.08484	10	然	1095.5	12
959	毛手毛脚	Do things recklessly	3.63265	1.05463	5.7551	1.07103	5.09804	1.62794	7.45098	0.986179	3.56	0.916515	5.56	1.00333	5.38462	1.72225	7.23077	0.951113	3.70833	1.19707	5.95833	1.12208	4.8	1.5	7.68	0.988264	毛手毛脚	49	25	24	51	26	25	毛手毛脚	91	23	毛	380.029	4	手	1414.05	4	毛	380.029	4	脚	176.832	11
961	冒冒失失	Presumptuous	3.20833	0.988408	5.6875	1.29082	5.2449	1.61414	7.20408	1.07973	3.41667	1.01795	5.45833	1.53167	5.5	1.41421	6.54167	0.883627	3	0.932505	5.91667	0.974308	5	1.77951	7.84	0.85049	冒冒失失	48	24	24	49	24	25	冒冒失失	394	28	冒	100.707	9	冒	100.707	9	失	590.556	5	失	590.556	5
963	没大没小	Show no respect for elders	3.40426	1.34584	5.65957	1.6455	5.06122	1.50566	7.26531	1.15064	3.30435	1.10514	5.52174	1.47308	5.04167	1.70623	6.83333	1.0495	3.5	1.56038	5.79167	1.81729	5.08	1.32035	7.68	1.10755	没大没小	47	23	24	49	24	25	没大没小	74	20	没	1540.59	7	大	6744.01	3	没	1540.59	7	小	2135.97	3
964	没皮没脸	No skin and no face	2.6	1.00905	5.84444	1.9651	5.22917	1.69153	7.22917	1.15297	2.63636	1.0486	5.59091	2.15272	5.69565	1.52061	6.86957	1.01374	2.56522	0.992063	6.08696	1.78155	4.8	1.75594	7.56	1.19304	没皮没脸	45	22	23	48	23	25	没皮没脸	18	30	没	1540.59	7	皮	267.306	5	没	1540.59	7	脸	196.834	11
965	没轻没重	Rude	3.44681	0.995828	5.48936	1.12041	5.08	1.73605	7.26	1.22574	3.48	1.1225	5.4	1.1547	5.64	1.70489	7.32	1.06927	3.40909	0.854071	5.59091	1.09801	4.52	1.61038	7.2	1.38444	没轻没重	47	25	22	50	25	25	没轻没重	29	32	没	1540.59	7	轻	439.1	9	没	1540.59	7	重	1984.12	9
966	没上没下	Disrespectful	3.55556	1.03475	5.75556	1.04785	4.95918	1.56736	6.7551	1.66497	3.625	1.09594	5.875	0.946963	4.84	1.65025	6.8	1.1547	3.47619	0.980767	5.61905	1.16087	5.08333	1.50121	6.70833	2.09511	没上没下	45	24	21	49	25	24	没上没下	40	20	没	1540.59	7	上	5278.79	3	没	1540.59	7	下	2891.04	3
967	没头苍蝇	Headless fly; aimless fly	3.06383	1.24069	6.02128	1.71299	4.96078	1.62432	6.62745	1.52264	2.86957	1.25424	5.65217	1.72175	5.03846	1.28002	6.5	1.2083	3.25	1.22474	6.375	1.66322	4.88	1.94336	6.76	1.80924	没头苍蝇	47	23	24	51	26	25	没头苍蝇	43	33	没	1540.59	7	头	1198.71	5	苍	21.8446	7	蝇	4.23637	14
968	没着没落	Unsteady; unsure; anxious	3.46939	1.19202	5.65306	1.57521	4.30189	1.64767	7	1.30089	3.44	1.19304	5.72	1.6207	4.17241	1.5369	6.82759	1.28366	3.5	1.21584	5.58333	1.55806	4.45833	1.7932	7.20833	1.31807	没着没落	49	25	24	53	29	24	没着没落	70	37	没	1540.59	7	着	1666.35	11	没	1540.59	7	落	422.942	12
969	眉高眼低	Adopt different attitudes and measures under different circumstances	3.69565	1.07227	5.5	1.32916	5.20755	1.43257	6.24528	1.79642	3.91304	1.08347	5.17391	1.33662	4.85714	1.4836	6.42857	1.50132	3.47826	1.03877	5.82609	1.26678	5.6	1.29099	6.04	2.09125	眉高眼低	46	23	23	53	28	25	眉高眼低	13	37	眉	26.0245	9	高	2199.88	10	眼	606.508	11	低	394.867	7
974	每下愈况	Steadily deteriorate	3.40426	1.22757	5.46809	1.73018	4.1	1.58114	6.1	1.91929	3.41667	1.38051	5.125	1.70198	4.4	1.25831	5.88	1.78699	3.3913	1.07615	5.82609	1.7229	3.8	1.82574	6.32	2.05589	每下愈况	47	24	23	50	25	25	每下愈况	36	30	每	624.687	7	下	2891.04	3	愈	77.2209	13	况	293.815	7
976	闷声不语	Silence	3.63043	1.12267	4.8587	1.49318	5.5	1.78714	7.14	1.1954	3.32	1.10755	5.04	1.51327	5.48	1.63605	6.92	1.22202	4	1.04881	4.64286	1.476	5.52	1.96044	7.36	1.15036	闷声不语	46	25	21	50	25	25	闷声不语	7	27	闷	37.1829	7	声	768.616	7	不	9822.27	4	语	255.897	9
977	闷声闷气	Muffled	3.625	0.872309	5.21154	1.28979	5.32	1.51779	6.98	1.31692	3.92157	0.796069	5.13725	1.1139	5.36	1.57797	6.76	1.23423	3.33962	0.853576	5.28302	1.44618	5.28	1.48661	7.2	1.38444	闷声闷气	104	51	53	50	25	25	闷声闷气	82	25	闷	37.1829	7	声	768.616	7	闷	37.1829	7	气	1139.89	4
978	蒙昧无知	Ignorance	3.08333	0.985714	4.8125	1.84109	4.4898	1.8498	6.85714	1.48605	3.375	0.875388	4.75	1.51083	5.12	1.64114	6.32	1.4922	2.79167	1.02062	4.875	2.15311	3.83333	1.85722	7.41667	1.28255	蒙昧无知	48	24	24	49	25	24	蒙昧无知	48	34	蒙	184.874	13	昧	8.48158	9	无	1828.92	4	知	1298.23	8
981	蒙冤受屈	Unjustly aggrieved	2.38235	1.08129	7.02941	1.27003	3.25532	1.79937	7.04255	0.832948	2.5	1.19949	6.94	1.37633	3.45455	1.96946	7	0.816497	2.26923	0.952095	7.11538	1.16575	3.08	1.6563	7.08	0.862168	蒙冤受屈	102	50	52	47	22	25	蒙冤受屈	47	39	蒙	184.874	13	冤	21.369	10	受	972.326	8	屈	60.025	8
983	弥天大罪	Heinous crime	2.19417	1.19688	7.15534	1.41253	3.06	1.69525	6.6	1.6413	1.90385	1.19245	7.26923	1.6582	3.19231	1.8115	6.53846	1.42073	2.4902	1.13794	7.03922	1.11285	2.91667	1.58572	6.66667	1.88049	弥天大罪	103	52	51	50	26	24	弥天大罪	79	28	弥	18.7894	8	天	2247.5	4	大	6744.01	3	罪	315.23	13
984	迷离恍惚	Brown study	3.625	1.16006	5.39583	1.56748	4.25	1.70731	6.52083	1.70093	3.5	1.14208	5.25	1.70038	4.45833	1.8877	6.08333	1.83958	3.75	1.18872	5.54167	1.444	4.04167	1.51741	6.95833	1.45898	迷离恍惚	48	24	24	48	24	24	迷离恍惚	83	39	迷	150.526	9	离	486.518	10	恍	7.2847	9	惚	3.24974	11
985	迷迷糊糊	In a daze	3.7234	1.09747	5.23404	1.43273	4.83673	1.37457	7.36735	1.01435	3.56522	1.16096	5.21739	1.65025	5.125	1.454	7.04167	1.0417	3.875	1.03472	5.25	1.22474	4.56	1.26095	7.68	0.9	迷迷糊糊	47	23	24	49	24	25	迷迷糊糊	1139	48	迷	150.526	9	迷	150.526	9	糊	74.6488	15	糊	74.6488	15
986	迷迷茫茫	Obsessed with confusion	3.78261	1.09368	5.13043	1.30994	4.27451	1.29736	6.88235	1.14275	3.5	0.801784	4.86364	1.45718	4.57692	1.33186	6.61538	1.02282	4.04167	1.26763	5.375	1.13492	3.96	1.20692	7.16	1.21381	迷迷茫茫	46	22	24	51	26	25	迷迷茫茫	51	36	迷	150.526	9	迷	150.526	9	茫	15.8833	9	茫	15.8833	9
988	迷迷怔怔	Confused	3.47826	0.960072	5.04348	1.5196	4.98	1.68414	6.54	1.56766	3.47826	1.16266	4.91304	1.53484	5.08	1.55242	6.52	1.08474	3.47826	0.730477	5.17391	1.52709	4.88	1.83303	6.56	1.95959	迷迷怔怔	46	23	23	50	25	25	迷迷怔怔	13	34	迷	150.526	9	迷	150.526	9	怔	8.36795	8	怔	8.36795	8
992	绵里藏针	A ruthless character behind a gentle appearance	3.34783	1.6762	6.1087	1.46406	3.78	1.54246	6.58	1.69139	3.40909	1.89383	5.86364	1.55212	3.88462	1.50537	6.34615	1.74224	3.29167	1.48848	6.33333	1.37261	3.66667	1.60615	6.83333	1.63299	绵里藏针	46	22	24	50	26	24	绵里藏针	63	42	绵	16.6896	11	里	2015.7	7	藏	251.115	17	针	199.347	7
995	面红耳赤	Flush with shame	3.46809	1.26579	6.3617	1.32576	5.32653	1.83016	7.5102	0.981547	3.125	1.191	6.33333	1.16718	5.70833	1.87615	7.125	0.899879	3.82609	1.26678	6.3913	1.49967	4.96	1.74356	7.88	0.927362	面红耳赤	47	24	23	49	24	25	面红耳赤	779	28	面	2739.19	9	红	461.971	6	耳	161.511	6	赤	25.2059	7
996	面黄肌瘦	Sallow and emaciated	2.92683	0.905269	4.87805	1.72039	4.04545	1.8038	7.13636	1.39085	3.04545	1.0455	5.13636	1.55212	3.83333	1.46456	6.83333	1.49395	2.78947	0.713283	4.57895	1.8949	4.3	2.15455	7.5	1.19208	面黄肌瘦	41	22	19	44	24	20	面黄肌瘦	271	40	面	2739.19	9	黄	372.666	11	肌	21.5282	6	瘦	29.3253	14
997	面目皆非	Change completely in appearance	3.61224	1.56546	6.30612	1.31028	4.03922	1.62432	6.86275	1.40028	3.36	1.57797	5.96	1.33791	4.61538	1.79057	6.73077	1.15092	3.875	1.5411	6.66667	1.20386	3.44	1.19304	7	1.63299	面目皆非	49	25	24	51	26	25	面目皆非	42	31	面	2739.19	9	目	1386.17	5	皆	55.939	9	非	678.212	8
998	面如死灰	A white and bloodless complexion	2.85714	1.06001	5.72381	1.36927	3.88	1.52047	6.68	1.63433	2.94231	1.1447	5.75	1.34128	4.07692	1.32433	6.46154	1.55514	2.77358	0.973525	5.69811	1.40856	3.66667	1.711	6.91667	1.71735	面如死灰	105	52	53	50	26	24	面如死灰	103	27	面	2739.19	9	如	1955.83	6	死	481.523	6	灰	86.6652	6
1004	灭门之祸	Exterminate the whole family	1.80583	0.980779	7.40777	1.67119	2.71429	1.62019	7.06122	1.19736	1.60377	0.987219	7.37736	2.02129	2.96	1.92527	6.84	1.31276	2.02	0.936559	7.44	1.21487	2.45833	1.21509	7.29167	1.0417	灭门之祸	103	53	50	49	25	24	灭门之祸	24	21	灭	139.041	5	门	1206.79	3	之	2500.29	2	祸	38.92	11
1007	民穷财尽	The means of the people have been used up	2.57447	1.17482	6.42553	1.75381	3.30435	1.51833	6.30435	1.82415	2.6	1.25831	6.48	1.82848	3.30435	1.42812	6.26087	1.32175	2.54545	1.10096	6.36364	1.70561	3.30435	1.63581	6.34783	2.24841	民穷财尽	47	25	22	46	23	23	民穷财尽	103	25	民	2137.66	5	穷	83.3257	7	财	387.507	7	尽	407.054	6
1008	民生凋敝	People's livelihood depressed	3.42857	1.38444	5.97959	1.28273	3.7551	1.54826	5.89796	2.13351	3.64	1.46856	5.96	1.33791	3.96	1.42829	5.4	1.89297	3.20833	1.28466	6	1.25109	3.54167	1.66757	6.41667	2.28257	民生凋敝	49	25	24	49	25	24	民生凋敝	61	31	民	2137.66	5	生	4823.71	5	凋	1.60378	10	敝	0.85054	11
1019	明枪暗箭	Attack by overt and covert means	2.85417	1.27145	6.05208	1.39238	3.22449	1.53114	7.10204	1.26235	2.32	0.988264	6	1.80278	3.58333	1.83958	6.83333	1.30773	3.43478	1.30823	6.1087	0.768063	2.88	1.0924	7.36	1.18603	明枪暗箭	48	25	23	49	24	25	明枪暗箭	54	44	明	1782.89	8	枪	137.611	8	暗	149.673	13	箭	49.6416	15
1022	鸣冤叫屈	Complain about for justice	3.29787	1.19628	6.7234	1.33028	4.61224	1.92372	6.95918	1.04002	3.3913	1.43777	6.26087	1.48377	5.08333	1.86307	7	1.06322	3.20833	0.931533	7.16667	1.00722	4.16	1.90788	6.92	1.03763	鸣冤叫屈	47	23	24	49	24	25	鸣冤叫屈	82	31	鸣	49.3565	8	冤	21.369	10	叫	301.732	5	屈	60.025	8
1023	命赴黄泉	People died	2.69565	1.54732	6.47826	1.83472	2.82	1.85923	6.98	1.59706	2.81818	1.81623	6.22727	1.9744	3.15385	2.12964	7.11538	1.10732	2.58333	1.28255	6.70833	1.70623	2.45833	1.47381	6.83333	2.01444	命赴黄泉	46	22	24	50	26	24	命赴黄泉	32	37	命	1075.17	8	赴	55.0095	9	黄	372.666	11	泉	74.0657	9
1024	命在旦夕	Hold one's life on a precarious tenure	2.5814	1.29528	6.97674	1.55055	3.04082	2.06114	7.32653	1.08758	2.5	1.26303	6.86364	1.67034	3.15385	2.11078	7.03846	1.14824	2.66667	1.35401	7.09524	1.44585	2.91304	2.04302	7.65217	0.934622	命在旦夕	43	22	21	49	26	23	命在旦夕	73	22	命	1075.17	8	在	6592.4	6	旦	46.6184	5	夕	20.3823	3
1028	磨磨蹭蹭	Move slowly	3.08889	0.972864	5.8	1.61808	5.65385	1.88788	7.65385	0.860566	3.42857	0.87014	5.52381	0.813575	5.25	1.95552	7.28571	0.854493	2.79167	0.977093	6.04167	2.07426	6.125	1.72734	8.08333	0.653863	磨磨蹭蹭	45	21	24	52	28	24	磨磨蹭蹭	207	70	磨	85.8521	16	磨	85.8521	16	蹭	2.23522	19	蹭	2.23522	19
1029	磨破嘴皮	Wear the skin of the mouth	3.84783	0.918148	5.97826	1.27348	5.53191	1.96547	7.12766	1.03456	3.91304	0.733178	5.91304	1.08347	5.52	1.98158	6.96	1.05987	3.78261	1.0853	6.04348	1.46095	5.54545	1.9935	7.31818	0.994574	磨破嘴皮	46	23	23	47	25	22	磨破嘴皮	45	47	磨	85.8521	16	破	408.047	10	嘴	97.4276	16	皮	267.306	5
1032	莫名其妙	Confusing，for no reason	3.60976	0.833008	5.65854	1.06324	4.08333	1.66098	7.08333	1.16388	3.59091	0.666125	5.54545	0.9625	4.29167	1.82921	6.625	1.0135	3.63158	1.01163	5.78947	1.18223	3.875	1.48361	7.54167	1.14129	莫名其妙	41	22	19	48	24	24	莫名其妙	5384	31	莫	156.478	10	名	1361.14	6	其	1873.8	8	妙	86.3012	7
1033	漠不相关	Indifferent; entirely unrelated	3.74468	1.09282	5.06383	1.18696	5.14286	1.3994	7.04082	1.15396	3.75	1.15156	5.08333	1.01795	5.16667	1.30773	6.66667	1.0495	3.73913	1.05388	5.04348	1.36443	5.12	1.50886	7.4	1.1547	漠不相关	47	24	23	49	24	25	漠不相关	87	32	漠	28.3856	13	不	9822.27	4	相	1565.14	9	关	2202.44	6
1034	漠然视之	Indifferent to it	3.83019	1.19101	5.31132	1.41666	5.67347	1.74866	7.16327	1.0072	4.22222	1.25392	5.12963	1.13348	5.83333	1.49395	6.95833	0.750604	3.42308	0.977114	5.5	1.65091	5.52	1.98158	7.36	1.18603	漠然视之	106	54	52	49	24	25	漠然视之	97	35	漠	28.3856	13	然	1095.5	12	视	842.207	8	之	2500.29	2
1036	木头疙瘩	Wooden-head	3.91304	1.20786	5.43478	1.42442	4.95918	1.68275	6.91837	1.3203	3.6087	1.19617	5.26087	1.54383	4.20833	1.47381	6.33333	1.12932	4.21739	1.16605	5.6087	1.3052	5.68	1.57374	7.48	1.26227	木头疙瘩	46	23	23	49	24	25	木头疙瘩	23	31	木	274.901	4	头	1198.71	5	疙	2.52644	8	瘩	2.35293	14
1041	男盗女娼	Behave like thieves and prostitutes	1.95192	0.928302	7.125	1.30486	4.55769	1.68515	6.57692	1.64908	1.76923	0.920686	7.07692	1.36979	4.62963	1.9245	6.74074	1.53404	2.13462	0.908108	7.17308	1.24808	4.48	1.41774	6.4	1.77951	男盗女娼	104	52	52	52	27	25	男盗女娼	87	32	男	316.906	7	盗	68.7869	11	女	1009.76	3	娼	2.60673	11
1043	脑袋搬家	Head moving	2.26087	1.32388	6.76087	2.15184	3	1.88442	6.14	2.13819	2.04348	1.26053	6.43478	2.69387	2.8	1.95789	6.24	2.14631	2.47826	1.3774	7.08696	1.41142	3.2	1.82574	6.04	2.16949	脑袋搬家	46	23	23	50	25	25	脑袋搬家	32	44	脑	314.9	10	袋	71.6849	11	搬	51.6101	13	家	3873.64	10
1045	闹闹哄哄	Noisy	3.22449	1.06586	5.89796	1.53086	4.08163	1.4554	7.30612	1.02478	3.12	1.01325	5.84	1.49108	4.55556	1.5525	6.88889	1.01274	3.33333	1.12932	5.95833	1.60106	3.5	1.10195	7.81818	0.795006	闹闹哄哄	49	25	24	49	27	22	闹闹哄哄	18	34	闹	82.7868	8	闹	82.7868	8	哄	15.9745	9	哄	15.9745	9
1046	闹闹嚷嚷	Brawl	3.13333	1.30732	6.33333	1.41421	4.04348	1.64596	7.21739	1.07317	3.57143	1.32557	5.90476	1.51343	4.41667	1.79169	6.70833	1.08264	2.75	1.18872	6.70833	1.23285	3.63636	1.39882	7.77273	0.751622	闹闹嚷嚷	45	21	24	46	24	22	闹闹嚷嚷	70	56	闹	82.7868	8	闹	82.7868	8	嚷	20.4694	20	嚷	20.4694	20
1049	拈花惹草	Be promiscuous in sex relations; sleeping around	2.79412	1.18018	6.37255	1.15116	5.7551	1.86559	7.30612	1.06466	2.71698	1.08091	6.18868	1.11038	5.91667	2.04124	6.875	0.991814	2.87755	1.28505	6.57143	1.1726	5.6	1.70783	7.72	0.979796	拈花惹草	102	53	49	49	24	25	拈花惹草	88	36	拈	3.15312	8	花	625.91	7	惹	15.8364	12	草	267.558	9
1052	年老力衰	Aged and failing in strength	3.57143	1.1726	5.18367	1.46733	3	1.50177	7.29167	1.23699	3.64	1.11355	5.04	1.3687	3.04167	1.33447	7.33333	0.868115	3.5	1.25109	5.33333	1.57885	2.95833	1.68056	7.25	1.53934	年老力衰	49	25	24	48	24	24	年老力衰	71	24	年	5151.12	6	老	1102.08	6	力	2285.95	2	衰	29.9785	10
1053	年迈体弱	Be suffering from age and infirmity	3.60784	0.986612	5.13725	1.38621	3.12245	1.70334	7.22449	1.53114	3.75	0.910927	5.10417	1.05668	3.6	2	7.16	1.06771	3.48148	1.04142	5.16667	1.63396	2.625	1.1726	7.29167	1.92194	年迈体弱	102	48	54	49	25	24	年迈体弱	98	29	年	5151.12	6	迈	53.2322	6	体	2253.44	7	弱	142.186	10
1058	黏黏糊糊	Vacillating	3.39535	0.96136	5.32558	1.14215	4.82979	1.44942	7.02128	1.17009	3.56522	0.980979	5.13043	1.12761	4.79167	1.58743	6.75	1.32698	3.2	0.911465	5.55	1.13114	4.86957	1.32474	7.30435	0.926125	黏黏糊糊	86	46	40	47	24	23	黏黏糊糊	10	64	黏	1.21117	17	黏	1.21117	17	糊	74.6488	15	糊	74.6488	15
1059	蹑手蹑脚	Make one's way noiselessly to	3.93878	1.06865	4.95918	1.45715	5.54348	2.24803	7.34783	1.07945	4.2	1.25831	4.56	1.60935	5.21739	2.23518	7.21739	0.850482	3.66667	0.761387	5.375	1.1726	5.86957	2.26243	7.47826	1.27456	蹑手蹑脚	49	25	24	46	23	23	蹑手蹑脚	554	49	蹑	0.908377	17	手	1414.05	4	蹑	0.908377	17	脚	176.832	11
1061	牛皮大王	King of cowhide	3.08962	1.17675	5.92453	1.16044	5.01923	1.50151	6.94231	1.39204	2.92593	1.21083	5.87037	1.06481	5.11111	1.42325	6.77778	1.52753	3.25962	1.12673	5.98077	1.2601	4.92	1.6052	7.12	1.23558	牛皮大王	106	54	52	52	27	25	牛皮大王	33	16	牛	163.192	4	皮	267.306	5	大	6744.01	3	王	635.053	4
1062	牛头马面	Devils in animal forms	3.6875	1.18781	5.625	1.33089	4.45098	1.46032	6.45098	1.8581	3.58333	1.24819	5.45833	1.14129	4.07692	1.49461	6.23077	1.65669	3.79167	1.14129	5.79167	1.50302	4.84	1.34412	6.68	2.05589	牛头马面	48	24	24	51	26	25	牛头马面	64	21	牛	163.192	4	头	1198.71	5	马	1026.99	3	面	2739.19	9
1063	扭扭捏捏	Take mincing steps	3.42857	0.957427	5.20408	1.38413	5.38776	1.63065	7.18367	1.01393	3.56	0.960902	5.24	1.3	5.48	1.68622	6.72	0.979796	3.29167	0.954585	5.16667	1.49395	5.29167	1.60106	7.66667	0.816497	扭扭捏捏	49	25	24	49	25	24	扭扭捏捏	210	34	扭	40.2367	7	扭	40.2367	7	捏	12.4369	10	捏	12.4369	10
1064	忸忸怩怩	In an embarrassed manner	3.33333	1.05857	5.39583	1.39512	5.36	1.53543	6.82	1.54774	3.375	1.0135	5.125	1.07592	5.72	1.33915	6.92	1.22202	3.29167	1.12208	5.66667	1.63299	5	1.65831	6.72	1.83757	忸忸怩怩	48	24	24	50	25	25	忸忸怩怩	47	30	忸	0.48787	7	忸	0.48787	7	怩	0.48787	8	怩	0.48787	8
1065	浓烟滚滚	Heavy smoke rolling	3.08333	1.38123	6.0625	1.68101	3.80851	1.92961	7.23404	0.913968	2.88	1.39403	5.96	1.7195	3.79167	2.24537	7.33333	0.963087	3.30435	1.36298	6.17391	1.6693	3.82609	1.58551	7.13043	0.868873	浓烟滚滚	48	25	23	47	24	23	浓烟滚滚	330	45	浓	78.0714	9	烟	168.283	10	滚	54.9843	13	滚	54.9843	13
1066	浓妆艳抹	Put on gay clothing and powder one's face	3.93023	1.16282	5.60465	1.25621	6.375	1.46774	7.20833	1.28756	4.2	0.951453	5.6	0.598243	6.25	1.32698	6.875	1.2959	3.69565	1.29456	5.6087	1.64425	6.5	1.61515	7.54167	1.21509	浓妆艳抹	43	20	23	48	24	24	浓妆艳抹	242	33	浓	78.0714	9	妆	22.0365	6	艳	34.089	10	抹	22.4665	8
1068	怒火冲天	Surge of great fury	2.63208	1.2823	7.07547	1.37112	5.125	2.0999	7.41667	0.89522	2.60377	1.54844	7.07547	1.5793	5.04167	2.31214	7.29167	0.999094	2.66038	0.959635	7.07547	1.141	5.20833	1.91059	7.54167	0.779028	怒火冲天	106	53	53	48	24	24	怒火冲天	71	23	怒	83.2733	9	火	508.645	4	冲	255.455	6	天	2247.5	4
1069	怒气攻心	Very angry	2.58824	1.02786	6.93137	1.15407	4.2	2.12774	6.88889	1.33523	2.60784	1.13276	6.90196	1.33049	4.59091	1.99187	6.72727	1.24142	2.56863	0.922061	6.96078	0.958348	3.82609	2.22899	7.04348	1.4295	怒气攻心	102	51	51	45	22	23	怒气攻心	7	24	怒	83.2733	9	气	1139.89	4	攻	284.438	7	心	2318.57	4
1080	攀龙附凤	Serve an emperor and do service for a throne	4	2.04124	6.28571	1.36931	5.05882	1.72525	6.45098	1.87951	4.56	1.91659	6.36	0.994987	5.11538	1.65715	6.34615	1.64784	3.41667	2.04124	6.20833	1.69344	5	1.82574	6.56	2.12289	攀龙附凤	49	25	24	51	26	25	攀龙附凤	103	35	攀	27.2806	19	龙	254.841	5	附	207.838	7	凤	50.98	4
1086	咆哮如雷	In a thundering rage	2.6	1.38826	7.06667	1.48324	4.55102	2.18003	6.71429	1.8143	2.40909	1.14056	6.81818	1.70814	4.83333	2.4789	6.45833	2.08471	2.78261	1.59421	7.30435	1.22232	4.28	1.86011	6.96	1.51327	咆哮如雷	45	22	23	49	24	25	咆哮如雷	43	37	咆	1.46565	8	哮	3.54505	10	如	1955.83	6	雷	160.551	13
1091	蓬头散发	Shaggy hair	3.1087	1.19682	5.47826	1.60193	5.625	1.90883	7.125	1.08422	2.86364	1.24577	5.77273	1.23179	5.625	1.95187	7.08333	1.05981	3.33333	1.12932	5.20833	1.86452	5.625	1.9068	7.16667	1.12932	蓬头散发	46	22	24	48	24	24	蓬头散发	66	35	蓬	26.9852	13	头	1198.71	5	散	236.394	12	发	4277.54	5
1095	披麻戴孝	Mourning apparel	3.14486	1.48897	5.78972	1.81846	4.38776	2.07983	6.97959	1.37674	2.98182	1.4968	5.49091	2.10707	4.16667	2.20013	6.70833	1.23285	3.31731	1.47538	6.10577	1.40495	4.6	1.97906	7.24	1.47986	披麻戴孝	107	55	52	49	24	25	披麻戴孝	72	43	披	34.1829	8	麻	128.812	11	戴	75.3143	17	孝	8.89665	7
1098	偏听偏信	Listen to only one side	3.35417	1.37593	5.875	1.21384	4.47917	1.78635	6.8125	1.45363	3.08	1.18743	5.88	1.45258	4.875	1.9407	6.75	1.11316	3.65217	1.5258	5.86957	0.919701	4.08333	1.55806	6.875	1.75233	偏听偏信	48	25	23	48	24	24	偏听偏信	98	38	偏	106.143	11	听	477.837	7	偏	106.143	11	信	1302.01	9
1103	贫病交迫	Suffer from both poverty and sickness	2.46809	1.08048	6.21277	1.68027	3.06122	1.54661	7.14286	1.1726	2.3913	1.2699	5.73913	2.09366	3.32	1.43527	6.96	1.05987	2.54167	0.883627	6.66667	1.00722	2.79167	1.64129	7.33333	1.27404	贫病交迫	47	23	24	49	25	24	贫病交迫	68	32	贫	152.61	8	病	616.88	10	交	1106.25	6	迫	89.2972	8
1104	贫富悬殊	The disparity between the rich and the poor	2.82979	1.16692	6.46809	1.5583	3.64583	1.70718	7.29167	1.11008	2.83333	1.27404	6.33333	1.37261	3.5	1.56038	7.16667	0.916831	2.82609	1.07247	6.6087	1.75134	3.79167	1.86452	7.41667	1.28255	贫富悬殊	47	24	23	48	24	24	贫富悬殊	376	41	贫	152.61	8	富	380.93	12	悬	51.8428	11	殊	65.9039	10
1105	品头论足	Make frivolous remarks about sb.'s appearance	3.4375	1.2867	5.58333	1.47076	5.36735	1.94394	7.20408	1.0202	3.54167	1.28466	5.41667	1.38051	5.91667	1.44212	7.04167	0.80645	3.33333	1.30773	5.75	1.56733	4.84	2.2301	7.36	1.18603	品头论足	48	24	24	49	24	25	品头论足	389	27	品	1689.38	9	头	1198.71	5	论	1173.48	6	足	543.77	7
1119	婆婆妈妈	Garroulous and fussy	3.28571	1.02062	5.71429	1.62019	5	1.90185	7.16667	1.05857	3.28	0.890693	5.72	1.4	5.33333	1.55106	6.75	1.03209	3.29167	1.16018	5.70833	1.85283	4.66667	2.18028	7.58333	0.928611	婆婆妈妈	49	25	24	48	24	24	婆婆妈妈	372	34	婆	40.4734	11	婆	40.4734	11	妈	185.19	6	妈	185.19	6
1121	破窗而入	Burst open the window and get in	3.34804	1.30837	6.38725	1.06684	5.26531	2.05928	6.91837	1.82388	2.98039	1.25682	6.33333	1.1431	5.125	2.00678	6.58333	1.99819	3.71569	1.26592	6.44118	0.993212	5.4	2.14087	7.24	1.61452	破窗而入	102	51	51	49	24	25	破窗而入	60	30	破	408.047	10	窗	124.487	12	而	2283.95	6	入	1407.48	2
1123	破破烂烂	Ragged	3.3619	1.09302	5.51429	1.20188	4.74468	1.73792	7	1.30217	3.38462	1.17413	5.46154	1.25965	4.65217	1.43364	6.69565	1.06322	3.33962	1.01798	5.56604	1.15208	4.83333	2.01444	7.29167	1.45898	破破烂烂	105	52	53	47	23	24	破破烂烂	514	38	破	408.047	10	破	408.047	10	烂	48.5284	9	烂	48.5284	9
1124	破铜烂铁	Junk-heap	3.41304	1.14651	4.95652	1.60494	4.97959	1.88735	7.02041	1.36152	3.72727	1.3159	4.90909	1.23091	4.08333	1.63964	6.79167	1.41357	3.125	0.899879	5	1.91107	5.84	1.72434	7.24	1.3	破铜烂铁	46	22	24	49	24	25	破铜烂铁	113	40	破	408.047	10	铜	68.3977	11	烂	48.5284	9	铁	327.13	10
1125	破衣烂衫	Ragged	3.06383	1.09155	5.70213	1.53105	4.76471	1.96559	7.13725	1.28093	2.82609	1.26678	5.34783	1.79921	4.92593	2.0367	7.2963	0.992852	3.29167	0.858673	6.04167	1.16018	4.58333	1.90917	6.95833	1.5458	破衣烂衫	47	23	24	51	27	24	破衣烂衫	221	33	破	408.047	10	衣	137.2	6	烂	48.5284	9	衫	15.0763	8
1126	破绽百出	Loopholes appear one after another	3.47826	1.588	6.26087	1.14377	4.95918	1.94678	7.14286	1.30703	3.6087	1.97114	6.30435	1.14554	4.625	1.76469	6.83333	1.16718	3.34783	1.11227	6.21739	1.16605	5.28	2.09205	7.44	1.38684	破绽百出	46	23	23	49	24	25	破绽百出	81	32	破	408.047	10	绽	6.55596	11	百	560.83	6	出	4757.26	5
1134	七颠八倒	Be all at sevens and eights	3.28889	1.07919	5.91111	1.3284	4.61224	1.42619	6.46939	1.58248	3.04545	0.843873	6.04545	1.46311	4.83333	1.46456	6.5	1.14208	3.52174	1.23838	5.78261	1.20441	4.4	1.38444	6.44	1.93821	七颠八倒	45	22	23	49	24	25	七颠八倒	77	30	七	238.784	2	颠	29.0429	16	八	368.864	2	倒	242.688	10
1135	七拐八弯	Twisty	3.78261	0.940757	5.19565	1.39235	4.34615	1.38457	6.82692	1.43788	3.91667	0.928611	5.25	1.35935	4.37037	1.4451	6.81481	1.0755	3.63636	0.953463	5.13636	1.45718	4.32	1.34536	6.84	1.772	七拐八弯	46	24	22	52	27	25	七拐八弯	24	21	七	238.784	2	拐	18.3417	8	八	368.864	2	弯	41.9561	9
1137	七零八碎	Bits and pieces	3.46809	1.10042	5.2234	1.25892	5.10204	1.141	7	1.04083	3.08333	1.05981	5.375	1.24455	4.92	1.11505	6.84	1.02794	3.86957	1.01374	5.06522	1.28191	5.29167	1.16018	7.16667	1.0495	七零八碎	47	24	23	49	25	24	七零八碎	39	30	七	238.784	2	零	106.149	13	八	368.864	2	碎	66.4394	13
1138	七扭八歪	Crooked	3.28261	1.00362	5.63043	1.4041	4.97826	1.73191	6.95652	1.28161	3.36364	1.09307	5.72727	1.3159	4.63636	1.89097	6.86364	0.990212	3.20833	0.931533	5.54167	1.50302	5.29167	1.5458	7.04167	1.51741	七扭八歪	46	22	24	46	22	24	七扭八歪	45	20	七	238.784	2	扭	40.2367	7	八	368.864	2	歪	23.2034	9
1140	七窍生烟	Fulminate with anger	3.0625	1.22746	6.58333	1.14545	3.8	1.79569	6.26	1.90392	2.88	1.33292	6.6	1.25831	4.52	1.89561	5.88	1.9218	3.26087	1.09617	6.56522	1.03687	3.08	1.38203	6.64	1.84572	七窍生烟	48	25	23	50	25	25	七窍生烟	95	27	七	238.784	2	窍	4.1901	10	生	4823.71	5	烟	168.283	10
1142	七死八活	Almost dead	3.17391	1.3384	6.04348	1.39772	4.21277	1.44367	5.34043	2.24844	3.08333	1.44212	6.25	1.11316	4.04348	1.46095	6.17391	1.37021	3.27273	1.24142	5.81818	1.65145	4.375	1.43898	4.54167	2.63718	七死八活	46	24	22	47	23	24	七死八活	19	19	七	238.784	2	死	481.523	6	八	368.864	2	活	1400.22	9
1144	凄凄惨惨	Extremely miserable	2.71698	1.03053	6.24528	1.32242	4.35294	1.63491	6.90196	1.26894	2.46296	1.07656	6.48148	1.34221	4.2963	1.4362	6.62963	1.36292	2.98077	0.91802	6	1.26801	4.41667	1.86307	7.20833	1.10253	凄凄惨惨	106	54	52	51	27	24	凄凄惨惨	145	42	凄	8.77961	10	凄	8.77961	10	惨	49.6518	11	惨	49.6518	11
1145	凄凄惶惶	Despairing	3.15217	1.1149	5.69565	1.39634	3.6875	1.16977	6.41667	1.6221	3.17391	1.07247	5.3913	1.4058	4.21739	1.20441	6.30435	1.29456	3.13043	1.17954	6	1.3484	3.2	0.912871	6.52	1.89561	凄凄惶惶	46	23	23	48	23	25	凄凄惶惶	53	44	凄	8.77961	10	凄	8.77961	10	惶	10.6086	12	惶	10.6086	12
1146	凄然泪下	Sad tears	3.38298	1.17127	6.17021	1.40371	4.67347	1.94066	7.28571	1.04083	3.04348	1.10693	5.82609	1.6693	5.04	1.98914	7.08	0.909212	3.70833	1.16018	6.5	1.02151	4.29167	1.85283	7.5	1.14208	凄然泪下	47	23	24	49	25	24	凄然泪下	59	33	凄	8.77961	10	然	1095.5	12	泪	87.0932	8	下	2891.04	3
1148	欺男霸女	Bully the men and women	1.91667	0.985714	7.52083	1.2546	4.3125	2.06445	6.72917	1.84206	1.5	0.722315	8	0.978019	4.58333	2.04124	6.66667	1.78561	2.33333	1.0495	7.04167	1.33447	4.04167	2.09511	6.79167	1.93321	欺男霸女	48	24	24	48	24	24	欺男霸女	21	43	欺	50.2125	12	男	316.906	7	霸	40.1162	21	女	1009.76	3
1149	欺软怕硬	Bully the weak and fear the strong	2.49533	1.02215	6.53271	1.12701	4.74	1.94632	7.24	1.17038	2.51852	1.09442	6.33333	1.18162	5.16	2.07525	6.84	1.1431	2.4717	0.952805	6.73585	1.04054	4.32	1.74929	7.64	1.07548	欺软怕硬	107	54	53	50	25	25	欺软怕硬	74	40	欺	50.2125	12	软	172.047	8	怕	213.86	8	硬	112.985	12
1150	欺善怕恶	Impose upon those who are kind and fear those who are severe	2.06667	1.09545	7.08889	1.37877	4.93878	2.03519	7.2449	1.16423	2.19048	1.12335	6.85714	1.52597	4.875	2.00678	6.70833	1.0417	1.95833	1.08264	7.29167	1.23285	5	2.10159	7.76	1.05198	欺善怕恶	45	21	24	49	24	25	欺善怕恶	11	42	欺	50.2125	12	善	318.773	12	怕	213.86	8	恶	188.285	10
1151	嘁嘁喳喳	Chaos	3.45652	1.27726	5.5	1.26051	4.8125	1.49689	6.85417	1.35253	3.3913	1.19617	5.52174	1.27456	5.33333	1.30773	6.625	1.09594	3.52174	1.3774	5.47826	1.27456	4.29167	1.51741	7.08333	1.55806	嘁嘁喳喳	46	23	23	48	24	24	嘁嘁喳喳	260	52	嘁	0.368794	14	嘁	0.368794	14	喳	5.15019	12	喳	5.15019	12
1154	奇丑无比	Very ugly	2.95745	1.61457	6.29787	1.69289	3.94	1.68317	6.92	1.62682	3	1.70561	5.73913	1.8394	4.12	1.83303	6.4	1.63299	2.91667	1.55806	6.83333	1.37261	3.76	1.53514	7.44	1.47422	奇丑无比	47	23	24	50	25	25	奇丑无比	70	20	奇	294.162	8	丑	36.4943	4	无	1828.92	4	比	1091.32	4
1165	气势汹汹	In a threatening manner	2.94872	1.41326	7	1.10024	4.38636	2.20165	7.29545	1.09075	2.80952	1.43593	6.7619	0.768424	4.65217	2.32787	6.82609	1.11405	3.11111	1.40958	7.27778	1.36363	4.09524	2.07135	7.80952	0.813575	气势汹汹	39	21	18	44	23	21	气势汹汹	910	26	气	1139.89	4	势	267.427	8	汹	7.55552	7	汹	7.55552	7
1185	钱权交易	Money rights trade	2.61321	1.24649	6.68868	1.65824	4.23404	2.01314	6.87234	1.63677	2.27273	1.16197	6.49091	2.03554	4.78261	2.29538	6.30435	1.98711	2.98039	1.24081	6.90196	1.10009	3.70833	1.57367	7.41667	0.974308	钱权交易	106	55	51	47	23	24	钱权交易	69	30	钱	317.142	10	权	1179.26	6	交	1106.25	6	易	574.346	8
1188	强颜欢笑	Force a smile	3.48889	1.34202	6.06667	1.23215	5.44681	1.93153	7.19149	0.875718	3.59091	1.70878	6	1.30931	5.95833	1.70623	6.79167	0.779028	3.3913	0.891328	6.13043	1.17954	4.91304	2.04302	7.6087	0.782718	强颜欢笑	45	22	23	47	24	23	强颜欢笑	93	43	强	972.351	12	颜	34.6163	15	欢	332.901	6	笑	335.449	10
1189	抢班夺权	Seize power	2.55446	1.17877	6.79208	1.1689	4.52083	2.29699	6.35417	1.83917	2.08	1.02698	7.02	1.26958	4.65217	2.55145	6.78261	1.20441	3.01961	1.14	6.56863	1.02479	4.4	2.08167	5.96	2.22636	抢班夺权	101	50	51	48	23	25	抢班夺权	84	29	抢	89.9388	7	班	262.181	10	夺	146.877	6	权	1179.26	6
1190	巧言令色	Clever talk and an ingratiating manner	3.34043	1.04832	5.85106	1.47411	5.44898	1.56872	6.65306	1.64001	3.08696	1.16436	5.69565	1.69048	5.48	1.26227	6.2	1.63299	3.58333	0.880547	6	1.25109	5.41667	1.86307	7.125	1.5411	巧言令色	47	23	24	49	25	24	巧言令色	100	23	巧	102.487	5	言	674.584	7	令	489.012	5	色	949.075	6
1196	禽兽不如	Be worst than a beast	1.83721	0.974196	7.51163	1.22226	4	1.68523	7.21569	1.28552	1.89474	0.809303	7.10526	1.19697	4	1.90142	7.11111	1.42325	1.79167	1.10253	7.83333	1.16718	4	1.44463	7.33333	1.12932	禽兽不如	43	19	24	51	27	24	禽兽不如	83	33	禽	17.9682	12	兽	15.2158	11	不	9822.27	4	如	1955.83	6
1222	穷极无聊	Be utterly bored	3.34783	1.09985	5.41304	1.23964	4.36735	1.6033	6.10204	1.69859	3.13043	1.21746	5.82609	1.26678	4.41667	1.6129	5.875	1.72734	3.56522	0.945135	5	1.08711	4.32	1.62583	6.32	1.67631	穷极无聊	46	23	23	49	24	25	穷极无聊	64	29	穷	83.3257	7	极	626.876	7	无	1828.92	4	聊	42.2024	11
1223	穷年累月	Spend months and years	3.78261	1.20946	5.6087	1.23789	4.12245	1.48089	6	1.71998	3.69565	1.25896	5.52174	1.41001	4.25	1.53934	5.79167	1.444	3.86957	1.17954	5.69565	1.06322	4	1.44338	6.2	1.95789	穷年累月	46	23	23	49	24	25	穷年累月	50	28	穷	83.3257	7	年	5151.12	6	累	115.726	11	月	1839.86	4
1224	穷山恶水	Poor natural condition	3	1.05108	6.08491	1.13068	3.35294	1.70673	6.94118	1.31775	2.90566	1.16461	6.03774	1.14291	3.65385	1.97873	7.11538	1.10732	3.09434	0.925372	6.13208	1.12725	3.04	1.33791	6.76	1.50776	穷山恶水	106	53	53	51	26	25	穷山恶水	103	24	穷	83.3257	7	山	1013.65	3	恶	188.285	10	水	1535.76	4
1225	穷途潦倒	Desperate	2.84444	1.06506	5.77778	1.59386	3.91837	1.80089	6.97959	1.26639	2.56522	1.12112	5.82609	1.6693	3.95833	1.5458	6.41667	1.24819	3.13636	0.940894	5.72727	1.54863	3.88	2.04776	7.52	1.04563	穷途潦倒	45	23	22	49	24	25	穷途潦倒	41	42	穷	83.3257	7	途	85.4078	10	潦	1.43299	15	倒	242.688	10
1227	秋后算账	Settle accounts with sb. afterwards	2.97436	1.0879	6.51282	0.99662	4.71111	2.11727	7.15556	1.27841	2.80952	1.03049	6.42857	0.74642	4.56522	2.01869	6.82609	1.33662	3.16667	1.15045	6.61111	1.24328	4.86364	2.25294	7.5	1.14434	秋后算账	39	21	18	45	23	22	秋后算账	55	37	秋	142.529	9	后	2743.81	6	算	583.645	14	账	23.33	8
1232	屈打成招	Confess to false charges under torture	2.43478	1.12846	6.80435	1.82111	3.38298	1.89454	7.12766	1.09578	2.5	1.22474	6.40909	2.23945	3.04348	1.49174	6.65217	1.11227	2.375	1.05552	7.16667	1.27404	3.70833	2.19642	7.58333	0.880547	屈打成招	46	22	24	47	23	24	屈打成招	82	27	屈	60.025	8	打	847.707	5	成	3751.08	6	招	207.341	8
1233	趋炎附势	Fawn upon the rich and powerful persons	3.04348	1.33261	6.1087	1.33713	4.5625	1.71236	6.52083	1.78635	3.45455	1.405	5.81818	1.22032	4.54167	1.64129	5.75	2.00543	2.66667	1.16718	6.375	1.40844	4.58333	1.81579	7.29167	1.12208	趋炎附势	46	22	24	48	24	24	趋炎附势	253	35	趋	112.152	12	炎	35.3954	8	附	207.838	7	势	267.427	8
1243	全无心肝	Be dead to all feeling	2.8125	1.28255	5.85417	1.59773	4.42	1.40102	5.92	2.08826	2.56	1.26095	5.68	1.86458	4.8	1.60728	6.44	1.29357	3.08696	1.27611	6.04348	1.26053	4.04	1.05987	5.4	2.58199	全无心肝	48	25	23	50	25	25	全无心肝	49	21	全	2321.82	6	无	1828.92	4	心	2318.57	4	肝	44.6799	7
1245	缺斤短两	Bad business; short in weight	2.92308	1.22032	6.33654	1.02976	4.7	1.68123	7.32	1.18563	2.59615	1.12476	6.32692	1.02366	4.8	1.70783	7.08	0.996661	3.25	1.23471	6.34615	1.04571	4.6	1.68325	7.56	1.32539	缺斤短两	104	52	52	50	25	25	缺斤短两	270	33	缺	221.146	10	斤	70.5179	4	短	224.705	12	两	1025.77	7
1246	缺衣少食	Not have enough for food and clothing	3.02222	1.19637	6.04444	1.22392	3.68085	1.795	7.25532	0.943354	2.90909	1.23091	5.72727	1.42032	3.86957	1.6598	7.21739	1.04257	3.13043	1.17954	6.34783	0.934622	3.5	1.93368	7.29167	0.858673	缺衣少食	45	22	23	47	23	24	缺衣少食	59	29	缺	221.146	10	衣	137.2	6	少	1064	4	食	423.122	9
1250	群魔乱舞	Demons and monsters danced like mad	2.91304	1.51769	6.67391	1.57839	3.95918	1.55402	6.73469	1.33503	2.59091	1.29685	6.31818	1.86155	3.54167	1.64129	6.45833	1.28466	3.20833	1.66757	7	1.21584	4.36	1.38082	7	1.35401	群魔乱舞	46	22	24	49	24	25	群魔乱舞	48	54	群	482.108	13	魔	20.5266	20	乱	203.363	7	舞	227.017	14
1252	惹火烧身	Ask for trouble	2.82857	1.01391	6.42857	1.02711	3.82692	1.59314	7.01923	1.27557	2.69091	1.06931	6.30909	1.18435	4.25	1.69148	6.89286	1.25725	2.98	0.936559	6.56	0.812153	3.33333	1.34056	7.16667	1.30773	惹火烧身	105	55	50	52	28	24	惹火烧身	42	33	惹	15.8364	12	火	508.645	4	烧	118.51	10	身	1129.97	7
1258	人多手杂	Too many cooks spoil the broth	3.40426	1.03545	5.40426	1.24516	4.44898	1.37024	6.93878	1.19736	3.41667	1.1389	5.41667	1.01795	4.41667	1.05981	6.83333	1.0495	3.3913	0.940944	5.3913	1.46905	4.48	1.63605	7.04	1.33791	人多手杂	47	24	23	49	24	25	人多手杂	17	18	人	10357.8	2	多	2609.35	6	手	1414.05	4	杂	270.984	6
1263	人老珠黄	Getting old as if the pearl becoming yellow	3.36275	1.10614	5.56863	1.36802	3.14583	1.68838	6.8125	1.61977	3.71429	1.04083	5.20408	1.06026	3.08333	1.76725	6.58333	1.44212	3.03774	1.0735	5.90566	1.53503	3.20833	1.64129	7.04167	1.78104	人老珠黄	102	49	53	48	24	24	人老珠黄	103	29	人	10357.8	2	老	1102.08	6	珠	46.417	10	黄	372.666	11
1265	人穷志短	When a man is poor, his ambition is not far-reaching	2.74468	1.07275	5.40426	1.42432	4.78	1.8658	7.02	1.26958	2.72	1.24231	5.08	1.6052	5.44	1.63503	6.72	1.42945	2.77273	0.869144	5.77273	1.10978	4.12	1.87794	7.32	1.02956	人穷志短	47	25	22	50	25	25	人穷志短	39	28	人	10357.8	2	穷	83.3257	7	志	664.679	7	短	224.705	12
1267	人事纠纷	Interpersonal dispute	3.35294	1.17437	5.89216	1.17656	3.95652	1.45993	6.95652	1.26415	3.58824	1.11672	5.4902	1.1895	4.32	1.67631	6.8	1.38444	3.11765	1.1941	6.29412	1.02556	3.52381	1.03049	7.14286	1.10841	人事纠纷	102	51	51	46	25	21	人事纠纷	50	22	人	10357.8	2	事	2624.46	8	纠	71.2283	5	纷	91.1554	7
1271	忍饥挨饿	Hunger and starvation	2.87234	1.26176	6.10638	1.89087	4.09804	2.18408	7.23529	1.25838	2.6087	1.37309	5.78261	2.3151	4.60714	2.16606	7.25	1.2057	3.125	1.1156	6.41667	1.34864	3.47826	2.08609	7.21739	1.34693	忍饥挨饿	47	23	24	51	28	23	忍饥挨饿	378	32	忍	95.7626	7	饥	12.4111	5	挨	25.0453	10	饿	25.7441	10
1272	忍辱偷生	Live in dishonor	3.16667	1.31008	5.89583	1.44752	4.63265	1.94394	6.91837	1.18738	2.91667	1.41165	5.95833	1.60106	5.29167	1.85283	6.625	1.27901	3.41667	1.17646	5.83333	1.30773	4	1.84842	7.2	1.04083	忍辱偷生	48	24	24	49	24	25	忍辱偷生	32	33	忍	95.7626	7	辱	20.3095	10	偷	71.1255	11	生	4823.71	5
1273	认贼作父	Clasp an enemy to one's bosom	1.8	0.864566	7.32	1.38447	4.28	1.88485	6.72	1.77327	1.5	0.58346	7.375	1.57946	4.64	1.9975	6.64	1.52425	2.07692	0.987096	7.26923	1.19008	3.92	1.73013	6.8	2.02073	认贼作父	100	48	52	50	25	25	认贼作父	89	25	认	1074.87	4	贼	34.6578	10	作	4031.82	7	父	161.781	4
1282	柔肠寸断	Lovelorn	3.76087	1.59422	6.15217	1.4601	4.25	1.91855	6.70833	1.52927	3.31818	1.49241	5.68182	1.70116	4.47826	1.97414	6.47826	1.59173	4.16667	1.60615	6.58333	1.05981	4.04	1.88149	6.92	1.46969	柔肠寸断	46	22	24	48	23	25	柔肠寸断	56	30	柔	34.3639	9	肠	60.4217	7	寸	44.8303	3	断	527.891	11
1294	软硬不吃	Immune to both soft and hard tactics	3.68889	1.42737	6	0.977008	5.29167	1.94563	7.14583	0.922291	3.59091	1.43623	6.13636	0.774317	5.75	1.70038	7.08333	0.829702	3.78261	1.44463	5.86957	1.14035	4.83333	2.099	7.20833	1.02062	软硬不吃	45	22	23	48	24	24	软硬不吃	55	30	软	172.047	8	硬	112.985	12	不	9822.27	4	吃	273.555	6
1295	软硬兼施	Adopt every possible means, tough and soft	3.68889	1.45886	5.93333	1.25045	4.96078	2.10676	7.41176	1.31418	2.78261	1.1264	6.30435	1.25896	4.57692	2.00346	7.38462	1.02282	4.63636	1.1358	5.54545	1.1434	5.36	2.17715	7.44	1.58325	软硬兼施	45	23	22	51	26	25	软硬兼施	393	39	软	172.047	8	硬	112.985	12	兼	96.854	10	施	549.517	9
1302	三无产品	Three non products	2.72115	1.31796	6.43269	1.53765	4.1875	1.69676	7.08333	1.45622	2.90196	1.36022	6.29412	1.18818	4.25	1.53934	6.83333	1.40393	2.54717	1.26439	6.56604	1.81351	4.125	1.87228	7.33333	1.49395	三无产品	104	51	53	48	24	24	三无产品	64	22	三	1255.48	3	无	1828.92	4	产	3213.45	6	品	1689.38	9
1304	散散落落	Scattered about	3.91304	0.938701	4.95652	1.33261	5.06	1.47648	6.62	1.45532	3.875	1.07592	5.20833	1.41357	4.92	1.44106	6.72	1.13725	3.95455	0.785419	4.68182	1.21052	5.2	1.52753	6.52	1.73494	散散落落	46	24	22	50	25	25	散散落落	15	48	散	236.394	12	散	236.394	12	落	422.942	12	落	422.942	12
1305	丧子之痛	Bereavement of the son's pain	1.62245	0.879495	7.66327	1.19228	2.97917	2.03678	6.64583	1.91844	1.35417	0.699227	7.97917	1.15758	3.44	2.36432	6.52	1.91746	1.88	0.961292	7.36	1.15635	2.47826	1.50362	6.78261	1.95301	丧子之痛	98	48	50	48	25	23	丧子之痛	26	25	丧	34.0481	8	子	3348.01	3	之	2500.29	2	痛	230.662	12
1307	杀鸡取卵	Kill the goose that lays the golden eggs	2.98958	1.46043	6.01042	1.4677	5.20755	1.87451	7.07547	1.49163	2.84	1.24766	5.56	1.47422	4.60714	1.81229	6.75	1.48137	3.15217	1.67491	6.5	1.32288	5.88	1.73973	7.44	1.44568	杀鸡取卵	48	25	23	53	28	25	杀鸡取卵	102	28	杀	224.641	6	鸡	85.1377	7	取	912.019	8	卵	29.9676	7
1313	煽风点火	Fan the flames; stir up troubles	2.56522	1.20466	6.6087	1.25571	4.875	2.16967	7.08333	1.21748	2.30435	0.926125	6.3913	1.19617	5.08333	2.30154	6.91667	1.21285	2.82609	1.40299	6.82609	1.30217	4.66667	2.05715	7.25	1.22474	煽风点火	46	23	23	48	24	24	煽风点火	198	31	煽	9.21101	14	风	877.382	4	点	1546.3	9	火	508.645	4
1318	伤心惨目	Be grieved at seeing sth	2.91304	1.09191	6.23913	1.19601	4.12766	1.55503	6.21277	1.75618	2.73913	1.17618	6.17391	1.46636	4.52174	1.41001	6.08696	1.20276	3.08696	0.99604	6.30435	0.87567	3.75	1.62186	6.33333	2.18028	伤心惨目	46	23	23	47	23	24	伤心惨目	47	26	伤	275.565	6	心	2318.57	4	惨	49.6518	11	目	1386.17	5
1332	社会渣滓	Social scum	2.4	1.13618	6.51111	1.59006	4.39583	1.64691	6.75	1.6822	2.57143	1.16496	6.04762	1.88351	4.34783	1.11227	6.6087	1.37309	2.25	1.11316	6.91667	1.17646	4.44	2.04287	6.88	1.94336	社会渣滓	45	21	24	48	23	25	社会渣滓	86	38	社	1983.49	7	会	5204.67	6	渣	11.9171	12	滓	0.686556	13
1333	伸头探脑	Crane one's neck to watch	3.5	1.16692	5.35417	1.42156	5.65306	1.34708	7.04082	1.32223	3.36	0.95219	5.64	1.11355	5.54167	1.444	7.08333	0.717282	3.65217	1.36877	5.04348	1.66456	5.76	1.26754	7	1.73205	伸头探脑	48	25	23	49	24	25	伸头探脑	12	33	伸	90.3634	7	头	1198.71	5	探	197.214	11	脑	314.9	10
1334	身不由己	Involuntarily	3.09756	1.26105	5.85366	1.38854	3.78261	2.24017	7.5	1.04881	3.77273	1.066	5.36364	0.953463	4.08696	2.06514	7.17391	1.11405	2.31579	1.00292	6.42105	1.60955	3.47826	2.40963	7.82609	0.886883	身不由己	41	22	19	46	23	23	身不由己	837	19	身	1129.97	7	不	9822.27	4	由	1325.75	5	己	584.618	3
1337	深恶痛绝	Anathema	3.25	1.75683	6.63889	1.43037	5.02083	1.97311	7.29167	0.874176	3.2963	1.95834	6.42593	1.6552	4.45833	1.84106	7.125	0.850192	3.2037	1.54651	6.85185	1.13947	5.58333	1.97631	7.45833	0.883627	深恶痛绝	108	54	54	48	24	24	深恶痛绝	1302	42	深	665.861	11	恶	188.285	10	痛	230.662	12	绝	360.979	9
1341	神出鬼没	Come and go like a shadow	3.81633	1.43865	5.79592	1.69533	4.6875	1.80019	6.85417	1.14835	3.68	1.51987	5.96	1.20692	4.875	1.72734	6.625	1.0135	3.95833	1.36666	5.625	2.10202	4.5	1.88818	7.08333	1.24819	神出鬼没	49	25	24	48	24	24	神出鬼没	573	30	神	903.332	9	出	4757.26	5	鬼	87.8431	9	没	1540.59	7
1342	神经兮兮	Nerve-racking	3.32609	1.07609	5.69565	1.51833	4.69388	1.7819	7.04082	1.30638	3.26087	1.17618	5.3913	1.69864	4.72	1.69607	6.68	1.51987	3.3913	0.988071	6	1.2792	4.66667	1.90347	7.41667	0.928611	神经兮兮	46	23	23	49	25	24	神经兮兮	98	25	神	903.332	9	经	3714.01	8	兮	0.195964	4	兮	0.195964	4
1345	神使鬼差	Unexpected happening	3.95556	1.38097	5.42222	1.19637	3.5625	1.5424	6.375	1.80572	3.86364	1.45718	5.36364	1.1358	3.6087	1.69864	6.47826	1.12288	4.04348	1.3307	5.47826	1.27456	3.52	1.41774	6.28	2.28254	神使鬼差	45	22	23	48	23	25	神使鬼差	7	35	神	903.332	9	使	1355.82	8	鬼	87.8431	9	差	282.423	9
1347	生拉硬扯	Drag hard	3.0625	0.908734	6.14583	1.20265	4.58333	1.77252	7.125	1.23124	3.08	0.996661	6.04	1.2741	5.04348	1.7183	7.04348	0.877924	3.04348	0.824525	6.26087	1.13688	4.16	1.74833	7.2	1.5	生拉硬扯	48	25	23	48	23	25	生拉硬扯	48	32	生	4823.71	5	拉	699.256	8	硬	112.985	12	扯	18.8929	7
1354	声名狼藉	Disreputable	2.14634	1.0621	6.63415	1.19909	3.74468	1.63479	7.21277	1.38212	2.04545	1.0901	6.59091	1.14056	4.11538	1.70474	6.80769	1.49718	2.26316	1.04574	6.68421	1.29326	3.28571	1.45406	7.71429	1.0556	声名狼藉	41	22	19	47	26	21	声名狼藉	464	40	声	768.616	7	名	1361.14	6	狼	27.4724	10	藉	3.24022	17
1357	绳捆索绑	Truss up	3.21429	1.25	5.84694	1.49375	3.73469	2.10926	6.44898	2.06217	2.92308	1.41204	5.92308	1.69524	4.16667	2.25864	6.20833	2.02117	3.54348	0.964283	5.76087	1.26014	3.32	1.90875	6.68	2.11581	绳捆索绑	49	26	23	49	24	25	绳捆索绑	21	40	绳	30.499	11	捆	9.70228	10	索	179.603	10	绑	15.0096	9
1358	尸骨未寒	The body is not cold	2.69231	1.19121	6.51923	1.46135	3.55102	1.65908	6.59184	2.17867	2.82353	1.2916	6.27451	1.5758	3.83333	1.76109	6.08333	2.16527	2.56604	1.08325	6.75472	1.31421	3.28	1.54164	7.08	2.11975	尸骨未寒	104	51	53	49	24	25	尸骨未寒	86	29	尸	15.6935	3	骨	162.914	9	未	595.662	5	寒	91.5453	12
1359	失之毫厘	The slightest loss	3.84158	1.24686	5.78218	1.06399	4.96	1.6655	6.94	1.28428	4.5102	0.938138	5.32653	0.625425	5.28	1.4	6.48	1.35769	3.21154	1.17718	6.21154	1.21003	4.64	1.86815	7.4	1.04083	失之毫厘	101	49	52	50	25	25	失之毫厘	51	27	失	590.556	5	之	2500.29	2	毫	194.653	11	厘	44.5975	9
1360	失足青年	A lost youth	3.57447	1.2979	5.6383	1.43596	4.87755	1.57629	7.16327	1.40456	3.52174	1.27456	5.56522	1.23679	4.54167	1.38247	6.79167	1.64129	3.625	1.34528	5.70833	1.62799	5.2	1.70783	7.52	1.04563	失足青年	47	23	24	49	24	25	失足青年	92	26	失	590.556	5	足	543.77	7	青	908.566	8	年	5151.12	6
1366	十室九空	Nine houses out of ten are deserted	3.66667	1.24342	5.4375	1.74924	4.48936	1.57249	6.25532	1.6742	3.76	0.969536	5.56	1.00333	4.54545	1.405	6.22727	1.15189	3.56522	1.5023	5.30435	2.32447	4.44	1.73397	6.28	2.05183	十室九空	48	25	23	47	22	25	十室九空	67	21	十	1226.38	2	室	317.443	9	九	331.713	2	空	758.875	8
1378	始乱终弃	First he abused her and in the end he gave her up; forsake after having dallied with	3.03774	1.42712	6.27358	1.29859	4.93617	1.92697	6.29787	2.27381	3.61111	1.50993	5.94444	1.23497	5.16667	1.73623	5.58333	2.28257	2.44231	1.05558	6.61538	1.28573	4.69565	2.11992	7.04348	2.05555	始乱终弃	106	54	52	47	24	23	始乱终弃	74	30	始	662.015	8	乱	203.363	7	终	386.994	8	弃	53.252	7
1381	市井小人	A mean fellow of the marketplace	3.19417	1.12073	5.53398	1.2743	4.65385	1.51961	7.01923	1.44833	3.59184	1.09769	5.02041	1.07024	4.53571	1.31887	6.57143	1.57359	2.83333	1.02331	6	1.27383	4.79167	1.74404	7.54167	1.10253	市井小人	103	49	54	52	28	24	市井小人	38	14	市	2160.53	5	井	80.8748	4	小	2135.97	3	人	10357.8	2
1382	市井之徒	Philistine	3.41748	1.07123	5.61165	1.21456	4.60784	1.4571	6.19608	1.69729	3.68627	1.15741	5.29412	1.23764	4.53846	1.42073	6.11538	1.50537	3.15385	0.915758	5.92308	1.11753	4.68	1.51987	6.28	1.90438	市井之徒	103	51	52	51	26	25	市井之徒	17	21	市	2160.53	5	井	80.8748	4	之	2500.29	2	徒	149.117	10
1384	似笑非笑	Like laughter	3.85577	1.18582	5.375	1.27094	5.8	1.5253	7.32	1.09619	4.01961	0.969334	5.37255	0.799019	5.6	1.47196	7	1.1547	3.69811	1.35284	5.37736	1.60799	6	1.58114	7.64	0.95219	似笑非笑	104	51	53	50	25	25	似笑非笑	332	34	似	351.708	6	笑	335.449	10	非	678.212	8	笑	335.449	10
1386	势利小人	Snob villains	2.41667	1.02798	6.125	2.02773	4.13725	1.54945	7.11765	1.1941	2.45833	1.14129	5.33333	2.27781	4.25	1.50616	6.75	1.26564	2.375	0.923721	6.91667	1.38051	4	1.62369	7.56522	0.945135	势利小人	48	24	24	51	28	23	势利小人	67	20	势	267.427	8	利	1925.1	7	小	2135.97	3	人	10357.8	2
1391	视钱如命	Regard money as life	2.74468	1.11254	6.04255	1.75645	5.125	2.0999	7.35417	1.08156	2.73913	1.25109	5.86957	2.00691	5.58333	1.69184	6.95833	1.12208	2.75	0.989071	6.20833	1.50302	4.66667	2.38959	7.75	0.896854	视钱如命	47	23	24	48	24	24	视钱如命	14	32	视	842.207	8	钱	317.142	10	如	1955.83	6	命	1075.17	8
1393	视同儿戏	Trifle with	3.32609	1.07609	5.86957	1.72058	5.61224	1.61782	6.81633	1.53668	3.3913	0.940944	5.52174	1.41001	5.58333	1.31601	6.625	1.27901	3.26087	1.21421	6.21739	1.95301	5.64	1.89033	7	1.75594	视同儿戏	46	23	23	49	24	25	视同儿戏	33	22	视	842.207	8	同	2786.12	6	儿	905.272	2	戏	234.451	6
1394	视同陌路	Take one as a passer-by	3.48148	1.10632	5.53704	1.21844	5.5	1.65677	6.74	1.61384	3.83636	1.10158	5.50909	0.99764	5.48	1.26227	6.16	1.67531	3.11321	0.993447	5.56604	1.42112	5.52	2.0025	7.32	1.34536	视同陌路	108	55	53	50	25	25	视同陌路	20	35	视	842.207	8	同	2786.12	6	陌	13.4637	8	路	1036.73	13
1398	是非颠倒	Confound right and wrong	2.55882	1.01057	6.57843	1.30069	4.45833	2.02073	7.25	1.13924	2.58824	1.06163	6.33333	1.38082	4.91304	2.10871	7.04348	1.10693	2.52941	0.966498	6.82353	1.17823	4.04	1.88149	7.44	1.15758	是非颠倒	102	51	51	48	23	25	是非颠倒	101	43	是	9027.33	9	非	678.212	8	颠	29.0429	16	倒	242.688	10
1410	瘦骨伶仃	Skinny and scrawny	3.20833	1.32019	5.4375	1.30313	4.35417	1.7923	7.10417	1.01561	2.95833	1.30148	5.54167	1.53167	4	1.47442	6.875	0.946963	3.45833	1.31807	5.33333	1.0495	4.70833	2.0319	7.33333	1.0495	瘦骨伶仃	48	24	24	48	24	24	瘦骨伶仃	70	34	瘦	29.3253	14	骨	162.914	9	伶	3.21436	7	仃	0.828766	4
1416	鼠窃狗偷	Filch like rats and snatch like dogs	2.65957	1.29004	6.40426	1.46939	4.36735	1.6033	5.73469	1.71726	2.13043	0.814881	6.43478	1.61881	4.25	1.56733	6.04167	1.12208	3.16667	1.46456	6.375	1.34528	4.48	1.66132	5.44	2.12289	鼠窃狗偷	47	23	24	49	24	25	鼠窃狗偷	21	41	鼠	18.3703	13	窃	18.5731	9	狗	47.5663	8	偷	71.1255	11
1417	束手束脚	Be bound hands and feet	3.39583	0.961815	5.29167	1.54312	4.08889	1.85647	7.17778	1.05073	3.25	0.989071	5.25	1.2938	4.69565	1.71715	6.86957	1.01374	3.54167	0.931533	5.33333	1.78561	3.45455	1.81861	7.5	1.01183	束手束脚	48	24	24	45	23	22	束手束脚	57	29	束	199.093	7	手	1414.05	4	束	199.093	7	脚	176.832	11
1421	数九寒冬	The coldest days of the year	3.97872	1.43693	5.42553	1.15617	3.46	1.76369	7.36	1.53543	4	1.38444	5.2	1.25831	3.36	2.05913	7.72	1.02144	3.95455	1.52682	5.68182	0.994574	3.56	1.44568	7	1.87083	数九寒冬	47	25	22	50	25	25	数九寒冬	42	32	数	1155.01	13	九	331.713	2	寒	91.5453	12	冬	103.113	5
1422	耍小聪明	Only know how to play tricks on small things	3.42056	1.12466	5.76636	0.976898	5.60784	1.69798	7.45098	0.923336	3.4	1.09882	5.69091	0.940306	5.14286	1.81994	7.32143	1.0203	3.44231	1.1617	5.84615	1.0172	6.17391	1.37021	7.6087	0.782718	耍小聪明	107	55	52	51	28	23	耍小聪明	72	35	耍	18.9684	9	小	2135.97	3	聪	24.8745	15	明	1782.89	8
1423	耍嘴皮子	Show off one's eloquence	2.95455	1.11969	5.77273	1.44453	5.88	1.70999	7.36	1.15635	3.04762	0.973457	5.38095	1.39557	6.03846	1.56156	7.03846	1.18257	2.86957	1.25424	6.13043	1.42396	5.70833	1.87615	7.70833	1.0417	耍嘴皮子	44	21	23	50	26	24	耍嘴皮子	75	33	耍	18.9684	9	嘴	97.4276	16	皮	267.306	5	子	3348.01	3
1424	摔摔打打	Beat	3.65957	1.33964	5.82979	1.2738	5.54167	1.55684	6.9375	1.21	3.73913	1.60163	6	1.16775	5.88	1.39403	6.84	1.21381	3.58333	1.05981	5.66667	1.37261	5.17391	1.6693	7.04348	1.22394	摔摔打打	47	23	24	48	25	23	摔摔打打	20	38	摔	18.8207	14	摔	18.8207	14	打	847.707	5	打	847.707	5
1429	水性杨花	Skittish woman	2.74	1.48111	6.22	1.45108	5.39583	1.60769	6.97917	1.43645	2.97368	1.64092	5.90789	1.48034	5.45833	1.58743	6.41667	1.66594	2.5	1.26329	6.54054	1.35676	5.33333	1.6594	7.54167	0.883627	水性杨花	150	76	74	48	24	24	水性杨花	103	26	水	1535.76	4	性	1799.09	8	杨	12.2124	7	花	625.91	7
1431	说变就变	Change overnight	3.49515	1.28241	6.09709	1.08929	4.63265	2.15729	7.02041	1.37674	3.84314	1.34718	5.86275	0.938501	5.04	1.83666	6.8	1.22474	3.15385	1.12694	6.32692	1.18357	4.20833	2.41335	7.25	1.51083	说变就变	103	51	52	49	25	24	说变就变	103	37	说	2761.37	9	变	1060.95	8	就	2333.69	12	变	1060.95	8
1432	说东道西	Make all kinds of remarks	3.25	0.962904	5.82692	1.17781	4.86792	1.69884	7.03774	1.19232	3.54717	0.910749	5.56604	1.06535	4.67857	1.70084	7	1.1547	2.94118	0.925457	6.09804	1.23701	5.08	1.70587	7.08	1.25565	说东道西	104	53	51	53	28	25	说东道西	62	32	说	2761.37	9	东	1271.91	5	道	2174.2	12	西	1589.34	6
1433	说风凉话	Say cool words	2.90476	1.00502	6.07619	1.40531	5.6875	1.83531	7.1875	1.04487	3.07692	1.00676	5.84615	1.39164	5.66667	1.711	6.95833	1.0417	2.73585	0.983536	6.30189	1.39484	5.70833	1.98865	7.41667	1.01795	说风凉话	105	52	53	48	24	24	说风凉话	96	31	说	2761.37	9	风	877.382	4	凉	60.0223	10	话	1185.64	8
1437	斯文扫地	A scholar's misbehaviour	3.54717	1.20422	5.67925	1.13429	4.92	1.58874	6.26	1.81614	3.71698	1.16648	5.4717	1.21851	5.36	1.60416	6.36	1.60416	3.37736	1.22829	5.88679	1.01262	4.48	1.47535	6.16	2.0347	斯文扫地	106	53	53	50	25	25	斯文扫地	70	28	斯	334.333	12	文	2397.82	4	扫	78.0231	6	地	4442.5	6
1438	撕破脸皮	Tear up your face	2.61702	1.15256	6.53191	1.70487	5.1875	1.96411	7.375	1.06441	2.69565	1.22232	6.08696	2.06514	5.73913	1.60163	7.13043	1.05763	2.54167	1.10253	6.95833	1.16018	4.68	2.15484	7.6	1.04083	撕破脸皮	47	23	24	48	23	25	撕破脸皮	40	41	撕	14.9375	15	破	408.047	10	脸	196.834	11	皮	267.306	5
1439	死不改悔	Refuse to repent	2.21154	0.962128	6.96154	1.14843	4.28571	1.75594	7.08163	1.13352	1.92157	0.890913	7.09804	1.17055	4.41667	1.79169	6.75	1.03209	2.49057	0.953186	6.83019	1.12208	4.16	1.74833	7.4	1.1547	死不改悔	104	51	53	49	24	25	死不改悔	67	27	死	481.523	6	不	9822.27	4	改	1047.42	7	悔	38.8493	10
1440	死不悔改	Do not repent; never repent; unrepentant	2.35644	1.05436	6.71287	1.36628	4.72917	1.84206	6.97917	1.0617	2.07843	0.890913	6.96078	1.37056	4.70833	1.98865	6.70833	1.19707	2.64	1.13856	6.46	1.32803	4.75	1.72576	7.25	0.84699	死不悔改	101	51	50	48	24	24	死不悔改	44	27	死	481.523	6	不	9822.27	4	悔	38.8493	10	改	1047.42	7
1443	死皮赖脸	Be lost to all sense of shame	2.48571	1.0011	6.39048	1.22078	4.48936	1.80425	7.19149	1.11586	2.47059	1.00703	6.07843	1.11073	4.625	1.68916	6.75	1.03209	2.5	1.00471	6.68519	1.25629	4.34783	1.94489	7.65217	1.0273	死皮赖脸	105	51	54	47	24	23	死皮赖脸	66	35	死	481.523	6	皮	267.306	5	赖	70.9684	13	脸	196.834	11
1444	死乞白赖	Pester	2.73333	1.09545	6.06667	1.40454	5.20408	1.88171	7.30612	1.08405	2.82609	1.11405	5.78261	1.73091	5.75	1.56733	7.125	0.850192	2.63636	1.09307	6.36364	0.902138	4.68	2.03552	7.48	1.26227	死乞白赖	45	23	22	49	24	25	死乞白赖	85	27	死	481.523	6	乞	6.74444	3	白	720.164	5	赖	70.9684	13
1445	死无对证	There was no testimony of witness after the conspirator passed away	3.04808	1.17729	6.22115	1.24602	3.22449	1.61071	7.02041	1.4929	3.13208	1.17731	6.01887	1.40727	3.41667	1.5299	6.75	1.15156	2.96078	1.18255	6.43137	1.02479	3.04	1.69509	7.28	1.74452	死无对证	104	53	51	49	24	25	死无对证	102	22	死	481.523	6	无	1828.92	4	对	2881.21	5	证	756.153	7
1447	死要面子	Try to preserve one's fall at all costs	3.35922	1.00834	5.74757	1.12649	5.14286	1.95789	7.2449	1.18199	3.32075	1.01477	5.62264	1.00434	5.625	1.58286	6.95833	1.08264	3.4	1.01015	5.88	1.23949	4.68	2.19317	7.52	1.22882	死要面子	103	53	50	49	24	25	死要面子	97	27	死	481.523	6	要	3871.32	9	面	2739.19	9	子	3348.01	3
1449	四面透风	Aux quatre vents	3.80851	1.31278	5.57447	1.45579	4	1.71563	6.87037	1.55462	3.56522	1.27301	5.65217	1.30065	4.27586	1.84964	7.10345	1.11307	4.04167	1.33447	5.5	1.61515	3.68	1.51987	6.6	1.93649	四面透风	47	23	24	54	29	25	四面透风	75	28	四	747.386	5	面	2739.19	9	透	146.281	10	风	877.382	4
1456	肆意妄为	Do what one wishes without restraint	2.64486	1.06623	6.36449	1.55037	5.10204	2.05391	6.89796	1.59746	2.77358	1.17082	5.98113	1.78121	4.56	1.91659	6.4	1.75594	2.51852	0.946508	6.74074	1.18457	5.66667	2.07818	7.41667	1.24819	肆意妄为	107	53	54	49	25	24	肆意妄为	58	36	肆	22.6706	13	意	1962.75	13	妄	11.5973	6	为	5620.72	4
1457	松松垮垮	Loose	3.35417	1.02084	5.39583	1.5944	5.40426	1.49869	7.08511	1.11958	3.45833	1.06237	5.54167	1.38247	5.6087	1.588	6.78261	1.0853	3.25	0.989071	5.25	1.79976	5.20833	1.41357	7.375	1.09594	松松垮垮	48	24	24	47	23	24	松松垮垮	153	34	松	189.836	8	松	189.836	8	垮	11.3333	9	垮	11.3333	9
1458	松松散散	Loosely scattered scattered	3.64583	1.0617	4.97917	1.29631	5.32653	1.37519	7	1.09924	3.32	1.249	5.2	1.1547	5.33333	1.27404	6.79167	0.883627	4	0.6742	4.73913	1.42118	5.32	1.4922	7.2	1.25831	松松散散	48	25	23	49	24	25	松松散散	24	40	松	189.836	8	松	189.836	8	散	236.394	12	散	236.394	12
1463	随波逐流	Go with the flow	3.6087	1.18281	5.45652	1.69583	3.88	1.79159	7	1.45686	3.63636	1.17698	5.27273	1.63829	4.96	1.74356	6.6	1.5	3.58333	1.21285	5.625	1.76469	2.8	1.04083	7.4	1.32288	随波逐流	46	22	24	50	25	25	随波逐流	694	39	随	474.528	11	波	347.556	8	逐	115.973	10	流	948.45	10
1466	缩头缩脑	Recoil in fear; be timid	3.04082	1.17188	5.28571	1.5	5.06383	1.71191	6.97872	1.09325	3.04	1.05987	5.6	1.58114	5.3913	1.588	6.69565	1.06322	3.04167	1.30148	4.95833	1.36666	4.75	1.79976	7.25	1.07339	缩头缩脑	49	25	24	47	23	24	缩头缩脑	63	43	缩	122.323	14	头	1198.71	5	缩	122.323	14	脑	314.9	10
1467	琐琐碎碎	Fragmentary	3.45833	1.12908	5.10417	1.38748	4.93878	1.40547	7.12245	0.9494	3.24	1.23423	4.96	1.54056	4.88	1.45258	6.88	0.881287	3.69565	0.97397	5.26087	1.21421	5	1.38313	7.375	0.969648	琐琐碎碎	48	25	23	49	25	24	琐琐碎碎	77	48	琐	5.97895	11	琐	5.97895	11	碎	66.4394	13	碎	66.4394	13
1470	贪心不足	Greedy and dissatisfied	2.93333	1.08545	6	1.27852	4.95833	1.80965	6.77083	1.35646	2.7963	1.18767	6.01852	1.44706	5.33333	1.8098	6.75	0.84699	3.07843	0.95589	5.98039	1.0861	4.58333	1.76725	6.79167	1.74404	贪心不足	105	54	51	48	24	24	贪心不足	90	23	贪	46.6994	8	心	2318.57	4	不	9822.27	4	足	543.77	7
1475	袒胸露背	Expose one‘s back and chest	3.1875	1.3785	5.97917	1.46577	5.82979	1.56482	6.91489	1.52984	2.875	1.1156	5.75	1.59483	6.21739	1.44463	6.91304	1.20276	3.5	1.56038	6.20833	1.31807	5.45833	1.61458	6.91667	1.81579	袒胸露背	48	24	24	47	23	24	袒胸露背	42	50	袒	1.96373	10	胸	74.0283	10	露	213.384	21	背	202.778	9
1476	袒胸露臂	Bare chest and arm	3.64583	1.19377	5.54167	1.59732	5.84	1.74215	6.9	1.47427	3.32	1.249	5.6	1.55456	5.84615	1.78196	6.88462	1.14287	4	1.04447	5.47826	1.67521	5.83333	1.73623	6.91667	1.79169	袒胸露臂	48	25	23	50	26	24	袒胸露臂	60	58	袒	1.96373	10	胸	74.0283	10	露	213.384	21	臂	39.4895	17
1481	桃色事件	Love affairs	3.42553	1.42561	5.85106	1.3348	4.40426	1.74031	6.59574	1.6896	3.125	1.22696	5.45833	1.25036	4.36364	1.96506	6.77273	1.10978	3.73913	1.57299	6.26087	1.32175	4.44	1.55671	6.44	2.08327	桃色事件	47	24	23	47	22	25	桃色事件	47	30	桃	48.8496	10	色	949.075	6	事	2624.46	8	件	1005.78	6
1484	题海战术	A mountain of homework	3.69811	1.31054	5.70755	1.40724	3.96	2.17556	7.24	1.43655	4.13208	1.33067	5.62264	1.11332	3.69231	1.61912	6.65385	1.59856	3.26415	1.14608	5.79245	1.65667	4.25	2.65805	7.875	0.899879	题海战术	106	53	53	50	26	24	题海战术	73	39	题	1252.36	15	海	1315.95	10	战	1502.44	9	术	744.621	5
1487	天不作美	The weather is not too good	3.40426	1.01424	5.31915	1.21774	2.97917	1.61758	7.27083	1.23322	3.24	1.16476	5.16	1.10604	3.25	1.79976	7.08333	1.05981	3.59091	0.796366	5.5	1.33631	2.70833	1.39811	7.45833	1.38247	天不作美	47	25	22	48	24	24	天不作美	60	24	天	2247.5	4	不	9822.27	4	作	4031.82	7	美	1436.88	9
1492	天塌地陷	Earth crumbles	2.38235	1.19441	7.08824	1.4631	2.16667	1.54828	7.4375	1.02949	1.83673	0.897843	7.14286	1.60728	2.16667	1.52277	7.375	1.09594	2.88679	1.2194	7.03774	1.32958	2.16667	1.60615	7.5	0.978019	天塌地陷	102	49	53	48	24	24	天塌地陷	48	33	天	2247.5	4	塌	15.5833	13	地	4442.5	6	陷	95.8919	10
1496	天摇地动	Perfect storm	3.48936	1.92096	6.55319	1.82743	2.81633	1.97562	6.73469	1.90149	2.88	1.9218	6.6	2.06155	2.68	2.19317	6.84	1.97231	4.18182	1.70814	6.5	1.56601	2.95833	1.75646	6.625	1.86063	天摇地动	47	25	22	49	25	24	天摇地动	45	29	天	2247.5	4	摇	104.098	13	地	4442.5	6	动	3207.89	6
1501	挑肥拣瘦	Picky	3.10417	1.24182	5.5	1.36833	5.46939	1.94831	7.38776	1.09576	2.96	1.05987	5.28	1.30767	5.54167	1.7932	7.04167	0.954585	3.26087	1.42118	5.73913	1.42118	5.4	2.12132	7.72	1.13725	挑肥拣瘦	48	25	23	49	24	25	挑肥拣瘦	105	39	挑	106.792	9	肥	99.8922	8	拣	6.48588	8	瘦	29.3253	14
1502	挑三拣四	To pick and choose	3.18367	1.11193	5.5102	1.68477	5.9	1.63195	7.44	0.993037	3.28	1.2083	5.36	1.60416	5.64	1.41067	7.04	0.978093	3.08333	1.01795	5.66667	1.78561	6.16	1.81842	7.84	0.85049	挑三拣四	49	25	24	50	25	25	挑三拣四	81	25	挑	106.792	9	三	1255.48	3	拣	6.48588	8	四	747.386	5
1503	挑挑拣拣	Pick	3.32653	1.16168	5.44898	1.52836	6.16327	1.79521	7.53061	0.937684	3.16	1.02794	5.56	1.58325	6.04167	1.70623	7.125	0.850192	3.5	1.28537	5.33333	1.49395	6.28	1.90438	7.92	0.862168	挑挑拣拣	49	25	24	49	24	25	挑挑拣拣	108	34	挑	106.792	9	挑	106.792	9	拣	6.48588	8	拣	6.48588	8
1508	停工停产	Stop work and stop production	3.13043	1.27556	5.91304	1.33043	3.93878	1.93011	6.73469	1.31934	3.04167	1.33447	5.75	1.59483	4.2	2.12132	6.72	1.13725	3.22727	1.23179	6.09091	0.971454	3.66667	1.711	6.75	1.51083	停工停产	46	24	22	49	25	24	停工停产	72	31	停	244.508	11	工	3526.41	3	停	244.508	11	产	3213.45	6
1517	捅马蜂窝	Stir up a hornets' nest	3.19048	1.2717	6.77143	1.18693	5.31915	2.35082	7.08511	1.15777	2.96226	1.0735	6.4717	1.15365	5.56522	2.33211	6.78261	1.16605	3.42308	1.419	7.07692	1.15209	5.08333	2.39414	7.375	1.09594	捅马蜂窝	105	53	52	47	23	24	捅马蜂窝	24	38	捅	2.587	10	马	1026.99	3	蜂	29.4811	13	窝	35.2287	12
1519	偷梁换柱	Steal the beams and pillars and replace them with rotten timbers	2.92381	1.10676	6.15238	1.29927	5	2.06155	7.20408	1.35369	2.67925	1.17299	6.4717	1.11982	4.76	2.02649	6.88	1.42361	3.17308	0.98461	5.82692	1.39637	5.25	2.11105	7.54167	1.21509	偷梁换柱	105	53	52	49	25	24	偷梁换柱	284	41	偷	71.1255	11	梁	89.1951	11	换	269.673	10	柱	23.4919	9
1520	偷天换日	Cheat by using a substitute	3.10476	1.35819	6.08571	1.39446	4.04082	2.12092	6.59184	1.52641	2.50943	1.03073	6.0566	1.52435	3.625	2.16318	6.33333	1.60615	3.71154	1.39096	6.11538	1.26264	4.44	2.04287	6.84	1.43411	偷天换日	105	53	52	49	24	25	偷天换日	61	29	偷	71.1255	11	天	2247.5	4	换	269.673	10	日	3252.04	4
1521	偷偷摸摸	In a sneaky way	2.53333	1.01354	6.31111	1.45886	5.32653	1.71255	7.04082	1.24095	2.40909	1.05375	6.04545	1.73143	5.33333	1.6854	6.91667	1.01795	2.65217	0.982052	6.56522	1.12112	5.32	1.77294	7.16	1.43411	偷偷摸摸	45	22	23	49	24	25	偷偷摸摸	635	48	偷	71.1255	11	偷	71.1255	11	摸	54.3121	13	摸	54.3121	13
1523	头昏脑胀	Feel dizzy	3.10072	0.987567	5.71223	1.18716	4.24444	1.87272	7.48889	1.12052	3.33333	0.992933	5.52778	1.11295	4.69565	1.71715	7.08696	1.12464	2.85075	0.925297	5.91045	1.23988	3.77273	1.95014	7.90909	0.971454	头昏脑胀	139	72	67	45	23	22	头昏脑胀	302	31	头	1198.71	5	昏	53.3105	8	脑	314.9	10	胀	50.9392	8
1524	头疼脑热	Headache and slight fever	3.79808	0.969234	5.45192	0.984144	3.44898	1.59506	7.22449	0.963183	4.28846	0.824539	5.28846	0.847986	4.04	1.48549	7	0.957427	3.30769	0.852642	5.61538	1.08743	2.83333	1.49395	7.45833	0.931533	头疼脑热	104	52	52	49	25	24	头疼脑热	99	35	头	1198.71	5	疼	33.2697	10	脑	314.9	10	热	606.285	10
1525	头痛脑热	Headache and slight fever	3.77083	1.07663	5.20833	1.77402	4.10204	1.75885	7.34694	1.25085	4.20833	0.779028	5.20833	1.47381	4.48	1.55778	7.28	1.1	3.33333	1.16718	5.20833	2.06375	3.70833	1.89918	7.41667	1.41165	头痛脑热	48	24	24	49	25	24	头痛脑热	36	37	头	1198.71	5	痛	230.662	12	脑	314.9	10	热	606.285	10
1526	投井下石	To hit sb. when he's down	2.7234	1.28032	6.2766	1.86153	4.80851	2.18332	7.06383	1.09155	2.69565	1.36298	5.91304	2.15139	5.125	1.91816	6.83333	1.0495	2.75	1.22474	6.625	1.49819	4.47826	2.42842	7.30435	1.10514	投井下石	47	23	24	47	24	23	投井下石	15	19	投	677.976	7	井	80.8748	4	下	2891.04	3	石	524.158	5
1528	图财害命	Murder for money	1.86735	0.869148	7.38776	1.34419	4.26531	2.12892	6.93878	1.19736	1.45098	0.701818	7.56863	1.64018	4.875	2.5076	6.91667	1.05981	2.31915	0.810432	7.19149	0.9002	3.68	1.51987	6.96	1.33791	图财害命	98	51	47	49	24	25	图财害命	106	33	图	592.919	8	财	387.507	7	害	379.521	10	命	1075.17	8
1529	徒劳往返	In vain	3.31915	1.1441	5.82979	1.22153	4.10417	1.51923	6.79167	1.38316	3.33333	1.0495	5.75	1.18872	4.54167	1.74404	6.70833	0.80645	3.30435	1.25896	5.91304	1.27611	3.66667	1.12932	6.875	1.80127	徒劳往返	47	24	23	48	24	24	徒劳往返	42	32	徒	149.117	10	劳	310.929	7	往	546.028	8	返	97.7849	7
1530	徒有其表	Specious	3.3125	1.24039	5.64583	1.26305	4.57143	1.29099	6.69388	1.46065	3.20833	1.21509	5.66667	1.00722	4.66667	1.43456	6.16667	1.46456	3.41667	1.28255	5.625	1.49819	4.48	1.15902	7.2	1.29099	徒有其表	48	24	24	49	24	25	徒有其表	83	32	徒	149.117	10	有	8648.03	6	其	1873.8	8	表	1854.42	8
1532	涂脂抹粉	Prettify	3.6383	1.43596	5.3617	1.43596	6.28	1.48516	7.24	1.13497	3.79167	1.47381	5.25	1.22474	6.36	1.25433	7.2	0.912871	3.47826	1.41001	5.47826	1.64785	6.2	1.70783	7.28	1.33915	涂脂抹粉	47	24	23	50	25	25	涂脂抹粉	304	38	涂	59.0023	10	脂	26.7396	10	抹	22.4665	8	粉	111.631	10
1533	土得掉渣	Unrefined	3.45833	1.33621	5.5	1.47316	5.12766	1.58275	6.93617	1.3089	3.66667	1.30773	5.375	1.31256	4.56522	0.992063	6.69565	1.18455	3.25	1.35935	5.625	1.63687	5.66667	1.85722	7.16667	1.40393	土得掉渣	48	24	24	47	23	24	土得掉渣	81	37	土	568.512	3	得	2822.14	11	掉	135.805	11	渣	11.9171	12
1535	土头土脑	Behavior, manners, dress, etc are not fashionable.	3.89583	1.25883	4.875	1.57946	4.9	1.40335	6.6	1.72615	3.66667	1.0495	4.95833	1.39811	4.56	1.19304	6.64	0.994987	4.125	1.42379	4.79167	1.76879	5.24	1.53514	6.56	2.2561	土头土脑	48	24	24	50	25	25	土头土脑	63	21	土	568.512	3	头	1198.71	5	土	568.512	3	脑	314.9	10
1540	吞吞吐吐	Mutter and mumble	3.3617	0.895048	4.93617	1.49498	5.57143	1.60728	7.02041	0.901152	3.16667	1.0495	5.08333	1.44212	5.45833	1.47381	6.83333	0.963087	3.56522	0.662371	4.78261	1.56544	5.68	1.74929	7.2	0.816497	吞吞吐吐	47	24	23	49	24	25	吞吞吐吐	989	26	吞	39.3194	7	吞	39.3194	7	吐	49.3844	6	吐	49.3844	6
1544	拖来拖去	Towed and dragged	3.32653	0.89879	5.63265	1.55046	5.10204	1.90662	7.22449	0.963183	3.32	0.802081	5.72	1.30767	5.20833	1.74404	7	0.932505	3.33333	1.00722	5.54167	1.7932	5	2.08167	7.44	0.960902	拖来拖去	49	25	24	49	24	25	拖来拖去	48	28	拖	56.8433	8	来	4682.8	7	拖	56.8433	8	去	1621.28	5
1548	唾沫星子	Spit	3	1.12815	5.77778	1.18492	5.38776	2.02912	7.30612	1.1031	3.125	1.191	5.5	1.17954	5	1.7693	6.95833	1.12208	2.85714	1.06234	6.09524	1.13599	5.76	2.22261	7.64	0.994987	唾沫星子	45	24	21	49	24	25	唾沫星子	100	31	唾	3.47769	11	沫	25.4053	8	星	711.731	9	子	3348.01	3
1549	歪瓜裂枣	Sb. with an ugly face	3.58	1.05582	5.56	1.00825	4.8125	1.60659	6.91667	1.26883	3.94118	1.06605	5.41176	0.82889	4.16667	1.43456	6.625	1.13492	3.20408	0.912405	5.71429	1.1547	5.45833	1.53167	7.20833	1.35066	歪瓜裂枣	100	51	49	48	24	24	歪瓜裂枣	21	34	歪	23.2034	9	瓜	58.743	5	裂	105.885	12	枣	14.1577	8
1550	歪七扭八	Crooked	3.12766	1.13477	5.40426	1.31314	4.83333	1.22619	6.75	1.4366	2.8	1.25831	5.44	1.52971	4.95652	1.29609	6.73913	1.05388	3.5	0.859125	5.36364	1.0486	4.72	1.17331	6.76	1.73877	歪七扭八	47	25	22	48	23	25	歪七扭八	32	20	歪	23.2034	9	七	238.784	2	扭	40.2367	7	八	368.864	2
1551	歪歪倒倒	Crooked and unsteady	3.22917	1.22456	5.58333	1.36574	5.02	1.60979	6.66	1.54669	3.08333	1.21285	5.95833	0.954585	5.28	1.67133	6.6	1.29099	3.375	1.24455	5.20833	1.61458	4.76	1.53514	6.72	1.79165	歪歪倒倒	48	24	24	50	25	25	歪歪倒倒	62	38	歪	23.2034	9	歪	23.2034	9	倒	242.688	10	倒	242.688	10
1552	歪歪扭扭	Twisting	3.57778	1.09729	5.48889	1.01404	5	1.5253	7.24	1.22157	3.54545	1.1434	5.36364	0.953463	5.12	1.66633	7.04	1.17189	3.6087	1.07615	5.6087	1.07615	4.88	1.39403	7.44	1.26095	歪歪扭扭	45	22	23	50	25	25	歪歪扭扭	253	32	歪	23.2034	9	歪	23.2034	9	扭	40.2367	7	扭	40.2367	7
1553	歪歪斜斜	Crooked	3.59184	1.27342	5.44898	1.59506	5.2	1.67819	6.82	1.59962	3.56	1.35647	5.72	1.33915	5.08	1.80093	6.72	1.67133	3.625	1.20911	5.16667	1.8098	5.32	1.57374	6.92	1.55242	歪歪斜斜	49	25	24	50	25	25	歪歪斜斜	377	40	歪	23.2034	9	歪	23.2034	9	斜	41.9602	11	斜	41.9602	11
1556	弯腰曲背	Bend the back of the curved back	3.93878	1.31352	4.97959	1.37674	5.23529	2.2234	7.13725	1.14925	4.08	1.07703	4.88	1.1299	4.66667	2.11224	7.14815	1.02671	3.79167	1.53167	5.08333	1.6129	5.875	2.21286	7.125	1.2959	弯腰曲背	49	25	24	51	27	24	弯腰曲背	78	37	弯	41.9561	9	腰	57.7591	13	曲	282.409	6	背	202.778	9
1559	玩忽职守	Neglect of duty	2.69565	1.11295	6.3913	1.23789	4.66667	2.04558	7.0625	1.34332	2.54167	1.21509	6.625	1.46888	4.75	2.09035	6.95833	1.19707	2.86364	0.990212	6.13636	0.888844	4.58333	2.04124	7.16667	1.49395	玩忽职守	46	24	22	48	24	24	玩忽职守	1772	33	玩	120.326	8	忽	135.535	8	职	280.294	11	守	239.788	6
1563	万箭穿心	In extreme grief	2.375	1.2484	7.3125	1.29082	3.34	1.80261	7.22	1.4886	2.20833	1.50302	7.70833	1.0417	3.92308	1.91673	7.19231	1.23351	2.54167	0.931533	6.91667	1.41165	2.70833	1.45898	7.25	1.75078	万箭穿心	48	24	24	50	26	24	万箭穿心	32	31	万	781.635	3	箭	49.6416	15	穿	174.362	9	心	2318.57	4
1566	亡国之音	Voice of perishing country	2.17391	1.06049	7.08696	1.51769	3.65957	1.82109	6.44681	1.93153	1.81818	1.09702	7.95455	1.0455	4.16667	2.099	5.95833	2.11576	2.5	0.932505	6.29167	1.45898	3.13043	1.32474	6.95652	1.60902	亡国之音	46	22	24	47	24	23	亡国之音	54	22	亡	89.0366	3	国	9484.82	8	之	2500.29	2	音	533.815	9
1571	威迫利诱	Coercion and lure	2.69565	1.02999	6.3913	1.55604	4.10417	2.33602	6.72917	1.48381	2.63636	1.00216	6.27273	1.35161	4.56	2.48462	6.24	1.78606	2.75	1.07339	6.5	1.74456	3.6087	2.10495	7.26087	0.810016	威迫利诱	46	22	24	48	25	23	威迫利诱	34	33	威	108.709	9	迫	89.2972	8	利	1925.1	7	诱	54.078	9
1573	为人所害	Be harmful to people	2.46939	1.27642	6.7551	1.94219	3.54902	1.74715	6.90196	1.34544	2.36	1.15036	6.48	2.10396	3.62963	1.66752	6.48148	1.451	2.58333	1.41165	7.04167	1.75646	3.45833	1.86452	7.375	1.05552	为人所害	49	25	24	51	27	24	为人所害	20	24	为	5620.72	4	人	10357.8	2	所	2259.17	8	害	379.521	10
1575	违禁物品	Prohibited items	3.3125	1.27423	5.90625	1.27018	4.5	2.30572	6.94	1.87801	3.32	1.37598	5.68	1.21518	4.64	2.25241	6.64	1.89033	3.30435	1.18455	6.15217	1.30936	4.36	2.39583	7.24	1.85472	违禁物品	48	25	23	50	25	25	违禁物品	74	37	违	75.6593	7	禁	260.664	13	物	1894.3	8	品	1689.38	9
1576	违心之论	Disobeyed one’s heart	3.08511	1.17639	5.55319	1.61257	5.04167	1.96738	7.04167	1.32019	3.125	1.03472	5.375	1.63687	5.13043	2.02943	6.82609	0.984063	3.04348	1.3307	5.73913	1.60163	4.96	1.94679	7.24	1.56205	违心之论	47	24	23	48	23	25	违心之论	55	19	违	75.6593	7	心	2318.57	4	之	2500.29	2	论	1173.48	6
1578	唯唯诺诺	Be a yes-man	3.27737	1.08959	5.27737	1.3759	4.90141	1.75788	7.12676	1.0272	3.38028	1.18763	5.39437	1.10167	5.02083	1.46577	6.95833	0.966642	3.16667	0.970065	5.15152	1.61952	4.65217	2.26853	7.47826	1.08165	唯唯诺诺	137	71	66	71	48	23	唯唯诺诺	338	42	唯	166.091	11	唯	166.091	11	诺	42.444	10	诺	42.444	10
1581	惟命是从	Always do as one is told	3.76596	1.32226	5.12766	1.76459	3.90196	2.11901	7.03922	1.46916	3.65217	1.0273	5.04348	1.49174	4.80769	1.95998	6.76923	1.45073	3.875	1.56906	5.20833	2.02117	2.96	1.88149	7.32	1.46401	惟命是从	47	23	24	51	26	25	惟命是从	99	32	惟	38.443	11	命	1075.17	8	是	9027.33	9	从	1375.11	4
1592	文字垃圾	Word garbage	3.23404	1.18345	5.46809	1.5583	4.63265	1.59026	6.53061	1.55593	3.13043	1.32474	5.21739	1.73091	4.2	1.60728	6.6	1.41421	3.33333	1.0495	5.70833	1.36666	5.08333	1.47196	6.45833	1.71893	文字垃圾	47	23	24	49	25	24	文字垃圾	15	24	文	2397.82	4	字	580.813	6	垃	18.0532	8	圾	17.9478	6
1599	呜呜咽咽	Whimper	3.44681	1.36427	5.7234	1.48474	5.2	1.67819	7	1.41421	3.30435	1.32921	5.65217	1.72175	5.72	1.54164	6.76	1.33167	3.58333	1.41165	5.79167	1.25036	4.68	1.67631	7.24	1.47986	呜呜咽咽	47	23	24	50	25	25	呜呜咽咽	283	32	呜	12.1212	7	呜	12.1212	7	咽	25.2855	9	咽	25.2855	9
1601	无补于事	Be of no help	3.75238	0.997892	5.4381	1.08241	4.06383	1.64719	6.74468	1.29326	4.13462	0.817189	5.32692	0.833635	4.75	1.25974	6.25	1.25974	3.37736	1.02331	5.54717	1.27951	3.34783	1.72175	7.26087	1.13688	无补于事	105	52	53	47	24	23	无补于事	79	22	无	1828.92	4	补	232.938	7	于	3580.5	3	事	2624.46	8
1604	无力自拔	Incapable of extricate oneself	3.48936	1.15857	5.91489	1.4866	3.4	1.71429	7.14	0.969115	3.30435	1.25896	5.69565	1.7693	4.15385	1.8263	6.80769	0.938903	3.66667	1.0495	6.125	1.15392	2.58333	1.1389	7.5	0.884652	无力自拔	47	23	24	50	26	24	无力自拔	37	20	无	1828.92	4	力	2285.95	2	自	3316.74	6	拔	79.9317	8
1605	无凭无据	Without evidence	3.7234	1.2459	5.51064	1.34927	4.16327	1.37457	6.7551	1.1462	3.6087	1.23359	5.21739	1.04257	3.95833	1.19707	6.41667	1.31601	3.83333	1.27404	5.79167	1.5598	4.36	1.52425	7.08	0.862168	无凭无据	47	23	24	49	24	25	无凭无据	40	27	无	1828.92	4	凭	70.3308	8	无	1828.92	4	据	811.425	11
1606	无亲无故	No relatives	3.67347	1.19701	5.10204	1.78238	3.65957	1.79706	6.97872	1.37508	3.64	1.22066	5.44	1.32539	3.5	1.61515	6.83333	1.09014	3.70833	1.19707	4.75	2.13154	3.82609	1.99208	7.13043	1.63219	无亲无故	49	25	24	47	24	23	无亲无故	101	26	无	1828.92	4	亲	659.671	9	无	1828.92	4	故	384.416	9
1608	无头苍蝇	Aimless flies	3.08511	1.08005	5.40426	1.597	4.86	1.97959	6.82	1.35059	2.76	1.23423	4.96	1.69509	4.64	1.46856	6.56	1.50222	3.45455	0.738549	5.90909	1.34196	5.08	2.39653	7.08	1.15181	无头苍蝇	47	25	22	50	25	25	无头苍蝇	45	30	无	1828.92	4	头	1198.71	5	苍	21.8446	7	蝇	4.23637	14
1610	无妄之灾	An accident	3	1.19782	5.70213	1.4129	3.26531	1.56492	6.04082	1.98913	2.92	1.28841	5.36	1.52425	4.04167	1.62799	5.79167	1.76879	3.09091	1.1088	6.09091	1.1916	2.52	1.08474	6.28	2.18937	无妄之灾	47	25	22	49	24	25	无妄之灾	71	19	无	1828.92	4	妄	11.5973	6	之	2500.29	2	灾	118.901	7
1612	无颜见人	Be ashamed to look people in the face	2.92308	1.03053	6.01923	1.448	4.6875	1.991	7	1.11087	2.76923	1.11347	6.13462	1.4823	5.25	1.70038	6.875	1.22696	3.07692	0.925587	5.90385	1.41781	4.125	2.13282	7.125	0.991814	无颜见人	104	52	52	48	24	24	无颜见人	32	25	无	1828.92	4	颜	34.6163	15	见	1255.38	4	人	10357.8	2
1615	无照行医	Unlicensed practice of medicine	2.59434	1.40596	6.42453	1.38666	4.45098	1.6409	6.33333	1.6207	2.54717	1.44869	6.58491	1.36486	4.69231	1.64364	6.38462	1.32897	2.64151	1.37413	6.26415	1.40262	4.2	1.63299	6.28	1.90438	无照行医	106	53	53	51	26	25	无照行医	32	30	无	1828.92	4	照	494.254	13	行	3839.45	6	医	503.421	7
1619	五谷不分	No distinction between grain	3.41667	1.18202	5.20833	1.90138	4.69388	1.7819	6.83673	1.50481	3.5	1.14208	5.16667	1.99274	4.64	1.91224	6.68	1.46401	3.33333	1.23945	5.25	1.84744	4.75	1.67462	7	1.56038	五谷不分	48	24	24	49	25	24	五谷不分	47	19	五	673.98	4	谷	41.4431	7	不	9822.27	4	分	3077.2	4
1623	五音不全	Pentatonic insufficiency	3.43182	1.30112	5.45455	1.51664	3.7551	1.67743	7.34694	1.07143	3.57143	1.2873	4.90476	1.57812	3.75	1.45213	6.83333	1.00722	3.30435	1.32921	5.95652	1.29609	3.76	1.89912	7.84	0.898146	五音不全	44	21	23	49	24	25	五音不全	59	23	五	673.98	4	音	533.815	9	不	9822.27	4	全	2321.82	6
1630	稀里哗啦	Rustling sound	3.85106	1.17914	5.44681	1.47159	4.90196	1.56531	6.88235	1.38054	3.69565	1.36298	4.95652	1.69164	4.65385	1.57334	6.57692	1.4191	4	0.978019	5.91667	1.05981	5.16	1.54596	7.2	1.29099	稀里哗啦	47	23	24	51	26	25	稀里哗啦	100	39	稀	50.6037	12	里	2015.7	7	哗	12.9507	9	啦	39.8801	11
1645	瞎说八道	Talk nonsense	2.74468	1.05229	6.02128	1.62172	5.3125	1.88111	7.39583	0.939434	2.75	1.11316	5.625	1.88386	5.04348	1.91829	7.04348	0.877924	2.73913	1.00983	6.43478	1.19947	5.56	1.85023	7.72	0.890693	瞎说八道	47	24	23	48	23	25	瞎说八道	35	38	瞎	12.7404	15	说	2761.37	9	八	368.864	2	道	2174.2	12
1648	下不来台	Embarrassing; humiliating	2.97917	1.04147	5.97917	1.2289	4.20408	2.05122	7.10204	1.27875	2.84615	1.1897	6	1.23288	5	1.67332	6.57692	1.30148	3.13636	0.83355	5.95455	1.2527	3.30435	2.09837	7.69565	0.97397	下不来台	48	26	22	49	26	23	下不来台	103	19	下	2891.04	3	不	9822.27	4	来	4682.8	7	台	763.376	5
1649	下逐客令	Off the premises	3.19565	1.14736	5.82609	1.3384	4.60784	2.18246	6.90196	1.30008	3.12	1.30128	5.68	1.51987	4.7037	1.97708	6.81481	1.2721	3.28571	0.956183	6	1.09545	4.5	2.43168	7	1.35133	下逐客令	46	25	21	51	27	24	下逐客令	81	27	下	2891.04	3	逐	115.973	10	客	488.493	9	令	489.012	5
1657	闲言碎语	Idle chat	3.17757	1.01696	5.92523	1.21857	4.38776	1.8576	7.32653	1.1436	3.33333	0.931625	5.74074	1.34845	5.48	1.63605	7.08	1.18743	3.01887	1.08292	6.11321	1.04992	3.25	1.32698	7.58333	1.05981	闲言碎语	107	54	53	49	25	24	闲言碎语	270	36	闲	86.2529	7	言	674.584	7	碎	66.4394	13	语	255.897	9
1664	相形失色	Be tarnished by comparison	3.625	1.23124	5.47917	1.50162	4.34615	1.31186	6.11538	1.85402	3.5	1.14208	5.25	1.59483	4.40741	1.15223	6.11111	1.47631	3.75	1.32698	5.70833	1.39811	4.28	1.48661	6.12	2.22336	相形失色	48	24	24	52	27	25	相形失色	28	27	相	1565.14	9	形	1177.19	7	失	590.556	5	色	949.075	6
1668	硝烟滚滚	Smoke billowing	3.06667	1.13618	6.08889	1.53478	3.22917	1.51923	6.79167	0.988408	3.16667	1.34056	5.66667	1.76109	3.16667	1.6594	6.66667	0.868115	2.95238	0.86465	6.57143	1.07571	3.29167	1.39811	6.91667	1.10007	硝烟滚滚	45	24	21	48	24	24	硝烟滚滚	41	48	硝	17.3782	12	烟	168.283	10	滚	54.9843	13	滚	54.9843	13
1670	小肚鸡肠	Extreme pettiness of character	2.82692	0.99944	5.98077	1.15734	4.97959	1.6893	7.2449	0.924901	2.96226	1.05543	5.83019	1.12208	5.16	1.67531	7	1.08012	2.68627	0.92715	6.13725	1.18355	4.79167	1.71893	7.5	0.65938	小肚鸡肠	104	53	51	49	25	24	小肚鸡肠	47	24	小	2135.97	3	肚	35.7274	7	鸡	85.1377	7	肠	60.4217	7
1673	小里小气	Miserly	3.26531	0.95253	5.44898	1.06186	5.45833	1.51529	7.10417	1.37206	3.4	0.816497	5.32	1.02956	5.58333	1.5299	7.16667	1.16718	3.125	1.07592	5.58333	1.10007	5.33333	1.52277	7.04167	1.57367	小里小气	49	25	24	48	24	24	小里小气	30	17	小	2135.97	3	里	2015.7	7	小	2135.97	3	气	1139.89	4
1675	小人得志	A small man intoxicated by success	2.42157	0.860995	6.4902	1.28776	4.34694	1.53502	6.97959	1.10849	2.50943	0.911943	6.24528	1.32876	4.29167	1.48848	6.54167	1.21509	2.32653	0.800722	6.7551	1.19949	4.4	1.60728	7.4	0.816497	小人得志	102	53	49	49	24	25	小人得志	59	23	小	2135.97	3	人	10357.8	2	得	2822.14	11	志	664.679	7
1683	邪门歪道	Immoral doings	2.65217	1.05867	6.19565	1.46999	4.39623	1.74686	6.83019	1.70673	2.6087	1.2699	5.82609	1.82538	4.64286	1.63785	6.78571	1.28689	2.69565	0.822125	6.56522	0.895752	4.12	1.85562	6.88	2.10792	邪门歪道	46	23	23	53	28	25	邪门歪道	70	30	邪	54.1876	6	门	1206.79	3	歪	23.2034	9	道	2174.2	12
1685	泄露天机	Leakage secret	3.14894	1.26798	6.3617	1.6074	4.3125	1.83531	6.47917	1.7134	3.20833	1.21509	5.83333	1.8098	4.5	1.95604	6.45833	1.25036	3.08696	1.34547	6.91304	1.16436	4.125	1.72734	6.5	2.10589	泄露天机	47	24	23	48	24	24	泄露天机	38	39	泄	35.458	8	露	213.384	21	天	2247.5	4	机	2206.73	6
1689	心黑手辣	Be extremely cruel and merciless	1.76087	0.84813	7.1087	1.50891	3.68627	1.74917	6.88235	1.64496	1.5	0.912871	7.45455	1.56532	3.38462	1.65111	6.65385	1.67194	2	0.722315	6.79167	1.41357	4	1.82574	7.12	1.61555	心黑手辣	46	22	24	51	26	25	心黑手辣	11	34	心	2318.57	4	黑	323.568	12	手	1414.05	4	辣	24.0056	14
1691	心急如火	Be afire with impatience	3.2	1.32459	6.57778	1.54462	4.6875	1.98029	7.33333	0.85883	3.36364	1.52894	6.13636	1.55212	5.20833	2.06375	7.25	0.944089	3.04348	1.10693	7	1.446	4.16667	1.78561	7.41667	0.775532	心急如火	45	22	23	48	24	24	心急如火	77	23	心	2318.57	4	急	256.014	9	如	1955.83	6	火	508.645	4
1692	心焦如焚	Dreadfully anxious	2.85106	1.08305	6.7234	1.71568	3.69388	1.88419	7.18367	1.23615	2.75	1.18872	6.5	1.91107	4.58333	2.01983	6.83333	1.34056	2.95652	0.975997	6.95652	1.49174	2.84	1.28062	7.52	1.04563	心焦如焚	47	24	23	49	24	25	心焦如焚	42	34	心	2318.57	4	焦	97.8413	12	如	1955.83	6	焚	8.26316	12
1693	心口不一	Speak one way and think another	2.75	1	5.97917	1.26305	5.22642	1.73916	7.13208	1.12725	2.5	1.02151	6.25	1.51083	5.21429	1.70744	6.78571	1.22798	3	0.932505	5.70833	0.907896	5.24	1.80924	7.52	0.87178	心口不一	48	24	24	53	28	25	心口不一	32	12	心	2318.57	4	口	1079.29	3	不	9822.27	4	一	12712.2	1
1696	心如刀割	Feel as if a knife were piercing one's heart; hurts a lot	2.80374	1.27708	6.74766	1.37425	3.78723	1.81702	7.19149	0.9002	2.68519	1.35736	6.72222	1.4461	4.34783	1.94489	6.91304	0.900154	2.92453	1.19049	6.77358	1.31034	3.25	1.53934	7.45833	0.832971	心如刀割	107	54	53	47	23	24	心如刀割	143	24	心	2318.57	4	如	1955.83	6	刀	99.3886	2	割	61.4546	12
1697	心如死灰	One's heart is like dead ashes -- utterly dissipated	2.75962	1.15326	6.00962	1.42444	4.06122	1.74891	6.81633	1.21918	2.79245	1.1327	5.88679	1.31061	4.375	1.86063	6.25	1.22474	2.72549	1.18454	6.13725	1.53648	3.76	1.61452	7.36	0.95219	心如死灰	104	53	51	49	24	25	心如死灰	76	22	心	2318.57	4	如	1955.83	6	死	481.523	6	灰	86.6652	6
1704	辛酸苦辣	Mixed with bitterness	3.89362	1.35509	5.6383	1.59381	4.34615	1.84587	7.11538	1.04138	3.73913	1.28691	5.26087	1.60163	4.55556	1.73944	6.96296	1.12597	4.04167	1.42887	6	1.53226	4.12	1.96469	7.28	0.936305	辛酸苦辣	47	23	24	52	27	25	辛酸苦辣	52	43	辛	28.7993	7	酸	135.598	14	苦	332.425	8	辣	24.0056	14
1706	新仇旧恨	New and old hatred	3.05825	1.31227	6.48544	1.41327	4.2	2.03038	6.86	1.55196	3.05882	1.44792	6.5098	1.50163	4.4	2.06155	6.36	1.7767	3.05769	1.17846	6.46154	1.33522	4	2.02073	7.36	1.11355	新仇旧恨	103	51	52	50	25	25	新仇旧恨	31	31	新	2264.38	13	仇	43.8783	4	旧	200.293	5	恨	59.7732	9
1713	形同路人	Form the same way as a stranger	3.32609	1.19358	5.71739	1.45546	4.96	1.80656	6.88	1.33463	3.70833	1.23285	5.20833	1.38247	5.52	1.44684	6.48	1.61038	2.90909	1.01929	6.27273	1.35161	4.4	1.97906	7.28	0.842615	形同路人	46	24	22	50	25	25	形同路人	22	28	形	1177.19	7	同	2786.12	6	路	1036.73	13	人	10357.8	2
1718	兴妖作怪	Encourage monsters to stalk abroad, making trouble, causing disorder	2.66667	1.04447	6.24444	1.81102	3.79592	1.7557	6.04082	2.13072	2.40909	1.09801	5.86364	2.05393	3.79167	1.93321	6.29167	2.0319	2.91304	0.949308	6.6087	1.49967	3.8	1.60728	5.8	2.23607	兴妖作怪	45	22	23	49	24	25	兴妖作怪	61	28	兴	483.166	6	妖	14.4707	7	作	4031.82	7	怪	126.439	8
1719	性命交关	A matter of life and death	3.85417	1.36817	6.89583	1.49096	3.38776	1.7656	6.44898	1.70857	3.79167	1.5598	6.16667	1.52277	3.4	1.44338	6.24	1.56205	3.91667	1.17646	7.625	1.05552	3.375	2.08123	6.66667	1.85722	性命交关	48	24	24	49	25	24	性命交关	56	28	性	1799.09	8	命	1075.17	8	交	1106.25	6	关	2202.44	6
1720	性命攸关	Adj. life-critical	3.84783	1.60509	6.73913	1.61155	3.73469	1.96612	7.08163	1.64363	4.04545	1.67552	6.36364	1.67745	4.23077	2.08437	6.42308	1.8368	3.66667	1.55106	7.08333	1.50121	3.17391	1.69631	7.82609	0.984063	性命攸关	46	22	24	49	26	23	性命攸关	93	29	性	1799.09	8	命	1075.17	8	攸	1.11455	7	关	2202.44	6
1723	胸无大志	With no ambition at all	2.9375	1.19228	5.375	1.782	5.21569	1.57878	7.13725	1.0958	2.79167	1.17877	5.33333	1.83366	5.38462	1.38786	6.96154	1.18257	3.08333	1.21285	5.41667	1.76725	5.04	1.7673	7.32	0.988264	胸无大志	48	24	24	51	26	25	胸无大志	85	24	胸	74.0283	10	无	1828.92	4	大	6744.01	3	志	664.679	7
1730	虚有其表	Look impressive but lack real worth	3.14583	1.18483	5.14583	1.41406	4.92	1.49612	6.58	1.5265	3.28	1.2083	5	1.47196	4.92	1.38203	6.4	1.60728	3	1.16775	5.30435	1.36298	4.92	1.63095	6.76	1.45144	虚有其表	48	25	23	50	25	25	虚有其表	101	33	虚	136.659	11	有	8648.03	6	其	1873.8	8	表	1854.42	8
1733	学非所用	One does not do what one has learned	3.75	0.651474	5.59091	1.20692	4.16667	2.01413	6.89583	1.43274	3.6087	0.722315	5.91304	0.514609	4.16667	2.07818	6.70833	1.60106	3.90476	0.538958	5.2381	1.6095	4.16667	1.99274	7.08333	1.24819	学非所用	44	23	21	48	24	24	学非所用	75	29	学	4035.57	8	非	678.212	8	所	2259.17	8	用	3246.04	5
1737	血光之灾	Sworn revenge	1.95238	1.02264	7.25714	1.36599	2.92	1.77097	6.64	2.2566	1.7963	1.10538	7.38889	1.50993	2.84	1.72434	6.2	2.34521	2.11765	0.908781	7.11765	1.1941	3	1.84842	7.08	2.11975	血光之灾	105	54	51	50	25	25	血光之灾	48	21	血	332.362	6	光	802.844	6	之	2500.29	2	灾	118.901	7
1738	血口喷人	Make an unfounded attack upon sb.	2.35556	1.00353	6.91111	1.94027	3.84	1.92046	7.16	1.51671	2.22727	1.15189	6.59091	2.42328	4.15385	1.97367	6.92308	1.49461	2.47826	0.845822	7.21739	1.31275	3.5	1.84155	7.41667	1.5299	血口喷人	45	22	23	50	26	24	血口喷人	93	23	血	332.362	6	口	1079.29	3	喷	48.1297	12	人	10357.8	2
1739	血泪斑斑	Blood and tears stained	2.4	1.00575	6.91429	1.20188	3.79592	1.61992	6.61224	1.31998	2.03774	0.783539	7.03774	1.22415	3.75	1.75078	6.41667	1.31601	2.76923	1.07768	6.78846	1.17718	3.84	1.51877	6.8	1.32288	血泪斑斑	105	53	52	49	24	25	血泪斑斑	37	38	血	332.362	6	泪	87.0932	8	斑	36.6991	12	斑	36.6991	12
1743	寻死觅活	Repeatedly attempt suicide	2.66981	1.09302	6.50943	1.16493	4.60784	1.78973	7.09804	1.13587	2.7037	1.19163	6.44444	1.22346	4.37037	1.84283	6.7037	1.20304	2.63462	0.990719	6.57692	1.10872	4.875	1.72734	7.54167	0.883627	寻死觅活	106	54	52	51	27	24	寻死觅活	77	29	寻	164.143	6	死	481.523	6	觅	3.89003	8	活	1400.22	9
1758	颜面扫地	Be thoroughly discredited	2.93478	1.12353	6.30435	1.44329	4.24	1.72094	6.9	1.37396	3.17391	1.26678	5.86957	1.63219	4.28	1.67133	6.6	1.73205	2.69565	0.926125	6.73913	1.09617	4.2	1.80278	7.2	0.816497	颜面扫地	46	23	23	50	25	25	颜面扫地	29	36	颜	34.6163	15	面	2739.19	9	扫	78.0231	6	地	4442.5	6
1759	掩耳盗铃	Deceive oneself	3.32558	1.34024	5.62791	1.32778	5.01923	2.04355	7.34615	1.34142	3.31579	1.45498	5.73684	1.24017	4.75	1.91727	7.10714	1.19689	3.33333	1.27404	5.54167	1.41357	5.33333	2.18028	7.625	1.46888	掩耳盗铃	43	19	24	52	28	24	掩耳盗铃	174	38	掩	53.0512	11	耳	161.511	6	盗	68.7869	11	铃	25.9381	10
1762	眼冒金星	Sparks fly before one's eyes	3.55556	1.13929	5.8	1.32459	3.87755	1.43806	7.04082	1.22405	3	0.932505	5.83333	1.55106	4.12	1.45258	6.64	1.25433	4.19048	1.03049	5.7619	1.04426	3.625	1.40844	7.45833	1.06237	眼冒金星	45	24	21	49	25	24	眼冒金星	80	37	眼	606.508	11	冒	100.707	9	金	1155.2	8	星	711.731	9
1763	雁过拔毛	He rooks everyone he can get his claws into	3.5625	1.1468	5.375	1.9529	4.9375	1.6296	6.16667	2.06628	3.29167	0.954585	5.29167	1.68056	4.875	1.84891	6.75	1.35935	3.83333	1.27404	5.45833	2.22592	5	1.41421	5.58333	2.48328	雁过拔毛	48	24	24	48	24	24	雁过拔毛	35	30	雁	12.607	12	过	2727.03	6	拔	79.9317	8	毛	380.029	4
1764	殃及池鱼	Bring disaster to the fish in the moat	3.10417	1.24182	6.04167	1.39845	3.77083	1.99189	6.70833	1.71301	3.08333	1.41165	6.16667	1.23945	3.96	2.11108	6.12	1.96469	3.125	1.07592	5.91667	1.55806	3.56522	1.87873	7.34783	1.11227	殃及池鱼	48	24	24	48	25	23	殃及池鱼	86	26	殃	1.85282	9	及	1116.87	3	池	72.6967	6	鱼	158.194	8
1765	扬尘而去	Go away with dust	3.78261	1.67216	5.34783	1.77911	5.77551	1.95006	7.08163	1.46965	3.86957	1.91417	5.34783	2.01379	5.45833	1.74404	6.625	1.55515	3.69565	1.42812	5.34783	1.5553	6.08	2.11975	7.52	1.26227	扬尘而去	46	23	23	49	24	25	扬尘而去	7	23	扬	175.527	6	尘	28.7632	6	而	2283.95	6	去	1621.28	5
1769	阳奉阴违	Comply in appearance but oppose in heart	2.49515	1.02779	6.40777	1.41724	4.53191	1.94323	6.93617	1.3089	2.32692	1.06128	6.25	1.64347	5.04167	1.75646	6.75	1.2938	2.66667	0.972968	6.56863	1.13587	4	2.0226	7.13043	1.32474	阳奉阴违	103	52	51	47	24	23	阳奉阴违	315	27	阳	397.791	6	奉	100.157	8	阴	137.841	6	违	75.6593	7
1774	养虎遗患	To rear a tiger is to court calamity	3.14894	1.36698	6.23404	1.47755	3.77083	1.80118	6.375	1.84073	2.91304	1.27611	6.08696	1.83187	4.5	2.06419	6.04167	1.85283	3.375	1.43898	6.375	1.05552	3.04167	1.12208	6.70833	1.80529	养虎遗患	47	23	24	48	24	24	养虎遗患	21	40	养	404.759	9	虎	76.5574	8	遗	99.1723	12	患	122.678	11
1776	妖里妖气	Describe a woman’s attire, frivolity and decent	2.45652	1.16822	6.21739	1.64537	5.16667	1.53447	6.35417	1.88487	2.45455	1.405	5.81818	1.84226	5.47826	1.56291	6.56522	1.67403	2.45833	0.931533	6.58333	1.38051	4.88	1.48099	6.16	2.07525	妖里妖气	46	22	24	48	23	25	妖里妖气	20	25	妖	14.4707	7	里	2015.7	7	妖	14.4707	7	气	1139.89	4
1777	腰酸背痛	Backache	3.1087	1.0377	5.43478	1.24101	4.28	1.87399	7.5	0.952976	3.31818	0.945484	5.31818	1.2868	4.64	1.84572	7.24	0.925563	2.91667	1.10007	5.54167	1.21509	3.92	1.86905	7.76	0.925563	腰酸背痛	46	22	24	50	25	25	腰酸背痛	205	48	腰	57.7591	13	酸	135.598	14	背	202.778	9	痛	230.662	12
1779	杳无消息	Have no news	3.35238	1.074	5.9619	1.33679	3.77083	1.90453	7.125	1.31481	3.40385	1.07118	5.86538	1.06695	3.8	1.87083	6.92	1.52534	3.30189	1.08459	6.0566	1.56174	3.73913	1.98213	7.34783	1.0273	杳无消息	105	52	53	48	25	23	杳无消息	46	32	杳	0.514406	8	无	1828.92	4	消	793.819	10	息	562.906	10
1780	要死要活	Desperate	2.98113	1.17093	6.41509	1.24875	5.0625	1.82659	7.22917	0.95069	3.07547	1.17423	6.35849	1.2724	5.6087	1.64425	7.04348	1.02151	2.88679	1.17113	6.4717	1.23419	4.56	1.87261	7.4	0.866025	要死要活	106	53	53	48	23	25	要死要活	83	33	要	3871.32	9	死	481.523	6	要	3871.32	9	活	1400.22	9
1782	叶公好龙	Lord ye who claimed to be fond of dragons was scared out of his wits when a real one appeared	3.89362	1.53558	5.12766	1.48349	4.6	1.6413	6.62	1.65233	3.48	1.38804	5.12	1.48099	4.61538	1.32897	6.76923	1.30561	4.36364	1.59001	5.13636	1.52114	4.58333	1.95419	6.45833	1.97768	叶公好龙	47	25	22	50	26	24	叶公好龙	79	20	叶	201.762	5	公	2641.25	4	好	1953.46	6	龙	254.841	5
1786	一己私利	Selfish interests	2.93478	1.28931	6.02174	1.43742	5.58	1.6548	6.96	0.988918	2.65217	1.22877	5.6087	1.46905	5.76	1.53514	6.72	1.2083	3.21739	1.31275	6.43478	1.30823	5.4	1.77951	7.2	0.645497	一己私利	46	23	23	50	25	25	一己私利	90	18	一	12712.2	1	己	584.618	3	私	224.845	7	利	1925.1	7
1789	衣冠禽兽	Brutes：dressed-up beasts	2.04	1.03397	7.45	1.3133	4.32653	1.91907	7.02041	1.34613	1.79592	1.11765	7.4898	1.48776	4.8	2.04124	6.84	1.34412	2.27451	0.896179	7.41176	1.13449	3.83333	1.6854	7.20833	1.35066	衣冠禽兽	100	49	51	49	25	24	衣冠禽兽	95	38	衣	137.2	6	冠	51.2229	9	禽	17.9682	12	兽	15.2158	11
1794	贻害无穷	Endless infliction	2.69524	1.16126	6.30476	1.4014	4.60417	1.75935	6.54167	1.51529	2.65385	1.31186	6.11538	1.57995	4.33333	1.46456	6.08333	1.34864	2.73585	1.0029	6.49057	1.18683	4.875	2.00678	7	1.56038	贻害无穷	105	52	53	48	24	24	贻害无穷	74	30	贻	1.57928	9	害	379.521	10	无	1828.92	4	穷	83.3257	7
1797	疑疑惑惑	Confused	3.68085	0.887262	5.19149	1.31278	4.76596	1.54937	6.70213	1.47316	3.54167	1.06237	5.25	1.15156	5.04545	1.67552	6.68182	0.994574	3.82609	0.650327	5.13043	1.48643	4.52	1.41774	6.72	1.81475	疑疑惑惑	47	24	23	47	22	25	疑疑惑惑	70	52	疑	224.997	14	疑	224.997	14	惑	25.6121	12	惑	25.6121	12
1798	以暴易暴	Violence against violence	3.04444	1.20521	6.4	1.65694	4.91837	2.09997	6.14286	1.89297	3.09091	1.1916	5.86364	1.72642	5.16667	2.27781	6	2.06419	3	1.24316	6.91304	1.44326	4.68	1.93046	6.28	1.74452	以暴易暴	45	22	23	49	24	25	以暴易暴	39	42	以	4459.97	4	暴	159.942	15	易	574.346	8	暴	159.942	15
1807	以卵击石	Court defeat by fighting against overwhelming odds	3.57778	1.15776	5.8	1.61808	4.34694	2.16555	7.08163	1.11499	3.31818	1.21052	5.54545	1.87025	4.70833	2.15647	6.75	0.84699	3.82609	1.07247	6.04348	1.3307	4	2.16025	7.4	1.25831	以卵击石	45	22	23	49	24	25	以卵击石	77	21	以	4459.97	4	卵	29.9676	7	击	483.355	5	石	524.158	5
1808	以势压人	To press for people	2.5	1.02299	6.90909	1.41122	4.19149	2.25194	7.14894	0.977546	2.33333	1.01653	6.66667	1.62275	4.3913	2.33041	6.91304	1.08347	2.65217	1.0273	7.13043	1.17954	4	2.20671	7.375	0.824226	以势压人	44	21	23	47	23	24	以势压人	76	20	以	4459.97	4	势	267.427	8	压	357.344	6	人	10357.8	2
1810	以怨报德	Requite love with hate	3.09346	1.79377	6.49533	1.29129	5.08333	2.07142	7.22917	1.22456	3.03774	1.89089	6.41509	1.46016	5.58333	2.01983	7.08333	1.10007	3.14815	1.7091	6.57407	1.10917	4.58333	2.04124	7.375	1.34528	以怨报德	107	53	54	48	24	24	以怨报德	98	35	以	4459.97	4	怨	47.4649	9	报	2394.79	7	德	831.45	15
1818	抑郁寡欢	Be gloomy of disposition and sullen of temper	3.25	1.04748	5.06522	1.58328	4.38	1.83937	7.28	1.05056	3.36	1.31909	4.76	1.50776	5.03846	1.77721	7.07692	0.844894	3.11905	0.589592	5.42857	1.63007	3.66667	1.6594	7.5	1.21584	抑郁寡欢	46	25	21	50	26	24	抑郁寡欢	60	35	抑	25.8197	7	郁	25.6673	8	寡	15.537	14	欢	332.901	6
1827	阴阴森森	Shady	2.79167	1.09074	5.79167	1.54312	3.6383	1.24106	6.87234	1.15377	2.6	1.1547	5.56	1.80462	3.875	1.15392	6.33333	1.16718	3	1	6.04348	1.18622	3.3913	1.3052	7.43478	0.843482	阴阴森森	48	25	23	47	24	23	阴阴森森	5	36	阴	137.841	6	阴	137.841	6	森	34.0175	12	森	34.0175	12
1828	阴雨连绵	A run of wet weather	3.70833	1.32019	5.1875	1.43892	3.58	1.73899	7.48	0.931095	3.72	1.33915	5.32	1.31403	3.48148	1.94877	7.51852	0.893152	3.69565	1.32921	5.04348	1.58051	3.69565	1.49042	7.43478	0.992063	阴雨连绵	48	25	23	50	27	23	阴雨连绵	192	32	阴	137.841	6	雨	172.54	8	连	505.817	7	绵	16.6896	11
1829	音信全无	Have not heard from sb. ever since	2.95833	1.25407	6.02083	1.56409	3.13043	1.48487	7.17391	1.28762	2.64	1.18603	6.16	1.86369	2.91667	1.24819	6.66667	1.40393	3.30435	1.25896	5.86957	1.17954	3.36364	1.70561	7.72727	0.882735	音信全无	48	25	23	46	24	22	音信全无	51	28	音	533.815	9	信	1302.01	9	全	2321.82	6	无	1828.92	4
1834	英雄气短	A good man caught in difficult circumstances	3.875	1.2123	5.81731	1.13859	4.28571	1.62019	6.5102	1.67235	4.21154	1.24202	5.61538	1.14024	4.88	1.66633	6.16	1.8412	3.53846	1.09296	6.01923	1.11127	3.66667	1.34056	6.875	1.42379	英雄气短	104	52	52	49	25	24	英雄气短	94	36	英	619.981	8	雄	162.067	12	气	1139.89	4	短	224.705	12
1838	庸庸碌碌	Ordinary	3.44681	1.15737	4.82979	1.61944	5.07843	1.79826	6.88235	1.49194	3.65217	1.11227	5.21739	1.0853	5.34615	1.38397	6.23077	1.7276	3.25	1.18872	4.45833	1.95558	4.8	2.14087	7.56	0.768115	庸庸碌碌	47	23	24	51	26	25	庸庸碌碌	189	48	庸	17.449	11	庸	17.449	11	碌	10.595	13	碌	10.595	13
1841	永无宁日	Never will there be days of peace	2.41584	0.972289	6.59406	1.45037	3.59184	2.05059	6.61224	1.81218	2.4	1.04978	6.46	1.72863	3.66667	2.03591	6.5	1.71945	2.43137	0.900109	6.72549	1.11496	3.52	2.10396	6.72	1.92614	永无宁日	101	50	51	49	24	25	永无宁日	85	18	永	206.638	5	无	1828.92	4	宁	284.092	5	日	3252.04	4
1845	用心险恶	Evil intentions	2.43617	1.27951	6.19149	1.76485	3.81633	1.70384	6.87755	1.45248	1.92	0.996661	6.2	1.97906	3.91667	1.95419	6.5	1.61515	3.02273	1.33164	6.18182	1.53177	3.72	1.45831	7.24	1.2	用心险恶	47	25	22	49	24	25	用心险恶	46	28	用	3246.04	5	心	2318.57	4	险	391.019	9	恶	188.285	10
1855	犹豫不前	Hesitant	3.4375	0.987286	5.25	1.61772	5.41667	1.79637	7.22917	0.994444	3.33333	0.963087	5.33333	1.40393	5.91304	1.34547	7.08696	1.04067	3.54167	1.02062	5.16667	1.83366	4.96	2.05102	7.36	0.95219	犹豫不前	48	24	24	48	23	25	犹豫不前	22	35	犹	92.8225	7	豫	38.6785	15	不	9822.27	4	前	2101.23	9
1856	油头粉面	Coquettish	3.27083	1.4253	5.5625	1.5424	5.29167	1.44338	6.83333	1.44889	3.16667	1.37261	5.33333	1.55106	5.125	1.39292	6.625	1.24455	3.375	1.49819	5.79167	1.53167	5.45833	1.50302	7.04167	1.62799	油头粉面	48	24	24	48	24	24	油头粉面	94	32	油	329.102	8	头	1198.71	5	粉	111.631	10	面	2739.19	9
1857	油头滑脑	Slick	2.75248	0.963389	6.0099	1.09995	5.24	1.5194	6.78	1.40393	2.58491	1.00831	5.84906	1.37835	5.12	1.48099	6.52	1.35769	2.9375	0.885011	6.1875	0.641018	5.36	1.57797	7.04	1.42829	油头滑脑	101	53	48	50	25	25	油头滑脑	26	35	油	329.102	8	头	1198.71	5	滑	96.9915	12	脑	314.9	10
1862	有口难言	Words can not be spoken; hard to tell the truth	3.58	0.955368	5.7	1.21854	4.22449	1.88487	7.12245	1.18379	3.97917	0.933754	5.5	0.87519	4.64	1.84572	6.84	1.1431	3.21154	0.824539	5.88462	1.45054	3.79167	1.86452	7.41667	1.17646	有口难言	100	48	52	49	25	24	有口难言	92	26	有	8648.03	6	口	1079.29	3	难	719.944	10	言	674.584	7
1866	有始无终	Doing things can't stick to the end	3.26531	1.65549	5.61224	1.64337	5.04082	1.99957	7.26531	1.22092	3.32	2.01494	5.56	1.73397	5.79167	1.84106	7.20833	0.883627	3.20833	1.21509	5.66667	1.57885	4.32	1.90875	7.32	1.4922	有始无终	49	25	24	49	24	25	有始无终	88	26	有	8648.03	6	始	662.015	8	无	1828.92	4	终	386.994	8
1868	有头无尾	Having a beginning but no end	3.25532	1.30996	5.68085	1.73339	4.97917	1.61758	6.91667	1.49941	3	1.12815	5.08696	1.67639	5.16667	1.46456	6.58333	1.31601	3.5	1.44463	6.25	1.62186	4.79167	1.76879	7.25	1.62186	有头无尾	47	23	24	48	24	24	有头无尾	77	22	有	8648.03	6	头	1198.71	5	无	1828.92	4	尾	77.1902	7
1870	鱼肉百姓	Cruelly oppress and exploit the common people	2.36634	1.23063	6.66337	1.64485	3.59184	1.99915	6.91837	1.41181	2.05769	1.17846	6.40385	1.87093	3.61538	1.94066	6.53846	1.36325	2.69388	1.21113	6.93878	1.32929	3.56522	2.10683	7.34783	1.36877	鱼肉百姓	101	52	49	49	26	23	鱼肉百姓	77	28	鱼	158.194	8	肉	163.063	6	百	560.83	6	姓	146.341	8
1872	鱼死网破	Desperate	3.23301	1.26958	6.53398	1.20306	4.45833	2.09313	7.08333	1.58226	3.12	1.40901	6.64	1.36666	4.66667	2.18028	6.66667	1.78561	3.33962	1.12563	6.43396	1.02862	4.25	2.02699	7.5	1.25109	鱼死网破	103	50	53	48	24	24	鱼死网破	70	30	鱼	158.194	8	死	481.523	6	网	786.396	6	破	408.047	10
1884	雨雪交加	Rain and snow	3.77551	1.34265	6.04082	1.52697	3.16327	1.68754	7.53061	1.00212	3.96	1.24097	5.92	1.6052	2.45833	1.5598	7.29167	1.0417	3.58333	1.44212	6.16667	1.46456	3.84	1.54596	7.76	0.925563	雨雪交加	49	25	24	49	24	25	雨雪交加	71	30	雨	172.54	8	雪	141.883	11	交	1106.25	6	加	1892.76	5
1885	语无伦次	Ramble in one's statement	3.19149	1.0558	5.80851	1.70215	4.91489	1.6659	7.14894	0.977546	3	1.14208	5.5	1.64184	5.17391	1.6693	6.86957	0.694416	3.3913	0.940944	6.13043	1.74002	4.66667	1.6594	7.41667	1.1389	语无伦次	47	24	23	47	23	24	语无伦次	529	25	语	255.897	9	无	1828.92	4	伦	79.8725	6	次	1204.15	6
1891	欲加之罪	Framing others at will	2.85714	1.17202	6.67619	1.04233	3.63462	1.89973	6.71154	1.64896	2.83019	1.26697	6.71698	1.21493	3.59259	1.62337	6.55556	1.42325	2.88462	1.07838	6.63462	0.840841	3.68	2.19317	6.88	1.87794	欲加之罪	105	53	52	52	27	25	欲加之罪	97	31	欲	119.715	11	加	1892.76	5	之	2500.29	2	罪	315.23	13
1894	冤假错案	Injustice and false case	2.19231	1.23128	7.14423	1.41021	3.44681	2.12448	7.3617	1.00921	2.25	1.50652	7.01923	1.54019	4.08333	2.56933	7.125	0.946963	2.13462	0.886253	7.26923	1.26979	2.78261	1.27766	7.6087	1.03305	冤假错案	104	52	52	47	24	23	冤假错案	396	44	冤	21.369	10	假	289.79	11	错	245.437	13	案	503.546	10
1898	怨气冲天	One's wrath rose to the sky	2.62745	1.13383	6.72549	1.25987	4.77551	1.93934	7.12245	1.49489	2.82353	1.35212	6.37255	1.38507	5.125	1.87228	6.625	1.83712	2.43137	0.83078	7.07843	1.01672	4.44	1.98074	7.6	0.866025	怨气冲天	102	51	51	49	24	25	怨气冲天	79	23	怨	47.4649	9	气	1139.89	4	冲	255.455	6	天	2247.5	4
1899	怨天怨地	Extremely complains	2.67327	1.00109	6.40594	1.18472	4.91667	1.89998	7.04167	1.23699	2.84615	1.03629	6.23077	1.19829	5.25	1.70038	6.66667	1.40393	2.4898	0.938138	6.59184	1.15323	4.58333	2.06243	7.41667	0.928611	怨天怨地	101	52	49	48	24	24	怨天怨地	30	28	怨	47.4649	9	天	2247.5	4	怨	47.4649	9	地	4442.5	6
1902	月黑风高	On a dark and windy night	3.95652	1.5049	6.04348	1.36555	3.4375	1.68733	6.95833	1.21967	3.73913	1.48377	5.65217	1.40158	2.91667	1.66594	6.70833	1.23285	4.17391	1.52709	6.43478	1.23679	3.95833	1.57367	7.20833	1.17877	月黑风高	46	23	23	48	24	24	月黑风高	94	30	月	1839.86	4	黑	323.568	12	风	877.382	4	高	2199.88	10
1906	晕头晕脑	Dizziness	3.22449	1.02602	5.59184	1.20621	4.22917	1.78933	7.3125	0.970989	3.2	1.11803	5.8	1.1547	4.95833	1.89918	7.125	0.899879	3.25	0.944089	5.375	1.24455	3.5	1.35133	7.5	1.02151	晕头晕脑	49	25	24	48	24	24	晕头晕脑	31	35	晕	22.8006	10	头	1198.71	5	晕	22.8006	10	脑	314.9	10
1907	晕晕乎乎	Dizzy	3.80435	1.02458	4.58696	1.32625	4	1.26491	7.21739	1.03092	3.33333	1.09014	4.79167	1.444	4.68182	1.42716	6.72727	0.7025	4.31818	0.646335	4.36364	1.17698	3.375	0.646899	7.66667	1.09014	晕晕乎乎	46	24	22	46	22	24	晕晕乎乎	84	30	晕	22.8006	10	晕	22.8006	10	乎	161.415	5	乎	161.415	5
1908	晕晕忽忽	Halo and neglect	3.71739	0.77926	5.30435	1.22691	4.28571	1.62019	6.95918	1.3379	3.79167	0.883627	5.29167	0.954585	4.625	1.63687	6.45833	1.21509	3.63636	0.657952	5.31818	1.49241	3.96	1.56738	7.44	1.29357	晕晕忽忽	46	24	22	49	24	25	晕晕忽忽	12	36	晕	22.8006	10	晕	22.8006	10	忽	135.535	8	忽	135.535	8
1912	杂七杂八	Miscellaneous	3.78723	1.12165	5	1.36732	4.91667	1.51353	6.9375	1.03977	3.91304	1.12464	5.13043	1.35862	4.56522	1.47174	6.56522	1.07982	3.66667	1.12932	4.875	1.39292	5.24	1.50776	7.28	0.890693	杂七杂八	47	23	24	48	23	25	杂七杂八	209	16	杂	270.984	6	七	238.784	2	杂	270.984	6	八	368.864	2
1913	砸锅卖铁	Smash one's iron pots and pans into pieces and sell them as scrapped iron	3.46809	1.2485	6.02128	1.53919	4.7451	2.20765	7.15686	1.39101	3.08	1.25565	6.04	1.7195	4.69231	2.20489	7.30769	0.970329	3.90909	1.1088	6	1.34519	4.8	2.25462	7	1.73205	砸锅卖铁	47	25	22	51	26	25	砸锅卖铁	100	40	砸	10.7658	10	锅	50.9712	12	卖	240.384	8	铁	327.13	10
1914	咋咋呼呼	Nervous and jumpy	3.30612	1.06466	6.08163	1.56574	4.98039	1.67917	7.13725	1.18355	3.04	0.934523	6.04	1.51327	4.85185	1.70302	7.07407	0.916764	3.58333	1.1389	6.125	1.6501	5.125	1.67624	7.20833	1.444	咋咋呼呼	49	25	24	51	27	24	咋咋呼呼	37	32	咋	4.31122	8	咋	4.31122	8	呼	243.298	8	呼	243.298	8
1915	咋咋唬唬	Nervous and jumpy	3.23913	1.15825	5.97826	1.27348	5.4898	1.37117	6.79592	1.55429	3.09091	1.06499	5.63636	1.46533	5.84	1.21381	6.76	1.05198	3.375	1.24455	6.29167	0.999094	5.125	1.454	6.83333	1.9708	咋咋唬唬	46	22	24	49	25	24	咋咋唬唬	15	38	咋	4.31122	8	咋	4.31122	8	唬	8.47478	11	唬	8.47478	11
1922	贼喊捉贼	Play the trick of a thief crying "stop thief	2.5	1.1987	6.70192	1.45402	4.69388	1.63559	6.95918	1.44279	2.51923	1.2601	6.69231	1.3938	4.95833	1.80529	6.75	1.15156	2.48077	1.14601	6.71154	1.52543	4.44	1.44568	7.16	1.67531	贼喊捉贼	104	52	52	49	24	25	贼喊捉贼	97	42	贼	34.6578	10	喊	72.485	12	捉	31.8599	10	贼	34.6578	10
1923	贼头贼脑	Act sneaky	2.74528	1.12174	5.98113	1.33795	4.97872	1.59468	6.91489	1.28249	2.48148	1.14498	6.27778	1.50993	4.30435	1.4596	6.65217	1.07063	3.01923	1.03829	5.67308	1.06128	5.625	1.46888	7.16667	1.43456	贼头贼脑	106	54	52	47	23	24	贼头贼脑	46	35	贼	34.6578	10	头	1198.71	5	贼	34.6578	10	脑	314.9	10
1924	贼心不死	Not to give up one's gangster designs	2.48889	1.16037	6.13333	1.61808	4.70833	1.85608	6.89583	1.09621	2.45455	1.26217	5.86364	1.98315	4.43478	1.77933	6.78261	1.0853	2.52174	1.08165	6.3913	1.15755	4.96	1.92527	7	1.11803	贼心不死	45	22	23	48	23	25	贼心不死	68	24	贼	34.6578	10	心	2318.57	4	不	9822.27	4	死	481.523	6
1927	斩尽杀绝	Kill all	1.90909	1.09583	7.63636	1.79263	3.41667	2.314	7.10417	1.41781	1.61905	1.07127	7.57143	2.20389	3.79167	2.70232	6.83333	1.34056	2.17391	1.07247	7.69565	1.36298	3.04167	1.82921	7.375	1.46888	斩尽杀绝	44	21	23	48	24	24	斩尽杀绝	148	29	斩	15.3254	8	尽	407.054	6	杀	224.641	6	绝	360.979	9
1929	占山为王	Occupy a hill to act as a lord	3.86538	1.50764	6.10577	1.20612	4.625	2.30287	7.10417	1.13437	3.37255	1.34106	6.09804	1.23701	4.125	2.32776	6.75	0.944089	4.33962	1.51839	6.11321	1.18744	5.125	2.21286	7.45833	1.21509	占山为王	104	51	53	48	24	24	占山为王	69	16	占	319.818	5	山	1013.65	3	为	5620.72	4	王	635.053	4
1930	战争贩子	War trafficker	2.27619	1.25954	6.79048	1.73036	3.74	1.70006	5.8	2.29463	1.85185	1.20388	7.01852	2.03266	4	2.0199	6.26923	2.12711	2.72549	1.16753	6.54902	1.31626	3.45833	1.25036	5.29167	2.40433	战争贩子	105	54	51	50	26	24	战争贩子	103	26	战	1502.44	9	争	891.82	6	贩	39.4474	8	子	3348.01	3
1931	战争狂人	War maniac	2.59804	1.35894	6.83333	1.54204	3.14583	1.66298	6.9375	1.44996	2	1.21655	7.15686	1.59214	3.12	1.96469	6.64	1.41067	3.19608	1.2332	6.5098	1.43349	3.17391	1.30217	7.26087	1.45282	战争狂人	102	51	51	48	25	23	战争狂人	72	24	战	1502.44	9	争	891.82	6	狂	87.3273	7	人	10357.8	2
1937	招降纳叛	Recruit deserters and traitors	3.77083	1.70406	6.33333	1.37351	4.93878	1.94088	5.91837	2.30793	3.16	1.772	6.56	1.29357	4.66667	2.14003	6.20833	2.04257	4.43478	1.37597	6.08696	1.44326	5.2	1.73205	5.64	2.54755	招降纳叛	48	25	23	49	24	25	招降纳叛	53	32	招	207.341	8	降	324.115	8	纳	93.3178	7	叛	21.9371	9
1938	招惹是非	Provoke the wrong	2.96226	0.935282	6.17925	1.42626	5.16	1.7884	7.12	1.13641	2.9434	0.948989	5.98113	1.58709	5.34615	1.67194	6.88462	1.03255	2.98113	0.930065	6.37736	1.22829	4.95833	1.92194	7.375	1.20911	招惹是非	106	53	53	50	26	24	招惹是非	65	37	招	207.341	8	惹	15.8364	12	是	9027.33	9	非	678.212	8
1940	招灾惹祸	Court disaster	2.82	0.92529	6.48	1.09618	4.18	1.84822	7.12	1.22291	2.67347	0.987162	6.5102	1.24369	4.61538	1.91994	7.19231	0.980581	2.96078	0.847603	6.45098	0.944748	3.70833	1.68056	7.04167	1.45898	招灾惹祸	100	49	51	50	26	24	招灾惹祸	34	38	招	207.341	8	灾	118.901	7	惹	15.8364	12	祸	38.92	11
1945	遮人耳目	Cover up the eyes and ears of others	3.47619	0.971668	5.66667	1.03466	5	1.79323	7.13462	1.20504	3.43396	0.990521	5.69811	0.8224	5.03704	1.55617	6.85185	1.37851	3.51923	0.959787	5.63462	1.2212	4.96	2.05102	7.44	0.916515	遮人耳目	105	53	52	52	27	25	遮人耳目	69	27	遮	23.8464	14	人	10357.8	2	耳	161.511	6	目	1386.17	5
1947	遮遮掩掩	Cover up	3.3913	0.93043	5.73913	1.12417	5.42	1.70342	7.2	1.39971	3.17391	0.886883	5.95652	1.14726	5.52	1.68622	6.72	1.59478	3.6087	0.940944	5.52174	1.08165	5.32	1.74929	7.68	0.988264	遮遮掩掩	46	23	23	50	25	25	遮遮掩掩	349	50	遮	23.8464	14	遮	23.8464	14	掩	53.0512	11	掩	53.0512	11
1951	争名夺利	Struggle for fame and gain	3.06383	1.42041	6.40426	1.19163	5.2766	2.06105	7.23404	1.10754	2.8	1.35401	6.32	1.40594	5.875	1.77697	7.04167	1.16018	3.36364	1.46533	6.5	0.912871	4.65217	2.18692	7.43478	1.03687	争名夺利	47	25	22	47	24	23	争名夺利	99	25	争	891.82	6	名	1361.14	6	夺	146.877	6	利	1925.1	7
1952	争争吵吵	Fight; quarrel	3.16822	1.12002	6.19626	1.12802	4.93878	1.80749	7.22449	0.918906	3.24528	1.12499	6.16981	1.22059	5.04167	1.62799	6.75	0.896854	3.09259	1.12045	6.22222	1.04008	4.84	1.99332	7.68	0.690411	争争吵吵	107	53	54	49	24	25	争争吵吵	47	26	争	891.82	6	争	891.82	6	吵	26.8049	7	吵	26.8049	7
1960	政治骗子	Political liar	2.21905	1.08292	6.99048	1.42434	3.5625	1.73703	6.0625	2.00432	1.92453	0.977616	7.11321	1.52745	3.66667	1.63299	6.375	1.1726	2.51923	1.11127	6.86538	1.31401	3.45833	1.86452	5.75	2.57496	政治骗子	105	53	52	48	24	24	政治骗子	88	32	政	1465.79	9	治	1158.93	8	骗	72.4918	12	子	3348.01	3
1962	支吾其词	Prevaricate	3.97826	1.08503	5.02174	1.18301	5.125	1.34678	6.58333	1.35007	3.81818	1.00647	5.09091	1.1916	5.47826	1.23838	6.13043	1.14035	4.125	1.15392	4.95833	1.19707	4.8	1.38444	7	1.41421	支吾其词	46	22	24	48	23	25	支吾其词	63	26	支	592.059	4	吾	8.96877	7	其	1873.8	8	词	203.189	7
1963	支吾其辞	Hesitate to speak	3.47917	1.2546	5.45833	1.35204	5.3125	1.3072	6.35417	1.81588	3.45833	0.931533	5.20833	1.35066	5.58333	1.05981	6.16667	1.49395	3.5	1.53226	5.70833	1.33447	5.04167	1.48848	6.54167	2.10546	支吾其辞	48	24	24	48	24	24	支吾其辞	24	32	支	592.059	4	吾	8.96877	7	其	1873.8	8	辞	93.5186	13
1964	吱吱扭扭	Squeaky twisting	3.55102	1.1004	5.20408	1.369	5.1875	1.14216	6.22917	1.82465	3.42308	1.10175	5.23077	1.24283	5.58333	1.05981	6.54167	1.14129	3.69565	1.10514	5.17391	1.52709	4.79167	1.10253	5.91667	2.30154	吱吱扭扭	49	26	23	48	24	24	吱吱扭扭	5	28	吱	7.42147	7	吱	7.42147	7	扭	40.2367	7	扭	40.2367	7
1965	吱吱喳喳	A squeaky chirp	3.6875	1.22312	5.3125	1.32338	4.77083	1.38748	6.52083	1.70093	3.52	1.29486	5.32	1.21518	5.04348	1.22394	6.34783	1.36877	3.86957	1.14035	5.30435	1.4596	4.52	1.50333	6.68	1.97315	吱吱喳喳	48	25	23	48	23	25	吱吱喳喳	102	38	吱	7.42147	7	吱	7.42147	7	喳	5.15019	12	喳	5.15019	12
1969	知情不报	Fail to report the facts	3.02041	1.01015	6.20408	1.369	5.44898	1.69633	7.02041	0.923981	2.96	1.0198	6.2	1.1547	5.54167	1.76879	6.91667	0.775532	3.08333	1.01795	6.20833	1.58743	5.36	1.65529	7.12	1.05357	知情不报	49	25	24	49	24	25	知情不报	68	30	知	1298.23	8	情	1729.84	11	不	9822.27	4	报	2394.79	7
1980	直眉瞪眼	Stare in anger	3.29545	1.13259	6.31818	1.25333	5.41667	1.79637	7.10417	1.09621	3.28571	0.902378	5.71429	1.23056	5.375	1.78916	6.95833	0.999094	3.30435	1.32921	6.86957	1.01374	5.45833	1.84106	7.25	1.18872	直眉瞪眼	44	21	23	48	24	24	直眉瞪眼	38	45	直	836.062	8	眉	26.0245	9	瞪	13.6495	17	眼	606.508	11
1990	志大才疏	Have great ambition but little talent	3.72917	1.45485	5.4375	1.16521	4.66667	1.70523	6.60417	1.68522	3.44	1.15758	5.64	1.11355	5.04348	1.55149	6.08696	1.67639	4.04348	1.69164	5.21739	1.20441	4.32	1.79629	7.08	1.57903	志大才疏	48	25	23	48	23	25	志大才疏	42	25	志	664.679	7	大	6744.01	3	才	741.691	3	疏	18.9915	12
2012	株连九族	Implicate the nine generations of a family	1.92079	1.06474	7.48515	1.3756	2.30435	1.39634	6.97826	1.83169	2	1.2454	7.44	1.41652	2.45455	1.53459	7.09091	0.971454	1.84314	0.857264	7.52941	1.34689	2.16667	1.27404	6.875	2.38314	株连九族	101	50	51	46	22	24	株连九族	35	30	株	20.9131	10	连	505.817	7	九	331.713	2	族	602.862	11
2015	抓耳挠腮	To tweak one’s ears and scratch one’s cheeks	3.95918	1.24095	5.40816	1.30573	5.5102	1.98035	7.10204	1.46123	3.72	1.02144	5.52	1.35769	5.8	1.73205	6.76	1.3626	4.20833	1.41357	5.29167	1.26763	5.20833	2.2063	7.45833	1.50302	抓耳挠腮	49	25	24	49	25	24	抓耳挠腮	148	35	抓	182.991	7	耳	161.511	6	挠	13.0793	9	腮	5.52239	13
2021	装傻充愣	Act dumb	3.4	1.17551	5.31111	1.92852	5.64583	1.70718	7.3125	1.0946	3.36364	1.21677	5.04545	1.96341	5.73913	1.35571	6.82609	0.777652	3.43478	1.16096	5.56522	1.90278	5.56	2.00167	7.76	1.16476	装傻充愣	45	22	23	48	23	25	装傻充愣	47	43	装	700.949	12	傻	25.0038	13	充	354.884	6	愣	8.35502	12
2027	龇牙咧嘴	Show one's teeth (look fierce)	3.46023	1.41263	5.83523	1.30367	5.47619	2.02711	7.16667	1.03398	3.04348	1.17296	5.91304	1.13188	5.31818	2.23365	7	1.02353	3.91667	1.52186	5.75	1.4785	5.65	1.81442	7.35	1.03999	龇牙咧嘴	88	46	42	42	22	20	龇牙咧嘴	237	43	龇	1.12203	14	牙	157.828	4	咧	3.26675	9	嘴	97.4276	16
2031	自命清高	Actingas if one is morally better than other people	3.46739	1.30469	5.51087	1.55128	5.8125	1.59329	7.10417	0.880995	3.26667	1.13618	5.06667	1.6706	5.69565	1.49042	6.86957	0.967863	3.65957	1.4337	5.93617	1.3089	5.92	1.70587	7.32	0.748331	自命清高	92	45	47	48	23	25	自命清高	81	35	自	3316.74	6	命	1075.17	8	清	730.146	11	高	2199.88	10
2038	恣意妄为	To act willfully and wildly	2.61702	1.29469	6.57447	1.22908	4.67347	1.9726	6.77551	1.89589	2.13043	1.01374	6.69565	1.32921	4.79167	1.66757	6.20833	2.14637	3.08333	1.38051	6.45833	1.14129	4.56	2.2561	7.32	1.46401	恣意妄为	47	23	24	49	24	25	恣意妄为	99	33	恣	1.44456	10	意	1962.75	13	妄	11.5973	6	为	5620.72	4
2049	钻来钻去	Drills	3.85106	1.14168	5.14894	1.23321	5.89796	1.59746	7.08163	1.2389	3.58333	0.974308	5.16667	1.27404	5.36	1.68028	6.76	1.3626	4.13043	1.25424	5.13043	1.21746	6.45833	1.31807	7.41667	1.01795	钻来钻去	47	24	23	49	25	24	钻来钻去	102	32	钻	52.8464	10	来	4682.8	7	钻	52.8464	10	去	1621.28	5
2050	罪恶滔天	Be guilty of the most heinous crimes	1.78641	0.903701	7.60194	1.20733	4.17021	2.08847	7.40426	1.01424	1.5098	0.758223	7.76471	1.17624	4.08696	2.3338	7.30435	1.10514	2.05769	0.958214	7.44231	1.22736	4.25	1.87083	7.5	0.932505	罪恶滔天	103	51	52	47	23	24	罪恶滔天	74	40	罪	315.23	13	恶	188.285	10	滔	9.43759	13	天	2247.5	4
2051	罪恶昭彰	Guilty of flagrant crimes	2.21277	1.1021	7.06383	1.48037	4.08333	1.86608	6.27083	1.71029	1.875	1.1156	7.16667	1.57885	4.20833	1.81729	5.83333	1.94862	2.56522	0.992063	6.95652	1.39734	3.95833	1.94443	6.70833	1.33447	罪恶昭彰	47	24	23	48	24	24	罪恶昭彰	32	46	罪	315.23	13	恶	188.285	10	昭	6.31441	9	彰	9.79073	14
2052	罪责难逃	One cannot shirk responsibility for one's crimes	3.65957	1.78492	6	1.92241	3.44681	1.7546	7.06383	1.05097	3.6	2.21736	5.88	2.26053	3.33333	1.6854	6.875	1.1156	3.72727	1.16217	6.13636	1.4895	3.56522	1.85438	7.26087	0.963771	罪责难逃	47	25	22	47	24	23	罪责难逃	78	40	罪	315.23	13	责	306.733	8	难	719.944	10	逃	106.295	9
2057	左右两难	About dilemma	3.47917	1.18483	5.77083	1.47662	3.77083	1.62742	7.27083	0.961815	3.24	1.2	5.96	1.09848	4.17391	1.58551	6.91304	0.792754	3.73913	1.13688	5.56522	1.80469	3.4	1.60728	7.6	1	左右两难	48	25	23	48	23	25	左右两难	17	27	左	258.31	5	右	241.119	5	两	1025.77	7	难	719.944	10
2058	作贼心虚	Guilty conscience	3.02128	1.25956	5.93617	1.42041	4.2449	1.73842	7.34694	1.07143	3.08696	1.37883	5.52174	1.70213	4.53846	1.67883	7.11538	1.17735	2.95833	1.16018	6.33333	0.963087	3.91304	1.78155	7.6087	0.891328	作贼心虚	47	23	24	49	26	23	作贼心虚	102	32	作	4031.82	7	贼	34.6578	10	心	2318.57	4	虚	136.659	11
2061	坐井观天	Limited outlook	3.74468	1.15096	5.3617	1.42074	4.04082	1.82528	7.08163	0.885925	3.83333	1.34056	5.75	1.18872	4.04167	1.75646	6.83333	0.916831	3.65217	0.934622	4.95652	1.55149	4.04	1.92527	7.32	0.802081	坐井观天	47	24	23	49	24	25	坐井观天	86	21	坐	208.754	7	井	80.8748	4	观	879.674	6	天	2247.5	4
6	挨门逐户	From house to house	4.72596	0.790968	5.05769	1.05045	5.18	1.80351	6.5	1.54193	4.98077	0.699871	4.94231	0.802287	5.12	2.00666	6.68	1.21518	4.47115	0.800817	5.17308	1.24808	5.24	1.61452	6.32	1.81934	挨门逐户	104	52	52	50	25	25	挨门逐户	35	27	挨	25.0453	10	门	1206.79	3	逐	115.973	10	户	381.035	4
8	爱才如命	Cherish talents very much	5.22115	2.14049	6.13462	1.20724	5.71429	1.77951	7.16327	1.23063	4.45283	2.18003	5.98113	1.40727	5.5	1.7693	6.875	1.07592	6.01961	1.79433	6.29412	0.944333	5.92	1.80093	7.44	1.32539	爱才如命	104	53	51	49	24	25	爱才如命	31	27	爱	637.994	10	才	741.691	3	如	1955.83	6	命	1075.17	8
15	爱屋及乌	Love me, love my dog	5.82979	1.2392	5.53191	1.44239	6.14583	1.55727	6.91667	1.31818	5.95652	0.824525	4.91304	1.47442	5.70833	1.68056	6.41667	1.55806	5.70833	1.5458	6.125	1.15392	6.58333	1.31601	7.41667	0.775532	爱屋及乌	47	23	24	48	24	24	爱屋及乌	149	26	爱	637.994	10	屋	184.974	9	及	1116.87	3	乌	42.116	4
19	安分守己	Remain in one's proper sphere	5.9434	1.1533	4.75472	1.64931	6.36735	1.90059	7.5102	1.12031	6.27273	1.1778	5.07273	1.7832	6.2	1.93649	7.48	1.00499	5.58824	1.02326	4.41176	1.43075	6.54167	1.8877	7.54167	1.25036	安分守己	106	55	51	49	25	24	安分守己	547	19	安	1119.42	6	分	3077.2	4	守	239.788	6	己	584.618	3
22	安身立命	One's life has the whereabouts and one's spirit has its entrustment	5.02222	0.865734	5.42222	1.09729	5.24	1.96458	6.94	1.40567	4.90909	1.01929	5.45455	0.670982	4.76	1.87705	6.64	1.49666	5.13043	0.694416	5.3913	1.4058	5.72	1.96893	7.24	1.26754	安身立命	45	22	23	50	25	25	安身立命	397	26	安	1119.42	6	身	1129.97	7	立	1499.57	5	命	1075.17	8
25	鞍前马后	Follow around	5.71739	1.16739	5.58696	1.30939	4.74	1.98782	7.2	1.2289	5.68182	1.12911	5.68182	1.12911	5	2.14834	7	1.35873	5.75	1.22474	5.5	1.47442	4.43478	1.77933	7.43478	1.03687	鞍前马后	46	22	24	50	27	23	鞍前马后	63	33	鞍	13.41	15	前	2101.23	9	马	1026.99	3	后	2743.81	6
26	按部就班	Follow the prescribed order	5.71111	1.07919	4.88889	1.68175	6.29167	1.79785	7.375	1.12278	5.72727	0.935125	5.09091	1.4445	5.92	1.82392	7.04	1.20692	5.69565	1.22232	4.69565	1.8934	6.69565	1.71715	7.73913	0.915393	按部就班	45	22	23	48	25	23	按部就班	592	41	按	336.192	9	部	3004.59	10	就	2333.69	12	班	262.181	10
27	案头工作	Deskwork	4.90698	0.750046	4.67442	1.28584	5.04082	1.73156	6.30612	1.74647	5.1	0.307794	5.05	0.223607	4.95833	1.65448	6.33333	1.49395	4.73913	0.963771	4.34783	1.69515	5.12	1.83303	6.28	1.98997	案头工作	43	20	23	49	24	25	案头工作	83	25	案	503.546	10	头	1198.71	5	工	3526.41	3	作	4031.82	7
28	暗度陈仓	Do one thing under cover of another	4.45349	1.6425	5.94186	1.39203	4.84783	1.94328	6.65217	1.63595	4.33333	1.55212	5.6	1.21356	4.77273	2.18069	6.72727	1.20245	4.58537	1.74608	6.31707	1.49062	4.91667	1.74248	6.58333	1.97631	暗度陈仓	86	45	41	46	22	24	暗度陈仓	62	33	暗	149.673	13	度	1580.01	9	陈	227.724	7	仓	38.9711	4
30	暗送秋波	Make eyes at a man	5.34314	1.45898	5.86275	1.11727	6.31818	1.47495	7.45455	1.02196	4.98	1.26958	5.64	0.827092	6.31818	1.17053	7.31818	0.893701	5.69231	1.55347	6.07692	1.31128	6.31818	1.75625	7.59091	1.14056	暗送秋波	102	50	52	44	22	22	暗送秋波	80	39	暗	149.673	13	送	318.571	9	秋	142.529	9	波	347.556	8
32	凹凹凸凸	Concave-convex	4.47826	0.752452	4.67391	1.2833	4.34783	1.07945	6.30435	1.91914	4.6087	0.583027	4.73913	0.810016	4	1.12815	6.34783	1.36877	4.34783	0.884652	4.6087	1.64425	4.69565	0.926125	6.26087	2.37826	凹凹凸凸	46	23	23	46	23	23	凹凹凸凸	30	20	凹	11.715	5	凹	11.715	5	凸	11.1951	5	凸	11.1951	5
38	八字胡子	Beard	4.91262	0.929967	4.54369	1.34147	5.69565	1.47376	6.78261	1.31509	4.86	0.728711	4.68	0.998775	5.20833	1.21509	6.58333	1.17646	4.96226	1.09126	4.41509	1.59848	6.22727	1.57153	7	1.44749	八字胡子	103	50	53	46	24	22	八字胡子	28	20	八	368.864	2	字	580.813	6	胡	166.667	9	子	3348.01	3
40	白菜帮子	Stalk of chinese cabbage	4.61364	0.689317	3.95455	1.39692	6.02041	2.07655	7.34694	1.34708	4.63636	0.657952	4.40909	1.22121	5.23077	2.06509	7.34615	1.12933	4.59091	0.73414	3.5	1.43925	6.91304	1.72977	7.34783	1.58426	白菜帮子	44	22	22	49	26	23	白菜帮子	24	28	白	720.164	5	菜	188.924	11	帮	227.157	9	子	3348.01	3
43	白领工人	White-collar worker	5.16304	0.760514	4.44565	1.42294	4.74468	1.72536	7.12766	1.07576	5.04348	0.366589	4.3913	1.19617	4.44	1.55671	6.88	0.971253	5.28261	1.00934	4.5	1.64455	5.09091	1.87487	7.40909	1.14056	白领工人	46	23	23	47	25	22	白领工人	43	21	白	720.164	5	领	976.096	11	工	3526.41	3	人	10357.8	2
49	百废待兴	A lot of things are waiting to be rebuilt	5.51923	1.6309	5.86538	1.43505	4.59184	2.08085	7.18367	1.31772	5.90566	1.58435	5.79245	1.63329	4.375	2.26144	6.95833	1.26763	5.11765	1.59558	5.94118	1.20684	4.8	1.91485	7.4	1.35401	百废待兴	104	53	51	49	24	25	百废待兴	332	29	百	560.83	6	废	97.6699	8	待	326.983	9	兴	483.166	6
50	百废俱兴	Full-scale reconstruction	5.97826	1.48308	6.34783	1.44864	4.86	2.35615	6.92	1.60153	6.18182	1.53177	6.18182	1.76302	4.07407	2.28584	6.81481	1.73287	5.79167	1.444	6.5	1.10335	5.78261	2.13108	7.04348	1.46095	百废俱兴	46	22	24	50	27	23	百废俱兴	73	30	百	560.83	6	废	97.6699	8	俱	33.5099	10	兴	483.166	6
52	百里之遥	Thousands of miles away	4.85714	0.6833	5	1.03594	3.82979	1.68522	6.85106	1.45928	5.15789	0.374634	5.15789	0.374634	4.33333	1.90347	6.41667	1.50121	4.6087	0.782718	4.86957	1.35862	3.30435	1.25896	7.30435	1.29456	百里之遥	42	19	23	47	24	23	百里之遥	43	28	百	560.83	6	里	2015.7	7	之	2500.29	2	遥	25.2733	13
56	百业待兴	A lot of things need to be done, the metaphor is not good, and the economy needs to be developed.	5.60748	1.25711	5.80374	1.60447	4.33333	2.38886	7.05882	1.37712	5.90741	1.23271	5.75926	1.63609	3.74074	2.31371	6.7037	1.5396	5.30189	1.21821	5.84906	1.58595	5	2.34057	7.45833	1.06237	百业待兴	107	54	53	51	27	24	百业待兴	72	26	百	560.83	6	业	1866.64	5	待	326.983	9	兴	483.166	6
57	百依百顺	Obedience	5.45192	1.27622	5.31731	1.35291	5.12245	2.16634	7.34694	0.969343	5.46154	1.22813	5.26923	1.3153	4.83333	2.099	7.125	0.946963	5.44231	1.33451	5.36538	1.40068	5.4	2.23607	7.56	0.960902	百依百顺	104	52	52	49	24	25	百依百顺	393	29	百	560.83	6	依	385.284	8	百	560.83	6	顺	192.321	9
61	拜把兄弟	Worshiping the brothers	5.90385	1.25039	5.79808	1.48376	5.35294	1.9882	7.43137	0.984985	5.71698	1.32109	5.92453	1.28376	4.7037	1.91783	7.18519	1.00142	6.09804	1.15334	5.66667	1.66933	6.08333	1.83958	7.70833	0.907896	拜把兄弟	104	53	51	51	27	24	拜把兄弟	48	28	拜	106.179	9	把	868.978	7	兄	119.727	5	弟	196.76	7
63	半军事化	Semi militarized	5.1165	0.690282	4.90291	1.32483	3.36735	1.4097	6.63265	1.74038	5.33333	0.653197	5.01961	1.04862	3.52	1.19443	6.56	1.52971	4.90385	0.664495	4.78846	1.55092	3.20833	1.61458	6.70833	1.96666	半军事化	103	51	52	49	25	24	半军事化	64	23	半	412.055	5	军	1900.38	6	事	2624.46	8	化	2003.07	4
64	半老徐娘	An elder woman who has past her prime	4.22222	1.2949	5.31111	1.45886	4.44898	1.38536	6.14286	1.87083	4.38095	0.973457	5.14286	0.963624	4.33333	1.20386	6.16667	1.27404	4.08333	1.5299	5.45833	1.7932	4.56	1.55671	6.12	2.3331	半老徐娘	45	21	24	49	24	25	半老徐娘	90	31	半	412.055	5	老	1102.08	6	徐	21.7439	10	娘	159.605	10
65	半梦半醒	Half awaken	4.28889	1.05792	4.88889	1.0274	4.46939	1.54248	6.87755	1.60251	4.21739	1.20441	4.86957	0.868873	4.92	1.55242	6.48	1.71075	4.36364	0.902138	4.90909	1.1916	4	1.41421	7.29167	1.39811	半梦半醒	45	23	22	49	25	24	半梦半醒	55	37	半	412.055	5	梦	126.915	11	半	412.055	5	醒	104.51	16
67	半醒半睡	Half waking and half sleeping	4.34091	0.913546	5.11364	1.26152	4.97917	1.50869	7.14583	1.12967	4.52381	0.749603	4.61905	1.2836	5.25	1.39096	6.70833	0.858673	4.17391	1.02922	5.56522	1.07982	4.70833	1.60106	7.58333	1.21285	半醒半睡	44	21	23	48	24	24	半醒半睡	48	39	半	412.055	5	醒	104.51	16	半	412.055	5	睡	110.611	13
69	包干到户	Dry up to the household	5.79167	1.21967	5.45833	1.35204	4.67347	1.88622	6.26531	2.01841	6.08	1.28841	5.68	1.31403	4.70833	2.13621	6.58333	1.41165	5.47826	1.08165	5.21739	1.38027	4.64	1.65529	5.96	2.45764	包干到户	48	25	23	49	24	25	包干到户	89	20	包	592.684	5	干	755.392	3	到	4030.49	8	户	381.035	4
70	饱经磨难	Hardship	4.33962	1.45986	5.72642	1.34895	4.1875	1.99634	7.25	0.956501	4.71698	1.33557	5.35849	1.14513	4.20833	1.8877	6.95833	0.954585	3.96226	1.49309	6.09434	1.44467	4.16667	2.14003	7.54167	0.883627	饱经磨难	106	53	53	48	24	24	饱经磨难	49	42	饱	47.0539	8	经	3714.01	8	磨	85.8521	16	难	719.944	10
71	宝贝疙瘩	Baby	5.89583	1.53317	5.60417	1.74721	5.56522	1.99613	7.13043	1.22218	6.16667	1.37261	5.91667	1.66594	4.91304	2.02064	7.13043	1.09977	5.625	1.66322	5.29167	1.80529	6.21739	1.78266	7.13043	1.35862	宝贝疙瘩	48	24	24	46	23	23	宝贝疙瘩	64	34	宝	221.11	8	贝	140.934	4	疙	2.52644	8	瘩	2.35293	14
73	保守疗法	Conservative treatment	4.95238	0.538851	4.61905	1.26785	4.16327	1.77185	6.73469	1.71726	5	0.458831	4.95	0.887041	4.16667	2.03591	6.875	1.191	4.90909	0.610159	4.31818	1.49241	4.16	1.51877	6.6	2.12132	保守疗法	42	20	22	49	24	25	保守疗法	58	30	保	1336.89	9	守	239.788	6	疗	103.715	7	法	3154.31	8
74	保险装置	Insurance device	5.19388	0.586061	4.77551	1.23964	5	1.82946	7.04	1.30868	5.125	0.392754	5.125	0.788886	4.36	1.7767	6.76	1.33167	5.26	0.723089	4.44	1.48681	5.64	1.68028	7.32	1.249	保险装置	98	48	50	50	25	25	保险装置	74	43	保	1336.89	9	险	391.019	9	装	700.949	12	置	355.356	13
80	北方领土	Northern territory	5	0.355409	4.55208	1.30481	4.13725	1.84412	7.07843	1.53419	5	0.361158	4.59574	1.09663	3.92593	2.07412	7.03704	1.65207	5	0.353553	4.5102	1.48776	4.375	1.55515	7.125	1.42379	北方领土	96	47	49	51	27	24	北方领土	66	23	北	1945.54	5	方	3269.88	4	领	976.096	11	土	568.512	3
81	备尝艰辛	To taste the hardships	4.22917	1.60106	5.4375	1.80903	4.09434	1.78954	6.9434	1.33611	4.5	1.79371	5.16667	1.85722	4.17857	1.76496	6.57143	1.42539	3.95833	1.36666	5.70833	1.75646	4	1.84842	7.36	1.11355	备尝艰辛	48	24	24	53	28	25	备尝艰辛	50	32	备	656.875	8	尝	58.7192	9	艰	53.9766	8	辛	28.7993	7
82	备而不用	Ready just in case	4.65217	1.35347	4.97826	1.06435	5.90196	1.5265	7.01961	1.19147	4.73913	1.54383	5.08696	0.99604	5.55556	1.39596	6.88889	1.08604	4.56522	1.16096	4.86957	1.14035	6.29167	1.60106	7.16667	1.30773	备而不用	46	23	23	51	27	24	备而不用	40	23	备	656.875	8	而	2283.95	6	不	9822.27	4	用	3246.04	5
85	奔腾咆哮	Raging roaring	5.33333	1.65457	6.875	1.36249	4.12	2.14419	6.6	1.85164	5.625	1.66322	6.54167	1.50302	3.64	2.25241	6.44	2.06317	5.04167	1.62799	7.20833	1.14129	4.6	1.95789	6.76	1.64012	奔腾咆哮	48	24	24	50	25	25	奔腾咆哮	57	39	奔	92.0141	8	腾	67.1784	13	咆	1.46565	8	哮	3.54505	10
87	本本分分	Not go beyond moral bounds	5.82979	0.916495	4.53191	1.70487	6.375	1.45317	7.60417	1.0667	5.95833	0.954585	4.875	1.77697	6.13043	1.6598	7.3913	1.03305	5.69565	0.87567	4.17391	1.58551	6.6	1.22474	7.8	1.08012	本本分分	47	24	23	48	23	25	本本分分	39	18	本	2895.78	5	本	2895.78	5	分	3077.2	4	分	3077.2	4
88	本小利微	The small profits	4.82609	1.06049	5.1087	1.12008	5.18367	1.4094	6.85714	1.25831	5.34783	0.934622	5.3913	1.03305	5.33333	1.37261	6.75	0.989071	4.30435	0.926125	4.82609	1.15413	5.04	1.45717	6.96	1.48549	本小利微	46	23	23	49	24	25	本小利微	31	28	本	2895.78	5	小	2135.97	3	利	1925.1	7	微	300.879	13
89	笨鸟先飞	The slow need to start early	5.59574	1.40897	5.6383	1.45102	6.17021	1.64606	7.46809	0.855953	5.52174	1.47308	5.78261	1.44463	5.65217	1.87347	7.04348	0.705708	5.66667	1.37261	5.5	1.47442	6.66667	1.23945	7.875	0.797414	笨鸟先飞	47	23	24	47	23	24	笨鸟先飞	60	25	笨	14.4115	11	鸟	65.7916	5	先	1153.1	6	飞	407.777	3
92	比肩而立	Stand shoulder to shoulder	5.33333	0.852803	4.8	1.53149	5.52083	1.2546	6.33333	1.62864	5.33333	0.57735	5.14286	0.573212	5.34783	1.11227	6.34783	1.26522	5.33333	1.0495	4.5	2	5.68	1.37598	6.32	1.93046	比肩而立	45	21	24	48	23	25	比肩而立	80	23	比	1091.32	4	肩	59.5902	8	而	2283.95	6	立	1499.57	5
97	闭口无言	Remain silent	4.12222	1.13396	4.61111	1.2008	5.7551	1.66497	7	1.27475	4.08696	1.31125	4.47826	1.20112	5.92	1.6052	7.04	1.20692	4.15909	0.943478	4.75	1.21253	5.58333	1.74248	6.95833	1.36666	闭口无言	45	23	22	49	25	24	闭口无言	48	20	闭	108.234	6	口	1079.29	3	无	1828.92	4	言	674.584	7
98	闭门思过	To shut one’s door and reflect on one’s misdeeds	4.40816	1.25695	4.85714	1.5	5.21277	2.05295	7.19149	1.035	4.84	1.1431	4.92	1.03763	5.625	1.76469	7.125	0.899879	3.95833	1.23285	4.79167	1.8877	4.78261	2.27549	7.26087	1.17618	闭门思过	49	25	24	47	24	23	闭门思过	92	24	闭	108.234	6	门	1206.79	3	思	1002.68	9	过	2727.03	6
102	避难就易	Avoid difficulties to do easy tasks	4.60417	1.4694	5.27083	1.23322	5.55102	1.9797	6.95918	1.44279	4.44	1.60935	5.2	1.38444	5.72	1.56844	6.4	1.63299	4.78261	1.31275	5.34783	1.07063	5.375	2.35561	7.54167	0.931533	避难就易	48	25	23	49	25	24	避难就易	35	46	避	156.248	16	难	719.944	10	就	2333.69	12	易	574.346	8
103	边边角角	Corner	4.81188	0.703034	4.79208	1.2595	5.31373	1.65518	6.96078	1.44168	5.02041	0.381324	4.95918	0.815454	5.19231	1.78928	7.15385	0.92487	4.61538	0.866678	4.63462	1.55965	5.44	1.52971	6.76	1.83212	边边角角	101	49	52	51	26	25	边边角角	74	24	边	577.86	5	边	577.86	5	角	305.106	7	角	305.106	7
105	标题音乐	Program music	5.22222	0.703526	4.31111	1.71653	4.9	1.44632	5.86	2.0703	5.04762	0.218218	4.42857	1.39898	4.38462	1.20256	5.69231	1.64364	5.375	0.923721	4.20833	1.97768	5.45833	1.50302	6.04167	2.47561	标题音乐	45	21	24	50	26	24	标题音乐	94	38	标	728.039	9	题	1252.36	15	音	533.815	9	乐	675.803	5
106	标准答案	Standard answer	5.37778	1.15383	5.17778	1.78744	3.86957	2.26675	7.86957	1.02434	5.13636	1.12527	5.31818	1.17053	3.59091	1.96781	7.27273	1.03196	5.6087	1.15755	5.04348	2.24577	4.125	2.52488	8.41667	0.653863	标准答案	45	22	23	46	22	24	标准答案	179	41	标	728.039	9	准	656.674	10	答	284.035	12	案	503.546	10
111	冰消瓦解	Dissolve	5.47826	1.32898	5.45652	1.48633	5.04255	1.86451	6.48936	1.62684	5.36364	1.39882	5.63636	1.29267	4.3913	1.85225	6	1.5667	5.58333	1.28255	5.29167	1.65448	5.66667	1.6854	6.95833	1.57367	冰消瓦解	46	22	24	47	23	24	冰消瓦解	39	33	冰	130.84	6	消	793.819	10	瓦	133.344	4	解	1248.17	13
114	兵团战士	Legion of soldiers	5.39216	0.691631	5.31373	1.14304	3.81633	1.71602	6.81633	1.45306	5.2549	0.594748	5.33333	0.791623	4	1.69398	7	1.35133	5.52941	0.757706	5.29412	1.41837	3.64	1.75309	6.64	1.55134	兵团战士	102	51	51	49	24	25	兵团战士	50	25	兵	551.831	7	团	797.651	6	战	1502.44	9	士	368.569	3
119	波峰浪谷	Wave's peak and valleys	5.78723	1.24998	6.06383	1.24069	4	1.56347	6.32609	1.5924	5.84	1.34412	6	1.32288	3.86957	1.5755	6.30435	1.01957	5.72727	1.16217	6.13636	1.16682	4.13043	1.5755	6.34783	2.03623	波峰浪谷	47	25	22	46	23	23	波峰浪谷	58	35	波	347.556	8	峰	95.9205	10	浪	128.776	10	谷	41.4431	7
120	波浪滔天	Wave on the sky	4.95833	1.52927	6.08333	1.36574	3.31915	1.32051	7.17021	0.985088	5.08	1.68127	5.88	1.1299	3.27273	1.42032	7.18182	0.732664	4.82609	1.37021	6.30435	1.57926	3.36	1.25433	7.16	1.17898	波浪滔天	48	25	23	47	22	25	波浪滔天	31	35	波	347.556	8	浪	128.776	10	滔	9.43759	13	天	2247.5	4
121	波平如镜	Wave flat mirror	5.83333	1.09803	4.08333	2.06112	4.39583	1.5944	6.66667	1.65457	6.125	1.2959	5	1.74456	3.70833	1.42887	6.625	1.20911	5.54167	0.779028	3.16667	1.9708	5.08333	1.47196	6.70833	2.0319	波平如镜	48	24	24	48	24	24	波平如镜	38	35	波	347.556	8	平	1603.12	5	如	1955.83	6	镜	85.3343	16
122	波涛汹涌	Roaring waves	5.12766	1.88376	6.7234	1.40963	3.12766	1.68906	7.34043	1.18462	5.13043	2.22188	6.78261	1.34693	3.33333	1.94862	7.125	1.07592	5.125	1.5411	6.66667	1.49395	2.91304	1.37883	7.56522	1.27301	波涛汹涌	47	23	24	47	24	23	波涛汹涌	590	35	波	347.556	8	涛	12.8955	10	汹	7.55552	7	涌	48.7046	10
123	伯仲之间	Almost on a par; equally matched	5.43478	1.12846	4.8913	1.46406	4.94	1.55721	6.96	1.62832	5.30435	0.76484	5.04348	0.824525	4.6	1.70783	6.4	1.82574	5.56522	1.40861	4.73913	1.9121	5.28	1.33915	7.52	1.19443	伯仲之间	46	23	23	50	25	25	伯仲之间	88	22	伯	182.029	7	仲	26.4355	6	之	2500.29	2	间	1602.34	7
128	不打自招	Confess everything without having received a single blow of the bamboo	4.31915	1.16295	5.51064	1.33306	5.12	2.0468	7.16	1.33034	4.45833	1.21509	5.29167	1.33447	4.84615	1.80427	6.73077	1.4299	4.17391	1.11405	5.73913	1.32175	5.41667	2.28257	7.625	1.05552	不打自招	47	24	23	50	26	24	不打自招	106	23	不	9822.27	4	打	847.707	5	自	3316.74	6	招	207.341	8
134	不慌不乱	Without confusion	5.86957	1.04581	4.41304	1.796	6.6875	1.20559	7.60417	0.916505	5.77273	0.972567	4.95455	1.61768	6.625	0.969648	7.33333	0.963087	5.95833	1.12208	3.91667	1.83958	6.75	1.42188	7.875	0.797414	不慌不乱	46	22	24	48	24	24	不慌不乱	23	27	不	9822.27	4	慌	40.5326	12	不	9822.27	4	乱	203.363	7
138	不可言状	Indescribable	4.62376	1.02812	5.39604	1.09617	4.94	1.87801	6.76	1.39328	4.45283	1.11917	5.30189	0.972406	4.8	1.77951	6.64	1.55134	4.8125	0.891001	5.5	1.22039	5.08	1.99833	6.88	1.23558	不可言状	101	53	48	50	25	25	不可言状	94	23	不	9822.27	4	可	3245.08	5	言	674.584	7	状	175.708	7
140	不露锋芒	Hide one's candle under a bushel	5.57447	1.21126	4.55319	1.76695	5.83673	1.67515	7.38776	0.953422	5.625	1.43898	4.95833	1.70623	5.6	1.63299	7.08	0.909212	5.52174	0.947224	4.13043	1.76595	6.08333	1.71735	7.70833	0.907896	不露锋芒	47	24	23	49	25	24	不露锋芒	31	43	不	9822.27	4	露	213.384	21	锋	35.9452	12	芒	8.02637	6
142	不念旧恶	Forgive the past hatred	5.47525	0.995932	5.27723	1.18422	5.79592	1.85943	6.73469	1.81172	5.6	0.857143	5.3	1.34392	6.04	1.94679	7.08	1.03763	5.35294	1.11038	5.2549	1.01672	5.54167	1.76879	6.375	2.33708	不念旧恶	101	50	51	49	25	24	不念旧恶	73	27	不	9822.27	4	念	431.946	8	旧	200.293	5	恶	188.285	10
145	不善言谈	Not talkative	4.63462	0.763966	4.80769	1.15814	5.0625	1.56295	7.375	0.81541	4.78431	0.576671	4.7451	0.913086	5.20833	1.53167	7.08333	0.653863	4.49057	0.890606	4.86792	1.35927	4.91667	1.6129	7.66667	0.868115	不善言谈	104	51	53	48	24	24	不善言谈	106	33	不	9822.27	4	善	318.773	12	言	674.584	7	谈	527.48	10
146	不施脂粉	Do not apply fat	5.97872	1.45198	4.57447	1.47065	6.16667	1.71766	7	1.39909	5.875	1.2619	4.54167	1.5598	5.83333	1.6594	6.79167	0.977093	6.08696	1.64905	4.6087	1.4058	6.5	1.74456	7.20833	1.71893	不施脂粉	47	24	23	48	24	24	不施脂粉	54	33	不	9822.27	4	施	549.517	9	脂	26.7396	10	粉	111.631	10
149	不咸不淡	Not salty not pale	5.02128	0.82064	4.87234	1.36122	5.81633	1.31772	7.32653	0.987162	5.13043	0.919701	5.30435	0.97397	5.84	1.43411	7.04	0.934523	4.91667	0.717282	4.45833	1.5598	5.79167	1.21509	7.625	0.969648	不咸不淡	47	23	24	49	25	24	不咸不淡	44	28	不	9822.27	4	咸	22.3154	9	不	9822.27	4	淡	94.8944	11
152	不用客气	You are welcome	5.70192	0.868877	4.68269	1.38833	6.04082	1.29034	7.65306	0.969343	5.46	0.64555	4.96	1.02936	5.91667	1.1389	7.20833	1.02062	5.92593	0.987695	4.42593	1.62064	6.16	1.43411	8.08	0.702377	不用客气	104	50	54	49	24	25	不用客气	105	22	不	9822.27	4	用	3246.04	5	客	488.493	9	气	1139.89	4
157	不知情者	Unwitting person	4.84444	0.73718	4.35556	1.52488	4.71429	1.85966	6.81633	1.46733	5	0	4.80952	1.03049	4.66667	1.16718	6.33333	1.37261	4.70833	0.999094	3.95833	1.78104	4.76	2.36784	7.28	1.42945	不知情者	45	21	24	49	24	25	不知情者	23	31	不	9822.27	4	知	1298.23	8	情	1729.84	11	者	2335.76	8
158	不足轻重	Worthless	4.53061	0.851973	5.16327	0.927183	4.89583	1.32472	6.79167	1.38316	4.6875	0.719227	5.16667	0.753244	5.08696	1.27611	6.78261	0.735868	4.38	0.945235	5.16	1.0759	4.72	1.36991	6.8	1.80278	不足轻重	98	48	50	48	23	25	不足轻重	40	29	不	9822.27	4	足	543.77	7	轻	439.1	9	重	1984.12	9
159	不足为据	Cannot be taken as a proof or a basis for belief	4.375	1.12278	5.10417	1.56068	5.04082	1.59373	6.67347	1.34455	4.58333	0.974308	5.33333	0.963087	4.88	1.64114	6.4	1.44338	4.16667	1.23945	4.875	1.985	5.20833	1.5598	6.95833	1.19707	不足为据	48	24	24	49	25	24	不足为据	57	26	不	9822.27	4	足	543.77	7	为	5620.72	4	据	811.425	11
160	不足为凭	Cannot be taken as evidence	4.28261	1.08859	5.52174	1.11034	4.83333	1.35793	6.75	1.21165	4.43478	0.992063	5.47826	1.08165	4.6087	1.2699	6.56522	1.03687	4.13043	1.17954	5.56522	1.16096	5.04	1.42829	6.92	1.35154	不足为凭	46	23	23	48	23	25	不足为凭	81	23	不	9822.27	4	足	543.77	7	为	5620.72	4	凭	70.3308	8
165	参差错落	All kinds of things are intertwined.	4.61702	1.3602	4.87234	1.48349	4.91489	1.17639	6.31915	1.65643	4.44	1.52971	5.2	1.32288	4.82609	0.777652	5.3913	1.52968	4.81818	1.13961	4.5	1.59613	5	1.47442	7.20833	1.25036	参差错落	47	25	22	47	23	24	参差错落	74	42	参	727.667	8	差	282.423	9	错	245.437	13	落	422.942	12
166	参考消息	Reference news	5.16667	0.377195	4.40476	1.54698	4.45833	1.63679	7.14583	1.27145	5.19048	0.402374	5.19048	0.402374	4.45833	1.41357	6.91667	1.17646	5.14286	0.358569	3.61905	1.85678	4.45833	1.86452	7.375	1.34528	参考消息	42	21	21	48	24	24	参考消息	560	34	参	727.667	8	考	527.554	6	消	793.819	10	息	562.906	10
167	参众两院	Senate and house	5	0.377964	4.27907	1.53259	3.68	1.87834	5.86	2.29471	5	0	5.05	0.223607	3.24	1.73877	5.64	2.32522	5	0.522233	3.6087	1.85225	4.12	1.94336	6.08	2.28983	参众两院	43	20	23	50	25	25	参众两院	493	30	参	727.667	8	众	663.778	6	两	1025.77	7	院	1033.27	9
171	苍苍茫茫	The vast expanse of the sky	4.95455	0.913835	4.65909	1.34585	4.19149	1.51282	6.53191	1.62656	4.95	0.394034	4.95	0.394034	4.125	1.42379	6.375	1.20911	4.95833	1.19707	4.41667	1.76725	4.26087	1.62976	6.69565	1.98711	苍苍茫茫	44	20	24	47	24	23	苍苍茫茫	44	32	苍	21.8446	7	苍	21.8446	7	茫	15.8833	9	茫	15.8833	9
173	草船借箭	Borrow arrows with thatched boats	5.87234	1.43886	5.21277	2.02094	5.1	2.10199	7.12	1.47966	5.625	1.63687	4.91667	2.06243	4.80769	1.95998	6.61538	1.44435	6.13043	1.17954	5.52174	1.97414	5.41667	2.24416	7.66667	1.34056	草船借箭	47	24	23	50	26	24	草船借箭	98	45	草	267.558	9	船	230.498	11	借	171.773	10	箭	49.6416	15
174	草木皆兵	Every bush and tree look like an enemy	4.19811	1.27556	5.64151	1.18071	3.8	1.90595	6.92	1.22624	4.13208	1.07485	5.5283	1.08493	3.84	1.81842	6.68	1.46401	4.26415	1.45643	5.75472	1.26955	3.76	2.02649	7.16	0.898146	草木皆兵	106	53	53	50	25	25	草木皆兵	222	29	草	267.558	9	木	274.901	4	皆	55.939	9	兵	551.831	7
176	侧耳细听	Fine hearing of the lateral ear	5.83333	1.07848	4.59375	1.57323	6.3	1.43214	7.5	0.974156	5.64	0.7	4.68	1.51987	6.24	1.42244	7.24	0.969536	6.04348	1.36443	4.5	1.65831	6.36	1.46856	7.76	0.925563	侧耳细听	48	25	23	50	25	25	侧耳细听	128	29	侧	110.672	8	耳	161.511	6	细	404.615	8	听	477.837	7
177	侧目而视	Cast a side glance at	4.32609	1.2833	5.17391	1.27025	5.375	1.81747	7.27083	1.10588	4.63636	0.726731	5.27273	0.882735	5.91667	1.50121	7.08333	0.880547	4.04167	1.60106	5.08333	1.55806	4.83333	1.9708	7.45833	1.28466	侧目而视	46	22	24	48	24	24	侧目而视	102	27	侧	110.672	8	目	1386.17	5	而	2283.95	6	视	842.207	8
178	测字先生	Fortune-teller	5.025	0.422902	4.625	1.37165	4.3125	1.1328	5.83333	2.00354	5.05556	0.235702	5.05556	0.416176	4.13043	1.32474	6.13043	1.7915	5	0.534522	4.27273	1.7507	4.48	0.918332	5.56	2.18098	测字先生	40	18	22	48	23	25	测字先生	50	26	测	304.912	9	字	580.813	6	先	1153.1	6	生	4823.71	5
179	插翅难飞	No possible escape	4.06383	1.62058	5.78723	1.41323	3	1.69706	7.21569	1.30098	4	1.89297	5.56	1.66032	3.53846	1.81617	7.07692	0.89098	4.13636	1.28343	6.04545	1.0455	2.44	1.38684	7.36	1.62993	插翅难飞	47	25	22	51	26	25	插翅难飞	56	35	插	64.9057	12	翅	22.3651	10	难	719.944	10	飞	407.777	3
180	茶楼酒肆	Teahouses and wineshops	5.02083	1.43645	5.02083	1.66937	4.58333	1.51353	6.33333	1.76651	4.83333	1.40393	5.5	1.14208	4.16	1.49108	6.12	1.71561	5.20833	1.47381	4.54167	1.97768	5.04348	1.4295	6.56522	1.82971	茶楼酒肆	48	24	24	48	25	23	茶楼酒肆	33	45	茶	154.365	9	楼	232.161	13	酒	253.867	10	肆	22.6706	13
181	茶余酒后	At one's leisure	5.66667	1.07848	4.48958	1.66787	5.33333	1.61553	7.25	1.13924	5.64	0.860233	5.12	1.58955	4.92	1.57903	7.04	1.09848	5.69565	1.29456	3.80435	1.49802	5.78261	1.56544	7.47826	1.16266	茶余酒后	48	25	23	48	25	23	茶余酒后	61	32	茶	154.365	9	余	326.57	7	酒	253.867	10	后	2743.81	6
183	差之毫厘	The least bit of difference	4.23913	1.31968	5.63043	1.16158	4.48	1.84324	6.82	1.52114	4.64	1.49666	5.48	1.26227	4.8	1.89297	6.6	1.70783	3.7619	0.889087	5.80952	1.03049	4.16	1.772	7.04	1.30639	差之毫厘	46	25	21	50	25	25	差之毫厘	65	31	差	282.423	9	之	2500.29	2	毫	194.653	11	厘	44.5975	9
184	柴米油盐	Fuel	5.07778	0.543093	4.07778	1.50739	5.42857	2.30036	7.79592	1.07973	5.25	0.607919	4.58333	1.31601	4.8	2.12132	7.64	1.15036	4.88095	0.384212	3.5	1.53297	6.08333	2.33902	7.95833	0.999094	柴米油盐	45	24	21	49	25	24	柴米油盐	447	34	柴	35.7513	10	米	416.617	6	油	329.102	8	盐	74.1569	10
186	产科医院	Maternity hospital	5.03158	0.424079	4.67368	1.54673	4.14286	1.88193	7.22449	1.40335	4.97778	0.149071	4.91111	0.468179	3.70833	1.89918	7.08333	1.21285	5.08	0.565685	4.46	2.07227	4.56	1.80462	7.36	1.57797	产科医院	95	45	50	49	24	25	产科医院	63	31	产	3213.45	6	科	1642.42	9	医	503.421	7	院	1033.27	9
187	产销合同	Manufacturing and marketing contracts	5.08889	0.514438	4.16667	1.65831	4.375	1.9529	6.41667	1.79637	5.17391	0.716822	4.78261	1.47576	3.8	1.70783	6.6	1.35401	5	0	3.52273	1.62185	5	2.04495	6.21739	2.19414	产销合同	45	23	22	48	25	23	产销合同	83	30	产	3213.45	6	销	404.836	12	合	2129.25	6	同	2786.12	6
188	常规能源	Conventional energy	5.13	0.418149	4.59	1.44317	4.42553	1.88524	7.10638	1.35509	5.16667	0.476393	4.85417	1.12967	3.88	1.9	6.68	1.40594	5.09615	0.35753	4.34615	1.65547	5.04545	1.7037	7.59091	1.14056	常规能源	100	48	52	47	25	22	常规能源	64	42	常	1253.32	11	规	558.594	8	能	2883.75	10	源	446.359	13
189	常规战争	Conventional war	4.16327	1.41932	5.53061	1.73328	3.125	1.75796	6.6875	1.86976	4.28	1.64621	5.52	1.50333	2.95652	1.8703	6.65217	1.5553	4.04167	1.16018	5.54167	1.97768	3.28	1.67133	6.72	2.15097	常规战争	49	25	24	48	23	25	常规战争	104	34	常	1253.32	11	规	558.594	8	战	1502.44	9	争	891.82	6
190	敞开思想	Get things off one's chest	6	1.07497	5.3913	1.66638	6.41667	1.45622	7.3125	1.055	6	1.06904	4.90909	1.65929	5.70833	1.70623	7.29167	1.0417	6	1.10335	5.83333	1.57885	7.125	0.612372	7.33333	1.09014	敞开思想	46	22	24	48	24	24	敞开思想	43	38	敞	18.0022	12	开	2553.84	4	思	1002.68	9	想	1405.79	13
191	唱独角戏	Solo	4.19231	1.20448	5.28365	1.27833	5.6383	1.86996	7	1.26834	4.47059	1.12317	5.2451	0.927429	5.33333	1.78561	6.70833	1.19707	3.92453	1.22434	5.32075	1.54641	5.95652	1.94184	7.30435	1.29456	唱独角戏	208	102	106	47	24	23	唱独角戏	54	33	唱	158.241	11	独	390.408	9	角	305.106	7	戏	234.451	6
192	抄抄写写	Copy and write	4.70707	0.73196	4.82828	1.10694	6.25	1.87367	7.625	1.00266	4.95918	0.538485	4.71429	1.08012	6.13043	1.93777	7.3913	1.03305	4.46	0.813408	4.94	1.13227	6.36	1.84572	7.84	0.943398	抄抄写写	99	49	50	48	23	25	抄抄写写	54	24	抄	32.6873	7	抄	32.6873	7	写	523.69	5	写	523.69	5
193	超级商场	Super market	5.76238	0.98131	5.43564	1.22814	5.10638	2.11859	7.3617	1.22342	5.44	0.760236	5.14	1.06924	4.43478	1.61881	7.08696	1.27611	6.07843	1.07412	5.72549	1.31268	5.75	2.36367	7.625	1.13492	超级商场	101	50	51	47	23	24	超级商场	83	35	超	320.971	12	级	1035.59	6	商	1163.68	11	场	1805.19	6
194	朝朝暮暮	Day and night	5.41304	1.25744	5.19565	1.73358	5.02128	1.42172	6.97872	1.3908	5	1.04447	4.91304	1.41142	5.21739	1.47576	6.73913	1.21421	5.82609	1.33662	5.47826	1.99703	4.83333	1.37261	7.20833	1.53167	朝朝暮暮	46	23	23	47	23	24	朝朝暮暮	214	52	朝	333.499	12	朝	333.499	12	暮	5.41284	14	暮	5.41284	14
195	朝发夕至	Start at dawn and arrive at dusk	5.68182	1.00632	5.04545	1.61324	4.96	1.77235	6.76	1.79068	5.66667	0.795822	5.47619	1.07792	4.56	1.82757	6.76	1.78606	5.69565	1.18455	4.65217	1.92138	5.36	1.65529	6.76	1.83212	朝发夕至	44	21	23	50	25	25	朝发夕至	68	26	朝	333.499	12	发	4277.54	5	夕	20.3823	3	至	846.806	6
202	成千成百	Hundreds or thousands of	5.26596	0.765074	4.88298	1.44167	4.54348	1.40959	6.95652	1.38173	5.25	0.675664	5.125	0.850192	4.70833	1.48848	6.45833	1.61458	5.28261	0.86374	4.63043	1.85997	4.36364	1.329	7.5	0.801784	成千成百	47	24	23	46	24	22	成千成百	48	21	成	3751.08	6	千	319.798	3	成	3751.08	6	百	560.83	6
203	成千累万	Thousands upon thousands	4.91304	1.00722	5.19565	1.60027	4.7551	1.57494	6.65306	1.40758	5.17391	1.07247	5.26087	1.38883	4.6	1.60728	6.44	1.44568	4.65217	0.884652	5.13043	1.8167	4.91667	1.55806	6.875	1.36135	成千累万	46	23	23	49	25	24	成千累万	61	23	成	3751.08	6	千	319.798	3	累	115.726	11	万	781.635	3
205	成渝铁路	Chengdu-chongqing railway	5.07143	0.260661	4.5	1.32977	4.35417	1.81588	6.29167	1.98889	5	0	5	0.57735	3.75	1.70038	6.625	1.46888	5.13043	0.34435	4.08696	1.62125	4.95833	1.75646	5.95833	2.38618	成渝铁路	42	19	23	48	24	24	成渝铁路	72	41	成	3751.08	6	渝	7.29083	12	铁	327.13	10	路	1036.73	13
209	城乡交流	Urban and rural communication	5.55769	0.798383	4.86538	1.32238	4.63265	1.78762	6.63265	1.6033	5.41176	0.638012	5.07843	0.934733	4.54167	1.74404	6.58333	1.28255	5.69811	0.911147	4.66038	1.59257	4.72	1.86011	6.68	1.8868	城乡交流	104	51	53	49	24	25	城乡交流	102	28	城	846.391	9	乡	328.567	3	交	1106.25	6	流	948.45	10
215	吃商品粮	Eat commodity grain	4.91304	0.724985	4.80435	1.73358	4.36	2.12622	6.72	1.94873	5.09091	0.294245	4.86364	1.28343	3.64	1.8	7.08	1.15181	4.75	0.944089	4.75	2.09035	5.08	2.21585	6.36	2.48126	吃商品粮	46	22	24	50	25	25	吃商品粮	35	39	吃	273.555	6	商	1163.68	11	品	1689.38	9	粮	145.187	13
216	吃香喝辣	Feasting oneself	5.77143	1.63647	5.8	1.20416	5.92	1.93612	7.36	1.04511	5.28846	1.40498	5.32692	1.04264	5.36	2.07926	7.28	1.17331	6.24528	1.71986	6.26415	1.17916	6.48	1.63605	7.44	0.916515	吃香喝辣	105	52	53	50	25	25	吃香喝辣	25	41	吃	273.555	6	香	347.807	9	喝	91.9182	12	辣	24.0056	14
221	抽刀断水	Draw a knife to cut off the running water.	4.53191	1.63987	5.78723	1.55949	4.16667	1.76651	6.14583	1.57087	3.91304	1.53484	5.65217	1.43364	4.29167	1.70623	5.75	1.48177	5.125	1.5411	5.91667	1.69184	4.04167	1.85283	6.54167	1.58743	抽刀断水	47	23	24	48	24	24	抽刀断水	42	25	抽	115.493	8	刀	99.3886	2	断	527.891	11	水	1535.76	4
230	出生入死	Go through fire and water	5.42553	1.89673	6.46809	1.44239	5.14583	2.18301	7.35417	1.36038	5.20833	2.10546	6.66667	1.23945	5.34783	2.16603	7.04348	1.63702	5.65217	1.66812	6.26087	1.62976	4.96	2.22636	7.64	0.994987	出生入死	47	24	23	48	23	25	出生入死	590	18	出	4757.26	5	生	4823.71	5	入	1407.48	2	死	481.523	6
231	初级小学	Primary school	5.02439	0.272746	4.4878	1.48529	4.68	1.92131	7.52	1.34377	5	0	5.10526	0.458831	4.15385	1.7133	7.30769	1.22537	5.04545	0.37509	3.95455	1.83815	5.25	2.00543	7.75	1.45213	初级小学	41	19	22	50	26	24	初级小学	81	24	初	400.347	7	级	1035.59	6	小	2135.97	3	学	4035.57	8
232	楚汉相争	Competition between chu and han; chu-han contention	4.77083	1.25883	5.79167	1.83301	3.625	1.64543	6.58333	1.63516	4.58333	1.1389	5.41667	1.55806	3.56522	1.77933	6.3913	1.61637	4.95833	1.36666	6.16667	2.03591	3.68	1.54704	6.76	1.66533	楚汉相争	48	24	24	48	23	25	楚汉相争	96	33	楚	151.514	13	汉	311.462	5	相	1565.14	9	争	891.82	6
233	楚河汉界	The han boundary of the chu river	5	0.690066	4.83721	1.19384	4.39216	1.77852	6.76471	1.65636	5.04762	0.384212	4.90476	0.300793	4.11111	1.88788	6.40741	1.62337	4.95455	0.898532	4.77273	1.65994	4.70833	1.62799	7.16667	1.63299	楚河汉界	43	21	22	51	27	24	楚河汉界	71	35	楚	151.514	13	河	486.392	8	汉	311.462	5	界	1084.58	9
235	触手可及	In touch with the hands	5.90566	1.02844	5.35849	1.55035	6.68085	1.32051	7.44681	1.0593	5.81132	0.941697	5.13208	1.45494	6	1.2792	7.04348	1.06508	6	1.1094	5.58491	1.62237	7.33333	1.00722	7.83333	0.916831	触手可及	106	53	53	47	23	24	触手可及	80	25	触	116.019	13	手	1414.05	4	可	3245.08	5	及	1116.87	3
237	传呼电话	Paging telephone	5.06667	0.53936	4.48889	1.40813	5.08163	2.04976	6.77551	1.55811	5.09524	0.70034	4.90476	1.22085	4.375	1.9068	6.83333	1.09014	5.04167	0.358641	4.125	1.48361	5.76	1.98494	6.72	1.92614	传呼电话	45	21	24	49	24	25	传呼电话	34	27	传	864.783	6	呼	243.298	8	电	2197.76	5	话	1185.64	8
240	传真电报	Facsimile telegram	4.95652	0.294884	4.28261	1.50056	4.98	1.69621	6.54	1.65628	5	0.294884	5.04167	0.358641	4.2	1.52753	6.76	1.26754	4.90909	0.294245	3.45455	1.81861	5.76	1.50776	6.32	1.97315	传真电报	46	24	22	50	25	25	传真电报	69	28	传	864.783	6	真	869.064	10	电	2197.76	5	报	2394.79	7
241	传真电话	Fax phone	5	0.220863	4.28571	1.53473	5.36735	2.26103	6.97959	1.73793	5	0	5.05263	0.229416	3.95833	1.96666	7.375	0.969648	5	0.301511	3.65217	1.84905	6.72	1.6207	6.6	2.19848	传真电话	42	19	23	49	24	25	传真电话	57	29	传	864.783	6	真	869.064	10	电	2197.76	5	话	1185.64	8
242	传宗接代	Have a son to carry on his family name	5.8913	1.40203	5.84783	1.63255	4.35417	2.10864	7.41667	1.18202	6.17391	1.11405	6.04348	1.22394	4.45833	2.37705	7.25	1.25974	5.6087	1.61637	5.65217	1.96813	4.25	1.84744	7.58333	1.10007	传宗接代	46	23	23	48	24	24	传宗接代	306	30	传	864.783	6	宗	235.534	8	接	999.812	11	代	2017.15	5
243	闯荡江湖	Make a living away from home	5.95327	1.15238	6.09346	1.29245	5.24	2.046	7	1.57791	5.57407	1.12605	5.51852	1.02314	5.12	2.02731	6.52	1.8735	6.33962	1.05509	6.67925	1.28263	5.36	2.09921	7.48	1.04563	闯荡江湖	107	54	53	50	25	25	闯荡江湖	93	33	闯	24.3948	6	荡	84.5185	9	江	603.051	6	湖	219.583	12
247	垂手可得	Acquire a thing easily	5.89815	1.26742	5.74074	1.34213	6.34694	1.89902	7.12245	1.39393	5.74074	1.2004	5.53704	1.43689	5.84	1.40475	6.84	1.10604	6.05556	1.32347	5.94444	1.2196	6.875	2.21286	7.41667	1.6129	垂手可得	108	54	54	49	25	24	垂手可得	79	28	垂	62.7909	8	手	1414.05	4	可	3245.08	5	得	2822.14	11
250	春去秋来	Time rolls on	5.31915	1.32051	4.70213	1.50239	2.96	1.5513	7.64	1.20814	5.43478	1.19947	5.26087	1.32175	3.04	1.79072	7.68	0.988264	5.20833	1.444	4.16667	1.49395	2.88	1.30128	7.6	1.41421	春去秋来	47	23	24	50	25	25	春去秋来	88	30	春	316.163	9	去	1621.28	5	秋	142.529	9	来	4682.8	7
252	春夏秋冬	Spring, summer, autumn and winter	5.44444	0.966614	4.42222	1.38972	3.42308	2.1543	8	0.949716	5.09524	0.300793	4.95238	0.973457	3.48148	2.17274	7.81481	1.00142	5.75	1.22474	3.95833	1.5458	3.36	2.17715	8.2	0.866025	春夏秋冬	45	21	24	52	27	25	春夏秋冬	795	33	春	316.163	9	夏	160.525	10	秋	142.529	9	冬	103.113	5
253	唇红齿白	Rosy lips and pretty white teeth	5.83333	1.37351	5.25	1.45134	4.97959	1.31482	6.65306	1.43688	5.25	1.03209	5.41667	1.01795	4.54167	1.06237	6.33333	1.20386	6.41667	1.44212	5.08333	1.79169	5.4	1.41421	6.96	1.59374	唇红齿白	48	24	24	49	24	25	唇红齿白	62	29	唇	30.6575	10	红	461.971	6	齿	43.2918	8	白	720.164	5
254	唇枪舌剑	Battle of words	4.08511	1.69179	6.48936	1.26615	5.16327	2.03457	7.30612	1.1031	4.3913	1.82755	6.26087	1.57299	5	2.06419	7.125	0.991814	3.79167	1.53167	6.70833	0.858673	5.32	2.03552	7.48	1.19443	唇枪舌剑	47	23	24	49	24	25	唇枪舌剑	381	33	唇	30.6575	10	枪	137.611	8	舌	13.6236	6	剑	67.2818	9
256	此生此世	This life in this world	5.35644	0.819563	5.09901	1.25304	4.38776	1.97712	7.14286	1.30703	5.12	0.435187	5	0.670059	4.375	1.78916	7.08333	0.829702	5.58824	1.02326	5.19608	1.63731	4.4	2.17945	7.2	1.65831	此生此世	101	50	51	49	24	25	此生此世	37	22	此	1536.3	6	生	4823.71	5	此	1536.3	6	世	1564.19	5
257	匆匆过客	Passer	4.54369	0.751165	4.83495	1.10344	4.6875	1.24039	6.89583	1.47662	4.5	0.70014	5	0.816497	4.8	1.38444	6.44	1.52971	4.58824	0.8044	4.66667	1.32162	4.56522	1.07982	7.3913	1.2699	匆匆过客	103	52	51	48	25	23	匆匆过客	85	25	匆	27.2588	5	匆	27.2588	5	过	2727.03	6	客	488.493	9
258	从那之后	After that	4.88889	0.382707	4.13333	1.73991	5.16327	1.41932	7	1.47196	4.95652	0.366589	4.73913	1.00983	5.32	1.37598	6.68	1.14455	4.81818	0.394771	3.5	2.11007	5	1.47442	7.33333	1.711	从那之后	45	23	22	49	25	24	从那之后	36	18	从	1375.11	4	那	1762.02	6	之	2500.29	2	后	2743.81	6
260	从头到底	From top to bottom	5.37778	0.7772	4.88889	1.46508	5.33333	1.76651	7.10417	1.22456	5.56522	0.992063	5.30435	0.97397	5.41667	1.99819	7.25	0.84699	5.18182	0.394771	4.45455	1.76547	5.25	1.53934	6.95833	1.51741	从头到底	45	23	22	48	24	24	从头到底	43	25	从	1375.11	4	头	1198.71	5	到	4030.49	8	底	371.255	8
261	从下而上	From the bottom to the top	5.11628	0.390927	4.53488	1.42007	4.79167	1.70054	7.02083	1.0617	5.1	0.307794	4.9	1.16529	3.91304	1.64905	6.95652	0.975997	5.13043	0.457697	4.21739	1.56544	5.6	1.32288	7.08	1.15181	从下而上	43	20	23	48	23	25	从下而上	55	16	从	1375.11	4	下	2891.04	3	而	2283.95	6	上	5278.79	3
262	凑凑合合	Barely adapt or cope with	4.25581	0.953515	4.88372	1.19939	5.53191	1.62656	7.19149	1.035	4	0.794719	5.5	0.688247	5.43478	1.67403	6.95652	1.02151	4.47826	1.03877	4.34783	1.30065	5.625	1.61009	7.41667	1.01795	凑凑合合	43	20	23	47	23	24	凑凑合合	45	34	凑	22.9203	11	凑	22.9203	11	合	2129.25	6	合	2129.25	6
263	粗茶淡饭	A simple meal	5.53922	0.950993	4.52941	1.48728	5.40426	2.19346	7.53191	1.03946	5.58824	0.898365	4.96078	1.35589	4.52174	2.12922	7.3913	0.940944	5.4902	1.00742	4.09804	1.50007	6.25	1.9393	7.66667	1.12932	粗茶淡饭	102	51	51	47	23	24	粗茶淡饭	247	38	粗	75.1993	11	茶	154.365	9	淡	94.8944	11	饭	186.681	7
264	粗粗壮壮	Coarse and strong	5.18447	0.915526	4.97087	1.37525	4.83673	1.57251	6.87755	1.49489	5.42	0.810392	5.24	1.17038	4.52	1.63605	6.68	1.4922	4.96226	0.960013	4.71698	1.51121	5.16667	1.46456	7.08333	1.50121	粗粗壮壮	103	50	53	49	25	24	粗粗壮壮	16	34	粗	75.1993	11	粗	75.1993	11	壮	95.1897	6	壮	95.1897	6
267	粗通文墨	Barely know the rudiments	5.75	1.37609	4.97917	1.66937	5.5098	1.48825	6.56863	1.7805	5.79167	1.38247	5.33333	1.55106	5.07692	1.3542	6.38462	1.55118	5.70833	1.39811	4.625	1.73988	5.96	1.51327	6.76	2.00582	粗通文墨	48	24	24	51	26	25	粗通文墨	35	40	粗	75.1993	11	通	1622.23	10	文	2397.82	4	墨	84.4647	15
271	寸有所长	Every man has his merits	5.7551	1.07103	5.18367	1.78738	5.15385	1.50013	6.67308	1.74582	5.68	0.852447	5.4	1.35401	4.7037	1.51441	6.48148	1.76222	5.83333	1.27404	4.95833	2.15647	5.64	1.35031	6.88	1.73973	寸有所长	49	25	24	52	27	25	寸有所长	50	21	寸	44.8303	3	有	8648.03	6	所	2259.17	8	长	2117.13	4
272	错错落落	Strewn at random	4.55319	0.92803	5.08511	1.05973	5.04167	1.18426	6.41667	1.25195	4.73913	0.915393	5.04348	0.928256	4.83333	1.20386	6.375	1.0135	4.375	0.923721	5.125	1.191	5.25	1.15156	6.45833	1.47381	错错落落	47	23	24	48	24	24	错错落落	27	50	错	245.437	13	错	245.437	13	落	422.942	12	落	422.942	12
274	打擦边球	Play edge ball	4.86667	1.05744	5.55556	0.989847	4.85714	1.45774	7.04082	1.25763	4.85714	0.910259	5.33333	0.483046	5.04167	1.48848	6.5	1.17954	4.875	1.191	5.75	1.25974	4.68	1.43527	7.56	1.12101	打擦边球	45	21	24	49	24	25	打擦边球	66	38	打	847.707	5	擦	41.0573	17	边	577.86	5	球	607.207	11
277	打心底里	In the bottom of my heart	5.48039	0.982323	4.9902	1.4792	5.78431	1.51412	7.27451	1.16753	5.19608	0.490698	5.11765	0.972565	5.5	0.989949	6.73077	1.04145	5.76471	1.24239	4.86275	1.85494	6.08	1.89121	7.84	1.02794	打心底里	102	51	51	51	26	25	打心底里	63	24	打	847.707	5	心	2318.57	4	底	371.255	8	里	2015.7	7
278	打预防针	Preventive inoculation	4.86869	1.01666	5.48485	1.01382	4.83673	1.98271	7.20408	1.18988	5.2449	0.75085	5.32653	0.746876	4.91667	1.90917	6.83333	1.00722	4.5	1.11117	5.64	1.20814	4.76	2.08726	7.56	1.26095	打预防针	99	49	50	49	24	25	打预防针	78	28	打	847.707	5	预	180.893	10	防	480.569	6	针	199.347	7
279	大胆泼辣	Bold and pungent	5.58491	1.45973	6.12264	1.37808	5.46	1.7404	7.3	1.07381	6.11538	1.00301	6.15385	1.30436	5.52	1.78232	7.08	1.15181	5.07407	1.64663	6.09259	1.45717	5.4	1.73205	7.52	0.962635	大胆泼辣	106	52	54	50	25	25	大胆泼辣	41	34	大	6744.01	3	胆	93.5696	9	泼	29.526	8	辣	24.0056	14
281	大汗淋漓	Sweaty and sweating	4.23913	1.41711	5.6087	1.32461	5.57447	1.83853	7.53191	0.974703	4.21739	1.0853	5.43478	0.945135	5.5	1.69398	7.25	1.03209	4.26087	1.71139	5.78261	1.62247	5.65217	2.01379	7.82609	0.834058	大汗淋漓	46	23	23	47	24	23	大汗淋漓	616	33	大	6744.01	3	汗	59.7759	6	淋	41.0219	11	漓	6.49744	13
284	大老爷们	Mature man	5.18182	0.837436	5.31313	1.04634	4.73077	1.63438	7.38462	1.15731	5.04082	0.675746	5.12245	0.807069	4.37037	1.62073	7.07407	1.035	5.32	0.957036	5.5	1.21638	5.12	1.58955	7.72	1.2083	大老爷们	99	49	50	52	27	25	大老爷们	75	20	大	6744.01	3	老	1102.08	6	爷	131.162	6	们	4548.35	5
288	大相国寺	The daxiangguo temple	5.26087	0.647552	4.19565	1.83327	3.85417	1.54355	5.875	2.26561	5.26087	0.619192	4.65217	1.49571	3.82609	1.69631	5.95652	1.63702	5.26087	0.6887	3.73913	2.04978	3.88	1.42361	5.8	2.75379	大相国寺	46	23	23	48	23	25	大相国寺	105	26	大	6744.01	3	相	1565.14	9	国	9484.82	8	寺	55.9669	6
289	大型客车	Large bus	5.11111	0.531816	4.37778	1.4968	4.53061	1.78071	7.55102	1.33948	5.09091	0.294245	5	0.308607	3.96	1.6452	7.2	1.58114	5.13043	0.694416	3.78261	1.90589	5.125	1.75233	7.91667	0.928611	大型客车	45	22	23	49	25	24	大型客车	72	25	大	6744.01	3	型	563.925	9	客	488.493	9	车	1057.01	4
290	大专学校	Junior college; apprenticeship	4.83333	0.666241	4.47475	1.37279	4.40816	1.82481	6.89796	1.5034	5.08333	0.347228	4.91667	0.738985	3.875	1.56906	7.125	1.2619	4.59804	0.800123	4.05882	1.67823	4.92	1.93477	6.68	1.70098	大专学校	99	48	51	49	24	25	大专学校	103	25	大	6744.01	3	专	824.196	4	学	4035.57	8	校	241.942	10
292	代购代销	Buy and sell	5.02174	0.999758	4.5	1.36219	5.12	1.75708	6.72	1.53915	5.21739	0.599736	4.78261	0.951388	4.68	1.6	6.56	1.22746	4.82609	1.26678	4.21739	1.65025	5.56	1.82757	6.88	1.81016	代购代销	46	23	23	50	25	25	代购代销	105	30	代	2017.15	5	购	342.636	8	代	2017.15	5	销	404.836	12
294	待人处事	The way one gets along with people and treat things	5.45	0.814925	4.15	1.56156	6.17778	1.91037	7.64444	1.00353	5.42857	0.676123	4.61905	1.02353	5.8	1.84842	7.36	0.95219	5.47368	0.964274	3.63158	1.89181	6.65	1.92696	8	0.973329	待人处事	40	21	19	45	25	20	待人处事	59	21	待	326.983	9	人	10357.8	2	处	1051.23	5	世	1564.19	5
295	单打独斗	Go it alone	4.71739	1.39305	5.97826	1.10532	5.26087	1.7693	7.06522	1.20004	4.52174	0.947224	5.56522	0.727767	5	1.90238	6.72727	1.12045	4.91304	1.72977	6.3913	1.2699	5.5	1.64184	7.375	1.20911	单打独斗	46	23	23	46	22	24	单打独斗	275	26	单	747.548	8	打	847.707	5	独	390.408	9	斗	441.536	4
296	单口相声	Monologue comic talk	5.54348	1.12953	5.36957	1.37208	5.5	1.70945	7.1087	1.13975	5.72727	1.07711	5.59091	1.14056	5	1.67874	6.86957	1.14035	5.375	1.1726	5.16667	1.55106	6	1.62369	7.34783	1.11227	单口相声	46	22	24	46	23	23	单口相声	68	27	单	747.548	8	口	1079.29	3	相	1565.14	9	声	768.616	7
297	单门独户	Single door	4.92553	1.45206	4.74468	1.48131	4.7551	1.71429	6.67347	1.51915	5.375	1.55515	4.91667	1.44212	3.95833	1.51741	6.70833	1.26763	4.45652	1.19576	4.56522	1.53226	5.52	1.55778	6.64	1.75309	单门独户	47	24	23	49	24	25	单门独户	11	24	单	747.548	8	门	1206.79	3	独	390.408	9	户	381.035	4
298	单人沙发	Armchair	5.04545	0.370703	4.25	1.4647	5.32653	1.92989	7.26531	1.22092	4.95652	0.208514	5	0	4.92	1.6563	7.2	1.11803	5.14286	0.478091	3.42857	1.80476	5.75	2.13154	7.33333	1.34056	单人沙发	44	23	21	49	25	24	单人沙发	85	22	单	747.548	8	人	10357.8	2	沙	250.466	7	发	4277.54	5
299	单线铁路	Single line railway	4.97619	0.412494	4.92857	0.921104	3.875	1.87509	6.6875	1.35515	5	0.458831	5.15	0.366348	3.5	2	6.83333	1.12932	4.95455	0.37509	4.72727	1.20245	4.25	1.70038	6.54167	1.5598	单线铁路	42	20	22	48	24	24	单线铁路	88	39	单	747.548	8	线	755.686	8	铁	327.13	10	路	1036.73	13
301	淡然处之	Treat with indifference	5.93204	1.12252	4.41748	1.65402	6.55102	1.51467	7.20408	1.25797	5.61224	0.885445	4.91837	1.15175	6.08333	1.6129	7	0.978019	6.22222	1.23879	3.96296	1.90296	7	1.29099	7.4	1.47196	淡然处之	103	49	54	49	24	25	淡然处之	58	30	淡	94.8944	11	然	1095.5	12	处	1051.23	5	之	2500.29	2
302	淡妆浓抹	Light and heavy make-up	4.2766	1.6379	5.55319	1.13843	6.10204	1.48948	7	1.48605	4.25	1.48177	5.45833	1.10253	5.96	1.51327	6.76	1.33167	4.30435	1.81996	5.65217	1.19121	6.25	1.48177	7.25	1.62186	淡妆浓抹	47	24	23	49	25	24	淡妆浓抹	50	34	淡	94.8944	11	妆	22.0365	6	浓	78.0714	9	抹	22.4665	8
305	弹指之间	In a short moment	5.16505	0.728914	4.94175	1.29725	4.46939	1.92681	6.97959	1.46472	5.35294	0.687707	5.15686	0.833608	4.56	2.02237	6.64	1.55134	4.98077	0.727348	4.73077	1.61021	4.375	1.86063	7.33333	1.30773	弹指之间	103	51	52	49	25	24	弹指之间	42	29	弹	245.239	11	指	964.138	9	之	2500.29	2	间	1602.34	7
313	倒数计时	Countdown	4.97778	0.811533	5.93333	1.52852	4.65306	2.41998	7.36735	1.37982	5.18182	0.664499	5.45455	1.1434	4.64	2.43036	7.16	1.21381	4.78261	0.902347	6.3913	1.72519	4.66667	2.46129	7.58333	1.5299	倒数计时	45	22	23	49	25	24	倒数计时	35	34	倒	242.688	10	数	1155.01	13	计	1239.78	4	时	4274.09	7
314	道德法庭	Moral tribunal	5.35556	0.98062	5.37778	1.23009	3.36	2.05794	6.86	1.67831	5.65217	1.0273	5.43478	1.16096	3.6	2.17945	6.76	1.66533	5.04545	0.843873	5.31818	1.32328	3.12	1.94336	6.96	1.7195	道德法庭	45	23	22	50	25	25	道德法庭	44	44	道	2174.2	12	德	831.45	15	法	3154.31	8	庭	288.381	9
315	道法自然	Learn from nature	5.53191	0.905324	4.44681	1.5716	4.19149	1.84907	5.97872	1.97252	5.47826	0.947224	4.78261	1.56544	4.08333	1.44212	5.5	1.71945	5.58333	0.880547	4.125	1.5411	4.30435	2.22455	6.47826	2.12922	道法自然	47	23	24	47	24	23	道法自然	90	38	道	2174.2	12	法	3154.31	8	自	3316.74	6	然	1095.5	12
317	灯红酒绿	Scene of debauchery	4.46939	1.63429	5.73469	1.23787	4.79167	1.63679	6.9375	1.42031	4.4	1.44338	5.4	1.25831	4.95833	1.51741	6.41667	1.58572	4.54167	1.84106	6.08333	1.1389	4.625	1.76469	7.45833	1.02062	灯红酒绿	49	25	24	48	24	24	灯红酒绿	411	33	灯	136.308	6	红	461.971	6	酒	253.867	10	绿	200.236	11
320	滴滴答答	Tick	4.9901	0.746402	4.70792	1.14119	4.84783	1.0534	6.93478	1.28931	4.9798	0.654339	4.91919	0.791237	4.82609	1.07247	6.3913	1.23359	5	0.828417	4.50485	1.37109	4.86957	1.05763	7.47826	1.12288	滴滴答答	202	99	103	46	23	23	滴滴答答	119	52	滴	31.5006	14	滴	31.5006	14	答	284.035	12	答	284.035	12
322	地老天荒	The end of life	5.83019	1.71532	5.66038	1.52993	3.55102	1.86035	6.95918	1.63247	4.88462	1.50364	5.44231	1.19498	3.4	2	6.44	1.98074	6.74074	1.38979	5.87037	1.78089	3.70833	1.73153	7.5	0.932505	地老天荒	106	52	54	49	25	24	地老天荒	97	25	地	4442.5	6	老	1102.08	6	天	2247.5	4	荒	89.3849	9
323	第六感官	Sixth senses	5.09524	0.484367	4.52381	1.48551	4.85714	1.95789	6.61224	1.72984	5.09524	0.624881	5.09524	0.830949	4.08333	1.69184	6	1.44463	5.09524	0.300793	3.95238	1.77415	5.6	1.93649	7.2	1.80278	第六感官	42	21	21	49	24	25	第六感官	20	36	第	1916.11	11	六	288.051	4	感	1003.13	13	官	513.013	8
326	点头之交	Nodding acquaintance	4.97826	0.881643	4.84783	1.31601	5.89583	1.43274	7.16667	1.11724	4.90909	0.683763	5.18182	0.394771	5.54167	1.41357	6.625	1.09594	5.04167	1.0417	4.54167	1.74404	6.25	1.39096	7.70833	0.858673	点头之交	46	22	24	48	24	24	点头之交	21	22	点	1546.3	9	头	1198.71	5	之	2500.29	2	交	1106.25	6
327	电报挂号	Telegraph registration	4.95455	0.301511	4.47727	1.67733	4.76471	1.79542	6.21569	1.87951	5	0	5	1.09545	3.92308	1.57285	6.69231	1.31967	4.91304	0.417029	4	1.97714	5.64	1.60416	5.72	2.24574	电报挂号	44	21	23	51	26	25	电报挂号	81	26	电	2197.76	5	报	2394.79	7	挂	91.4446	9	号	427.306	5
328	电光闪闪	Light flash	5.20408	1.25797	5.5102	1.54276	3.93617	1.67338	6.40426	1.55563	5	1.22474	5.4	1.35401	3.16667	1.63299	6.20833	1.17877	5.41667	1.28255	5.625	1.73988	4.73913	1.32175	6.6087	1.87663	电光闪闪	49	25	24	47	24	23	电光闪闪	49	21	电	2197.76	5	光	802.844	6	闪	85.2078	5	闪	85.2078	5
329	电教中心	Audio-visual center	5.07143	0.260661	4.61905	1.30575	4.3617	1.69943	6.48936	1.82819	5	0	5.1	0.447214	3.73913	1.54383	6.56522	1.19947	5.13636	0.35125	4.18182	1.65145	4.95833	1.65448	6.41667	2.30154	电教中心	42	20	22	47	23	24	电教中心	67	24	电	2197.76	5	教	1594.79	11	中	7314.64	4	心	2318.57	4
330	电视教学	Tv teaching	5.43478	0.688062	4.63043	1.4508	4.61224	1.83503	7.22449	1.17731	5.54167	0.658005	5.20833	1.02062	4.08333	1.66594	7.04167	1.12208	5.31818	0.716231	4	1.60357	5.12	1.87794	7.4	1.22474	电视教学	46	24	22	49	24	25	电视教学	100	32	电	2197.76	5	视	842.207	8	教	1594.79	11	学	4035.57	8
331	电视明星	Tv star	5.73585	1.11528	5.22642	1.68061	4.48889	1.25449	7.06667	1.42063	5.64151	0.879124	5.16981	1.26697	4.40909	1.14056	6.45455	1.37069	5.83019	1.31172	5.28302	2.02273	4.56522	1.37597	7.65217	1.22877	电视明星	106	53	53	45	22	23	电视明星	67	30	电	2197.76	5	视	842.207	8	明	1782.89	8	星	711.731	9
332	电影拷贝	Movie copy	5.34783	0.640048	4.43478	1.39287	5.32	2.17068	7	1.34012	5.17391	0.387553	5.13043	0.457697	4	1.89297	6.68	1.4922	5.52174	0.790257	3.73913	1.65742	6.64	1.55134	7.32	1.10755	电影拷贝	46	23	23	50	25	25	电影拷贝	64	33	电	2197.76	5	影	820.571	15	拷	3.26879	9	贝	140.934	4
333	电子手表	Digital watch	5.05	0.479372	4.4	1.39986	6.17391	2.16338	7.63043	1.19923	5.06122	0.242226	4.71429	1.08012	4.72727	1.51757	7	1.23443	5.03922	0.631214	4.09804	1.60318	7.5	1.79371	8.20833	0.832971	电子手表	100	49	51	46	22	24	电子手表	80	20	电	2197.76	5	子	3348.01	3	手	1414.05	4	表	1854.42	8
334	电子玩具	Electronic toy	5.34783	0.736882	4.82609	1.72954	5.97917	2.12873	7.54167	1.11008	5.27273	0.631085	5.13636	1.08213	4.91304	1.90485	6.95652	1.06508	5.41667	0.829702	4.54167	2.14637	6.96	1.85921	8.08	0.862168	电子玩具	46	22	24	48	23	25	电子玩具	89	24	电	2197.76	5	子	3348.01	3	玩	120.326	8	具	771.698	8
335	电子字典	Electronic dictionary	5.42222	0.965046	4.82222	1.45053	5.44	2.18679	7.06	1.84513	5.56522	1.12112	5.04348	1.60902	3.88	1.45258	6.12	2.10792	5.27273	0.767297	4.59091	1.2596	7	1.60728	8	0.816497	电子字典	45	23	22	50	25	25	电子字典	54	22	电	2197.76	5	子	3348.01	3	字	580.813	6	典	234.908	8
336	跌打滚爬	Tumble and climb	4.73913	1.35704	5.67391	1.01224	5.78	1.81029	7	1.48461	5	1.50756	5.43478	1.07982	5.6	1.95789	7	1.08012	4.47826	1.16266	5.91304	0.900154	5.96	1.67033	7	1.82574	跌打滚爬	46	23	23	50	25	25	跌打滚爬	23	38	跌	49.466	12	打	847.707	5	滚	54.9843	13	爬	40.6871	8
338	叮叮咚咚	Ding ding dong dong	4.3617	1.29255	5.2766	1.2459	5	1.1547	6.97959	1.37674	4.25	1.35935	5.45833	0.977093	4.875	1.32902	6.83333	1.27404	4.47826	1.23838	5.08696	1.47442	5.12	0.971253	7.12	1.48099	叮叮咚咚	47	24	23	49	24	25	叮叮咚咚	90	26	叮	17.5912	5	叮	17.5912	5	咚	5.8279	8	咚	5.8279	8
339	顶风冒雨	Against wind and rain	4.61905	1.42357	5.79048	1.10676	4.7551	2.25952	7.26531	1.05624	5.13208	1.35927	5.50943	1.18683	4.79167	2.44912	7.16667	1.09014	4.09615	1.30248	6.07692	0.946535	4.72	2.11187	7.36	1.03602	顶风冒雨	105	53	52	49	24	25	顶风冒雨	88	29	顶	145.409	8	风	877.382	4	冒	100.707	9	雨	172.54	8
340	定向招生	Orienteering enrolment	5.2	0.587754	4.68889	1.36219	3.72	1.72662	7.26	1.22574	5.31818	0.779888	5.04545	1.21409	3.96	1.81384	6.68	1.28193	5.08696	0.288104	4.34783	1.43364	3.48	1.63605	7.84	0.85049	定向招生	45	22	23	50	25	25	定向招生	90	27	定	2561.47	8	向	1061.38	6	招	207.341	8	生	4823.71	5
343	丢卒保车	Sacrifice minor things to save major ones	4.69388	1.54386	5.63265	1.45336	4.86275	1.93927	6.84314	1.37655	4.48	1.68622	5.32	1.51987	4.74074	2.123	6.92593	1.26873	4.91667	1.38051	5.95833	1.33447	5	1.74456	6.75	1.51083	丢卒保车	49	25	24	51	27	24	丢卒保车	41	27	丢	39.1303	6	卒	6.25453	8	保	1336.89	9	车	1057.01	4
344	东奔西忙	Busy	4.08511	1.1	5.59574	1.24516	4.4375	1.9776	7.14583	1.2546	4.34783	1.11227	5.47826	1.50362	5.33333	1.88049	7.16667	1.09014	3.83333	1.0495	5.70833	0.954585	3.54167	1.66757	7.125	1.42379	东奔西忙	47	23	24	48	24	24	东奔西忙	16	25	东	1271.91	5	奔	92.0141	8	西	1589.34	6	忙	140.396	6
345	东征西战	Snoring around	4.79167	1.68798	6.02083	1.55042	3.86	1.90606	6.82	1.73429	4.76	1.85472	5.76	1.42244	4.08	2.13931	7.04	1.09848	4.82609	1.52709	6.30435	1.66337	3.64	1.65529	6.6	2.19848	东征西战	48	25	23	50	25	25	东征西战	18	28	东	1271.91	5	征	302.985	8	西	1589.34	6	战	1502.44	9
346	冬虫夏草	Cordyceps sinensis	5.54902	0.929468	4.58824	1.51136	4.73585	1.85172	7.37736	1.33339	5.28	0.671277	4.94	1.0184	4.10714	1.77094	7.10714	1.28638	5.80769	1.06713	4.25	1.81362	5.44	1.70978	7.68	1.34536	冬虫夏草	102	50	52	53	28	25	冬虫夏草	325	30	冬	103.113	5	虫	96.5125	6	夏	160.525	10	草	267.558	9
348	动物纤维	Animal fiber	5	0	4	1.60357	5.26	1.0844	6.26	1.74742	5	0	4.5	1.01183	4.96	0.840635	6.08	1.73013	5	0	3.47619	1.93956	5.56	1.22746	6.44	1.78139	动物纤维	43	22	21	50	25	25	动物纤维	70	31	动	3207.89	6	物	1894.3	8	纤	38.9799	6	维	231.345	11
349	洞若观火	To see things very clearly	4.73913	1.46719	5.43478	1.48552	5.32	1.65911	5.7	2.05287	4.31818	1.46015	5.45455	1.53459	4.76	0.723418	5.48	1.71075	5.125	1.39292	5.41667	1.47196	5.88	2.10792	5.92	2.3615	洞若观火	46	22	24	50	25	25	洞若观火	105	27	洞	95.9212	9	若	216.964	8	观	879.674	6	火	508.645	4
350	都市农业	Urban agriculture	5.22222	0.703526	4.46667	1.73991	4.71429	1.56791	6.30612	1.68577	5.14286	0.358569	4.71429	1.0556	4.125	1.59653	6.375	1.40844	5.29167	0.907896	4.25	2.17196	5.28	1.33915	6.24	1.94251	都市农业	45	21	24	49	24	25	都市农业	91	26	都	1508.91	10	市	2160.53	5	农	529.837	6	业	1866.64	5
352	斗转星移	Passing of night	5.45098	0.981285	4.91176	1.39378	3.04082	1.56736	7.14286	1.35401	5.5098	0.902719	5.23529	1.03128	2.91667	1.81579	6.95833	1.65448	5.39216	1.05978	4.58824	1.62698	3.16	1.31276	7.32	0.988264	斗转星移	102	51	51	49	24	25	斗转星移	270	32	斗	441.536	4	转	690.434	8	星	711.731	9	移	236.362	11
354	独行其是	Do what one thinks is right regardless of others	4.26087	1.10423	5.52174	1.42578	5.36957	1.73024	6.23913	1.79115	4.31818	0.779888	5.22727	1.34277	5.13043	1.7137	6.65217	0.647281	4.20833	1.35066	5.79167	1.47381	5.6087	1.75134	5.82609	2.40553	独行其是	46	22	24	46	23	23	独行其是	34	32	独	390.408	9	行	3839.45	6	其	1873.8	8	是	9027.33	9
355	独门独户	Alone	4.95455	0.645361	5.06818	1.26487	5.25	1.45134	6.9375	1.39003	5.14286	0.478091	5.04762	0.86465	4.78261	1.44463	6.86957	1.05763	4.78261	0.735868	5.08696	1.56417	5.68	1.34536	7	1.65831	独门独户	44	21	23	48	23	25	独门独户	42	25	独	390.408	9	门	1206.79	3	独	390.408	9	户	381.035	4
356	睹物思人	The thing reminds one of its owner	4.95833	1.62374	5.54167	1.48694	5.06122	2.0454	7.46939	1.17442	5.04167	1.36666	5.45833	1.21509	5.70833	1.75646	7.16667	0.916831	4.875	1.87228	5.625	1.73988	4.44	2.14243	7.76	1.33167	睹物思人	48	24	24	49	24	25	睹物思人	84	32	睹	8.94564	13	物	1894.3	8	思	1002.68	9	人	10357.8	2
377	耳朵根子	Ear	4.79545	0.509425	4.22727	1.55315	4.81633	1.70384	7.14286	1.1547	4.90909	0.294245	4.68182	1.2868	4.6	1.73205	6.92	1.15181	4.68182	0.646335	3.77273	1.68839	5.04167	1.68056	7.375	1.13492	耳朵根子	44	22	22	49	25	24	耳朵根子	14	25	耳	161.511	6	朵	43.6973	6	根	669.907	10	子	3348.01	3
379	耳濡目染	Be influenced by what one constantly sees and hears	5.8	1.23583	5.2	1.72679	4.80851	1.94085	7.40426	1.19163	5.86364	1.32001	5.86364	1.28343	4.83333	1.85722	7.04167	1.30148	5.73913	1.17618	4.56522	1.87873	4.78261	2.0661	7.78261	0.951388	耳濡目染	45	22	23	47	24	23	耳濡目染	454	37	耳	161.511	6	濡	0.794744	17	目	1386.17	5	染	212.159	9
380	二次能源	Secondary energy	5.69565	1.15219	5.43478	1.1086	5.01887	1.52531	6.90566	1.45792	5.56522	0.945135	5.65217	0.934622	4.57143	1.73052	6.39286	1.54774	5.82609	1.33662	5.21739	1.24157	5.52	1.08474	7.48	1.1225	二次能源	46	23	23	53	28	25	二次能源	76	31	二	1132.69	2	次	1204.15	6	能	2883.75	10	源	446.359	13
381	二龙戏珠	Two dragons are playing with a pearl	5.7551	0.902095	5.63265	1.49574	4.36735	1.4097	6.08163	2.10987	5.72	0.979796	5.68	1.249	3.84	1.772	6.24	2.02649	5.79167	0.832971	5.58333	1.74248	4.91667	0.50361	5.91667	2.2247	二龙戏珠	49	25	24	49	25	24	二龙戏珠	101	23	二	1132.69	2	龙	254.841	5	戏	234.451	6	珠	46.417	10
382	法国梧桐	Oriental plane	5.41304	0.832028	4.5	1.62959	5	1.34164	6.29412	1.8793	5.13636	0.35125	4.5	1.26303	4.65385	1.32491	6.42308	1.52769	5.66667	1.0495	4.5	1.93368	5.36	1.28712	6.16	2.21133	法国梧桐	46	22	24	51	26	25	法国梧桐	88	37	法	3154.31	8	国	9484.82	8	梧	3.69747	11	桐	3.45591	10
383	帆船运动	Sailing	5.52174	0.862532	5.54348	1.60148	5.04	1.61574	6.74	1.46817	5.68182	0.779888	6.04545	1.3965	4.69231	1.66779	6.57692	1.30148	5.375	0.923721	5.08333	1.66594	5.41667	1.50121	6.91667	1.63964	帆船运动	46	22	24	50	26	24	帆船运动	91	30	帆	19.87	6	船	230.498	11	运	1103.47	7	动	3207.89	6
391	泛泛而谈	Speak generally	4.3125	1.25742	4.8125	1.52506	5.53061	1.58248	7.06122	1.63819	4.5	1.28537	4.66667	1.52277	5.44	1.38684	6.56	1.85023	4.125	1.22696	4.95833	1.5458	5.625	1.78916	7.58333	1.21285	泛泛而谈	48	24	24	49	25	24	泛泛而谈	65	30	泛	128.43	7	泛	128.43	7	而	2283.95	6	谈	527.48	10
392	泛泛之交	A speaking acquaintance	4.49524	0.856242	4.77143	1.1457	5.52083	1.2546	7.04167	1.54312	4.59615	0.7211	4.86538	1.04841	5.43478	1.47174	6.91304	1.16436	4.39623	0.967543	4.67925	1.23683	5.6	1.04083	7.16	1.8412	泛泛之交	105	52	53	48	23	25	泛泛之交	48	22	泛	128.43	7	泛	128.43	7	之	2500.29	2	交	1106.25	6
395	防弹背心	Bulletproof vest	5.24752	0.684192	5.17822	1.26013	4.9	2.19694	6.7	2.02283	5.10204	0.42056	5.08163	0.640206	4.04	2.11108	6.52	2.0025	5.38462	0.843751	5.26923	1.64633	5.76	1.96384	6.88	2.06801	防弹背心	101	49	52	50	25	25	防弹背心	92	30	防	480.569	6	弹	245.239	11	背	202.778	9	心	2318.57	4
396	防弹玻璃	Bullet-proof glass	5.18182	0.522233	4.85859	1.36285	4.64	2.03801	7.02	1.2534	5.16667	0.595491	4.95833	0.966642	3.81481	1.90217	6.77778	1.2195	5.19608	0.44809	4.76471	1.65636	5.6087	1.77711	7.30435	1.25896	防弹玻璃	99	48	51	50	27	23	防弹玻璃	85	40	防	480.569	6	弹	245.239	11	玻	33.7229	9	璃	36.6692	14
397	防洪设施	Flood control facilities	5.13636	0.701855	4.63636	1.47996	4.55769	2.10893	7.13462	1.08517	5	0	4.95	0.604805	3.96429	2.25228	7.07143	1.15241	5.25	0.944089	4.375	1.9068	5.25	1.72576	7.20833	1.02062	防洪设施	44	20	24	52	28	24	防洪设施	82	30	防	480.569	6	洪	32.0892	9	设	1306.97	6	施	549.517	9
398	防护林带	Shelterbelt	5.70588	0.874142	4.84314	1.52695	4.61224	1.81218	7.12245	1.14805	5.84314	0.987371	5.19608	1.49692	4.45833	2.06375	7.04167	0.954585	5.56863	0.728146	4.4902	1.48825	4.76	1.56205	7.2	1.32288	防护林带	102	51	51	49	24	25	防护林带	164	30	防	480.569	6	护	554.773	7	林	572.211	8	带	651.825	9
399	防汛抗洪	Flood prevention and flood control	5.37778	1.38644	6.08889	1.4897	4.07843	2.25249	7.43137	1.10009	5.61905	1.2836	6.09524	1.13599	3.85185	2.53747	7.37037	1.07946	5.16667	1.46456	6.08333	1.76725	4.33333	1.90347	7.5	1.14208	防汛抗洪	45	21	24	51	27	24	防汛抗洪	232	28	防	480.569	6	汛	4.33775	6	抗	316.863	7	洪	32.0892	9
401	非亲非故	Be neither relative nor friend	4.3913	1.1051	4.69565	1.57578	4.67347	1.57305	7.06122	1.14397	4.82609	0.886883	4.65217	0.982052	4.8	1.68325	6.8	1.08012	3.95652	1.14726	4.73913	2.02748	4.54167	1.47381	7.33333	1.16718	非亲非故	46	23	23	49	25	24	非亲非故	152	34	非	678.212	8	亲	659.671	9	非	678.212	8	故	384.416	9
402	非我族类	Outsider	4.15686	1.01225	5.57843	1.05714	4.2449	1.45101	5.95918	1.84796	4.44	0.951047	5.32	0.683329	4.125	1.51263	6.125	1.22696	3.88462	1.00301	5.82692	1.27911	4.36	1.41067	5.8	2.3094	非我族类	102	50	52	49	24	25	非我族类	63	35	非	678.212	8	我	4474.19	7	族	602.862	11	类	664.378	9
407	分兵把守	Divide the forces for defense	5.06383	1.1685	5.42553	1.19318	4.85417	2.15357	6.52083	1.89051	5.21739	1.1264	5.56522	1.07982	4.2	2.3094	6.72	1.45831	4.91667	1.21285	5.29167	1.30148	5.56522	1.7536	6.30435	2.28503	分兵把守	47	23	24	48	25	23	分兵把守	45	24	分	3077.2	4	兵	551.831	7	把	868.978	7	守	239.788	6
408	纷纷而至	One after another	5.13636	1.00211	5.11364	1.46614	4.88889	1.58433	6.84444	1.1862	5.33333	0.795822	5.33333	0.856349	4.86957	1.5755	6.69565	1.01957	4.95652	1.14726	4.91304	1.85651	4.90909	1.63034	7	1.34519	纷纷而至	44	21	23	45	23	22	纷纷而至	34	26	纷	91.1554	7	纷	91.1554	7	而	2283.95	6	至	846.806	6
409	纷纷扬扬	Fluttering	4.97872	1.49622	5.61702	1.43789	4.97917	0.956269	7.04167	1.27092	4.95652	1.36443	5.78261	1.0853	4.96	0.734847	6.76	1.26754	5	1.64184	5.45833	1.71893	5	1.16775	7.34783	1.22877	纷纷扬扬	47	23	24	48	25	23	纷纷扬扬	406	26	纷	91.1554	7	纷	91.1554	7	扬	175.527	6	扬	175.527	6
413	风吹不动	No wind hurts	5.21569	0.981285	4.71569	1.34516	5.26	1.93581	6.84	1.40495	5.18367	0.950295	4.91837	1.11499	4.8	2.21736	6.88	1.30128	5.24528	1.01727	4.5283	1.51408	5.72	1.51438	6.8	1.52753	风吹不动	102	49	53	50	25	25	风吹不动	13	21	风	877.382	4	吹	62.265	7	不	9822.27	4	动	3207.89	6
414	风吹浪打	Be beaten by wind and waves	4.85106	1.35099	5.70213	1.34996	3.8	1.90595	6.86	1.64143	4.82609	1.40299	5.34783	1.6127	3.6	1.84842	6.76	1.56205	4.875	1.32902	6.04167	0.954585	4	1.97906	6.96	1.74356	风吹浪打	47	23	24	50	25	25	风吹浪打	101	26	风	877.382	4	吹	62.265	7	浪	128.776	10	打	847.707	5
415	风吹雨淋	Wind and rain	4.11364	1.24295	5.61364	0.654711	3.54717	1.48798	7.39623	0.926939	4.36364	1.21677	5.68182	0.779888	3.60714	1.66309	7.17857	0.862965	3.86364	1.24577	5.54545	0.509647	3.48	1.29486	7.64	0.95219	风吹雨淋	44	22	22	53	28	25	风吹雨淋	112	30	风	877.382	4	吹	62.265	7	雨	172.54	8	淋	41.0219	11
417	风风火火	Be rash and too much in haste	5.65385	1.23673	5.875	1.13794	5.44681	1.54369	6.85106	1.19744	5.49057	1.17051	5.64151	1.12821	4.78261	1.62247	6.78261	0.850482	5.82353	1.2916	6.11765	1.1072	6.08333	1.17646	6.91667	1.47196	风风火火	104	53	51	47	23	24	风风火火	687	16	风	877.382	4	风	877.382	4	火	508.645	4	火	508.645	4
422	风流云散	Dispersed by the wind and scattered like the clouds	5.3913	0.954015	4.71739	1.18627	3.9375	1.34332	6.1875	1.51104	5.54167	0.779028	4.95833	0.999094	3.75	1.35935	6.04167	1.23285	5.22727	1.10978	4.45455	1.3355	4.125	1.32902	6.33333	1.76109	风流云散	46	24	22	48	24	24	风流云散	73	30	风	877.382	4	流	948.45	10	云	264.003	4	散	236.394	12
426	风土民情	Customs	5.71287	0.973002	4.93069	1.28263	3.83333	1.54828	7.20833	1.14777	5.42553	0.616606	5.06383	0.704157	3.30435	1.57926	6.95652	1.02151	5.96296	1.14863	4.81481	1.62613	4.32	1.37598	7.44	1.22746	风土民情	101	47	54	48	23	25	风土民情	65	23	风	877.382	4	土	568.512	3	民	2137.66	5	情	1729.84	11
427	蜂拥而起	Rise up	4.53333	1.32459	5.93333	1.13618	4.10204	1.79403	7.10204	1.31093	4.59091	1.09801	5.59091	0.908116	4.28	2.0108	6.76	1.45144	4.47826	1.53355	6.26087	1.25109	3.91667	1.55806	7.45833	1.06237	蜂拥而起	45	22	23	49	25	24	蜂拥而起	44	37	蜂	29.4811	13	拥	169.853	8	而	2283.95	6	起	2047.96	10
429	奉天承运	According to god's instructions	5.7234	1.22833	5.48936	1.66645	2.97917	1.83917	6.875	1.60617	5.54167	0.832971	4.95833	1.57367	2.91667	1.76725	6.20833	1.74404	5.91304	1.53484	6.04348	1.60902	3.04167	1.94443	7.54167	1.14129	奉天承运	47	24	23	48	24	24	奉天承运	51	27	奉	100.157	8	天	2247.5	4	承	206.993	8	运	1103.47	7
430	佛门子弟	Son of buddha	5.20455	0.593748	4.31818	1.66737	4.28571	1.63299	6.5102	1.67235	5.17391	0.716822	5.26087	0.6887	3.875	1.62354	6.54167	1.21509	5.2381	0.436436	3.28571	1.82052	4.68	1.57374	6.48	2.04369	佛门子弟	44	23	21	49	24	25	佛门子弟	25	20	佛	176.567	7	门	1206.79	3	子	3348.01	3	弟	196.76	7
434	扶优限劣	Support successful enterprises and restrict unsuccessful ones	5.6	1.7761	5.51111	1.48664	5.5625	1.85548	6.14583	2.22165	6.13636	1.69861	5.77273	1.79767	5.625	1.86063	6.04167	1.80529	5.08696	1.72977	5.26087	1.09617	5.5	1.88818	6.25	2.60851	扶优限劣	45	22	23	48	24	24	扶优限劣	47	27	扶	77.9652	7	优	480.896	6	限	484.816	8	劣	64.4913	6
435	浮浮沉沉	Floating ups and downs	4.22917	0.880995	5.10417	1.32472	4.04348	1.45993	6.76087	1.21445	4.24	0.969536	5.28	1.02144	4.09091	1.65929	6.45455	0.911685	4.21739	0.795243	4.91304	1.59297	4	1.28537	7.04167	1.39811	浮浮沉沉	48	25	23	46	22	24	浮浮沉沉	19	34	浮	79.9113	10	浮	79.9113	10	沉	227.009	7	沉	227.009	7
439	俯仰之间	In the twinling of an eye	5.26667	0.83666	4.75556	1.35102	5.12766	1.3771	6.40426	1.75276	5.27273	0.550482	4.68182	0.893701	5.34783	0.647281	5.82609	1.23038	5.26087	1.05388	4.82609	1.69631	4.91667	1.81579	6.95833	2.01039	俯仰之间	45	22	23	47	23	24	俯仰之间	32	25	俯	8.59726	10	仰	74.64	6	之	2500.29	2	间	1602.34	7
440	父母之邦	The motherland	5.70213	1.0197	5.02128	1.79963	3.95745	1.75645	5.7234	2.01842	5.66667	1.20386	5.20833	1.53167	3.69565	1.69048	6.30435	1.4596	5.73913	0.810016	4.82609	2.05939	4.20833	1.81729	5.16667	2.33437	父母之邦	47	24	23	47	23	24	父母之邦	55	17	父	161.781	4	母	361.624	5	之	2500.29	2	邦	45.0364	6
448	敢字当头	Put daring above all else	5.80851	1.37743	6.44681	1.39578	5.8913	1.77924	6.73913	1.35704	6.34783	0.934622	6	1.5667	5.6087	2.03914	7	0.852803	5.29167	1.5458	6.875	1.07592	6.17391	1.46636	6.47826	1.70213	敢字当头	47	23	24	46	23	23	敢字当头	57	28	敢	168.117	11	字	580.813	6	当	1983.76	6	头	1198.71	5
451	干柴烈火	Easy on trigger	5.125	1.85226	6.20833	1.52927	4.57143	1.82574	6.93878	1.32929	5.08	1.82392	6.32	1.51987	4.32	2.01494	6.64	1.28712	5.17391	1.92241	6.08696	1.56417	4.83333	1.60615	7.25	1.32698	干柴烈火	48	25	23	49	25	24	干柴烈火	19	27	干	755.392	3	柴	35.7513	10	烈	255.312	10	火	508.645	4
455	高高矮矮	Tall and short	4.71111	0.626034	4.24444	1.58337	4.70213	1.44335	6.87234	1.34515	4.54167	0.72106	4.83333	0.963087	4.08696	1.23998	6.73913	1.17618	4.90476	0.436436	3.57143	1.88604	5.29167	1.39811	7	1.50362	高高矮矮	45	24	21	47	23	24	高高矮矮	48	46	高	2199.88	10	高	2199.88	10	矮	18.2186	13	矮	18.2186	13
457	高架道路	Viaduct	5.02273	0.505258	4.29545	1.67859	4.08163	1.56574	7.20408	1.20726	5.04348	0.638055	4.86957	0.967863	3.73077	1.84516	6.96154	1.24838	5	0.316228	3.66667	2.05751	4.47826	1.08165	7.47826	1.12288	高架道路	44	23	21	49	26	23	高架道路	74	44	高	2199.88	10	架	149.34	9	道	2174.2	12	路	1036.73	13
458	高谈阔论	Declaim	4.57447	1.79061	5.82979	1.53678	5.75	1.78051	7.25	1.06191	4.78261	1.85758	5.73913	1.65742	5.36	1.91224	7.28	0.936305	4.375	1.73988	5.91667	1.44212	6.17391	1.55657	7.21739	1.20441	高谈阔论	47	23	24	48	25	23	高谈阔论	850	38	高	2199.88	10	谈	527.48	10	阔	68.8073	12	论	1173.48	6
460	高中会考	High school examinations	5.0404	0.768237	5.14141	1.35534	4.08	2.39762	7.4	1.27775	5.08333	0.453513	5.02083	0.729021	3.08	1.55242	6.92	1.38203	5	0.979796	5.2549	1.7532	5.08	2.69134	7.88	0.971253	高中会考	99	48	51	50	25	25	高中会考	76	26	高	2199.88	10	中	7314.64	4	会	5204.67	6	考	527.554	6
463	咯吱咯吱	Creak	4.1087	1.01605	4.8913	1.30347	4.7451	1.35415	6.80392	1.5623	4.08333	0.974308	4.70833	1.33447	4.62963	1.07946	6.55556	1.28103	4.13636	1.08213	5.09091	1.26901	4.875	1.62354	7.08333	1.81579	咯吱咯吱	46	24	22	51	27	24	咯吱咯吱	143	32	咯	6.48656	9	吱	7.42147	7	咯	6.48656	9	吱	7.42147	7
464	革命故事	Revolutionary story	5.78302	1.05112	5.61321	1.73244	4.27083	1.6978	7.1875	1.17882	6.05556	1.10602	5.94444	1.26516	4.04167	1.65448	6.91667	1.41165	5.5	0.918225	5.26923	2.06858	4.5	1.74456	7.45833	0.832971	革命故事	106	54	52	48	24	24	革命故事	79	34	革	546.166	9	命	1075.17	8	故	384.416	9	事	2624.46	8
467	各行其是	Each does what is right in his own eyes	4.625	1.44884	4.92045	1.42411	5.17391	1.76766	7	1.29957	4.28889	1.29021	5.17778	0.805912	5	1.62369	6.95652	0.76742	4.97674	1.53512	4.65116	1.83723	5.34783	1.92138	7.04348	1.69164	各行其是	88	45	43	46	23	23	各行其是	430	29	各	1258.9	6	行	3839.45	6	其	1873.8	8	是	9027.33	9
472	各有所好	Everyone has his hobby	5.42157	0.872419	5	1.13452	5.61224	1.77736	7.22449	1.17731	5.43396	0.950899	5.24528	1.0544	5.2	1.63299	7	1.08012	5.40816	0.788415	4.73469	1.16861	6.04167	1.85283	7.45833	1.25036	各有所好	102	53	49	49	25	24	各有所好	106	26	各	1258.9	6	有	8648.03	6	所	2259.17	8	好	1953.46	6
474	亘古未有	Unprecedented	5.6	0.939052	5.86667	1.67332	4.21154	1.56351	5.78846	2.1451	5.47826	0.947224	5.65217	1.46501	4.37037	1.62073	5.18519	2.14901	5.72727	0.935125	6.09091	1.87487	4.04	1.51327	6.44	1.98074	亘古未有	45	23	22	52	27	25	亘古未有	94	22	亘	1.46089	6	古	540.629	5	未	595.662	5	有	8648.03	6
477	更名改姓	Change one's whole name	4.14894	1.23321	4.97872	1.66145	5.54167	1.92363	6.6875	1.53202	4.17391	1.40299	5.08696	1.34547	5.20833	1.99955	6.875	1.07592	4.125	1.07592	4.875	1.9407	5.875	1.82525	6.5	1.88818	更名改姓	47	23	24	48	24	24	更名改姓	42	28	更	697.279	7	名	1361.14	6	改	1047.42	7	姓	146.341	8
478	工农差别	Differences between workers and peasants	4.37	1.08855	5.32	1.15365	3.76	1.57221	5.96	2.33832	4.85106	0.359875	5.04255	0.464264	3.48	1.55778	6.96	1.33791	3.9434	1.32164	5.56604	1.48725	4.04	1.56738	4.96	2.7	工农差别	100	47	53	50	25	25	工农差别	67	25	工	3526.41	3	农	529.837	6	差	282.423	9	别	1182.98	7
479	工艺品厂	Handicraft factory	5.20455	0.593748	4.13636	1.60799	4.54902	1.36108	6.84314	1.44738	5.13636	0.35125	4.95455	0.72225	4.19231	1.54969	6.61538	1.41639	5.27273	0.767297	3.31818	1.83579	4.92	1.03763	7.08	1.46969	工艺品厂	44	22	22	51	26	25	工艺品厂	73	18	工	3526.41	3	艺	319.666	4	品	1689.38	9	厂	400.914	2
480	工作手册	Manual	5.02326	0.266223	4.09302	1.58586	4.79592	2.12112	7.71429	0.889757	5.05	0.223607	5	0	4.79167	1.8877	7.45833	0.977093	5	0.301511	3.30435	1.84477	4.8	2.36291	7.96	0.734847	工作手册	43	20	23	49	24	25	工作手册	84	19	工	3526.41	3	作	4031.82	7	手	1414.05	4	册	108.513	5
482	公费旅游	Junket	4.25962	2.41353	6.48077	1.58256	5.125	1.9529	6.9375	1.46456	3.39216	2.13615	6.35294	1.58523	5	1.95789	6.8	1.29099	5.09434	2.38798	6.60377	1.58526	5.26087	1.98213	7.08696	1.64905	公费旅游	104	51	53	48	25	23	公费旅游	94	35	公	2641.25	4	费	830.141	9	旅	296.412	10	游	500.564	12
483	公关广告	Pr (public relation) advertising	4.81443	0.650799	4.52577	1.31571	4.57143	1.71998	6.97959	1.28273	5	0.213201	4.93333	0.252262	4.28	1.51438	6.96	1.3687	4.65385	0.837471	4.17308	1.71179	4.875	1.89536	7	1.21584	公关广告	97	45	52	49	25	24	公关广告	77	20	公	2641.25	4	关	2202.44	6	广	903.53	3	告	784.407	7
484	公关先生	Pr man	4.84091	0.568277	4.47727	1.35524	4.55102	1.27576	5.91837	2.06999	4.95455	0.575473	4.86364	1.16682	4.79167	1.02062	6.54167	1.02062	4.72727	0.550482	4.09091	1.4445	4.32	1.46401	5.32	2.6096	公关先生	44	22	22	49	24	25	公关先生	28	21	公	2641.25	4	关	2202.44	6	先	1153.1	6	生	4823.71	5
487	攻心为上	Psychological offense is the best of tactics	5.20833	1.35204	5.54167	1.23699	5.36735	1.98635	6.57143	1.8143	5.48	1.04563	5.76	0.925563	5.44	1.82757	6.04	2.18861	4.91304	1.59297	5.30435	1.49042	5.29167	2.17654	7.125	1.1156	攻心为上	48	25	23	49	25	24	攻心为上	84	18	攻	284.438	7	心	2318.57	4	为	5620.72	4	上	5278.79	3
489	勾股定理	Pythagorean theorem	4.90909	1.0744	4.75	1.33164	4.55102	2.31895	7.34694	1.72664	5	0	4.71429	0.902378	3.6	1.87083	6.6	1.93649	4.82609	1.49703	4.78261	1.65025	5.54167	2.35869	8.125	1.03472	勾股定理	44	21	23	49	25	24	勾股定理	86	31	勾	32.9145	4	股	377.745	8	定	2561.47	8	理	2917.08	11
499	姑妄言之	Just talk for the sake of talking	4.08333	1.25195	5.29167	1.50118	5.06	1.40567	5.06	2.37684	4	1.17954	5.29167	1.19707	4.8	1.38444	4.96	2.24499	4.16667	1.34056	5.29167	1.78104	5.32	1.40594	5.16	2.54427	姑妄言之	48	24	24	50	25	25	姑妄言之	51	23	姑	126.539	8	妄	11.5973	6	言	674.584	7	之	2500.29	2
504	骨软筋酥	Feel very tired	4.54348	1.54498	5.5	1.27802	3.84615	1.37747	6.38462	1.52308	4.28	1.36991	5.16	1.34412	3.96296	1.34397	6.18519	1.03912	4.85714	1.71131	5.90476	1.09109	3.72	1.42945	6.6	1.91485	骨软筋酥	46	25	21	52	27	25	骨软筋酥	13	41	骨	162.914	9	软	172.047	8	筋	33.7059	12	酥	7.58137	12
505	骨头架子	Bone shelf	4.44444	1.17851	4.93333	1.23215	4.33333	1.58897	6.75	1.86228	4.52381	1.16701	5.14286	0.573212	3.84	1.74833	6.56	1.91659	4.375	1.20911	4.75	1.59483	4.86957	1.21746	6.95652	1.82105	骨头架子	45	21	24	48	25	23	骨头架子	64	26	骨	162.914	9	头	1198.71	5	架	149.34	9	子	3348.01	3
507	故土难离	Homeland is hard to leave	4.78261	1.5764	6.08696	1.39565	4.3913	1.96048	7.13043	1.02434	4.81818	1.46828	5.5	1.22474	4.56522	1.92652	7.08696	0.900154	4.75	1.70038	6.625	1.34528	4.21739	2.02162	7.17391	1.15413	故土难离	46	22	24	46	23	23	故土难离	54	32	故	384.416	9	土	568.512	3	难	719.944	10	离	486.518	10
510	顾名思义	As the name suggest	5.20455	0.593748	4.93182	1.08687	5.23913	1.3854	7.06522	1.42052	5.27273	0.631085	5.22727	0.685344	4.59091	1.09801	6.22727	1.26986	5.13636	0.560226	4.63636	1.329	5.83333	1.37261	7.83333	1.09014	顾名思义	44	22	22	46	22	24	顾名思义	817	28	顾	263.48	10	名	1361.14	6	思	1002.68	9	义	1204.83	3
515	关门弟子	Last disciple of a master	5.60417	1.19822	5.33333	1.61553	4.65306	1.75061	6.95918	1.22405	5.64	1.11355	5.56	1.35647	4.125	1.96297	6.91667	0.880547	5.56522	1.30823	5.08696	1.85651	5.16	1.37477	7	1.5	关门弟子	48	25	23	49	24	25	关门弟子	59	19	关	2202.44	6	门	1206.79	3	弟	196.76	7	子	3348.01	3
516	观光电梯	Sightseeing elevator	5.52174	0.960072	4.43478	1.90499	5.08	2.04879	7.18	1.17265	5.27273	0.550482	4.68182	1.2868	4.16	1.8412	6.92	0.953939	5.75	1.18872	4.20833	2.34018	6	1.84842	7.44	1.32539	观光电梯	46	22	24	50	25	25	观光电梯	37	28	观	879.674	6	光	802.844	6	电	2197.76	5	梯	23.8539	11
517	观音大士	Goddess of mercy	5.67391	0.870615	5.13043	1.86915	3.79167	1.62374	5.85417	2.12372	5.65217	0.934622	5.26087	1.65742	4.17391	1.52709	5.86957	1.7915	5.69565	0.822125	5	2.08893	3.44	1.66032	5.84	2.42693	观音大士	46	23	23	48	23	25	观音大士	70	21	观	879.674	6	音	533.815	9	大	6744.01	3	士	368.569	3
518	观音娘娘	Goddess of mercy empress	5.80851	1.035	4.87234	1.92937	3.61702	1.62257	6.95745	1.58742	5.8	1.1547	4.96	1.61967	3.78261	1.59421	6.3913	1.43777	5.81818	0.906924	4.77273	2.26635	3.45833	1.66757	7.5	1.56038	观音娘娘	47	25	22	47	23	24	观音娘娘	28	35	观	879.674	6	音	533.815	9	娘	159.605	10	娘	159.605	10
520	官方消息	Official news	5.19565	0.778019	4.91304	1.44262	3	1.5	7.20408	1.44308	5.41667	0.829702	5.33333	0.701964	2.95833	1.60106	6.91667	1.63964	4.95455	0.652998	4.45455	1.87025	3.04	1.42829	7.48	1.19443	官方消息	46	24	22	49	24	25	官方消息	78	32	官	513.013	8	方	3269.88	4	消	793.819	10	息	562.906	10
522	惯性定律	Inertia law	5.02381	0.154303	3.92857	1.55223	4.45098	2.30923	7.09804	1.53954	5.04762	0.218218	4.61905	1.16087	4.03704	1.97058	6.62963	1.77911	5	0	3.2381	1.6095	4.91667	2.60295	7.625	1.0135	惯性定律	42	21	21	51	27	24	惯性定律	62	36	惯	121.491	11	性	1799.09	8	定	2561.47	8	律	289.573	9
523	光脚丫子	Barefoot	4.98	1.10078	5.15	1.15798	6.34694	1.58838	7.34694	1.21708	4.66667	0.78098	5.08333	0.820828	6	1.53226	6.95833	1.23285	5.26923	1.26979	5.21154	1.40498	6.68	1.6	7.72	1.1	光脚丫子	100	48	52	49	24	25	光脚丫子	34	23	光	802.844	6	脚	176.832	11	丫	6.49949	3	子	3348.01	3
525	广告文化	Advertising culture	4.85714	0.688641	4.73469	1.13565	4.74	1.79353	6.86	1.39985	4.97917	0.437088	4.6875	0.926128	4.92	1.70587	6.56	1.58325	4.74	0.852607	4.78	1.31382	4.56	1.89473	7.16	1.1431	广告文化	98	48	50	50	25	25	广告文化	54	18	广	903.53	3	告	784.407	7	文	2397.82	4	化	2003.07	4
527	归根究底	After all is said and done; in the final analysis	5.26214	0.979808	5.15534	1.28152	5.11321	1.78304	7.07547	1.31338	5.37255	0.87088	5.35294	0.890472	4.17857	1.49204	6.75	1.32288	5.15385	1.07347	4.96154	1.5588	6.16	1.49108	7.44	1.22746	归根究底	103	51	52	53	28	25	归根究底	24	30	归	213.659	5	根	669.907	10	究	441.006	7	底	371.255	8
532	果能如此	If so	5.80851	0.797777	5.46809	1.51587	5.26531	1.31934	6.77551	1.50368	5.83333	0.868115	5.375	1.37722	5.25	1.07339	6.625	1.1726	5.78261	0.735868	5.56522	1.67403	5.28	1.54164	6.92	1.77764	果能如此	47	24	23	49	24	25	果能如此	50	30	果	1235.18	8	能	2883.75	10	如	1955.83	6	此	1536.3	6
534	过桥米线	Rice-flour noodles popular in yunnan province	5.48889	1.12052	4.95556	1.36441	6.07692	2.15885	7.57692	1.14354	5	0.316228	4.95238	0.669043	4.92857	1.76233	7.25	1.23603	5.91667	1.38051	4.95833	1.78104	7.41667	1.79169	7.95833	0.907896	过桥米线	45	21	24	52	28	24	过桥米线	86	30	过	2727.03	6	桥	139.532	10	米	416.617	6	线	755.686	8
535	孩子他妈	The child's mother	5.42222	1.15776	5.13333	1.75292	4.92308	2.08492	7.51923	1.05701	5.63636	1.00216	5.22727	1.65994	4.64286	2.11195	7.42857	0.997351	5.21739	1.27766	5.04348	1.8703	5.25	2.04833	7.625	1.13492	孩子他妈	45	22	23	52	28	24	孩子他妈	74	23	孩	233.24	9	子	3348.01	3	他	4232.98	5	妈	185.19	6
536	海底捞月	Strive for the impossible	5.02222	1.33976	5.71111	1.21771	4.23404	1.73472	6.93617	1.18696	5	1.65145	5.78261	1.34693	4.125	1.91816	6.58333	1.24819	5.04545	0.950051	5.63636	1.09307	4.34783	1.5553	7.30435	1.01957	海底捞月	45	23	22	47	24	23	海底捞月	32	32	海	1315.95	10	底	371.255	8	捞	19.2392	10	月	1839.86	4
539	海外奇谈	A strange story from beyond the seas	5.70833	1.30398	5.45833	1.68798	4.42857	1.24164	6.38776	1.61782	5.45833	1.41357	5.54167	1.444	3.875	1.42379	6.125	1.2959	5.95833	1.16018	5.375	1.92946	4.96	0.734847	6.64	1.86815	海外奇谈	48	24	24	49	24	25	海外奇谈	43	33	海	1315.95	10	外	2025.61	5	奇	294.162	8	谈	527.48	10
542	含笑九泉	Die with smile	4.8125	1.95324	5.83333	1.62864	4.21277	2.07402	7.06383	1.25809	4.91667	2.04124	6.16667	1.49395	4	2.31595	6.91304	1.41142	4.70833	1.89918	5.5	1.71945	4.41667	1.83958	7.20833	1.10253	含笑九泉	48	24	24	47	23	24	含笑九泉	42	28	含	206.609	7	笑	335.449	10	九	331.713	2	泉	74.0657	9
543	含辛茹苦	Bear bitter hardships	4.93878	1.43481	5.71429	1.84842	5.14894	1.94466	7.29787	1.24961	5.2	1.47196	5.92	1.32035	5.30435	2.0766	6.95652	1.02151	4.66667	1.37261	5.5	2.28416	5	1.84155	7.625	1.37722	含辛茹苦	49	25	24	47	23	24	含辛茹苦	484	31	含	206.609	7	辛	28.7993	7	茹	0.438198	9	苦	332.425	8
546	寒来暑往	As summer goes and winter comes	5.15556	0.824499	4.62222	1.70945	3.65306	2.04686	7.26531	1.4109	5.22727	0.751622	5.09091	1.37699	3.04167	1.87615	7.16667	1.20386	5.08696	0.900154	4.17391	1.89862	4.24	2.0672	7.36	1.60416	寒来暑往	45	22	23	49	24	25	寒来暑往	92	39	寒	91.5453	12	来	4682.8	7	暑	13.2473	12	往	546.028	8
547	汉语拼音	Chinese phonetic alphabet	5.19565	0.401085	4.08696	1.65766	5.56863	2.30004	7.80392	1.03961	5.29167	0.464306	4.70833	1.30148	5	2.22711	7.46154	0.989172	5.09091	0.294245	3.40909	1.76363	6.16	2.26716	8.16	0.986577	汉语拼音	46	24	22	51	26	25	汉语拼音	865	32	汉	311.462	5	语	255.897	9	拼	40.8878	9	音	533.815	9
548	汗如雨下	Sweat profusely	4.31818	1.4591	6.15909	1.27486	4.95833	1.92363	7.52083	0.945079	4.3	1.17429	5.8	1.00525	4.83333	1.99274	7.20833	0.883627	4.33333	1.6854	6.45833	1.41357	5.08333	1.88626	7.83333	0.916831	汗如雨下	44	20	24	48	24	24	汗如雨下	76	23	汗	59.7759	6	如	1955.83	6	雨	172.54	8	下	2891.04	3
549	汗水淋漓	Be streaming with sweat	4.38298	1.5116	5.51064	1.30004	5.26531	1.66803	7.55102	0.958758	4.32	1.62583	5.52	1.19443	5.2	1.68325	7.32	1.02956	4.45455	1.405	5.5	1.43925	5.33333	1.6854	7.79167	0.832971	汗水淋漓	47	25	22	49	25	24	汗水淋漓	53	34	汗	59.7759	6	水	1535.76	4	淋	41.0219	11	漓	6.49744	13
551	行车执照	Driving license	5.02128	0.206284	4.55319	1.36482	4.89583	2.00255	7.22917	1.40273	5	0	4.93478	0.442326	4.125	1.91816	7.16667	1.27404	5.04167	0.288675	4.1875	1.79427	5.66667	1.8098	7.29167	1.5458	行车执照	94	46	48	48	24	24	行车执照	61	29	行	3839.45	6	车	1057.01	4	执	149.18	6	照	494.254	13
552	行若无事	Behave as if nothing had happened	4.93396	0.97852	4.75472	1.27101	5.84783	1.4448	6.36957	1.75574	5.16667	0.884884	4.61111	1.08882	5.59091	1.00755	6.04545	1.43019	4.69231	1.02016	4.90385	1.43157	6.08333	1.74248	6.66667	1.99274	行若无事	106	54	52	46	22	24	行若无事	38	26	行	3839.45	6	若	216.964	8	无	1828.92	4	事	2624.46	8
562	何足挂齿	Not worth bothering about	5.31959	0.835992	5.19588	1.14236	5.85417	1.30449	7.20833	1.2021	5.17391	0.901957	5.34783	0.706081	5.65217	0.982052	6.86957	1.09977	5.45098	0.75667	5.05882	1.42002	6.04	1.54056	7.52	1.22882	何足挂齿	97	46	51	48	23	25	何足挂齿	90	31	何	861.736	7	足	543.77	7	挂	91.4446	9	齿	43.2918	8
563	何罪之有	How come the fault of	4.17391	1.28762	5.65217	1.53793	4.62745	1.75455	6.82353	1.57106	4.09091	1.37699	5.86364	1.24577	4.5	1.70294	6.42308	1.57919	4.25	1.22474	5.45833	1.76879	4.76	1.83212	7.24	1.47986	何罪之有	46	22	24	51	26	25	何罪之有	96	28	何	861.736	7	罪	315.23	13	之	2500.29	2	有	8648.03	6
569	黑色火药	Black gunpowder	4.28889	1.23624	5.33333	1.3817	3.88	1.955	6.22	1.90905	4.3913	1.03305	5.17391	0.716822	3.64	1.823	5.88	2.02731	4.18182	1.43548	5.5	1.8452	4.12	2.08806	6.56	1.75784	黑色火药	45	23	22	50	25	25	黑色火药	60	31	黑	323.568	12	色	949.075	6	火	508.645	4	药	370.973	9
570	黑天白日	Night and day	5.06522	0.711873	4.19565	1.57225	3.24	1.68499	6.74	1.83848	5.04545	0.485727	4.72727	1.2792	3.26923	1.82335	7.23077	1.06987	5.08333	0.880547	3.70833	1.68056	3.20833	1.5598	6.20833	2.32153	黑天白日	46	22	24	50	26	24	黑天白日	32	25	黑	323.568	12	天	2247.5	4	白	720.164	5	日	3252.04	4
571	哼哼哈哈	Hum haha	4.55769	1.13057	5.29808	1.06013	5.52174	1.16884	6.84783	1.4448	4.34615	0.967808	5.28846	0.893035	5.5	1.05785	6.59091	1.05375	4.76923	1.24641	5.30769	1.2133	5.54167	1.28466	7.08333	1.71735	哼哼哈哈	104	52	52	46	22	24	哼哼哈哈	68	38	哼	12.5553	10	哼	12.5553	10	哈	171.841	9	哈	171.841	9
573	恒久不变	Constant	5.87755	1.49489	5.10204	1.51719	4.41667	2.30479	7	1.11087	5.8	1.11803	5.44	1.00333	4.6087	2.31083	6.91304	0.900154	5.95833	1.82921	4.75	1.87083	4.24	2.33238	7.08	1.28841	恒久不变	49	25	24	48	23	25	恒久不变	60	24	恒	20.053	9	久	303.16	3	不	9822.27	4	变	1060.95	8
574	恒温动物	Thermostat	5.01042	0.177396	4.45833	1.16905	4.57447	1.63846	6.48936	1.79216	5	0	4.88889	0.382707	3.66667	1.43456	6.29167	1.87615	5.01961	0.244147	4.07843	1.46756	5.52174	1.27456	6.69565	1.71715	恒温动物	96	45	51	47	24	23	恒温动物	60	35	恒	20.053	9	温	303.688	12	动	3207.89	6	物	1894.3	8
579	轰轰隆隆	Rumbling	4.68317	0.989249	5.49505	1.18003	3.95918	1.36869	7.02041	1.28273	5.1	0.952976	5.54	0.734291	3.70833	1.48848	6.70833	1.0417	4.27451	0.850375	5.45098	1.50085	4.2	1.22474	7.32	1.43527	轰轰隆隆	101	50	51	49	24	25	轰轰隆隆	121	38	轰	74.3263	8	轰	74.3263	8	隆	39.5535	11	隆	39.5535	11
581	红红绿绿	Colorful	5.61702	1.32785	5.3617	1.6074	4.81633	1.58999	7.02041	1.45043	5.76	1.56205	5.72	1.4	4.32	1.65126	7.12	0.971253	5.45455	1.01076	4.95455	1.75871	5.33333	1.37261	6.91667	1.83958	红红绿绿	47	25	22	49	25	24	红红绿绿	242	34	红	461.971	6	红	461.971	6	绿	200.236	11	绿	200.236	11
582	红蓝铅笔	Pencil with one end red and the other blue	4.95556	0.298142	4.08889	1.56412	5.84	1.93106	7.4	1.38505	5	0.301511	5.04348	0.366589	4.92	1.57903	7.2	1.25831	4.90909	0.294245	3.09091	1.71573	6.76	1.83212	7.6	1.5	红蓝铅笔	45	23	22	50	25	25	红蓝铅笔	75	39	红	461.971	6	蓝	78.0074	13	铅	18.0811	10	笔	229.554	10
583	宏观世界	Macro world	5.42222	0.865734	4.42222	1.63052	3.34694	1.95311	7.20408	1.44308	5.58333	1.10007	4.79167	1.47381	3.04	1.85921	6.88	1.53623	5.2381	0.436436	4	1.73205	3.66667	2.03591	7.54167	1.28466	宏观世界	45	24	21	49	25	24	宏观世界	99	27	宏	44.4023	7	观	879.674	6	世	1564.19	5	界	1084.58	9
586	后半辈子	The second half of one's lifetime	5	0.83666	4.87129	1.43988	4.83333	2.25344	7.52083	1.18483	5	0.456435	4.83673	0.986301	4.5	2.18692	7.20833	1.10253	5	1.08465	4.90385	1.7741	5.16667	2.31567	7.83333	1.20386	后半辈子	101	49	52	48	24	24	后半辈子	81	26	后	2743.81	6	半	412.055	5	辈	69.2578	12	子	3348.01	3
587	后脑勺子	Back of the head	4.86869	0.52773	4.43434	1.34893	5.55102	1.89364	7.4898	1.20973	4.85417	0.460785	4.8125	0.673392	4.76	1.80924	7.28	1.36991	4.88235	0.588118	4.07843	1.69521	6.375	1.63687	7.70833	0.999094	后脑勺子	99	48	51	49	25	24	后脑勺子	12	22	后	2743.81	6	脑	314.9	10	勺	6.0749	3	子	3348.01	3
589	呼风唤雨	Have the power to control things and accomplish whatever they want	5.70213	1.58683	6.34043	1.20283	4.22449	2.4855	7.08163	1.44102	5.69565	1.42812	6.21739	1.0853	3.16667	1.90347	6.375	1.58286	5.70833	1.75646	6.45833	1.31807	5.24	2.5865	7.76	0.879394	呼风唤雨	47	23	24	49	24	25	呼风唤雨	491	30	呼	243.298	8	风	877.382	4	唤	44.3682	10	雨	172.54	8
590	呼呼啦啦	Shout sounds	4.46667	0.842075	5.26667	1.46784	4.70588	0.985781	5.86275	1.89757	4.78261	0.850482	5.13043	1.05763	4.66667	1.1094	6.37037	1.41824	4.13636	0.710161	5.40909	1.81683	4.75	0.84699	5.29167	2.21613	呼呼啦啦	45	23	22	51	27	24	呼呼啦啦	21	38	呼	243.298	8	呼	243.298	8	啦	39.8801	11	啦	39.8801	11
591	呼伦贝尔	Hulunbeier	5.42857	0.940754	5.02381	1.65997	4.35417	1.40651	7.22917	1.61429	5.14286	0.478091	5	0.447214	3.875	1.6501	6.875	1.59653	5.71429	1.18924	5.04762	2.33401	4.83333	0.916831	7.58333	1.58572	呼伦贝尔	42	21	21	48	24	24	呼伦贝尔	700	23	呼	243.298	8	伦	79.8725	6	贝	140.934	4	尔	257.362	5
593	呼之即来	Come at someone's call	5.0625	1.77939	5.75	1.27996	4.97917	2.24546	7.14583	1.23753	5.84615	1.37673	5.80769	1.20064	5	2.08893	7.08696	1.16436	4.13636	1.78073	5.68182	1.3934	4.96	2.4235	7.2	1.32288	呼之即来	48	26	22	48	23	25	呼之即来	28	24	呼	243.298	8	之	2500.29	2	即	632.955	7	来	4682.8	7
594	忽忽悠悠	Careless and carefree	4.19565	1.00265	5.1087	0.993943	5.25	1.50884	6.52083	1.65014	4.34783	1.0273	5.21739	1.04257	5.20833	1.53167	6.25	1.11316	4.04348	0.975997	5	0.953463	5.29167	1.51741	6.79167	2.04257	忽忽悠悠	46	23	23	48	24	24	忽忽悠悠	29	38	忽	135.535	8	忽	135.535	8	悠	38.1763	11	悠	38.1763	11
596	忽闪忽闪	Flicker	4.86275	0.890424	5.26471	0.88917	4.74	1.29063	6.56	1.6056	4.82353	0.654397	5.39216	0.602609	4.53846	1.24035	6.23077	1.5826	4.90196	1.08176	5.13725	1.0958	4.95833	1.33447	6.91667	1.58572	忽闪忽闪	102	51	51	50	26	24	忽闪忽闪	70	26	忽	135.535	8	闪	85.2078	5	忽	135.535	8	闪	85.2078	5
602	虎踞龙盘	A forbidding strategic point	5.68932	1.40747	5.95146	1.33121	3.72549	1.74446	6.05882	2.0534	6.13208	1.40107	6.18868	1.33094	3.55556	1.82574	6.22222	2.04438	5.22	1.26636	5.7	1.29756	3.91667	1.66594	5.875	2.09165	虎踞龙盘	103	53	50	51	27	24	虎踞龙盘	45	39	虎	76.5574	8	踞	1.93515	15	龙	254.841	5	盘	164.658	11
603	虎口拔牙	To pull a tooth from the tiger’s mouth	4.57547	1.76175	6.51887	1.47507	4.36	2.01788	6.82	1.5345	5.15094	1.85427	6.11321	1.62505	4.84	2.13464	6.36	1.62993	4	1.4676	6.92453	1.19049	3.88	1.81016	7.28	1.30767	虎口拔牙	106	53	53	50	25	25	虎口拔牙	48	23	虎	76.5574	8	口	1079.29	3	拔	79.9317	8	牙	157.828	4
604	虎口余生	Escaped from death	5.93478	1.69184	6.78261	1.67216	3.34694	1.67768	6.91837	1.48376	6.17391	1.85011	6.52174	1.97414	3.04167	1.45898	6.75	0.944089	5.69565	1.52061	7.04348	1.29609	3.64	1.84572	7.08	1.86905	虎口余生	46	23	23	49	24	25	虎口余生	33	23	虎	76.5574	8	口	1079.29	3	余	326.57	7	生	4823.71	5
607	虎头虎脑	Looking dignified and strong	5.68224	1.46402	5.60748	1.50319	5.26	1.52275	6.94	1.54405	5.92453	1.238	5.90566	1.25979	4.76	1.56205	7.04	0.978093	5.44444	1.63299	5.31481	1.66908	5.76	1.33167	6.84	1.97231	虎头虎脑	107	53	54	50	25	25	虎头虎脑	72	31	虎	76.5574	8	头	1198.71	5	虎	76.5574	8	脑	314.9	10
610	互为依存	Interdependence	5.97826	1.02174	5.36957	1.73024	5.38776	1.8576	6.83673	1.23063	6.08696	1.16436	5.3913	1.72519	5.58333	1.83958	6.70833	1.26763	5.86957	0.868873	5.34783	1.77377	5.2	1.89297	6.96	1.20692	互为依存	46	23	23	49	24	25	互为依存	58	22	互	324.339	4	为	5620.72	4	依	385.284	8	存	596.102	6
614	花花草草	Flowers and grass	5.6729	0.887818	4.60748	1.65265	5.14	1.94842	7.42	1.27919	5.56604	0.888158	5.07547	1.43914	4.5	1.67929	7.11538	1.3062	5.77778	0.883105	4.14815	1.73104	5.83333	2.01444	7.75	1.18872	花花草草	107	53	54	50	26	24	花花草草	84	32	花	625.91	7	花	625.91	7	草	267.558	9	草	267.558	9
616	花甲老人	Old people	5.12766	0.849988	4.38298	1.81244	4.26	1.92524	7.74	0.985818	5.16667	0.963087	5.08333	1.05981	4	2.19848	8	0.866025	5.08696	0.733178	3.65217	2.14495	4.52	1.61038	7.48	1.04563	花甲老人	47	24	23	50	25	25	花甲老人	63	20	花	625.91	7	甲	131.148	5	老	1102.08	6	人	10357.8	2
619	哗哗啦啦	Clatter	4.79808	0.989065	5.20192	1.0463	5.17021	1.04921	6.31915	1.68247	4.73077	0.888166	5.21154	0.536384	5	1	6.3913	1.19617	4.86538	1.08517	5.19231	1.38675	5.33333	1.09014	6.25	2.06945	哗哗啦啦	104	52	52	47	23	24	哗哗啦啦	50	40	哗	12.9507	9	哗	12.9507	9	啦	39.8801	11	啦	39.8801	11
628	欢喜冤家	Quarrelsome lovers	5.82178	1.25217	5.78218	1.23777	5.26	1.32187	6.9	1.41782	5.28571	0.978945	5.42857	1.08012	5.36	1.31909	6.72	1.06145	6.32692	1.27911	6.11538	1.29333	5.16	1.34412	7.08	1.70587	欢喜冤家	101	49	52	50	25	25	欢喜冤家	71	38	欢	332.901	6	喜	331.813	12	冤	21.369	10	家	3873.64	10
631	缓急轻重	In order of importance and urgency	5.30097	0.83824	5.00971	1.29475	5.79592	1.80254	7.16327	1.02768	5.39216	0.665686	5.11765	1.08898	5.83333	1.83366	7.125	0.797414	5.21154	0.976921	4.90385	1.47209	5.76	1.80924	7.2	1.22474	缓急轻重	103	51	52	49	24	25	缓急轻重	23	39	缓	104.685	12	急	256.014	9	轻	439.1	9	重	1984.12	9
632	换位思考	Transpositional consideration	5.95556	1.0435	4.55556	1.35773	6.1875	1.92029	7.72917	0.892989	5.82609	1.23038	4.86957	1.39167	5.6087	2.18963	7.34783	0.71406	6.09091	0.811177	4.22727	1.26986	6.72	1.48661	8.08	0.909212	换位思考	45	23	22	48	23	25	换位思考	82	32	换	269.673	10	位	1320.42	7	思	1002.68	9	考	527.554	6
635	黄花闺女	Virgin	5.82979	1.2036	5.04255	1.81728	5.21739	1.53352	7.06522	1.23652	5.625	0.923721	4.875	1.454	4.59091	1.05375	6.63636	1.1358	6.04348	1.4295	5.21739	2.1523	5.79167	1.69344	7.45833	1.21509	黄花闺女	47	24	23	46	22	24	黄花闺女	64	30	黄	372.666	11	花	625.91	7	闺	2.97281	9	女	1009.76	3
640	挥师北上	Command an army to march north	5.89583	0.92804	5.95833	1.33621	4.91489	2.50069	6.89362	1.37104	5.96154	1.07632	5.84615	1.34736	4.47826	2.71142	7	1.16775	5.81818	0.732664	6.09091	1.34196	5.33333	2.25864	6.79167	1.5598	挥师北上	48	26	22	47	23	24	挥师北上	97	23	挥	296.666	9	师	662.888	6	北	1945.54	5	上	5278.79	3
643	回过味来	Finally realize	5.46512	0.959882	5.51163	1.09918	5.5	1.50177	6.9375	1.35907	5.61905	1.16087	5.61905	1.11697	5.21739	1.44463	6.6087	1.37309	5.31818	0.716231	5.40909	1.09801	5.76	1.53514	7.24	1.3	回过味来	43	21	22	48	23	25	回过味来	47	27	回	1114.06	6	过	2727.03	6	味	273.699	8	来	4682.8	7
646	汇编语言	Assembly language	5.04348	0.556038	3.91304	1.77421	5.68	1.73134	6.9	1.34392	5.08333	0.717282	4.375	1.63687	5.12	1.83303	6.84	1.06771	5	0.308607	3.40909	1.81683	6.24	1.45144	6.96	1.59374	汇编语言	46	24	22	50	25	25	汇编语言	105	33	汇	169.035	5	编	478.627	12	语	255.897	9	言	674.584	7
652	婚丧嫁娶	Marriage and funeral	4.52174	1.04858	4.8913	1.28631	4.4375	2.12289	6.97917	1.55042	5	0.301511	5.04348	0.705708	4	2.06419	7	1.14208	4.04348	1.29609	4.73913	1.68462	4.875	2.13282	6.95833	1.89918	婚丧嫁娶	46	23	23	48	24	24	婚丧嫁娶	238	43	婚	109.9	11	丧	34.0481	8	嫁	34.9796	13	娶	12.9677	11
657	货柜码头	Container terminal	5	0	4.53488	1.24114	4.57447	1.55682	6.23404	1.64466	5	0	4.59091	1.2596	4.26087	1.28691	5.86957	1.32474	5	0	4.47619	1.24976	4.875	1.75233	6.58333	1.86307	货柜码头	43	22	21	47	23	24	货柜码头	69	29	货	358.809	8	柜	21.3207	8	码	107.675	8	头	1198.71	5
662	祸福无门	If either comes	4.56522	1.18607	5.21739	1.44396	3.51064	1.42756	5.89362	1.90233	4.43478	1.27301	5.26087	1.09617	3.73913	1.60163	5.69565	1.55021	4.69565	1.10514	5.17391	1.74908	3.29167	1.23285	6.08333	2.20507	祸福无门	46	23	23	47	23	24	祸福无门	28	31	祸	38.92	11	福	314.423	13	无	1828.92	4	门	1206.79	3
667	鸡毛掸子	Feather duster	4.73913	0.534781	4.65217	1.52341	5.79592	2.16967	7.40816	1.20621	5	0	4.54545	1.22386	4.44	1.50222	6.96	1.20692	4.5	0.65938	4.75	1.77544	7.20833	1.84106	7.875	1.03472	鸡毛掸子	46	22	24	49	25	24	鸡毛掸子	61	25	鸡	85.1377	7	毛	380.029	4	掸	0.830807	11	子	3348.01	3
671	鸡犬相闻	Live in a close neighbourhood that could hear the sound of chicken and dog	5.10476	1.25517	5.06667	1.36767	4.58333	1.35007	6.64583	1.43645	4.88235	1.07046	5.01961	1.00976	4.24	1.16476	6.72	1.42945	5.31481	1.38488	5.11111	1.64451	4.95652	1.46095	6.56522	1.47174	鸡犬相闻	105	51	54	48	25	23	鸡犬相闻	43	29	鸡	85.1377	7	犬	15.4233	4	相	1565.14	9	闻	580.753	9
672	鸡鸭鱼肉	Chicken and duck fish	5.70192	1.10497	5.33654	1.47214	6.125	2.21816	7.75	1.04168	5.34615	0.947331	5.25	1.02661	5.08696	2.10871	7.3913	1.03305	6.05769	1.1447	5.42308	1.81871	7.08	1.89121	8.08	0.953939	鸡鸭鱼肉	104	52	52	48	23	25	鸡鸭鱼肉	230	31	鸡	85.1377	7	鸭	22.508	10	鱼	158.194	8	肉	163.063	6
674	积年累月	For months and years	5.15385	0.856378	4.82692	1.31786	4.44681	1.69152	7.38298	1.01195	5.33333	0.711805	4.96078	1.14823	4.04545	2.01133	7.40909	0.959121	4.98113	0.950517	4.69811	1.46215	4.8	1.29099	7.36	1.07548	积年累月	104	51	53	47	22	25	积年累月	19	31	积	521.111	10	年	5151.12	6	累	115.726	11	月	1839.86	4
675	基本药物	Essential medicines	5	0.213201	3.95556	1.5805	4.71429	1.76777	6.61224	1.82364	5	0	4.5	1.14434	4.2	1.77951	6.6	1.80278	5	0.301511	3.43478	1.77933	5.25	1.62186	6.625	1.88386	基本药物	45	22	23	49	25	24	基本药物	58	33	基	638.396	11	本	2895.78	5	药	370.973	9	物	1894.3	8
679	极目四望	Gaze far into the distance	5.33333	1.22474	5.24444	1.04785	6.09804	1.81389	6.68627	1.66722	5.33333	0.57735	5.19048	1.12335	5.57143	1.98939	6.60714	1.16553	5.33333	1.60615	5.29167	0.999094	6.73913	1.35571	6.78261	2.1523	极目四望	45	21	24	51	28	23	极目四望	52	28	极	626.876	7	目	1386.17	5	四	747.386	5	望	623.873	11
684	疾风骤雨	Howling winds and driving rains	4.02128	1.53919	6.31915	1.43112	3	1.5	7.28571	1.09924	4.13043	1.74002	6.13043	1.7915	3.12	1.81016	7.12	1.23558	3.91667	1.34864	6.5	0.978019	2.875	1.1156	7.45833	0.931533	疾风骤雨	47	23	24	49	25	24	疾风骤雨	57	39	疾	64.7254	10	风	877.382	4	骤	32.2028	17	雨	172.54	8
687	计算机室	Computer room	5.02439	0.156174	4.21951	1.57341	5.20833	1.30398	7.3125	1.27423	5	0	5	0	4.78261	0.951388	6.78261	1.34693	5.04762	0.218218	3.47619	1.93956	5.6	1.47196	7.8	1	计算机室	41	20	21	48	23	25	计算机室	86	33	计	1239.78	4	算	583.645	14	机	2206.73	6	室	317.443	9
688	纪念邮票	Commemorative stamp	5.58696	0.858321	4.8913	1.43338	5.22449	1.87378	7.16327	1.61177	5.375	0.575779	5.16667	1.23945	4.75	1.25974	7	1.35133	5.81818	1.05272	4.59091	1.59341	5.68	2.24944	7.32	1.8421	纪念邮票	46	24	22	49	24	25	纪念邮票	643	32	纪	370.976	6	念	431.946	8	邮	157.406	7	票	277.388	11
689	纪实小说	Documentary novel	5.26667	0.653661	4.57778	1.6024	4.92	1.71238	6.84	1.58256	5.36364	0.726731	5.27273	1.07711	4.56	1.75784	6.92	1.03763	5.17391	0.576208	3.91304	1.75585	5.28	1.6207	6.76	2.00582	纪实小说	45	22	23	50	25	25	纪实小说	83	26	纪	370.976	6	实	2543.98	8	小	2135.97	3	说	2761.37	9
701	尖声细气	High-pitched voice	4.02885	1.08347	5.24038	1.28089	5.28571	1.67083	6.93878	1.67591	4.36	0.984782	5.08	0.899887	5.32	1.65126	6.68	1.54704	3.72222	1.08882	5.38889	1.54696	5.25	1.72576	7.20833	1.7932	尖声细气	104	50	54	49	25	24	尖声细气	13	25	尖	69.8096	6	声	768.616	7	细	404.615	8	气	1139.89	4
703	艰苦卓绝	Extremely hard and bitter	5.94444	1.65896	6.125	1.43812	5.23333	2.06659	7.35556	0.951771	6.37838	1.47771	6.16216	1.53522	5.08889	2.04297	7.13333	0.967659	5.48571	1.7257	6.08571	1.33778	5.37778	2.10291	7.57778	0.891599	艰苦卓绝	144	74	70	90	45	45	艰苦卓绝	950	33	艰	53.9766	8	苦	332.425	8	卓	13.1929	8	绝	360.979	9
705	煎炒烹炸	Fry and cook	5.8	0.94388	5.37778	1.55635	5.94	2.05446	7.62	1.00793	5.47619	0.872872	5.14286	1.27615	5.44	2.14243	7.52	0.962635	6.08333	0.928611	5.58333	1.76725	6.44	1.87261	7.72	1.06145	煎炒烹炸	45	21	24	50	25	25	煎炒烹炸	62	41	煎	11.2986	13	炒	31.2141	8	烹	12.4478	11	炸	115.912	9
709	简化汉字	Simplified chinese characters	5.27551	0.654573	4.91837	1.32908	5.2549	2.26135	7.47059	1.28613	5.33333	0.753244	5.29167	0.92157	4.30769	2.07402	7.30769	1.01071	5.22	0.545482	4.56	1.55393	6.24	2.04695	7.64	1.52425	简化汉字	98	48	50	51	26	25	简化汉字	100	28	简	283.047	13	化	2003.07	4	汉	311.462	5	字	580.813	6
710	简简单单	Simple	5.30952	0.64347	4.59524	1.63885	5.93478	1.56918	7.65217	0.947919	5.15789	0.374634	4.84211	0.50146	5.36364	1.59001	7.18182	0.906924	5.43478	0.787752	4.3913	2.16877	6.45833	1.38247	8.08333	0.775532	简简单单	42	19	23	46	22	24	简简单单	471	42	简	283.047	13	简	283.047	13	单	747.548	8	单	747.548	8
713	见机而行	Take the opportunity to act	5.87755	1.16606	5.40816	1.54	6.31915	1.57572	7.31915	1.00231	6.04	1.20692	5.12	1.78699	6.30435	1.32921	7.04348	0.975997	5.70833	1.12208	5.70833	1.19707	6.33333	1.8098	7.58333	0.974308	见机而行	49	25	24	47	23	24	见机而行	12	22	见	1255.38	4	机	2206.73	6	而	2283.95	6	行	3839.45	6
714	见机而作	Take advantage of an opportunity that comes one's way	5.0396	1.08555	5.33663	0.982621	6.26531	1.31934	6.7551	1.70209	5.18367	0.882078	5.18367	0.781917	6.07692	1.41204	6.84615	1.4613	4.90385	1.2408	5.48077	1.12877	6.47826	1.20112	6.65217	1.96813	见机而作	101	49	52	49	26	23	见机而作	82	23	见	1255.38	4	机	2206.73	6	而	2283.95	6	作	4031.82	7
718	江山易改	Leopard can not change	4.5619	1.23976	5.53333	1.11861	4.02128	1.75064	7.25532	1.09282	4.90385	1.2408	5.59615	0.822708	3.96	1.79072	6.88	1.01325	4.22642	1.15428	5.4717	1.35311	4.09091	1.74326	7.68182	1.04135	江山易改	105	52	53	47	25	22	江山易改	92	24	江	603.051	6	山	1013.65	3	易	574.346	8	改	1047.42	7
721	将功折罪	Make up for one's error	5.76471	1.07332	5.56863	1.19826	5.13725	1.9801	7.23529	1.20976	5.65306	1.07143	5.57143	1.25831	5.07692	1.95802	7.26923	0.874423	5.86792	1.07485	5.56604	1.15208	5.2	2.04124	7.2	1.5	将功折罪	102	49	53	51	26	25	将功折罪	86	34	将	1120.39	9	功	611.551	5	折	161.256	7	罪	315.23	13
722	讲经说法	Expound the texts of buddhism	5.20755	0.922904	4.65094	1.28761	4.65217	1.62231	6.45652	1.60148	5.51852	0.946508	4.98148	1.03688	4.65217	1.74795	6.56522	1.12112	4.88462	0.783503	4.30769	1.43539	4.65217	1.5258	6.34783	1.99109	讲经说法	106	54	52	46	23	23	讲经说法	54	31	讲	334.863	6	经	3714.01	8	说	2761.37	9	法	3154.31	8
726	交叉科学	Interdisciplinary science	5	0.369274	4.35556	1.43266	4.72	1.71476	6.12	2.00652	5	0.426401	4.82609	0.834058	4.12	1.48099	5.56	2.2561	5	0.308607	3.86364	1.75378	5.32	1.74929	6.68	1.57374	交叉科学	45	23	22	50	25	25	交叉科学	65	26	交	1106.25	6	叉	26.4253	3	科	1642.42	9	学	4035.57	8
728	骄兵必败	The self-conceited troops are destined to fail	4.34091	1.42964	5.79545	1.42371	4.76471	1.79542	7.17647	1.47927	4.25	1.77334	5.55	1.5035	4.81481	1.98139	6.77778	1.52753	4.41667	1.10007	6	1.35133	4.70833	1.60106	7.625	1.31256	骄兵必败	44	20	24	51	27	24	骄兵必败	46	29	骄	13.6746	9	兵	551.831	7	必	824.242	5	败	206.25	8
730	骄阳似火	The scorching sun is like a fire.	4.34783	1.87637	6	1.4453	3	1.6413	7.72	1.1073	4.45455	2.04071	6.04545	1.3965	2.88	1.71561	7.68	1.14455	4.25	1.75078	5.95833	1.51741	3.12	1.58955	7.76	1.09087	骄阳似火	46	22	24	50	25	25	骄阳似火	293	25	骄	13.6746	9	阳	397.791	6	似	351.708	6	火	508.645	4
731	脚不沾地	Do not touch the ground	4.70213	1.44335	5.14894	1.69371	5.82	1.95553	6.8	1.57791	4.84	1.65025	5.52	1.5843	5.56	2.14243	7.12	1.16619	4.54545	1.18431	4.72727	1.7507	6.08	1.75404	6.48	1.8735	脚不沾地	47	25	22	50	25	25	脚不沾地	46	29	脚	176.832	11	不	9822.27	4	沾	15.1491	8	地	4442.5	6
733	教学环节	Teaching steps	5.2381	1.00752	5.02381	1.17884	4.04167	1.78598	7.41667	1.02798	5.25	0.55012	5.2	0.523148	4.04167	1.57367	7	0.932505	5.22727	1.30683	4.86364	1.55212	4.04167	2.01039	7.83333	0.963087	教学环节	42	20	22	48	24	24	教学环节	53	32	教	1594.79	11	学	4035.57	8	环	545.927	8	节	631.945	5
734	教学相长	Teaching benefits teachers as well as students	5.84783	1.1149	5	1.53478	5.4898	1.73352	6.22449	1.71106	5.95455	1.17422	5.59091	1.09801	5.16667	1.9708	6.20833	1.66757	5.75	1.07339	4.45833	1.69344	5.8	1.44338	6.24	1.78606	教学相长	46	22	24	49	24	25	教学相长	92	32	教	1594.79	11	学	4035.57	8	相	1565.14	9	长	2117.13	4
736	接力赛跑	Relay race	5.74468	1.13191	5.89362	1.57748	5.375	1.97457	7.58333	1.02798	5.86957	1.09977	5.78261	1.50625	5	1.95789	7.36	0.994987	5.625	1.1726	6	1.66812	5.78261	1.95301	7.82609	1.02922	接力赛跑	47	23	24	48	25	23	接力赛跑	52	39	接	999.812	11	力	2285.95	2	赛	555.065	14	跑	137.974	12
737	接受美学	Reception aesthetics	5.68889	0.949216	5.15556	1.74454	5.18367	1.6792	5.93878	1.89746	5.91304	1.12464	5.56522	1.59049	5.08333	1.76725	6.45833	1.06237	5.45455	0.670982	4.72727	1.83048	5.28	1.6207	5.44	2.36432	接受美学	45	23	22	49	24	25	接受美学	56	36	接	999.812	11	受	972.326	8	美	1436.88	9	学	4035.57	8
744	借水行舟	Sail a boat by water	5.53061	1.04287	4.89796	1.34234	5.29167	1.98889	6.72917	1.44015	5.72	0.936305	5.44	0.960902	4.95652	2.24577	6.73913	0.963771	5.33333	1.12932	4.33333	1.46456	5.6	1.70783	6.72	1.79165	借水行舟	49	25	24	48	23	25	借水行舟	24	26	借	171.773	10	水	1535.76	4	行	3839.45	6	舟	26.6777	6
750	仅供参考	For reference only	4.725	0.678894	5.025	0.65974	4.61702	1.37609	7.2766	1.15537	5	0	4.89474	0.567131	4.86364	0.83355	6.63636	1.1358	4.47619	0.872872	5.14286	0.727029	4.4	1.70783	7.84	0.85049	仅供参考	40	19	21	47	22	25	仅供参考	217	26	仅	457.495	4	供	477.702	8	参	727.667	8	考	527.554	6
751	紧赶慢赶	Rush to catch up	4.67327	1.02087	5.58416	0.886198	5.35417	2.0472	7.45833	1.051	5.07843	1.03621	5.27451	0.801958	6.08333	1.99819	7.41667	0.928611	4.26	0.828325	5.9	0.863075	4.625	1.86063	7.5	1.17954	紧赶慢赶	101	51	50	48	24	24	紧赶慢赶	62	44	紧	354.228	10	赶	147.179	10	慢	149.532	14	赶	147.179	10
753	紧锣密鼓	Wildly beating gongs and drums	4.6875	1.55955	6	1.51587	5.03922	1.82166	7.35294	1.01634	4.91667	1.5299	5.79167	1.50302	4.81481	1.71053	7.18519	0.921414	4.45833	1.58743	6.20833	1.53167	5.29167	1.94443	7.54167	1.10253	紧锣密鼓	48	24	24	51	27	24	紧锣密鼓	1841	47	紧	354.228	10	锣	11.4986	13	密	368.076	11	鼓	168.246	13
755	尽欢而散	Split up after having fun	5.48936	2.02025	5.78723	1.45865	5.56	1.69224	7	1.30931	5.34783	1.87347	5.69565	1.60779	5.38462	1.67516	6.80769	0.938903	5.625	2.18319	5.875	1.32902	5.75	1.72576	7.20833	1.61458	尽欢而散	47	23	24	50	26	24	尽欢而散	102	30	尽	407.054	6	欢	332.901	6	而	2283.95	6	散	236.394	12
757	尽其所有	Offer all sb. owns	5.7234	1.48474	5.95745	1.75645	5.42308	1.98372	7.21154	1.09072	5.69565	1.22232	5.52174	1.41001	5.51852	2.10074	7.14815	1.06351	5.75	1.72576	6.375	1.97402	5.32	1.8868	7.28	1.13725	尽其所有	47	23	24	52	27	25	尽其所有	31	28	尽	407.054	6	其	1873.8	8	所	2259.17	8	有	8648.03	6
760	惊奇不已	Amazed	5.80435	1.3763	6.04348	1.6991	4.91667	1.67374	6.9375	1.26165	5.86364	1.55212	5.81818	1.84226	4.58333	1.86307	6.29167	1.16018	5.75	1.22474	6.25	1.56733	5.25	1.42188	7.58333	1.01795	惊奇不已	46	22	24	48	24	24	惊奇不已	98	26	惊	217.576	11	奇	294.162	8	不	9822.27	4	已	1213.41	3
764	惊险小说	Thriller novels	5.41667	1.48515	6.20833	1.28756	4.2	1.70234	7.12	1.04276	5.24	1.33167	5.92	1.22202	4.23077	1.65669	6.76923	1.06987	5.6087	1.64425	6.52174	1.30974	4.16667	1.78561	7.5	0.884652	惊险小说	48	25	23	50	26	24	惊险小说	89	32	惊	217.576	11	险	391.019	9	小	2135.97	3	说	2761.37	9
769	精卫填海	A symbol of dogged determination	5.97917	1.50869	6.16667	1.27719	4.51064	1.82819	6.55319	1.72965	5.91667	1.34864	6.16667	1.16718	4.41667	1.97631	5.66667	1.60615	6.04167	1.68056	6.16667	1.40393	4.6087	1.69864	7.47826	1.344	精卫填海	48	24	24	47	24	23	精卫填海	78	40	精	824.006	14	卫	203.718	3	填	41.4437	13	海	1315.95	10
770	镜花水月	A mirage, insubstantial objects	5.61111	1.72303	5.14815	1.7011	4.11321	1.52745	6.84906	1.40598	5.90741	1.40442	5.25926	1.68439	3.96429	1.55116	6.46429	1.37389	5.31481	1.96021	5.03704	1.72619	4.28	1.51438	7.28	1.33915	镜花水月	108	54	54	53	28	25	镜花水月	67	31	镜	85.3343	16	花	625.91	7	水	1535.76	4	月	1839.86	4
777	酒足饭饱	Have dined and wined to satiety	5.87234	1.48349	5.42553	1.74137	5.95918	1.75546	7.61224	0.953422	5.52174	1.47308	5.47826	1.72862	5.8	1.73205	7.4	0.912871	6.20833	1.444	5.375	1.78916	6.125	1.80127	7.83333	0.963087	酒足饭饱	47	23	24	49	25	24	酒足饭饱	286	32	酒	253.867	10	足	543.77	7	饭	186.681	7	饱	47.0539	8
778	酒醉饭饱	Eat and drink to the limit of one's capacity	5.15217	1.96602	5.71739	1.5153	5.73469	1.69282	6.93878	1.34487	5.18182	2.01509	5.36364	1.61968	5.58333	1.88626	7.125	1.07592	5.125	1.96297	6.04167	1.36666	5.88	1.50886	6.76	1.56205	酒醉饭饱	46	22	24	49	24	25	酒醉饭饱	68	40	酒	253.867	10	醉	45.823	15	饭	186.681	7	饱	47.0539	8
780	旧金山湾	San francisco bay	5.06977	0.551852	4.37209	1.57394	4.56	1.24802	5.36	1.83792	4.90476	0.436436	4.80952	1.20909	4.28	1.4	5.44	1.55671	5.22727	0.61193	3.95455	1.78558	4.84	1.02794	5.28	2.11187	旧金山湾	43	21	22	50	25	25	旧金山湾	58	28	旧	200.293	5	金	1155.2	8	山	1013.65	3	湾	161.779	12
783	居安思危	Be prepared for danger in times of peace	5.83333	1.57552	5.20833	1.44338	5.76	1.99551	7.4	1.08797	6	1.80278	5.24	1.66533	5.36	1.823	7.2	0.957427	5.65217	1.30065	5.17391	1.19286	6.16	2.11503	7.6	1.19024	居安思危	48	25	23	50	25	25	居安思危	594	29	居	428.171	8	安	1119.42	6	思	1002.68	9	危	215.107	6
788	聚沙成塔	Many littles make a mickle	5.84783	1.4137	5.84783	1.24664	5.76596	1.65782	6.53191	1.67917	5.73913	1.57299	5.78261	1.1264	5	1.62369	5.91304	1.56417	5.95652	1.26053	5.91304	1.37883	6.5	1.35133	7.125	1.59653	聚沙成塔	46	23	23	47	23	24	聚沙成塔	59	39	聚	156.036	14	沙	250.466	7	成	3751.08	6	塔	121.923	12
789	绝非偶然	It is no accident	4.84091	0.805307	5.54545	1.43793	4.56522	1.52974	6.86957	1.25802	4.77273	0.869144	5.68182	1.12911	4.52174	1.59173	6.43478	1.16096	4.90909	0.75018	5.40909	1.70878	4.6087	1.49967	7.30435	1.22232	绝非偶然	44	22	22	46	23	23	绝非偶然	102	37	决	1087.06	6	非	678.212	8	偶	39.5998	11	然	1095.5	12
790	绝无此事	No matter	4.53883	0.876405	5.3835	1.18447	5.10204	1.61045	7.08163	1.4554	4.75	0.763763	5.34615	1.00751	5.08333	1.71735	6.91667	1.34864	4.32353	0.937142	5.42157	1.35045	5.12	1.53623	7.24	1.56205	绝无此事	103	52	51	49	24	25	绝无此事	32	24	决	1087.06	6	无	1828.92	4	此	1536.3	6	事	2624.46	8
791	绝无此意	Have absolutely no such intentions	4.68085	1.16295	5.55319	1.44175	5.18367	1.61598	7	1.41421	4.86957	0.814881	5.13043	0.694416	5.32	1.34536	6.76	1.53514	4.5	1.41421	5.95833	1.82921	5.04167	1.87615	7.25	1.25974	绝无此意	47	23	24	49	25	24	绝无此意	14	32	绝	360.979	9	无	1828.92	4	此	1536.3	6	意	1962.75	13
792	军令如山	Milirary orders are important	5.43689	1.15189	6	1.28338	2.625	2.13008	7.29167	1.27092	5.82692	1.23226	6.09615	1.40391	3	2.41523	7	1.47196	5.03922	0.915659	5.90196	1.15334	2.21739	1.73091	7.6087	0.940944	军令如山	103	52	51	48	25	23	军令如山	68	20	军	1900.38	6	令	489.012	5	如	1955.83	6	山	1013.65	3
795	开门办学	Carry out open-door education	5.72917	0.868836	4.54167	2.01017	5.04	2.09917	6.76	1.66059	5.83333	0.868115	4.95833	1.65448	4.52	2.0025	7.04	0.978093	5.625	0.875388	4.125	2.27104	5.56	2.10317	6.48	2.12368	开门办学	48	24	24	50	25	25	开门办学	100	19	开	2553.84	4	门	1206.79	3	办	876.048	4	学	4035.57	8
797	慷慨悲歌	Chant in a heroic but mournful tone	4.68868	1.86376	6.53774	1.27372	4.73469	1.74135	6.71429	1.79118	5.37037	2.09488	6.59259	1.28149	4.5	1.79371	6.29167	2.01039	3.98077	1.2601	6.48077	1.27557	4.96	1.69509	7.12	1.48099	慷慨悲歌	106	54	52	49	24	25	慷慨悲歌	172	52	慷	7.41399	14	慨	19.721	12	悲	112.186	12	歌	295.903	14
799	慷慨就义	Go to one's death like a hero	5.17925	2.25852	7.17925	1.23286	4.97872	2.5833	7.3617	1.22342	5.22642	2.62855	7.39623	1.23007	4.78261	2.77909	7.26087	1.32175	5.13208	1.84013	6.96226	1.20834	5.16667	2.42571	7.45833	1.14129	慷慨就义	106	53	53	47	23	24	慷慨就义	91	41	慷	7.41399	14	慨	19.721	12	就	2333.69	12	义	1204.83	3
800	烤羊肉串	Shish kebab; barbecue	5.78641	1.21793	5.53398	1.42674	6.02128	2.22133	7.76596	0.937452	5.21569	0.878948	5.19608	1.05867	4.65217	1.96813	7.21739	0.795243	6.34615	1.25064	5.86538	1.65718	7.33333	1.57885	8.29167	0.750604	烤羊肉串	103	51	52	47	23	24	烤羊肉串	157	29	烤	18.8765	10	羊	86.095	6	肉	163.063	6	串	34.3339	7
801	靠水吃水	Living from what the land and sea can give	5.21739	0.786357	4.5	1.58815	3.73469	1.83457	6.85714	1.59426	5.21739	0.599736	5	1.12815	4	2.3094	7.16	1.17898	5.21739	0.951388	4	1.83402	3.45833	1.14129	6.54167	1.91059	靠水吃水	46	23	23	49	25	24	靠水吃水	68	29	靠	197.331	15	水	1535.76	4	吃	273.555	6	水	1535.76	4
802	科学史家	History of science	5.2093	0.674648	4.67442	1.50746	4.61224	1.60489	6.57143	1.5411	5.15	0.67082	5	1.21395	4.625	1.52693	6.33333	1.23945	5.26087	0.6887	4.3913	1.69864	4.6	1.70783	6.8	1.77951	科学史家	43	20	23	49	24	25	科学史家	84	32	科	1642.42	9	学	4035.57	8	史	658.455	5	家	3873.64	10
804	刻舟求剑	Take measures without attention to the changes in circumstances	4.88889	1.36885	4.91111	1.56412	4.83673	1.55921	7.02041	1.52055	4.91304	0.99604	4.95652	1.4295	4.84	1.46287	6.36	1.60416	4.86364	1.69861	4.86364	1.72642	4.83333	1.6854	7.70833	1.08264	刻舟求剑	45	23	22	49	25	24	刻舟求剑	73	30	刻	323.226	8	舟	26.6777	6	求	922	7	剑	67.2818	9
807	课外辅导	Instruction after class	4.76699	0.842544	4.93204	1.22284	4.44681	1.93153	7.25532	1.13191	5.08	0.444467	4.92	1.08496	3.625	1.09594	7.04167	0.954585	4.4717	1.01154	4.9434	1.35043	5.30435	2.24489	7.47826	1.27456	课外辅导	103	50	53	47	24	23	课外辅导	64	32	课	143.724	10	外	2025.61	5	辅	25.3413	11	导	526.374	6
808	课外作业	Homework	4.4898	0.922177	5.03061	1.17055	4.57447	2.13404	7.70213	1.0197	4.97872	0.328988	4.82979	0.66982	4.41667	1.69184	7.41667	0.974308	4.03922	1.05756	5.21569	1.47396	4.73913	2.54447	8	1	课外作业	98	47	51	47	24	23	课外作业	84	27	课	143.724	10	外	2025.61	5	作	4031.82	7	业	1866.64	5
811	口传心授	Oral teaching that inspires true understanding within	5.79167	1.051	5.125	1.68378	5.03846	1.99962	7.21154	1.21003	5.96	1.05987	5.52	1.50333	4.59259	2.0987	6.96296	1.01835	5.6087	1.03305	4.69565	1.79481	5.52	1.80555	7.48	1.35769	口传心授	48	25	23	52	27	25	口传心授	44	24	口	1079.29	3	传	864.783	6	心	2318.57	4	授	257.959	11
812	口耳相传	Teach orally	5.23762	0.81423	4.88119	1.12505	4.83673	1.78357	7.04082	1.22405	5.28571	0.645497	4.91837	0.731344	4.79167	1.84106	6.91667	1.05981	5.19231	0.95051	4.84615	1.40566	4.88	1.76352	7.16	1.37477	口耳相传	101	49	52	49	24	25	口耳相传	86	24	口	1079.29	3	耳	161.511	6	相	1565.14	9	传	864.783	6
815	口说无凭	Words alone are no proof	4.15217	0.988093	5.56522	1.51514	4.94	1.671	7.04	1.08722	4.34783	0.831685	5.34783	1.43364	5.04	1.56738	6.84	1.24766	3.95652	1.10693	5.78261	1.59421	4.84	1.79536	7.24	0.879394	口说无凭	46	23	23	50	25	25	口说无凭	98	24	口	1079.29	3	说	2761.37	9	无	1828.92	4	凭	70.3308	8
823	苦思苦想	Think hard	4.48889	1.1798	5.26667	1.40454	5.81633	1.62882	7.02041	1.39179	4.56522	1.40861	5.04348	1.60902	6	1.41421	6.91667	0.928611	4.40909	0.908116	5.5	1.14434	5.64	1.823	7.12	1.73973	苦思苦想	45	23	22	49	24	25	苦思苦想	33	38	苦	332.425	8	思	1002.68	9	苦	332.425	8	想	1405.79	13
824	夸父逐日	A braggadocio, miscalculating his strength, conceived the vain ambition of overtaking the fleeting rays of the sun	5.35556	1.1512	5.71111	1.44005	4.7	1.64441	6.64	1.97701	5.19048	0.813575	5.42857	0.810643	4.44	1.55671	5.92	2.03961	5.5	1.38313	5.95833	1.80529	4.96	1.7195	7.36	1.65529	夸父逐日	45	21	24	50	25	25	夸父逐日	33	24	夸	36.2242	6	父	161.781	4	逐	115.973	10	日	3252.04	4
831	昆仑山口	Kunlun mountain pass	4.97826	0.829702	4.21739	1.42849	3.62	1.60217	6.04	2.36436	4.95833	1.12208	4.58333	0.974308	3.48	1.73494	6.04	2.3	5	0.308607	3.81818	1.7358	3.76	1.47986	6.04	2.47454	昆仑山口	46	24	22	50	25	25	昆仑山口	57	18	昆	23.3198	8	仑	19.3991	4	山	1013.65	3	口	1079.29	3
833	拉扯成人	Raised	5.3125	1.1328	5.72917	1.6978	4.76	1.8578	7.32	0.998775	5.72	1.30767	5.72	1.54164	5.38462	1.6267	7.19231	0.980581	4.86957	0.694416	5.73913	1.88818	4.08333	1.88626	7.45833	1.02062	拉扯成人	48	25	23	50	26	24	拉扯成人	24	23	拉	699.256	8	扯	18.8929	7	成	3751.08	6	人	10357.8	2
834	拉家带口	Have family burden	4.07447	1.22465	5	1.4295	4.32653	1.80725	7.20408	1.2413	4	1.31876	4.70833	1.60106	4.25	1.64845	7.125	1.03472	4.15217	1.14251	5.30435	1.18455	4.4	1.97906	7.28	1.42945	拉家带口	47	24	23	49	24	25	拉家带口	45	30	拉	699.256	8	家	3873.64	10	带	651.825	9	口	1079.29	3
837	蓝领工人	Blue-collar	5.13333	0.587754	4.8	1.09959	4.5102	1.37117	6.81633	1.57683	5.18182	0.394771	4.86364	1.12527	4.08	1.63095	6.88	1.23558	5.08696	0.733178	4.73913	1.09617	4.95833	0.858673	6.75	1.89393	蓝领工人	45	22	23	49	25	24	蓝领工人	77	29	蓝	78.0074	13	领	976.096	11	工	3526.41	3	人	10357.8	2
838	狼吞虎咽	Gobble	4.23913	1.19601	5.97826	1.2559	6	1.84506	7.60417	0.961815	4.17391	1.19286	5.6087	1.49967	5.75	1.84744	7.41667	1.01795	4.30435	1.22232	6.34783	0.831685	6.25	1.84744	7.79167	0.883627	狼吞虎咽	46	23	23	48	24	24	狼吞虎咽	601	34	狼	27.4724	10	吞	39.3194	7	虎	76.5574	8	咽	25.2855	9
841	浪迹江湖	Wander about	5.29524	1.36525	5.8	1.07775	5.9375	2.00432	7.22917	1.20706	4.64151	1.0395	5.45283	0.931625	5	1.95604	6.79167	1.17877	5.96154	1.34254	6.15385	1.1094	6.875	1.59653	7.66667	1.09014	浪迹江湖	105	53	52	48	24	24	浪迹江湖	93	37	浪	128.776	10	迹	63.9517	9	江	603.051	6	湖	219.583	12
842	劳务出口	Export of labor services	4.80952	0.551632	4.88095	1.01699	4.41667	1.51353	6.0625	1.91751	5	0.324443	4.85	1.08942	4.04348	1.63702	6.30435	1.32921	4.63636	0.657952	4.90909	0.971454	4.76	1.33167	5.84	2.33952	劳务出口	42	20	22	48	23	25	劳务出口	89	20	劳	310.929	7	务	803.775	5	出	4757.26	5	口	1079.29	3
845	老花眼镜	Old eyeglasses	5	0.632456	4.46341	1.51818	5.20833	1.98889	7.33333	1.40415	4.95	0.223607	5.1	0.552506	4.45833	1.64129	7.375	1.13492	5.04762	0.86465	3.85714	1.87845	5.95833	2.05319	7.29167	1.65448	老花眼镜	41	20	21	48	24	24	老花眼镜	106	40	老	1102.08	6	花	625.91	7	眼	606.508	11	镜	85.3343	16
846	老老少少	Old and young	5.1087	0.640426	4.86957	1.20386	4.67391	1.47655	7.21739	1.31509	5.22727	0.751622	5.18182	0.852803	3.95652	1.36443	7.17391	0.936734	5	0.510754	4.58333	1.41165	5.3913	1.23359	7.26087	1.62976	老老少少	46	22	24	46	23	23	老老少少	301	20	老	1102.08	6	老	1102.08	6	少	1064	4	少	1064	4
850	老少皆知	All the young and old know	5.60417	0.916505	5	1.41421	5.21277	1.79294	7.48936	1.01879	5.48	0.918332	5.28	1.06145	4.875	1.70198	7.29167	0.907896	5.73913	0.915393	4.69565	1.69048	5.56522	1.85438	7.69565	1.10514	老少皆知	48	25	23	47	24	23	老少皆知	18	27	老	1102.08	6	少	1064	4	皆	55.939	9	知	1298.23	8
851	老少爷们	Elders and brethren	5.18182	0.540143	4.36364	1.54153	4.77083	1.38748	7.47917	1.14835	5.20833	0.658005	5	0.932505	4.64	1.55134	7.16	1.28062	5.15	0.366348	3.6	1.78885	4.91304	1.20276	7.82609	0.886883	老少爷们	44	24	20	48	25	23	老少爷们	106	21	老	1102.08	6	少	1064	4	爷	131.162	6	们	4548.35	5
852	老实巴交	Honest	5.35417	1.2289	4.72917	1.4253	6.16327	1.62464	7.44898	1.00127	5.8	0.763763	4.96	1.30639	5.75	1.62186	7.41667	1.01795	4.86957	1.45553	4.47826	1.53355	6.56	1.55671	7.48	1.00499	老实巴交	48	25	23	49	24	25	老实巴交	228	24	老	1102.08	6	实	2543.98	8	巴	449.006	4	交	1106.25	6
862	冷暖自知	Know by oneself whether it is cold or warm	5.19149	1.07619	4.97872	1.15136	5.79167	1.91254	7.39583	1.04657	5.65217	0.572768	4.95652	1.18622	5.70833	1.70623	7.125	1.03472	4.75	1.25974	5	1.14208	5.875	2.13282	7.66667	1.00722	冷暖自知	47	23	24	48	24	24	冷暖自知	72	34	冷	210.839	7	暖	69.0162	13	自	3316.74	6	知	1298.23	8
870	里里外外	Inside and outside	5.04082	0.428817	4.68367	1.11778	5	1.45686	7	1.55183	5.1087	0.378785	4.93478	0.573573	4.56	1.66032	7.16	1.21381	4.98077	0.464014	4.46154	1.40673	5.44	1.08321	6.84	1.8412	里里外外	98	46	52	50	25	25	里里外外	624	24	里	2015.7	7	里	2015.7	7	外	2025.61	5	外	2025.61	5
871	理当如此	That's the right thing to do.	5.46078	0.991764	5.15686	1.28005	5.45833	1.50118	7.04167	1.09074	5.64	0.984782	5.12	1.27199	5.17391	1.37021	6.78261	0.998022	5.28846	0.976921	5.19231	1.29915	5.72	1.59478	7.28	1.13725	理当如此	102	50	52	48	23	25	理当如此	42	29	理	2917.08	11	当	1983.76	6	如	1955.83	6	此	1536.3	6
874	历尽艰辛	Go through hard work	5.22727	1.62629	6.02273	1.67733	4.9375	1.98297	7.22917	0.92804	5.19048	1.63153	5.61905	1.39557	4.625	2.01759	6.91667	0.717282	5.26087	1.65742	6.3913	1.85225	5.25	1.9393	7.54167	1.02062	历尽艰辛	44	21	23	48	24	24	历尽艰辛	466	25	历	349.628	4	尽	407.054	6	艰	53.9766	8	辛	28.7993	7
875	历历可数	Countable	5.12019	0.863205	4.77885	1.25378	5.36735	1.67946	6.89796	1.35777	5.03846	0.928028	5.01923	0.896406	5.2	1.82574	6.88	1.50886	5.20192	0.793723	4.53846	1.50113	5.54167	1.53167	6.91667	1.21285	历历可数	104	52	52	49	25	24	历历可数	53	26	历	349.628	4	历	349.628	4	可	3245.08	5	数	1155.01	13
877	历史学界	Historians	5.13265	0.468332	4.5102	1.31796	4.34	1.27151	6.56	1.78611	5.14583	0.58308	4.8125	1.04487	4.48	1.15902	6.6	1.65831	5.12	0.328261	4.22	1.4886	4.2	1.38444	6.52	1.93907	历史学界	98	48	50	50	25	25	历史学界	61	26	历	349.628	4	史	658.455	5	学	4035.57	8	界	1084.58	9
878	立体几何	Stereoscopic geometry	5.09302	0.426165	4.2093	1.69815	4.89796	2.10401	7.65306	1.36246	5	0	5	0	4.2	2.06155	6.96	1.45717	5.18182	0.58849	3.45455	2.13201	5.625	1.92946	8.375	0.76967	立体几何	43	21	22	49	25	24	立体几何	63	21	立	1499.57	5	体	2253.44	7	几	707.904	2	何	861.736	7
879	利害攸关	Have a stake in	4.7234	1.15537	5.85106	1.48878	4.25532	1.59439	6.70213	1.50239	4.69565	0.97397	5.30435	0.822125	4.34783	1.69515	6.08696	1.59297	4.75	1.32698	6.375	1.78916	4.16667	1.52277	7.29167	1.16018	利害攸关	47	23	24	47	23	24	利害攸关	49	30	利	1925.1	7	害	379.521	10	攸	1.11455	7	关	2202.44	6
882	连连称是	Again and again agree	5.43478	1.24101	5.63043	1.28856	5.58333	1.68641	6.77083	1.49096	5.91304	0.99604	5.69565	1.29456	5.95652	1.22394	6.43478	1.27301	4.95652	1.29609	5.56522	1.30823	5.24	1.98494	7.08	1.63095	连连称是	46	23	23	48	23	25	连连称是	40	33	连	505.817	7	连	505.817	7	称	627.03	10	是	9027.33	9
883	连年不断	Years after years	4.76596	1.27199	5.40426	1.61056	4.10417	1.80118	6.9375	1.19228	4.91304	0.514609	5.34783	0.572768	3.73913	1.76371	6.56522	1.03687	4.625	1.71471	5.45833	2.2063	4.44	1.80462	7.28	1.24231	连年不断	47	23	24	48	23	25	连年不断	80	28	连	505.817	7	年	5151.12	6	不	9822.27	4	断	527.891	11
884	怜香惜玉	Have a compassion for womanhood	5.88542	1.13569	5.16667	1.52054	5.91667	1.4267	7.22917	1.20706	5.65385	1.23101	5.42308	1.36156	6.25	1.03209	6.95833	1.16018	6.15909	0.968386	4.86364	1.67034	5.58333	1.69184	7.5	1.21584	怜香惜玉	48	26	22	48	24	24	怜香惜玉	107	33	怜	27.8984	8	香	347.807	9	惜	31.2393	11	玉	146.743	5
886	良药苦口	Good medicine tastes bitter	5.44681	1.24775	5.51064	1.53045	4.50943	1.85662	7.50943	0.953186	5.65217	1.40158	5.3913	1.61637	4.10714	1.83261	7.35714	0.95119	5.25	1.07339	5.625	1.46888	4.96	1.81384	7.68	0.945163	良药苦口	47	23	24	53	28	25	良药苦口	60	27	良	292.367	7	药	370.973	9	苦	332.425	8	口	1079.29	3
887	粮食局长	Food director	5	0	4.16279	1.57254	4.08511	1.52984	6.3617	1.93846	5	0	4.77273	0.81251	4	1.41421	6.58333	1.50121	5	0	3.52381	1.91361	4.17391	1.6693	6.13043	2.32192	粮食局长	43	22	21	47	24	23	粮食局长	48	33	粮	145.187	13	食	423.122	9	局	650.051	7	长	2117.13	4
893	量力而为	Act according to one's capability	5.46809	1.01833	4.82979	1.46435	6.24	1.81333	7.68	0.767716	5.68	1.02956	5.08	1.35154	6.24	1.71464	7.48	0.714143	5.22727	0.972567	4.54545	1.56532	6.24	1.94251	7.88	0.781025	量力而为	47	25	22	50	25	25	量力而为	46	24	量	1367.86	12	力	2285.95	2	而	2283.95	6	为	5620.72	4
894	量子物理	Quantum physics	4.97619	0.64347	4.64286	1.55895	3.97917	1.87355	6.0625	2.02544	5	0	4.94737	0.229416	4.125	1.80127	5.41667	1.88626	4.95652	0.877924	4.3913	2.08325	3.83333	1.9708	6.70833	1.98865	量子物理	42	19	23	48	24	24	量子物理	83	34	量	1367.86	12	子	3348.01	3	物	1894.3	8	理	2917.08	11
898	烈焰腾腾	Blaze	4.82979	1.61944	6.51064	1.4577	3.9375	2.04634	6.54167	1.42856	5.04348	1.91829	6	1.67874	3.16667	1.85722	6.375	1.0135	4.625	1.27901	7	1.02151	4.70833	1.96666	6.70833	1.75646	烈焰腾腾	47	23	24	48	24	24	烈焰腾腾	20	48	烈	255.312	10	焰	9.8023	12	腾	67.1784	13	腾	67.1784	13
900	临阵磨枪	Sharpen one's spear only before going into battle	4.69388	1.60992	5.77551	1.34265	5.26	1.80487	7.3	1.19949	4.52	1.55778	5.64	0.95219	5.4	1.65831	6.88	1.33292	4.875	1.67624	5.91667	1.66594	5.12	1.96469	7.72	0.890693	临阵磨枪	49	25	24	50	25	25	临阵磨枪	67	39	临	259.976	9	阵	176.741	6	磨	85.8521	16	枪	137.611	8
902	淋淋漓漓	Dripping	4.71111	1.35885	5.31111	1.25811	4.83333	1.56196	6.35417	1.60438	4.13043	1.45553	5.34783	1.30065	4.95833	1.45898	6.5	1.14208	5.31818	0.945484	5.27273	1.24142	4.70833	1.68056	6.20833	1.97768	淋淋漓漓	45	23	22	48	24	24	淋淋漓漓	37	48	淋	41.0219	11	淋	41.0219	11	漓	6.49744	13	漓	6.49744	13
903	伶牙俐齿	Have the gift of the gab	4.44681	1.99792	6.25532	1.34274	5.46	1.97133	7.44	0.907115	3.56522	1.59049	6.21739	1.53613	4.92	1.95619	7.08	0.702377	5.29167	2.01039	6.29167	1.16018	6	1.87083	7.8	0.957427	伶牙俐齿	47	23	24	50	25	25	伶牙俐齿	181	28	伶	3.21436	7	牙	157.828	4	俐	1.59017	9	齿	43.2918	8
906	绫罗绸缎	Silk and satin	5.91489	1.24813	5.3617	1.53829	5.31373	1.64305	7.19608	0.980196	5.56522	0.992063	4.91304	1.50493	4.65385	1.62339	7.07692	1.12865	6.25	1.39096	5.79167	1.47381	6	1.38444	7.32	0.802081	绫罗绸缎	47	23	24	51	26	25	绫罗绸缎	171	42	绫	0.542985	11	罗	478.906	8	绸	23.7505	11	缎	3.15788	12
907	零零落落	Fragmented	4.1087	0.948174	4.95652	1.33261	4.86	1.457	6.86	1.30946	4.13043	1.14035	4.6087	1.49967	4.6	1.29099	6.4	1.47196	4.08696	0.733178	5.30435	1.06322	5.12	1.58955	7.32	0.945163	零零落落	46	23	23	50	25	25	零零落落	150	50	零	106.149	13	零	106.149	13	落	422.942	12	落	422.942	12
908	零零散散	Scattered	4.36957	0.826201	4.78261	1.2277	5.14	1.39985	7.2	1.26168	4.54545	0.738549	4.95455	0.652998	4.72	1.45831	7	0.866025	4.20833	0.883627	4.625	1.58286	5.56	1.22746	7.4	1.55456	零零散散	46	22	24	50	25	25	零零散散	93	50	零	106.149	13	零	106.149	13	散	236.394	12	散	236.394	12
909	零零碎碎	Fragmentary	4.2766	0.971376	5.04255	1.31806	5.28571	1.25831	7.02041	1.1635	4.26087	0.810016	5.21739	0.735868	4.8	1.1547	6.84	1.02794	4.29167	1.12208	4.875	1.70198	5.79167	1.17877	7.20833	1.28466	零零碎碎	47	23	24	49	25	24	零零碎碎	300	52	零	106.149	13	零	106.149	13	碎	66.4394	13	碎	66.4394	13
910	另请高明	Find someone better	4.04444	1.26051	5.8	1.15994	5.29167	1.90138	7.16667	0.952786	4.29167	1.26763	5.875	1.42379	5.66667	1.92617	7.04167	0.954585	3.7619	1.22085	5.71429	0.783764	4.91667	1.83958	7.29167	0.954585	另请高明	45	24	21	48	24	24	另请高明	58	33	另	288.366	5	请	424.632	10	高	2199.88	10	明	1782.89	8
913	流传已久	For a long time	5.51064	1.10084	5.34043	1.47849	4.02041	1.65189	7.08163	1.20479	5.3913	1.03305	5.52174	1.12288	4.08	1.75404	6.84	1.43411	5.625	1.1726	5.16667	1.76109	3.95833	1.57367	7.33333	0.868115	流传已久	47	23	24	49	25	24	流传已久	59	22	流	948.45	10	传	864.783	6	已	1213.41	3	久	303.16	3
918	流水落花	Like fallen flowers carried away by the flowing water	4.65217	1.26872	5.56522	1.31068	4.54167	1.79785	6.9375	1.47902	4.82609	1.40299	5.21739	1.59421	4.08	1.49778	6.44	1.60935	4.47826	1.12288	5.91304	0.848155	5.04348	1.98811	7.47826	1.12288	流水落花	46	23	23	48	25	23	流水落花	37	33	流	948.45	10	水	1535.76	4	落	422.942	12	花	625.91	7
919	六根清净	The six roots of sensations are pure and clean -- a buddhist term	5.79167	1.21967	4.66667	1.74226	5.05882	1.89116	6.58824	1.72252	5.54167	0.779028	5.375	0.824226	4.66667	1.79743	6.14815	1.81243	6.04167	1.51741	3.95833	2.11576	5.5	1.93368	7.08333	1.50121	六根清净	48	24	24	51	27	24	六根清净	25	33	六	288.051	4	根	669.907	10	清	730.146	11	净	102.779	8
923	龙争虎斗	Fierce struggle	4.6087	1.87946	6.54348	1.3777	4.34615	1.76995	7.11538	1.3813	4.31818	2.12438	6.5	1.37148	4.07407	1.54237	7.03704	1.31505	4.875	1.62354	6.58333	1.41165	4.64	1.97653	7.2	1.47196	龙争虎斗	46	22	24	52	27	25	龙争虎斗	167	23	龙	254.841	5	争	891.82	6	虎	76.5574	8	斗	441.536	4
924	陆陆续续	One after another	5.06667	0.617914	4.24444	1.40058	5	1.249	7.11765	1.22714	5.17391	0.491026	4.65217	0.982052	4.76923	1.42289	6.65385	1.16421	4.95455	0.72225	3.81818	1.65145	5.24	1.0116	7.6	1.11803	陆陆续续	45	23	22	51	26	25	陆陆续续	489	36	陆	226.563	7	陆	226.563	7	续	506.028	11	续	506.028	11
929	罗马数字	Roman numerals	5	0	4	1.5667	5.39623	2.0413	7.18868	1.56962	5	0	5	0	4.55172	1.61657	6.89655	1.56627	5	0	3.04348	1.7183	6.41667	2.06243	7.54167	1.53167	罗马数字	45	22	23	53	29	24	罗马数字	92	30	罗	478.906	8	马	1026.99	3	数	1155.01	13	字	580.813	6
930	洛阳纸贵	Good writings make people copy them	4.7619	1.221	5.34286	1.307	4.06	1.43442	5.9	1.95093	4.62264	1.13046	5.30189	0.952424	4.24	1.53514	5.48	1.82848	4.90385	1.30248	5.38462	1.59845	3.88	1.33292	6.32	2.01494	洛阳纸贵	105	53	52	50	25	25	洛阳纸贵	95	31	洛	31.1059	9	阳	397.791	6	纸	197.062	7	贵	251.942	9
933	落日余辉	The afterglow of the sunset	5.81905	1.36425	5.09524	1.71825	3.72	1.81872	7.5	1.34392	5.47059	1.22234	5.31373	1.449	3.12	1.76352	7.4	1.47196	6.14815	1.41964	4.88889	1.92958	4.32	1.70098	7.6	1.22474	落日余辉	105	51	54	50	25	25	落日余辉	48	35	落	422.942	12	日	3252.04	4	余	326.57	7	辉	31.4584	12
935	吕氏春秋	Lv's spring and autumn period	5.11111	0.745356	5.37778	1.05073	4.4375	1.2867	6.16667	1.94972	5	0.436436	5	0.816497	4.375	1.43898	6	1.588	5.21739	0.951388	5.73913	1.13688	4.5	1.14208	6.33333	2.27781	吕氏春秋	45	22	23	48	24	24	吕氏春秋	718	28	吕	1.53301	6	氏	82.2703	4	春	316.163	9	秋	142.529	9
937	旅途劳顿	On the journey	4.23913	1.0151	4.8913	1.28631	4.38776	1.84635	7.2449	0.924901	4.45455	1.05683	5.45455	0.911685	4.625	1.88386	6.95833	0.858673	4.04167	0.954585	4.375	1.37722	4.16	1.81842	7.52	0.918332	旅途劳顿	46	22	24	49	24	25	旅途劳顿	104	37	旅	296.412	10	途	85.4078	10	劳	310.929	7	顿	180.294	10
939	绿色汽车	Environmentally friendly car	5.93878	1.21464	5.02041	1.88735	5.08163	2.04976	7.04082	1.3988	5.8	1.19024	4.72	1.83757	4.12	1.71561	6.96	1.3687	6.08333	1.24819	5.33333	1.92617	6.08333	1.90917	7.125	1.454	绿色汽车	49	25	24	49	25	24	绿色汽车	75	28	绿	200.236	11	色	949.075	6	汽	253.453	7	车	1057.01	4
941	略加思索	At a single jet	5.3617	0.818948	5.14894	1.19744	6.2449	1.40728	7.38776	1.11461	5.26087	0.915393	5.34783	1.0273	5.95833	1.26763	6.91667	0.974308	5.45833	0.72106	4.95833	1.33447	6.52	1.50333	7.84	1.06771	略加思索	47	23	24	49	24	25	略加思索	79	35	略	304.193	11	加	1892.76	5	思	1002.68	9	索	179.603	10
942	略有所闻	Heard about	5.34043	0.814985	4.48936	1.48723	5.45833	1.32019	7.125	1.16006	5.4	1	4.92	1.32035	5.07692	1.19743	6.88462	0.951921	5.27273	0.550482	4	1.54303	5.90909	1.34196	7.40909	1.33306	略有所闻	47	25	22	48	26	22	略有所闻	44	34	略	304.193	11	有	8648.03	6	所	2259.17	8	闻	580.753	9
944	买办资本	Comprador capital	4.68085	0.980381	4.55319	1.61257	4.2449	1.73842	5.40816	2.27228	4.73913	0.963771	5	1	3.75	1.56733	5.75	1.82376	4.625	1.0135	4.125	1.96297	4.72	1.79165	5.08	2.62869	买办资本	47	23	24	49	24	25	买办资本	71	25	买	302.483	6	办	876.048	4	资	1124.96	10	本	2895.78	5
946	满脸堆笑	Full of smiles	4.32381	1.66118	5.87619	1.15771	5.61538	1.75067	7.26923	1.13958	4.96364	1.76345	6	1.26198	5.44444	1.84669	7.18519	0.921414	3.62	1.21033	5.74	1.02639	5.8	1.65831	7.36	1.35031	满脸堆笑	105	55	50	52	27	25	满脸堆笑	253	45	满	524.571	13	脸	196.834	11	堆	55.6294	11	笑	335.449	10
949	满满登登	Be filled with	5.87755	1.18379	5.22449	1.57143	5.05769	1.30479	6.17308	1.97753	5.96	1.20692	5.6	1.29099	4.81481	1.2721	6.85185	1.23113	5.79167	1.17877	4.83333	1.76109	5.32	1.31403	5.44	2.36432	满满登登	49	25	24	52	27	25	满满登登	23	50	满	524.571	13	满	524.571	13	登	225.452	12	登	225.452	12
951	漫天大雪	Snow in the sky	5.42553	1.62514	6	1.38313	3.20408	1.77927	7.5102	1.12031	5.56	1.52971	6.36	1.03602	3	1.95789	7.48	1.15902	5.27273	1.7507	5.59091	1.62302	3.41667	1.58572	7.54167	1.10253	漫天大雪	47	25	22	49	25	24	漫天大雪	74	32	漫	120.904	14	天	2247.5	4	大	6744.01	3	雪	141.883	11
954	忙中偷闲	Be busy with leisure	5.63265	1.43895	5.34694	1.42231	6.3125	1.75228	7.39583	1.00508	5.84	1.21381	5.48	1.1225	5.75	1.87083	7.16667	0.963087	5.41667	1.63964	5.20833	1.69344	6.875	1.454	7.625	1.0135	忙中偷闲	49	25	24	48	24	24	忙中偷闲	40	28	忙	140.396	6	中	7314.64	4	偷	71.1255	11	闲	86.2529	7
955	盲人摸象	On the basis of one-sided viewpoint	4.58696	0.883832	5.17391	1.30477	4.46154	1.89387	6.94231	1.63795	4.77273	0.751622	5	1.19523	4.53571	1.64389	6.85714	1.32537	4.41667	0.974308	5.33333	1.40393	4.375	2.18319	7.04167	1.96666	盲人摸象	46	22	24	52	28	24	盲人摸象	55	34	盲	20.3333	8	人	10357.8	2	摸	54.3121	13	象	747.887	11
956	茫茫无际	Boundless	5.06383	1.22304	5.23404	1.52105	3.3	1.7291	6.96	1.4563	5.21739	1.34693	5.56522	1.40861	3.76	1.87705	6.64	1.49666	4.91667	1.10007	4.91667	1.58572	2.84	1.46287	7.28	1.36991	茫茫无际	47	23	24	50	25	25	茫茫无际	61	29	茫	15.8833	9	茫	15.8833	9	无	1828.92	4	际	572.793	7
960	毛头小子	Younger	4.6087	1.37402	4.91304	1.53226	5.06383	1.4507	6.89362	1.25515	4.6087	1.4058	4.52174	1.67521	4.79167	1.35066	6.54167	1.17877	4.6087	1.37309	5.30435	1.29456	5.34783	1.5258	7.26087	1.25109	毛头小子	46	23	23	47	24	23	毛头小子	75	15	毛	380.029	4	头	1198.71	5	小	2135.97	3	子	3348.01	3
962	貌似强大	Look quite strong	4.07843	1.00184	5.34314	1.22268	5.08163	1.718	6.81633	1.60304	3.96	1.15987	5.5	0.994885	5.125	1.62354	6.58333	1.5299	4.19231	0.81742	5.19231	1.40082	5.04	1.83666	7.04	1.67033	貌似强大	102	50	52	49	24	25	貌似强大	50	35	貌	39.9053	14	似	351.708	6	强	972.351	12	大	6744.01	3
970	眉毛胡子	Eyebrow beard	4.79545	0.509425	4.06818	1.63391	5.5	1.91485	7.5	1.12894	4.73913	0.540824	4.69565	0.97397	4.67857	1.61138	7.07143	1.01575	4.85714	0.478091	3.38095	1.93588	6.45833	1.81729	8	1.06322	眉毛胡子	44	23	21	52	28	24	眉毛胡子	40	25	眉	26.0245	9	毛	380.029	4	胡	166.667	9	子	3348.01	3
971	眉目传情	Send speechless messages	5.87234	1.45389	5.74468	1.56689	6.13725	1.5623	7.13725	1.41449	5.82609	1.43502	5	1.67874	5.69231	1.66779	6.80769	1.72091	5.91667	1.50121	6.45833	1.06237	6.6	1.32288	7.48	0.918332	眉目传情	47	23	24	51	26	25	眉目传情	94	31	眉	26.0245	9	目	1386.17	5	传	864.783	6	情	1729.84	11
975	美其名曰	The beautiful name says	4.75728	1.15016	5.25243	1.1692	4.98039	1.37826	6.96078	1.18255	4.52941	1.08357	5.05882	1.10294	4.92308	0.89098	6.69231	1.04954	4.98077	1.17974	5.44231	1.21128	5.04	1.7673	7.24	1.26754	美其名曰	103	51	52	51	26	25	美其名曰	362	27	美	1436.88	9	其	1873.8	8	名	1361.14	6	曰	71.5923	4
979	蒙蒙胧胧	Obscure	4.6087	1.18281	3.93478	1.55495	4.5102	1.29297	7.06122	1.19736	4.2	1.19024	4.48	1.19443	4.72	1.42945	6.64	1.35031	5.09524	0.995227	3.28571	1.70713	4.29167	1.12208	7.5	0.834058	蒙蒙胧胧	46	25	21	49	25	24	蒙蒙胧胧	6	44	蒙	184.874	13	蒙	184.874	13	胧	5.02159	9	胧	5.02159	9
980	蒙蒙细雨	Drizzle	5.91489	1.15777	4.06383	1.85805	3.98	1.65973	7.06	1.50387	5.625	1.1726	4.41667	1.81579	3.44	1.63503	6.84	1.72434	6.21739	1.0853	3.69565	1.86924	4.52	1.5308	7.28	1.24231	蒙蒙细雨	47	24	23	50	25	25	蒙蒙细雨	181	42	蒙	184.874	13	蒙	184.874	13	细	404.615	8	雨	172.54	8
982	猛虎下山	A fierce tiger sprang down from the top of the mountain	5.06522	1.9253	6.54348	1.51594	3.41176	1.74558	6.76471	1.59484	4.95455	2.05814	6.54545	1.50324	3.19231	1.76679	7.03846	1.14824	5.16667	1.83366	6.54167	1.5598	3.64	1.72916	6.48	1.93907	猛虎下山	46	22	24	51	26	25	猛虎下山	99	25	猛	79.8181	11	虎	76.5574	8	下	2891.04	3	山	1013.65	3
987	迷迷蒙蒙	Obsessed with obscuring	4.17021	1.04921	4.74468	1.48131	4.86275	1.4835	6.98039	1.10436	4.25	1.11316	5.125	0.946963	5.11111	1.42325	6.74074	1.22765	4.08696	0.99604	4.34783	1.8243	4.58333	1.5299	7.25	0.896854	迷迷蒙蒙	47	24	23	51	27	24	迷迷蒙蒙	110	44	迷	150.526	9	迷	150.526	9	蒙	184.874	13	蒙	184.874	13
989	密密层层	Packed closely layer upon layer	4.61364	0.894841	5.04545	1.18035	4.72549	1.09688	6.37255	1.91792	4.90909	0.610159	5.22727	0.428932	4.74074	1.34715	6.51852	1.28214	4.31818	1.04135	4.86364	1.61232	4.70833	0.750604	6.20833	2.46681	密密层层	44	22	22	51	27	24	密密层层	244	36	密	368.076	11	密	368.076	11	层	357.942	7	层	357.942	7
990	密密麻麻	Dense	4.04255	1.36664	5.44681	1.45675	4.85106	1.36698	7.06383	1.1685	4.95652	0.638055	4.73913	1.32175	5.18182	0.852803	6.68182	1.04135	3.16667	1.30773	6.125	1.2619	4.56	1.66032	7.4	1.19024	密密麻麻	47	23	24	47	22	25	密密麻麻	1336	44	密	368.076	11	密	368.076	11	麻	128.812	11	麻	128.812	11
991	密密实实	Dense and tight	5.08333	1.26883	5.02083	1.71959	4.93878	1.21464	7.04082	1.15396	5.5	1.02151	4.95833	1.70623	4.625	1.0135	6.95833	0.690253	4.66667	1.37261	5.08333	1.76725	5.24	1.33167	7.12	1.48099	密密实实	48	24	24	49	24	25	密密实实	42	38	密	368.076	11	密	368.076	11	实	2543.98	8	实	2543.98	8
993	绵绵无尽	Endless	5.2	0.828775	4.75	1.18386	4.38776	1.42619	6.69388	1.43184	5.12245	0.832483	4.87755	0.6962	4.72	1.42945	6.2	1.58114	5.27451	0.826521	4.62745	1.50945	4.04167	1.36666	7.20833	1.06237	绵绵无尽	100	49	51	49	25	24	绵绵无尽	31	32	绵	16.6896	11	绵	16.6896	11	无	1828.92	4	尽	407.054	6
994	绵延起伏	Undulating	5.95652	1.09456	5.06522	1.48177	3.82979	1.50823	7.12766	1.13477	5.91304	1.12464	5.47826	1.03877	3.45833	1.47381	7.08333	0.880547	6	1.08711	4.65217	1.74795	4.21739	1.47576	7.17391	1.37021	绵延起伏	46	23	23	47	24	23	绵延起伏	83	33	绵	16.6896	11	延	74.5665	6	起	2047.96	10	伏	75.6933	6
999	面无惧色	No fear	5.84091	1.44581	5.27273	1.99259	6.07692	1.88748	7.01923	1.11127	6.19048	1.36452	5.71429	1.58565	5.2963	2.01561	6.85185	1.26198	5.52174	1.47308	4.86957	2.26243	6.92	1.32035	7.2	0.912871	面无惧色	44	21	23	52	27	25	面无惧色	57	30	面	2739.19	9	无	1828.92	4	惧	18.7024	11	色	949.075	6
1000	面有愧色	Guilty look	4.21739	0.98687	5.41304	1.25744	5.46	1.63145	7.02	1.28556	4.21739	1.0853	5.08696	1.31125	5.84	1.40475	6.76	1.23423	4.21739	0.902347	5.73913	1.13688	5.08	1.77764	7.28	1.30767	面有愧色	46	23	23	50	25	25	面有愧色	34	33	面	2739.19	9	有	8648.03	6	愧	14.8491	12	色	949.075	6
1005	民办小学	Private primary school	4.92857	0.600522	4.47619	1.27333	4.38	1.70102	7.2	1.2454	5.15	0.48936	4.8	0.951453	4.07692	1.57285	7	1.09545	4.72727	0.631085	4.18182	1.46828	4.70833	1.80529	7.41667	1.38051	民办小学	42	20	22	50	26	24	民办小学	49	20	民	2137.66	5	办	876.048	4	小	2135.97	3	学	4035.57	8
1009	民俗学家	Folklorist	5.2619	0.543679	4.66667	1.35551	4.54167	1.051	5.97917	1.91844	5.25	0.55012	5.25	0.55012	4.4	1.29099	6.24	1.45144	5.27273	0.550482	4.13636	1.64159	4.69565	0.702902	5.69565	2.32447	民俗学家	42	20	22	48	25	23	民俗学家	67	32	民	2137.66	5	俗	126.337	9	学	4035.57	8	家	3873.64	10
1010	民政局长	Bureau of civil affairs	4.97938	0.352945	4.52577	1.38514	3.53061	1.55593	6.97959	1.5744	5	0.210819	4.84783	0.595068	3.41667	1.5299	6.875	1.51263	4.96078	0.445456	4.23529	1.78424	3.64	1.60416	7.08	1.6563	民政局长	97	46	51	49	24	25	民政局长	57	25	民	2137.66	5	政	1465.79	9	局	650.051	7	长	2117.13	4
1012	名士风流	Unconventional ways of scholars	5.75	1.25218	5.26923	1.38108	4.84615	1.68482	6.61538	1.67043	5.47059	1.06495	5.33333	1.21106	4.2963	1.5396	6.59259	1.3376	6.01887	1.36566	5.20755	1.53621	5.44	1.66032	6.64	1.9975	名士风流	104	51	53	52	27	25	名士风流	33	23	名	1361.14	6	士	368.569	3	风	877.382	4	流	948.45	10
1015	明白了当	Straightforward	5.82222	1.3019	4.84444	1.73147	6.32653	1.16168	6.97959	1.10849	5.90909	1.306	5.27273	1.24142	5.84	1.02794	6.56	1.15758	5.73913	1.32175	4.43478	2.04108	6.83333	1.09014	7.41667	0.880547	明白了当	45	22	23	49	25	24	明白了当	17	21	明	1782.89	8	白	720.164	5	了	5827.94	2	当	1983.76	6
1018	明里暗里	In the dark	4.15217	1.13465	5.30435	0.695048	4.57447	1.65167	6.78723	1.39776	4.31818	1.24924	5.18182	0.501081	4.08696	1.44326	6.47826	1.08165	4	1.02151	5.41667	0.829702	5.04167	1.73153	7.08333	1.6129	明里暗里	46	22	24	47	23	24	明里暗里	103	35	明	1782.89	8	里	2015.7	7	暗	149.673	13	里	2015.7	7
1020	明修栈道	Deceive someone	5.29787	1.08176	5.57447	1.15617	4.71429	1.79118	6.83673	1.34392	5.28	1.30767	5.72	0.842615	4.64	1.97653	6.68	1.31403	5.31818	0.779888	5.40909	1.43623	4.79167	1.61458	7	1.38313	明修栈道	47	25	22	49	25	24	明修栈道	83	38	明	1782.89	8	修	374.168	9	栈	2.69383	9	道	2174.2	12
1025	摸摸索索	Touch the cable	4.22917	1.07663	5.27083	1.51221	5.5102	1.41602	6.7551	1.40728	3.84	1.21381	5.68	1.14455	5.625	1.40844	6.41667	1.1389	4.65217	0.71406	4.82609	1.74908	5.4	1.44338	7.08	1.57903	摸摸索索	48	25	23	49	24	25	摸摸索索	32	46	摸	54.3121	13	摸	54.3121	13	索	179.603	10	索	179.603	10
1026	模拟考试	Mock exam	4.69231	0.986087	5.17308	1.33977	3.92	2.07846	7.46	1.19881	5.13462	0.444083	4.90385	0.975376	3.48	1.55778	6.92	1.22202	4.25	1.16946	5.44231	1.58935	4.36	2.44745	8	0.912871	模拟考试	104	52	52	50	25	25	模拟考试	85	35	模	215.745	14	拟	68.9652	7	考	527.554	6	试	334.434	8
1027	摩天大厦	Skyscraper	5.85106	1.12247	5.78723	1.66728	4.125	1.64543	6.85417	1.36817	5.82609	1.11405	5.86957	1.5755	4.08333	1.97631	6.5	1.47442	5.875	1.15392	5.70833	1.78104	4.16667	1.27404	7.20833	1.17877	摩天大厦	47	23	24	48	24	24	摩天大厦	104	34	摩	57.0542	15	天	2247.5	4	大	6744.01	3	厦	29.6988	12
1030	末梢神经	Peripheral nerve	4.95349	0.65296	4.09302	1.75681	4.30612	1.99169	7.04082	1.48547	5	0	4.55	1.46808	3.8	1.87083	6.88	1.53623	4.91304	0.900154	3.69565	1.91726	4.83333	2.01444	7.20833	1.444	末梢神经	43	20	23	49	25	24	末梢神经	76	33	末	165.304	5	梢	10.81	11	神	903.332	9	经	3714.01	8
1031	莫可名状	That cannot be described	4.85106	0.658679	4.80851	1.4542	4.98	1.11557	5.18	2.33597	4.79167	0.779028	5.25	0.442326	4.96	1.0198	5.2	1.87083	4.91304	0.514609	4.34783	1.94489	5	1.22474	5.16	2.76405	莫可名状	47	24	23	50	25	25	莫可名状	58	28	莫	156.478	10	可	3245.08	5	名	1361.14	6	状	175.708	7
1035	母鸡下蛋	Hen laying eggs	5.5625	1.02949	4.875	2.00664	4.5	1.80984	6.84	1.55655	5.66667	1.00722	5.08333	1.6129	3.88	1.73973	7.04	1.05987	5.45833	1.06237	4.66667	2.35292	5.12	1.69115	6.64	1.93391	母鸡下蛋	48	24	24	50	25	25	母鸡下蛋	56	26	母	361.624	5	鸡	85.1377	7	下	2891.04	3	蛋	121.073	11
1038	目光灼灼	Glowing eyes	5.30435	1.41216	5.8913	1.28631	5	1.52984	6.77083	1.35646	5.45455	1.59545	5.59091	1.53248	5.04	1.54056	6.4	1.5	5.16667	1.23945	6.16667	0.963087	4.95652	1.55149	7.17391	1.07247	目光灼灼	46	22	24	48	25	23	目光灼灼	81	25	目	1386.17	5	光	802.844	6	灼	5.22572	7	灼	5.22572	7
1040	奶声奶气	Child’s tone	4.45833	1.64974	4.77083	1.78933	5.3	1.47427	6.84	1.50319	4.25	1.32698	5.33333	1.09014	5.28	1.4	6.72	1.33915	4.66667	1.92617	4.20833	2.16653	5.32	1.57374	6.96	1.67033	奶声奶气	48	24	24	50	25	25	奶声奶气	39	21	奶	109.183	5	声	768.616	7	奶	109.183	5	气	1139.89	4
1042	南回归线	Tropic of capricorn	5	0	4.30952	1.40536	4.04082	1.97863	6.91837	1.68123	5	0	4.47619	1.28915	3.52	1.82848	6.36	1.823	5	0	4.14286	1.52597	4.58333	2.01983	7.5	1.31876	南回归线	42	21	21	49	25	24	南回归线	83	28	南	1076.94	9	回	1114.06	6	归	213.659	5	线	755.686	8
1044	脑袋瓜子	Head	4.93617	0.484735	4.60638	1.40626	5.54167	2.12341	7.60417	1.12495	4.95833	0.358641	5	0	4.875	2.23242	7.125	1.07592	4.91304	0.596432	4.19565	1.94667	6.20833	1.81729	8.08333	0.974308	脑袋瓜子	47	24	23	48	24	24	脑袋瓜子	74	29	脑	314.9	10	袋	71.6849	11	瓜	58.743	5	子	3348.01	3
1047	能者多劳	An able man is always busy	5.91489	1.4866	5.74468	1.5807	5.78	1.87671	7.52	1.05444	6.17391	1.07247	5.26087	1.62976	5.92	1.89121	7.36	0.860233	5.66667	1.78561	6.20833	1.41357	5.64	1.89033	7.68	1.21518	能者多劳	47	23	24	50	25	25	能者多劳	42	31	能	2883.75	10	者	2335.76	8	多	2609.35	6	劳	310.929	7
1048	逆耳之言	Bitter truth	5.0625	1.47902	5.83333	1.4635	4.73469	1.83457	7.14286	0.912871	5.125	1.42379	5.45833	1.41357	4.8	1.63299	6.96	0.934523	5	1.56038	6.20833	1.444	4.66667	2.05715	7.33333	0.868115	逆耳之言	48	24	24	49	25	24	逆耳之言	66	24	逆	17.8328	9	耳	161.511	6	之	2500.29	2	言	674.584	7
1051	年过古稀	Antique	5.70213	1.26688	4.95745	1.60105	3.54902	1.83645	7.64706	1.09222	5.91667	1.21285	5.16667	1.711	3.22222	1.88788	7.66667	1.14354	5.47826	1.30974	4.73913	1.48377	3.91667	1.74248	7.625	1.05552	年过古稀	47	24	23	51	27	24	年过古稀	72	29	年	5151.12	6	过	2727.03	6	古	540.629	5	稀	50.6037	12
1054	年年月月	Months and years	5.08696	0.354406	4.28261	1.48568	3.58	1.80803	7.58	0.991597	5.08333	0.408248	5.08333	0.408248	3.6	1.87083	7.36	0.994987	5.09091	0.294245	3.40909	1.73642	3.56	1.78139	7.8	0.957427	年年月月	46	24	22	50	25	25	年年月月	74	20	年	5151.12	6	年	5151.12	6	月	1839.86	4	月	1839.86	4
1056	年深月久	Over a long period of time	5.1875	1.02431	4.625	1.60617	4.01923	1.67438	6.36538	1.93045	5.41667	0.653863	4.91667	1.24819	4.37037	1.62073	6.59259	1.36605	4.95833	1.26763	4.33333	1.88049	3.64	1.68028	6.12	2.40347	年深月久	48	24	24	52	27	25	年深月久	102	24	年	5151.12	6	深	665.861	11	月	1839.86	4	久	303.16	3
1057	年长日久	Long time	5.34043	0.787859	4.46809	1.70487	4.10204	1.75885	7.32653	1.08758	5.34783	0.71406	4.95652	1.3307	4.12	1.69115	7.2	0.957427	5.33333	0.868115	4	1.91107	4.08333	1.86307	7.45833	1.21509	年长日久	47	23	24	49	25	24	年长日久	31	17	年	5151.12	6	长	2117.13	4	日	3252.04	4	久	303.16	3
1060	宁缺毋滥	It is better to leave a deficiency uncovered than to have it covered without discretion	5.48936	1.74297	5.76596	1.61801	6.21569	1.62866	7.31373	1.14	5.3913	1.77711	5.52174	1.62003	5.84615	1.66595	7	1.2	5.58333	1.74248	6	1.61515	6.6	1.52753	7.64	0.994987	宁缺毋滥	47	23	24	51	26	25	宁缺毋滥	53	32	宁	284.092	5	缺	221.146	10	毋	3.23954	4	滥	28.9463	13
1067	努尔哈赤	Nurhachi	5.28261	1.02552	4.97826	1.65313	3.9375	1.56295	6.6875	1.7764	5.18182	0.501081	5.31818	0.838727	3.92	1.77764	6.8	1.70783	5.375	1.34528	4.66667	2.11961	3.95652	1.3307	6.56522	1.87873	努尔哈赤	46	22	24	48	25	23	努尔哈赤	597	28	努	166.979	7	尔	257.362	5	哈	171.841	9	赤	25.2059	7
1071	诺诺连声	Keep on saying "yes"	4.42553	1.15617	5	1.10335	4.91837	1.83526	6.53061	2.02178	4.4	1.29099	5.04	0.840635	4.92308	1.76461	6.65385	1.59856	4.45455	1.01076	4.95455	1.36198	4.91304	1.95199	6.3913	2.44464	诺诺连声	47	25	22	49	26	23	诺诺连声	67	34	诺	42.444	10	诺	42.444	10	连	505.817	7	声	768.616	7
1072	女孩子家	Girl	5.04762	0.763573	4.7381	1.41524	4.71111	1.29021	7.44444	1.11916	5	0.333333	5	0	4.63636	1.36436	7.09091	1.23091	5.08696	0.99604	4.52174	1.90381	4.78261	1.24157	7.78261	0.902347	女孩子家	42	19	23	45	22	23	女孩子家	77	25	女	1009.76	3	孩	233.24	9	子	3348.01	3	家	3873.64	10
1073	女中丈夫	As a man amongst the womenfolk	5.86667	1.15994	5.8	1.3751	4.79592	1.2244	5.81633	1.92217	5.68182	1.21052	5.54545	1.18431	4.625	1.34528	6.08333	1.24819	6.04348	1.10693	6.04348	1.52191	4.96	1.09848	5.56	2.39931	女中丈夫	45	22	23	49	24	25	女中丈夫	20	14	女	1009.76	3	中	7314.64	4	丈	91.1847	3	夫	260.378	4
1074	偶尔为之	Do it occasionally	4.75556	0.679423	4.6	1.51357	5.95833	1.25407	6.95833	1.27092	4.86364	0.710161	5.27273	0.827032	5.625	1.34528	6.75	1.25974	4.65217	0.647281	3.95652	1.74456	6.29167	1.08264	7.16667	1.27404	偶尔为之	45	22	23	48	24	24	偶尔为之	74	22	偶	39.5998	11	尔	257.362	5	为	5620.72	4	之	2500.29	2
1077	排难解纷	Mediate a dispute	5.89362	1.16533	5.46809	1.34893	6.08333	1.31818	6.75	1.176	5.84	1.1431	5.52	1.50333	5.91304	1.41142	6.47826	1.27456	5.95455	1.21409	5.40909	1.18157	6.24	1.23423	7	1.04083	排难解纷	47	25	22	48	23	25	排难解纷	103	41	排	353.569	11	难	719.944	10	解	1248.17	13	纷	91.1554	7
1081	盘根问底	Inquisitive	4.22917	1.66618	5.5625	1.1281	5.08	1.99837	7.38	1.00793	4.48	1.78232	5.52	1.04563	4.38462	1.98145	7.42308	0.808608	3.95652	1.52191	5.6087	1.23359	5.83333	1.76109	7.33333	1.20386	盘根问底	48	25	23	50	26	24	盘根问底	15	35	盘	164.658	11	根	669.907	10	问	1457.1	6	底	371.255	8
1082	蹒蹒跚跚	Limps	4.04167	0.988408	5.29167	1.39845	4.85417	1.70093	6.89583	1.32472	4.20833	1.17877	5.20833	1.25036	4.95833	1.70623	6.5	1.21584	3.875	0.740887	5.375	1.55515	4.75	1.72576	7.29167	1.33447	蹒蹒跚跚	48	24	24	48	24	24	蹒蹒跚跚	44	58	蹒	1.45136	17	蹒	1.45136	17	跚	1.45136	12	跚	1.45136	12
1083	旁系亲属	Collateral relatives	4.95349	0.575429	4.90698	1.10871	4.4375	1.52854	7.20833	1.28756	5.1	0.307794	4.95	0.394034	3.95833	1.57367	6.91667	1.28255	4.82609	0.716822	4.86957	1.48643	4.91667	1.34864	7.5	1.25109	旁系亲属	43	20	23	48	24	24	旁系亲属	72	38	旁	118.465	10	系	1388.73	7	亲	659.671	9	属	398.146	12
1084	膀阔腰圆	Broad waist	4.67308	1.43765	5.18269	1.3565	4.76087	1.88779	6.91304	1.07137	5.43137	0.943502	5.31373	1.00976	4.21739	1.67757	6.69565	1.01957	3.9434	1.45991	5.0566	1.62214	5.30435	1.9641	7.13043	1.09977	膀阔腰圆	104	51	53	46	23	23	膀阔腰圆	23	49	膀	14.8239	14	阔	68.8073	12	腰	57.7591	13	圆	135.24	10
1087	跑跑颠颠	Bustle about	4.71739	1.377	5.54348	1.18709	5.71429	1.32288	6.67347	1.77233	4.91304	1.44326	5.21739	1.41282	5.83333	1.37261	7.08333	1.01795	4.52174	1.30974	5.86957	0.814881	5.6	1.29099	6.28	2.22711	跑跑颠颠	46	23	23	49	24	25	跑跑颠颠	30	56	跑	137.974	12	跑	137.974	12	颠	29.0429	16	颠	29.0429	16
1088	跑上跑下	Run up and down	4.63043	1.08236	5.47826	0.93664	5.68	1.86744	7.3	1.18235	5	0.738549	5.30435	0.702902	5.64	1.9975	7.12	1.0924	4.26087	1.25109	5.65217	1.11227	5.72	1.76824	7.48	1.26227	跑上跑下	46	23	23	50	25	25	跑上跑下	74	30	跑	137.974	12	上	5278.79	3	跑	137.974	12	下	2891.04	3
1089	喷云吐雾	Smoke heavily	4.83333	1.66738	5.66667	1.24342	4.76596	1.63139	6.87234	1.31243	4.83333	1.34056	5.58333	1.10007	4.56522	1.77933	6.6087	0.891328	4.83333	1.9708	5.75	1.39096	4.95833	1.48848	7.125	1.59653	喷云吐雾	48	24	24	47	23	24	喷云吐雾	50	35	喷	48.1297	12	云	264.003	4	吐	49.3844	6	雾	33.5569	13
1093	披红挂绿	Drape an honorific red silk band over sb.'s shoulders	5.42553	1.54279	5.95745	1.54579	5.4375	1.5424	6.33333	1.56196	6.21739	1.0853	6.08696	1.56417	5.41667	1.90917	6.95833	0.80645	4.66667	1.55106	5.83333	1.55106	5.45833	1.10253	5.70833	1.87615	披红挂绿	47	23	24	48	24	24	披红挂绿	66	34	披	34.1829	8	红	461.971	6	挂	91.4446	9	绿	200.236	11
1096	劈劈啪啪	Cleave pops; crackle	4.6	1.13618	5.2	1.50151	4.89796	1.29494	6.59184	1.60622	4.95238	0.384212	4.57143	1.07571	4.72	1.48661	6.72	1.1	4.29167	1.45898	5.75	1.62186	5.08333	1.05981	6.45833	2.02117	劈劈啪啪	45	21	24	49	25	24	劈劈啪啪	121	52	劈	8.69796	15	劈	8.69796	15	啪	6.23276	11	啪	6.23276	11
1097	噼噼啪啪	Crack	4.02128	1.18852	5.53191	1.13924	4.91837	1.56574	6.69388	1.3417	4.20833	1.21509	5.41667	0.974308	4.58333	1.58572	6.54167	1.02062	3.82609	1.15413	5.65217	1.30065	5.24	1.50776	6.84	1.59896	噼噼啪啪	47	24	23	49	24	25	噼噼啪啪	244	54	噼	0.892046	16	噼	0.892046	16	啪	6.23276	11	啪	6.23276	11
1099	片言只字	Just a few words or a short note	4.10638	1.12741	5.31915	1.30395	5.27083	1.23322	6.8125	1.34728	4.21739	1.16605	5.17391	1.23038	5.47826	0.947224	6.47826	0.947224	4	1.10335	5.45833	1.38247	5.08	1.44106	7.12	1.58955	片言只字	47	23	24	48	23	25	片言只字	63	22	片	543.521	4	言	674.584	7	只	1313.94	5	字	580.813	6
1100	缥缥缈缈	Misty	4.95652	0.965091	4.6087	1.40599	4.375	1.14157	6.625	1.52462	5.08696	1.04067	5.30435	1.06322	4.64	1.25433	5.92	1.57903	4.82609	0.886883	3.91304	1.37883	4.08696	0.949308	7.3913	1.03305	缥缥缈缈	46	23	23	48	25	23	缥缥缈缈	15	52	缥	1.09618	14	缥	1.09618	14	缈	1.00228	12	缈	1.00228	12
1101	飘飘悠悠	Floating upward	4.63043	1.14229	4.71739	1.45546	4.95833	1.30398	6.58333	1.55513	4.40909	0.854071	4.72727	1.24142	4.70833	1.16018	6.875	1.07592	4.83333	1.34056	4.70833	1.65448	5.20833	1.41357	6.29167	1.89918	飘飘悠悠	46	22	24	48	24	24	飘飘悠悠	42	52	飘	42.331	15	飘	42.331	15	悠	38.1763	11	悠	38.1763	11
1102	拼命三郎	Workaholic	5.10791	1.32802	5.82734	1.27931	5.17391	1.79263	7.02174	1.22	4.98529	1.2398	5.51471	1.02931	4.6087	1.69864	6.52174	1.30974	5.22535	1.40608	6.12676	1.42357	5.73913	1.73775	7.52174	0.897956	拼命三郎	139	68	71	46	23	23	拼命三郎	141	28	拼	40.8878	9	命	1075.17	8	三	1255.48	3	郎	28.1624	8
1106	乒乓球馆	Table tennis hall	5.2439	0.582258	4.92683	1.33023	5.21569	1.60392	7.03922	1.61197	5.16667	0.383482	5.16667	0.514496	4.69231	1.54322	7.03846	1.37057	5.30435	0.702902	4.73913	1.71139	5.76	1.50776	7.04	1.85921	乒乓球馆	41	18	23	51	26	25	乒乓球馆	65	34	乒	21.7902	6	乓	25.4869	6	球	607.207	11	馆	292.11	11
1107	乒乒乓乓	Clatter	4.20833	1.39845	5.39583	1.3004	4.78723	1.28429	6.78723	1.44367	4.16	1.21381	5.32	0.988264	4.52174	1.344	6.73913	0.963771	4.26087	1.60163	5.47826	1.59173	5.04167	1.19707	6.83333	1.8098	乒乒乓乓	48	25	23	47	23	24	乒乒乓乓	229	24	乒	21.7902	6	乒	21.7902	6	乓	25.4869	6	乓	25.4869	6
1108	平淡无味	Dull and tasteless	4.46078	0.712985	4.76471	1.11849	5.16327	1.55921	7	1.20761	4.5	0.707107	5.04	0.604743	5.12	1.48099	6.72	1.1	4.42308	0.723449	4.5	1.40726	5.20833	1.66757	7.29167	1.26763	平淡无味	102	50	52	49	25	24	平淡无味	106	28	平	1603.12	5	淡	94.8944	11	无	1828.92	4	味	273.699	8
1109	平面几何	Plane geometry	4.92857	0.260661	4.57143	1.12927	5.29412	2.07166	7.37255	1.34106	5	0	4.90476	0.300793	4.76923	1.60767	7.07692	1.52113	4.85714	0.358569	4.2381	1.51343	5.84	2.37487	7.68	1.06927	平面几何	42	21	21	51	26	25	平面几何	70	23	平	1603.12	5	面	2739.19	9	几	707.904	2	何	861.736	7
1111	平平和和	Peaceful	5.70833	0.988408	4.3125	1.81197	5.87234	1.36122	7.29787	0.882558	5.70833	0.80645	4.75	1.77544	5.47826	1.41001	6.95652	0.705708	5.70833	1.16018	3.875	1.77697	6.25	1.22474	7.625	0.923721	平平和和	48	24	24	47	23	24	平平和和	9	26	平	1603.12	5	平	1603.12	5	和	4149.57	8	和	4149.57	8
1112	平平庸庸	Mediocre	4.35556	0.829993	4.57778	1.09729	5.14286	1.35401	7.28571	1.04083	4.59091	0.666125	4.86364	0.83355	5.54167	0.977093	6.79167	0.977093	4.13043	0.919701	4.30435	1.25896	4.76	1.56205	7.76	0.879394	平平庸庸	45	22	23	49	24	25	平平庸庸	55	32	平	1603.12	5	平	1603.12	5	庸	17.449	11	庸	17.449	11
1113	平平展展	Flat	5.4	0.750757	4.71111	1.27247	5.56	1.35767	6.52	1.56805	5.65217	0.884652	5.17391	0.834058	5.52	1.5308	6.88	1.33292	5.13636	0.467563	4.22727	1.47783	5.6	1.19024	6.16	1.72434	平平展展	45	23	22	50	25	25	平平展展	28	30	平	1603.12	5	平	1603.12	5	展	1730.62	10	展	1730.62	10
1114	凭票供应	Coupon-based supply	4.66667	0.603023	4.46667	1.39153	3.08511	1.63959	7.04255	1.61457	4.72727	0.550482	5	0.308607	2.78261	1.95301	7.43478	1.23679	4.6087	0.656376	3.95652	1.79591	3.375	1.24455	6.66667	1.85722	凭票供应	45	22	23	47	23	24	凭票供应	79	34	凭	70.3308	8	票	277.388	11	供	477.702	8	应	1411	7
1115	屏气凝神	Deep concentration	5.29787	1.17797	4.85106	1.62827	6.5	1.28824	7.10417	1.15297	5.13043	1.14035	4.95652	1.29609	6.34783	1.19121	6.73913	1.09617	5.45833	1.21509	4.75	1.91675	6.64	1.38082	7.44	1.12101	屏气凝神	47	23	24	48	23	25	屏气凝神	29	38	屏	23.892	9	气	1139.89	4	凝	75.6484	16	神	903.332	9
1116	屏声息气	Respectfully	4.5	1.11056	5.13043	1.73344	6	1.67586	7.27083	0.916505	4.18182	1.13961	4.72727	1.69542	5.875	1.56906	7	1.02151	4.79167	1.02062	5.5	1.71945	6.125	1.80127	7.54167	0.72106	屏声息气	46	22	24	48	24	24	屏声息气	22	30	屏	23.892	9	声	768.616	7	息	562.906	10	气	1139.89	4
1117	屏息静气	Breath holding and static breath	5.51111	0.694858	4.82222	1.41885	6.08	1.79387	7.24	1.00122	5.54545	0.595801	5.18182	0.852803	6.48	1.15902	7.12	0.927362	5.47826	0.790257	4.47826	1.75472	5.68	2.21209	7.36	1.07548	屏息静气	45	22	23	50	25	25	屏息静气	89	37	屏	23.892	9	息	562.906	10	静	215.956	14	气	1139.89	4
1118	颇有道理	Contain an element of truth	5.76596	1.06756	4.87234	1.76459	5.30612	1.68577	7.14286	1.1547	5.79167	1.21509	5.125	1.56906	4.84	1.49108	6.84	1.17898	5.73913	0.915393	4.6087	1.94794	5.79167	1.76879	7.45833	1.06237	颇有道理	47	24	23	49	25	24	颇有道理	96	40	颇	52.8315	11	有	8648.03	6	道	2174.2	12	理	2917.08	11
1120	迫不得已	Have no alternative against one's will	4.04167	1.12908	5.35417	1.13905	3.61702	1.84807	7.25532	0.988369	4.08	1.28841	5.24	1.09087	3.65217	1.5553	6.82609	0.984063	4	0.953463	5.47826	1.20112	3.58333	2.12473	7.66667	0.816497	迫不得已	48	25	23	47	23	24	迫不得已	1156	26	迫	89.2972	8	不	9822.27	4	得	2822.14	11	已	1213.41	3
1122	破釜沉舟	Cut off all means of retreat	5.17757	1.67001	6.38318	1.40514	5.16667	2.42622	7.29167	1.14777	4.98148	1.83766	6.25926	1.36237	5.08333	2.48328	7.125	1.15392	5.37736	1.47056	6.50943	1.44944	5.25	2.41823	7.45833	1.14129	破釜沉舟	107	54	53	48	24	24	破釜沉舟	409	33	破	408.047	10	釜	0.569521	10	沉	227.009	7	舟	26.6777	6
1127	铺天盖地	To blot out the sky and cover up the earth	4.55422	1.39032	6.01205	1.2046	3.65217	1.68941	7.36957	0.92757	4.56818	1.22755	5.72727	1.08614	3.68	1.8421	7.24	0.879394	4.53846	1.57022	6.33333	1.26352	3.61905	1.53219	7.52381	0.980767	铺天盖地	83	44	39	46	25	21	铺天盖地	1343	33	铺	69.4319	12	天	2247.5	4	盖	136.404	11	地	4442.5	6
1128	仆仆风尘	Endure the hardships of travel	4.97778	1.09729	5.42222	1.37327	4.90196	1.5265	6.90196	1.45952	5.18182	1.05272	5.45455	1.59545	5	1.64924	6.73077	1.11562	4.78261	1.1264	5.3913	1.15755	4.8	1.41421	7.08	1.75404	仆仆风尘	45	22	23	51	26	25	仆仆风尘	53	18	仆	18.173	4	仆	18.173	4	风	877.382	4	尘	28.7632	6
1132	普通邮票	Ordinary stamp	5	0.210819	3.91304	1.77421	6.14894	2.01061	7.34043	1.25588	5	0.301511	4.73913	1.25109	4.83333	1.43456	7.04167	1.16018	5	0	3.08696	1.85651	7.52174	1.56291	7.65217	1.30065	普通邮票	46	23	23	47	24	23	普通邮票	89	40	普	185.457	12	通	1622.23	10	邮	157.406	7	票	277.388	11
1136	七老八十	In one's seventies and eighties	4.1875	1.26586	4.27083	1.4253	3.30612	1.58383	7.12245	1.45248	4.2	1.29099	4.48	1.32665	3.45833	1.91059	7.29167	0.750604	4.17391	1.26678	4.04348	1.52191	3.16	1.21381	6.96	1.90351	七老八十	48	25	23	49	24	25	七老八十	55	12	七	238.784	2	老	1102.08	6	八	368.864	2	十	1226.38	2
1139	七七八八	Bits and pieces	4.7	0.594588	4.68	1.42049	4.875	0.866025	6.125	1.64543	4.67347	0.515904	5.08163	0.70228	4.92	1.15181	5.92	1.52534	4.72549	0.665686	4.29412	1.79214	4.82609	0.387553	6.34783	1.77377	七七八八	100	49	51	48	25	23	七七八八	28	8	七	238.784	2	七	238.784	2	八	368.864	2	八	368.864	2
1141	七十二行	All sorts of occupations	5.05	0.220721	4.6	1.21529	4.82	1.67442	6.68	1.85648	5	0	4.94737	0.229416	4.42308	1.74753	7.03846	1.24838	5.09524	0.300793	4.28571	1.61688	5.25	1.51083	6.29167	2.31214	七十二行	40	19	21	50	26	24	七十二行	44	12	七	238.784	2	十	1226.38	2	二	1132.69	2	行	3839.45	6
1143	七折八扣	Various deductions	4.75	1.095	5.38462	1.07313	4.66	1.47924	6.28	1.62932	4.42	0.882714	5.4	0.903508	4.4	1.47196	6.6	1.19024	5.05556	1.18825	5.37037	1.21774	4.92	1.46969	5.96	1.94679	七折八扣	104	50	54	50	25	25	七折八扣	32	17	七	238.784	2	折	161.256	7	八	368.864	2	扣	59.8426	6
1147	期中考试	Midterm exams	4.2	1.82855	5.825	1.69293	3.69388	1.88419	7.71429	1.13652	5.40909	0.73414	4.81818	1.29601	4.03846	1.79957	7.23077	1.1422	2.72222	1.67352	7.05556	1.25895	3.30435	1.94082	8.26087	0.864312	期中考试	40	22	18	49	26	23	期中考试	169	30	期	1749.32	12	中	7314.64	4	考	527.554	6	试	334.434	8
1152	齐齐哈尔	Qiqihar	5	0	3.92857	1.70212	5.06522	0.646432	6.73913	1.84312	5	0	4.57143	1.43427	5	0.308607	6.63636	1.29267	5	0	3.28571	1.73617	5.125	0.850192	6.83333	2.25864	齐齐哈尔	42	21	21	46	22	24	齐齐哈尔	1279	26	齐	148.346	6	齐	148.346	6	哈	171.841	9	尔	257.362	5
1155	奇峰怪石	Odd rocks	5.69565	1.00818	5.41304	1.85683	3.77551	1.73524	6.93878	1.43481	5.54167	0.977093	5.66667	1.30773	3.32	1.8421	6.68	1.43527	5.86364	1.03719	5.13636	2.31549	4.25	1.51083	7.20833	1.41357	奇峰怪石	46	24	22	49	25	24	奇峰怪石	85	31	奇	294.162	8	峰	95.9205	10	怪	126.439	8	石	524.158	5
1159	奇奇怪怪	Astonishing	4.45652	1.14904	5.3913	1.18281	4.63462	1.34352	6.90385	1.51152	4.08696	1.12464	5.43478	1.30823	4.74074	1.25859	6.55556	1.47631	4.82609	1.07247	5.34783	1.07063	4.52	1.44684	7.28	1.48661	奇奇怪怪	46	23	23	52	27	25	奇奇怪怪	241	32	奇	294.162	8	奇	294.162	8	怪	126.439	8	怪	126.439	8
1161	起起伏伏	Ups and downs	4.52083	1.16673	5.39583	1.23322	4.59184	1.35275	7.02041	1.34613	4.83333	0.916831	5.45833	1.14129	5	1.31876	6.625	1.40844	4.20833	1.31807	5.33333	1.34056	4.2	1.29099	7.4	1.19024	起起伏伏	48	24	24	49	24	25	起起伏伏	87	32	起	2047.96	10	起	2047.96	10	伏	75.6933	6	伏	75.6933	6
1162	起早摸黑	Start early in the dark	4.45283	1.14752	5.46226	1.25868	5.09804	2.30004	7.33333	1.25963	4.75	0.987669	5.21154	1.1261	5.11538	2.32081	7.46154	0.904689	4.16667	1.22474	5.7037	1.34065	5.08	2.32594	7.2	1.55456	起早摸黑	106	52	54	51	26	25	起早摸黑	73	41	起	2047.96	10	早	374.353	6	摸	54.3121	13	黑	323.568	12
1163	气冲霄汉	Have a noble revolutionary spirit and great enthusiasm	5.71429	2.06155	6.55102	1.72072	4.76	2.06585	6.62	1.73664	5.8	2.16025	6.76	1.50776	4.16	2.21133	6.68	1.62583	5.625	1.99592	6.33333	1.92617	5.36	1.75309	6.56	1.87261	气冲霄汉	49	25	24	50	25	25	气冲霄汉	35	30	气	1139.89	4	冲	255.455	6	霄	2.84284	15	汉	311.462	5
1166	气味相投	Have the same likes and dislikes	4.60377	1.69974	5.63208	1.14912	5.41509	1.75887	7.13208	1.0568	4	1.22474	5.41509	1.15082	4.78571	1.81265	7	1.21716	5.20755	1.89492	5.84906	1.11625	6.12	1.42361	7.28	0.842615	气味相投	106	53	53	53	28	25	气味相投	91	28	气	1139.89	4	味	273.699	8	相	1565.14	9	投	677.976	7
1169	弃旧图新	Reject the old for the new	4.99029	1.86029	6	1.1799	5.91837	1.7776	6.73469	1.59132	5.68627	1.77189	5.84314	1.33225	5.5	2	6.75	1.2938	4.30769	1.69819	6.15385	0.997735	6.32	1.46401	6.72	1.86011	弃旧图新	103	51	52	49	24	25	弃旧图新	68	33	弃	53.252	7	旧	200.293	5	图	592.919	8	新	2264.38	13
1170	掐头去尾	Break off both begining and ends	4.32609	1.21206	5.15217	1.09478	5.89362	1.74747	7.08511	1.24813	4.30435	1.22232	5.56522	0.895752	5.78261	1.83294	6.95652	1.10693	4.34783	1.22877	4.73913	1.13688	6	1.69398	7.20833	1.38247	掐头去尾	46	23	23	47	23	24	掐头去尾	47	28	掐	2.45568	11	头	1198.71	5	去	1621.28	5	尾	77.1902	7
1171	千古不变	Eternal unchanged	5.40816	1.09769	5.17347	1.51915	3.59184	1.85874	6.77551	1.62359	5.30769	1.28901	5.46154	1.27219	3.28	1.76824	6.56	1.60935	5.52174	0.845822	4.84783	1.72834	3.91667	1.93181	7	1.64184	千古不变	49	26	23	49	25	24	千古不变	58	20	千	319.798	3	古	540.629	5	不	9822.27	4	变	1060.95	8
1172	千回百转	Innumerable twists and turns	5.20408	1.17224	5.40816	1.27342	4.875	1.60617	6.66667	1.47797	5.44	0.916515	5.52	0.918332	5.16667	1.46456	6.25	1.2938	4.95833	1.36666	5.29167	1.57367	4.58333	1.71735	7.08333	1.55806	千回百转	49	25	24	48	24	24	千回百转	59	23	千	319.798	3	回	1114.06	6	百	560.83	6	转	690.434	8
1173	千里之堤	Great effort；thousand miles of embankment	5.15909	0.805307	5.27273	1.26424	4.06	1.81164	6.82	1.30447	5.15	0.366348	4.8	1.10501	3.72	1.83757	6.36	1.57797	5.16667	1.0495	5.66667	1.27404	4.4	1.75594	7.28	0.737111	千里之堤	44	20	24	50	25	25	千里之堤	47	24	千	319.798	3	里	2015.7	7	之	2500.29	2	堤	20.6157	12
1174	千门万户	Numerous households	5.34783	0.640048	4.73913	1.56964	4.54	1.19881	6.9	1.52864	5.18182	0.501081	4.77273	1.23179	4.36	1.22066	6.96	1.17189	5.5	0.722315	4.70833	1.85283	4.72	1.17331	6.84	1.8412	千门万户	46	22	24	50	25	25	千门万户	58	13	千	319.798	3	门	1206.79	3	万	781.635	3	户	381.035	4
1175	千奇百怪	All sorts of strange things	5.06522	1.16241	5.43478	1.32752	4.30612	1.53031	6.65306	1.80913	5.16667	1.20386	5.58333	1.01795	4.28	1.69607	6.36	1.8	4.95455	1.13294	5.27273	1.60896	4.33333	1.37261	6.95833	1.80529	千奇百怪	46	24	22	49	25	24	千奇百怪	463	25	千	319.798	3	奇	294.162	8	百	560.83	6	怪	126.439	8
1178	牵肠挂肚	Be very worried about	4.37778	1.43478	6	1.02247	5.04255	1.92193	7.53191	0.952139	4.26087	1.7893	5.86957	1.21746	5.5	1.79371	7.41667	0.880547	4.5	0.963624	6.13636	0.774317	4.56522	1.97314	7.65217	1.0273	牵肠挂肚	45	23	22	47	24	23	牵肠挂肚	398	32	牵	53.19	9	肠	60.4217	7	挂	91.4446	9	肚	35.7274	7
1180	前半辈子	First half of one's life	4.85106	0.658679	4.53191	1.63987	3.88	1.52047	7.42	1.16216	4.91667	0.775532	5.20833	0.658005	3.56	1.55671	7.44	0.960902	4.78261	0.518435	3.82609	2.0372	4.2	1.44338	7.4	1.35401	前半辈子	47	24	23	50	25	25	前半辈子	14	29	前	2101.23	9	半	412.055	5	辈	69.2578	12	子	3348.01	3
1181	前车可鉴	Heed previous examples	5.80851	1.11586	5.02128	1.51068	5.05769	1.80862	7.05769	1.03684	5.95833	1.26763	5.29167	1.19707	4.59259	1.71552	6.92593	1.17427	5.65217	0.934622	4.73913	1.76371	5.56	1.80462	7.2	0.866025	前车可鉴	47	24	23	52	27	25	前车可鉴	46	31	前	2101.23	9	车	1057.01	4	可	3245.08	5	鉴	48.9809	13
1182	前俯后仰	Bend forward and backward	5.17476	0.954116	5.2233	1.25192	6.2449	1.50735	7.18367	1.43865	5.07692	0.904155	5.21154	0.824539	6	1.73205	7.32	0.945163	5.27451	1.00157	5.23529	1.58225	6.5	1.21584	7.04167	1.82921	前俯后仰	103	52	51	49	25	24	前俯后仰	100	31	前	2101.23	9	俯	8.59726	10	后	2743.81	6	仰	74.64	6
1183	前呼后应	Respond as echo to sound; act in cooperation	5.20588	1.3226	5.45098	1.27137	5.125	2.06928	7.14583	1.12967	4.76	1.37855	5.48	0.952762	4.75	2.2312	6.83333	0.916831	5.63462	1.12073	5.42308	1.52555	5.5	1.86501	7.45833	1.25036	前呼后应	102	50	52	48	24	24	前呼后应	52	30	前	2101.23	9	呼	243.298	8	后	2743.81	6	应	1411	7
1184	前思后想	Turn over in one's mind	5.03061	0.805318	5.09184	0.99573	6.18367	1.49546	7.32653	0.944011	5.29167	0.617419	5.14583	0.850271	5.68	1.57374	7.28	0.890693	4.78	0.887326	5.04	1.12413	6.70833	1.23285	7.375	1.0135	前思后想	98	48	50	49	25	24	前思后想	59	37	前	2101.23	9	思	1002.68	9	后	2743.81	6	想	1405.79	13
1186	枪林弹雨	A hail of bullets	4.02128	1.67448	6.46809	1.54429	3.13043	1.82097	7.21739	1.20946	4.13043	1.84155	6.52174	1.23838	3.08696	1.72977	6.86957	1.28997	3.91667	1.5299	6.41667	1.81579	3.17391	1.94591	7.56522	1.03687	枪林弹雨	47	23	24	46	23	23	枪林弹雨	561	35	枪	137.611	8	林	572.211	8	弹	245.239	11	雨	172.54	8
1187	强化食品	Fortified food	4.82609	0.797339	5.28261	1.18627	5.2	2	6.44	2.0816	4.90909	0.683763	5.27273	1.12045	4.7037	2.14503	6.81481	1.2415	4.75	0.896854	5.29167	1.26763	5.78261	1.67757	6	2.7303	强化食品	46	22	24	50	27	23	强化食品	62	34	强	972.351	12	化	2003.07	4	食	423.122	9	品	1689.38	9
1194	亲疏远近	Act rudely to relatives and friends but act politely to strangers	4.77	0.951925	4.94	1.17911	5.11321	1.90808	7	1.38675	4.83673	0.920755	5.18367	0.666879	5.17857	1.63421	6.89286	1.13331	4.70588	0.985781	4.70588	1.4872	5.04	2.20756	7.12	1.64114	亲疏远近	100	49	51	53	28	25	亲疏远近	70	35	亲	659.671	9	疏	18.9915	12	远	458.775	7	近	749.364	7
1198	勤杂人员	Assistant	4.93617	0.639438	4.34043	1.41846	4.66	1.64887	7.3	1.0351	4.95833	0.750604	4.83333	0.761387	4.08	1.6052	7	0.912871	4.91304	0.514609	3.82609	1.74908	5.24	1.50776	7.6	1.08012	勤杂人员	47	24	23	50	25	25	勤杂人员	90	28	勤	93.0252	13	杂	270.984	6	人	10357.8	2	员	1934.21	7
1200	轻机关枪	Light machine gun	5.09302	0.683616	5.25581	1.39886	4.40426	1.9963	6.31915	1.90087	5	0.324443	5.15	0.48936	4.13043	1.74002	6.34783	1.5258	5.17391	0.886883	5.34783	1.87347	4.66667	2.21981	6.29167	2.23566	轻机关枪	43	20	23	47	23	24	轻机关枪	67	29	轻	439.1	9	机	2206.73	6	关	2202.44	6	枪	137.611	8
1201	轻描淡写	Touch on lightly	4.62745	0.877909	4.73529	1.36379	5.56604	1.55055	7.26415	1.14608	4.36	0.984782	4.96	1.08722	5.32143	1.58823	7.07143	0.939999	4.88462	0.676028	4.51923	1.56544	5.84	1.49108	7.48	1.32665	轻描淡写	102	50	52	53	28	25	轻描淡写	876	36	轻	439.1	9	描	116.199	11	淡	94.8944	11	写	523.69	5
1202	轻如鸿毛	Light as a feather	4.10638	1.3868	4.55319	1.5716	4.98	1.87888	7.1	1.40335	3.6	1.52753	4.72	1.4	4.48	1.5843	6.76	1.33167	4.68182	0.945484	4.36364	1.76056	5.48	2.04369	7.44	1.41657	轻如鸿毛	47	25	22	50	25	25	轻如鸿毛	41	30	轻	439.1	9	如	1955.83	6	鸿	9.17835	11	毛	380.029	4
1203	轻声轻气	In a soft tone	5.4	1.09545	4.77778	1.47539	5.84906	1.58595	7.39623	0.947459	5.59091	0.959121	5	1.34519	5.85714	1.60357	7.46429	0.881167	5.21739	1.20441	4.56522	1.59049	5.84	1.59896	7.32	1.02956	轻声轻气	45	22	23	53	28	25	轻声轻气	14	29	轻	439.1	9	声	768.616	7	轻	439.1	9	气	1139.89	4
1205	轻于鸿毛	Lighter than a goose feather	4.20455	1.30437	4.88636	1.4502	4.91837	1.69358	7.38776	1.11461	4.09524	1.37495	4.7619	1.41084	4.83333	1.78561	7.125	1.15392	4.30435	1.25896	5	1.50756	5	1.63299	7.64	1.03602	轻于鸿毛	44	21	23	49	24	25	轻于鸿毛	47	27	轻	439.1	9	于	3580.5	3	鸿	9.17835	11	毛	380.029	4
1206	轻装步兵	Light infantry	5.52083	1.03121	4.625	1.60617	4.46809	1.86327	6.08511	1.90913	5.70833	1.12208	4.79167	1.5598	4.26087	1.76371	6.21739	1.56544	5.33333	0.916831	4.45833	1.66757	4.66667	1.9708	5.95833	2.21613	轻装步兵	48	24	24	47	23	24	轻装步兵	47	35	轻	439.1	9	装	700.949	12	步	720.388	7	兵	551.831	7
1207	倾巢而出	Sally forth in full strength to	4.97872	1.62172	5.95745	1.55979	4.05769	1.85148	6.82692	1.38226	5.12	1.87794	5.84	1.62481	4.32143	1.9824	6.60714	1.34272	4.81818	1.29601	6.09091	1.50899	3.75	1.67462	7.08333	1.41165	倾巢而出	47	25	22	52	28	24	倾巢而出	99	32	倾	120.618	10	巢	6.41647	11	而	2283.95	6	出	4757.26	5
1212	清洁公司	Cleaning company	5.18182	0.540143	4.29545	1.71965	4.88235	1.43732	6.92157	1.32428	5.09524	0.538958	5.09524	0.70034	4.53846	1.44861	6.73077	1.11562	5.26087	0.540824	3.56522	2.04108	5.24	1.3626	7.12	1.50886	清洁公司	44	21	23	51	26	25	清洁公司	67	29	清	730.146	11	洁	93.8458	9	公	2641.25	4	司	1252.34	5
1214	清水衙门	A government office free from corruption	6	1.50362	4.67021	1.74542	4.0625	2.05671	6.41667	1.95517	6.16	1.43411	5	2	3.69565	2.03235	6.47826	1.90381	5.81818	1.59273	4.29545	1.35101	4.4	2.06155	6.36	2.03879	清水衙门	47	25	22	48	23	25	清水衙门	66	31	清	730.146	11	水	1535.76	4	衙	7.86919	13	门	1206.79	3
1221	穷根究底	Get to the bottom of it all	4.57609	1.21091	5.47826	1.11034	6	1.76383	7.15217	1.34936	4.66667	1.34056	5.29167	1.08264	5.75	1.48177	6.54167	1.35066	4.47727	1.07435	5.68182	1.12911	6.27273	2.02794	7.81818	1.00647	穷根究底	46	24	22	46	24	22	穷根究底	33	32	穷	83.3257	7	根	669.907	10	究	441.006	7	底	371.255	8
1228	秋雨绵绵	Autumn rain	5.2766	1.51374	5.17021	1.65922	3.89583	1.60106	7.20833	0.988408	5.13043	1.6041	5.34783	1.87347	3.16667	1.34056	6.91667	1.01795	5.41667	1.44212	5	1.44463	4.625	1.52693	7.5	0.884652	秋雨绵绵	47	23	24	48	24	24	秋雨绵绵	32	39	秋	142.529	9	雨	172.54	8	绵	16.6896	11	绵	16.6896	11
1229	求才若渴	Thirst for talents	5.93617	1.20514	5.80851	1.62371	5.22449	1.86263	7.04082	1.38382	5.86957	1.39167	5.47826	1.70213	5.04	1.81384	6.56	1.41657	6	1.02151	6.125	1.51263	5.41667	1.93181	7.54167	1.17877	求才若渴	47	23	24	49	25	24	求才若渴	59	30	求	922	7	才	741.691	3	若	216.964	8	渴	37.6912	12
1230	求神拜佛	Pray to buddha for help	4.34906	1.28761	5.17925	1.33664	4.375	2.24675	7.33333	1.03827	4.24528	1.51791	5.20755	1.04437	5	2.10589	7.04167	1.08264	4.45283	1.01083	5.15094	1.58595	3.75	2.2506	7.625	0.923721	求神拜佛	106	53	53	48	24	24	求神拜佛	93	32	求	922	7	神	903.332	9	拜	106.179	9	佛	176.567	7
1235	曲曲弯弯	Bending; tortuous	4.68932	0.828761	4.74757	1.25024	4.66	1.39401	7.06	1.0184	4.67308	0.922936	4.78846	1.21003	4.34615	1.64784	6.96154	1.14824	4.70588	0.729222	4.70588	1.30068	5	0.978019	7.16667	0.868115	曲曲弯弯	103	52	51	50	26	24	曲曲弯弯	159	30	曲	282.409	6	曲	282.409	6	弯	41.9561	9	弯	41.9561	9
1236	曲曲折折	Winding	4.0625	1.34332	5.375	1.36249	4.44	1.59284	6.88	1.30368	4.375	1.40844	5.29167	1.48848	4.2	1.55456	6.4	1.35401	3.75	1.22474	5.45833	1.25036	4.68	1.62583	7.36	1.07548	曲曲折折	48	24	24	50	25	25	曲曲折折	347	26	曲	282.409	6	曲	282.409	6	折	161.256	7	折	161.256	7
1237	曲线救国	Save the nation by a devious path	5.38298	1.54009	5.68085	1.65643	4.92	1.90424	6.44	1.83125	4.91304	1.62125	5.78261	1.34693	4.38462	1.81278	6.23077	1.68066	5.83333	1.34056	5.58333	1.93181	5.5	1.86501	6.66667	1.99274	曲线救国	47	23	24	50	26	24	曲线救国	98	33	曲	282.409	6	线	755.686	8	救	200.889	11	国	9484.82	8
1239	去而复返	Go back	5.46809	1.34893	5.38298	1.83627	5.5	1.3527	6.66667	1.31008	5.41667	1.6129	5.54167	1.81729	5.16667	1.37261	6.58333	0.974308	5.52174	1.03877	5.21739	1.88189	5.83333	1.27404	6.75	1.59483	去而复返	47	24	23	48	24	24	去而复返	39	27	去	1621.28	5	而	2283.95	6	复	676.619	9	返	97.7849	7
1240	权衡轻重	Weigh up one thing against another	5.39394	0.711684	4.85859	1.27783	5.94231	1.52641	7.26923	0.972472	5.21277	0.413688	5.08511	0.974229	5.32143	1.61138	6.96429	1.0709	5.55769	0.872532	4.65385	1.48039	6.66667	1.0495	7.625	0.710939	权衡轻重	99	47	52	52	28	24	权衡轻重	103	40	权	1179.26	6	衡	55.694	16	轻	439.1	9	重	1984.12	9
1241	全场哗然	The audience uproar	4.17021	1.73605	6.12766	1.52682	4.04167	1.67533	7.1875	1.19674	4.47826	1.95098	5.95652	1.89445	3.91667	1.66594	6.91667	1.01795	3.875	1.48361	6.29167	1.08264	4.16667	1.711	7.45833	1.31807	全场哗然	47	23	24	48	24	24	全场哗然	19	33	全	2321.82	6	场	1805.19	6	哗	12.9507	9	然	1095.5	12
1242	全民皆兵	Turn every man into a soldier	5.86408	1.48224	6.06796	1.23877	3.71429	2.16025	6.71429	1.5411	6.40385	1.19245	6.11538	1.36703	2.88	1.78699	6.96	1.56738	5.31373	1.55551	6.01961	1.10436	4.58333	2.20507	6.45833	1.50302	全民皆兵	103	52	51	49	25	24	全民皆兵	98	27	全	2321.82	6	民	2137.66	5	皆	55.939	9	兵	551.831	7
1247	雀巢咖啡	Nescafe	5.51163	0.882963	5.02326	1.3538	6.18367	2.09835	7.53061	1.22648	5.28571	0.560612	5.28571	0.717137	4.91667	1.5299	6.95833	1.16018	5.72727	1.07711	4.77273	1.74388	7.4	1.84842	8.08	1.03763	雀巢咖啡	43	21	22	49	24	25	雀巢咖啡	97	41	雀	9.93703	11	巢	6.41647	11	咖	17.6946	8	啡	18.1879	11
1251	群雄逐鹿	All kinds of power struggle for one goal	5.53191	1.63987	6.17021	1.68522	4.38776	1.74184	6.26531	1.39606	5.65217	1.5258	6.21739	1.41282	4.20833	1.81729	6	1.35133	5.41667	1.76725	6.125	1.9407	4.56	1.68523	6.52	1.41774	群雄逐鹿	47	23	24	49	24	25	群雄逐鹿	164	46	群	482.108	13	雄	162.067	12	逐	115.973	10	鹿	20.8028	11
1253	热带雨林	Tropical rain forest	5.68085	1.21774	5.17021	1.55086	3.97872	1.70025	7.21277	1.28429	5.48	1.38804	5.32	1.43527	3.34783	1.69515	6.6087	1.07615	5.90909	0.971454	5	1.69031	4.58333	1.50121	7.79167	1.21509	热带雨林	47	25	22	47	23	24	热带雨林	1296	35	热	606.285	10	带	651.825	9	雨	172.54	8	林	572.211	8
1254	热泪夺眶	Burst into tears	5.8	1.3751	6.84444	1.1862	5.12766	2.12252	7.55319	0.904302	5.81818	1.50036	6.68182	1.21052	5.22727	2.44816	7.5	0.859125	5.78261	1.27766	7	1.16775	5.04	1.83666	7.6	0.957427	热泪夺眶	45	22	23	47	22	25	热泪夺眶	84	35	热	606.285	10	泪	87.0932	8	夺	146.877	6	眶	4.01387	11
1259	人非草木	A man is not a stalk of grass or a tree	5.17391	0.824738	5.19565	1.14736	4.84615	1.53884	7	1.52109	5.09091	0.683763	4.81818	1.18065	4.81481	1.56984	7.11111	1.18754	5.25	0.944089	5.54167	1.02062	4.88	1.53623	6.88	1.83303	人非草木	46	22	24	52	27	25	人非草木	74	23	人	10357.8	2	非	678.212	8	草	267.558	9	木	274.901	4
1260	人高马大	Big and tall	5.80435	1.31012	5.28261	1.64199	4.59184	1.82481	7.12245	1.30116	5.95833	0.907896	5.20833	1.58743	4.16	1.65025	6.84	1.28062	5.63636	1.64882	5.36364	1.7333	5.04167	1.92194	7.41667	1.28255	人高马大	46	24	22	49	25	24	人高马大	197	18	人	10357.8	2	高	2199.88	10	马	1026.99	3	大	6744.01	3
1261	人工受精	Artificial insemination	4.95192	0.688037	4.92308	1.45277	4.64706	2.05741	6.62745	1.75455	5.04	0.347586	4.88	1.20611	4.57692	1.90101	6.19231	1.83345	4.87037	0.891179	4.96296	1.65931	4.72	2.24574	7.08	1.57903	人工受精	104	50	54	51	26	25	人工受精	64	27	人	10357.8	2	工	3526.41	3	受	972.326	8	精	824.006	14
1264	人情冷暖	Men's feelings are changeable	4.86408	1.1803	5.28155	1.31669	4.73469	1.96612	7.42857	0.935414	5.2449	0.924901	5.22449	0.963183	4.79167	1.7932	7.25	0.944089	4.51852	1.28475	5.33333	1.57815	4.68	2.15484	7.6	0.912871	人情冷暖	103	49	54	49	24	25	人情冷暖	71	33	人	10357.8	2	情	1729.84	11	冷	210.839	7	暖	69.0162	13
1266	人生苦短	Life is too short	4.09091	1.25417	5.63636	1.1016	3.25	1.48037	7.33333	0.996448	4.19048	0.749603	5.2381	1.04426	3.70833	1.65448	6.91667	0.829702	4	1.59545	6	1.04447	2.79167	1.14129	7.75	0.989071	人生苦短	44	21	23	48	24	24	人生苦短	82	27	人	10357.8	2	生	4823.71	5	苦	332.425	8	短	224.705	12
1268	人小鬼大	A little man	5.51429	1.50713	5.7619	1.31941	5.22917	1.54699	7.3125	0.854432	5.05769	1.43368	5.76923	1.24641	4.83333	1.57885	7.29167	0.80645	5.96226	1.45394	5.75472	1.39925	5.625	1.43898	7.33333	0.916831	人小鬼大	105	52	53	48	24	24	人小鬼大	24	17	人	10357.8	2	小	2135.97	3	鬼	87.8431	9	大	6744.01	3
1274	认知科学	Cognitive science	5.31818	0.770766	4.29545	1.48762	4.74	1.90392	6.68	1.63433	5.52381	0.872872	4.71429	1.23056	4.56	1.89473	6.76	1.12842	5.13043	0.625543	3.91304	1.62125	4.92	1.93477	6.6	2.04124	认知科学	44	21	23	50	25	25	认知科学	47	29	认	1074.87	4	知	1298.23	8	科	1642.42	9	学	4035.57	8
1275	任其自流	Leave events to take their own course	4.17778	1.33636	5.06667	1.19469	4.46154	1.51414	6.78846	1.41887	4	1.5667	5.13043	1.39167	4.18519	1.41522	6.81481	1.00142	4.36364	1.0486	5	0.9759	4.76	1.5885	6.76	1.78606	任其自流	45	23	22	52	27	25	任其自流	55	30	任	1254.12	6	其	1873.8	8	自	3316.74	6	流	948.45	10
1277	日理万机	Attend to numerous affairs everyday	5.95652	1.24644	5.32609	1.86255	5.28	2.19499	6.92	1.60153	6.5	1.25109	5.875	1.82525	5	2.17945	6.8	1.65831	5.36364	0.953463	4.72727	1.7507	5.56	2.21886	7.04	1.56738	日理万机	46	24	22	50	25	25	日理万机	319	24	日	3252.04	4	理	2917.08	11	万	781.635	3	机	2206.73	6
1278	日上三竿	The sun is three poles high	4.7234	1.03634	4.87234	1.22682	4.18367	1.72812	6.55102	1.62097	5.08696	0.733178	4.78261	1.24157	3.64	1.72916	6.32	1.40594	4.375	1.1726	4.95833	1.23285	4.75	1.56733	6.79167	1.81729	日上三竿	47	23	24	49	25	24	日上三竿	69	19	日	3252.04	4	上	5278.79	3	三	1255.48	3	竿	9.03069	9
1279	日以继夜	Day and night	5.17143	1.34062	5.69524	1.20195	5.47917	1.70093	7.22917	1.11545	5.5283	1.15365	5.66038	1.27012	5.41667	1.99819	7.04167	1.16018	4.80769	1.42854	5.73077	1.13958	5.54167	1.38247	7.41667	1.05981	日以继夜	105	53	52	48	24	24	日以继夜	303	26	日	3252.04	4	以	4459.97	4	继	359.103	10	夜	266.196	8
1280	日有所思	People think over things in the daytime.	4.91111	0.949216	5.24444	1.35102	5.375	1.9529	7.52083	0.945079	4.68182	0.945484	5.27273	1.24142	5.26087	1.88818	7.21739	0.671262	5.13043	0.919701	5.21739	1.47576	5.48	2.04369	7.8	1.08012	日有所思	45	22	23	48	23	25	日有所思	59	27	日	3252.04	4	有	8648.03	6	所	2259.17	8	思	1002.68	9
1284	柔声柔气	Soft voice and soft breath	5.23404	1.49219	4.82979	1.67227	6.16667	1.43413	6.79167	1.62374	5.26087	1.13688	4.82609	1.82538	6.13043	1.48643	7	1.2792	5.20833	1.7932	4.83333	1.55106	6.2	1.41421	6.6	1.89297	柔声柔气	47	23	24	48	23	25	柔声柔气	21	29	柔	34.3639	9	声	768.616	7	柔	34.3639	9	气	1139.89	4
1285	柔声细气	Soft sound and fine gas	5.24444	1.38425	5.11111	1.28315	5.93878	1.72492	7.32653	1.04857	5.38095	1.02353	5.2381	1.04426	5.76	1.80924	7.04	0.734847	5.125	1.6501	5	1.47442	6.125	1.6501	7.625	1.24455	柔声细气	45	21	24	49	25	24	柔声细气	24	28	柔	34.3639	9	声	768.616	7	细	404.615	8	气	1139.89	4
1286	肉眼凡胎	A shortsighted and good-for-nothing person	4.58696	1.06617	5.17391	1.06049	4.22917	1.56068	6.58333	1.63516	4.52174	1.27456	5.34783	0.982052	3.875	1.454	6.20833	1.74404	4.65217	0.831685	5	1.12815	4.58333	1.6129	6.95833	1.45898	肉眼凡胎	46	23	23	48	24	24	肉眼凡胎	42	29	肉	163.063	6	眼	606.508	11	凡	124.441	3	胎	47.4336	9
1289	如饥如渴	Hunger and thirst for	4.99029	1.41764	6.00971	1.0337	4.84615	1.77548	6.98077	1.48839	5.25	1.54507	5.90385	1.10719	4.66667	1.77591	7.07407	1.26873	4.72549	1.23415	6.11765	0.951779	5.04	1.79072	6.88	1.71561	如饥如渴	103	52	51	52	27	25	如饥如渴	55	29	如	1955.83	6	饥	12.4111	5	如	1955.83	6	渴	37.6912	12
1291	如牛负重	Toil like a beast of burden	4.10417	1.58771	5.45833	1.41359	3.94231	1.64988	6.34615	1.64358	4.2	1.80278	5.76	1.3626	4.14286	1.55669	6.25	1.37773	4	1.3484	5.13043	1.42396	3.70833	1.75646	6.45833	1.93321	如牛负重	48	25	23	52	28	24	如牛负重	24	25	如	1955.83	6	牛	163.192	4	负	398.8	6	重	1984.12	9
1293	软式网球	Lawn tennis	5.09524	0.72615	4.54762	1.48492	5.56522	1.34416	5.8913	2.0136	5.15	0.366348	5	1.02598	5.04762	0.589592	5.2381	1.67047	5.04545	0.950051	4.13636	1.72642	6	1.63299	6.44	2.14243	软式网球	42	20	22	46	21	25	软式网球	91	31	软	172.047	8	式	1004.53	6	网	786.396	6	球	607.207	11
1296	若即若离	Be neither friendly nor aloof	4.38298	1.03321	5.04255	1.12206	4.72917	1.71029	6.89583	1.58771	4.41667	0.928611	5.125	0.797414	5.44	1.55671	6.36	1.8	4.34783	1.15242	4.95652	1.39734	3.95652	1.55149	7.47826	1.08165	若即若离	47	24	23	48	25	23	若即若离	267	33	若	216.964	8	即	632.955	7	若	216.964	8	离	486.518	10
1297	三朝元老	Three dynasties	5.64583	1.17581	5.3125	1.81197	3.98	1.84601	6.76	1.61068	5.48	1.38804	5.68	1.37598	3.26923	1.73338	6.88462	1.39505	5.82609	0.886883	4.91304	2.15139	4.75	1.67462	6.625	1.83712	三朝元老	48	25	23	50	26	24	三朝元老	74	25	三	1255.48	3	朝	333.499	12	元	850.749	4	老	1102.08	6
1298	三寸金莲	Three-inch “golden lotuses”--woman's bound feet in feudal age	4.67391	1.49152	5.17391	1.27025	4.34615	1.75884	6.57692	1.68437	4.63636	0.953463	4.77273	0.869144	4.55556	1.67179	6.62963	1.66752	4.70833	1.87615	5.54167	1.47381	4.12	1.85562	6.52	1.73494	三寸金莲	46	22	24	52	27	25	三寸金莲	106	24	三	1255.48	3	寸	44.8303	3	金	1155.2	8	莲	36.0268	10
1299	三宫六院	Emperor's harem	4.4486	1.53717	5.28972	1.47948	4.40816	1.8475	6.34694	1.86582	4.03704	1.34533	5.07407	1.31539	3.8	1.68325	6.08	2.17792	4.86792	1.61766	5.50943	1.61272	5.04167	1.82921	6.625	1.46888	三宫六院	107	54	53	49	25	24	三宫六院	52	25	三	1255.48	3	宫	153.159	9	六	288.051	4	院	1033.27	9
1300	三起三落	Three ups and three downs	4.24444	1.20897	5.82222	1.35326	4.29167	1.93466	6.72917	1.6978	4.36364	1.17698	5.63636	0.726731	4.41667	1.88626	6.41667	1.24819	4.13043	1.25424	6	1.7581	4.16667	2.01444	7.04167	2.0319	三起三落	45	22	23	48	24	24	三起三落	82	28	三	1255.48	3	起	2047.96	10	三	1255.48	3	落	422.942	12
1301	三三两两	By twos and threes	4.56818	0.818329	4.59091	1.43573	4.9375	1.13749	6.875	1.42359	4.9	0.307794	5	0	4.58333	1.24819	6.95833	1.08264	4.29167	0.999094	4.25	1.89393	5.29167	0.907896	6.79167	1.71893	三三两两	44	20	24	48	24	24	三三两两	760	20	三	1255.48	3	三	1255.48	3	两	1025.77	7	两	1025.77	7
1303	散兵游勇	Stragglers and disbanded soldiers	4.2766	1.55622	4.80851	1.72751	4.61702	1.48255	5.74468	2.14139	3.58333	1.17646	4.54167	1.41357	4	1.4771	5.73913	1.62976	5	1.59545	5.08696	1.99802	5.20833	1.25036	5.75	2.57496	散兵游勇	47	24	23	47	23	24	散兵游勇	291	40	散	236.394	12	兵	551.831	7	游	500.564	12	勇	126.994	9
1309	山高水低	Unexpected misfortune	5.625	1.02366	4.64583	1.40651	3.76596	1.74721	6.93617	1.1685	5.58333	1.01795	4.75	1.35935	3.58333	1.88626	6.95833	0.999094	5.66667	1.0495	4.54167	1.47381	3.95652	1.60902	6.91304	1.34547	山高水低	48	24	24	47	24	23	山高水低	20	24	山	1013.65	3	高	2199.88	10	水	1535.76	4	低	394.867	7
1311	山南海北	The four corners of the land	5.3617	1.13109	5.21277	1.61429	4.12245	1.60251	6.79592	1.3991	5.29167	1.08264	5.25	1.03209	3.875	1.80127	6.83333	1.09014	5.43478	1.19947	5.17391	2.08135	4.36	1.38082	6.76	1.66533	山南海北	47	24	23	49	24	25	山南海北	60	27	山	1013.65	3	南	1076.94	9	海	1315.95	10	北	1945.54	5
1314	闪闪烁烁	Flashing	5.30476	1.26433	5.14286	1.41032	5.23404	1.3707	6.91489	1.23058	5.18868	1.27183	5.26415	1.21134	5.30435	1.4596	6.6087	1.19617	5.42308	1.25786	5.01923	1.59029	5.16667	1.30773	7.20833	1.21509	闪闪烁烁	105	53	52	47	23	24	闪闪烁烁	271	28	闪	85.2078	5	闪	85.2078	5	烁	6.41579	9	烁	6.41579	9
1316	善善恶恶	Love the good and shun the evil	4.9898	0.365945	4.58163	1.12994	4.95652	1.6594	6.95652	1.22849	4.91837	0.39983	4.73469	0.974156	4.56522	1.67403	6.56522	1.03687	5.06122	0.316765	4.42857	1.25831	5.34783	1.58426	7.34783	1.30065	善善恶恶	98	49	49	46	23	23	善善恶恶	34	44	善	318.773	12	善	318.773	12	恶	188.285	10	恶	188.285	10
1322	上山下海	Go up and down the sea	5.14894	1.06278	5.57447	1.39478	5.26531	1.97669	6.42857	1.63299	5.48	1.15902	5.56	0.820569	4.91667	2.2247	6.25	1.51083	4.77273	0.81251	5.59091	1.86851	5.6	1.68325	6.6	1.75594	上山下海	47	25	22	49	24	25	上山下海	21	19	上	5278.79	3	山	1013.65	3	下	2891.04	3	海	1315.95	10
1323	尚方宝剑	Imperial sword	5.90099	1.10005	5.91089	1.24979	3.92	2.45648	6.82	1.92396	5.75472	1.19141	5.67925	1.31227	3.30769	2.22296	6.73077	1.63848	6.0625	0.976451	6.16667	1.13613	4.58333	2.56933	6.91667	2.2247	尚方宝剑	101	53	48	50	26	24	尚方宝剑	270	29	尚	219.028	8	方	3269.88	4	宝	221.11	8	剑	67.2818	9
1324	烧香拜佛	Burn incense and worship buddha	4.38095	1.25101	4.86667	1.60568	4.90385	2.08881	7.01923	1.63887	4.33962	1.45369	4.77358	1.62483	5	2.18386	7.22222	1.05003	4.42308	1.01646	4.96154	1.59609	4.8	2.02073	6.8	2.10159	烧香拜佛	105	53	52	52	27	25	烧香拜佛	92	35	烧	118.51	10	香	347.807	9	拜	106.179	9	佛	176.567	7
1325	少儿不宜	Not another teen movie	4.42222	1.19637	5.08889	1.12457	4.98	2.01515	7.4	1.16058	4.59091	0.73414	5.04545	0.575473	4.64	2.05913	7.12	1.20139	4.26087	1.5141	5.13043	1.48643	5.32	1.95192	7.68	1.06927	少儿不宜	45	22	23	50	25	25	少儿不宜	71	18	少	1064	4	儿	905.272	2	不	9822.27	4	宜	140.631	8
1326	舌剑唇枪	Harsh words like sword and gun	4.43478	1.61455	6.56522	1.00338	4.95833	1.59732	7.20833	1.18426	4.33333	1.76109	6.33333	0.868115	5.125	1.67624	6.79167	1.31807	4.54545	1.47122	6.81818	1.09702	4.79167	1.53167	7.625	0.875388	舌剑唇枪	46	24	22	48	24	24	舌剑唇枪	36	33	舌	13.6236	6	剑	67.2818	9	唇	30.6575	10	枪	137.611	8
1327	舍本求末	Concentrate on trifles and neglect essentials	4.1087	1.30347	5.54348	1.27726	4.95918	1.91441	6.61224	1.57872	4.54545	1.3355	5.27273	1.24142	5.24	2.02649	6.12	1.66633	3.70833	1.16018	5.79167	1.28466	4.66667	1.78561	7.125	1.32902	舍本求末	46	22	24	49	25	24	舍本求末	38	25	舍	87.4981	8	本	2895.78	5	求	922	7	末	165.304	5
1330	舍死忘生	Risk one's life	5.3913	1.92617	6.6087	1.66638	5.42	2.16738	6.94	1.62141	5.78261	2.04398	6.21739	1.85758	5.6	2.43242	7.12	1.16619	5	1.7581	7	1.3817	5.24	1.89912	6.76	1.98494	舍死忘生	46	23	23	50	25	25	舍死忘生	23	26	舍	87.4981	8	死	481.523	6	忘	120.957	7	生	4823.71	5
1331	社会大学	Community college	5.17172	0.700443	5.0202	1.28555	4.26415	1.57078	6.66038	1.81811	5.29787	0.656569	5.14894	0.955049	4.03571	1.5982	7.10714	1.22744	5.05769	0.725271	4.90385	1.52444	4.52	1.5308	6.16	2.2301	社会大学	99	47	52	53	28	25	社会大学	105	24	社	1983.49	7	会	5204.67	6	大	6744.01	3	学	4035.57	8
1336	身在此山	In this mountain	5.2	0.660578	4.64444	1.35102	4.1875	1.59329	6.875	1.23124	5.09091	0.294245	4.63636	1.29267	4.66667	1.76109	6.79167	1.17877	5.30435	0.87567	4.65217	1.43364	3.70833	1.26763	6.95833	1.30148	身在此山	45	22	23	48	24	24	身在此山	96	22	身	1129.97	7	在	6592.4	6	此	1536.3	6	山	1013.65	3
1338	深入虎穴	Deep in danger	4.78723	1.8408	6.68085	1.795	4.5	2.21544	7.3	1.19949	5.20833	1.8877	6.20833	1.81729	4.76923	2.04563	7.19231	1.20064	4.34783	1.72175	7.17391	1.6693	4.20833	2.39527	7.41667	1.21285	深入虎穴	47	24	23	50	26	24	深入虎穴	65	26	深	665.861	11	入	1407.48	2	虎	76.5574	8	穴	30.6378	5
1339	深山幽谷	Deep valley	5.90654	1.32133	4.94393	1.7848	3.79167	1.85608	7.0625	1.29494	5.64151	1.17824	5.16981	1.28206	3.54167	1.61458	6.75	1.18872	6.16667	1.41087	4.72222	2.15806	4.04167	2.07426	7.375	1.34528	深山幽谷	107	53	54	48	24	24	深山幽谷	44	30	深	665.861	11	山	1013.65	3	幽	22.6455	9	谷	41.4431	7
1343	神妙莫测	So subtle as to be difficult to guess what comes next	5.82609	1.40324	5.67391	1.68726	4.04082	1.77904	6.57143	1.67083	5.73913	1.71139	5.56522	1.67403	4.08	1.95619	6.2	1.68325	5.91304	1.04067	5.78261	1.73091	4	1.61515	6.95833	1.60106	神妙莫测	46	23	23	49	25	24	神妙莫测	37	35	神	903.332	9	妙	86.3012	7	莫	156.478	10	测	304.912	9
1344	神神秘秘	Mystery	4.37143	0.943165	5.39048	1.05151	4.70833	1.57045	7.10417	1.20706	4.16981	0.935123	5.30189	1.03003	4.41667	1.47196	6.75	1.45213	4.57692	0.914934	5.48077	1.0754	5	1.64184	7.45833	0.779028	神神秘秘	105	53	52	48	24	24	神神秘秘	71	38	神	903.332	9	神	903.332	9	秘	110.689	10	秘	110.689	10
1346	生产实习	Production practice	5.13636	0.734243	5.13636	1.39085	4.72917	1.72268	7.02083	1.45119	5.35	0.67082	5.4	0.753937	4.17391	1.69631	6.78261	1.16605	4.95833	0.750604	4.91667	1.74248	5.24	1.61452	7.24	1.66533	生产实习	44	20	24	48	23	25	生产实习	66	22	生	4823.71	5	产	3213.45	6	实	2543.98	8	习	198.402	3
1349	生生世世	Life after life	5.71111	1.05792	5.35556	1.62586	4.25	1.88499	6.97917	1.40651	5.45455	0.670982	5.36364	0.726731	4.30435	1.71715	6.78261	0.998022	5.95652	1.29609	5.34783	2.18692	4.2	2.06155	7.16	1.7	生生世世	45	22	23	48	23	25	生生世世	99	20	生	4823.71	5	生	4823.71	5	世	1564.19	5	世	1564.19	5
1351	生物学界	Biological community	5.09302	0.293903	4.32558	1.56936	4.06122	1.44926	7	1.5	5.13636	0.35125	5.13636	0.35125	3.875	1.56906	6.54167	1.35066	5.04762	0.218218	3.47619	1.8873	4.24	1.33167	7.44	1.52971	生物学界	43	22	21	49	24	25	生物学界	106	30	生	4823.71	5	物	1894.3	8	学	4035.57	8	界	1084.58	9
1353	生育高峰	Birth peak	4.65116	0.752258	5.44186	1.20124	4.17308	1.43788	6.34615	1.93912	4.80952	0.601585	5.04762	1.24403	4.07143	1.69812	6.85714	1.29713	4.5	0.859125	5.81818	1.05272	4.29167	1.08264	5.75	2.382	生育高峰	43	21	22	52	28	24	生育高峰	92	33	生	4823.71	5	育	782.474	8	高	2199.88	10	峰	95.9205	10
1356	声势显赫	Eminence	5.53333	1.52585	5.84762	1.43969	4.47917	1.84494	6.70833	1.25407	5.29412	1.6161	5.52941	1.57928	4.25	1.64845	6.45833	0.977093	5.75926	1.41335	6.14815	1.23483	4.70833	2.0319	6.95833	1.45898	声势显赫	105	51	54	48	24	24	声势显赫	31	38	声	768.616	7	势	267.427	8	显	471.508	9	赫	20.6116	14
1361	师出无名	Send the army out without a righteous cause	4.25	0.956501	5	1.28824	4.52083	1.54355	6.8125	1.55271	4.2	1.08012	4.96	1.33791	4.2	1.5	6.12	1.71561	4.30435	0.822125	5.04348	1.26053	4.86957	1.54638	7.56522	0.895752	师出无名	48	25	23	48	25	23	师出无名	84	21	师	662.888	6	出	4757.26	5	无	1828.92	4	名	1361.14	6
1362	师道尊严	The teacher's dignity	5.77551	1.32705	5.22449	1.54469	4.65957	2.16972	7	1.21584	6.11538	1.27521	5.65385	1.44062	4.83333	2.29682	6.91667	1.17646	5.3913	1.3052	4.73913	1.54383	4.47826	2.06419	7.08696	1.27611	师道尊严	49	26	23	47	24	23	师道尊严	75	37	师	662.888	6	道	2174.2	12	尊	122.77	12	严	470.979	7
1363	十二属相	Twelve zodiac	5.11364	0.321038	4.15909	1.50878	4.08163	2.09997	7.79592	1.11765	5	0	4.80952	0.813575	3.76923	2.06509	7.69231	0.970329	5.21739	0.421741	3.56522	1.7536	4.43478	2.1283	7.91304	1.27611	十二属相	44	21	23	49	26	23	十二属相	44	25	十	1226.38	2	二	1132.69	2	属	398.146	12	相	1565.14	9
1364	十年寒窗	Persevere ten years in one's studies in spite of hardships	5.48936	1.41225	6.51064	1.54459	4.67347	2.33084	7.5102	1.02312	5.56522	1.34252	6.26087	1.35571	5	1.97814	7.125	0.899879	5.41667	1.50121	6.75	1.70038	4.36	2.62805	7.88	1.01325	十年寒窗	47	23	24	49	24	25	十年寒窗	87	32	十	1226.38	2	年	5151.12	6	寒	91.5453	12	窗	124.487	12
1367	十指连心	The nerves of the fingertips are linked with the heart	5.23301	1.16488	5.59223	1.27138	4.07843	1.9167	7.19608	1.26522	5.20755	1.26123	5.73585	1.14608	3.88462	1.84015	7.11538	1.14287	5.26	1.06541	5.44	1.38741	4.28	2.0108	7.28	1.4	十指连心	103	53	50	51	26	25	十指连心	35	22	十	1226.38	2	指	964.138	9	连	505.817	7	心	2318.57	4
1368	时不可失	There is no time to lose	5.66667	1.24342	5.97917	1.27979	5.4898	2.05267	6.91837	1.60516	5.84	1.31276	5.92	1.35154	5.79167	1.74404	6.41667	1.79169	5.47826	1.16266	6.04348	1.22394	5.2	2.3094	7.4	1.25831	时不可失	48	25	23	49	24	25	时不可失	47	21	时	4274.09	7	不	9822.27	4	可	3245.08	5	失	590.556	5
1369	时紧时松	Tight or loose	4.91489	1.08005	4.85106	1.62827	5.85417	1.44384	6.97917	1.08156	4.83333	0.868115	5.375	0.646899	5.625	1.34528	6.79167	0.977093	5	1.2792	4.30435	2.11992	6.08333	1.5299	7.16667	1.16718	时紧时松	47	24	23	48	24	24	时紧时松	63	32	时	4274.09	7	紧	354.228	10	时	4274.09	7	松	189.836	8
1370	时起时伏	Rise and fall in a wavelike manner	4.66346	0.981485	5.17308	1.19418	4.5	1.68851	7.02083	1.17581	4.84314	0.73137	5.05882	0.946821	4.84	1.51877	6.68	1.10755	4.49057	1.15397	5.28302	1.39197	4.13043	1.8167	7.3913	1.15755	时起时伏	104	51	53	48	25	23	时起时伏	99	30	时	4274.09	7	起	2047.96	10	时	4274.09	7	伏	75.6933	6
1371	时有时无	Come and go; sometimes	4.44444	0.918387	4.93333	1.2685	4.22449	1.47571	6.83673	1.17875	4.72727	0.550482	5.18182	0.58849	4.54167	1.69344	6.33333	1.12932	4.17391	1.11405	4.69565	1.66337	3.92	1.18743	7.32	1.02956	时有时无	45	22	23	49	24	25	时有时无	90	24	时	4274.09	7	有	8648.03	6	时	4274.09	7	无	1828.92	4
1372	识破机关	Organ of insight	5.95745	1.503	6.10638	1.54967	6.06	1.59604	7.1	1.41782	5.86957	1.35862	5.86957	1.6598	5.56	1.63503	6.84	1.21381	6.04167	1.65448	6.33333	1.43456	6.56	1.41657	7.36	1.57797	识破机关	47	23	24	50	25	25	识破机关	17	29	识	685.949	7	破	408.047	10	机	2206.73	6	关	2202.44	6
1374	实报实销	Reimbursement	5.30435	1.02999	4.78261	1.50426	4.90385	2.0794	6.90385	1.6599	5.27273	0.550482	5.27273	0.7025	4.33333	1.86052	7.37037	0.92604	5.33333	1.34056	4.33333	1.88049	5.52	2.16256	6.4	2.10159	实报实销	46	22	24	52	27	25	实报实销	90	35	实	2543.98	8	报	2394.79	7	实	2543.98	8	销	404.836	12
1377	食草动物	Herbivore	5.07317	0.565254	4.70732	1.26972	4.92	1.93612	7.14	1.34027	5.1	0.307794	5.1	0.307794	3.96	1.69509	6.84	1.31276	5.04762	0.740013	4.33333	1.68325	5.88	1.69115	7.44	1.32539	食草动物	41	20	21	50	25	25	食草动物	106	32	食	423.122	9	草	267.558	9	动	3207.89	6	物	1894.3	8
1379	士别三日	Not seen for three days	5.53922	0.950993	5.60784	1.16174	5.08511	1.47191	6.95745	1.35064	5.30769	0.805337	5.40385	1.01479	4.69565	1.39593	6.21739	1.24157	5.78	1.03589	5.82	1.27279	5.45833	1.47381	7.66667	1.0495	士别三日	102	52	50	47	23	24	士别三日	64	17	士	368.569	3	别	1182.98	7	三	1255.48	3	日	3252.04	4
1383	市长热线	Mayor hotline	5.2093	1.16615	5.39535	1.5757	4.46939	2.01145	6.59184	1.90305	5.2381	0.538958	5.28571	1.18924	3.70833	1.80529	6.58333	1.95419	5.18182	1.56255	5.5	1.89611	5.2	1.95789	6.6	1.89297	市长热线	43	21	22	49	24	25	市长热线	56	27	市	2160.53	5	长	2117.13	4	热	606.285	10	线	755.686	8
1385	似真似假	Hyper real and profoundly fake	4.2449	1.07103	5	1.25831	4.77083	1.43274	6.66667	1.47797	4.2	1.04083	5	1.04083	4.92	1.55242	6.32	1.46401	4.29167	1.12208	5	1.47442	4.6087	1.3052	7.04348	1.4295	似真似假	49	25	24	48	25	23	似真似假	17	33	似	351.708	6	真	869.064	10	似	351.708	6	假	289.79	11
1388	事关大局	Related to the overall situation	5.52174	1.24256	5.95652	1.29883	3.89796	1.78238	7.18367	0.905388	5.59091	0.959121	5.86364	0.990212	3.92	1.73013	6.84	0.898146	5.45833	1.47381	6.04167	1.5458	3.875	1.87228	7.54167	0.779028	事关大局	46	22	24	49	25	24	事关大局	102	24	事	2624.46	8	关	2202.44	6	大	6744.01	3	局	650.051	7
1389	事关紧要	Concerning	4.97826	1.22	6.69565	1.2801	4.58	2.11978	7.08	1.2752	4.875	1.32902	6.25	1.25974	4.52	2.0232	6.92	1.11505	5.09091	1.1088	7.18182	1.13961	4.64	2.25241	7.24	1.42244	事关紧要	46	24	22	50	25	25	事关紧要	14	33	事	2624.46	8	关	2202.44	6	紧	354.228	10	要	3871.32	9
1390	事预则立	Prepare well in advance, and things will work out	5.95918	1.24095	5.32653	1.34455	5.71429	1.45774	5.77551	1.97131	6.04	0.978093	5.12	1.48099	5.45833	1.25036	5.83333	1.40393	5.875	1.48361	5.54167	1.17877	5.96	1.61967	5.72	2.42418	事预则立	49	25	24	49	24	25	事预则立	62	29	事	2624.46	8	预	180.893	10	则	634.108	6	立	1499.57	5
1397	是非成败	Whether or not it is a success or failure	5.02	0.512076	4.93	1.12146	4.8125	1.78238	7	1.30466	5.0625	0.380719	5.125	0.530957	4.95652	1.3307	6.34783	1.36877	4.98077	0.610059	4.75	1.45353	4.68	2.13542	7.6	0.912871	是非成败	100	48	52	48	23	25	是非成败	41	31	是	9027.33	9	非	678.212	8	成	3751.08	6	败	206.25	8
1400	适逢其会	Be lucky enough to be there at the time	5.5	1.09036	5.54348	1.40959	4.82979	1.06972	5.61702	1.87145	5.3913	1.33958	5.34783	1.49571	4.65217	1.26522	5.91304	1.31125	5.6087	0.782718	5.73913	1.32175	5	0.834058	5.33333	2.27781	适逢其会	46	23	23	47	23	24	适逢其会	41	33	适	213.177	9	逢	34.2502	10	其	1873.8	8	会	5204.67	6
1406	守株待兔	Wait for gains without pains	4.15556	1.31349	5.4	1.21356	5.02	2.06516	7.04	1.293	4.71429	1.0556	5.38095	1.02353	5.16	2.19241	6.88	1.20139	3.66667	1.34056	5.41667	1.38051	4.88	1.96469	7.2	1.38444	守株待兔	45	21	24	50	25	25	守株待兔	302	33	守	239.788	6	株	20.9131	10	待	326.983	9	兔	15.9752	8
1407	首尾相应	Head and tail corresponding with each other	5.7234	1.03634	4.95745	1.3981	5.48	1.41767	7.02	1.33233	5.79167	1.10253	5.5	1.06322	4.8	1.32288	6.48	1.32665	5.65217	0.982052	4.3913	1.49967	6.16	1.17898	7.56	1.12101	首尾相应	47	24	23	50	25	25	首尾相应	34	32	首	690.289	9	尾	77.1902	7	相	1565.14	9	应	1411	7
1409	售票大厅	Ticket hall	5	0.872872	5.13953	1.05968	4.44	1.57998	7.54	1.23239	5	0	4.85	0.933302	4.37037	1.66752	7.07407	1.20658	5	1.20605	5.3913	1.11759	4.52174	1.50362	8.08696	1.04067	售票大厅	43	20	23	50	27	23	售票大厅	90	29	售	311.127	11	票	277.388	11	大	6744.01	3	厅	151.881	4
1411	书归正传	Turn back to the topic	5.64773	0.985827	4.54545	1.5319	5.0625	1.60327	6.60417	1.34859	5.52174	1.08165	4.95652	1.58051	4.875	1.77697	6.875	0.679674	5.78571	0.874234	4.09524	1.37495	5.25	1.42188	6.33333	1.76109	书归正传	44	23	21	48	24	24	书归正传	42	20	书	1208.87	4	归	213.659	5	正	1497.95	5	传	864.783	6
1412	书生之见	Impractical view of a bookish person	4.14583	1.22021	5.10417	1.64044	4.83673	1.50481	6.42857	1.35401	4.25	0.944089	5.375	1.05552	4.125	1.454	6.29167	1.08264	4.04167	1.45898	4.83333	2.05715	5.52	1.22882	6.56	1.58325	书生之见	48	24	24	49	24	25	书生之见	59	15	书	1208.87	4	生	4823.71	5	之	2500.29	2	见	1255.38	4
1413	叔伯兄弟	Paternal cousins	5.32039	0.730479	4.82524	1.48474	4.375	1.7939	7.58333	1.0883	5.41176	0.697896	5.03922	0.999215	4.04	1.88149	7.52	1.1225	5.23077	0.757068	4.61538	1.82739	4.73913	1.65742	7.65217	1.07063	叔伯兄弟	103	51	52	48	25	23	叔伯兄弟	66	27	叔	48.3617	8	伯	182.029	7	兄	119.727	5	弟	196.76	7
1414	梳洗打扮	Grooming	5.7234	0.901741	4.61702	1.67531	6.54	1.7404	7.52	1.07362	5.84	1.06771	4.84	1.72434	6.32	1.90875	7.4	1.04083	5.59091	0.666125	4.36364	1.61968	6.76	1.56205	7.64	1.11355	梳洗打扮	47	25	22	50	25	25	梳洗打扮	105	32	梳	15.1131	11	洗	138.54	9	打	847.707	5	扮	45.8883	7
1418	树大根深	A big tree strikes roots deeply	5.65957	1.37171	5.34043	1.748	4.20833	1.92363	6.95833	1.07106	5.91304	1.04067	5.04348	1.91829	3.91667	1.81579	6.79167	1.10253	5.41667	1.6129	5.625	1.55515	4.5	2.02162	7.125	1.03472	树大根深	47	23	24	48	24	24	树大根深	7	33	树	259.686	9	大	6744.01	3	根	669.907	10	深	665.861	11
1420	数见不鲜	Encountered with many times	5.04255	0.85865	4.88298	1.41119	4.76923	1.55444	6.71154	1.63703	5.16667	0.816497	5	1.17954	4.40741	1.55066	6.40741	1.67008	4.91304	0.900154	4.76087	1.63672	5.16	1.49108	7.04	1.56738	数见不鲜	47	24	23	52	27	25	数见不鲜	53	35	数	1155.01	13	见	1255.38	4	不	9822.27	4	鲜	209.655	14
1430	水中捞月	Fish for the moon in the water	4.8	1.28982	5.42222	1.25207	4.11765	1.51851	6.76471	1.37968	4.57143	1.32557	5.57143	1.02817	4.23077	1.83973	6.69231	1.22537	5	1.25109	5.29167	1.42887	4	1.11803	6.84	1.54596	水中捞月	45	21	24	51	26	25	水中捞月	39	22	水	1535.76	4	中	7314.64	4	捞	19.2392	10	月	1839.86	4
1434	说古道今	Discourse at random of things past and present	5.8125	0.866793	4.95833	1.61058	5.77083	1.60106	6.8125	1.42405	5.83333	1.00722	5.375	1.24455	5.5	1.71945	6.70833	1.33447	5.79167	0.72106	4.54167	1.84106	6.04167	1.45898	6.91667	1.5299	说古道今	48	24	24	48	24	24	说古道今	25	30	说	2761.37	9	古	540.629	5	道	2174.2	12	今	1012.21	4
1436	私定终身	Pledge to marry without parental permission	5.80488	1.6766	6.34146	1.42495	5.86047	2.37629	7.27907	1.41968	5.09091	1.37699	5.77273	0.972567	5.95652	2.43979	7.13043	1.05763	6.63158	1.64014	7	1.59861	5.75	2.35919	7.45	1.76143	私定终身	41	22	19	43	23	20	私定终身	55	26	私	224.845	7	订	183.387	4	终	386.994	8	身	1129.97	7
1441	死得其所	It is a worthy death	5.87755	1.86673	5.87755	1.73964	5.2	1.72615	7.18	1.32002	6.68	1.34536	5.8	2.04124	4.76923	1.79572	7.11538	1.03255	5.04167	1.98865	5.95833	1.39811	5.66667	1.55106	7.25	1.59483	死得其所	49	25	24	50	26	24	死得其所	92	33	死	481.523	6	得	2822.14	11	其	1873.8	8	所	2259.17	8
1442	死里求生	Struggle in a desperate or hopeless situation for survival	5.57944	1.93302	6.59813	1.3795	4.71429	2.19848	6.97959	1.52055	5.75472	1.97002	6.32075	1.4777	5.625	1.92946	6.83333	1.46456	5.40741	1.89854	6.87037	1.2293	3.84	2.11503	7.12	1.58955	死里求生	107	53	54	49	24	25	死里求生	66	25	死	481.523	6	里	2015.7	7	求	922	7	生	4823.71	5
1446	死心塌地	Commit oneself desperately	5.60976	1.9089	5.73171	1.65868	5.69565	2.00964	7.5	1.0274	4.86364	1.85922	5.36364	1.25529	6	1.90693	7.17391	0.936734	6.47368	1.61136	6.15789	1.97943	5.3913	2.10495	7.82609	1.02922	死心塌地	41	22	19	46	23	23	死心塌地	566	29	死	481.523	6	心	2318.57	4	塌	15.5833	13	地	4442.5	6
1448	四大皆空	(in buddhism) all the four elements (earth, water, fire and air of which the world is made) are void	4.76087	1.15825	4.26087	1.79425	4.2	1.94831	6.34	2.20028	4.77273	0.922307	4.59091	1.53248	4	1.65831	6.12	1.98578	4.75	1.35935	3.95833	1.98865	4.4	2.21736	6.56	2.41661	四大皆空	46	22	24	50	25	25	四大皆空	86	25	四	747.386	5	大	6744.01	3	皆	55.939	9	空	758.875	8
1450	四目相视	Look at each other	5.07921	0.868138	5.18812	1.16373	5.44898	1.60807	7.22449	1.17731	4.92	0.853325	5.2	0.903508	5.32	1.77294	7.04	0.934523	5.23529	0.862282	5.17647	1.38139	5.58333	1.44212	7.41667	1.38051	四目相视	101	50	51	49	25	24	四目相视	67	27	四	747.386	5	目	1386.17	5	相	1565.14	9	视	842.207	8
1451	四舍五入	Rounding; half adjust	5.04124	0.285684	4.38144	1.4027	5.06122	2.24915	7.61224	1.09576	5.10638	0.311661	4.91489	0.775432	3.95833	2.36789	7.29167	1.0417	4.98	0.24661	3.88	1.66157	6.12	1.53623	7.92	1.07703	四舍五入	97	47	50	49	24	25	四舍五入	71	19	四	747.386	5	舍	87.4981	8	五	673.98	4	入	1407.48	2
1452	四维空间	Four dimensional space	5.05	0.220721	4.9	1.21529	3.95652	1.8007	6.23913	1.97973	5	0	4.84211	0.95819	3.95652	1.63702	5.73913	1.48377	5.09524	0.300793	4.95238	1.43095	3.95652	1.98811	6.73913	2.30054	四维空间	40	19	21	46	23	23	四维空间	57	31	四	747.386	5	维	231.345	11	空	758.875	8	间	1602.34	7
1453	四下无人	No one around	4.52083	1.03121	4.625	1.42359	5.12245	1.91085	6.97959	1.21604	4.64	1.11355	4.88	0.971253	4.58333	1.50121	6.58333	1.24819	4.3913	0.940944	4.34783	1.77377	5.64	2.13854	7.36	1.07548	四下无人	48	25	23	49	24	25	四下无人	72	14	四	747.386	5	下	2891.04	3	无	1828.92	4	人	10357.8	2
1454	四则运算	Four arithmetic operation	5	0	4.05	1.55167	5.40816	2.58133	7.87755	1.09226	5	0	4.47368	1.3486	4.36	1.8	7.56	1.08321	5	0	3.66667	1.65328	6.5	2.84376	8.20833	1.02062	四则运算	40	19	21	49	25	24	四则运算	96	32	四	747.386	5	则	634.108	6	运	1103.47	7	算	583.645	14
1455	伺机而动	Take the opportunity to move	4.98851	1.22469	5.33333	1.61869	6.32609	1.67404	7.21739	1.34846	4.93617	1.38947	5.6383	1.20552	5.64	1.70489	6.88	1.30128	5.05	1.01147	4.975	1.95445	7.14286	1.23635	7.61905	1.32198	伺机而动	87	47	40	46	25	21	伺机而动	77	27	待	326.983	9	机	2206.73	6	而	2283.95	6	动	3207.89	6
1459	速冻蔬菜	Frozen vegetables	5.04444	0.73718	4.55556	1.4547	5.57692	1.96385	7.19231	1.20519	5.28571	0.46291	5.19048	0.749603	4.59259	1.75979	6.92593	1.035	4.83333	0.868115	4	1.69398	6.64	1.60416	7.48	1.32665	速冻蔬菜	45	21	24	52	27	25	速冻蔬菜	43	43	速	471.687	10	冻	35.5451	7	蔬	19.1936	15	菜	188.924	11
1460	速溶咖啡	Instant coffee	5.32609	0.79034	4.41304	1.55744	6.28	2.18567	7.6	0.989743	5.34783	0.831685	4.73913	1.28691	4.88	1.81016	7.12	0.881287	5.30435	0.76484	4.08696	1.75585	7.68	1.54704	8.08	0.862168	速溶咖啡	46	23	23	50	25	25	速溶咖啡	142	42	速	471.687	10	溶	52.7736	13	咖	17.6946	8	啡	18.1879	11
1461	酸酸甜甜	Sour and sweet	5.68478	1.41169	5.05435	1.43073	5.5	1.75038	7.4375	1.07002	5.36	1.52425	4.96	1.42829	5.24	1.71464	7.36	1.03602	6.07143	1.18623	5.16667	1.46059	5.78261	1.78266	7.52174	1.12288	酸酸甜甜	46	25	21	48	25	23	酸酸甜甜	29	50	酸	135.598	14	酸	135.598	14	甜	39.5236	11	甜	39.5236	11
1464	随随便便	Casual	4.19231	1.05275	5.29808	1.15649	5.9	1.54193	7.4	0.832993	4.45098	0.923336	5.23529	0.929263	5.96	1.24097	7.08	0.702377	3.9434	1.11657	5.35849	1.34585	5.84	1.81842	7.72	0.842615	随随便便	104	51	53	50	25	25	随随便便	1121	40	随	474.528	11	随	474.528	11	便	601.79	9	便	601.79	9
1465	岁月如流	The months and years pass by like a stream.	4.72917	1.10588	5.22917	1.57426	3.16667	1.75443	7.22917	1.25883	4.83333	0.761387	5.375	0.923721	3.45833	2.04257	7.125	1.1156	4.625	1.37722	5.08333	2.04124	2.875	1.39292	7.33333	1.40393	岁月如流	48	24	24	48	24	24	岁月如流	68	26	岁	201.933	6	月	1839.86	4	如	1955.83	6	流	948.45	10
1468	态度自然	Social ease	5.97917	0.887012	4.16667	1.35793	6.2449	1.58811	7.2449	0.990173	5.92308	0.844894	4.53846	1.20767	5.79167	1.7932	7.125	0.991814	6.04545	0.950051	3.72727	1.42032	6.68	1.249	7.36	0.994987	态度自然	48	26	22	49	24	25	态度自然	39	35	态	234.592	8	度	1580.01	9	自	3316.74	6	然	1095.5	12
1471	谈何容易	Easier said than done	4.47917	0.922291	5.20833	1.2021	4.16327	1.63741	7.12245	1.21848	4.56	0.820569	5.32	1.249	4.72	1.45831	6.64	1.28712	4.3913	1.03305	5.08696	1.16436	3.58333	1.63964	7.625	0.923721	谈何容易	48	25	23	49	25	24	谈何容易	1216	35	谈	527.48	10	何	861.736	7	容	759.576	10	易	574.346	8
1477	碳酸氢铵	Ammonium bicarbonate	4.8	0.563869	4.7	1.18105	4.73913	1.56964	6.34783	1.87637	5	0	5.05556	0.235702	4.16667	1.52277	5.58333	1.99819	4.63636	0.726731	4.40909	1.53248	5.36364	1.39882	7.18182	1.33225	碳酸氢铵	40	18	22	46	24	22	碳酸氢铵	158	48	碳	32.6077	14	酸	135.598	14	氢	17.5198	9	铵	2.20936	11
1478	堂堂皇皇	Grand	5.06522	1.20004	5.1087	1.36997	5.02	1.46371	6.26	1.7357	4.95652	1.14726	5.3913	1.07615	4.8	1.5	6.16	1.51877	5.17391	1.26678	4.82609	1.58551	5.24	1.42244	6.36	1.95533	堂堂皇皇	46	23	23	50	25	25	堂堂皇皇	53	40	堂	217.514	11	堂	217.514	11	皇	114.007	9	皇	114.007	9
1482	桃色新闻	Love affair	4.1087	1.8765	5.80435	1.45479	4.36735	1.39484	6.83673	1.29658	3.27273	1.20245	5.40909	1.18157	4.24	1.71464	6.72	1.48661	4.875	2.07076	6.16667	1.60615	4.5	0.978019	6.95833	1.08264	桃色新闻	46	22	24	49	25	24	桃色新闻	74	38	桃	48.8496	10	色	949.075	6	新	2264.38	13	闻	580.753	9
1483	啼笑因缘	Bring your smile along	5.00685	1.51997	5.69178	1.11148	4.69565	1.50362	5.84783	2.10784	5.16216	1.54412	5.66216	1.06343	4.69565	1.52061	6.43478	1.56165	4.84722	1.48855	5.72222	1.16549	4.69565	1.52061	5.26087	2.43492	啼笑因缘	146	74	72	46	23	23	啼笑因缘	43	43	啼	3.13203	12	笑	335.449	10	姻	30.8971	9	缘	45.0228	12
1486	剃头师傅	Barber	5.01042	0.340117	4.44792	1.23859	3.97872	1.37508	7.06383	1.35782	5	0.298142	4.69565	1.05134	3.91667	1.5299	6.79167	1.28466	5.02	0.377424	4.22	1.35962	4.04348	1.22394	7.34783	1.40158	剃头师傅	96	46	50	47	24	23	剃头师傅	33	32	剃	5.67004	9	头	1198.71	5	师	662.888	6	傅	12.4022	12
1488	天地良心	Heaven and earth conscience	5.1875	1.02431	5.5625	1.36688	5.47917	1.96771	7.52083	0.922291	4.92	0.812404	5.36	1.11355	5.33333	1.99274	7.375	0.875388	5.47826	1.16266	5.78261	1.59421	5.625	1.97402	7.66667	0.963087	天地良心	48	25	23	48	24	24	天地良心	82	21	天	2247.5	4	地	4442.5	6	良	292.367	7	心	2318.57	4
1495	天涯地角	End of the earth	5.625	0.981206	5.39583	1.79526	3.84	1.92046	6.8	1.72615	5.44	0.869866	5.44	1.29357	3.28	1.98997	6.64	1.7767	5.82609	1.07247	5.34783	2.24841	4.4	1.70783	6.96	1.69509	天涯地角	48	25	23	50	25	25	天涯地角	41	28	天	2247.5	4	涯	11.4421	11	地	4442.5	6	角	305.106	7
1500	填平补齐	Fill up	5.34783	0.766446	5.08696	1.17049	5.58824	1.72252	6.43137	1.57804	5.52174	0.730477	5.6087	0.940944	5	1.6	6.88462	1.14287	5.17391	0.777652	4.56522	1.16096	6.2	1.65831	5.96	1.83666	填平补齐	46	23	23	51	26	25	填平补齐	86	31	填	41.4437	13	平	1603.12	5	补	232.938	7	齐	148.346	6
1504	铁板钉钉	Decided	5.71111	1.3919	5.64444	1.5099	4.58333	2.22015	7.10417	1.32472	6.04762	1.24403	5.71429	1.38358	4	1.84842	6.84	1.34412	5.41667	1.47196	5.58333	1.63964	5.21739	2.44868	7.3913	1.2699	铁板钉钉	45	21	24	48	25	23	铁板钉钉	27	32	铁	327.13	10	板	231.757	8	钉	18.8861	7	钉	18.8861	7
1506	铁路局长	Director of the railway	5.06122	0.37489	4.65306	1.30899	4.18	1.38048	6.66	1.8693	5.10638	0.311661	5.04255	0.464264	4.24	1.56205	6.76	1.53514	5.01961	0.423802	4.29412	1.68872	4.12	1.20139	6.56	2.18098	铁路局长	98	47	51	50	25	25	铁路局长	77	34	铁	327.13	10	路	1036.73	13	局	650.051	7	长	2117.13	4
1507	铁栅栏门	Iron fence door	4.65957	0.787859	4.5	1.57079	4.2449	1.68981	7.14286	1.08012	4.875	0.448427	4.45833	1.28466	4.33333	1.711	6.70833	1.08264	4.43478	0.992063	4.54348	1.85198	4.16	1.7	7.56	0.916515	铁栅栏门	47	24	23	49	24	25	铁栅栏门	70	31	铁	327.13	10	栅	4.80589	9	栏	61.5648	9	门	1206.79	3
1509	挺胸凸肚	Chest out; a high breast and big belly	4.2449	1.53474	5.42857	1.47196	5.71429	1.59426	6.61224	1.70558	4.56	1.66032	5.4	1.04083	5.84	1.54596	6.72	1.30767	3.91667	1.34864	5.45833	1.84106	5.58333	1.66594	6.5	2.06419	挺胸凸肚	49	25	24	49	25	24	挺胸凸肚	57	31	挺	53.1091	9	胸	74.0283	10	凸	11.1951	5	肚	35.7274	7
1511	同胞姐妹	Full sisters	5.95745	1.23284	4.89362	2.08758	4.16327	1.91863	7.65306	1.31579	6.04167	1.30148	5.25	1.89393	3.58333	1.95419	8.04167	0.907896	5.86957	1.17954	4.52174	2.25368	4.72	1.74452	7.28	1.54164	同胞姐妹	47	24	23	49	24	25	同胞姐妹	55	31	同	2786.12	6	胞	83.2447	9	姐	166.868	8	妹	94.7236	8
1516	童言无忌	Take no offense at a child's babble	5.84906	1.20153	5.21698	1.41425	4.85714	1.6457	7.46939	0.915197	6.25455	1.22048	5.32727	1.51602	4.08	1.49778	7.12	0.832666	5.41176	1.02326	5.09804	1.30008	5.66667	1.40393	7.83333	0.868115	童言无忌	106	55	51	49	25	24	童言无忌	76	30	童	92.4462	12	言	674.584	7	无	1828.92	4	忌	38.0933	7
1522	头版头条	Headlines	5.77778	1.04205	5.86667	1.4554	4.0625	1.50752	7.20833	1.23699	5.90909	1.15095	5.36364	1.46533	3.875	1.62354	7.125	1.2959	5.65217	0.934622	6.34783	1.30065	4.25	1.39096	7.29167	1.19707	头版头条	45	22	23	48	24	24	头版头条	551	25	头	1198.71	5	版	825.4	8	头	1198.71	5	条	824.875	7
1527	投亲靠友	Go to relatives and friends	4.59048	1.31336	5.57143	1.10816	5.0625	2.15768	7.3125	1.01387	5.18519	1.1828	5.5	1.02331	5.79167	2.1865	7.41667	0.880547	3.96078	1.14823	5.64706	1.19706	4.33333	1.90347	7.20833	1.14129	投亲靠友	105	54	51	48	24	24	投亲靠友	62	35	投	677.976	7	亲	659.671	9	靠	197.331	15	友	481.856	4
1531	徒子徒孙	Disciples and followers	5.19149	0.875718	5.14894	1.3348	4.78431	1.90067	6.92157	1.59804	4.95652	0.76742	5.04348	1.29609	4.18519	1.81949	7.14815	1.06351	5.41667	0.928611	5.25	1.39096	5.45833	1.7932	6.66667	2.03591	徒子徒孙	47	23	24	51	27	24	徒子徒孙	92	29	徒	149.117	10	子	3348.01	3	徒	149.117	10	孙	44.6193	6
1534	土地契约	Land contract	5	0.639602	4.64444	1.43266	3.74	2.08796	6.7	1.74087	5.04762	0.384212	4.85714	0.573212	3.16	1.90788	6.56	1.70978	4.95833	0.80645	4.45833	1.8877	4.32	2.13542	6.84	1.79536	土地契约	45	21	24	50	25	25	土地契约	104	24	土	568.512	3	地	4442.5	6	契	20.153	9	约	600.538	6
1536	土洋结合	Combine indigenous and foreign methods	5.45652	0.982209	5.28261	1.02552	5.41667	1.4267	6.375	1.73359	5.56522	0.992063	5.3913	1.07615	5.29167	1.70623	6.79167	1.28466	5.34783	0.982052	5.17391	0.984063	5.54167	1.10253	5.95833	2.0319	土洋结合	46	23	23	48	24	24	土洋结合	102	27	土	568.512	3	洋	271.058	9	结	1221.7	9	合	2129.25	6
1539	团指挥所	Regimental command post	5.04082	0.318449	4.59184	1.44191	3.04082	1.55402	6.22449	2.22921	5.04167	0.288675	4.75	1.13924	3.16667	1.57885	6.41667	2.10417	5.04	0.347586	4.44	1.68014	2.92	1.55242	6.04	2.37136	团指挥所	98	48	50	49	24	25	团指挥所	105	32	团	797.651	6	指	964.138	9	挥	296.666	9	所	2259.17	8
1541	拖儿带女	Life load; be tied down by kids	4.0495	0.887426	5.51485	1.03551	4.44898	1.72072	7.2449	0.968904	4.27451	0.850375	5.4902	0.966903	5.16667	1.60615	7.08333	0.928611	3.82	0.873417	5.54	1.11043	3.76	1.56205	7.4	1	拖儿带女	101	51	50	49	24	25	拖儿带女	97	22	拖	56.8433	8	儿	905.272	2	带	651.825	9	女	1009.76	3
1542	拖家带口	Have family burden	4.06522	1.06254	5.54348	1.20566	3.86957	1.61395	7.06522	1.01985	4.34783	1.07063	5.17391	1.11405	4	1.70561	6.86957	0.868873	3.78261	0.998022	5.91304	1.20276	3.73913	1.54383	7.26087	1.13688	拖家带口	46	23	23	46	23	23	拖家带口	59	30	拖	56.8433	8	家	3873.64	10	带	651.825	9	口	1079.29	3
1543	拖拉机手	Tractor	5.07143	0.600522	4.80952	1.23443	5.10204	1.66139	6.40816	1.99915	5.2381	0.624881	4.95238	0.920662	4.4	1.35401	6.8	1.44338	4.90476	0.538958	4.66667	1.49443	5.83333	1.6594	6	2.41373	拖拉机手	42	21	21	49	25	24	拖拉机手	84	26	拖	56.8433	8	拉	699.256	8	机	2206.73	6	手	1414.05	4
1554	外圆内方	Outwardly gentle but inwardly stern	5.35556	1.11101	4.57778	1.38972	4.64583	1.65657	6.66667	1.50649	5.04545	0.37509	4.95455	0.72225	4.12	1.76352	6.64	0.994987	5.65217	1.46501	4.21739	1.75697	5.21739	1.34693	6.69565	1.94082	外圆内方	45	22	23	48	25	23	外圆内方	34	23	外	2025.61	5	圆	135.24	10	内	1823.36	4	方	3269.88	4
1555	弯弯曲曲	Bending	4.87	0.661419	4.63	1.28437	4.72917	1.31666	7.35417	1.04147	4.85714	0.677003	4.97959	0.94626	4.6	1.58114	7.04	1.09848	4.88235	0.652597	4.29412	1.47369	4.86957	0.967863	7.69565	0.87567	弯弯曲曲	100	49	51	48	25	23	弯弯曲曲	859	30	弯	41.9561	9	弯	41.9561	9	曲	282.409	6	曲	282.409	6
1560	玩具手枪	Toy pistol	4.88636	0.868463	5.11364	1.20495	6.47059	1.86926	7.37255	1.24837	4.66667	1.01653	5.33333	0.57735	5.96154	1.37057	7.23077	0.992278	5.08696	0.668312	4.91304	1.56417	7	2.17945	7.52	1.47535	玩具手枪	44	21	23	51	26	25	玩具手枪	49	28	玩	120.326	8	具	771.698	8	手	1414.05	4	枪	137.611	8
1567	亡羊补牢	Mend the fold after the sheep have been stolen	5.07692	1.3197	5.60577	1.21813	5.57143	1.88193	7.36735	1.13089	5.5	1.0351	5.7	0.909137	5.125	1.84891	7.04167	0.999094	4.68519	1.43834	5.51852	1.45032	6	1.84842	7.68	1.1804	亡羊补牢	104	50	54	49	24	25	亡羊补牢	388	23	亡	89.0366	3	羊	86.095	6	补	232.938	7	牢	53.2594	7
1568	网中之鱼	Fish in the net	4.44681	1.41127	5.65957	1.33964	4.95745	2.36788	7.10638	1.18384	4.30435	1.06322	5.52174	0.790257	4.16667	1.83366	6.79167	0.977093	4.58333	1.69184	5.79167	1.71893	5.78261	2.61041	7.43478	1.30823	网中之鱼	47	23	24	47	24	23	网中之鱼	13	20	网	786.396	6	中	7314.64	4	之	2500.29	2	鱼	158.194	8
1569	望穿秋水	Gaze with eager expectation	4.58491	1.4856	5.68868	1.34775	4.55319	1.69152	6.85106	1.44431	4.83019	1.47721	5.88679	1.1035	4.65217	1.6127	6.69565	1.14554	4.33962	1.46686	5.49057	1.53951	4.45833	1.7932	7	1.69398	望穿秋水	106	53	53	47	23	24	望穿秋水	85	33	望	623.873	11	穿	174.362	9	秋	142.529	9	水	1535.76	4
1570	望梅止渴	Feed on fancies	5.97826	1.29081	5.69565	1.36414	5.13462	2.09602	7.23077	1.05933	5.91304	1.23998	5.78261	1.20441	4.2963	1.87729	7	1.20894	6.04348	1.36443	5.6087	1.52968	6.04	1.96808	7.48	0.822598	望梅止渴	46	23	23	52	27	25	望梅止渴	80	38	望	623.873	11	梅	15.8806	11	止	452.687	4	渴	37.6912	12
1572	微电子学	Microelectronics	5.02174	0.257262	4.34783	1.41763	4.8	1.42382	6.33333	2.01133	5.04167	0.358641	5.08333	0.28233	4.5	1.14434	5.77273	1.77098	5	0	3.54545	1.71067	5.08696	1.62125	6.86957	2.11712	微电子学	46	24	22	45	22	23	微电子学	101	29	微	300.879	13	电	2197.76	5	子	3348.01	3	学	4035.57	8
1574	为数更多	More number	5.27083	0.983688	4.79167	1.58394	4.96078	1.38507	6.78431	1.34631	5.44	1.04403	5.4	1.19024	4.77778	1.36814	6.55556	1.39596	5.08696	0.900154	4.13043	1.7137	5.16667	1.40393	7.04167	1.26763	为数更多	48	25	23	51	27	24	为数更多	60	30	为	5620.72	4	数	1155.01	13	更	697.279	7	多	2609.35	6
1577	围海造地	Land reclamation	5.23404	1.44783	5.42553	1.47065	4.86275	2.35813	6.86275	1.72069	5.875	1.191	5.79167	1.35066	4.48148	2.4553	6.77778	1.82574	4.56522	1.40861	5.04348	1.52191	5.29167	2.21613	6.95833	1.62799	围海造地	47	24	23	51	27	24	围海造地	81	33	围	389.919	7	海	1315.95	10	造	877.834	10	地	4442.5	6
1579	唯我独尊	Egoistic	5.04878	2.22431	6.41463	1.30337	6.02174	2.38969	7.43478	0.958058	4.31818	1.70116	5.81818	0.795006	5.56522	2.27289	7.17391	0.984063	5.89474	2.49209	7.10526	1.44894	6.47826	2.46557	7.69565	0.87567	唯我独尊	41	22	19	46	23	23	唯我独尊	272	39	唯	166.091	11	我	4474.19	7	独	390.408	9	尊	122.77	12
1582	卫生局长	Director of health	4.98	0.375513	4.4	1.37804	3.75	1.63082	6.77083	1.7165	5.02083	0.144338	4.75	1.06191	3.70833	1.75646	6.54167	1.76879	4.94231	0.501506	4.07692	1.55735	3.79167	1.53167	7	1.66812	卫生局长	100	48	52	48	24	24	卫生局长	64	19	卫	203.718	3	生	4823.71	5	局	650.051	7	长	2117.13	4
1584	温情主义	Sentiments	5.25	1.39146	4.5	1.39909	4.58	1.19676	6.12	1.49339	4.68	1.31403	4.88	1.16619	4.28	1.13725	6.4	1.08012	5.86957	1.21746	4.08696	1.53484	4.88	1.20139	5.84	1.79536	温情主义	48	25	23	50	25	25	温情主义	85	31	温	303.688	12	情	1729.84	11	主	4149.18	5	义	1204.83	3
1587	温血动物	Warm-blooded animals	5.08889	0.70137	4.48889	1.30771	5.02174	1.18301	5.95652	1.83735	5	0.426401	5.04348	0.474654	4.68182	0.893701	5.45455	1.71067	5.18182	0.906924	3.90909	1.63034	5.33333	1.34056	6.41667	1.86307	温血动物	45	23	22	46	22	24	温血动物	91	32	温	303.688	12	血	332.362	6	动	3207.89	6	物	1894.3	8
1588	文攻武卫	Offensive by the pen and defensive by the sword	5.13636	1.17317	5.54545	1.42167	4.54	1.97133	5.74	2.10742	4.86364	1.3556	5.68182	1.64422	4.2	1.93649	6.56	1.82757	5.40909	0.908116	5.40909	1.18157	4.88	1.98578	4.92	2.08006	文攻武卫	44	22	22	50	25	25	文攻武卫	72	22	文	2397.82	4	攻	284.438	7	武	208.985	8	卫	203.718	3
1593	纹风不动	Absolutely still or motionless	5.33333	1.00362	4.86022	1.38777	5.19231	1.95075	6.69231	1.60316	5.39583	1.08647	5.33333	0.85883	4.88889	1.64862	6.77778	1.25064	5.26667	0.914529	4.35556	1.65359	5.52	2.21961	6.6	1.93649	纹风不动	93	48	45	52	27	25	纹风不动	39	21	纹	22.3529	7	风	877.382	4	不	9822.27	4	动	3207.89	6
1594	闻声而至	Arrived after hearing the news	5.375	1.21384	5.39583	1.26726	5.34694	1.45131	6.95918	1.3379	5.79167	1.06237	5.79167	0.883627	5.75	1.35935	6.79167	0.832971	4.95833	1.23285	5	1.47442	4.96	1.45717	7.12	1.69115	闻声而至	48	24	24	49	24	25	闻声而至	28	28	闻	580.753	9	声	768.616	7	而	2283.95	6	至	846.806	6
1596	问来问去	Ask questions again and again	4.04808	0.938702	5.36538	1.19917	5.33333	1.79044	7.125	1.00266	4.36538	0.792832	5.26923	0.909975	5.70833	1.60106	6.83333	1.00722	3.73077	0.972472	5.46154	1.43433	4.95833	1.92194	7.41667	0.928611	问来问去	104	52	52	48	24	24	问来问去	45	24	问	1457.1	6	来	4682.8	7	问	1457.1	6	去	1621.28	5
1598	卧薪尝胆	To strengthen one’s resolve to achieve some ambition	5.86957	1.5145	6.13043	1.5579	5.5	2.00832	7.45652	0.935866	6	1.51186	6.27273	1.03196	5.31818	2.07906	7.31818	1.08612	5.75	1.53934	6	1.93368	5.66667	1.9708	7.58333	0.775532	卧薪尝胆	46	22	24	46	22	24	卧薪尝胆	619	42	卧	44.6282	8	薪	17.4851	16	尝	58.7192	9	胆	93.5696	9
1602	无处不见	Everywhere	5.12621	0.800485	4.8835	1.28568	4.04348	1.5049	7.17391	1.01772	5.16	0.509502	5.06	0.5115	4	1.38013	6.90909	0.971454	5.09434	1.00507	4.71698	1.71394	4.08333	1.63964	7.41667	1.01795	无处不见	103	50	53	46	22	24	无处不见	50	17	无	1828.92	4	处	1051.23	5	不	9822.27	4	见	1255.38	4
1613	无以为报	There is no way to repay	5.09709	1.03388	5.37864	1.43566	4.30189	1.57608	6.96226	1.44065	4.86275	1.0774	5.2549	1.14618	4.67857	1.67892	6.75	1.26564	5.32692	0.943942	5.5	1.67449	3.88	1.36382	7.2	1.60728	无以为报	103	51	52	53	28	25	无以为报	53	19	无	1828.92	4	以	4459.97	4	为	5620.72	4	报	2394.79	7
1614	无欲则刚	One can be austere if he has no selfish desires	5.51064	1.13965	4.68085	1.91228	5.84	1.75383	6.62	1.86142	5.70833	1.23285	4.875	1.77697	5.46154	1.85969	6.38462	1.94066	5.30435	1.01957	4.47826	2.06419	6.25	1.56733	6.875	1.77697	无欲则刚	47	24	23	50	26	24	无欲则刚	65	27	无	1828.92	4	欲	119.715	11	则	634.108	6	刚	242.845	6
1616	无遮无拦	No cover no block	4.02222	1.51491	5.82222	1.4968	5.1	1.70533	6.84	1.28349	4	1.3784	5.57143	1.2873	4.8	1.73205	6.72	1.36991	4.04167	1.65448	6.04167	1.65448	5.4	1.65831	6.96	1.20692	无遮无拦	45	21	24	50	25	25	无遮无拦	60	30	无	1828.92	4	遮	23.8464	14	无	1828.92	4	拦	24.1247	8
1617	无踪无影	Disappeared without a trace	4.20833	1.32019	5.02083	1.59106	4.78261	1.41285	7.1087	1.13975	4.19231	1.44275	5.42308	1.50128	4.21739	1.47576	6.65217	1.0273	4.22727	1.19251	4.54545	1.59545	5.34783	1.11227	7.56522	1.07982	无踪无影	48	26	22	46	23	23	无踪无影	94	38	无	1828.92	4	踪	23.728	15	无	1828.92	4	影	820.571	15
1621	五体投地	Extremely admire	5.61702	1.45293	5.78723	1.8408	4.34	1.95469	7.1	1.26572	5.32	1.79629	6.2	1.35401	4.68	2.21209	7.08	1.38203	5.95455	0.843873	5.31818	2.21222	4	1.63299	7.12	1.16619	五体投地	47	25	22	50	25	25	五体投地	637	24	五	673.98	4	体	2253.44	7	投	677.976	7	地	4442.5	6
1622	五味俱全	Various tastes of real life	5.74257	1.22191	5.34653	1.2119	5.27083	1.71029	7.625	1.00266	5.26531	1.28737	5.5102	1.08248	4.83333	1.8098	7.45833	1.06237	6.19231	0.97092	5.19231	1.31415	5.70833	1.51741	7.79167	0.931533	五味俱全	101	49	52	48	24	24	五味俱全	77	28	五	673.98	4	味	273.699	8	俱	33.5099	10	全	2321.82	6
1624	武装部长	Minister of armed forces	5.11765	0.493404	4.65686	1.41768	3.54167	1.73767	6.89583	1.56068	5	0.282843	4.84314	0.880285	3.58333	1.71735	6.91667	1.41165	5.23529	0.619298	4.47059	1.7928	3.5	1.79371	6.875	1.72734	武装部长	102	51	51	48	24	24	武装部长	99	34	武	208.985	8	装	700.949	12	部	3004.59	10	长	2117.13	4
1626	物理变化	Physical changes	5.09091	0.290803	4.18182	1.51385	4.28302	2.09741	7.15094	1.37835	5.09091	0.294245	5.09091	0.294245	3.85714	1.88	6.46429	1.34666	5.09091	0.294245	3.27273	1.69542	4.76	2.25979	7.92	0.953939	物理变化	44	22	22	53	28	25	物理变化	96	31	物	1894.3	8	理	2917.08	11	变	1060.95	8	化	2003.07	4
1627	西方净土	The heavenly paradise	5.93478	1.23652	4.80435	2.06149	3.93878	1.36027	5.87755	1.94329	5.40909	0.908116	4.86364	1.24577	3.75	1.56733	5.58333	1.74248	6.41667	1.31601	4.75	2.62513	4.12	1.1299	6.16	2.11503	西方净土	46	22	24	49	24	25	西方净土	70	21	西	1589.34	6	方	3269.88	4	净	102.779	8	土	568.512	3
1628	淅淅沥沥	The continuous patter of raindrops	4.97917	1.2289	4.875	1.59287	4.4898	1.08248	6.57143	1.60728	5	1.08012	4.8	1.52753	4.25	1.11316	6.08333	1.17646	4.95652	1.39734	4.95652	1.69164	4.72	1.02144	7.04	1.83666	淅淅沥沥	48	25	23	49	24	25	淅淅沥沥	286	36	淅	1.17579	11	淅	1.17579	11	沥	4.49697	7	沥	4.49697	7
1629	惜墨如金	Regard one's ink as if it were gold -- one will not easily paint	5.84783	1.53431	5.67391	1.33424	5.73469	1.75328	6.71429	1.68325	6.13636	1.42413	6	1.23443	5.84	1.92959	6.64	1.89033	5.58333	1.6129	5.375	1.37722	5.625	1.58286	6.79167	1.47381	惜墨如金	46	22	24	49	25	24	惜墨如金	59	40	惜	31.2393	11	墨	84.4647	15	如	1955.83	6	金	1155.2	8
1631	稀奇古怪	Strange and eccentric	4.875	1.14157	5.54167	1.32019	4.45833	1.71301	7.08333	1.49941	4.92	1.32035	5.56	0.869866	3.8	1.58114	6.6	1.68325	4.82609	0.936734	5.52174	1.70213	5.17391	1.58551	7.6087	1.07615	稀奇古怪	48	25	23	48	25	23	稀奇古怪	664	33	稀	50.6037	12	奇	294.162	8	古	540.629	5	怪	126.439	8
1634	稀稀落落	Sparse	4.10638	0.960843	5.25532	1.11254	4.8125	1.49689	6.66667	1.26042	4.17391	1.02922	5.08696	1.12464	4.47826	1.59173	6.6087	1.19617	4.04167	0.907896	5.41667	1.10007	5.12	1.36382	6.72	1.33915	稀稀落落	47	23	24	48	23	25	稀稀落落	247	48	稀	50.6037	12	稀	50.6037	12	落	422.942	12	落	422.942	12
1635	稀稀疏疏	Sparse	4.3913	0.855785	4.97826	1.06435	5.15686	1.13794	7.03922	1.18255	4.25	0.989071	5.20833	0.832971	5	1.20894	6.85185	1.26198	4.54545	0.670982	4.72727	1.24142	5.33333	1.0495	7.25	1.07339	稀稀疏疏	46	24	22	51	27	24	稀稀疏疏	69	48	稀	50.6037	12	稀	50.6037	12	疏	18.9915	12	疏	18.9915	12
1636	习惯使然	Force of habit	5.08163	0.67196	4.57143	1.30703	4.38298	1.89454	7.21277	1.02015	5.2	0.763763	4.56	1.26095	4.69565	1.9641	6.73913	0.963771	4.95833	0.550033	4.58333	1.38051	4.08333	1.81579	7.66667	0.868115	习惯使然	49	25	24	47	23	24	习惯使然	44	34	习	198.402	3	惯	121.491	11	使	1355.82	8	然	1095.5	12
1637	席卷而来	Sweep over	4.08511	1.39611	5.8617	1.54182	3.7551	1.85439	6.69388	1.62281	3.58333	1.34864	5.75	1.70038	3.92	2.01908	6.4	1.91485	4.6087	1.2699	5.97826	1.38563	3.58333	1.69184	7	1.21584	席卷而来	47	24	23	49	25	24	席卷而来	95	31	席	389.518	10	卷	178.009	8	而	2283.95	6	来	4682.8	7
1639	洗洗涮涮	Washing and rinsing	4.90385	0.583249	4.49038	1.23064	6.32075	1.70715	7.60377	1.08024	5.03774	0.478871	4.69811	0.952424	5.96429	1.55116	7.46429	0.881167	4.76471	0.650791	4.27451	1.44331	6.72	1.81475	7.76	1.26754	洗洗涮涮	104	53	51	53	28	25	洗洗涮涮	53	40	洗	138.54	9	洗	138.54	9	涮	2.26924	11	涮	2.26924	11
1643	戏曲音乐	Opera music	5.89583	1.40273	4.97917	2.06789	5.25532	1.95012	7.10638	1.18384	6.33333	1.23945	5.70833	1.89918	4.56522	1.7536	6.86957	1.21746	5.45833	1.444	4.25	2.00543	5.91667	1.93181	7.33333	1.12932	戏曲音乐	48	24	24	47	23	24	戏曲音乐	429	26	戏	234.451	6	曲	282.409	6	音	533.815	9	乐	675.803	5
1644	虾兵蟹将	A soldier of no use	4.16327	1.28041	5.10204	1.68628	4.97917	1.60438	6.72917	1.55385	4.08	1.35154	5.68	0.9	4.625	1.46888	6.25	1.77544	4.25	1.22474	4.5	2.08514	5.33333	1.6854	7.20833	1.14129	虾兵蟹将	49	25	24	48	24	24	虾兵蟹将	40	44	虾	14.7892	9	兵	551.831	7	蟹	2.3645	19	将	1120.39	9
1646	瞎子摸象	Blind men sizing up the elephant	5	0.942809	5.08696	1.60314	4.04	1.64081	6.8	1.67819	5.34783	0.982052	5.21739	1.24157	4.4	1.65831	6.56	1.38684	4.65217	0.775107	4.95652	1.91829	3.68	1.57374	7.04	1.92527	瞎子摸象	46	23	23	50	25	25	瞎子摸象	38	42	瞎	12.7404	15	子	3348.01	3	摸	54.3121	13	象	747.887	11
1652	先礼后兵	Try fair means before resorting to force	5.93617	1.20514	5.25532	1.68714	5.69388	1.96006	7.16327	1.43392	6.04167	1.26763	5.125	1.70198	5.52	1.8735	6.68	1.70098	5.82609	1.15413	5.3913	1.69864	5.875	2.07076	7.66667	0.868115	先礼后兵	47	24	23	49	25	24	先礼后兵	101	24	先	1153.1	6	礼	218.43	5	后	2743.81	6	兵	551.831	7
1653	先入之见	Preconception	4.56818	1.0432	5.27273	1.18839	5.06	1.50387	6.36	1.74683	5.09524	0.436436	5.04762	1.24403	5.28	1.33915	6.56	1.32539	4.08696	1.20276	5.47826	1.12288	4.84	1.65025	6.16	2.09523	先入之见	44	21	23	50	25	25	先入之见	105	14	先	1153.1	6	入	1407.48	2	之	2500.29	2	见	1255.38	4
[truncated: 723 more rows]
