# Supplementary material for: Age-Related Differences in Affective Norms for Chinese Words (AANC)
Source: Front Psychol. 2021 Apr 15;12:585666. doi: 10.3389/fpsyg.2021.585666 (PMC8082186; doi:10.3389/fpsyg.2021.585666)
Supplement: Supplementary file 3 [file Data_Sheet_1.xlsx]

## Sheet: Sheet1
AANC could be used for non-commercial research.

## Sheet: 2061WordNorms
Word No.	Chinese word	English translation	Valence category	All_Valence_Mean	All_Valence_SD	All_Arousal_Mean	All_Arousal_SD	All_Dominance_Mean	All_Dominance_SD	All_Familiarity_Mean	All_Familiarity_SD	Old_Valence_Mean	Old_Valence_SD	Old_Arousal_Mean	Old_Arousal_SD	Old_Dominance_Mean	Old_Dominance_SD	Old_Familiarity_Mean	Old_Familiarity_SD	Young_Valence_Mean	Young_Valence_SD	Young_Arousal_Mean	Young_Arousal_SD	Young_Dominance_Mean	Young_Dominance_SD	Young_Familiarity_Mean	Young_Familiarity_SD	Female_Valence_Mean	Female_Valence_SD	Female_Arousal_Mean	Female_Arousal_SD	Female_Dominance_Mean	Female_Dominance_SD	Female_Familiarity_Mean	Female_Familiarity_SD	Male_Valence_Mean	Male_Valence_SD	Male_Arousal_Mean	Male_Arousal_SD	Male_Dominance_Mean	Male_Dominance_SD	Male_Familiarity_Mean	Male_Familiarity_SD	Old_Female_Valence_Mean	Old_Female_Valence_SD	Old_Female_Arousal_Mean	Old_Female_Arousal_SD	Old_Female_Dominance_Mean	Old_Female_Dominance_SD
1	阿谀逢迎	Curry favour with sb	negative	2.37143	1.00247	6.61905	1.32564	5.10204	1.8056	7.10204	1.2289	2.34615	1.10053	6.59615	1.31745	5.12	1.78699	6.72	1.4	2.39623	0.905955	6.64151	1.34585	5.08333	1.86307	7.5	0.884652	2.30769	0.940139	6.75	1.13544	5.04	1.85921	7.12	0.881287	2.43396	1.06535	6.49057	1.48871	5.16667	1.78561	7.08333	1.5299	2.38462	1.0612	6.57692	1.10175	5.30769	1.93152
2	阿谀奉承	Flattery	negative	2.45192	1.01331	6.50962	1.2997	4.79592	2.15038	7.2449	1.29953	2.49057	1.12014	6.43396	1.43459	5.08333	2.20507	6.79167	1.25036	2.41176	0.898365	6.58824	1.15198	4.52	2.10396	7.68	1.21518	2.34615	1.00751	6.5	1.30609	4.875	2.25181	7.08333	1.55806	2.55769	1.01775	6.51923	1.30595	4.72	2.09205	7.4	1	2.5	1.10454	6.42308	1.44701	4.66667	2.49848
3	哀哀切切	Mournful	negative	3.4375	1.1468	5.60417	1.45485	4.55102	1.60807	6.26531	1.72935	3.45833	1.28466	5.625	1.49819	4.83333	1.6854	6.41667	1.1389	3.41667	1.01795	5.58333	1.44212	4.28	1.51438	6.12	2.16641	3.19231	1.20064	5.88462	1.65715	4.52174	1.92754	6.91304	1.47442	3.72727	1.03196	5.27273	1.12045	4.57692	1.30148	5.69231	1.76112	2.78571	1.18831	6.07143	1.73046	4.81818	2.13627
4	哀痛欲绝	Wring one's heart to the very core	negative	2.11905	1.25333	7.28571	1.34863	4.04167	2.16312	7.27083	0.916505	1.73684	1.04574	7.84211	1.01451	3.95652	1.98811	7.08696	0.99604	2.43478	1.34252	6.82609	1.43502	4.12	2.35089	7.44	0.820569	1.70833	1.16018	7.58333	1.38051	4.45833	2.34018	7.29167	1.08264	2.66667	1.18818	6.88889	1.2314	3.625	1.92946	7.25	0.73721	1.16667	0.389249	8.25	0.753778	4.91667	2.2747
5	唉声叹气	Moan and groan	negative	2.9717	1.05521	5.63208	1.38925	5.56	1.76311	7.36	1.20814	3.21154	1.09072	5.40385	1.31745	5.96	1.56738	7.2	1.1547	2.74074	0.974877	5.85185	1.43287	5.16	1.88591	7.52	1.26227	2.84314	1.12022	5.82353	1.26025	5.44	1.82757	7.76	1.0116	3.09091	0.98644	5.45455	1.48845	5.68	1.7253	6.96	1.2741	2.91667	1.1389	5.5	1.10335	5.76923	1.87767
6	挨门逐户	From house to house	neutral	4.72596	0.790968	5.05769	1.05045	5.18	1.80351	6.5	1.54193	4.98077	0.699871	4.94231	0.802287	5.12	2.00666	6.68	1.21518	4.47115	0.800817	5.17308	1.24808	5.24	1.61452	6.32	1.81934	4.79	0.783047	4.98	1.07836	5.16667	1.9708	7.04167	0.858673	4.66667	0.800943	5.12963	1.02876	5.19231	1.67378	6	1.85472	5.16	0.553775	4.84	0.898146	4.5	2.19504
7	爱不忍释	Love sth too much to part with it	positive	6.04348	1.19176	5.58696	1.42324	5.67347	1.88622	6.5102	1.70932	6.09091	1.4771	5.77273	1.50971	5.64	2.15793	6.52	1.55778	6	0.884652	5.41667	1.34864	5.70833	1.60106	6.5	1.88818	6	1.38313	5.58333	1.63964	5.33333	1.83366	6.375	1.78916	6.09091	0.971454	5.59091	1.18157	6	1.91485	6.64	1.65529	6	1.70561	6	1.70561	5.75	1.95982
8	爱才如命	Cherish talents very much	neutral	5.22115	2.14049	6.13462	1.20724	5.71429	1.77951	7.16327	1.23063	4.45283	2.18003	5.98113	1.40727	5.5	1.7693	6.875	1.07592	6.01961	1.79433	6.29412	0.944333	5.92	1.80093	7.44	1.32539	5.17308	2.06484	6.21154	0.976921	5.95652	1.60902	7.04348	1.39734	5.26923	2.23269	6.05769	1.40606	5.5	1.92354	7.26923	1.07917	4.55556	2.08167	6.25926	1.19591	5.36364	1.91169
9	爱财如命	Covetous	negative	2.99057	1.18318	5.93396	1.32571	5.29167	2.15326	7.125	1.56593	2.62963	1.23313	5.96296	1.47895	5.75	2.15184	7.08333	1.10007	3.36538	1.01032	5.90385	1.1591	4.83333	2.099	7.16667	1.94862	2.85185	1.15591	5.72222	1.35168	5.08696	2.19323	7.47826	1.23838	3.13462	1.20504	6.15385	1.27394	5.48	2.14321	6.8	1.77951	2.35714	1.12922	5.92857	1.56178	5.75	2.22077
10	爱厂如家	Love one's enterprise like one's home	positive	6.45283	1.37413	5.5566	1.81045	6.33333	1.64166	6.97917	1.56409	7.13208	1.16086	5.9434	2.01356	6.73913	1.71139	7.6087	0.988071	5.77358	1.23478	5.16981	1.50302	5.96	1.51327	6.4	1.77951	6.43137	1.47316	5.64706	1.70673	6.17391	1.77488	6.69565	1.91726	6.47273	1.28891	5.47273	1.91345	6.48	1.5308	7.24	1.12842	7.08	1.32035	6.16	1.88591	7.09091	1.70027
11	爱出风头	Like to stay in the spotlight	negative	3.1087	1.01605	5.67391	1.47655	5.78	1.76462	7.32	1.0583	3.09091	1.01929	5.45455	1.59545	5.88	1.85562	7.2	0.957427	3.125	1.03472	5.875	1.36135	5.68	1.70098	7.44	1.15758	3.08333	1.17646	5.54167	1.74404	5.75	1.96159	7.41667	1.05981	3.13636	0.83355	5.81818	1.13961	5.80769	1.60048	7.23077	1.06987	2.91667	1.1645	5.25	1.91288	6	2.21565
12	爱搭不理	Give [get] the cold shoulder	negative	3.16327	0.874332	5.73469	1.23787	5.20833	2.05207	7.35417	1.24609	3.36	0.907377	5.76	1.0116	5.56	1.73397	7.12	1.33292	2.95833	0.80645	5.70833	1.45898	4.82609	2.32872	7.6087	1.11759	3.11538	1.03255	5.61538	1.32897	5.29167	2.27423	7.29167	1.42887	3.21739	0.671262	5.86957	1.14035	5.125	1.84891	7.41667	1.05981	3.28571	1.06904	5.64286	1.15073	5.76923	2.04751
13	爱护备至	Take care of it	positive	6.63043	1.1027	5.63043	1.65138	5.89583	1.93775	7.27083	0.868836	6.54545	1.05683	6.18182	1.25874	5.33333	2.03591	7.125	0.740887	6.70833	1.16018	5.125	1.82525	6.45833	1.69344	7.41667	0.974308	6.66667	1.37261	5.95833	1.45898	5.69565	2.09837	7.21739	0.850482	6.59091	0.73414	5.27273	1.80428	6.08	1.80093	7.32	0.9	6.5	1.3817	6.25	1.13818	5.08333	2.10878
14	爱民如子	Love the subjects as if they were his own children	positive	7.08411	1.13372	5.97196	1.81949	4.42553	2.21403	7.23404	1.18345	7.20755	1.14956	6.35849	1.89223	4.26087	2.3973	7.26087	0.915393	6.96296	1.1153	5.59259	1.67691	4.58333	2.06243	7.20833	1.41357	7.09434	1.24444	6.03774	1.81831	4.65217	2.18692	7.04348	1.39734	7.07407	1.02519	5.90741	1.83538	4.20833	2.26465	7.41667	0.928611	7.15385	1.28662	6.84615	1.59229	4.27273	2.53341
15	爱屋及乌	Love me, love my dog	neutral	5.82979	1.2392	5.53191	1.44239	6.14583	1.55727	6.91667	1.31818	5.95652	0.824525	4.91304	1.47442	5.70833	1.68056	6.41667	1.55806	5.70833	1.5458	6.125	1.15392	6.58333	1.31601	7.41667	0.775532	6	1.02353	5.5	1.50396	6.36364	1.7874	7.13636	1.24577	5.68	1.40594	5.56	1.41657	5.96154	1.34107	6.73077	1.37281	5.8	0.788811	4.8	1.61933	6.36364	2.06265
16	安安心心	Peace of mind	positive	6.33673	1.16094	4.35714	2.01556	5.78846	1.79691	7.48077	0.999811	6.42308	1.27037	5.30769	1.93431	5.66667	1.81871	7.2963	0.992852	6.23913	1.04305	3.28261	1.52871	5.92	1.80093	7.68	0.988264	6.22	1.22543	4.46	2.10119	6	1.76635	7.5	1.14018	6.45833	1.10253	4.25	1.96159	5.57692	1.8368	7.46154	0.859338	6.28571	1.38278	5.42857	1.98898	5.57143	1.86936
17	安邦定国	Bring peace and stability to the country	positive	6.79592	1.25797	5.85714	2.06155	3.94118	2.38673	7.19608	1.38592	6.84	1.24766	6.08	1.95619	3.51852	2.42377	7.07407	1.43918	6.75	1.2938	5.625	2.18319	4.41667	2.30154	7.33333	1.34056	6.68	1.40594	5.92	1.91311	4.30769	2.4943	7.26923	1.21845	6.91667	1.10007	5.79167	2.24537	3.56	2.2561	7.12	1.56312	6.38462	1.38675	6.46154	1.56074	3.64286	2.64886
18	安邦治国	National stability	positive	6.71429	1.35401	5.63265	2.09855	4.30612	2.34702	7.02041	1.5744	6.6	1.32288	6.08	1.73013	4.08	2.62869	6.84	1.90788	6.83333	1.40393	5.16667	2.37133	4.54167	2.04257	7.20833	1.14129	6.52	1.5308	5.84	2.09523	4.58333	2.5862	6.875	1.80127	6.91667	1.1389	5.41667	2.12473	4.04	2.11108	7.16	1.34412	6.23077	1.48064	6.15385	1.72463	4.23077	2.80339
19	安分守己	Remain in one's proper sphere	neutral	5.9434	1.1533	4.75472	1.64931	6.36735	1.90059	7.5102	1.12031	6.27273	1.1778	5.07273	1.7832	6.2	1.93649	7.48	1.00499	5.58824	1.02326	4.41176	1.43075	6.54167	1.8877	7.54167	1.25036	5.77358	1.15428	4.77358	1.82548	6.52174	2.12922	7.6087	1.2699	6.11321	1.13782	4.73585	1.46958	6.23077	1.70429	7.42308	0.986836	6.17857	1.18801	5.28571	1.95992	6.33333	2.22928
20	安家立业	Set up a home and establish a business	positive	6.29167	1.16616	5.08333	1.86608	5.68085	2.18797	7.40426	1.19163	6.30769	1.34964	5.42308	1.77027	4.86957	2.45513	7	1.08711	6.27273	0.935125	4.68182	1.93677	6.45833	1.58743	7.79167	1.17877	6.16667	1.20386	5.04167	1.82921	5.82609	2.01477	7.30435	1.42812	6.41667	1.1389	5.125	1.9407	5.54167	2.37705	7.5	0.932505	6.21429	1.42389	5.85714	1.46009	5.09091	2.54773
21	安如泰山	Be as steady as rocks	positive	6.4381	1.04627	5.20952	1.90997	5.47917	2.05239	7.08333	1.04847	6.76923	1.00226	6.07692	1.74722	4.45833	1.86452	6.79167	1.10253	6.11321	0.993447	4.35849	1.6767	6.5	1.71945	7.375	0.923721	6.37037	1.01491	5.37037	1.67441	5.17391	2.08135	6.91304	1.16436	6.5098	1.08393	5.03922	2.13505	5.76	2.02649	7.24	0.925563	6.55556	0.974022	6.14815	1.45981	4.08333	1.83196
22	安身立命	One's life has the whereabouts and one's spirit has its entrustment	neutral	5.02222	0.865734	5.42222	1.09729	5.24	1.96458	6.94	1.40567	4.90909	1.01929	5.45455	0.670982	4.76	1.87705	6.64	1.49666	5.13043	0.694416	5.3913	1.4058	5.72	1.96893	7.24	1.26754	4.73913	1.00983	5.34783	0.982052	5.46154	2.0829	6.61538	1.65111	5.31818	0.5679	5.5	1.22474	5	1.84155	7.29167	0.999094	4.58333	1.24011	5.58333	0.792961	4.85714	2.0702
23	安守本分	Abide by the duty	positive	6.10417	1.30856	4.5	1.59787	5.84906	2.08839	7.5283	1.01154	6.24	1.09087	4.4	1.75594	5.57143	2.2514	7.42857	0.920087	5.95652	1.52191	4.6087	1.43777	6.16	1.88591	7.64	1.11355	6.12	1.0924	4.68	1.7253	6.03846	2.06844	7.46154	1.02882	6.08696	1.53484	4.30435	1.4596	5.66667	2.13037	7.59259	1.00992	6.21429	1.0509	4.57143	2.06488	5.78571	2.35922
24	安闲自在	Disengagement	positive	6.27619	1.08747	4.44762	1.66399	6.85417	1.39893	7.5625	1.04995	5.86538	0.792832	4.67308	1.43788	6.30435	1.25896	7.30435	0.926125	6.67925	1.18927	4.22642	1.84643	7.36	1.35031	7.8	1.11803	6.32075	1.13973	4.43396	1.82408	7.125	1.36135	7.875	0.991814	6.23077	1.04065	4.46154	1.50113	6.58333	1.41165	7.25	1.03209	5.96296	0.979854	4.51852	1.78391	6.66667	1.43548
25	鞍前马后	Follow around	neutral	5.71739	1.16739	5.58696	1.30939	4.74	1.98782	7.2	1.2289	5.68182	1.12911	5.68182	1.12911	5	2.14834	7	1.35873	5.75	1.22474	5.5	1.47442	4.43478	1.77933	7.43478	1.03687	6.08333	1.17646	5.20833	1.53167	5	1.93649	6.96	1.51327	5.31818	1.04135	6	0.872872	4.48	2.04369	7.44	0.820569	6.08333	1.1645	5.66667	1.30268	4.92857	2.12908
26	按部就班	Follow the prescribed order	neutral	5.71111	1.07919	4.88889	1.68175	6.29167	1.79785	7.375	1.12278	5.72727	0.935125	5.09091	1.4445	5.92	1.82392	7.04	1.20692	5.69565	1.22232	4.69565	1.8934	6.69565	1.71715	7.73913	0.915393	5.69565	1.06322	4.69565	1.79481	6.41667	1.66594	7.375	1.34528	5.72727	1.12045	5.09091	1.57084	6.16667	1.94862	7.375	0.875388	5.41667	0.900337	4.83333	1.58592	6	1.68325
27	案头工作	Deskwork	neutral	4.90698	0.750046	4.67442	1.28584	5.04082	1.73156	6.30612	1.74647	5.1	0.307794	5.05	0.223607	4.95833	1.65448	6.33333	1.49395	4.73913	0.963771	4.34783	1.69515	5.12	1.83303	6.28	1.98997	4.82609	0.984063	4.6087	1.55911	5	1.90693	6.52174	1.85545	5	0.324443	4.75	0.910465	5.07692	1.59808	6.11538	1.65715	5.18182	0.40452	5.09091	0.301511	4.72727	2.00454
28	暗度陈仓	Do one thing under cover of another	neutral	4.45349	1.6425	5.94186	1.39203	4.84783	1.94328	6.65217	1.63595	4.33333	1.55212	5.6	1.21356	4.77273	2.18069	6.72727	1.20245	4.58537	1.74608	6.31707	1.49062	4.91667	1.74248	6.58333	1.97631	4.175	1.63123	5.95	1.44914	4.81818	1.91824	6.13636	1.959	4.69565	1.63122	5.93478	1.3565	4.875	2.00678	7.125	1.1156	4	1.41421	5.63636	1.1358	5.09091	2.38556
29	暗箭伤人	To wound sb with a sniping arrow	negative	2.63043	1.38818	6.58696	1.9041	3.83673	1.80678	6.95918	1.54055	2.6087	1.46905	5.91304	2.27462	4.08	1.77764	6.68	1.54704	2.65217	1.33514	7.26087	1.13688	3.58333	1.83958	7.25	1.51083	2.5	1.50396	6.86364	1.69861	3.76	1.85472	7.2	1.19024	2.75	1.2938	6.33333	2.07818	3.91667	1.79169	6.70833	1.82921	2.5	2.01384	6.3	2.05751	4	2.16025
30	暗送秋波	Make eyes at a man	neutral	5.34314	1.45898	5.86275	1.11727	6.31818	1.47495	7.45455	1.02196	4.98	1.26958	5.64	0.827092	6.31818	1.17053	7.31818	0.893701	5.69231	1.55347	6.07692	1.31128	6.31818	1.75625	7.59091	1.14056	5.31373	1.12232	5.64706	0.996464	6.59091	1.2596	7.54545	1.22386	5.37255	1.74311	6.07843	1.19738	6.04545	1.64685	7.36364	0.789542	5.03846	1.3109	5.65385	0.845804	6.63636	1.28629
31	昂头挺胸	Hold one's head high	positive	6.69524	1.16952	6.1619	1.49437	6.64	1.72331	7.68	0.867556	6.63462	1.18865	6.15385	1.39164	6.11538	1.68112	7.34615	0.845804	6.75472	1.15867	6.16981	1.60211	7.20833	1.61458	8.04167	0.750604	6.77358	1.29558	6.22642	1.47598	6.36	1.62993	7.52	0.87178	6.61538	1.03192	6.09615	1.52444	6.92	1.80093	7.84	0.85049	6.7037	1.46274	6.33333	1.38675	6.30769	1.37747
32	凹凹凸凸	Concave-convex	neutral	4.47826	0.752452	4.67391	1.2833	4.34783	1.07945	6.30435	1.91914	4.6087	0.583027	4.73913	0.810016	4	1.12815	6.34783	1.36877	4.34783	0.884652	4.6087	1.64425	4.69565	0.926125	6.26087	2.37826	4.43478	0.727767	4.82609	1.30217	4.77273	1.02036	6.40909	1.96781	4.52174	0.790257	4.52174	1.27456	3.95833	0.999094	6.20833	1.91059	4.58333	0.514929	4.91667	0.792961	4.36364	1.20605
33	傲然挺立	Stand proudly	positive	6.89362	1.28932	5.93617	1.91566	5.48	2.11158	6.98	1.31692	7.125	1.42379	6	1.79371	4.84	2.0347	6.68	1.10755	6.65217	1.11227	5.86957	2.07374	6.12	2.02731	7.28	1.45831	7.24	1.26754	6.32	2.03552	5.54167	2.2063	6.75	1.59483	6.5	1.22474	5.5	1.71131	5.42308	2.06249	7.19231	0.980581	7.38462	1.26085	6.61538	1.50214	4.83333	2.51661
34	傲然屹立	Proudly stand	positive	6.93878	1.40547	6.32653	1.84151	5.38298	2.22196	7.17021	0.962767	7.12	1.58955	6.32	2.15484	4.43478	2.23253	6.91304	0.949308	6.75	1.18872	6.33333	1.49395	6.29167	1.82921	7.41667	0.928611	7.26923	1.40165	6.23077	2.08437	5.58333	2.18526	7.125	1.15392	6.56522	1.34252	6.43478	1.56165	5.17391	2.28935	7.21739	0.735868	7.57143	1.39859	6.28571	2.64367	4.91667	2.50303
35	奥妙无穷	Infinite mystery	positive	6.67619	0.995135	6.30476	1.30917	4.81633	1.6792	7.02041	1.29887	6.50943	0.992717	6.32075	1.43813	4.29167	1.75646	6.625	1.31256	6.84615	0.977885	6.28846	1.17718	5.32	1.46401	7.4	1.19024	6.71698	0.927722	6.16981	1.23625	4.69565	1.60779	6.86957	1.48643	6.63462	1.06695	6.44231	1.37789	4.92308	1.76461	7.15385	1.12044	6.46154	0.811456	6.19231	1.29674	4.27273	1.79393
36	八拜之交	Sworn brothers	positive	6.44231	1.05045	6.03846	1.42054	5.33333	1.65457	6.25	1.83929	6.38	0.945235	6.28	0.990568	5.34783	1.5553	6	1.62369	6.5	1.14513	5.81481	1.70542	5.32	1.77294	6.48	2.0232	6.56604	1.04715	6.18868	1.28687	5.3913	1.61637	6.43478	1.7536	6.31373	1.04862	5.88235	1.54463	5.28	1.72047	6.08	1.93477	6.42308	1.06482	6.42308	0.945434	5.54545	1.91644
37	八方支援	Support coming from all quarters	positive	7.06604	1.14033	6.86792	1.33862	4.84783	2.26046	7.52174	0.960072	6.98148	1.10728	6.74074	1.49446	4.34783	2.34731	7.3913	0.891328	7.15385	1.17798	7	1.1547	5.34783	2.10214	7.65217	1.0273	7.09091	1.25126	7.16364	1.10158	4.43478	2.35152	7.43478	1.03687	7.03922	1.01903	6.54902	1.50085	5.26087	2.13664	7.6087	0.891328	6.92857	1.2451	7.25	1.2057	3.90909	2.3002
38	八字胡子	Beard	neutral	4.91262	0.929967	4.54369	1.34147	5.69565	1.47376	6.78261	1.31509	4.86	0.728711	4.68	0.998775	5.20833	1.21509	6.58333	1.17646	4.96226	1.09126	4.41509	1.59848	6.22727	1.57153	7	1.44749	4.78	0.887326	4.56	1.37262	5.68182	1.78316	7	1.48003	5.03774	0.960013	4.5283	1.32438	5.70833	1.16018	6.58333	1.1389	4.875	0.899879	4.625	1.13492	5.27273	1.61808
39	白白净净	White and clean	positive	6.21905	1.03757	5.15238	1.54908	5.14	1.52543	7.3	1.16496	6.03846	0.948922	5.30769	1.51513	4.92	1.80093	7.24	0.969536	6.39623	1.09789	5	1.58114	5.36	1.18603	7.36	1.35031	6.38462	1.12291	5.51923	1.48839	5.36	1.38082	7.48	1.22882	6.0566	0.928504	4.79245	1.53621	4.92	1.6563	7.12	1.0924	6.12	0.971253	5.8	1.44338	5.23077	1.7867
40	白菜帮子	Stalk of chinese cabbage	neutral	4.61364	0.689317	3.95455	1.39692	6.02041	2.07655	7.34694	1.34708	4.63636	0.657952	4.40909	1.22121	5.23077	2.06509	7.34615	1.12933	4.59091	0.73414	3.5	1.43925	6.91304	1.72977	7.34783	1.58426	4.52174	0.790257	3.6087	1.52968	6.16	1.99332	7.36	1.46856	4.71429	0.560612	4.33333	1.1547	5.875	2.19312	7.33333	1.23945	4.72727	0.64667	4.18182	1.53741	5.38462	1.93815
41	白费口舌	Waste of tongue and mouth	negative	3.02083	1.24609	5.72917	1.26726	4.40816	1.49887	6.97959	0.901152	2.84	1.21381	5.88	1.30128	4.52	1.55778	6.68	0.9	3.21739	1.27766	5.56522	1.23679	4.29167	1.45898	7.29167	0.80645	2.875	1.48361	5.79167	1.53167	4.25	1.42188	6.95833	0.999094	3.16667	0.963087	5.66667	0.963087	4.56	1.58325	7	0.816497	2.30769	1.1094	6.30769	1.49358	4.66667	1.61433
42	白费心思	Waste of thought	negative	3.18478	0.962397	5.58696	1.49928	4.52083	1.67573	7.29167	1.07106	3.25	1.07339	5.5	1.47442	5.17391	1.43502	6.95652	0.877924	3.11364	0.844193	5.68182	1.55491	3.92	1.68127	7.6	1.1547	3.32609	1.08302	5.3913	1.33958	4.33333	1.55106	7.41667	0.928611	3.04348	0.824525	5.78261	1.65025	4.70833	1.80529	7.16667	1.20386	3.58333	1.08362	5.5	1.08711	5	1.53741
43	白领工人	White-collar worker	neutral	5.16304	0.760514	4.44565	1.42294	4.74468	1.72536	7.12766	1.07576	5.04348	0.366589	4.3913	1.19617	4.44	1.55671	6.88	0.971253	5.28261	1.00934	4.5	1.64455	5.09091	1.87487	7.40909	1.14056	5.1087	0.797104	4.54348	1.46871	5.26087	1.57299	7	1.2792	5.21739	0.735868	4.34783	1.40158	4.25	1.75078	7.25	0.84699	5.08333	0.288675	4.25	1.60255	4.75	1.71226
44	白日见鬼	See ghosts in broad daylight	negative	2.55556	1.17851	6.77778	1.34653	3.7551	1.67743	6.06122	2.23055	2.45455	1.18431	6.36364	1.52894	4.04	2.00998	5.52	2.53509	2.65217	1.19121	7.17391	1.02922	3.45833	1.21509	6.625	1.73988	2.29167	1.36666	7.04167	1.23285	3.88	1.66633	5.96	2.45764	2.85714	0.853564	6.47619	1.43593	3.625	1.71471	6.16667	2.01444	2	1.2792	6.66667	1.23091	3.84615	2.03495
45	白日做梦	Indulge in wishful thinking	negative	3.28261	1.20486	5.78261	1.24567	4.73585	1.8203	7.28302	1.11592	3.24	1.26754	5.64	1.31909	4.67857	1.72248	6.78571	1.10075	3.33333	1.1547	5.95238	1.16087	4.8	1.95789	7.84	0.85049	3.34783	1.43364	5.56522	1.30823	4.53846	1.55514	7.38462	1.35873	3.21739	0.951388	6	1.16775	4.92593	2.0555	7.18519	0.833761	3.07692	1.38212	5.53846	1.33012	4.28571	1.38278
46	百般刁难	Create all sorts of obstacles	negative	2.52174	1.13017	6.43478	1.68196	3.53191	1.8749	7.2766	0.948732	2.52174	1.16266	5.86957	2.00691	3.65217	1.79921	7	0.904534	2.52174	1.12288	7	1.04447	3.41667	1.97631	7.54167	0.931533	2.13636	1.08213	6.86364	1.45718	3.6087	2.06131	7.47826	1.03877	2.875	1.07592	6.04167	1.80529	3.45833	1.71893	7.08333	0.829702	2.1	1.28668	6.4	1.83787	3.63636	2.11058
47	百步穿杨	Pierce a willow leaf with an arrow from the distance of a hundred paces	positive	6.17391	1.38731	6.13043	1.72058	5.62	1.85043	6.72	1.65418	5.91304	1.70329	5.47826	1.90381	5.07692	1.71868	6.65385	1.64784	6.43478	0.945135	6.78261	1.24157	6.20833	1.84106	6.79167	1.69344	5.81818	1.43548	6.27273	1.63829	5.52	1.89561	6.6	1.73205	6.5	1.28537	6	1.81779	5.72	1.83757	6.84	1.59896	5.45455	1.91644	6.09091	1.92117	5.30769	1.88788
48	百川归海	All rivers flow to the sea	positive	6.15217	1.03209	5.65217	1.64948	3.46939	2.06258	7.14286	1.70783	6.17391	1.15413	5.78261	1.56544	2.79167	1.74404	7	1.41421	6.13043	0.919701	5.52174	1.75472	4.12	2.16641	7.28	1.96893	6.22727	1.10978	5.63636	1.94068	3.6	2.06155	6.96	1.94679	6.08333	0.974308	5.66667	1.37261	3.33333	2.099	7.33333	1.43456	6.45455	1.4397	5.90909	2.07145	2.69231	1.75046
49	百废待兴	A lot of things are waiting to be rebuilt	neutral	5.51923	1.6309	5.86538	1.43505	4.59184	2.08085	7.18367	1.31772	5.90566	1.58435	5.79245	1.63329	4.375	2.26144	6.95833	1.26763	5.11765	1.59558	5.94118	1.20684	4.8	1.91485	7.4	1.35401	5.34615	1.53245	6	1.31358	5.04	2.0306	7.16	1.46287	5.69231	1.72113	5.73077	1.54812	4.125	2.07076	7.20833	1.17877	5.69231	1.59422	6.11538	1.39505	4.46154	2.14536
50	百废俱兴	Full-scale reconstruction	neutral	5.97826	1.48308	6.34783	1.44864	4.86	2.35615	6.92	1.60153	6.18182	1.53177	6.18182	1.76302	4.07407	2.28584	6.81481	1.73287	5.79167	1.444	6.5	1.10335	5.78261	2.13108	7.04348	1.46095	6.08696	1.20276	6.3913	1.33958	4.72	2.28254	6.8	1.89297	5.86957	1.74002	6.30435	1.57926	5	2.46644	7.04	1.2741	5.72727	1.19087	6.45455	1.4397	4.28571	2.33464
51	百口莫辩	Beyond dispute	negative	3.38462	1.20925	6.25	1.41935	3.68	1.81198	7.1	1.16496	3.70588	1.17122	5.70588	1.4042	4.32	1.79629	6.84	0.986577	3.07547	1.17423	6.77358	1.23478	3.04	1.61967	7.36	1.28712	3.09804	1.25307	6.5098	1.52804	3.92	1.91311	7.2	1.04083	3.66038	1.10842	6	1.27098	3.44	1.70978	7	1.29099	3.375	1.34528	6.08333	1.66594	4.53846	2.14536
52	百里之遥	Thousands of miles away	neutral	4.85714	0.6833	5	1.03594	3.82979	1.68522	6.85106	1.45928	5.15789	0.374634	5.15789	0.374634	4.33333	1.90347	6.41667	1.50121	4.6087	0.782718	4.86957	1.35862	3.30435	1.25896	7.30435	1.29456	4.95238	0.589592	5.2381	0.624881	3.75	1.70038	6.75	1.89393	4.7619	0.768424	4.7619	1.30018	3.91304	1.70329	6.95652	0.824525	5.1	0.316228	5.2	0.421637	4	2
53	百炼成钢	Be tempered into a strong person as steel in long and repeated struggles	positive	6.59804	1.15407	6.34314	1.42464	5.34043	2.09841	7.40426	1.11627	6.90196	1.20424	6.72549	1.31268	4.78261	2.1523	7.17391	1.26678	6.29412	1.02556	5.96078	1.44168	5.875	1.9407	7.625	0.923721	6.60784	1.13276	6.15686	1.44738	4.95652	2.24577	7.34783	1.33514	6.58824	1.1862	6.52941	1.39073	5.70833	1.92194	7.45833	0.883627	7.03846	1.18257	6.84615	1.1897	4.27273	2.3277
54	百年之好	Remain a devoted couple to the end of their lives	positive	7.21495	1.09913	5.86916	1.96711	5.3125	2.04374	7.375	1.00266	7.27273	1.14592	6.2	2.0037	4.83333	2.20013	7.375	1.0135	7.15385	1.05505	5.51923	1.88378	5.79167	1.7932	7.375	1.0135	7.32075	1.13973	6.09434	1.91416	5.13043	1.89027	7.30435	1.10514	7.11111	1.05806	5.64815	2.01089	5.48	2.20076	7.44	0.916515	7.32143	1.12393	6.60714	1.64067	4.63636	2.37793
55	百鸟争鸣	A hundred birds contend in singing	positive	6.70755	1.25711	6.16981	1.52735	4.48936	1.54459	7.17021	1.16692	6.92593	1.21083	6.51852	1.62226	3.73913	1.28691	6.86957	0.919701	6.48077	1.27557	5.80769	1.34366	5.20833	1.444	7.45833	1.31807	6.96296	1.33124	6.24074	1.659	4.68182	1.49241	7.36364	1.17698	6.44231	1.12744	6.09615	1.38987	4.32	1.6	7	1.1547	7.14286	1.17739	6.60714	1.74991	3.90909	1.51357
56	百业待兴	A lot of things need to be done, the metaphor is not good, and the economy needs to be developed.	neutral	5.60748	1.25711	5.80374	1.60447	4.33333	2.38886	7.05882	1.37712	5.90741	1.23271	5.75926	1.63609	3.74074	2.31371	6.7037	1.5396	5.30189	1.21821	5.84906	1.58595	5	2.34057	7.45833	1.06237	5.42593	1.09203	6	1.22859	4.23077	2.45451	6.96154	1.70835	5.79245	1.39171	5.60377	1.90485	4.44	2.36432	7.16	0.943398	5.77778	1.01274	6	1.27098	4.07143	2.58589
57	百依百顺	Obedience	neutral	5.45192	1.27622	5.31731	1.35291	5.12245	2.16634	7.34694	0.969343	5.46154	1.22813	5.26923	1.3153	4.83333	2.099	7.125	0.946963	5.44231	1.33451	5.36538	1.40068	5.4	2.23607	7.56	0.960902	5.48	1.1292	5.16	1.33034	4.875	2.09165	7.16667	1.0495	5.42593	1.40889	5.46296	1.36966	5.36	2.25241	7.52	0.87178	5.76	1.09087	5.2	1.44338	5.08333	2.10878
58	摆臭架子	Put on the dog; put on that disgusting airs	negative	2.3617	1.05141	5.95745	1.65447	5.26	1.71202	7.2	0.968904	2.16	1.02794	5.72	1.94765	5.36	1.75309	6.92	0.909212	2.59091	1.05375	6.22727	1.23179	5.16	1.7	7.48	0.962635	2.16667	1.16718	6.04167	1.5458	5.16	1.7	7.16	1.02794	2.56522	0.895752	5.86957	1.7915	5.36	1.75309	7.24	0.925563	1.84615	1.06819	6.07692	1.65638	5.15385	1.95133
59	摆花架子	Flower arrangement	negative	3.21739	1.03092	5.67391	1.57839	5.22449	1.66164	6.71429	1.27475	3.34783	1.15242	5.04348	1.7183	5.25	1.67462	6.75	0.944089	3.08696	0.900154	6.30435	1.14554	5.2	1.68325	6.68	1.54704	3	1.18322	5.80952	1.86062	4.95833	1.75646	6.29167	1.57367	3.4	0.866025	5.56	1.32539	5.48	1.55778	7.12	0.725718	3.1	1.37032	4.8	2.04396	5	2
60	败军之将	Defeated general	negative	3.34694	1.33153	5.85714	1.58114	4.66	2.0762	6.28	1.93823	3.2	1.35401	5.8	1.41421	4.64	1.84572	6.2	1.65831	3.5	1.31876	5.91667	1.76725	4.68	2.32236	6.36	2.2151	3	1.25831	6.68	1.14455	4.32	2.01494	6.48	2.0025	3.70833	1.33447	5	1.53226	5	2.12132	6.08	1.89121	2.76923	1.36344	6.69231	1.18213	3.61538	1.7097
61	拜把兄弟	Worshiping the brothers	neutral	5.90385	1.25039	5.79808	1.48376	5.35294	1.9882	7.43137	0.984985	5.71698	1.32109	5.92453	1.28376	4.7037	1.91783	7.18519	1.00142	6.09804	1.15334	5.66667	1.66933	6.08333	1.83958	7.70833	0.907896	5.98	1.03982	5.62	1.22708	5.38462	1.69887	7.34615	1.01754	5.83333	1.42418	5.96296	1.6819	5.32	2.28619	7.52	0.962635	5.84615	1.04661	6.03846	0.915675	4.85714	1.83375
62	班门弄斧	Display one's slight skill before an ecpert	negative	3.33333	0.953463	5.57778	1.30539	5.25	1.6822	7.1875	1.21439	3.28571	1.0556	5.61905	1.24403	5.2	1.73205	6.92	1.11505	3.375	0.875388	5.54167	1.38247	5.30435	1.66337	7.47826	1.27456	3.30435	1.14554	5.30435	1.42812	5	1.90693	7.13043	1.39167	3.36364	0.726731	5.86364	1.12527	5.48	1.44684	7.24	1.05198	3.18182	1.32802	5.54545	1.12815	4.58333	2.06522
63	半军事化	Semi militarized	neutral	5.1165	0.690282	4.90291	1.32483	3.36735	1.4097	6.63265	1.74038	5.33333	0.653197	5.01961	1.04862	3.52	1.19443	6.56	1.52971	4.90385	0.664495	4.78846	1.55092	3.20833	1.61458	6.70833	1.96666	5.1	0.646813	4.8	1.19523	3.04167	1.12208	6.375	1.92946	5.13208	0.734788	5	1.44115	3.68	1.6	6.88	1.53623	5.375	0.710939	4.95833	0.690253	3.23077	1.23517
64	半老徐娘	An elder woman who has past her prime	neutral	4.22222	1.2949	5.31111	1.45886	4.44898	1.38536	6.14286	1.87083	4.38095	0.973457	5.14286	0.963624	4.33333	1.20386	6.16667	1.27404	4.08333	1.5299	5.45833	1.7932	4.56	1.55671	6.12	2.3331	4.3913	1.4058	5.43478	1.64665	4.04348	1.36443	6.47826	1.78044	4.04545	1.17422	5.18182	1.25874	4.80769	1.32723	5.84615	1.93271	4.54545	1.03573	5.18182	0.873863	3.90909	1.3751
65	半梦半醒	Half awaken	neutral	4.28889	1.05792	4.88889	1.0274	4.46939	1.54248	6.87755	1.60251	4.21739	1.20441	4.86957	0.868873	4.92	1.55242	6.48	1.71075	4.36364	0.902138	4.90909	1.1916	4	1.41421	7.29167	1.39811	4.375	1.13492	4.83333	0.916831	4.2	1.55456	6.84	1.99332	4.19048	0.980767	4.95238	1.16087	4.75	1.51083	6.91667	1.10007	4.23077	1.30089	5	0.816497	4.69231	1.6525
66	半吞半吐	Half concealing, half telling	negative	3.45833	1.051	5.125	1.31481	5.02041	1.47888	6.63265	1.39484	3.24	1.12842	4.84	1.21381	5.25	1.32698	6.29167	1.16018	3.69565	0.926125	5.43478	1.37597	4.8	1.60728	6.96	1.54056	3.33333	1.00722	4.79167	1.38247	5	1.3484	6.82609	1.49703	3.58333	1.10007	5.45833	1.17877	5.03846	1.61197	6.46154	1.30325	3	1.1547	4.61538	1.38675	5.54545	1.50756
67	半醒半睡	Half waking and half sleeping	neutral	4.34091	0.913546	5.11364	1.26152	4.97917	1.50869	7.14583	1.12967	4.52381	0.749603	4.61905	1.2836	5.25	1.39096	6.70833	0.858673	4.17391	1.02922	5.56522	1.07982	4.70833	1.60106	7.58333	1.21285	4.31818	1.08612	5.09091	1.54023	5.30435	1.4596	7.26087	1.13688	4.36364	0.726731	5.13636	0.940894	4.68	1.51987	7.04	1.13578	4.4	0.966092	4.6	1.83787	5.72727	1.42063
68	棒打鸳鸯	Break up affectionate couples	negative	3.09524	1.2444	6.48571	1.24123	3.97872	1.96147	7	1.31876	3.66038	1.28517	6.07547	1.28376	4.26087	1.88818	6.73913	1.00983	2.51923	0.896406	6.90385	1.05272	3.70833	2.0319	7.25	1.53934	2.73077	1.10463	6.76923	1.19829	4.04348	2.05555	7.08696	1.47442	3.45283	1.27951	6.20755	1.23036	3.91667	1.90917	6.91667	1.17646	3.12	1.23558	6.52	1.32665	4.09091	2.11918
69	包干到户	Dry up to the household	neutral	5.79167	1.21967	5.45833	1.35204	4.67347	1.88622	6.26531	2.01841	6.08	1.28841	5.68	1.31403	4.70833	2.13621	6.58333	1.41165	5.47826	1.08165	5.21739	1.38027	4.64	1.65529	5.96	2.45764	5.58333	1.44212	5.58333	1.38051	4.625	1.78916	5.95833	1.94443	6	0.932505	5.33333	1.34056	4.72	2.0108	6.56	2.08327	6.07692	1.44115	6.07692	1.11516	4	1.80907
70	饱经磨难	Hardship	neutral	4.33962	1.45986	5.72642	1.34895	4.1875	1.99634	7.25	0.956501	4.71698	1.33557	5.35849	1.14513	4.20833	1.8877	6.95833	0.954585	3.96226	1.49309	6.09434	1.44467	4.16667	2.14003	7.54167	0.883627	4.24528	1.47942	5.64151	1.46883	3.91667	1.99819	7.20833	0.977093	4.43396	1.44794	5.81132	1.22563	4.45833	1.99955	7.29167	0.954585	4.96296	1.31505	5.37037	1.18153	3.91667	2.15146
71	宝贝疙瘩	Baby	neutral	5.89583	1.53317	5.60417	1.74721	5.56522	1.99613	7.13043	1.22218	6.16667	1.37261	5.91667	1.66594	4.91304	2.02064	7.13043	1.09977	5.625	1.66322	5.29167	1.80529	6.21739	1.78266	7.13043	1.35862	6.04	1.3687	5.68	1.62583	6.04348	1.94184	7.30435	1.39593	5.73913	1.71139	5.52174	1.90381	5.08696	1.97514	6.95652	1.02151	6.46154	1.1266	6.53846	1.19829	5.54545	2.29624
72	宝中之宝	The treasure of the treasure	positive	6.89583	1.13437	6.3125	1.75228	4.63462	1.65718	6.46154	1.72025	6.8	1.22474	6.44	1.47422	4.22222	1.64862	6.62963	1.39085	7	1.04447	6.17391	2.0372	5.08	1.57903	6.28	2.03142	6.92	1.22202	6.48	1.89561	5	1.29615	6.19231	1.95998	6.86957	1.05763	6.13043	1.6041	4.26923	1.90909	6.73077	1.4299	7.07143	1.32806	6.85714	1.51186	5.14286	1.23146
73	保守疗法	Conservative treatment	neutral	4.95238	0.538851	4.61905	1.26785	4.16327	1.77185	6.73469	1.71726	5	0.458831	4.95	0.887041	4.16667	2.03591	6.875	1.191	4.90909	0.610159	4.31818	1.49241	4.16	1.51877	6.6	2.12132	5	0.333333	4.26316	1.44692	4.08333	1.86307	6.75	1.70038	4.91304	0.668312	4.91304	1.04067	4.24	1.71464	6.72	1.76824	5	0	5.125	1.3562	3.83333	2.16725
74	保险装置	Insurance device	neutral	5.19388	0.586061	4.77551	1.23964	5	1.82946	7.04	1.30868	5.125	0.392754	5.125	0.788886	4.36	1.7767	6.76	1.33167	5.26	0.723089	4.44	1.48681	5.64	1.68028	7.32	1.249	5.2	0.571429	4.6	1.41421	4.88	1.71561	6.88	1.42361	5.1875	0.606919	4.95833	1.0097	5.12	1.96469	7.2	1.19024	5.125	0.337832	5.125	0.899879	4.46154	1.85362
75	抱打不平	Take up the cudgels for the injured party	positive	6.02913	1.20827	6.36893	1.07549	6.2766	1.7901	7.53191	0.996757	5.96226	1.48015	6.43396	0.930456	5.86957	2.11712	7.56522	0.787752	6.1	0.839096	6.3	1.21638	6.66667	1.34056	7.5	1.17954	6	1.26801	6.25	1.04553	6.6087	1.92446	7.56522	1.23679	6.05882	1.15606	6.4902	1.10223	5.95833	1.62799	7.5	0.722315	6.11111	1.52753	6.59259	0.797074	5.90909	2.50817
76	抱恨终身	Hatred for life	negative	2.75	1.33091	6.59434	1.4783	4.16327	1.95093	7.14286	1.04083	3.01869	1.42074	6.28037	1.61242	4.76	2.02649	6.76	1.16476	2.47619	1.17747	6.91429	1.25663	3.54167	1.69344	7.54167	0.72106	2.39806	1.15758	6.83495	1.32174	4.16667	2.16025	7.08333	0.880547	3.08257	1.40191	6.36697	1.585	4.16	1.772	7.2	1.19024	2.61538	1.19071	6.65385	1.51961	4.75	2.49089
77	悲愤交加	Grief and indignation	negative	2.9505	1.28356	6.92079	1.28595	4.61224	1.86878	7.14286	1.24164	2.95833	1.35204	6.79167	1.36769	4.88	1.9	6.8	1.38444	2.9434	1.23125	7.03774	1.20834	4.33333	1.83366	7.5	0.978019	2.54	1.1466	7.08	1.44052	4.66667	1.78561	7	1.41421	3.35294	1.29342	6.76471	1.10613	4.56	1.98074	7.28	1.06145	2.21739	1.04257	7.04348	1.66456	4.83333	1.99241
78	悲观厌世	Be pessimistic and worldweary	negative	2.65049	1.04515	6.07767	1.3981	4.13725	1.87638	7	1.26491	2.62745	1.09473	5.96078	1.39944	4.39286	1.95011	6.64286	1.44566	2.67308	1.00433	6.19231	1.40082	3.82609	1.77488	7.43478	0.843482	2.52941	1.046	6.17647	1.46569	3.65385	1.64784	6.96154	1.58697	2.76923	1.04065	5.98077	1.33564	4.64	1.9975	7.04	0.840635	2.4	1.08012	6.12	1.45258	3.92857	1.68543
79	悲痛欲绝	Distraught	negative	2.25	1.05929	7.29545	1.3568	4.52174	2.14724	7.73913	0.99855	2.14286	1.06234	6.90476	1.57812	4.90909	2.48633	7.40909	0.908116	2.34783	1.07063	7.65217	1.0273	4.16667	1.76109	8.04167	0.999094	1.86957	0.967863	7.6087	1.11759	4.52381	2.22753	7.7619	0.995227	2.66667	1.01653	6.95238	1.53219	4.52	2.12368	7.72	1.02144	1.5	0.522233	7.5	1.08711	5.1	2.60128
80	北方领土	Northern territory	neutral	5	0.355409	4.55208	1.30481	4.13725	1.84412	7.07843	1.53419	5	0.361158	4.59574	1.09663	3.92593	2.07412	7.03704	1.65207	5	0.353553	4.5102	1.48776	4.375	1.55515	7.125	1.42379	5	0	4.2766	1.36258	3.96154	1.96938	6.69231	1.82799	5	0.5	4.81633	1.20197	4.32	1.7253	7.48	1.04563	5	0	4.17391	1.33662	3.92857	2.36852
81	备尝艰辛	To taste the hardships	neutral	4.22917	1.60106	5.4375	1.80903	4.09434	1.78954	6.9434	1.33611	4.5	1.79371	5.16667	1.85722	4.17857	1.76496	6.57143	1.42539	3.95833	1.36666	5.70833	1.75646	4	1.84842	7.36	1.11355	3.66667	1.37261	5.95833	1.62799	4.07692	1.74179	6.76923	1.50486	4.79167	1.64129	4.91667	1.86307	4.11111	1.8674	7.11111	1.1547	3.75	1.54479	5.75	1.76455	3.64286	1.69193
82	备而不用	Ready just in case	neutral	4.65217	1.35347	4.97826	1.06435	5.90196	1.5265	7.01961	1.19147	4.73913	1.54383	5.08696	0.99604	5.55556	1.39596	6.88889	1.08604	4.56522	1.16096	4.86957	1.14035	6.29167	1.60106	7.16667	1.30773	4.5	1.37148	5.09091	0.921132	5.65385	1.19808	6.65385	1.41258	4.79167	1.35066	4.875	1.191	6.16	1.79536	7.4	0.763763	4.27273	1.55505	5.36364	0.504525	5.35714	1.21574
83	倍受鼓舞	Encouraged	positive	6.9505	0.952641	6.67327	1.25785	5.125	2.18919	7.5625	0.848183	6.83673	0.964947	6.63265	1.13089	4.45833	1.95558	7.25	0.73721	7.05769	0.937528	6.71154	1.37679	5.79167	2.24537	7.875	0.850192	7	1.06642	6.69231	1.4078	4.875	2.04966	7.45833	0.977093	6.89796	0.822722	6.65306	1.0907	5.375	2.33708	7.66667	0.701964	6.84615	1.08415	6.53846	1.39229	4.41667	1.92865
84	奔流不息	Flow continuously	positive	6.13043	1.34344	5.56522	1.64184	4.12766	2.07068	7.25532	1.05229	6.04167	1.48848	5.41667	1.66594	3.66667	2.01444	7.125	1.03472	6.22727	1.19251	5.72727	1.63829	4.6087	2.06131	7.3913	1.07615	6.32	1.21518	5.4	1.84842	3.6087	2.08325	7.6087	0.988071	5.90476	1.48003	5.7619	1.37495	4.625	1.97402	6.91667	1.01795	6.23077	1.23517	5.69231	1.84321	3.33333	2.18812
85	奔腾咆哮	Raging roaring	neutral	5.33333	1.65457	6.875	1.36249	4.12	2.14419	6.6	1.85164	5.625	1.66322	6.54167	1.50302	3.64	2.25241	6.44	2.06317	5.04167	1.62799	7.20833	1.14129	4.6	1.95789	6.76	1.64012	5.43478	1.92652	6.91304	1.37883	4.2	2.21736	6.24	2.14631	5.24	1.39284	6.84	1.37477	4.04	2.11108	6.96	1.45717	5.90909	2.07145	6.54545	1.50756	3.69231	2.52932
86	奔腾澎湃	Pentium surging	positive	6.59574	1.32959	6.44681	1.48629	4.44898	2.01102	6.89796	1.72294	6.91667	1.28255	6.58333	1.71735	4	1.95789	6.52	1.96044	6.26087	1.32175	6.30435	1.22232	4.91667	1.99819	7.29167	1.36666	6.54167	1.444	6.20833	1.444	4.28	2.30072	6.92	2.05994	6.65217	1.22877	6.69565	1.52061	4.625	1.68916	6.875	1.32902	6.61538	1.38675	6.53846	1.6641	4	2.3094
87	本本分分	Not go beyond moral bounds	neutral	5.82979	0.916495	4.53191	1.70487	6.375	1.45317	7.60417	1.0667	5.95833	0.954585	4.875	1.77697	6.13043	1.6598	7.3913	1.03305	5.69565	0.87567	4.17391	1.58551	6.6	1.22474	7.8	1.08012	5.90909	0.610159	4.27273	1.90693	6.65217	1.46501	7.69565	1.14554	5.76	1.12842	4.76	1.50776	6.12	1.42361	7.52	1.00499	6	0.632456	4.54545	2.0181	6.90909	1.70027
88	本小利微	The small profits	neutral	4.82609	1.06049	5.1087	1.12008	5.18367	1.4094	6.85714	1.25831	5.34783	0.934622	5.3913	1.03305	5.33333	1.37261	6.75	0.989071	4.30435	0.926125	4.82609	1.15413	5.04	1.45717	6.96	1.48549	5.04	1.05987	5.24	1.26754	5.34783	1.5553	7.08696	1.08347	4.57143	1.02817	4.95238	0.920662	5.03846	1.28002	6.65385	1.38397	5.46154	1.1266	5.61538	1.26085	5.81818	1.66242
89	笨鸟先飞	The slow need to start early	neutral	5.59574	1.40897	5.6383	1.45102	6.17021	1.64606	7.46809	0.855953	5.52174	1.47308	5.78261	1.44463	5.65217	1.87347	7.04348	0.705708	5.66667	1.37261	5.5	1.47442	6.66667	1.23945	7.875	0.797414	5.73913	1.5141	5.65217	1.46501	6	1.50756	7.43478	0.895752	5.45833	1.31807	5.625	1.46888	6.33333	1.78561	7.5	0.834058	5.45455	1.36848	5.81818	1.4013	5.25	1.76455
90	笨头笨脑	Stupid	negative	3.33333	0.952786	5.10417	1.24182	4.58333	1.77252	7.1875	1.21439	3.28	0.842615	5.12	1.20139	4.13043	1.51671	6.95652	1.02151	3.3913	1.07615	5.08696	1.31125	5	1.91485	7.4	1.35401	3.29167	1.12208	5.08333	1.01795	4.13043	1.54638	7	1.50756	3.375	0.76967	5.125	1.454	5	1.89297	7.36	0.860233	3.23077	1.09193	4.92308	1.18754	3.81818	1.07872
91	笨嘴拙舌	Awkward in speech	negative	3.53191	1.06017	5.38298	1.3602	4.77083	1.66618	6.8125	1.28255	3.625	0.824226	5.25	1.18872	4.70833	1.48848	6.54167	1.25036	3.43478	1.27301	5.52174	1.53355	4.83333	1.85722	7.08333	1.28255	3.72	1.17331	5.28	1.24231	4.6087	1.75134	6.86957	1.39167	3.31818	0.893701	5.5	1.50396	4.92	1.6052	6.76	1.2	3.92308	0.493548	5.15385	1.06819	4.72727	1.73729
92	比肩而立	Stand shoulder to shoulder	neutral	5.33333	0.852803	4.8	1.53149	5.52083	1.2546	6.33333	1.62864	5.33333	0.57735	5.14286	0.573212	5.34783	1.11227	6.34783	1.26522	5.33333	1.0495	4.5	2	5.68	1.37598	6.32	1.93046	5.3913	0.838783	4.73913	1.71139	5.56522	1.40861	6.30435	1.49042	5.27273	0.882735	4.86364	1.3556	5.48	1.1225	6.36	1.7767	5.45455	0.522233	5.27273	0.467099	5.27273	1.27208
93	比手划脚	Mime	negative	3.79167	1.23699	5.4375	1.20117	5.81633	1.50932	7.18367	1.14879	3.84	0.986577	5.28	0.936305	5.83333	1.27404	7.04167	0.954585	3.73913	1.48377	5.6087	1.43777	5.8	1.73205	7.32	1.31403	3.91667	1.24819	5.04167	1.0417	6.04	1.67033	7.44	0.960902	3.66667	1.23945	5.83333	1.23945	5.58333	1.31601	6.91667	1.28255	3.92308	0.954074	5.30769	0.480384	5.92308	1.44115
94	比翼双飞	Happy couple	positive	7.05714	1.03616	6.33333	1.54837	5.68627	1.93381	7.31373	1.06752	7.09259	1.12045	6.55556	1.65594	5.73077	2.03091	7.19231	1.05903	7.01961	0.948477	6.09804	1.40364	5.64	1.86815	7.44	1.08321	7.13462	1.06695	6.48077	1.29085	5.68	1.7253	7.32	1.02956	6.98113	1.00939	6.18868	1.76566	5.69231	2.14978	7.30769	1.12318	7.11111	1.1209	6.92593	0.997147	5.61538	2.18092
95	笔下生花	Be apt in writing	positive	6.83696	1.02228	6.25	1.40139	6.20833	1.57045	7.14583	0.874937	6.79167	1.14129	6.375	1.55515	6	1.50362	7	0.978019	6.88636	0.898833	6.11364	1.23377	6.41667	1.63964	7.29167	0.750604	6.79545	1.24077	6.34091	0.836466	6	1.73205	7.30435	0.87567	6.875	0.797414	6.16667	1.78561	6.4	1.41421	7	0.866025	6.58333	1.37895	6.41667	1.08362	5.54545	1.86353
96	必恭必敬	In a most respectful attitude	positive	6.25	1.37609	5.54167	1.66258	5.27083	2.10106	7.3125	1.3072	6.375	1.31256	5.33333	1.73623	5.32	2.24944	7.36	0.994987	6.125	1.454	5.75	1.59483	5.21739	1.97614	7.26087	1.60163	6.42308	1.4191	5.65385	1.64784	5.16667	2.21981	7.5	1.06322	6.04545	1.32655	5.40909	1.70878	5.375	2.01759	7.125	1.51263	6.5	1.40055	5.5	1.87083	5.38462	2.25605
97	闭口无言	Remain silent	neutral	4.12222	1.13396	4.61111	1.2008	5.7551	1.66497	7	1.27475	4.08696	1.31125	4.47826	1.20112	5.92	1.6052	7.04	1.20692	4.15909	0.943478	4.75	1.21253	5.58333	1.74248	6.95833	1.36666	4.0625	1.43188	4.64583	1.3227	6.08	1.38203	7.04	1.42829	4.19048	0.679636	4.57143	1.07571	5.41667	1.88626	6.95833	1.12208	3.92308	1.65638	4.38462	1.50214	6.15385	1.67562
98	闭门思过	To shut one’s door and reflect on one’s misdeeds	neutral	4.40816	1.25695	4.85714	1.5	5.21277	2.05295	7.19149	1.035	4.84	1.1431	4.92	1.03763	5.625	1.76469	7.125	0.899879	3.95833	1.23285	4.79167	1.8877	4.78261	2.27549	7.26087	1.17618	4.48	1.26227	4.8	1.55456	5.47826	2.15047	7.47826	1.12288	4.33333	1.27404	4.91667	1.47196	4.95833	1.96666	6.91667	0.880547	4.69231	1.25064	4.84615	1.06819	6.27273	1.48936
99	闭月羞花	Be so beautiful that the moon hides her face and the flowers blush for shame at sight of her	positive	6.36111	1.33576	5.61111	1.49036	4.88	1.50699	7.16	1.31491	5.76364	1.17005	5.2	1.32497	4.84615	1.59229	6.53846	1.33359	6.98113	1.21672	6.03774	1.54375	4.91667	1.44212	7.83333	0.916831	6.44643	1.24929	5.48214	1.45216	5.08	1.25565	7.36	1.22066	6.26923	1.42959	5.75	1.53233	4.68	1.7253	6.96	1.39881	6	1.06904	5.17241	1.36458	5.15385	1.51911
100	碧波万顷	A vast expanse of blue waves	positive	6.97917	1.29631	5.9375	2.23518	3.75472	1.66301	6.92453	1.67388	7.08	1.22202	5.96	2.3	3.39286	1.66309	6.89286	1.25725	6.86957	1.39167	5.91304	2.21386	4.16	1.59896	6.96	2.07123	7.16	1.37477	6.36	2.25241	3.88462	1.77374	6.5	1.81659	6.78261	1.20441	5.47826	2.1715	3.62963	1.57256	7.33333	1.44115	7.30769	1.25064	6.46154	2.47034	3.21429	1.80506
101	碧空如洗	A cloudless blue sky	positive	6.20833	1.98889	5.66667	1.87178	3.91837	1.66879	6.53061	2.00106	6.4	2	6.08	1.80093	3.66667	1.76109	6.66667	1.40393	6	2	5.21739	1.88189	4.16	1.57268	6.4	2.46644	6.625	1.78916	5.66667	1.6594	4	1.66812	6.75	1.70038	5.79167	2.12601	5.66667	2.099	3.84	1.7	6.32	2.26789	6.84615	1.51911	6	1.73205	3.58333	1.83196
102	避难就易	Avoid difficulties to do easy tasks	neutral	4.60417	1.4694	5.27083	1.23322	5.55102	1.9797	6.95918	1.44279	4.44	1.60935	5.2	1.38444	5.72	1.56844	6.4	1.63299	4.78261	1.31275	5.34783	1.07063	5.375	2.35561	7.54167	0.931533	4.6	1.63299	5.16	1.31276	5.83333	2.099	6.75	1.91675	4.6087	1.3052	5.3913	1.15755	5.28	1.86011	7.16	0.746101	4.28571	1.68379	5.07143	1.63915	5.53846	1.89804
103	边边角角	Corner	neutral	4.81188	0.703034	4.79208	1.2595	5.31373	1.65518	6.96078	1.44168	5.02041	0.381324	4.95918	0.815454	5.19231	1.78928	7.15385	0.92487	4.61538	0.866678	4.63462	1.55965	5.44	1.52971	6.76	1.83212	5	0.489898	4.37255	1.41366	5.15385	1.64176	7.03846	1.45549	4.62	0.830294	5.22	0.910035	5.48	1.68622	6.88	1.45258	5.16	0.374166	4.8	1.08012	5.28571	1.89852
104	变相体罚	Disguised corporal punishment	negative	2.79808	1.03698	6.47115	1.06084	3.6875	1.96952	6.875	1.45317	2.90566	1.02402	6.28302	1.04472	4.5	2.16695	6.79167	0.977093	2.68627	1.04862	6.66667	1.05198	2.875	1.36135	6.95833	1.82921	2.57407	1.14269	6.64815	1.16809	3.36364	1.94068	7.45455	1.1434	3.04	0.85619	6.28	0.904411	3.96154	1.98959	6.38462	1.52517	2.89286	1.16553	6.32143	1.15642	4.18182	2.35874
105	标题音乐	Program music	neutral	5.22222	0.703526	4.31111	1.71653	4.9	1.44632	5.86	2.0703	5.04762	0.218218	4.42857	1.39898	4.38462	1.20256	5.69231	1.64364	5.375	0.923721	4.20833	1.97768	5.45833	1.50302	6.04167	2.47561	5.08333	0.28233	3.625	1.88386	4.95833	1.16018	6.16667	2.01444	5.38095	0.973457	5.09524	1.09109	4.84615	1.68979	5.57692	2.11987	5	0	4	1.7581	4.84615	0.5547
106	标准答案	Standard answer	neutral	5.37778	1.15383	5.17778	1.78744	3.86957	2.26675	7.86957	1.02434	5.13636	1.12527	5.31818	1.17053	3.59091	1.96781	7.27273	1.03196	5.6087	1.15755	5.04348	2.24577	4.125	2.52488	8.41667	0.653863	5.52174	1.08165	5.17391	1.61392	4.33333	2.17562	7.80952	1.24976	5.22727	1.23179	5.18182	1.99132	3.48	2.31157	7.92	0.812404	5.09091	0.301511	5.18182	0.40452	4.5	2.22361
107	别无出路	There is no way out	negative	3.34043	1.22077	5.70213	1.69289	3.29167	1.76199	6.83333	1.50649	3.375	1.34528	5.375	1.78916	3.72	1.96893	6.32	1.79629	3.30435	1.10514	6.04348	1.55149	2.82609	1.40299	7.3913	0.838783	2.95833	1.30148	5.95833	1.82921	3.04167	1.80529	6.79167	1.86452	3.73913	1.00983	5.43478	1.53226	3.54167	1.71893	6.875	1.07592	3.25	1.48477	5.66667	1.77525	3.53846	2.14536
108	别有天地	Like another world	positive	6.2766	1.1364	5.91489	1.42691	4.74	1.62644	6.26	1.89317	6.29167	0.80645	5.83333	1.27404	4.24	1.64012	6.24	1.71464	6.26087	1.42118	6	1.59545	5.24	1.47986	6.28	2.09205	6.47826	0.994053	6.13043	1.42396	4.84	1.74833	6.28	1.90438	6.08333	1.24819	5.70833	1.42887	4.64	1.52425	6.24	1.92094	6.08333	0.792961	5.83333	1.19342	4.46154	1.8081
109	宾客如云	Lots of guests	positive	6.40385	1.15346	5.88462	1.47673	4.66	1.9651	7.2	1.2454	6.37736	1.13046	6.22642	1.17082	4.16	1.99332	7.24	1.09087	6.43137	1.18752	5.52941	1.67753	5.16	1.8412	7.16	1.40475	6.4	1.39576	5.96364	1.40058	4.72	2.07204	7.4	1.25831	6.40816	0.814411	5.79592	1.56764	4.6	1.89297	7	1.22474	6.39286	1.3968	6.42857	1.06904	4.46154	2.06621
110	冰肌玉骨	Women's skin is as clean as jade	positive	6.14894	1.39843	5.53191	1.53015	4.55102	1.73279	6.44898	1.84911	5.73913	1.42118	5.3913	1.52968	4.52	1.5308	6.04	1.90351	6.54167	1.28466	5.66667	1.55106	4.58333	1.95419	6.875	1.72734	6.5	1.47196	5.27273	1.6671	4.76	1.47986	5.88	2.27889	5.84	1.28062	5.76	1.39284	4.33333	1.9708	7.04167	0.999094	6.2	1.68655	5.1	2.079	4.30769	1.84321
111	冰消瓦解	Dissolve	neutral	5.47826	1.32898	5.45652	1.48633	5.04255	1.86451	6.48936	1.62684	5.36364	1.39882	5.63636	1.29267	4.3913	1.85225	6	1.5667	5.58333	1.28255	5.29167	1.65448	5.66667	1.6854	6.95833	1.57367	5.47619	1.32737	5.38095	1.49921	5.18182	1.89326	6.5	1.81921	5.48	1.35769	5.52	1.50333	4.92	1.86905	6.48	1.47535	5.11111	1.2693	5.22222	1.39443	4.81818	1.99089
112	冰雪聪明	Extremely intelligent	positive	6.77778	1.19448	5.77778	1.58458	5.52083	1.79822	6.77083	1.51923	6.5	1.16149	5.92593	1.4647	4.73913	1.45282	6.3913	1.4058	7.05556	1.17227	5.62963	1.69679	6.24	1.80924	7.12	1.56312	7.01852	1.10728	5.7037	1.56168	5.78261	1.88189	7.13043	1.32474	6.53704	1.23949	5.85185	1.61838	5.28	1.72047	6.44	1.63503	6.66667	1.14354	6.11111	1.50214	4.90909	1.8684
113	兵强马壮	The army is strong	positive	7.13043	1.12761	6.82609	1.41899	4.27083	2.13122	7.33333	1.24342	7.18182	1.00647	7.36364	1.00216	3.88	1.81016	7.04	1.30639	7.08333	1.24819	6.33333	1.57885	4.69565	2.40142	7.65217	1.11227	7.20833	1.31807	6.79167	1.61458	5	2.24577	7.375	1.43898	7.04545	0.898532	6.86364	1.20694	3.54167	1.76879	7.29167	1.0417	7.25	1.21543	7.66667	0.984732	4.23077	2.12736
114	兵团战士	Legion of soldiers	neutral	5.39216	0.691631	5.31373	1.14304	3.81633	1.71602	6.81633	1.45306	5.2549	0.594748	5.33333	0.791623	4	1.69398	7	1.35133	5.52941	0.757706	5.29412	1.41837	3.64	1.75309	6.64	1.55134	5.42	0.730949	5.38	0.987473	3.86957	1.98413	6.82609	1.52709	5.36538	0.65765	5.25	1.28147	3.76923	1.47804	6.80769	1.41476	5.32	0.748331	5.24	0.879394	3.63636	1.74773
115	秉性难移	It's hard to change one's nature	negative	3.60377	1.1185	5.5283	1.36072	3.34043	1.59178	7.21277	1.23246	3.96226	1.0735	5.26415	1.30312	3.6087	1.75134	6.82609	1.02922	3.24528	1.0544	5.79245	1.37783	3.08333	1.41165	7.58333	1.31601	3.53846	1.27512	5.46154	1.33522	3.27273	1.63829	7.40909	1.40269	3.66667	0.951662	5.59259	1.39431	3.4	1.58114	7.04	1.05987	3.80769	1.23351	5.11538	1.42343	3.27273	1.3484
116	并列第一	Tied for first	positive	6.25532	2.06911	6.57447	1.77843	4.54	2.1779	7.26	1.33722	7.04348	1.3307	6.47826	2.15047	3.8	2.02073	6.84	1.37477	5.5	2.37743	6.66667	1.37261	5.28	2.11187	7.68	1.1804	6.31818	2.25486	6.54545	1.96946	4.54167	2.16653	7	1.50362	6.2	1.93649	6.6	1.63299	4.53846	2.23125	7.5	1.14018	7.1	1.19722	6.6	2.319	3.58333	1.97523
117	病病歪歪	Illness	negative	3.04167	1.25407	5.08333	1.52753	4.02041	1.6893	6.77551	1.50368	2.84	1.51877	4.96	1.45717	4.16667	1.6594	6.91667	1.01795	3.26087	0.864312	5.21739	1.62247	3.88	1.73973	6.64	1.86815	2.95833	1.36666	5.20833	1.74404	4.08696	1.67639	7.08696	1.44326	3.125	1.15392	4.95833	1.30148	3.96154	1.73161	6.5	1.52971	2.76923	1.7867	5	1.73205	4.54545	1.69491
118	拨云见日	Dispel the clouds and see the sun	positive	6.79245	1.03939	6.15094	1.45924	4.83333	2.13714	7.1875	0.981884	6.77778	0.984151	5.96296	1.50425	3.41667	1.58572	6.91667	0.928611	6.80769	1.10327	6.34615	1.39866	6.25	1.62186	7.45833	0.977093	6.88462	1.04138	6.44231	1.12744	4.86957	2.39895	7.13043	1.09977	6.7037	1.03941	5.87037	1.68284	4.8	1.91485	7.24	0.879394	6.81481	1.11068	6.33333	1.07417	3.09091	1.81409
119	波峰浪谷	Wave's peak and valleys	neutral	5.78723	1.24998	6.06383	1.24069	4	1.56347	6.32609	1.5924	5.84	1.34412	6	1.32288	3.86957	1.5755	6.30435	1.01957	5.72727	1.16217	6.13636	1.16682	4.13043	1.5755	6.34783	2.03623	6.08696	1.41142	6.17391	1.19286	3.95652	1.46095	6.21739	1.73091	5.5	1.02151	5.95833	1.30148	4.04348	1.69164	6.43478	1.47174	6.23077	1.42325	6.30769	1.37747	4.08333	1.24011
120	波浪滔天	Wave on the sky	neutral	4.95833	1.52927	6.08333	1.36574	3.31915	1.32051	7.17021	0.985088	5.08	1.68127	5.88	1.1299	3.27273	1.42032	7.18182	0.732664	4.82609	1.37021	6.30435	1.57926	3.36	1.25433	7.16	1.17898	4.88	1.9	6.2	1.38444	3.65217	1.49571	7.34783	1.0273	5.04348	1.02151	5.95652	1.36443	3	1.06322	7	0.932505	5	2.12132	6.15385	0.898717	3.54545	1.69491
121	波平如镜	Wave flat mirror	neutral	5.83333	1.09803	4.08333	2.06112	4.39583	1.5944	6.66667	1.65457	6.125	1.2959	5	1.74456	3.70833	1.42887	6.625	1.20911	5.54167	0.779028	3.16667	1.9708	5.08333	1.47196	6.70833	2.0319	5.8	1.29099	4.28	2.37206	4.08	1.6052	7.08	1.44106	5.86957	0.868873	3.86957	1.68696	4.73913	1.54383	6.21739	1.78266	6	1.68325	5.38462	1.89466	3.53846	1.56074
122	波涛汹涌	Roaring waves	neutral	5.12766	1.88376	6.7234	1.40963	3.12766	1.68906	7.34043	1.18462	5.13043	2.22188	6.78261	1.34693	3.33333	1.94862	7.125	1.07592	5.125	1.5411	6.66667	1.49395	2.91304	1.37883	7.56522	1.27301	4.47826	1.95098	6.69565	1.55021	3.375	1.88386	7.41667	1.34864	5.75	1.62186	6.75	1.2938	2.86957	1.45553	7.26087	1.00983	4.36364	2.61812	7.18182	1.60114	3.66667	2.18812
123	伯仲之间	Almost on a par; equally matched	neutral	5.43478	1.12846	4.8913	1.46406	4.94	1.55721	6.96	1.62832	5.30435	0.76484	5.04348	0.824525	4.6	1.70783	6.4	1.82574	5.56522	1.40861	4.73913	1.9121	5.28	1.33915	7.52	1.19443	5.27273	1.03196	4.63636	1.29267	5.12	1.61555	6.76	1.87705	5.58333	1.21285	5.125	1.59653	4.76	1.50776	7.16	1.34412	4.90909	0.301511	5	0	4.76923	1.73944
124	博古通今	Very learned	positive	6.74468	1.29326	5.91489	1.83954	5.38298	2.19241	7.23404	1.06756	6.73913	1.35571	5.6087	2.06131	4.26087	2.19953	6.78261	0.998022	6.75	1.25974	6.20833	1.58743	6.45833	1.58743	7.66667	0.963087	6.77273	1.54093	5.59091	1.94347	5.73913	2.11526	7.04348	1.3307	6.72	1.06145	6.2	1.73205	5.04167	2.25503	7.41667	0.717282	6.5	1.58114	4.9	2.18327	4.58333	2.2747
125	博学多能	Learning and multi ability	positive	7.17308	0.989678	5.96154	1.7062	5.35294	2.20747	7.2549	1.3393	7.47059	0.856807	6	1.93907	4.33333	2.09395	7.14815	1.26198	6.88679	1.03144	5.92453	1.46562	6.5	1.74456	7.375	1.43898	7.24528	1.0544	6.20755	1.67973	5.72	2.03142	7.16	1.49108	7.09804	0.922061	5.70588	1.71224	5	2.34947	7.34615	1.19808	7.53846	1.02882	6.53846	1.70249	4.64286	2.06089
126	博学多闻	Knowledgeable	positive	7.14894	0.999537	5.61702	1.93989	5.42857	2.01039	7.32653	0.965828	7.32	1.02956	6.16	1.90788	4.45833	1.66757	6.875	0.850192	6.95455	0.950051	5	1.82574	6.36	1.89033	7.76	0.879394	7.26087	1.13688	5.95652	2.01084	5.86957	1.8167	7.47826	0.897956	7.04167	0.858673	5.29167	1.85283	5.03846	2.12567	7.19231	1.02056	7.38462	1.19293	6.69231	1.88788	4.90909	1.97254
127	博学之士	Savant	positive	6.5102	1.19238	5.67347	1.68804	5.10638	1.91373	7.10638	1.23771	6.48	1.19443	6.12	1.39403	4.43478	1.82971	6.73913	1.09617	6.54167	1.21509	5.20833	1.86452	5.75	1.79976	7.45833	1.28466	6.64	1.28712	5.76	1.85472	5.17391	1.74908	6.78261	1.44463	6.375	1.09594	5.58333	1.5299	5.04167	2.09511	7.41667	0.928611	6.46154	1.45002	6.53846	1.19829	4.54545	1.86353
128	不打自招	Confess everything without having received a single blow of the bamboo	neutral	4.31915	1.16295	5.51064	1.33306	5.12	2.0468	7.16	1.33034	4.45833	1.21509	5.29167	1.33447	4.84615	1.80427	6.73077	1.4299	4.17391	1.11405	5.73913	1.32175	5.41667	2.28257	7.625	1.05552	4.31818	1.17053	5.45455	1.37069	5.04	1.98914	7.2	1.11803	4.32	1.1804	5.56	1.32539	5.2	2.14087	7.12	1.53623	4.36364	1.12006	5.27273	1.3484	4.84615	1.86396
129	不分皂白	Without distinguishing between right and wrong	negative	2.75	1.12041	6.1875	1.7704	4.72	1.65418	7.18	0.825363	2.95833	1.0417	5.45833	1.86452	4.42308	1.52769	7.03846	0.773603	2.54167	1.17877	6.91667	1.34864	5.04167	1.75646	7.33333	0.868115	2.69565	1.25896	6.21739	1.67757	4.48	1.68622	7.12	0.927362	2.8	1	6.16	1.88591	4.96	1.61967	7.24	0.723418	2.81818	0.98165	5.63636	1.68954	4.15385	1.62512
130	不服水土	Not accustomed to the climate of a new place	negative	3.75556	1.04785	5.66667	1.08711	3.27083	1.26726	7.04167	1.27092	3.56522	1.19947	5.47826	1.30974	3.56522	1.40861	6.86957	1.14035	3.95455	0.843873	5.86364	0.774317	3	1.08012	7.2	1.38444	3.80952	1.03049	5.7619	1.04426	3.56522	1.12112	6.69565	1.49042	3.70833	1.08264	5.58333	1.1389	3	1.35401	7.36	0.95219	3.5	1.2693	5.5	1.43372	3.81818	1.25045
131	不负所望	Worthy of hope	positive	6.73267	0.95803	6.36634	1.17237	6.01961	1.91301	7.15686	0.945993	6.55102	0.914267	6.32653	1.17947	5.34615	2.15299	7.07692	0.97665	6.90385	0.975376	6.40385	1.1759	6.72	1.33915	7.24	0.925563	6.62	0.966585	6.32	0.935469	6.16	1.81842	7.12	1.0924	6.84314	0.945993	6.41176	1.3737	5.88462	2.02636	7.19231	0.800961	6.33333	0.816497	6.20833	0.832971	6	1.95789
132	不负众望	Live up to expectations	positive	7.06383	1.14975	6.44681	1.63931	5.32653	1.98313	7.42857	1.13652	7.125	1.03472	6.29167	1.89918	5.41667	1.97631	7.45833	0.931533	7	1.2792	6.6087	1.33958	5.24	2.02649	7.4	1.32288	7.12	1.26886	6.4	1.84842	5.33333	2.03591	7.41667	1.41165	7	1.02353	6.5	1.40577	5.32	1.97315	7.44	0.820569	7.14286	1.09945	6.14286	2.17882	5.66667	2.26969
133	不告而别	Do not say goodbye	negative	3.42593	1.0608	5.84259	1.20871	5.20833	2.09313	7.35417	1.04147	3.46296	1.05889	5.77778	0.94503	5.79167	1.74404	7.08333	0.928611	3.38889	1.07135	5.90741	1.43104	4.625	2.28059	7.625	1.09594	3.43636	1.08463	5.90909	1.07622	5.58333	2.08341	7.29167	1.0417	3.41509	1.04576	5.77358	1.33937	4.83333	2.07818	7.41667	1.05981	3.5	1.10554	5.85714	0.970463	5.91667	1.62135
134	不慌不乱	Without confusion	neutral	5.86957	1.04581	4.41304	1.796	6.6875	1.20559	7.60417	0.916505	5.77273	0.972567	4.95455	1.61768	6.625	0.969648	7.33333	0.963087	5.95833	1.12208	3.91667	1.83958	6.75	1.42188	7.875	0.797414	5.70833	1.0417	4.375	1.71471	6.69565	1.32921	7.69565	0.926125	6.04545	1.0455	4.45455	1.9205	6.68	1.10755	7.52	0.918332	5.41667	0.996205	4.33333	1.66969	6.63636	1.12006
135	不吉之兆	Unlucky	negative	2.7767	1.15412	6.40777	1.26365	3.34	1.69766	6.56	1.86438	2.96154	1.34254	6.17308	1.41034	3.92	1.86905	6	1.89297	2.58824	0.898365	6.64706	1.05496	2.76	1.3	7.12	1.69115	2.58824	1.06163	6.52941	1.15504	3.48	1.89561	6.32	2.26789	2.96154	1.22012	6.28846	1.36247	3.2	1.5	6.8	1.35401	2.6	1.11803	6.36	1.11355	4.15385	2.1543
136	不计得失	Don't care about getting and losing	positive	6.13889	1.211	5.31481	1.5325	5.875	1.61936	7.35417	1.12021	6.43636	1.16688	5.32727	1.57591	6.125	1.42379	7.29167	1.12208	5.83019	1.18866	5.30189	1.50109	5.625	1.78916	7.41667	1.1389	5.98182	1.35388	5.52727	1.28891	5.69565	1.52061	7.43478	0.992063	6.30189	1.03003	5.09434	1.73498	6.04	1.7195	7.28	1.24231	6.17857	1.30678	5.75	1.04083	6.08333	1.50504
137	不计前嫌	Not reckon with the previous suspicion	positive	6.13043	1.16636	5.69565	1.56162	6.08333	1.49941	7.3125	1.1328	6.21739	0.951388	5.43478	1.72748	5.91304	1.62125	7	1.20605	6.04348	1.36443	5.95652	1.36443	6.24	1.39284	7.6	1	6.27273	1.20245	5.54545	1.65406	5.69565	1.60779	7.13043	1.32474	6	1.14208	5.83333	1.49395	6.44	1.32539	7.48	0.918332	6	0.942809	5.2	1.75119	5.54545	1.86353
138	不可言状	Indescribable	neutral	4.62376	1.02812	5.39604	1.09617	4.94	1.87801	6.76	1.39328	4.45283	1.11917	5.30189	0.972406	4.8	1.77951	6.64	1.55134	4.8125	0.891001	5.5	1.22039	5.08	1.99833	6.88	1.23558	4.54	1.05386	5.36	0.963836	5.28	1.64621	6.96	1.2741	4.70588	1.00587	5.43137	1.22074	4.6	2.06155	6.56	1.50222	4.2963	1.23459	5.37037	0.883531	5.30769	1.6525
139	不劳而食	Eat the bread of idleness	negative	2.89109	1.12161	6.08911	1.04975	5.10638	1.7844	6.91489	1.42691	2.78	1.1119	6.14	0.989949	5.17391	1.52709	6.86957	1.09977	3	1.13137	6.03922	1.11285	5.04167	2.0319	6.95833	1.70623	2.65385	1.0643	6.03846	1.13693	5.17391	1.85011	6.91304	1.83187	3.14286	1.13652	6.14286	0.957427	5.04167	1.75646	6.91667	0.928611	2.5	1.14018	6.26923	1.04145	5.36364	1.62928
140	不露锋芒	Hide one's candle under a bushel	neutral	5.57447	1.21126	4.55319	1.76695	5.83673	1.67515	7.38776	0.953422	5.625	1.43898	4.95833	1.70623	5.6	1.63299	7.08	0.909212	5.52174	0.947224	4.13043	1.76595	6.08333	1.71735	7.70833	0.907896	5.29167	1.12208	4.66667	1.73623	6.12	1.58955	7.44	1.12101	5.86957	1.25424	4.43478	1.82971	5.54167	1.74404	7.33333	0.761387	5.25	1.13818	5.41667	1.1645	5.92308	1.65638
141	不男不女	To look neither like a woman nor a man	negative	3.29787	1.42821	5.6383	1.71218	4.70588	1.06384	6.84314	1.31716	3	1.3484	5.08696	1.83187	4.51852	1.25178	6.48148	1.28214	3.58333	1.47196	6.16667	1.43456	4.91667	0.775532	7.25	1.25974	3.31818	1.49241	5.81818	1.56255	4.96	0.454606	6.48	1.38804	3.28	1.4	5.48	1.85113	4.46154	1.39229	7.19231	1.16685	2.9	1.59513	5.3	1.76698	4.92308	0.493548
142	不念旧恶	Forgive the past hatred	neutral	5.47525	0.995932	5.27723	1.18422	5.79592	1.85943	6.73469	1.81172	5.6	0.857143	5.3	1.34392	6.04	1.94679	7.08	1.03763	5.35294	1.11038	5.2549	1.01672	5.54167	1.76879	6.375	2.33708	5.5625	0.896951	5.41667	0.941554	6.26087	1.76371	7	2.08893	5.39623	1.08024	5.15094	1.36433	5.38462	1.87781	6.5	1.52971	5.73913	0.6887	5.47826	1.20112	6.08333	2.06522
143	不清不白	Obscure; unclear	negative	2.97826	0.999758	5.80435	1.22238	4.33333	1.56196	6.75	1.50884	2.875	0.991814	5.66667	1.43456	4.33333	1.60615	6.54167	1.5598	3.09091	1.01929	5.95455	0.950051	4.33333	1.55106	6.95833	1.45898	2.95455	1.13294	5.63636	1.17698	4.30435	1.36298	7.17391	0.886883	3	0.884652	5.95833	1.26763	4.36	1.75309	6.36	1.84572	2.83333	1.11464	5.41667	1.44338	4.27273	1.61808
144	不求上进	Do not seek to advance	negative	2.70833	1.09074	5.64583	1.87355	5.19231	1.88948	7.32692	0.943942	2.66667	1.23945	5.375	2.06023	5.07407	1.7743	7.14815	0.907393	2.75	0.944089	5.91667	1.66594	5.32	2.03552	7.52	0.962635	2.69565	1.10514	5.56522	2.04108	5.03704	1.74271	7.22222	1.05003	2.72	1.1	5.72	1.74452	5.36	2.05913	7.44	0.820569	2.36364	1.20605	5.72727	2.10195	4.8	1.82052
145	不善言谈	Not talkative	neutral	4.63462	0.763966	4.80769	1.15814	5.0625	1.56295	7.375	0.81541	4.78431	0.576671	4.7451	0.913086	5.20833	1.53167	7.08333	0.653863	4.49057	0.890606	4.86792	1.35927	4.91667	1.6129	7.66667	0.868115	4.7	0.707107	4.9	0.974156	5.08696	1.41142	7.34783	0.775107	4.57407	0.814997	4.72222	1.30914	5.04	1.7195	7.4	0.866025	4.83333	0.56466	4.66667	1.00722	5.27273	1.3484
146	不施脂粉	Do not apply fat	neutral	5.97872	1.45198	4.57447	1.47065	6.16667	1.71766	7	1.39909	5.875	1.2619	4.54167	1.5598	5.83333	1.6594	6.79167	0.977093	6.08696	1.64905	4.6087	1.4058	6.5	1.74456	7.20833	1.71893	6.16667	1.43456	4.54167	1.5598	6.375	1.76469	7.08333	1.71735	5.78261	1.47576	4.6087	1.4058	5.95833	1.68056	6.91667	1.01795	6	1.35401	4.23077	1.7867	6.08333	1.88092
147	不识大体	To fail to see the large issues	negative	3.12745	0.919229	5.94118	1.14168	4.82692	1.53036	7.15385	1.28924	3.25	0.947132	5.71154	1.24202	4.92857	1.33135	6.92857	1.38587	3	0.880631	6.18	0.98333	4.70833	1.75646	7.41667	1.1389	3.03846	1.02826	5.96154	1.17091	4.65385	1.44062	6.92308	1.44009	3.22	0.789988	5.92	1.12195	5	1.62481	7.38462	1.09825	3.28	0.936305	5.76	1.3	4.35714	1.08182
148	不通人情	Stuffy	negative	2.74468	1.24181	6.57447	1.41028	4.56	1.80882	7.1	1.35902	2.47826	1.20112	6.78261	1.20441	4.96	1.90351	6.68	1.40594	3	1.25109	6.375	1.58286	4.16	1.65025	7.52	1.19443	2.66667	1.27404	6.625	1.49819	4.58333	1.93181	7.04167	1.70623	2.82609	1.23038	6.52174	1.344	4.53846	1.72582	7.15385	0.967153	2.33333	1.37069	7	1.3484	4.91667	2.15146
149	不咸不淡	Not salty not pale	neutral	5.02128	0.82064	4.87234	1.36122	5.81633	1.31772	7.32653	0.987162	5.13043	0.919701	5.30435	0.97397	5.84	1.43411	7.04	0.934523	4.91667	0.717282	4.45833	1.5598	5.79167	1.21509	7.625	0.969648	5.04	0.789515	4.88	1.42361	6	1.53741	7.43478	1.07982	5	0.872872	4.86364	1.32001	5.65385	1.09334	7.23077	0.908083	5.15385	0.987096	5.46154	1.05003	5.91667	1.67649
150	不祥之物	Hoodoo	negative	2.97872	1.25956	5.93617	1.85805	3.6875	1.47542	6.9375	1.61649	3	1.446	5.56522	2.04108	3.95833	1.70623	6.33333	1.90347	2.95833	1.08264	6.29167	1.62799	3.41667	1.17646	7.54167	0.977093	3	1.1547	5.86364	1.88466	3.5	1.28537	6.58333	2.06243	2.96	1.3687	6	1.87083	3.875	1.6501	7.29167	0.907896	2.6	1.17379	5.2	2.04396	3.53846	1.6641
151	不孝之子	Unfilial son	negative	2.42308	1.09449	6.91827	1.33495	4.92	1.77097	6.84	1.44787	2.26923	1.13958	6.84615	1.487	4.76	1.73877	6.56	1.66032	2.57692	1.03557	6.99038	1.17361	5.08	1.82392	7.12	1.16619	2.34615	1.10053	6.875	1.14991	4.6	1.75594	7.16	1.1431	2.5	1.09365	6.96154	1.50765	5.24	1.76257	6.52	1.66132	2.07692	1.05539	7.03846	1.21592	4.38462	1.80455
152	不用客气	You are welcome	neutral	5.70192	0.868877	4.68269	1.38833	6.04082	1.29034	7.65306	0.969343	5.46	0.64555	4.96	1.02936	5.91667	1.1389	7.20833	1.02062	5.92593	0.987695	4.42593	1.62064	6.16	1.43411	8.08	0.702377	5.64151	0.85697	4.5283	1.40882	6.17391	1.23038	7.78261	1.04257	5.76471	0.885172	4.84314	1.36195	5.92308	1.3542	7.53846	0.904689	5.46154	0.646886	5	1.13137	6.18182	1.47093
153	不战自败	Self defeating	negative	3.5	1.50713	6.14151	1.35533	4	1.68325	6.79592	1.06026	3.4717	1.63617	6.16981	1.45094	4.12	2.00666	6.8	1.1547	3.5283	1.38124	6.11321	1.26583	3.875	1.2959	6.79167	0.977093	3.34615	1.53245	6.19231	1.32899	3.79167	1.53167	6.66667	1.30773	3.64815	1.48142	6.09259	1.39092	4.2	1.82574	6.92	0.759386	3.16	1.67531	6.36	1.43991	3.75	1.81534
154	不证自明	Self-evident	positive	6.02128	1.18852	5.78723	1.48816	5.1087	1.99141	6.80435	1.27575	6.17391	1.33662	5.69565	1.74342	4.34783	1.94489	6.47826	1.20112	5.875	1.03472	5.875	1.22696	5.86957	1.76595	7.13043	1.28997	6.12	1.45258	5.76	1.66533	5.78261	1.85758	6.95652	1.49174	5.90909	0.811177	5.81818	1.29601	4.43478	1.92652	6.65217	1.0273	6.23077	1.69085	5.69231	2.05688	5.09091	1.92117
155	不知高低	Can't tell high from low	negative	3.40426	1.15457	5.61702	1.48255	4.82979	1.2738	6.6383	1.35816	3.58333	1.24819	5.33333	1.49395	5.04348	1.52191	6.65217	1.0273	3.21739	1.04257	5.91304	1.44326	4.625	0.969648	6.625	1.63687	3.21739	1.16605	5.34783	1.64064	4.91304	1.34547	6.95652	1.52191	3.58333	1.1389	5.875	1.2959	4.75	1.22474	6.33333	1.12932	3.36364	1.12006	5.18182	1.60114	4.72727	1.73729
156	不知轻重	Have no appreciation of a thing's importance	negative	3.38298	1.01195	5.53191	1.06017	5	1.59079	6.98	1.26958	3.33333	1.00722	5.29167	1.19707	5.12	1.64114	6.84	1.06771	3.43478	1.03687	5.78261	0.850482	4.88	1.56312	7.12	1.45258	3.34615	0.977438	5.57692	1.20576	4.75	1.51083	6.75	1.59483	3.42857	1.07571	5.47619	0.872872	5.23077	1.65669	7.19231	0.849434	3.42857	0.937614	5.42857	1.39859	4.91667	1.92865
157	不知情者	Unwitting person	neutral	4.84444	0.73718	4.35556	1.52488	4.71429	1.85966	6.81633	1.46733	5	0	4.80952	1.03049	4.66667	1.16718	6.33333	1.37261	4.70833	0.999094	3.95833	1.78104	4.76	2.36784	7.28	1.42945	4.95833	0.550033	4.04167	1.73153	4.34783	1.84905	6.91304	1.70329	4.71429	0.902378	4.71429	1.18924	5.03846	1.84349	6.73077	1.25085	5	0	4.66667	1.37069	4.72727	1.67874
158	不足轻重	Worthless	neutral	4.53061	0.851973	5.16327	0.927183	4.89583	1.32472	6.79167	1.38316	4.6875	0.719227	5.16667	0.753244	5.08696	1.27611	6.78261	0.735868	4.38	0.945235	5.16	1.0759	4.72	1.36991	6.8	1.80278	4.44898	0.792181	5.12245	0.971096	4.91304	1.27611	6.78261	1.70445	4.61224	0.90867	5.20408	0.889279	4.88	1.39403	6.8	1.04083	4.58333	0.717282	5.08333	0.829702	5.18182	1.66242
159	不足为据	Cannot be taken as a proof or a basis for belief	neutral	4.375	1.12278	5.10417	1.56068	5.04082	1.59373	6.67347	1.34455	4.58333	0.974308	5.33333	0.963087	4.88	1.64114	6.4	1.44338	4.16667	1.23945	4.875	1.985	5.20833	1.5598	6.95833	1.19707	4.2	1.04083	5.2	1.60728	5.04167	1.36666	6.54167	1.444	4.56522	1.19947	5	1.53741	5.04	1.81384	6.8	1.25831	4.30769	1.18213	5.69231	0.947331	4.83333	1.52753
160	不足为凭	Cannot be taken as evidence	neutral	4.28261	1.08859	5.52174	1.11034	4.83333	1.35793	6.75	1.21165	4.43478	0.992063	5.47826	1.08165	4.6087	1.2699	6.56522	1.03687	4.13043	1.17954	5.56522	1.16096	5.04	1.42829	6.92	1.35154	4.16	1.28062	5.24	1.05198	4.73913	1.32175	6.73913	1.13688	4.42857	0.810643	5.85714	1.10841	4.92	1.41185	6.76	1.3	4.38462	1.1209	5.53846	1.1266	4.45455	1.36848
161	才德兼备	Have both talent and virtue	positive	7.17925	1.01228	5.98585	1.8185	5.54	2.02243	7.6	0.989743	7.24074	1.13162	6.48148	1.75629	4.73077	2.1644	7.5	0.860233	7.11538	0.877917	5.47115	1.75291	6.41667	1.44212	7.70833	1.12208	7.39623	1.02544	5.99057	1.80941	5.70833	2.17654	7.79167	0.977093	6.96226	0.960013	5.98113	1.84485	5.38462	1.89899	7.42308	0.986836	7.44444	1.01274	6.62963	1.64429	4.76923	2.45472
162	才高八斗	A man of great talents	positive	6.78723	1.6277	6.68085	1.19975	5	1.96783	6.83333	1.29374	6.88	1.87794	6.88	1.36382	4.6087	1.92446	6.26087	1.45282	6.68182	1.32328	6.45455	0.9625	5.36	1.97653	7.36	0.860233	7.12	1.50886	6.64	1.31909	5.08696	2.06514	6.78261	1.1264	6.40909	1.70878	6.72727	1.07711	4.92	1.91311	6.88	1.45258	7.42857	1.55486	7.07143	1.43925	4.54545	2.29624
163	财迷心窍	Mad about money	negative	2.87963	1.03867	6.21296	1.21556	4.97917	1.83917	7.4375	1.00861	2.67273	1.12307	6.16364	1.22872	5.04348	1.60902	7.17391	0.936734	3.09434	0.904352	6.26415	1.21134	4.92	2.05994	7.68	1.02956	2.625	1.01914	6.30357	1.21983	4.95833	1.80529	7.375	0.923721	3.15385	0.997735	6.11538	1.21516	5	1.91107	7.5	1.10335	2.31034	1.03866	6.37931	1.14685	5.16667	1.6967
164	财运亨通	Prosperous fortune	positive	6.9434	1.23312	6.58491	1.41332	4.85106	1.94466	6.93617	1.07145	6.7037	1.25337	6.31481	1.63481	4	1.70561	6.56522	1.23679	7.19231	1.1722	6.86538	1.08517	5.66667	1.83366	7.29167	0.750604	7.12727	1.2331	6.81818	1.3346	4.72727	1.88179	6.86364	1.3556	6.7451	1.21397	6.33333	1.46515	4.96	2.0306	7	0.763763	6.96429	1.37389	6.92857	1.48894	3.81818	1.60114
165	参差错落	All kinds of things are intertwined.	neutral	4.61702	1.3602	4.87234	1.48349	4.91489	1.17639	6.31915	1.65643	4.44	1.52971	5.2	1.32288	4.82609	0.777652	5.3913	1.52968	4.81818	1.13961	4.5	1.59613	5	1.47442	7.20833	1.25036	4.6087	1.37309	4.82609	1.69631	4.80952	0.402374	6.42857	1.71963	4.625	1.37722	4.91667	1.28255	5	1.54919	6.23077	1.63236	4.30769	1.4367	5	1.63299	4.8	0.421637
166	参考消息	Reference news	neutral	5.16667	0.377195	4.40476	1.54698	4.45833	1.63679	7.14583	1.27145	5.19048	0.402374	5.19048	0.402374	4.45833	1.41357	6.91667	1.17646	5.14286	0.358569	3.61905	1.85678	4.45833	1.86452	7.375	1.34528	5.27273	0.455842	4.59091	1.62302	4.56522	1.53226	7	1.4771	5.05	0.223607	4.2	1.47256	4.36	1.75309	7.28	1.06145	5.27273	0.467099	5.27273	0.467099	4.72727	1.19087
167	参众两院	Senate and house	neutral	5	0.377964	4.27907	1.53259	3.68	1.87834	5.86	2.29471	5	0	5.05	0.223607	3.24	1.73877	5.64	2.32522	5	0.522233	3.6087	1.85225	4.12	1.94336	6.08	2.28983	4.95238	0.218218	4.19048	1.83355	3.6	1.60728	5.6	2.3094	5.04545	0.485727	4.36364	1.21677	3.76	2.14631	6.12	2.2971	5	0	5.1	0.316228	3.23077	1.64083
168	残花败柳	Compromise one's honour by adultery	negative	3	1.01156	5.56818	1.71719	4.32	1.64677	6.78	1.51577	2.95455	1.0901	4.86364	1.83343	4.2	1.58114	6.72	1.06145	3.04545	0.950051	6.27273	1.2792	4.44	1.73397	6.84	1.88591	3.04348	1.06508	6	1.41421	4.54167	1.66757	7.125	1.2959	2.95238	0.973457	5.09524	1.92106	4.11538	1.63284	6.46154	1.65483	3.09091	1.04447	5.72727	1.61808	4.25	1.42223
169	残破不全	Incomplete	negative	3.02128	1.29362	5.3617	1.74985	4.14894	1.42918	6.78723	1.1021	2.76	1.2	5.12	1.81016	4	1.31426	6.3913	1.07615	3.31818	1.35879	5.63636	1.67745	4.29167	1.5458	7.16667	1.00722	3.13043	1.51671	5.34783	1.92138	4.13043	1.6041	6.86957	1.32474	2.91667	1.05981	5.375	1.61009	4.16667	1.27404	6.70833	0.858673	2.69231	1.31559	5.30769	2.01596	3.90909	1.6404
170	惨不忍闻	Can't bear to hear cruel stories	negative	2.57944	1.16585	6.76636	1.23303	3.78846	1.71883	6.84615	1.33409	2.33962	1.20804	6.88679	1.33964	3.75	1.75594	6.60714	1.61794	2.81481	1.08287	6.64815	1.11858	3.83333	1.711	7.125	0.850192	2.40741	1.09059	6.75926	1.25796	4	1.91833	6.80769	1.57529	2.75472	1.22326	6.77358	1.2191	3.57692	1.50128	6.88462	1.07059	2.11111	1.08604	6.96296	1.28547	4	1.92154
171	苍苍茫茫	The vast expanse of the sky	neutral	4.95455	0.913835	4.65909	1.34585	4.19149	1.51282	6.53191	1.62656	4.95	0.394034	4.95	0.394034	4.125	1.42379	6.375	1.20911	4.95833	1.19707	4.41667	1.76725	4.26087	1.62976	6.69565	1.98711	5	1.04447	4.47826	1.23838	3.91304	1.34547	6.73913	1.48377	4.90476	0.768424	4.85714	1.45896	4.45833	1.64129	6.33333	1.76109	5	0.447214	4.90909	0.53936	4.25	1.42223
172	草草了事	To get a job done hastily	negative	3.32353	0.891786	5.65686	1.1815	5.26087	2.00483	7.26087	0.953002	3.64	0.721676	5.36	0.963836	5.45455	2.01724	7.04545	0.785419	3.01923	0.939136	5.94231	1.30479	5.08333	2.01983	7.45833	1.06237	3.37736	1.06023	5.54717	1.27951	5.04348	1.98811	7.17391	1.11405	3.26531	0.670059	5.77551	1.06586	5.47826	2.04205	7.34783	0.775107	3.76923	0.862911	5.26923	0.77757	5.09091	2.0226
173	草船借箭	Borrow arrows with thatched boats	neutral	5.87234	1.43886	5.21277	2.02094	5.1	2.10199	7.12	1.47966	5.625	1.63687	4.91667	2.06243	4.80769	1.95998	6.61538	1.44435	6.13043	1.17954	5.52174	1.97414	5.41667	2.24416	7.66667	1.34056	5.79167	1.17877	5.75	2.04833	5	2.24577	7.375	1.43898	5.95652	1.69164	4.65217	1.87347	5.19231	2.00038	6.88462	1.50537	5.41667	1.08362	5.58333	1.92865	4.61538	2.14237
174	草木皆兵	Every bush and tree look like an enemy	neutral	4.19811	1.27556	5.64151	1.18071	3.8	1.90595	6.92	1.22624	4.13208	1.07485	5.5283	1.08493	3.84	1.81842	6.68	1.46401	4.26415	1.45643	5.75472	1.26955	3.76	2.02649	7.16	0.898146	4.21154	1.22613	5.55769	0.978463	3.70833	2.05319	6.875	1.56906	4.18519	1.33281	5.72222	1.35168	3.88462	1.79615	6.96154	0.823688	4.30769	1.08699	5.5	0.761577	3.41667	1.92865
175	草长莺飞	The grasses are tall and the nightingales are in the air	positive	6.40816	1.5127	5.53061	1.59559	4.58333	1.81991	6.75	1.39146	6.2	1.68325	5.36	1.68028	4.25	1.87083	6.20833	1.41357	6.625	1.31256	5.70833	1.51741	4.91667	1.74248	7.29167	1.16018	6.76923	1.39449	5.65385	1.52164	4.95833	1.60106	6.66667	1.52277	6	1.5667	5.3913	1.69864	4.20833	1.97768	6.83333	1.27404	6.57143	1.45255	5.35714	1.64584	5.16667	1.85047
176	侧耳细听	Fine hearing of the lateral ear	neutral	5.83333	1.07848	4.59375	1.57323	6.3	1.43214	7.5	0.974156	5.64	0.7	4.68	1.51987	6.24	1.42244	7.24	0.969536	6.04348	1.36443	4.5	1.65831	6.36	1.46856	7.76	0.925563	5.83333	1.12932	4.5625	1.67665	6.68	1.10755	7.48	1.00499	5.83333	1.0495	4.625	1.49819	5.92	1.63095	7.52	0.962635	5.46154	0.660225	4.53846	1.76141	6.69231	1.03155
177	侧目而视	Cast a side glance at	neutral	4.32609	1.2833	5.17391	1.27025	5.375	1.81747	7.27083	1.10588	4.63636	0.726731	5.27273	0.882735	5.91667	1.50121	7.08333	0.880547	4.04167	1.60106	5.08333	1.55806	4.83333	1.9708	7.45833	1.28466	4.20833	1.50302	5.25	0.84699	5.56522	1.85438	7.52174	1.03877	4.45455	1.01076	5.09091	1.63034	5.2	1.80278	7.04	1.13578	5	0.603023	5.16667	0.937437	5.91667	1.78164
178	测字先生	Fortune-teller	neutral	5.025	0.422902	4.625	1.37165	4.3125	1.1328	5.83333	2.00354	5.05556	0.235702	5.05556	0.416176	4.13043	1.32474	6.13043	1.7915	5	0.534522	4.27273	1.7507	4.48	0.918332	5.56	2.18098	5.04762	0.589592	4.90476	1.26114	4.47826	1.12288	5.43478	2.01869	5	0	4.31579	1.45498	4.16	1.1431	6.2	1.95789	5.11111	0.333333	5.11111	0.333333	4.27273	1.3484
179	插翅难飞	No possible escape	neutral	4.06383	1.62058	5.78723	1.41323	3	1.69706	7.21569	1.30098	4	1.89297	5.56	1.66032	3.53846	1.81617	7.07692	0.89098	4.13636	1.28343	6.04545	1.0455	2.44	1.38684	7.36	1.62993	3.69565	1.36298	6	1.31426	3.44	2.12289	7.28	1.30767	4.41667	1.79169	5.58333	1.50121	2.57692	1.02657	7.15385	1.31734	3.76923	1.69085	6.07692	1.70595	4.07692	2.21591
180	茶楼酒肆	Teahouses and wineshops	neutral	5.02083	1.43645	5.02083	1.66937	4.58333	1.51353	6.33333	1.76651	4.83333	1.40393	5.5	1.14208	4.16	1.49108	6.12	1.71561	5.20833	1.47381	4.54167	1.97768	5.04348	1.4295	6.56522	1.82971	4.69565	1.22232	4.69565	2.03235	4.66667	1.43456	5.75	2.00543	5.32	1.57374	5.32	1.21518	4.5	1.61515	6.91667	1.28255	4.81818	1.16775	5.45455	1.21356	4.07692	1.65638
181	茶余酒后	At one's leisure	neutral	5.66667	1.07848	4.48958	1.66787	5.33333	1.61553	7.25	1.13924	5.64	0.860233	5.12	1.58955	4.92	1.57903	7.04	1.09848	5.69565	1.29456	3.80435	1.49802	5.78261	1.56544	7.47826	1.16266	5.48	1.19443	4.82	1.6386	4.95652	1.3307	7.04348	1.36443	5.86957	0.919701	4.13043	1.6598	5.68	1.79629	7.44	0.869866	5.57143	0.937614	5.57143	1.39859	4.91667	1.83196
182	搽脂抹粉	Paint and powder one's face	negative	3.82979	1.43435	5.06383	1.52379	6.125	1.45317	6.75	1.71972	3.47826	1.344	5.34783	0.982052	6.21739	1.24157	6.78261	1.24157	4.16667	1.46456	4.79167	1.8877	6.04	1.6452	6.72	2.09205	3.83333	1.43456	4.625	1.61009	6.21739	1.59421	7.08696	1.53484	3.82609	1.46636	5.52174	1.30974	6.04	1.33791	6.44	1.85023	3.41667	1.37895	5.33333	0.984732	6.54545	1.12815
183	差之毫厘	The least bit of difference	neutral	4.23913	1.31968	5.63043	1.16158	4.48	1.84324	6.82	1.52114	4.64	1.49666	5.48	1.26227	4.8	1.89297	6.6	1.70783	3.7619	0.889087	5.80952	1.03049	4.16	1.772	7.04	1.30639	4.36364	1.329	5.81818	1.13961	4.5	1.79371	6.29167	1.85283	4.125	1.32902	5.45833	1.17877	4.46154	1.92314	7.30769	0.928191	4.61538	1.55662	5.69231	1.25064	4.66667	2.01509
184	柴米油盐	Fuel	neutral	5.07778	0.543093	4.07778	1.50739	5.42857	2.30036	7.79592	1.07973	5.25	0.607919	4.58333	1.31601	4.8	2.12132	7.64	1.15036	4.88095	0.384212	3.5	1.53297	6.08333	2.33902	7.95833	0.999094	4.8913	0.475694	3.97826	1.70879	5.20833	2.51913	8	1.14208	5.27273	0.550482	4.18182	1.29601	5.64	2.09921	7.6	1	5	0.426401	4.33333	1.66969	4.66667	2.38683
185	豺狼虎豹	Giant beasts such as wolf, tiger and leopard	negative	2.98958	1.23981	6.11458	1.53415	3.34615	1.58281	6.94231	1.37789	2.76	1.26754	6	1.68325	3.53571	1.97169	6.89286	1.44886	3.23913	1.1858	6.23913	1.38063	3.125	0.946963	7	1.31876	2.85417	1.36317	5.97917	1.57755	3.23077	1.55712	6.61538	1.74532	3.125	1.1156	6.25	1.51083	3.46154	1.63048	7.26923	0.77757	2.46154	1.26592	6.23077	1.64083	3.64286	1.94569
186	产科医院	Maternity hospital	neutral	5.03158	0.424079	4.67368	1.54673	4.14286	1.88193	7.22449	1.40335	4.97778	0.149071	4.91111	0.468179	3.70833	1.89918	7.08333	1.21285	5.08	0.565685	4.46	2.07227	4.56	1.80462	7.36	1.57797	4.9375	0.31999	4.29167	1.58394	4.375	1.71471	6.91667	1.66594	5.12766	0.494184	5.06383	1.42041	3.92	2.03961	7.52	1.04563	5	0	4.86957	0.548083	3.58333	1.92865
187	产销合同	Manufacturing and marketing contracts	neutral	5.08889	0.514438	4.16667	1.65831	4.375	1.9529	6.41667	1.79637	5.17391	0.716822	4.78261	1.47576	3.8	1.70783	6.6	1.35401	5	0	3.52273	1.62185	5	2.04495	6.21739	2.19414	5.08333	0.653863	4.0625	1.81965	4.125	2.15311	6.70833	1.70623	5.09524	0.300793	4.28571	1.48805	4.625	1.73988	6.125	1.87228	5.15385	0.898717	4.61538	1.85016	3.53846	1.85362
188	常规能源	Conventional energy	neutral	5.13	0.418149	4.59	1.44317	4.42553	1.88524	7.10638	1.35509	5.16667	0.476393	4.85417	1.12967	3.88	1.9	6.68	1.40594	5.09615	0.35753	4.34615	1.65547	5.04545	1.7037	7.59091	1.14056	5.07843	0.392078	4.4902	1.44738	4.16667	1.90347	7.16667	1.43456	5.18367	0.44128	4.69388	1.44632	4.69565	1.86924	7.04348	1.29609	5.16	0.553775	4.64	1.52425	3.46154	1.8081
189	常规战争	Conventional war	neutral	4.16327	1.41932	5.53061	1.73328	3.125	1.75796	6.6875	1.86976	4.28	1.64621	5.52	1.50333	2.95652	1.8703	6.65217	1.5553	4.04167	1.16018	5.54167	1.97768	3.28	1.67133	6.72	2.15097	3.84	1.51877	5.72	1.6207	3.21739	1.92959	6.47826	1.90381	4.5	1.25109	5.33333	1.85722	3.04	1.61967	6.88	1.85562	4.07692	1.84669	6	1.08012	2.81818	2.0405
190	敞开思想	Get things off one's chest	neutral	6	1.07497	5.3913	1.66638	6.41667	1.45622	7.3125	1.055	6	1.06904	4.90909	1.65929	5.70833	1.70623	7.29167	1.0417	6	1.10335	5.83333	1.57885	7.125	0.612372	7.33333	1.09014	5.90909	1.1916	5.59091	1.68068	6.36364	1.64882	7.36364	0.953463	6.08333	0.974308	5.20833	1.66757	6.46154	1.30325	7.26923	1.15092	5.8	0.918937	5.5	1.58114	5.63636	2.01359
191	唱独角戏	Solo	neutral	4.19231	1.20448	5.28365	1.27833	5.6383	1.86996	7	1.26834	4.47059	1.12317	5.2451	0.927429	5.33333	1.78561	6.70833	1.19707	3.92453	1.22434	5.32075	1.54641	5.95652	1.94184	7.30435	1.29456	4.15534	1.1441	5.36893	1.13751	5.54545	1.9935	7.27273	1.45346	4.22857	1.26535	5.2	1.40329	5.72	1.79165	6.76	1.05198	4.56863	0.943502	5.13725	0.87223	5.54545	2.20743
192	抄抄写写	Copy and write	neutral	4.70707	0.73196	4.82828	1.10694	6.25	1.87367	7.625	1.00266	4.95918	0.538485	4.71429	1.08012	6.13043	1.93777	7.3913	1.03305	4.46	0.813408	4.94	1.13227	6.36	1.84572	7.84	0.943398	4.68	0.740656	4.62	1.32311	6.52174	1.85545	7.69565	1.01957	4.73469	0.729598	5.04082	0.789493	6	1.89297	7.56	1.00333	4.92	0.640312	4.52	1.41774	6	2.09762
193	超级商场	Super market	neutral	5.76238	0.98131	5.43564	1.22814	5.10638	2.11859	7.3617	1.22342	5.44	0.760236	5.14	1.06924	4.43478	1.61881	7.08696	1.27611	6.07843	1.07412	5.72549	1.31268	5.75	2.36367	7.625	1.13492	5.87755	1.03345	5.59184	1.15323	5.08696	2.2343	7.34783	1.30065	5.65385	0.926402	5.28846	1.28851	5.125	2.04966	7.375	1.1726	5.45833	0.658005	5.375	0.710939	4.27273	1.79393
194	朝朝暮暮	Day and night	neutral	5.41304	1.25744	5.19565	1.73358	5.02128	1.42172	6.97872	1.3908	5	1.04447	4.91304	1.41142	5.21739	1.47576	6.73913	1.21421	5.82609	1.33662	5.47826	1.99703	4.83333	1.37261	7.20833	1.53167	5.30435	1.14554	5.17391	1.6693	5.18182	1.40192	6.95455	1.73143	5.52174	1.3774	5.21739	1.83294	4.88	1.45258	7	1.04083	4.91667	1.24011	5	1.80907	5.54545	1.86353
195	朝发夕至	Start at dawn and arrive at dusk	neutral	5.68182	1.00632	5.04545	1.61324	4.96	1.77235	6.76	1.79068	5.66667	0.795822	5.47619	1.07792	4.56	1.82757	6.76	1.78606	5.69565	1.18455	4.65217	1.92138	5.36	1.65529	6.76	1.83212	5.31818	0.838727	5.13636	1.61232	4.56	1.80462	6.56	1.98074	6.04545	1.0455	4.95455	1.64685	5.36	1.68028	6.96	1.59374	5.45455	0.8202	5.45455	0.8202	4.30769	2.01596
196	朝气勃勃	Full of youthful vigor	positive	7.18095	0.968553	6.53333	1.51319	6.30612	1.85072	7.61224	0.861596	7.27451	1.04074	6.92157	1.53419	5.68	2.07605	7.44	0.869866	7.09259	0.895871	6.16667	1.41087	6.95833	1.33447	7.79167	0.832971	7.34615	1.04571	6.63462	1.41461	6	2.14679	7.75	0.84699	7.01887	0.865816	6.43396	1.61137	6.6	1.5	7.48	0.87178	7.48	1.19443	7.28	1.2083	5.15385	2.54448
197	朝秦暮楚	Be quick to switch sides	negative	3.35417	1.46577	5.97917	1.48022	4.89583	1.40273	5.5625	2.37815	3.66667	1.27404	5.5	1.41421	4.66667	1.43456	5.25	2.02699	3.04167	1.60106	6.45833	1.41357	5.125	1.36135	5.875	2.69157	3.6087	1.52968	6.13043	1.54638	4.73913	1.76371	5.78261	2.27549	3.12	1.39403	5.84	1.43411	5.04	0.978093	5.36	2.498	4	1.09545	5.45455	1.03573	4.36364	1.74773
198	吵吵闹闹	Noisily	negative	3.31429	1.02201	5.92857	1.07289	4.875	1.82914	7.45833	0.988408	3.2	1.0611	5.78182	1.25744	5.08696	1.99802	7	0.953463	3.44	0.972269	6.09	0.806162	4.68	1.67631	7.88	0.832666	3.30189	1.18622	5.89623	1.05319	4.86957	1.96108	7.47826	1.16266	3.32692	0.833635	5.96154	1.1019	4.88	1.73973	7.44	0.820569	3.03571	1.13797	5.92857	1.2451	5.36364	2.37793
199	沉湎酒色	Overindulge oneself in wine and women	negative	2.6875	1.25742	5.95833	1.71301	4.67925	1.93921	6.32075	1.57838	2.875	1.454	5.54167	1.86452	4.35714	1.70434	6	1.63299	2.5	1.02151	6.375	1.46888	5.04	2.15019	6.68	1.46401	2.3913	1.2699	6.21739	1.65025	4.80769	1.85514	6.15385	1.66595	2.96	1.20692	5.72	1.76824	4.55556	2.04438	6.48148	1.50308	2.45455	1.4397	6.09091	1.70027	4.5	1.69842
200	称心如愿	As wished	positive	7.1875	1.24894	5.91667	2.28625	6.20408	1.77927	7.4898	0.892619	7.33333	1.27404	5.95833	2.66179	5.33333	1.6594	7.29167	0.858673	7.04167	1.23285	5.875	1.89536	7.04	1.48549	7.68	0.9	7.34783	1.26522	5.69565	2.51242	5.92	2.17792	7.68	0.9	7.04	1.24097	6.12	2.08806	6.5	1.21584	7.29167	0.858673	7.54545	1.29334	5.18182	3.02715	4.76923	1.96443
201	成名成家	Establish one's reputation as an authority	positive	6.5102	1.20973	5.7551	1.9951	5.10204	1.97109	6.73469	1.36589	6.6	1.22474	5.68	2.28619	4.125	1.70198	6.95833	0.80645	6.41667	1.21285	5.83333	1.6854	6.04	1.7673	6.52	1.73494	6.23077	1.24283	5.57692	2.19405	4.69565	2.00986	6.91304	1.20276	6.82609	1.11405	5.95652	1.77042	5.46154	1.90223	6.57692	1.50128	6.5	1.28602	5.85714	2.56776	4.18182	2.0405
202	成千成百	Hundreds or thousands of	neutral	5.26596	0.765074	4.88298	1.44167	4.54348	1.40959	6.95652	1.38173	5.25	0.675664	5.125	0.850192	4.70833	1.48848	6.45833	1.61458	5.28261	0.86374	4.63043	1.85997	4.36364	1.329	7.5	0.801784	5.1875	0.639506	4.6875	1.50226	4.42857	1.2873	7	1.48324	5.34783	0.884652	5.08696	1.37883	4.64	1.52425	6.92	1.32035	5.30769	0.85485	5.15385	0.987096	4.45455	1.63485
203	成千累万	Thousands upon thousands	neutral	4.91304	1.00722	5.19565	1.60027	4.7551	1.57494	6.65306	1.40758	5.17391	1.07247	5.26087	1.38883	4.6	1.60728	6.44	1.44568	4.65217	0.884652	5.13043	1.8167	4.91667	1.55806	6.875	1.36135	4.78261	0.951388	5.21739	1.65025	4.25	1.56733	6.5	1.64184	5.04348	1.06508	5.17391	1.58551	5.24	1.45144	6.8	1.1547	5	0.894427	4.72727	1.55505	4.25	1.76455
204	成群结伙	In groups	negative	3.9375	1.22746	5.47917	1.05164	5.24	1.97495	6.98	1.59706	3.875	1.03472	5.58333	0.717282	5.16	1.97231	6.8	1.5	4	1.41421	5.375	1.31256	5.32	2.01494	7.16	1.7	4	1.11803	5.52	0.653197	5.2	1.95789	7.12	1.66633	3.86957	1.35862	5.43478	1.37597	5.28	2.03142	6.84	1.54596	4.07692	0.759555	5.46154	0.660225	5.07692	2.01914
205	成渝铁路	Chengdu-chongqing railway	neutral	5.07143	0.260661	4.5	1.32977	4.35417	1.81588	6.29167	1.98889	5	0	5	0.57735	3.75	1.70038	6.625	1.46888	5.13043	0.34435	4.08696	1.62125	4.95833	1.75646	5.95833	2.38618	5	0	4.42105	1.53897	4.32	1.8868	6.28	1.96893	5.13043	0.34435	4.56522	1.16096	4.3913	1.77711	6.30435	2.05459	5	0	5.25	0.707107	3.61538	1.7097
206	诚诚恳恳	Sincerely	positive	6.64583	1.12021	5.125	1.97457	6.55102	1.51467	7.59184	0.887843	6.83333	1.12932	5.33333	2.18028	6.32	1.70098	7.52	0.87178	6.45833	1.10253	4.91667	1.76725	6.79167	1.28466	7.66667	0.916831	6.69231	1.22537	5.34615	2.01876	6.28	1.4	7.52	1.04563	6.59091	1.00755	4.86364	1.93453	6.83333	1.60615	7.66667	0.701964	6.71429	1.32599	5.42857	2.31099	6.46154	1.5064
207	诚惶诚恐	With profound respect and humility	negative	3.26087	1.23711	6.06522	1.28931	4.14583	1.76237	6.85417	1.62415	3.45455	1.37069	6	1.02353	4.26087	1.68462	6.21739	1.75697	3.08333	1.10007	6.125	1.51263	4.04	1.85921	7.44	1.26095	2.96	1.2741	6.24	1.33167	4.45833	1.84106	6.70833	1.87615	3.61905	1.11697	5.85714	1.23635	3.83333	1.6594	7	1.35133	3.07692	1.32045	6.23077	0.926809	4.66667	2.10339
208	城门失火	Gate fire	negative	2.8835	1.17407	6.85437	1.18328	3.06522	1.37279	6.69565	1.57578	2.4902	1.15538	7.05882	1.15606	2.86364	1.45718	6.54545	1.50324	3.26923	1.06854	6.65385	1.18627	3.25	1.2938	6.83333	1.6594	2.54717	1.06637	7.03774	1.19232	3.09091	1.306	6.54545	1.62502	3.24	1.18769	6.66	1.1537	3.04167	1.45898	6.83333	1.55106	2.07692	0.844894	7.34615	1.05612	3.09091	1.6404
209	城乡交流	Urban and rural communication	neutral	5.55769	0.798383	4.86538	1.32238	4.63265	1.78762	6.63265	1.6033	5.41176	0.638012	5.07843	0.934733	4.54167	1.74404	6.58333	1.28255	5.69811	0.911147	4.66038	1.59257	4.72	1.86011	6.68	1.8868	5.50943	0.846319	5.01887	1.32274	4.95652	1.8703	6.82609	1.64184	5.60784	0.750425	4.70588	1.31597	4.34615	1.6957	6.46154	1.58065	5.30769	0.549125	5.19231	0.980581	4.54545	1.96792
210	乘隙而入	Take advantage of the crack and enter	negative	3.5	1.32086	5.95833	1.41359	5.40816	1.91397	6.95918	1.20691	3.6	1.63299	6	1.32288	5.20833	2.26465	6.79167	1.31807	3.3913	0.891328	5.91304	1.53484	5.6	1.52753	7.12	1.0924	3.16667	1.0495	6.33333	1.27404	5.08333	2.1451	6.75	1.48177	3.83333	1.49395	5.58333	1.47196	5.72	1.64621	7.16	0.85049	3.07692	1.32045	6.30769	1.18213	5	2.7303
211	吃粉笔灰	Eat chalk	negative	3.02128	1.29362	5.61702	1.63592	4.71429	1.8143	6.89796	1.58436	2.84	1.31276	5.24	1.87705	5	1.84155	6.54167	1.21509	3.22727	1.26986	6.04545	1.21409	4.44	1.78139	7.24	1.83212	3.13043	1.6598	5.82609	1.69631	4.29167	1.57367	7.125	1.51263	2.91667	0.829702	5.41667	1.58572	5.12	1.96469	6.68	1.65126	2.69231	1.54837	5.69231	2.01596	4.83333	1.80067
212	吃苦耐劳	Endure hardships and be capable of hard work	positive	6.66346	1.12871	5.50962	1.5765	6.125	1.89765	7.79167	0.898186	6.76923	1.23058	5.90385	1.54995	5.66667	2.07818	7.54167	0.832971	6.55769	1.01775	5.11538	1.51662	6.58333	1.6129	8.04167	0.907896	6.54717	1.29446	5.62264	1.44417	6.375	1.78916	7.875	0.946963	6.78431	0.923336	5.39216	1.70972	5.875	2.00678	7.70833	0.858673	6.55556	1.42325	6.03704	1.37229	5.84615	2.11527
213	吃里扒外	Eat in pick outside	negative	2.35556	0.957163	6.51111	1.54658	4.32653	1.78405	7	1.32288	2.26087	0.915393	6.17391	1.92241	4.33333	1.83366	6.75	1.18872	2.45455	1.01076	6.86364	0.940894	4.32	1.77294	7.24	1.42244	2.18182	0.795006	6.86364	1.24577	4	1.67874	7.3913	1.33958	2.52174	1.08165	6.17391	1.74908	4.61538	1.85638	6.65385	1.23101	2.27273	0.64667	6.45455	1.4397	3.90909	2.0226
214	吃青春饭	Depend on youth to make a living	negative	3.78723	1.41323	5.57447	1.28104	4.95833	1.99956	7.22917	1.27562	3.75	1.51083	5.625	1.1726	5.52	1.89561	7.04	1.20692	3.82609	1.33662	5.52174	1.41001	4.34783	1.96813	7.43478	1.34252	3.41667	1.50121	5.95833	1.19707	5	2.04302	7.16667	1.30773	4.17391	1.23038	5.17391	1.26678	4.91667	1.99819	7.29167	1.26763	3.33333	1.82574	6.33333	1.07309	5.61538	2.02231
215	吃商品粮	Eat commodity grain	neutral	4.91304	0.724985	4.80435	1.73358	4.36	2.12622	6.72	1.94873	5.09091	0.294245	4.86364	1.28343	3.64	1.8	7.08	1.15181	4.75	0.944089	4.75	2.09035	5.08	2.21585	6.36	2.48126	4.84	0.8	4.56	2.04287	4.64	2.13854	6.72	1.86011	5	0.632456	5.09524	1.26114	4.08	2.11975	6.72	2.07204	5.15385	0.375534	4.76923	1.69085	3.76923	1.73944
216	吃香喝辣	Feasting oneself	neutral	5.77143	1.63647	5.8	1.20416	5.92	1.93612	7.36	1.04511	5.28846	1.40498	5.32692	1.04264	5.36	2.07926	7.28	1.17331	6.24528	1.71986	6.26415	1.17916	6.48	1.63605	7.44	0.916515	6.19608	1.52341	6	0.87178	6	1.84155	7.41667	0.928611	5.37037	1.65171	5.61111	1.43299	5.84615	2.05314	7.30769	1.15825	5.6	1.11803	5.56	0.506623	5.33333	2.14617
217	吃哑巴亏	Be unable to speak out about one's grievances	negative	3.02174	1.10532	6.04348	1.77584	3.52083	1.6372	7.08333	1.21748	3.13636	0.940894	5.59091	1.86851	4.17391	1.82538	6.65217	1.07063	2.91667	1.24819	6.45833	1.61458	2.92	1.18743	7.48	1.22882	2.69565	1.14554	5.91304	2.06514	3.52174	1.67521	6.95652	1.4295	3.34783	0.982052	6.17391	1.46636	3.52	1.63605	7.2	1	2.90909	0.94388	5.54545	2.25227	3.72727	2.00454
218	痴男怨女	Young men and wowen who are deeply in love but unable to fufil their passion	negative	3.95146	1.0699	5.45631	1.03637	4.57447	1.62514	6.74468	1.4366	3.98077	0.999811	5.17308	0.90144	4.65217	1.5553	6.04348	1.4295	3.92157	1.14618	5.7451	1.09258	4.5	1.71945	7.41667	1.10007	3.66667	0.972968	5.68627	0.73458	4.47826	1.75472	6.69565	1.71715	4.23077	1.09572	5.23077	1.23058	4.66667	1.52277	6.79167	1.14129	3.73077	1.04145	5.53846	0.811456	4.36364	1.80404
219	赤日炎炎	Red sun	negative	3.83654	1.34461	5.83654	1.20767	2.92308	1.51911	7.5	1.16316	4.12963	1.3465	5.64815	1.21558	3.14815	1.74761	7.2963	1.17063	3.52	1.28158	6.04	1.17734	2.68	1.21518	7.72	1.13725	3.56604	1.50012	6	1.30089	3.15385	1.80427	7.26923	1.37281	4.11765	1.1072	5.66667	1.08934	2.69231	1.15825	7.73077	0.874423	4.21429	1.52406	5.75	1.26564	3.35714	2.09788
220	充耳未闻	Unheard of the ears	negative	3.89362	1.16533	5.51064	1.44271	5.25	1.53233	6.57692	1.27335	4.21739	1.24157	4.95652	1.39734	4.82143	1.49204	6.39286	1.42307	3.58333	1.01795	6.04167	1.30148	5.75	1.45213	6.79167	1.06237	3.72727	1.20245	5.40909	1.73642	5.38462	1.44435	6.30769	1.43581	4.04	1.13578	5.6	1.1547	5.11538	1.63284	6.84615	1.04661	4.1	1.1005	4.4	1.50555	5	1.4676
221	抽刀断水	Draw a knife to cut off the running water.	neutral	4.53191	1.63987	5.78723	1.55949	4.16667	1.76651	6.14583	1.57087	3.91304	1.53484	5.65217	1.43364	4.29167	1.70623	5.75	1.48177	5.125	1.5411	5.91667	1.69184	4.04167	1.85283	6.54167	1.58743	4.13043	1.6598	6	1.3484	3.91667	1.88626	5.95833	1.80529	4.91667	1.55806	5.58333	1.74248	4.41667	1.63964	6.33333	1.30773	3.81818	1.66242	5.63636	1.50151	3.91667	2.19331
222	愁肠百结	Sorrow	negative	3.08511	1.26542	5.74468	1.42139	4.19231	1.54715	6.38462	1.61067	3.33333	1.40393	6.16667	1.09014	4.11111	1.42325	6.03704	1.60484	2.82609	1.07247	5.30435	1.60779	4.28	1.69607	6.76	1.56205	2.66667	1.12932	5.83333	1.60615	3.96154	1.39945	6.23077	1.68066	3.52174	1.27456	5.65217	1.22877	4.42308	1.67745	6.53846	1.55514	2.92308	1.18754	6.38462	0.960769	3.92857	1.49174
223	愁眉紧锁	Worried frown	negative	2.89362	1.23771	5.55319	1.69152	4.97959	1.80843	7.14286	1.59426	3.04348	1.22394	5.17391	1.85011	5.44	1.70978	6.68	1.79629	2.75	1.25974	5.91667	1.47196	4.5	1.81779	7.625	1.20911	2.91304	1.31125	5.78261	1.59421	5.32	1.8421	7.2	1.29099	2.875	1.191	5.33333	1.78561	4.625	1.73988	7.08333	1.88626	2.81818	1.25045	5.72727	1.61808	5.61538	1.98068
224	愁眉苦脸	A distressed expression	negative	3.1028	0.999383	5.62617	1.2016	5.07843	1.90623	7.43137	1.00509	3.24074	1.08045	5.59259	1.12466	5.42308	1.79272	7.46154	0.859338	2.96226	0.897909	5.66038	1.28517	4.72	1.98997	7.4	1.1547	3.03636	1.03573	5.76364	1.08804	5.26923	1.77894	7.19231	1.13205	3.17308	0.96449	5.48077	1.30595	4.88	2.04776	7.68	0.802081	3.21429	1.03126	5.78571	1.06657	5.21429	1.76193
225	丑态毕露	Show the cloven hoof	negative	2.81111	1.33693	6.04444	1.08619	4.55102	1.95854	6.95918	1.51326	2.84	1.62481	5.84	1.21381	5.04167	2.05319	6.70833	1.57367	2.775	0.89553	6.3	0.864505	4.08	1.77764	7.2	1.44338	2.65909	1.55369	6.13636	0.940894	3.95833	1.94443	6.75	1.96159	2.95652	1.10693	5.95652	1.22394	5.12	1.83303	7.16	0.898146	2.38462	1.75777	6.23077	0.926809	4.16667	2.2088
226	臭不可闻	Stinky	negative	2.10204	0.847666	6.5102	1.5562	3.7234	1.33028	6.70213	1.36597	1.84615	0.880559	6.65385	1.87494	4.04167	1.5458	6.66667	1.0495	2.3913	0.722315	6.34783	1.11227	3.3913	0.988071	6.73913	1.65742	2.04	0.934523	6.28	1.88237	3.72727	1.24142	7	1.19523	2.16667	0.761387	6.75	1.11316	3.72	1.42945	6.44	1.47422	1.78571	0.892582	6.35714	2.16997	4.18182	1.53741
227	臭名昭彰	Notorious	negative	2.6383	1.30926	6.38298	1.67531	4.34043	1.63224	6.93617	1.32541	2.65217	1.43364	6.04348	1.98811	4.26087	1.57299	6.6087	1.49967	2.625	1.20911	6.70833	1.26763	4.41667	1.71735	7.25	1.07339	2.73913	1.42118	6.6087	1.4058	4.56522	1.37597	6.78261	1.73091	2.54167	1.21509	6.16667	1.90347	4.125	1.84891	7.08333	0.775532	2.63636	1.5667	6.54545	1.80907	4.36364	1.50151
228	臭气冲天	Stench	negative	2.18868	1.01525	6.81132	1.36705	4.04255	1.80528	7.04255	0.999075	2.16667	1.11169	6.62963	1.62871	4.17391	1.74908	6.82609	0.886883	2.21154	0.914728	7	1.00976	3.91667	1.88626	7.25	1.07339	2.21154	1.01627	6.80769	1.1722	4.04348	1.66456	7	1	2.16667	1.02331	6.81481	1.54277	4.04167	1.96666	7.08333	1.01795	2.25926	1.1633	6.77778	1.36814	4.36364	1.74773
229	出口伤人	Offend by rude remarks	negative	2.56311	0.996759	6.51942	1.18595	5.47826	2.10543	7.43478	1.02528	2.42593	1.05691	6.42593	1.32611	5.56522	2.1283	7.13043	0.919701	2.71429	0.912871	6.62245	1.01309	5.3913	2.12644	7.73913	1.05388	2.62745	1.13068	6.5	1.08167	4.90909	2.20193	7.5	1.10195	2.5	0.851757	6.53846	1.29041	6	1.91107	7.375	0.969648	2.25926	1.19591	6.66667	1.14354	4.81818	2.35874
230	出生入死	Go through fire and water	neutral	5.42553	1.89673	6.46809	1.44239	5.14583	2.18301	7.35417	1.36038	5.20833	2.10546	6.66667	1.23945	5.34783	2.16603	7.04348	1.63702	5.65217	1.66812	6.26087	1.62976	4.96	2.22636	7.64	0.994987	5.54167	2.26465	6.29167	1.5458	5.48	2.27523	7.12	1.69115	5.30435	1.4596	6.65217	1.33514	4.78261	2.0661	7.6087	0.838783	5	2.51661	6.76923	1.48064	5.53846	2.40192
231	初级小学	Primary school	neutral	5.02439	0.272746	4.4878	1.48529	4.68	1.92131	7.52	1.34377	5	0	5.10526	0.458831	4.15385	1.7133	7.30769	1.22537	5.04545	0.37509	3.95455	1.83815	5.25	2.00543	7.75	1.45213	5	0	4	1.89737	4.72	1.64621	7.4	1.5	5.05	0.394034	5	0.561951	4.64	2.19621	7.64	1.18603	5	0	5.2	0.632456	3.92308	1.25576
232	楚汉相争	Competition between chu and han; chu-han contention	neutral	4.77083	1.25883	5.79167	1.83301	3.625	1.64543	6.58333	1.63516	4.58333	1.1389	5.41667	1.55806	3.56522	1.77933	6.3913	1.61637	4.95833	1.36666	6.16667	2.03591	3.68	1.54704	6.76	1.66533	4.82609	1.33662	5.34783	2.10214	3.91304	1.44326	6.3913	1.92446	4.72	1.2083	6.2	1.47196	3.36	1.8	6.76	1.33167	4.72727	1.19087	4.90909	1.30035	3.72727	1.61808
233	楚河汉界	The han boundary of the chu river	neutral	5	0.690066	4.83721	1.19384	4.39216	1.77852	6.76471	1.65636	5.04762	0.384212	4.90476	0.300793	4.11111	1.88788	6.40741	1.62337	4.95455	0.898532	4.77273	1.65994	4.70833	1.62799	7.16667	1.63299	4.80952	0.813575	4.7619	0.995227	4.34615	1.76505	6.23077	1.92474	5.18182	0.501081	4.90909	1.37699	4.44	1.82757	7.32	1.10755	5	0	5	0	4.14286	1.91581
234	触景伤情	Feel very depressed at the prospect	negative	3.65094	1.01458	5.75472	1.29329	5.08163	2.10987	7.38776	1.18702	3.81132	1.05715	5.79245	1.14956	5.64	1.7767	7.08	1.22202	3.49057	0.953186	5.71698	1.43282	4.5	2.30312	7.70833	1.08264	3.65385	0.926402	5.61538	1.31587	5.04	2.24499	7.64	1.22066	3.64815	1.10158	5.88889	1.26888	5.125	2.00678	7.125	1.1156	3.84615	1.08415	5.69231	1.01071	5.76923	1.92154
235	触手可及	In touch with the hands	neutral	5.90566	1.02844	5.35849	1.55035	6.68085	1.32051	7.44681	1.0593	5.81132	0.941697	5.13208	1.45494	6	1.2792	7.04348	1.06508	6	1.1094	5.58491	1.62237	7.33333	1.00722	7.83333	0.916831	5.76923	1.00226	5.48077	1.46181	6.69565	1.36298	7.56522	1.16096	6.03704	1.04544	5.24074	1.63609	6.66667	1.30773	7.33333	0.963087	5.53846	0.989172	5.34615	1.46812	6.27273	1.48936
236	穿云破雾	Pierce the clouds and mist	positive	6.27083	1.18033	6	1.65027	5.21277	2.02094	6.29787	1.55919	6.29167	1.33447	6.45833	1.35066	4.73913	2.00493	6.34783	1.66812	6.25	1.03209	5.54167	1.81729	5.66667	1.9708	6.25	1.48177	6.28	1.2083	5.96	1.67033	4.95833	2.0319	5.95833	1.70623	6.26087	1.17618	6.04348	1.66456	5.47826	2.01967	6.65217	1.33514	6.30769	1.25064	6.61538	1.1209	4.33333	1.92275
237	传呼电话	Paging telephone	neutral	5.06667	0.53936	4.48889	1.40813	5.08163	2.04976	6.77551	1.55811	5.09524	0.70034	4.90476	1.22085	4.375	1.9068	6.83333	1.09014	5.04167	0.358641	4.125	1.48361	5.76	1.98494	6.72	1.92614	5.12	0.725718	4.6	1.47196	5.08333	2.10417	6.91667	1.41165	5	0	4.35	1.34849	5.08	2.03961	6.64	1.70489	5.15385	0.898717	4.84615	1.57301	4	1.53741
238	传家之宝	Heirloom	positive	6.57143	1.29099	5.73469	1.70508	4.98	2.28116	7.22	1.26636	6.42308	1.4191	5.76923	1.70429	4.26923	2.1828	7.03846	1.18257	6.73913	1.13688	5.69565	1.74342	5.75	2.17196	7.41667	1.34864	6.52	1.47535	6.04	1.45717	5.125	2.40131	7.41667	1.21285	6.625	1.09594	5.41667	1.90917	4.84615	2.20349	7.03846	1.3109	6.28571	1.63747	6.28571	1.48989	4.46154	2.36697
239	传经送宝	Pass on experience	positive	6.47917	1.07168	6.04167	1.50118	5.5	1.65027	6.35417	1.83917	6.66667	1.09014	6.16667	1.57885	5.04348	1.74456	6.86957	1.05763	6.29167	1.0417	5.91667	1.44212	5.92	1.46969	5.88	2.26053	6.3913	0.988071	5.95652	1.39734	5.3913	1.8025	6.08696	2.02064	6.56	1.15758	6.12	1.61555	5.6	1.52753	6.6	1.65831	6.63636	1.12006	6	1.78885	4.72727	2.05382
240	传真电报	Facsimile telegram	neutral	4.95652	0.294884	4.28261	1.50056	4.98	1.69621	6.54	1.65628	5	0.294884	5.04167	0.358641	4.2	1.52753	6.76	1.26754	4.90909	0.294245	3.45455	1.81861	5.76	1.50776	6.32	1.97315	5	0.301511	3.95652	1.69164	4.66667	1.6594	6.16667	1.88049	4.91304	0.288104	4.6087	1.23359	5.26923	1.71015	6.88462	1.36607	5	0.426401	5.08333	0.514929	4	1.70561
241	传真电话	Fax phone	neutral	5	0.220863	4.28571	1.53473	5.36735	2.26103	6.97959	1.73793	5	0	5.05263	0.229416	3.95833	1.96666	7.375	0.969648	5	0.301511	3.65217	1.84905	6.72	1.6207	6.6	2.19848	5	0	3.9	1.86096	5.04	2.3	7.32	1.4922	5	0.308607	4.63636	1.09307	5.70833	2.21613	6.625	1.92946	5	0	5.11111	0.333333	3.84615	2.23033
242	传宗接代	Have a son to carry on his family name	neutral	5.8913	1.40203	5.84783	1.63255	4.35417	2.10864	7.41667	1.18202	6.17391	1.11405	6.04348	1.22394	4.45833	2.37705	7.25	1.25974	5.6087	1.61637	5.65217	1.96813	4.25	1.84744	7.58333	1.10007	5.58333	1.17646	5.41667	1.50121	4.43478	2.23253	7.6087	1.23359	6.22727	1.57153	6.31818	1.67293	4.28	2.03142	7.24	1.12842	6.15385	1.28103	5.92308	1.32045	4.54545	2.80584
243	闯荡江湖	Make a living away from home	neutral	5.95327	1.15238	6.09346	1.29245	5.24	2.046	7	1.57791	5.57407	1.12605	5.51852	1.02314	5.12	2.02731	6.52	1.8735	6.33962	1.05509	6.67925	1.28263	5.36	2.09921	7.48	1.04563	6.27273	1.00838	6.34545	1.07528	5.4	2.19848	7	1.93649	5.61538	1.20707	5.82692	1.45145	5.08	1.91311	7	1.1547	6	1.05409	5.85714	0.931518	5.46154	2.40192
244	创先争优	Strive for excellence	positive	6.68571	1.10344	6.01905	1.53786	5.64	2.01788	7.18	1.64986	6.89091	1.10005	6.18182	1.66768	5.16	2.2301	7.32	1.37598	6.46	1.07305	5.84	1.37559	6.12	1.69115	7.04	1.90351	6.69811	1.21821	5.96226	1.50591	5.96	1.79072	7.12	1.81016	6.67308	0.98461	6.07692	1.58233	5.32	2.21209	7.24	1.50776	6.85714	1.1455	6.03571	1.77393	5.61538	2.18092
245	吹吹拍拍	Boasting and toadying	negative	3.91667	1.49941	5.16667	1.54828	5.11538	1.65273	6.11538	2.04512	3.25	1.67462	5.58333	1.28255	4.85185	1.68029	7.11111	1.01274	4.58333	0.928611	4.75	1.70038	5.4	1.60728	5.04	2.33595	3.76	1.53514	4.76	1.69017	5	1.52753	6.44	1.60935	4.08696	1.47442	5.6087	1.2699	5.22222	1.78311	5.81481	2.37028	2.84615	1.51911	5.46154	1.33012	4.53846	1.45002
246	炊烟袅袅	Smoke curl up	positive	6.12381	1.18236	4.67619	1.80008	5.18	1.78074	7.34	1.30321	5.82692	1.13278	4.86538	1.65718	4.2	1.55456	7.12	1.0924	6.41509	1.16741	4.49057	1.92776	6.16	1.43411	7.56	1.47422	6.28846	1.25771	4.71154	1.89257	4.95833	1.45898	7.375	1.49819	5.96226	1.09126	4.64151	1.72197	5.38462	2.04112	7.30769	1.12318	5.80769	1.29674	5	1.95959	4.25	1.3568
247	垂手可得	Acquire a thing easily	neutral	5.89815	1.26742	5.74074	1.34213	6.34694	1.89902	7.12245	1.39393	5.74074	1.2004	5.53704	1.43689	5.84	1.40475	6.84	1.10604	6.05556	1.32347	5.94444	1.2196	6.875	2.21286	7.41667	1.6129	5.92727	1.25984	5.72727	1.19342	6.44	1.80462	6.96	1.48549	5.86792	1.28658	5.75472	1.49236	6.25	2.02699	7.29167	1.30148	5.82143	1.15642	5.64286	1.25357	5.84615	1.40512
248	垂死挣扎	Give dying kicks	negative	3.06542	1.37547	6.56075	1.31879	3.87755	1.79853	7.02041	1.23305	2.43636	1.18265	6.67273	1.47892	4.08333	1.99819	6.875	1.2959	3.73077	1.25425	6.44231	1.12744	3.68	1.6	7.16	1.17898	2.86792	1.28658	6.75472	1.34315	3.78261	1.78266	7.08696	1.16436	3.25926	1.44307	6.37037	1.27821	3.96154	1.84349	6.96154	1.3109	2.14286	1.04401	6.89286	1.44886	4	2.19089
249	春华秋实	Glorious flowers in spring and solid fruits in autumn	positive	6.42857	1.19024	5.10204	1.97109	4.65217	1.87637	6.86957	1.27556	6.48	1.35769	5.28	2.0108	3.78261	1.67757	6.82609	0.936734	6.375	1.0135	4.91667	1.95419	5.52174	1.67521	6.91304	1.56417	6.69231	1.31967	4.88462	2.14153	4.69565	1.9641	6.73913	1.5141	6.13043	0.967863	5.34783	1.77377	4.6087	1.82755	7	1	6.92857	1.32806	4.92857	2.40078	3.72727	1.73729
250	春去秋来	Time rolls on	neutral	5.31915	1.32051	4.70213	1.50239	2.96	1.5513	7.64	1.20814	5.43478	1.19947	5.26087	1.32175	3.04	1.79072	7.68	0.988264	5.20833	1.444	4.16667	1.49395	2.88	1.30128	7.6	1.41421	5.26087	0.963771	4.69565	1.32921	3.04167	1.57367	7.5	1.44463	5.375	1.61009	4.70833	1.68056	2.88462	1.55761	7.76923	0.951113	5.36364	1.12006	5.63636	0.924416	2.75	1.81534
251	春色满园	The garden was gay with blossoms of every bue	positive	7.21495	1.09051	5.91589	2.05179	4.36735	2.01757	7.34694	1.14657	7.45283	1.10185	6.49057	1.99637	3.48	1.85113	7.32	1.10755	6.98148	1.03688	5.35185	1.96341	5.29167	1.78104	7.375	1.20911	7.44444	1.14376	5.85185	2.20982	4.33333	2.05715	7.29167	1.26763	6.98113	0.990155	5.98113	1.89626	4.4	2.02073	7.4	1.04083	7.74074	1.12976	6.40741	2.422	3	1.59545
252	春夏秋冬	Spring, summer, autumn and winter	neutral	5.44444	0.966614	4.42222	1.38972	3.42308	2.1543	8	0.949716	5.09524	0.300793	4.95238	0.973457	3.48148	2.17274	7.81481	1.00142	5.75	1.22474	3.95833	1.5458	3.36	2.17715	8.2	0.866025	5.43478	0.895752	4.47826	1.53355	3.76923	2.23263	8.07692	0.844894	5.45455	1.05683	4.36364	1.25529	3.07692	2.05763	7.92308	1.05539	5.09091	0.301511	4.81818	1.32802	4	2.41788
253	唇红齿白	Rosy lips and pretty white teeth	neutral	5.83333	1.37351	5.25	1.45134	4.97959	1.31482	6.65306	1.43688	5.25	1.03209	5.41667	1.01795	4.54167	1.06237	6.33333	1.20386	6.41667	1.44212	5.08333	1.79169	5.4	1.41421	6.96	1.59374	5.88	1.64114	5.24	1.50776	5.04348	1.29609	6.56522	1.56165	5.78261	1.04257	5.26087	1.42118	4.92308	1.3542	6.73077	1.34336	5.23077	1.36344	5.92308	0.759555	4.45455	1.03573
254	唇枪舌剑	Battle of words	neutral	4.08511	1.69179	6.48936	1.26615	5.16327	2.03457	7.30612	1.1031	4.3913	1.82755	6.26087	1.57299	5	2.06419	7.125	0.991814	3.79167	1.53167	6.70833	0.858673	5.32	2.03552	7.48	1.19443	4	1.71825	6.63636	1.17698	5	2.23607	7.16	1.06771	4.16	1.7	6.36	1.35031	5.33333	1.83366	7.45833	1.14129	4.2	2.04396	6.5	1.43372	4.53846	2.53691
255	慈眉善目	A benevolent and kind countenance	positive	7.14894	1.04213	4.3617	1.98281	5.17021	1.76092	7.44681	0.879934	7.16	1.21381	4.6	2.23607	4.73913	1.8394	7.21739	0.902347	7.13636	0.83355	4.09091	1.65929	5.58333	1.6129	7.66667	0.816497	7.21739	1.16605	4.65217	2.2281	5.21739	1.88189	7.52174	0.994053	7.08333	0.928611	4.08333	1.71735	5.125	1.67624	7.375	0.76967	7.23077	1.30089	4.92308	2.4311	4.72727	2.3277
256	此生此世	This life in this world	neutral	5.35644	0.819563	5.09901	1.25304	4.38776	1.97712	7.14286	1.30703	5.12	0.435187	5	0.670059	4.375	1.78916	7.08333	0.829702	5.58824	1.02326	5.19608	1.63731	4.4	2.17945	7.2	1.65831	5.35294	0.844358	5.2549	1.07412	4.58333	2.08341	7.125	1.39292	5.36	0.802038	4.94	1.40567	4.2	1.89297	7.16	1.24766	5.11538	0.325813	5.26923	0.603834	4.16667	2.08167
257	匆匆过客	Passer	neutral	4.54369	0.751165	4.83495	1.10344	4.6875	1.24039	6.89583	1.47662	4.5	0.70014	5	0.816497	4.8	1.38444	6.44	1.52971	4.58824	0.8044	4.66667	1.32162	4.56522	1.07982	7.3913	1.2699	4.73077	0.660225	4.84615	1.2269	4.73913	1.09617	7.30435	1.25896	4.35294	0.795576	4.82353	0.973774	4.64	1.38082	6.52	1.5843	4.77778	0.57735	4.96296	0.854017	4.84615	1.40512
258	从那之后	After that	neutral	4.88889	0.382707	4.13333	1.73991	5.16327	1.41932	7	1.47196	4.95652	0.366589	4.73913	1.00983	5.32	1.37598	6.68	1.14455	4.81818	0.394771	3.5	2.11007	5	1.47442	7.33333	1.711	4.83333	0.481543	3.875	2.00678	5.12	1.45258	7.24	1.33167	4.95238	0.218218	4.42857	1.36277	5.20833	1.41357	6.75	1.59483	5	0.426401	4.5	1.3817	5.46154	1.45002
259	从容自若	Calm with confidence	positive	6.5	1.27802	4.80435	2.11471	6.6	1.39971	7.34	1.08063	6.59091	1.2596	5.31818	1.9612	6.24	1.45144	6.8	0.912871	6.41667	1.31601	4.33333	2.18028	6.96	1.2741	7.88	0.971253	6.54167	1.444	4.70833	2.23566	7	0.932505	7.375	1.05552	6.45455	1.10096	4.90909	2.02153	6.23077	1.65669	7.30769	1.12318	6.58333	1.56428	5.16667	2.2088	6.66667	1.1547
260	从头到底	From top to bottom	neutral	5.37778	0.7772	4.88889	1.46508	5.33333	1.76651	7.10417	1.22456	5.56522	0.992063	5.30435	0.97397	5.41667	1.99819	7.25	0.84699	5.18182	0.394771	4.45455	1.76547	5.25	1.53934	6.95833	1.51741	5.56	0.960902	4.92	1.86905	5.45833	1.97768	7.375	1.09594	5.15	0.366348	4.85	0.74516	5.20833	1.5598	6.83333	1.30773	5.84615	1.21423	5.69231	1.1094	5.75	2.00567
261	从下而上	From the bottom to the top	neutral	5.11628	0.390927	4.53488	1.42007	4.79167	1.70054	7.02083	1.0617	5.1	0.307794	4.9	1.16529	3.91304	1.64905	6.95652	0.975997	5.13043	0.457697	4.21739	1.56544	5.6	1.32288	7.08	1.15181	5.13636	0.467563	4.59091	1.53248	4.82609	1.61392	6.78261	1.0853	5.09524	0.300793	4.47619	1.32737	4.76	1.80924	7.24	1.0116	5.2	0.421637	4.8	1.61933	3.81818	1.32802
262	凑凑合合	Barely adapt or cope with	neutral	4.25581	0.953515	4.88372	1.19939	5.53191	1.62656	7.19149	1.035	4	0.794719	5.5	0.688247	5.43478	1.67403	6.95652	1.02151	4.47826	1.03877	4.34783	1.30065	5.625	1.61009	7.41667	1.01795	4.38095	0.804748	4.71429	1.30931	5.52174	1.72862	7.26087	1.00983	4.13636	1.08213	5.04545	1.0901	5.54167	1.5598	7.125	1.07592	4.2	0.788811	5.5	0.707107	4.81818	1.83402
263	粗茶淡饭	A simple meal	neutral	5.53922	0.950993	4.52941	1.48728	5.40426	2.19346	7.53191	1.03946	5.58824	0.898365	4.96078	1.35589	4.52174	2.12922	7.3913	0.940944	5.4902	1.00742	4.09804	1.50007	6.25	1.9393	7.66667	1.12932	5.48	0.931095	4.4	1.67819	5.69565	2.30483	7.82609	1.15413	5.59615	0.975376	4.65385	1.28161	5.125	2.09165	7.25	0.84699	5.88	0.881287	4.92	1.6563	4.36364	2.15744
264	粗粗壮壮	Coarse and strong	neutral	5.18447	0.915526	4.97087	1.37525	4.83673	1.57251	6.87755	1.49489	5.42	0.810392	5.24	1.17038	4.52	1.63605	6.68	1.4922	4.96226	0.960013	4.71698	1.51121	5.16667	1.46456	7.08333	1.50121	5.03922	0.847603	4.86275	1.41449	5.08	1.41185	6.96	1.6452	5.32692	0.96449	5.07692	1.34085	4.58333	1.71735	6.79167	1.35066	5.375	0.824226	5	1.25109	4.92308	1.70595
265	粗里粗气	The voice is loud	negative	3.5	1.01058	5.29167	1.16616	5.44898	1.55538	6.81633	1.4094	3.58333	0.928611	5.54167	1.14129	5.48	1.55778	6.88	0.927362	3.41667	1.10007	5.04167	1.16018	5.41667	1.58572	6.75	1.79976	3.4	1	5.4	1.1547	5.29167	1.65448	7.375	1.05552	3.6087	1.03305	5.17391	1.19286	5.6	1.47196	6.28	1.51438	3.76923	0.725011	5.53846	1.19829	5.5	1.5667
266	粗声大气	A deep, gruff voice	negative	3.42857	1.08182	5.80952	1.1937	5.51064	1.86352	7	1.25109	3.5283	1.01154	5.69811	1.06672	5.73913	1.9121	6.91304	0.99604	3.32692	1.14996	5.92308	1.31128	5.29167	1.82921	7.08333	1.47196	3.31373	0.92715	5.82353	1.17823	5.34783	1.87347	7	1.3484	3.53704	1.20866	5.7963	1.21903	5.66667	1.88049	7	1.17954	3.36	0.757188	5.72	0.936305	5.36364	1.91169
267	粗通文墨	Barely know the rudiments	neutral	5.75	1.37609	4.97917	1.66937	5.5098	1.48825	6.56863	1.7805	5.79167	1.38247	5.33333	1.55106	5.07692	1.3542	6.38462	1.55118	5.70833	1.39811	4.625	1.73988	5.96	1.51327	6.76	2.00582	5.86957	1.45553	4.86957	1.74002	5.53846	1.30325	6.5	1.86011	5.64	1.31909	5.08	1.63095	5.48	1.68622	6.64	1.72916	6.18182	1.25045	5	1.89737	5	1.1767
268	粗中有细	Be somewhat refined in one's rough way	positive	6.27083	1.00508	4.97917	1.68207	5.86275	1.5877	7.31373	1.17457	6.36	0.994987	5.32	1.43527	5.66667	1.79743	7.2963	1.17063	6.17391	1.02922	4.6087	1.87663	6.08333	1.31601	7.33333	1.20386	6.16	1.06771	4.76	1.96384	5.80769	1.35703	7.15385	1.34736	6.3913	0.940944	5.21739	1.31275	5.92	1.82392	7.48	0.962635	6.07692	1.11516	5.46154	1.71345	5.57143	1.6968
269	存心不良	Evil thoughts	negative	2.84783	1.03209	6.02174	1.66652	4.84	1.84457	6.88	1.43769	2.69565	1.10514	5.95652	1.8703	4.72	1.92614	6.72	1.36991	3	0.953463	6.08696	1.47442	4.96	1.79072	7.04	1.51327	2.6087	1.07615	6.26087	1.60163	4.41667	1.69184	6.75	1.79976	3.08696	0.949308	5.78261	1.73091	5.23077	1.92474	7	1.0198	2.5	1.31426	6	2.08893	4.25	2.22077
270	寸步难移	Can hardly move a step	negative	3.12766	1.20897	5.65957	1.90282	3.53061	1.89409	7.02041	1.26639	3.04348	1.29609	5.86957	1.6041	3.54167	1.74404	6.79167	1.10253	3.20833	1.14129	5.45833	2.16653	3.52	2.06398	7.24	1.39284	3	1.06322	5.58333	1.86307	3.54167	1.95558	7.04167	1.12208	3.26087	1.35571	5.73913	1.98213	3.52	1.8735	7	1.41421	2.91667	1.1645	5.91667	1.50504	3.5	1.78377
271	寸有所长	Every man has his merits	neutral	5.7551	1.07103	5.18367	1.78738	5.15385	1.50013	6.67308	1.74582	5.68	0.852447	5.4	1.35401	4.7037	1.51441	6.48148	1.76222	5.83333	1.27404	4.95833	2.15647	5.64	1.35031	6.88	1.73973	5.92308	1.12865	4.76923	1.98611	5.03846	1.28002	6.11538	2.21498	5.56522	0.992063	5.65217	1.43364	5.26923	1.71015	7.23077	0.815239	5.92857	0.828742	5.42857	1.65084	4.85714	1.56191
272	错错落落	Strewn at random	neutral	4.55319	0.92803	5.08511	1.05973	5.04167	1.18426	6.41667	1.25195	4.73913	0.915393	5.04348	0.928256	4.83333	1.20386	6.375	1.0135	4.375	0.923721	5.125	1.191	5.25	1.15156	6.45833	1.47381	4.64	0.95219	4.96	1.0198	4.95652	1.3307	6.82609	1.07247	4.45455	0.911685	5.22727	1.10978	5.12	1.05357	6.04	1.30639	4.84615	0.987096	5	1.1547	4.75	1.65831
273	答非所问	Give an irrelevant answer	negative	3.41584	0.851673	5.64356	1.08244	4.95918	1.74355	7.02041	1.1635	3.70833	0.770696	5.4375	0.896951	5.08333	1.6129	6.875	1.191	3.15094	0.841158	5.83019	1.20473	4.84	1.88591	7.16	1.1431	3.45098	0.901415	5.72549	1.11496	4.95833	1.70623	6.83333	1.20386	3.38	0.805339	5.56	1.05289	4.96	1.81384	7.2	1.11803	3.75	0.793999	5.45833	0.779028	5.16667	1.74946
274	打擦边球	Play edge ball	neutral	4.86667	1.05744	5.55556	0.989847	4.85714	1.45774	7.04082	1.25763	4.85714	0.910259	5.33333	0.483046	5.04167	1.48848	6.5	1.17954	4.875	1.191	5.75	1.25974	4.68	1.43527	7.56	1.12101	4.875	0.850192	5.54167	0.58823	4.875	1.39292	6.875	1.32902	4.85714	1.27615	5.57143	1.32557	4.84	1.54596	7.2	1.19024	4.75	0.621582	5.5	0.522233	4.91667	1.72986
275	打马虎眼	In order to gloss it over	negative	3.28261	0.934833	5.52174	1.42578	5.61702	1.5116	7.23404	0.937452	3.13043	1.05763	5.52174	1.64785	5.43478	1.40861	6.82609	0.650327	3.43478	0.787752	5.52174	1.20112	5.79167	1.61458	7.625	1.0135	3.09091	0.811177	5.68182	1.3934	5.63636	1.52894	7.31818	1.08612	3.45833	1.02062	5.375	1.46888	5.6	1.52753	7.16	0.8	2.72727	0.786245	5.45455	1.91644	5.45455	1.36848
276	打小报告	Inform secretly on a colleague [sb.]	negative	2.57778	1.17722	6.46667	1.28982	4.89583	1.97042	7.20833	1.12908	2.63636	1.17698	6.04545	1.46311	5.33333	1.76109	6.95833	0.999094	2.52174	1.20112	6.86957	0.967863	4.45833	2.10546	7.45833	1.21509	2.52174	1.344	6.56522	1.23679	5.47826	1.78044	7.3913	1.11759	2.63636	1.00216	6.36364	1.36436	4.36	2.01825	7.04	1.13578	2.58333	1.50504	6.25	1.3568	6	1.48324
277	打心底里	In the bottom of my heart	neutral	5.48039	0.982323	4.9902	1.4792	5.78431	1.51412	7.27451	1.16753	5.19608	0.490698	5.11765	0.972565	5.5	0.989949	6.73077	1.04145	5.76471	1.24239	4.86275	1.85494	6.08	1.89121	7.84	1.02794	5.38	0.779586	4.84	1.43371	5.32	1.40594	7	1.29099	5.57692	1.14354	5.13462	1.52147	6.23077	1.50486	7.53846	0.989172	5.19231	0.401918	5.34615	0.689481	5.15385	1.06819
278	打预防针	Preventive inoculation	neutral	4.86869	1.01666	5.48485	1.01382	4.83673	1.98271	7.20408	1.18988	5.2449	0.75085	5.32653	0.746876	4.91667	1.90917	6.83333	1.00722	4.5	1.11117	5.64	1.20814	4.76	2.08726	7.56	1.26095	4.84	0.976458	5.34	1.00224	5.3913	2.27115	7.56522	1.19947	4.89796	1.06546	5.63265	1.01435	4.34615	1.57334	6.88462	1.10732	5.24	0.597216	5.24	0.723418	5.09091	2.34327
279	大胆泼辣	Bold and pungent	neutral	5.58491	1.45973	6.12264	1.37808	5.46	1.7404	7.3	1.07381	6.11538	1.00301	6.15385	1.30436	5.52	1.78232	7.08	1.15181	5.07407	1.64663	6.09259	1.45717	5.4	1.73205	7.52	0.962635	5.51852	1.3562	6.01852	1.32453	5.5	1.86501	7.29167	1.19707	5.65385	1.57037	6.23077	1.43644	5.42308	1.65343	7.30769	0.970329	5.96296	1.09128	6.18519	1.30198	5.58333	2.02073
280	大地回春	Earth rejuvenation	positive	7.14894	1.06278	5.55319	2.12448	3.32	1.95292	7.68	0.935469	7.16	1.21381	6.08	2.46509	2.56	1.70978	7.72	0.936305	7.13636	0.888844	4.95455	1.4953	4.08	1.91311	7.64	0.95219	7.33333	1.12932	5.5	2.18692	3.08333	1.79169	7.70833	0.858673	6.95652	0.975997	5.6087	2.10495	3.53846	2.10201	7.65385	1.01754	7.07692	1.38212	5.84615	2.73393	2.5	1.88294
281	大汗淋漓	Sweaty and sweating	neutral	4.23913	1.41711	5.6087	1.32461	5.57447	1.83853	7.53191	0.974703	4.21739	1.0853	5.43478	0.945135	5.5	1.69398	7.25	1.03209	4.26087	1.71139	5.78261	1.62247	5.65217	2.01379	7.82609	0.834058	3.56	1.26095	5.68	1.40594	5.125	1.96297	7.54167	1.06237	5.04762	1.16087	5.52381	1.24976	6.04348	1.60902	7.52174	0.897956	4.07692	1.18754	5.53846	1.1266	5.08333	1.83196
282	大旱之年	Year of drought	negative	2.85577	1.11841	6.27885	1.42418	2.69388	1.57062	6.83673	1.62464	2.90385	1.2408	5.96154	1.66817	3	1.83303	7.03846	1.24838	2.80769	0.990909	6.59615	1.05272	2.34783	1.15242	6.6087	1.97114	2.82	1.18992	6.48	1.11098	2.4	1.32288	7.44	1.15758	2.88889	1.05806	6.09259	1.6514	3	1.7693	6.20833	1.81729	2.875	1.32902	6.33333	1.12932	2.30769	1.4367
283	大见成效	Great results	positive	6.84444	1.26051	6.2	1.71358	6.02083	1.70718	6.875	1.782	7	1.14018	6.90476	1.09109	5.625	1.86063	7.25	0.896854	6.70833	1.36666	5.58333	1.93181	6.41667	1.47196	6.5	2.32192	7.25	1.25974	6.54167	1.69344	6.04167	1.92194	7.375	0.875388	6.38095	1.11697	5.80952	1.69172	6	1.50362	6.375	2.28059	7.16667	1.4668	6.91667	1.37895	5.46154	2.14536
284	大老爷们	Mature man	neutral	5.18182	0.837436	5.31313	1.04634	4.73077	1.63438	7.38462	1.15731	5.04082	0.675746	5.12245	0.807069	4.37037	1.62073	7.07407	1.035	5.32	0.957036	5.5	1.21638	5.12	1.58955	7.72	1.2083	5.06122	0.774816	5.14286	1.08012	4.96154	1.48272	7.23077	1.24283	5.3	0.886405	5.48	0.99468	4.5	1.772	7.53846	1.06699	5	0.722315	5.125	0.850192	4.57143	1.2225
285	大庆精神	The spirit of the daqing oilfield	positive	6.39583	1.18033	5.5625	2.13289	4.58	1.97008	6.42	2.33946	6.625	1.20911	5.75	1.98363	4.16	2.17332	7.6	1.25831	6.16667	1.12932	5.375	2.29957	5	1.68325	5.24	2.5865	6.125	1.03472	5.79167	2.10546	4.6	1.77951	6.32	2.21209	6.66667	1.27404	5.33333	2.18028	4.56	2.18098	6.52	2.502	6.41667	0.996205	6.33333	1.66969	4.15385	2.19265
286	大显神通	Give full play to one's remarkable skill	positive	6.65094	1.02393	6.27358	1.45755	5.32653	2.10543	7.26531	1.31934	6.89091	1.13321	6.63636	1.51979	4.6	1.95789	6.92	1.38203	6.39216	0.826521	5.88235	1.29069	6.08333	2.01983	7.625	1.1726	6.69811	1.13654	6.45283	1.18591	5.125	2.23242	7.20833	1.71893	6.60377	0.905955	6.09434	1.67865	5.52	2.0025	7.32	0.802081	6.96429	1.26146	6.92857	1.18411	4.58333	2.10878
287	大限已到	The limit has arrived(day of one's doom)	negative	3.12381	1.56091	6.35238	1.57493	2.3913	1.52721	6.97826	1.30791	3.57692	1.70749	6.13462	1.28382	2.70833	1.78104	6.5	1.35133	2.67925	1.26755	6.56604	1.80288	2.04545	1.13294	7.5	1.05785	3	1.67106	6.38889	1.90745	2.09091	1.37699	7.13636	1.55212	3.2549	1.44004	6.31373	1.14	2.66667	1.63299	6.83333	1.0495	3.51852	1.88864	6.2963	1.5396	2.18182	1.53741
288	大相国寺	The daxiangguo temple	neutral	5.26087	0.647552	4.19565	1.83327	3.85417	1.54355	5.875	2.26561	5.26087	0.619192	4.65217	1.49571	3.82609	1.69631	5.95652	1.63702	5.26087	0.6887	3.73913	2.04978	3.88	1.42361	5.8	2.75379	5.08696	0.514609	3.82609	1.99208	3.86957	1.6041	5.86957	2.45513	5.43478	0.727767	4.56522	1.61881	3.84	1.51877	5.88	2.1276	5.16667	0.389249	4.58333	1.72986	3.54545	1.86353
289	大型客车	Large bus	neutral	5.11111	0.531816	4.37778	1.4968	4.53061	1.78071	7.55102	1.33948	5.09091	0.294245	5	0.308607	3.96	1.6452	7.2	1.58114	5.13043	0.694416	3.78261	1.90589	5.125	1.75233	7.91667	0.928611	5.08333	0.653863	4.16667	1.78561	4.56	1.58325	7.56	1.29357	5.14286	0.358569	4.61905	1.07127	4.5	2	7.54167	1.41357	5.16667	0.389249	5	0.426401	4	1.77951
290	大专学校	Junior college; apprenticeship	neutral	4.83333	0.666241	4.47475	1.37279	4.40816	1.82481	6.89796	1.5034	5.08333	0.347228	4.91667	0.738985	3.875	1.56906	7.125	1.2619	4.59804	0.800123	4.05882	1.67823	4.92	1.93477	6.68	1.70098	5.01	0.257341	4.34	1.39401	4.52	2.18174	6.96	1.30639	4.65306	0.879181	4.61224	1.35118	4.29167	1.39811	6.83333	1.711	5.08	0.276887	4.84	0.85049	3.30769	1.84321
291	呆若木鸡	Dumb as a wooden chicken	negative	3.41667	1.14545	4.95833	1.68798	4.85417	1.83337	6.89583	1.27562	3.375	1.0135	5	1.61515	4.34783	1.5553	6.6087	1.23359	3.45833	1.28466	4.91667	1.79169	5.32	1.97315	7.16	1.28062	3.54167	1.10253	4.91667	1.88626	4.65217	2.0804	7.13043	1.14035	3.29167	1.19707	5	1.50362	5.04	1.59374	6.68	1.37598	3.66667	1.23091	4.66667	1.77525	3.81818	2.0405
292	代购代销	Buy and sell	neutral	5.02174	0.999758	4.5	1.36219	5.12	1.75708	6.72	1.53915	5.21739	0.599736	4.78261	0.951388	4.68	1.6	6.56	1.22746	4.82609	1.26678	4.21739	1.65025	5.56	1.82757	6.88	1.81016	5.27273	1.16217	4.27273	1.42032	5.16667	1.60615	6.70833	1.48848	4.79167	0.779028	4.70833	1.30148	5.07692	1.91673	6.73077	1.61388	5.45455	0.687552	4.54545	1.21356	4.41667	1.37895
293	代人受过	Scapegoat; suffer for the faults of another	negative	3.68519	1.5627	6.25	1.27613	4.65306	2.01609	6.95918	1.42827	3.81481	1.68315	6.09259	1.15364	5.2	1.70783	6.6	1.41421	3.55556	1.43628	6.40741	1.38071	4.08333	2.18526	7.33333	1.37261	3.53704	1.48848	6.42593	1.09203	4.84	1.99332	6.76	1.64012	3.83333	1.63396	6.07407	1.42553	4.45833	2.06375	7.16667	1.16718	3.7037	1.70553	6.33333	1	5.07692	2.01914
294	待人处事	The way one gets along with people and treat things	neutral	5.45	0.814925	4.15	1.56156	6.17778	1.91037	7.64444	1.00353	5.42857	0.676123	4.61905	1.02353	5.8	1.84842	7.36	0.95219	5.47368	0.964274	3.63158	1.89181	6.65	1.92696	8	0.973329	5.4	0.910259	3.73333	1.38701	6.47826	1.67521	7.69565	1.06322	5.48	0.770281	4.4	1.63299	5.86364	2.12234	7.59091	0.959121	5.11111	0.333333	4.55556	0.881917	6.16667	1.89896
295	单打独斗	Go it alone	neutral	4.71739	1.39305	5.97826	1.10532	5.26087	1.7693	7.06522	1.20004	4.52174	0.947224	5.56522	0.727767	5	1.90238	6.72727	1.12045	4.91304	1.72977	6.3913	1.2699	5.5	1.64184	7.375	1.20911	4.5	0.834058	5.66667	0.816497	4.65217	1.69515	6.91304	1.41142	4.95455	1.81206	6.31818	1.2868	5.86957	1.6598	7.21739	0.951388	4.53846	1.05003	5.61538	0.869718	4.36364	1.74773
296	单口相声	Monologue comic talk	neutral	5.54348	1.12953	5.36957	1.37208	5.5	1.70945	7.1087	1.13975	5.72727	1.07711	5.59091	1.14056	5	1.67874	6.86957	1.14035	5.375	1.1726	5.16667	1.55106	6	1.62369	7.34783	1.11227	5.42857	1.16496	5.38095	1.2836	5.63636	1.64882	7.27273	1.3159	5.64	1.11355	5.36	1.46856	5.375	1.78916	6.95833	0.954585	5.77778	1.09291	5.66667	1.11803	5.27273	1.67874
297	单门独户	Single door	neutral	4.92553	1.45206	4.74468	1.48131	4.7551	1.71429	6.67347	1.51915	5.375	1.55515	4.91667	1.44212	3.95833	1.51741	6.70833	1.26763	4.45652	1.19576	4.56522	1.53226	5.52	1.55778	6.64	1.75309	5.0625	1.61725	4.66667	1.63299	4.83333	1.60615	6.83333	1.46456	4.78261	1.27766	4.82609	1.33662	4.68	1.8421	6.52	1.5843	5.38462	1.75777	4.92308	1.89128	4.08333	1.50504
298	单人沙发	Armchair	neutral	5.04545	0.370703	4.25	1.4647	5.32653	1.92989	7.26531	1.22092	4.95652	0.208514	5	0	4.92	1.6563	7.2	1.11803	5.14286	0.478091	3.42857	1.80476	5.75	2.13154	7.33333	1.34056	5.09524	0.538958	4.66667	1.23828	5.28	2.31876	7.48	1.22882	5	0	3.86957	1.5755	5.375	1.46888	7.04167	1.19707	4.91667	0.288675	5	0	4.46154	1.8081
299	单线铁路	Single line railway	neutral	4.97619	0.412494	4.92857	0.921104	3.875	1.87509	6.6875	1.35515	5	0.458831	5.15	0.366348	3.5	2	6.83333	1.12932	4.95455	0.37509	4.72727	1.20245	4.25	1.70038	6.54167	1.5598	5	0.417029	4.875	1.1156	3.96	2.00998	6.6	1.65831	4.94444	0.416176	5	0.594089	3.78261	1.75697	6.78261	0.951388	5	0.603023	5.25	0.452267	3.69231	2.25036
300	胆识过人	Exceed the rest in bravery and wisdom	positive	6.85714	1.11803	6.12245	1.69106	5.03774	1.94108	7.28302	1.24618	6.96	1.17189	6.12	1.66633	4.07143	1.60851	7.07143	1.33135	6.75	1.07339	6.125	1.75233	6.12	1.71561	7.52	1.1225	6.68	1.28193	6.4	1.5	5.11538	1.70474	7	1.49666	7.04167	0.907896	5.83333	1.85722	4.96296	2.17471	7.55556	0.891556	6.76923	1.48064	6.61538	1.3253	4.07143	1.38477
301	淡然处之	Treat with indifference	neutral	5.93204	1.12252	4.41748	1.65402	6.55102	1.51467	7.20408	1.25797	5.61224	0.885445	4.91837	1.15175	6.08333	1.6129	7	0.978019	6.22222	1.23879	3.96296	1.90296	7	1.29099	7.4	1.47196	5.96226	1.12596	4.4717	1.6125	6.69565	1.55021	7.3913	1.19617	5.9	1.12938	4.36	1.71143	6.42308	1.50128	7.03846	1.3109	5.61538	1.02282	4.88462	1.33647	6.18182	1.83402
302	淡妆浓抹	Light and heavy make-up	neutral	4.2766	1.6379	5.55319	1.13843	6.10204	1.48948	7	1.48605	4.25	1.48177	5.45833	1.10253	5.96	1.51327	6.76	1.33167	4.30435	1.81996	5.65217	1.19121	6.25	1.48177	7.25	1.62186	4.29167	1.70623	5.70833	0.907896	6.28	1.67133	7.24	1.42244	4.26087	1.60163	5.3913	1.33958	5.91667	1.28255	6.75	1.53934	4.23077	1.48064	5.84615	1.06819	6.23077	1.58923
303	弹尽援绝	Run out of ammunition with no reinforcements in sight	negative	2.91111	1.36219	6.51111	1.75321	3.34694	1.99532	6.20408	1.96829	2.86364	1.61232	6.18182	2.1075	3.625	2.374	6.16667	2.16025	2.95652	1.10693	6.82609	1.30217	3.08	1.55242	6.24	1.80924	2.71429	1.45406	6.90476	1.67047	3.6	2.08167	6	2.23607	3.08333	1.28255	6.16667	1.78561	3.08333	1.90917	6.41667	1.66594	2.55556	1.66667	7	1.73205	4	2.61406
304	弹无虚发	Hit the target every time without a miss	positive	6.63889	1.39732	6.27778	1.8283	5.8125	1.81783	7.08333	1.19988	6.72222	1.4461	6.25926	1.93464	5.36	1.72916	7.08	1.03763	6.55556	1.35517	6.2963	1.73346	6.30435	1.81996	7.08696	1.37883	6.72222	1.47196	6.74074	1.46899	6.04167	1.51741	7.08333	1.21285	6.55556	1.32703	5.81481	2.03807	5.58333	2.08341	7.08333	1.21285	6.59259	1.71552	6.92593	1.43918	5.46154	1.6641
305	弹指之间	In a short moment	neutral	5.16505	0.728914	4.94175	1.29725	4.46939	1.92681	6.97959	1.46472	5.35294	0.687707	5.15686	0.833608	4.56	2.02237	6.64	1.55134	4.98077	0.727348	4.73077	1.61021	4.375	1.86063	7.33333	1.30773	5.16	0.509502	4.96	1.10583	4.375	1.58286	6.41667	1.66594	5.16981	0.893047	4.92453	1.46562	4.56	2.23756	7.52	1.00499	5.28	0.541603	5.32	0.627163	4.61538	1.89466
306	当断不断	Be indecisive when decision is needed	negative	3.29787	1.21431	5.95745	1.54579	4.21277	1.88744	7.12766	1.11545	3.04348	1.10693	5.52174	1.62003	5.08696	1.99802	6.82609	1.02922	3.54167	1.28466	6.375	1.37722	3.375	1.34528	7.41667	1.1389	3.04348	1.18622	6.30435	1.55021	4.3913	1.9007	6.95652	1.10693	3.54167	1.21509	5.625	1.49819	4.04167	1.89918	7.29167	1.12208	2.81818	1.25045	5.90909	1.7581	5	2.04939
307	当耳边风	Take like a passing wind	negative	3.37864	1.0301	5.8932	0.979322	5.77551	1.61071	7.28571	1.04083	3.63462	1.10309	5.69231	0.78061	5.68	1.4922	7.08	1.03763	3.11765	0.8865	6.09804	1.11812	5.875	1.75233	7.5	1.02151	3.39623	1.06228	5.86792	0.832922	5.79167	1.71893	7.33333	1.23945	3.36	1.00529	5.92	1.12195	5.76	1.53514	7.24	0.830662	3.71429	1.08379	5.64286	0.780042	5.5	1.88294
308	当牛做马	Willing to wait for others, to listen to others, to be enslaved.	negative	3.36458	1.57013	5.79167	1.68798	4.13725	1.93927	7.21569	1.00625	2.8	1.58114	5.88	1.87794	4.07692	1.74179	7.03846	0.958364	3.97826	1.33551	5.69565	1.49042	4.2	2.16025	7.4	1.04083	3.14	1.68028	5.6	1.82574	3.96	1.88149	7.24	1.12842	3.6087	1.43777	6	1.53741	4.30769	2.01533	7.19231	0.895287	2.42857	1.39859	5.71429	2.05421	4.15385	1.72463
309	当冤大头	When a person deceived on account of his generosity	negative	2.65957	1.40305	6.06383	2.06844	3.77083	1.54699	6.85417	1.20265	2.56522	1.27301	5.47826	2.53825	4.26087	1.71139	6.6087	0.838783	2.75	1.53934	6.625	1.31256	3.32	1.249	7.08	1.44106	2.43478	0.992063	6.13043	1.98413	3.82609	1.58551	6.82609	1.43502	2.875	1.70198	6	2.18692	3.72	1.54164	6.88	0.971253	2.45455	1.12815	5.54545	2.50454	4.27273	2.10195
310	刀山火海	Most dangerous places	negative	4	1.52256	6.31111	1.60712	3.29412	1.64066	6.96078	1.24837	4.2381	1.48003	5.66667	1.42595	3.53846	1.90223	6.84615	1.15559	3.79167	1.5598	6.875	1.56906	3.04	1.30639	7.08	1.35154	3.85714	1.62129	6.14286	1.65184	3.42308	1.74753	6.80769	1.26552	4.125	1.454	6.45833	1.58743	3.16	1.54596	7.12	1.23558	4.22222	1.64148	5.77778	1.48137	3.92857	2.1649
311	倒背如流	Know sth. thoroughly by heart	positive	6.59813	1.08035	5.88785	1.42304	6.34	1.73335	7.42	0.882714	6.57407	1.09203	5.85185	1.559	6.2	1.70783	7.24	0.879394	6.62264	1.07822	5.92453	1.28376	6.48	1.78232	7.6	0.866025	6.52727	1.11976	6.03636	1.26145	6.41667	1.99819	7.54167	0.883627	6.67308	1.04264	5.73077	1.57325	6.26923	1.48479	7.30769	0.884047	6.42857	1.19965	6.28571	1.35693	6.25	2.0505
312	倒买倒卖	Illegal dealing	negative	3.1875	1.23178	5.83333	1.22619	5.30612	1.82807	6.7551	1.4653	2.92	1.15181	5.76	1.39284	5.375	1.95187	6.625	1.27901	3.47826	1.27456	5.91304	1.04067	5.24	1.73877	6.88	1.64114	3.19231	1.20064	5.69231	1.12318	5.43478	1.99604	6.65217	1.69515	3.18182	1.29601	6	1.34519	5.19231	1.69751	6.84615	1.25514	3	1.1094	5.5	1.3445	5.45455	2.42337
313	倒数计时	Countdown	neutral	4.97778	0.811533	5.93333	1.52852	4.65306	2.41998	7.36735	1.37982	5.18182	0.664499	5.45455	1.1434	4.64	2.43036	7.16	1.21381	4.78261	0.902347	6.3913	1.72519	4.66667	2.46129	7.58333	1.5299	4.95	0.604805	5.95	1.70062	4.375	2.65088	7.375	1.31256	5	0.957427	5.92	1.41185	4.92	2.19697	7.36	1.46856	5.11111	0.333333	5.55556	1.13039	3.66667	2.53461
314	道德法庭	Moral tribunal	neutral	5.35556	0.98062	5.37778	1.23009	3.36	2.05794	6.86	1.67831	5.65217	1.0273	5.43478	1.16096	3.6	2.17945	6.76	1.66533	5.04545	0.843873	5.31818	1.32328	3.12	1.94336	6.96	1.7195	5.56522	0.945135	5.26087	1.13688	3.44	2.2561	6.76	1.87705	5.13636	0.990212	5.5	1.33631	3.28	1.88237	6.96	1.48549	5.76923	1.16575	5.38462	1.38675	3.23077	2.35067
315	道法自然	Learn from nature	neutral	5.53191	0.905324	4.44681	1.5716	4.19149	1.84907	5.97872	1.97252	5.47826	0.947224	4.78261	1.56544	4.08333	1.44212	5.5	1.71945	5.58333	0.880547	4.125	1.5411	4.30435	2.22455	6.47826	2.12922	5.33333	0.761387	4.33333	1.46456	3.79167	1.50302	5.66667	2.25864	5.73913	1.00983	4.56522	1.70096	4.6087	2.10495	6.30435	1.60779	5.16667	0.389249	4.33333	1.49747	4.16667	1.40346
316	道听途说	There is no basis for rumour	negative	3.63043	1.18056	5.34783	1.56656	4.77083	1.65336	7.16667	1.13613	3.34783	1.33514	4.73913	1.88818	4.66667	1.52277	6.95833	1.0417	3.91304	0.949308	5.95652	0.824525	4.875	1.80127	7.375	1.20911	3.54545	1.10096	5.13636	1.64159	4.77273	1.65994	7.13636	1.16682	3.70833	1.26763	5.54167	1.50302	4.76923	1.68066	7.19231	1.13205	3.18182	1.25045	4.36364	2.01359	4.63636	1.80404
317	灯红酒绿	Scene of debauchery	neutral	4.46939	1.63429	5.73469	1.23787	4.79167	1.63679	6.9375	1.42031	4.4	1.44338	5.4	1.25831	4.95833	1.51741	6.41667	1.58572	4.54167	1.84106	6.08333	1.1389	4.625	1.76469	7.45833	1.02062	4.5	1.63095	5.61538	1.23538	4.91667	1.38051	6.70833	1.78104	4.43478	1.67403	5.86957	1.25424	4.66667	1.88049	7.16667	0.916831	4.5	1.3445	5.21429	1.3688	4.58333	1.31137
318	登峰造极	Reach the peak of perfection	positive	6.48515	1.79785	6.63366	1.48137	5.22449	2.36525	7.12245	1.50876	5.74	2.06832	6.44	1.41652	4.72	2.20832	6.68	1.74929	7.21569	1.08284	6.82353	1.5324	5.75	2.45392	7.58333	1.05981	6.46154	2.03365	6.75	1.57025	4.76	2.69691	7.04	1.88149	6.5102	1.52919	6.5102	1.38628	5.70833	1.89918	7.20833	1.02062	5.5	2.28473	6.61538	1.38786	4.61538	2.69377
319	低眉顺眼	Obedient	negative	3.95146	1.12353	5.14563	1.23199	5.34694	1.77425	6.87755	1.31708	4.23529	1.15911	5.03922	1.09473	5.64	1.35031	6.76	1.2	3.67308	1.02366	5.25	1.35582	5.04167	2.11576	7	1.44463	4.04	1.049	5.1	1.19949	5.44	1.70978	6.96	1.3687	3.86792	1.19354	5.18868	1.27183	5.25	1.87083	6.79167	1.28466	4.32	1.249	4.96	1.24097	5.53846	1.45002
320	滴滴答答	Tick	neutral	4.9901	0.746402	4.70792	1.14119	4.84783	1.0534	6.93478	1.28931	4.9798	0.654339	4.91919	0.791237	4.82609	1.07247	6.3913	1.23359	5	0.828417	4.50485	1.37109	4.86957	1.05763	7.47826	1.12288	5.0495	0.753342	4.60396	1.22539	4.72727	1.07711	7.31818	1.24924	4.93069	0.738342	4.81188	1.04607	4.95833	1.0417	6.58333	1.24819	5.1	0.646813	4.92	0.965528	4.83333	1.33712
321	滴水穿石	Drip through the stone	positive	6.39583	1.16216	5.22917	1.91566	4.36	1.99755	7.24	1.13497	6.6	1.29099	5.76	1.89912	3.65385	1.6957	7	1.0198	6.17391	0.984063	4.65217	1.79921	5.125	2.04966	7.5	1.21584	6.375	1.34528	5.29167	2.11576	4.125	1.51263	7	1.35133	6.41667	0.974308	5.16667	1.73623	4.57692	2.36936	7.46154	0.859338	6.46154	1.5064	5.92308	2.01914	3.38462	1.55662
322	地老天荒	The end of life	neutral	5.83019	1.71532	5.66038	1.52993	3.55102	1.86035	6.95918	1.63247	4.88462	1.50364	5.44231	1.19498	3.4	2	6.44	1.98074	6.74074	1.38979	5.87037	1.78089	3.70833	1.73153	7.5	0.932505	5.83636	1.58422	5.36364	1.44483	3.52	1.91746	6.6	2.06155	5.82353	1.86232	5.98039	1.56831	3.58333	1.83958	7.33333	0.916831	5.07143	1.43833	5.28571	1.38396	3.23077	1.96443
323	第六感官	Sixth senses	neutral	5.09524	0.484367	4.52381	1.48551	4.85714	1.95789	6.61224	1.72984	5.09524	0.624881	5.09524	0.830949	4.08333	1.69184	6	1.44463	5.09524	0.300793	3.95238	1.77415	5.6	1.93649	7.2	1.80278	5.09524	0.300793	4.61905	1.62715	4.70833	1.82921	6.25	2.04833	5.09524	0.624881	4.42857	1.36277	5	2.10159	6.96	1.30639	5	0	5.3	0.674949	4.16667	1.99241
324	点石成金	Be able to perform wonders	positive	6.81905	1.2072	6.65714	1.35752	4.38	2.13704	6.84	1.26749	6.65385	1.23486	6.48077	1.37898	3.6	1.80278	6.8	1.08012	6.98113	1.16834	6.83019	1.3263	5.16	2.19241	6.88	1.45258	6.92593	1.35774	6.81481	1.1828	4.28	2.20832	7.04	1.05987	6.70588	1.02556	6.4902	1.51489	4.48	2.10396	6.64	1.43991	6.7037	1.51441	6.77778	1.18754	3.46154	2.02548
325	点铁成金	Turn a piece of poor writing into a literary gem	positive	6.69565	1.33116	6.45652	1.76013	4.87234	1.78906	6.59574	1.46939	6.59091	1.22121	6.40909	1.59341	4.08696	1.31125	6.43478	1.03687	6.79167	1.444	6.5	1.93368	5.625	1.88386	6.75	1.79976	6.70833	1.36666	6.41667	1.86307	5.21739	1.83294	6.86957	1.32474	6.68182	1.32328	6.5	1.68325	4.54167	1.71893	6.33333	1.57885	6.41667	1.31137	6.5	1.31426	4.72727	1.27208
326	点头之交	Nodding acquaintance	neutral	4.97826	0.881643	4.84783	1.31601	5.89583	1.43274	7.16667	1.11724	4.90909	0.683763	5.18182	0.394771	5.54167	1.41357	6.625	1.09594	5.04167	1.0417	4.54167	1.74404	6.25	1.39096	7.70833	0.858673	4.875	0.850192	4.83333	1.40393	6	1.32288	7.36	1.25433	5.09091	0.921132	4.86364	1.24577	5.78261	1.56544	6.95652	0.928256	5	0.603023	5.33333	0.492366	6	1.41421
327	电报挂号	Telegraph registration	neutral	4.95455	0.301511	4.47727	1.67733	4.76471	1.79542	6.21569	1.87951	5	0	5	1.09545	3.92308	1.57285	6.69231	1.31967	4.91304	0.417029	4	1.97714	5.64	1.60416	5.72	2.24574	4.90476	0.300793	4.04762	2.10894	4.64	2.01825	6.8	1.55456	5	0.301511	4.86957	1.05763	4.88462	1.58308	5.65385	2.01876	5	0	5	1.5	3.53846	1.56074
328	电光闪闪	Light flash	neutral	5.20408	1.25797	5.5102	1.54276	3.93617	1.67338	6.40426	1.55563	5	1.22474	5.4	1.35401	3.16667	1.63299	6.20833	1.17877	5.41667	1.28255	5.625	1.73988	4.73913	1.32175	6.6087	1.87663	4.92	1.22202	5.8	1.55456	3.68182	1.615	6.81818	1.25874	5.5	1.25109	5.20833	1.50302	4.16	1.72434	6.04	1.7195	4.84615	1.40512	6.15385	0.987096	2.81818	1.72152
329	电教中心	Audio-visual center	neutral	5.07143	0.260661	4.61905	1.30575	4.3617	1.69943	6.48936	1.82819	5	0	5.1	0.447214	3.73913	1.54383	6.56522	1.19947	5.13636	0.35125	4.18182	1.65145	4.95833	1.65448	6.41667	2.30154	5.08696	0.288104	4.78261	1.31275	4.34783	1.69515	6.43478	1.94997	5.05263	0.229416	4.42105	1.30451	4.375	1.73988	6.54167	1.74404	5	0	5.18182	0.603023	3.36364	1.62928
330	电视教学	Tv teaching	neutral	5.43478	0.688062	4.63043	1.4508	4.61224	1.83503	7.22449	1.17731	5.54167	0.658005	5.20833	1.02062	4.08333	1.66594	7.04167	1.12208	5.31818	0.716231	4	1.60357	5.12	1.87794	7.4	1.22474	5.34783	0.71406	4.91304	1.59297	4.58333	1.66594	6.91667	1.31601	5.52174	0.665348	4.34783	1.26522	4.64	2.01825	7.52	0.962635	5.53846	0.77625	5.46154	1.1266	4.16667	2.03753
331	电视明星	Tv star	neutral	5.73585	1.11528	5.22642	1.68061	4.48889	1.25449	7.06667	1.42063	5.64151	0.879124	5.16981	1.26697	4.40909	1.14056	6.45455	1.37069	5.83019	1.31172	5.28302	2.02273	4.56522	1.37597	7.65217	1.22877	5.86792	1.17731	5.33962	1.79683	4.85714	1.23635	7.04762	1.82965	5.60377	1.04402	5.11321	1.56476	4.16667	1.20386	7.08333	0.974308	5.65385	0.977438	5.5	1.33417	5.2	0.632456
332	电影拷贝	Movie copy	neutral	5.34783	0.640048	4.43478	1.39287	5.32	2.17068	7	1.34012	5.17391	0.387553	5.13043	0.457697	4	1.89297	6.68	1.4922	5.52174	0.790257	3.73913	1.65742	6.64	1.55134	7.32	1.10755	5.52174	0.790257	4.69565	1.39593	4.96	2.05102	6.84	1.34412	5.17391	0.387553	4.17391	1.37021	5.68	2.26789	7.16	1.34412	5.16667	0.389249	5.25	0.452267	3.84615	2.0755
333	电子手表	Digital watch	neutral	5.05	0.479372	4.4	1.39986	6.17391	2.16338	7.63043	1.19923	5.06122	0.242226	4.71429	1.08012	4.72727	1.51757	7	1.23443	5.03922	0.631214	4.09804	1.60318	7.5	1.79371	8.20833	0.832971	5.08163	0.276642	4.20408	1.49972	5.90909	2.54313	7.54545	1.37069	5.01961	0.616123	4.58824	1.28338	6.41667	1.76725	7.70833	1.0417	5	0	4.3913	1.46905	4.18182	1.94001
334	电子玩具	Electronic toy	neutral	5.34783	0.736882	4.82609	1.72954	5.97917	2.12873	7.54167	1.11008	5.27273	0.631085	5.13636	1.08213	4.91304	1.90485	6.95652	1.06508	5.41667	0.829702	4.54167	2.14637	6.96	1.85921	8.08	0.862168	5.52	0.822598	4.96	1.85921	5.91667	2.08341	7.41667	1.34864	5.14286	0.573212	4.66667	1.59164	6.04167	2.21613	7.66667	0.816497	5.46154	0.77625	5.23077	1.42325	5	1.59545
335	电子字典	Electronic dictionary	neutral	5.42222	0.965046	4.82222	1.45053	5.44	2.18679	7.06	1.84513	5.56522	1.12112	5.04348	1.60902	3.88	1.45258	6.12	2.10792	5.27273	0.767297	4.59091	1.2596	7	1.60728	8	0.816497	5.43478	0.992063	4.73913	1.42118	5.04	2.07123	6.56	2.21886	5.40909	0.959121	4.90909	1.50899	5.84	2.26716	7.56	1.22746	5.61538	1.19293	4.69231	1.88788	3.69231	1.54837
336	跌打滚爬	Tumble and climb	neutral	4.73913	1.35704	5.67391	1.01224	5.78	1.81029	7	1.48461	5	1.50756	5.43478	1.07982	5.6	1.95789	7	1.08012	4.47826	1.16266	5.91304	0.900154	5.96	1.67033	7	1.82574	4.72727	1.42032	5.77273	0.869144	5.41667	2.06243	7.25	1.39096	4.75	1.32698	5.58333	1.1389	6.11538	1.50537	6.76923	1.55712	4.7	1.70294	5.7	0.823273	5.33333	2.42462
337	跌跌撞撞	Stumble	negative	3.5625	1.1468	5.5	1.51587	4.98	1.82377	7.08	1.4119	3.4	1.41421	5.4	1.44338	5.16	1.92959	6.84	1.54596	3.73913	0.751809	5.6087	1.61637	4.8	1.73205	7.32	1.249	3.33333	1.12932	5.41667	1.71735	5	1.89297	7.24	1.5885	3.79167	1.14129	5.58333	1.31601	4.96	1.79072	6.92	1.22202	2.84615	1.21423	5.53846	1.45002	5.15385	2.0755
338	叮叮咚咚	Ding ding dong dong	neutral	4.3617	1.29255	5.2766	1.2459	5	1.1547	6.97959	1.37674	4.25	1.35935	5.45833	0.977093	4.875	1.32902	6.83333	1.27404	4.47826	1.23838	5.08696	1.47442	5.12	0.971253	7.12	1.48099	4	1.3817	5.43478	1.37597	4.75	1.15156	6.83333	1.57885	4.70833	1.12208	5.125	1.1156	5.24	1.12842	7.12	1.16619	3.91667	1.56428	5.58333	0.996205	4.75	1.42223
339	顶风冒雨	Against wind and rain	neutral	4.61905	1.42357	5.79048	1.10676	4.7551	2.25952	7.26531	1.05624	5.13208	1.35927	5.50943	1.18683	4.79167	2.44912	7.16667	1.09014	4.09615	1.30248	6.07692	0.946535	4.72	2.11187	7.36	1.03602	4.43396	1.21702	5.96226	0.919077	4.95833	2.27423	7.125	1.22696	4.80769	1.59704	5.61538	1.25485	4.56	2.2745	7.4	0.866025	4.85185	1.26198	5.81481	0.878681	5.33333	2.49848
340	定向招生	Orienteering enrolment	neutral	5.2	0.587754	4.68889	1.36219	3.72	1.72662	7.26	1.22574	5.31818	0.779888	5.04545	1.21409	3.96	1.81384	6.68	1.28193	5.08696	0.288104	4.34783	1.43364	3.48	1.63605	7.84	0.85049	5.13043	0.457697	4.56522	1.59049	3.76	1.66533	7.16	1.46287	5.27273	0.7025	4.81818	1.09702	3.68	1.81934	7.36	0.95219	5.09091	0.53936	5	1.41421	3.84615	1.72463
341	丢盔弃甲	Fly pellmell	negative	3.07692	1.11209	6.29808	1.34294	4.34694	2.03665	6.67347	1.84151	3.18519	1.0653	5.96296	1.46613	4.44	2.16179	6.4	1.97906	2.96	1.15987	6.66	1.09935	4.25	1.9393	6.95833	1.68056	3.07692	1.13494	6.26923	1.30031	4.2	2.02073	6.6	2.10159	3.07692	1.09984	6.32692	1.39637	4.5	2.08514	6.75	1.56733	3.11538	0.993053	5.96154	1.3109	4.23077	2.27866
342	丢三落四	Miss this and that	negative	3.04167	1.11008	5.39583	1.18033	4.40385	1.74063	7.53846	0.959198	2.76	1.26754	5.36	1.25433	5.14815	1.79108	7.33333	0.960769	3.34783	0.831685	5.43478	1.12112	3.6	1.29099	7.76	0.925563	3.04167	1.19707	5.29167	1.12208	4.19231	1.64971	7.53846	1.02882	3.04167	1.0417	5.5	1.25109	4.61538	1.83471	7.53846	0.904689	2.61538	1.3253	5.30769	1.18213	4.92857	1.68543
343	丢卒保车	Sacrifice minor things to save major ones	neutral	4.69388	1.54386	5.63265	1.45336	4.86275	1.93927	6.84314	1.37655	4.48	1.68622	5.32	1.51987	4.74074	2.123	6.92593	1.26873	4.91667	1.38051	5.95833	1.33447	5	1.74456	6.75	1.51083	4.52	1.1225	5.64	1.31909	4.92308	1.91673	6.69231	1.66779	4.875	1.89536	5.625	1.61009	4.8	2	7	1	4.69231	1.37747	5.46154	1.45002	4.78571	2.22498
344	东奔西忙	Busy	neutral	4.08511	1.1	5.59574	1.24516	4.4375	1.9776	7.14583	1.2546	4.34783	1.11227	5.47826	1.50362	5.33333	1.88049	7.16667	1.09014	3.83333	1.0495	5.70833	0.954585	3.54167	1.66757	7.125	1.42379	3.86957	1.01374	5.6087	1.55911	4.52174	2.33296	7.34783	1.40158	4.29167	1.16018	5.58333	0.880547	4.36	1.62993	6.96	1.09848	4.09091	1.13618	5.54545	2.0181	5.27273	2.41209
345	东征西战	Snoring around	neutral	4.79167	1.68798	6.02083	1.55042	3.86	1.90606	6.82	1.73429	4.76	1.85472	5.76	1.42244	4.08	2.13931	7.04	1.09848	4.82609	1.52709	6.30435	1.66337	3.64	1.65529	6.6	2.19848	4.08333	1.6129	5.45833	1.5598	3.72	1.76824	6.8	1.65831	5.5	1.47442	6.58333	1.34864	4	2.06155	6.84	1.8412	3.92308	1.75412	5.69231	1.54837	3.76923	1.92154
346	冬虫夏草	Cordyceps sinensis	neutral	5.54902	0.929468	4.58824	1.51136	4.73585	1.85172	7.37736	1.33339	5.28	0.671277	4.94	1.0184	4.10714	1.77094	7.10714	1.28638	5.80769	1.06713	4.25	1.81362	5.44	1.70978	7.68	1.34536	5.46	0.885484	4.64	1.43939	4.88462	1.72805	7.26923	1.4299	5.63462	0.970725	4.53846	1.58994	4.59259	1.9857	7.48148	1.25178	5.08333	0.50361	5.125	0.612372	4.42857	1.78516
347	动来动去	Moving around	negative	3.90426	1.08166	5.37234	1.0605	5.71429	1.6457	7.16327	1.17875	4.08	1.11505	5.24	1.09087	5.84	1.57268	6.92	1.18743	3.70455	1.03117	5.52273	1.02907	5.58333	1.74248	7.41667	1.1389	3.93478	1.15113	5.5	1.05529	5.88	1.58955	7.32	1.31403	3.875	1.03472	5.25	1.07339	5.54167	1.71893	7	1.02151	4.07692	1.38212	5.69231	0.947331	5.84615	1.51911
348	动物纤维	Animal fiber	neutral	5	0	4	1.60357	5.26	1.0844	6.26	1.74742	5	0	4.5	1.01183	4.96	0.840635	6.08	1.73013	5	0	3.47619	1.93956	5.56	1.22746	6.44	1.78139	5	0	3.4	1.84676	5.08	0.996661	6.24	1.56205	5	0	4.52174	1.16266	5.44	1.15758	6.28	1.94765	5	0	4.4	1.26491	4.84615	0.688737
349	洞若观火	To see things very clearly	neutral	4.73913	1.46719	5.43478	1.48552	5.32	1.65911	5.7	2.05287	4.31818	1.46015	5.45455	1.53459	4.76	0.723418	5.48	1.71075	5.125	1.39292	5.41667	1.47196	5.88	2.10792	5.92	2.3615	5.04545	1.73143	5.95455	1.64685	5.4	1.68325	5.56	2.21886	4.45833	1.14129	4.95833	1.16018	5.24	1.66533	5.84	1.90788	4	1.56347	6.1	2.02485	5	0.408248
350	都市农业	Urban agriculture	neutral	5.22222	0.703526	4.46667	1.73991	4.71429	1.56791	6.30612	1.68577	5.14286	0.358569	4.71429	1.0556	4.125	1.59653	6.375	1.40844	5.29167	0.907896	4.25	2.17196	5.28	1.33915	6.24	1.94251	5.18182	0.58849	4.22727	1.92556	4.70833	1.45898	6.04167	1.48848	5.26087	0.810016	4.69565	1.55021	4.72	1.69607	6.56	1.85023	5.1	0.316228	4.3	1.1595	4.41667	1.67649
351	斗鸡走狗	Enjoy cockfights and dogracing	negative	3.54167	1.55684	5.5	1.57101	5.3617	1.13109	5.2766	1.93033	3.24	1.50776	5.32	1.65126	5.04348	0.76742	5.65217	1.40158	3.86957	1.5755	5.69565	1.49042	5.66667	1.34056	4.91667	2.30154	3.58333	1.95419	5.25	1.72576	5.36364	0.847711	5.77273	1.87545	3.5	1.06322	5.75	1.39096	5.36	1.35031	4.84	1.90788	2.84615	1.77229	5.23077	1.69085	5.09091	0.700649
352	斗转星移	Passing of night	neutral	5.45098	0.981285	4.91176	1.39378	3.04082	1.56736	7.14286	1.35401	5.5098	0.902719	5.23529	1.03128	2.91667	1.81579	6.95833	1.65448	5.39216	1.05978	4.58824	1.62698	3.16	1.31276	7.32	0.988264	5.61538	1.03192	4.94231	1.58935	2.70833	1.62799	7.41667	1.1389	5.28	0.904411	4.88	1.17178	3.36	1.46856	6.88	1.50886	5.56	1.00333	5.36	1.11355	2.41667	1.78164
353	嘟嘟哝哝	Mumble in whispers	negative	3.58696	1.12696	5.02174	1.4528	5.2549	1.84221	6.96078	1.39944	3.41667	1.24819	5.125	1.39292	4.85185	1.9156	7.07407	1.035	3.77273	0.972567	4.90909	1.54023	5.70833	1.68056	6.83333	1.73623	3.54167	1.47381	4.83333	1.8098	5.04	1.7673	7.04	1.24097	3.63636	0.581087	5.22727	0.922307	5.46154	1.92314	6.88462	1.55761	3.07692	1.60528	5.30769	1.70219	4.64286	1.86495
354	独行其是	Do what one thinks is right regardless of others	neutral	4.26087	1.10423	5.52174	1.42578	5.36957	1.73024	6.23913	1.79115	4.31818	0.779888	5.22727	1.34277	5.13043	1.7137	6.65217	0.647281	4.20833	1.35066	5.79167	1.47381	5.6087	1.75134	5.82609	2.40553	4.22727	1.10978	5.5	1.33631	5.36364	1.49747	6.18182	1.78982	4.29167	1.12208	5.54167	1.53167	5.375	1.95187	6.29167	1.82921	4.3	0.674949	5.2	1.61933	5.18182	1.60114
355	独门独户	Alone	neutral	4.95455	0.645361	5.06818	1.26487	5.25	1.45134	6.9375	1.39003	5.14286	0.478091	5.04762	0.86465	4.78261	1.44463	6.86957	1.05763	4.78261	0.735868	5.08696	1.56417	5.68	1.34536	7	1.65831	4.95455	0.652998	5	1.27242	5.43478	1.37597	7.13043	1.32474	4.95455	0.652998	5.13636	1.28343	5.08	1.52534	6.76	1.45144	5.1	0.567646	5	1.1547	5.27273	1.42063
356	睹物思人	The thing reminds one of its owner	neutral	4.95833	1.62374	5.54167	1.48694	5.06122	2.0454	7.46939	1.17442	5.04167	1.36666	5.45833	1.21509	5.70833	1.75646	7.16667	0.916831	4.875	1.87228	5.625	1.73988	4.44	2.14243	7.76	1.33167	4.54167	1.444	5.45833	1.47381	5.29167	2.09511	7.5	1.35133	5.375	1.71471	5.625	1.52693	4.84	2.01412	7.44	1.00333	5	1.4771	5.41667	1.24011	6.41667	1.72986
357	端端正正	Sit or stand straight; righteous	positive	6.375	1.43845	4.79167	2.11337	6.15385	1.74204	7.53846	0.873612	6.68	1.249	5.36	1.97653	5.81481	1.98139	7.62963	0.92604	6.04348	1.58051	4.17391	2.12458	6.52	1.38804	7.44	0.820569	6.33333	1.16718	4.875	2.00678	6.23077	1.7506	7.57692	0.856648	6.41667	1.69184	4.70833	2.25503	6.07692	1.76461	7.5	0.905539	6.23077	1.09193	5.30769	1.70219	5.85714	2.0702
358	断子绝孙	Die without descendants	negative	1.84783	1.22868	7.36957	1.74303	3.18	1.5345	6.54	2.12094	1.5	0.722315	7.16667	2.03591	3.28	1.54164	6.16	2.11503	2.22727	1.54093	7.59091	1.36832	3.08	1.55242	6.92	2.1	1.79167	1.444	7.25	1.77544	3.41667	1.71735	6.91667	1.86307	1.90909	0.971454	7.5	1.73891	2.96154	1.34107	6.19231	2.3155	1.38462	0.650444	7.15385	1.99358	3.5	1.73205
359	对酒当歌	Sing while drinking	positive	6.23077	1.44297	6.09615	1.39011	6.05769	1.70827	7.34615	0.789257	5.55769	1.34912	5.75	1.31171	5.14815	1.74761	7.11111	0.697982	6.90385	1.20879	6.44231	1.39204	7.04	0.978093	7.6	0.816497	6.5283	1.47549	6.39623	1.2456	5.88	1.56312	7.32	0.802081	5.92157	1.35415	5.78431	1.47396	6.22222	1.84669	7.37037	0.791695	5.88462	1.33647	6.19231	1.16685	5.30769	1.75046
360	对症之药	Take relative measures to solve a problem	positive	6.28302	1.20123	5.77358	1.45591	5.125	2.26561	7.29167	1.03056	6.09434	1.14798	5.58491	1.46016	5.08333	2.04124	7.04167	0.858673	6.4717	1.23419	5.96226	1.44065	5.16667	2.51373	7.54167	1.14129	6.36538	1.13809	5.73077	1.48344	5.43478	2.50138	7.34783	1.19121	6.2037	1.26461	5.81481	1.44162	4.84	2.0347	7.24	0.879394	6.08	1.11505	5.64	1.38082	4.90909	2.58668
361	多吃多占	Consume and take more than one's due	negative	3.01471	1.27515	5.93137	1.23689	5.6	1.76126	6.58	1.75068	2.5	1.14731	6.28	1.08872	5.68	1.86458	6.88	1.61555	3.50962	1.20249	5.59615	1.28734	5.52	1.68622	6.28	1.86011	2.87	1.15533	6.02	1.09712	5.4	1.91485	6.92	1.28841	3.15385	1.37747	5.84615	1.36317	5.8	1.60728	6.24	2.08726	2.24	1.09087	6.28	1.33915	5.23077	2.35067
362	多愁多病	Laden with sorrow and maladies	negative	3	1.42887	5.95918	1.47138	3.74468	1.95012	7.02128	1.29362	2.72	1.33915	6.24	1.45144	4	1.84155	6.70833	1.30148	3.29167	1.48848	5.66667	1.46456	3.47826	2.06419	7.34783	1.22877	2.69231	1.31967	6.15385	1.56697	3.72727	2.16425	7.45455	1.1434	3.34783	1.49571	5.73913	1.35571	3.76	1.78606	6.64	1.31909	2.5	1.40055	6.5	1.5064	4.36364	2.54058
363	多情多义	Sentimental	positive	6.41905	1.24639	5.80952	1.44844	6.40426	1.54159	7.31915	1.10545	6.84615	0.977885	6.07692	1.63114	6.3913	1.37309	7.08696	1.04067	6	1.3445	5.54717	1.20202	6.41667	1.71735	7.54167	1.14129	6.56604	1.33747	5.98113	1.47401	6.81818	1.50036	7.54545	1.05683	6.26923	1.13958	5.63462	1.41461	6.04	1.51327	7.12	1.1299	7.14815	1.06351	6.2963	1.87729	6.54545	1.63485
364	多姿多彩	Colorful	positive	6.97917	0.956269	5.79167	1.82137	5.22917	1.81295	7.25	0.910927	7.08	0.996661	6	2	4.6087	1.77711	7.04348	0.824525	6.86957	0.919701	5.56522	1.61881	5.8	1.68325	7.44	0.960902	7.11538	1.07059	5.76923	2.10348	5.34783	1.84905	7.26087	0.915393	6.81818	0.795006	5.81818	1.46828	5.12	1.81016	7.24	0.925563	7.07143	1.07161	6	2.2188	4.63636	1.74773
365	哆哆嗦嗦	Shiver	negative	3.31111	0.949216	5.55556	1.42311	4.68085	1.61658	7.10638	1.25515	3.22727	1.066	5.81818	1.33225	4.77273	1.50971	6.95455	1.0455	3.3913	0.838783	5.30435	1.49042	4.6	1.73205	7.24	1.42244	3.34783	1.07063	5.47826	1.64785	4.56522	1.72748	7.26087	1.32175	3.27273	0.827032	5.63636	1.17698	4.79167	1.53167	6.95833	1.19707	3	1.3484	6	1.4771	5	2.09762
366	躲躲藏藏	Hide	negative	3.23913	0.82151	5.45652	1.16822	5.18367	1.88937	7.38776	1.05705	3.17391	1.02922	5.47826	1.3774	5.56	2.04287	7.16	1.17898	3.30435	0.558796	5.43478	0.945135	4.79167	1.66757	7.625	0.875388	3.125	1.03472	5.54167	1.25036	4.66667	1.9708	7.41667	1.21285	3.36364	0.492366	5.36364	1.09307	5.68	1.70098	7.36	0.907377	2.92308	1.25576	5.53846	1.5064	5.16667	2.329
367	恶声恶气	Angry voices and hard words	negative	2.3125	1.1328	6.27083	2.01842	4.59184	1.82481	6.77551	1.59772	2.33333	1.20386	5.91667	2.24416	4.75	1.89393	6.5	1.56038	2.29167	1.08264	6.625	1.73988	4.44	1.78139	7.04	1.61967	2.17391	1.02922	6.34783	2.05843	4.45833	1.84106	6.75	1.75078	2.44	1.22746	6.2	2.02073	4.72	1.83757	6.8	1.47196	2	1.09545	6.18182	2.22792	4.75	1.95982
368	恶言恶语	Cursing	negative	2.34783	1.09985	6.71739	1.70832	5.0625	1.89519	7.02083	1.13905	2.18182	1.05272	6.5	1.99404	5.30435	1.81996	6.86957	0.967863	2.5	1.14208	6.91667	1.41165	4.84	1.97231	7.16	1.28062	2.16667	1.23945	6.875	1.75233	5.04	1.7195	7.04	1.2741	2.54545	0.911685	6.54545	1.68261	5.08696	2.10871	7	1	2	1.2792	6.66667	1.96946	5.07692	1.97744
369	恶语伤人	Speak daggers to sb	negative	2.34783	0.9937	6.58696	1.72016	5.04255	2.16652	7.34043	1.16613	2.22727	0.972567	6.18182	1.99132	5.16667	2.11961	7.125	0.899879	2.45833	1.02062	6.95833	1.36666	4.91304	2.25455	7.56522	1.37597	2.25	1.07339	6.875	1.59653	4.78261	2.02162	7.47826	1.3774	2.45455	0.911685	6.27273	1.83048	5.29167	2.31214	7.20833	0.931533	2.16667	1.11464	6.41667	1.78164	4.91667	2.23437
370	恶语中伤	Viciously slander	negative	2.30476	0.931539	6.75238	1.19116	4.44898	2.02136	7.10204	1.02561	2.2963	1.0574	6.5	1.24005	5.125	2.09165	7.08333	1.01795	2.31373	0.787152	7.01961	1.0861	3.8	1.75594	7.12	1.05357	2.24074	1.00818	6.77778	1.19222	4.34783	2.0804	7.21739	0.951388	2.37255	0.847603	6.72549	1.20131	4.53846	2.00461	7	1.09545	2.2069	1.14578	6.68966	1.39139	5.45455	2.29624
371	饿虎扑食	(rush at... like) a hungry tiger at its prey	negative	3.52174	1.531	6.30435	1.64478	3.91667	1.98755	6.64583	1.73192	3.31818	1.2868	6.27273	1.35161	3.41667	1.74248	6.33333	1.99274	3.70833	1.73153	6.33333	1.90347	4.41667	2.12473	6.95833	1.39811	3.29167	1.62799	6.45833	1.38247	4.17391	2.12458	7.04348	1.3307	3.77273	1.41192	6.13636	1.90976	3.68	1.86458	6.28	1.98997	3.08333	1.56428	6.41667	1.37895	3.81818	1.94001
372	饿虎扑羊	A hungry tiger pouncing on its prey	negative	3.42222	1.54462	6.46667	1.28982	4.06122	1.98335	6.69388	1.71031	3.45455	1.76547	6.04545	1.36198	3.64	2.19621	6.36	2.15793	3.3913	1.33958	6.86957	1.09977	4.5	1.66812	7.04167	0.999094	3.26087	1.5141	6.6087	1.2699	4.16	2.17332	6.28	1.98997	3.59091	1.59341	6.31818	1.32328	3.95833	1.80529	7.125	1.2619	3.16667	1.74946	6.16667	1.2673	3.84615	2.51151
373	恩断义绝	End the relationship	negative	2.04444	1.10691	7.31111	1.80683	4.5625	2.21125	7.22917	1.18931	1.86364	0.990212	6.90909	2.26588	4.47826	2.08609	6.86957	1.25424	2.21739	1.20441	7.69565	1.14554	4.64	2.36079	7.56	1.04403	1.91304	1.27611	7.69565	1.55021	4.69565	2.1833	7.13043	1.21746	2.18182	0.906924	6.90909	1.99783	4.44	2.2745	7.32	1.1804	1.58333	0.996205	7.58333	1.83196	4.36364	1.74773
374	恩恩爱爱	A couple in love	positive	7.37778	1.23009	6.24444	1.94417	6.10204	1.73499	7.79592	0.889279	7.47619	1.07792	6.90476	1.78619	6.4	1.63299	7.76	0.969536	7.29167	1.36666	5.66667	1.92617	5.79167	1.81729	7.83333	0.816497	7.47826	1.47308	6.34783	1.96813	6.29167	1.36666	7.875	0.899879	7.27273	0.935125	6.13636	1.959	5.92	2.03961	7.72	0.890693	7.72727	1.27208	7.27273	1.55505	6.76923	1.42325
375	恩恩怨怨	Engraining and resentment	negative	3.5	1.25478	5.875	1.39337	4.76596	1.84406	7.23404	0.839585	3.36	1.38082	5.84	1.46287	5.17391	1.94591	7.17391	0.777652	3.65217	1.11227	5.91304	1.34547	4.375	1.68916	7.29167	0.907896	2.95833	1.19707	6.375	1.31256	4.34783	1.79921	7.17391	0.984063	4.04167	1.08264	5.375	1.31256	5.16667	1.83366	7.29167	0.690253	2.46154	1.05003	6.53846	1.56074	4.54545	2.06706
376	恩将仇报	Bite the hand that feeds one	negative	2.01961	0.922549	7.14706	1.40999	4.44898	2.05204	7.57143	1.04083	2.04	0.946745	7.08	1.42628	4.48	1.93907	7.24	1.05198	2	0.907485	7.21154	1.40498	4.41667	2.20507	7.91667	0.928611	1.7451	0.890913	7.43137	1.2846	4.72	1.98997	7.48	0.962635	2.29412	0.878501	6.86275	1.4835	4.16667	2.11961	7.66667	1.12932	1.56	0.768115	7.6	1.19024	4.61538	1.89466
377	耳朵根子	Ear	neutral	4.79545	0.509425	4.22727	1.55315	4.81633	1.70384	7.14286	1.1547	4.90909	0.294245	4.68182	1.2868	4.6	1.73205	6.92	1.15181	4.68182	0.646335	3.77273	1.68839	5.04167	1.68056	7.375	1.13492	4.66667	0.637022	4	1.74456	5.08	1.38203	7.28	1.06145	4.95	0.223607	4.5	1.27733	4.54167	1.97768	7	1.25109	4.84615	0.375534	4.46154	1.6641	5.07692	1.5525
378	耳根清净	Quietness	positive	6.02128	1.20667	4.3617	1.49529	6.04167	1.76199	7.16667	1.29374	5.79167	1.14129	4.91667	1.31601	5.3913	1.52968	7.04348	0.975997	6.26087	1.25109	3.78261	1.47576	6.64	1.7767	7.28	1.54164	6.125	1.42379	4.58333	1.31601	5.64	1.95533	7.16	1.37477	5.91304	0.949308	4.13043	1.6598	6.47826	1.44189	7.17391	1.23038	5.76923	1.42325	5	1.22474	5	1.82574
379	耳濡目染	Be influenced by what one constantly sees and hears	neutral	5.8	1.23583	5.2	1.72679	4.80851	1.94085	7.40426	1.19163	5.86364	1.32001	5.86364	1.28343	4.83333	1.85722	7.04167	1.30148	5.73913	1.17618	4.56522	1.87873	4.78261	2.0661	7.78261	0.951388	5.86957	1.17954	5.04348	1.91829	4.78261	1.95301	7.56522	1.12112	5.72727	1.3159	5.36364	1.52894	4.83333	1.9708	7.25	1.25974	5.83333	1.52753	5.91667	1.44338	5.25	2.09436
380	二次能源	Secondary energy	neutral	5.69565	1.15219	5.43478	1.1086	5.01887	1.52531	6.90566	1.45792	5.56522	0.945135	5.65217	0.934622	4.57143	1.73052	6.39286	1.54774	5.82609	1.33662	5.21739	1.24157	5.52	1.08474	7.48	1.1225	5.79167	1.06237	5.58333	0.829702	5.30769	1.54322	6.57692	1.77027	5.59091	1.2596	5.27273	1.35161	4.74074	1.48305	7.22222	1.01274	5.69231	1.03155	5.76923	0.83205	4.85714	1.87523
381	二龙戏珠	Two dragons are playing with a pearl	neutral	5.7551	0.902095	5.63265	1.49574	4.36735	1.4097	6.08163	2.10987	5.72	0.979796	5.68	1.249	3.84	1.772	6.24	2.02649	5.79167	0.832971	5.58333	1.74248	4.91667	0.50361	5.91667	2.2247	5.84	0.986577	5.68	1.37598	4.48	1.5843	5.6	2.53311	5.66667	0.816497	5.58333	1.63964	4.25	1.22474	6.58333	1.44212	5.69231	1.1094	6.23077	0.83205	4	2.08167
382	法国梧桐	Oriental plane	neutral	5.41304	0.832028	4.5	1.62959	5	1.34164	6.29412	1.8793	5.13636	0.35125	4.5	1.26303	4.65385	1.32491	6.42308	1.52769	5.66667	1.0495	4.5	1.93368	5.36	1.28712	6.16	2.21133	5.52	0.822598	4	1.84842	5.2	0.957427	6.6	1.55456	5.28571	0.845154	5.09524	1.09109	4.80769	1.62528	6	2.13542	5.15385	0.375534	4.15385	1.57301	4.92308	0.27735
383	帆船运动	Sailing	neutral	5.52174	0.862532	5.54348	1.60148	5.04	1.61574	6.74	1.46817	5.68182	0.779888	6.04545	1.3965	4.69231	1.66779	6.57692	1.30148	5.375	0.923721	5.08333	1.66594	5.41667	1.50121	6.91667	1.63964	5.5	0.672593	5.5	1.62569	4.92	1.89121	6.76	1.71464	5.54167	1.02062	5.58333	1.6129	5.16	1.31276	6.72	1.2083	5.8	0.788811	6.1	1.19722	4.38462	2.10311
384	翻来覆去	Toss about	negative	3.78261	1.17214	5.34783	1.41763	5.18	1.89187	7.22	1.14802	3.48	1.32665	5.36	1.35031	5.32	1.6	7.08	1.07703	4.14286	0.853564	5.33333	1.52753	5.04	2.16949	7.36	1.22066	3.69565	1.14554	5.21739	1.24157	5.20833	1.74404	7	1.31876	3.86957	1.21746	5.47826	1.59173	5.15385	2.05314	7.42308	0.945434	3.30769	1.31559	5.15385	1.40512	5.41667	1.50504
385	翻脸无情	Ruthless	negative	2.73913	1.48226	6.67391	1.67404	4.12	2.05675	7.24	1.15281	2.56522	1.03687	6.13043	1.93777	4.15385	1.84808	7.26923	1.04145	2.91304	1.83187	7.21739	1.16605	4.08333	2.30154	7.20833	1.28466	2.3913	0.988071	6.78261	1.73091	4.12	1.81016	7.36	0.994987	3.08696	1.80688	6.56522	1.64665	4.12	2.31517	7.12	1.30128	2.45455	0.8202	6.18182	1.88776	4.46154	1.76141
386	繁星点点	Starry	positive	6.33645	1.18117	5.00935	1.73475	3.87755	1.81007	7.55102	1.0813	5.98113	1.08292	5.18868	1.58183	3.20833	1.7932	7.375	1.0135	6.68519	1.17881	4.83333	1.87083	4.52	1.61038	7.72	1.13725	6.45455	1.19905	5	1.86587	3.8	1.77951	7.56	1.19304	6.21154	1.1604	5.01923	1.60258	3.95833	1.87615	7.54167	0.977093	6.21429	1.13389	5.14286	1.95721	3.07692	1.801
387	反动权威	Counter authority	negative	3.47917	1.41406	5.66667	1.6927	3.95652	1.99952	6.26087	2.03781	3.20833	1.444	5.45833	1.81729	3.78261	1.83294	6.3913	1.75134	3.75	1.35935	5.875	1.56906	4.13043	2.18058	6.13043	2.32192	3.56522	1.59049	5.6087	1.77711	3.54545	1.79224	6.22727	2.06863	3.4	1.25831	5.72	1.64621	4.33333	2.14003	6.29167	2.05319	3	1.54919	5.45455	1.91644	3.45455	2.0181
388	反反复复	Over and over	negative	3.97959	0.94626	5.34694	1.25085	4.91837	1.61808	7.34694	0.990602	4.12	0.927362	5.56	0.960902	5.08333	1.5299	7	0.780189	3.83333	0.963087	5.125	1.48361	4.76	1.71464	7.68	1.06927	3.84615	1.00766	5.61538	1.0612	5.04348	1.29609	7.21739	0.998022	4.13043	0.868873	5.04348	1.39734	4.80769	1.87658	7.46154	0.989172	4.07143	1.14114	5.85714	1.02711	4.90909	1.3751
389	反咬一口	Make false countercharges	negative	2.14286	0.935414	6.97959	1.29887	4.12766	1.9067	7.21277	1.1021	2.08	0.953939	7.12	1.42361	4.625	1.92946	6.70833	0.954585	2.20833	0.931533	6.83333	1.16718	3.6087	1.77711	7.73913	1.00983	2.28	0.791623	7.12	1.20139	4.6087	2.03914	7.30435	1.18455	2	1.06322	6.83333	1.40393	3.66667	1.6854	7.125	1.03472	2.30769	0.85485	7	1.29099	4.72727	2.24013
390	饭来张口	Eat a ready-cooked meal	negative	3.5514	1.42242	5.68224	1.24838	5.7451	1.89571	7.41176	1.25182	4.03704	1.34533	5.42593	1.20693	6.19231	1.60048	7.30769	1.08699	3.0566	1.33611	5.9434	1.24677	5.28	2.09205	7.52	1.41774	3.65385	1.35595	5.57692	1.419	6.04	1.81384	7.48	1.47535	3.45455	1.48845	5.78182	1.06616	5.46154	1.9643	7.34615	1.01754	3.92308	1.38342	5.34615	1.38397	6.69231	1.4367
391	泛泛而谈	Speak generally	neutral	4.3125	1.25742	4.8125	1.52506	5.53061	1.58248	7.06122	1.63819	4.5	1.28537	4.66667	1.52277	5.44	1.38684	6.56	1.85023	4.125	1.22696	4.95833	1.5458	5.625	1.78916	7.58333	1.21285	4.36	1.22066	4.28	1.79165	5.96	1.48549	6.6	2	4.26087	1.32175	5.3913	0.891328	5.08333	1.58572	7.54167	0.977093	4.38462	1.26085	4.15385	1.72463	5.61538	1.44559
392	泛泛之交	A speaking acquaintance	neutral	4.49524	0.856242	4.77143	1.1457	5.52083	1.2546	7.04167	1.54312	4.59615	0.7211	4.86538	1.04841	5.43478	1.47174	6.91304	1.16436	4.39623	0.967543	4.67925	1.23683	5.6	1.04083	7.16	1.8412	4.4717	0.868327	4.77358	1.06774	5.58333	1.41165	7.20833	1.35066	4.51923	0.851536	4.76923	1.23058	5.45833	1.10253	6.875	1.72734	4.62963	0.741524	4.66667	1.1767	5.16667	1.6967
393	方寸已乱	One's heart is already upset	negative	3.27184	1.02128	6.09709	1.32483	4.0625	1.79131	6.83333	1.05857	3.13462	0.990719	5.94231	1.41993	3.91304	1.83187	6.56522	1.12112	3.41176	1.04262	6.2549	1.21397	4.2	1.77951	7.08	0.953939	3.21154	1.09072	6.30769	1.2452	3.65217	2.01379	7.17391	1.19286	3.33333	0.95219	5.88235	1.38054	4.44	1.50222	6.52	0.822598	3.15385	0.967153	6.38462	1.02282	3.45455	2.25227
394	芳香扑鼻	It's aromatic with nose	positive	6.76596	1.28896	5.7234	1.84982	4.67308	1.91712	7.26923	0.888166	6.47826	1.344	5.69565	2.03235	4.11111	1.78311	7.11111	0.974022	7.04167	1.19707	5.75	1.70038	5.28	1.90438	7.44	0.768115	6.82609	1.33662	5.56522	1.92652	5.07692	1.99846	7.15385	0.92487	6.70833	1.26763	5.875	1.80127	4.26923	1.77894	7.38462	0.852147	6.63636	1.43337	5.90909	2.2563	4.57143	2.06488
395	防弹背心	Bulletproof vest	neutral	5.24752	0.684192	5.17822	1.26013	4.9	2.19694	6.7	2.02283	5.10204	0.42056	5.08163	0.640206	4.04	2.11108	6.52	2.0025	5.38462	0.843751	5.26923	1.64633	5.76	1.96384	6.88	2.06801	5.25	0.653047	5.21154	1.45974	5.04	2.3	6.8	2.10159	5.2449	0.722571	5.14286	1.02062	4.76	2.12681	6.6	1.97906	5.04	0.454606	5.12	0.781025	4.23077	2.42053
396	防弹玻璃	Bullet-proof glass	neutral	5.18182	0.522233	4.85859	1.36285	4.64	2.03801	7.02	1.2534	5.16667	0.595491	4.95833	0.966642	3.81481	1.90217	6.77778	1.2195	5.19608	0.44809	4.76471	1.65636	5.6087	1.77711	7.30435	1.25896	5.12766	0.337318	4.82979	1.40371	5.04	1.96808	6.88	1.39403	5.23077	0.645205	4.88462	1.33804	4.24	2.0672	7.16	1.10604	5.04545	0.213201	4.90909	0.811177	4.14286	1.87523
397	防洪设施	Flood control facilities	neutral	5.13636	0.701855	4.63636	1.47996	4.55769	2.10893	7.13462	1.08517	5	0	4.95	0.604805	3.96429	2.25228	7.07143	1.15241	5.25	0.944089	4.375	1.9068	5.25	1.72576	7.20833	1.02062	5.04762	0.384212	4.28571	1.67758	4.48	2.06398	7	1.29099	5.21739	0.902347	4.95652	1.22394	4.62963	2.18646	7.25926	0.859006	5	0	4.88889	0.781736	3.92857	2.23484
398	防护林带	Shelterbelt	neutral	5.70588	0.874142	4.84314	1.52695	4.61224	1.81218	7.12245	1.14805	5.84314	0.987371	5.19608	1.49692	4.45833	2.06375	7.04167	0.954585	5.56863	0.728146	4.4902	1.48825	4.76	1.56205	7.2	1.32288	5.73077	0.888166	4.67308	1.53036	4.43478	1.94997	7	1.3817	5.68	0.867556	5.02	1.51846	4.76923	1.70429	7.23077	0.908083	5.85185	1.06351	5.03704	1.58069	3.63636	2.4606
399	防汛抗洪	Flood prevention and flood control	neutral	5.37778	1.38644	6.08889	1.4897	4.07843	2.25249	7.43137	1.10009	5.61905	1.2836	6.09524	1.13599	3.85185	2.53747	7.37037	1.07946	5.16667	1.46456	6.08333	1.76725	4.33333	1.90347	7.5	1.14208	4.95652	1.29609	5.86957	1.6598	4.44	2.48462	7.4	1.19024	5.81818	1.36753	6.31818	1.2868	3.73077	1.99113	7.46154	1.02882	5.27273	1.00905	5.63636	0.6742	4.30769	3.03822
400	飞沙走石	Flying sand and rolling pebbles	negative	4	1.47442	5.78723	1.66728	3.54167	1.48694	6.6875	1.24039	3.52174	1.50362	6	1.3817	2.78261	1.41282	6.82609	0.834058	4.45833	1.31807	5.58333	1.90917	4.24	1.2	6.56	1.52971	4.17391	1.43502	5.78261	1.65025	3.34783	1.6127	6.6087	1.52968	3.83333	1.52277	5.79167	1.71893	3.72	1.36991	6.76	0.925563	3.72727	1.55505	6.27273	1.19087	2.36364	1.36182
401	非亲非故	Be neither relative nor friend	neutral	4.3913	1.1051	4.69565	1.57578	4.67347	1.57305	7.06122	1.14397	4.82609	0.886883	4.65217	0.982052	4.8	1.68325	6.8	1.08012	3.95652	1.14726	4.73913	2.02748	4.54167	1.47381	7.33333	1.16718	4.34783	1.11227	4.78261	1.70445	4.48	1.35769	6.92	1.25565	4.43478	1.12112	4.6087	1.46905	4.875	1.77697	7.20833	1.02062	4.83333	0.57735	4.83333	1.19342	4.61538	1.60927
402	非我族类	Outsider	neutral	4.15686	1.01225	5.57843	1.05714	4.2449	1.45101	5.95918	1.84796	4.44	0.951047	5.32	0.683329	4.125	1.51263	6.125	1.22696	3.88462	1.00301	5.82692	1.27911	4.36	1.41067	5.8	2.3094	4.27451	0.826521	5.47059	0.924185	4.45833	1.35066	5.83333	1.73623	4.03922	1.16552	5.68627	1.17457	4.04	1.54056	6.08	1.97737	4.56	0.768115	5.32	0.556776	4.41667	1.50504
403	肥肥胖胖	Fat	negative	3.95833	1.16616	5.1875	1.63286	5	1.74404	7.18367	1.33344	4.25	1.11316	5.33333	0.916831	5.32	1.70098	6.92	1.35154	3.66667	1.16718	5.04167	2.13621	4.66667	1.76109	7.45833	1.28466	3.88	0.927362	5.32	1.62583	4.79167	1.7932	7.54167	1.02062	4.04348	1.39734	5.04348	1.66456	5.2	1.70783	6.84	1.51877	4	1.08012	5.53846	0.77625	4.92308	2.06
404	肥水外流	Rich water outflow	negative	3.67347	1.17947	5.59184	1.35275	4.48077	1.76558	6.98077	1.59029	3.56	1.08321	5.68	1.249	4.53571	1.87542	6.78571	1.54817	3.79167	1.28466	5.5	1.47442	4.41667	1.66594	7.20833	1.64129	3.61538	1.02282	5.73077	1.28243	4.64	2.09921	6.96	1.79072	3.73913	1.35571	5.43478	1.44052	4.33333	1.41421	7	1.41421	3.57143	0.937614	5.42857	1.39859	5	2.2532
405	废话连篇	Talk downright nonsense	negative	2.75962	1.06575	6.16346	1.16678	5.5625	1.73703	7.25	1.19396	3.05882	1.12092	5.84314	1.23891	5.70833	1.57367	6.79167	1.10253	2.4717	0.932403	6.4717	1.01154	5.41667	1.90917	7.70833	1.12208	2.90385	1.1759	6.07692	1.15209	5.17391	1.74908	7.26087	1.28691	2.61538	0.932083	6.25	1.18611	5.92	1.68127	7.24	1.12842	3.15385	1.31734	5.84615	1.28662	5.09091	1.57826
406	废铜烂铁	Scrap iron	negative	3.60417	1.31666	4.85417	1.28807	5.08	1.91493	6.84	1.44787	3.52	1.32665	5	0.866025	4.4	1.47196	6.88	1.26886	3.69565	1.32921	4.69565	1.63581	5.76	2.08726	6.8	1.63299	3.625	1.43898	4.75	1.42188	4.625	1.52693	6.875	1.39292	3.58333	1.21285	4.95833	1.16018	5.5	2.1587	6.80769	1.52366	3.53846	1.5064	4.92308	0.954074	4.33333	1.37069
407	分兵把守	Divide the forces for defense	neutral	5.06383	1.1685	5.42553	1.19318	4.85417	2.15357	6.52083	1.89051	5.21739	1.1264	5.56522	1.07982	4.2	2.3094	6.72	1.45831	4.91667	1.21285	5.29167	1.30148	5.56522	1.7536	6.30435	2.28503	4.88	1.16619	5.44	1.26095	4.43478	2.40881	6.86957	1.76595	5.27273	1.16217	5.40909	1.14056	5.24	1.85472	6.2	1.97906	5.15385	1.3445	5.69231	1.31559	3.5	2.43086
408	纷纷而至	One after another	neutral	5.13636	1.00211	5.11364	1.46614	4.88889	1.58433	6.84444	1.1862	5.33333	0.795822	5.33333	0.856349	4.86957	1.5755	6.69565	1.01957	4.95652	1.14726	4.91304	1.85651	4.90909	1.63034	7	1.34519	4.78261	0.902347	4.69565	1.32921	4.82609	1.69631	6.95652	1.29609	5.52381	0.980767	5.57143	1.50238	4.95455	1.4953	6.72727	1.07711	4.90909	0.53936	5.09091	0.301511	4.75	1.81534
409	纷纷扬扬	Fluttering	neutral	4.97872	1.49622	5.61702	1.43789	4.97917	0.956269	7.04167	1.27092	4.95652	1.36443	5.78261	1.0853	4.96	0.734847	6.76	1.26754	5	1.64184	5.45833	1.71893	5	1.16775	7.34783	1.22877	4.75	1.56733	5.625	1.20911	4.95833	0.624094	7.04167	1.51741	5.21739	1.41282	5.6087	1.67167	5	1.21584	7.04167	0.999094	4.5	1.50756	5.91667	0.996205	4.84615	0.5547
410	奋勇当先	Muster one's courage and fight in the vanguard	positive	6.76471	1.16191	6.79412	1.31509	6.32653	1.63793	7.32653	1.06825	6.94	1.23569	6.72	1.5124	5.73077	1.92993	7.11538	1.03255	6.59615	1.07118	6.86538	1.10309	7	0.852803	7.56522	1.07982	6.66667	1.35154	6.86275	1.26522	6.5	1.7693	7.375	1.09594	6.86275	0.938501	6.72549	1.37227	6.16	1.51877	7.28	1.06145	6.79167	1.50302	7.08333	1.31601	6	2.19848
411	丰产丰收	Bumper harvest	positive	7.33333	1.5667	7.15556	1.63701	5.16667	2.12716	7.20833	0.944375	7.52174	1.3774	7.47826	1.27456	4.91304	2.15139	7.17391	1.07247	7.13636	1.75378	6.81818	1.91824	5.4	2.12132	7.24	0.830662	7.72727	1.45346	7.54545	1.1434	5.26087	2.09366	7.13043	1.09977	6.95652	1.60902	6.78261	1.95301	5.08	2.19697	7.28	0.791623	7.58333	1.72986	7.91667	0.996205	4.90909	2.34327
412	丰衣足食	To have ample food and clothing	positive	7.30189	1.07942	5.88679	1.94359	5.69388	2.12332	7.77551	1.00551	7.38462	1.10531	6.21154	2.09889	4.5	2.1587	7.61538	0.982931	7.22222	1.05806	5.57407	1.74401	7.04348	0.975997	7.95652	1.02151	7.32075	1.10547	5.9434	1.91568	5.8	1.89297	7.64	1.03602	7.28302	1.06297	5.83019	1.98781	5.58333	2.37591	7.91667	0.974308	7.19231	1.23351	6.65385	1.87494	5	2.19848
413	风吹不动	No wind hurts	neutral	5.21569	0.981285	4.71569	1.34516	5.26	1.93581	6.84	1.40495	5.18367	0.950295	4.91837	1.11499	4.8	2.21736	6.88	1.30128	5.24528	1.01727	4.5283	1.51408	5.72	1.51438	6.8	1.52753	5.24	0.59109	4.58	1.10823	5.4	1.93649	6.8	1.65831	5.19231	1.25305	4.84615	1.53884	5.12	1.96469	6.88	1.1299	5.20833	0.658005	5.08333	0.974308	5.07692	2.4311
414	风吹浪打	Be beaten by wind and waves	neutral	4.85106	1.35099	5.70213	1.34996	3.8	1.90595	6.86	1.64143	4.82609	1.40299	5.34783	1.6127	3.6	1.84842	6.76	1.56205	4.875	1.32902	6.04167	0.954585	4	1.97906	6.96	1.74356	4.52174	1.12288	5.69565	1.32921	3.92	1.91311	6.84	1.772	5.16667	1.49395	5.70833	1.39811	3.68	1.93046	6.88	1.53623	4.36364	0.924416	5.45455	1.57249	4	2.08167
415	风吹雨淋	Wind and rain	neutral	4.11364	1.24295	5.61364	0.654711	3.54717	1.48798	7.39623	0.926939	4.36364	1.21677	5.68182	0.779888	3.60714	1.66309	7.17857	0.862965	3.86364	1.24577	5.54545	0.509647	3.48	1.29486	7.64	0.95219	3.82609	1.07247	5.56522	0.50687	3.46154	1.50282	7.38462	1.02282	4.42857	1.36277	5.66667	0.795822	3.62963	1.49739	7.40741	0.843949	4	0.953463	5.58333	0.514929	3.5	1.74312
416	风风光光	Love ostentation	positive	6.80583	1.13809	6.28155	1.44451	5.52	1.6932	7.18	1.024	6.53846	1.14552	5.84615	1.5766	4.6	1.80278	7.08	1.11505	7.07843	1.07412	6.72549	1.15028	6.44	0.916515	7.28	0.936305	7.1	1.11117	6.3	1.68123	5.36	1.84572	7.2	1	6.5283	1.10251	6.26415	1.19536	5.68	1.54704	7.16	1.06771	6.8	0.957427	5.6	1.91485	4.38462	1.98068
417	风风火火	Be rash and too much in haste	neutral	5.65385	1.23673	5.875	1.13794	5.44681	1.54369	6.85106	1.19744	5.49057	1.17051	5.64151	1.12821	4.78261	1.62247	6.78261	0.850482	5.82353	1.2916	6.11765	1.1072	6.08333	1.17646	6.91667	1.47196	5.43396	1.27866	5.92453	0.977616	5.63636	1.46533	7	0.92582	5.88235	1.16012	5.82353	1.2916	5.28	1.6207	6.72	1.4	5.44444	1.1209	6.03704	0.897924	4.63636	1.43337
418	风光如画	Picturesque scenery	positive	7.18868	1.13903	5.96226	1.86151	4.33333	1.46515	7.21569	1.11917	7.39623	1.14924	6.50943	1.77182	4	1.46969	7	0.938083	6.98113	1.10053	5.41509	1.80207	4.68	1.40594	7.44	1.26095	7.50943	0.992717	5.60377	2.08787	4.28	1.33915	7.28	1.33915	6.86792	1.19354	6.32075	1.5414	4.38462	1.60192	7.15385	0.880559	7.61538	1.09825	6.15385	2.0138	3.92308	1.49786
419	风和日暖	Warm and sunny weather	positive	7.08333	1.23484	5.1875	2.2846	3.92308	1.82409	7.51923	0.91802	7.32	1.28193	5.8	2.29129	3.40741	1.69296	7.25926	0.859006	6.82609	1.15413	4.52174	2.12922	4.48	1.82848	7.8	0.912871	7.36	1.28712	5.08	2.39653	4.57692	1.94264	7.5	0.948683	6.78261	1.1264	5.30435	2.20402	3.26923	1.45761	7.53846	0.904689	7.30769	1.60128	5.92308	2.66025	4.07143	1.94004
420	风花雪月	Romantic theme	positive	6.0625	1.54928	5.70833	1.47256	4.2449	1.73842	7.2449	1.25051	6.32	1.34536	5.44	1.44568	3.45833	1.61458	7.04167	0.690253	5.78261	1.73091	6	1.4771	5	1.52753	7.44	1.60935	6.24	1.64012	5.84	1.31276	4.30435	1.71715	7.08696	1.47442	5.86957	1.45553	5.56522	1.64665	4.19231	1.78928	7.38462	1.02282	6.71429	1.43734	5.78571	1.52812	3.36364	1.91169
421	风流儒雅	Cultured, talented and refined	positive	6.44681	1.03857	5.42553	1.62514	5.64	1.77005	7.06	1.43442	6.33333	1.12932	5.29167	1.68056	5.24	1.71464	6.92	1.32035	6.56522	0.945135	5.56522	1.59049	6.04	1.7673	7.2	1.55456	6.79167	1.06237	5.33333	1.73623	5.36	1.91224	7	1.47196	6.08696	0.900154	5.52174	1.53355	5.92	1.6052	7.12	1.42361	6.69231	0.947331	5.07692	2.01914	4.92308	2.10006
422	风流云散	Dispersed by the wind and scattered like the clouds	neutral	5.3913	0.954015	4.71739	1.18627	3.9375	1.34332	6.1875	1.51104	5.54167	0.779028	4.95833	0.999094	3.75	1.35935	6.04167	1.23285	5.22727	1.10978	4.45455	1.3355	4.125	1.32902	6.33333	1.76109	5.31818	0.893701	5	0.9759	3.65217	1.36877	6.13043	1.6041	5.45833	1.02062	4.45833	1.31807	4.2	1.29099	6.24	1.45144	5.41667	0.514929	5	0.852803	3.54545	1.4397
423	风流罪过	The crime of promiscuity	negative	3.34043	1.6455	5.82979	1.71082	4.4375	1.58324	5.89583	1.87071	3.17391	1.52709	5.3913	2.03914	4.34783	1.5553	5.52174	1.59173	3.5	1.7693	6.25	1.22474	4.52	1.63605	6.24	2.0672	2.86364	1.39029	6	1.85164	4.43478	1.7536	6.17391	1.80031	3.76	1.76257	5.68	1.6	4.44	1.44568	5.64	1.93391	2.7	1.49443	5.4	2.319	4.27273	2.05382
424	风平浪静	Calm and tranquil	positive	6.22917	1.24182	4.27083	2.01842	4.5625	1.63611	7.33333	1.01758	6.28	1.33915	5.44	1.68523	3.95652	1.84584	7.04348	1.02151	6.17391	1.15413	3	1.53741	5.12	1.20139	7.6	0.957427	6.48	1.32665	4.64	2.13854	4.43478	1.37597	7.47826	1.20112	5.95652	1.10693	3.86957	1.84155	4.68	1.86458	7.2	0.816497	6.57143	1.55486	5.5	2.13937	4	1.67332
425	风调雨顺	The wind and rain come in their time	positive	7.38835	0.982524	5.76699	1.79435	4	2.30312	7.40426	1.03545	7.53846	1.01868	6.28846	1.69586	2.91304	1.75585	7.13043	1.05763	7.23529	0.929263	5.23529	1.75029	5.04167	2.31214	7.66667	0.963087	7.29412	1.1008	5.72549	1.81194	3.82609	2.24929	7.3913	1.15755	7.48077	0.851536	5.80769	1.79365	4.16667	2.38959	7.41667	0.928611	7.38462	1.09825	6.23077	1.77331	2.72727	1.73729
426	风土民情	Customs	neutral	5.71287	0.973002	4.93069	1.28263	3.83333	1.54828	7.20833	1.14777	5.42553	0.616606	5.06383	0.704157	3.30435	1.57926	6.95652	1.02151	5.96296	1.14863	4.81481	1.62613	4.32	1.37598	7.44	1.22746	5.68627	1.00976	4.92157	1.19738	3.78261	1.85758	7.43478	1.23679	5.74	0.943506	4.94	1.37633	3.88	1.23558	7	1.04083	5.41667	0.583592	5.125	0.679674	3	1.73205
427	蜂拥而起	Rise up	neutral	4.53333	1.32459	5.93333	1.13618	4.10204	1.79403	7.10204	1.31093	4.59091	1.09801	5.59091	0.908116	4.28	2.0108	6.76	1.45144	4.47826	1.53355	6.26087	1.25109	3.91667	1.55806	7.45833	1.06237	4.34783	1.26522	5.95652	0.928256	4.24	1.94251	7.16	1.46287	4.72727	1.38639	5.90909	1.34196	3.95833	1.65448	7.04167	1.16018	4.41667	1.1645	5.83333	0.937437	4	2.27303
428	逢山开路	When (they) come to hill, (they) cut a road.	positive	6.17021	0.962767	5.93617	1.60711	5.57143	2.21736	6.71429	1.62019	6.26087	0.915393	6.26087	1.76371	4.75	2.2506	6.625	1.49819	6.08333	1.01795	5.625	1.40844	6.36	1.91224	6.8	1.75594	6.13636	0.990212	5.81818	1.59273	5.56	2.2	6.32	1.8868	6.2	0.957427	6.04	1.6452	5.58333	2.28257	7.125	1.191	6.4	0.966092	5.9	2.02485	4.53846	2.40192
429	奉天承运	According to god's instructions	neutral	5.7234	1.22833	5.48936	1.66645	2.97917	1.83917	6.875	1.60617	5.54167	0.832971	4.95833	1.57367	2.91667	1.76725	6.20833	1.74404	5.91304	1.53484	6.04348	1.60902	3.04167	1.94443	7.54167	1.14129	5.72	0.936305	5.4	1.55456	2.875	1.89536	6.375	1.92946	5.72727	1.51757	5.59091	1.81683	3.08333	1.81579	7.375	1.0135	5.57143	0.755929	5	1.88108	2.75	1.95982
430	佛门子弟	Son of buddha	neutral	5.20455	0.593748	4.31818	1.66737	4.28571	1.63299	6.5102	1.67235	5.17391	0.716822	5.26087	0.6887	3.875	1.62354	6.54167	1.21509	5.2381	0.436436	3.28571	1.82052	4.68	1.57374	6.48	2.04369	5.13636	0.710161	4.13636	1.93453	4.29167	1.75646	6.83333	1.52277	5.27273	0.455842	4.5	1.37148	4.28	1.54164	6.2	1.77951	5.18182	0.98165	5.54545	0.8202	3.83333	1.80067
431	夫贵妻荣	A woman of low birth may marry into the purple	positive	6.29787	1.70568	5.3617	1.8109	5.125	1.85226	6.89583	1.7165	6.2	2.14087	5.48	2.0025	5.04	1.83666	6.8	1.65831	6.40909	1.05375	5.22727	1.60154	5.21739	1.90589	7	1.80907	6.3913	1.69864	5.47826	1.80579	4.83333	1.99274	6.91667	1.76725	6.20833	1.74404	5.25	1.84744	5.41667	1.69184	6.875	1.70198	6.23077	2.12736	5.61538	2.02231	4.76923	2.24179
432	夫荣妻贵	A woman of low birth may marry into the purple	positive	6.46667	1.07872	6.2	1.27208	5.10204	1.69859	6.67347	1.59932	6.22727	0.751622	5.95455	1.29016	4.95833	1.73153	6.91667	1.10007	6.69565	1.29456	6.43478	1.23679	5.24	1.69017	6.44	1.95959	6.26087	0.864312	6.13043	1.14035	5.08696	1.75585	6.65217	1.5553	6.68182	1.24924	6.27273	1.42032	5.11538	1.68112	6.69231	1.66779	6	0.852803	5.83333	1.11464	5.45455	2.0181
433	扶贫帮困	Helping the poor	positive	6.91346	1.0438	6.07692	1.51813	5.54902	2.08148	7.58824	0.875819	6.92308	1.13494	6.07692	1.47988	5.07143	2.05352	7.46429	0.999338	6.90385	0.955061	6.07692	1.56989	6.13043	2.00691	7.73913	0.6887	6.94231	1.10991	6.11538	1.39542	5.44	2.21886	7.6	0.912871	6.88462	0.983269	6.03846	1.6445	5.65385	1.97873	7.57692	0.856648	6.80769	1.16685	6.26923	1.37281	5.14286	2.28228
434	扶优限劣	Support successful enterprises and restrict unsuccessful ones	neutral	5.6	1.7761	5.51111	1.48664	5.5625	1.85548	6.14583	2.22165	6.13636	1.69861	5.77273	1.79767	5.625	1.86063	6.04167	1.80529	5.08696	1.72977	5.26087	1.09617	5.5	1.88818	6.25	2.60851	5.33333	2.05715	5.75	1.67462	5.3913	1.87663	6.3913	1.87663	5.90476	1.37495	5.2381	1.22085	5.72	1.86011	5.92	2.51529	5.69231	2.05688	5.84615	2.0755	5.36364	2.06265
435	浮浮沉沉	Floating ups and downs	neutral	4.22917	0.880995	5.10417	1.32472	4.04348	1.45993	6.76087	1.21445	4.24	0.969536	5.28	1.02144	4.09091	1.65929	6.45455	0.911685	4.21739	0.795243	4.91304	1.59297	4	1.28537	7.04167	1.39811	4	0.816497	5.36	1.28712	3.95652	1.58051	6.43478	1.40861	4.47826	0.897956	4.82609	1.33662	4.13043	1.35862	7.08696	0.900154	3.84615	0.987096	5.69231	0.947331	3.81818	1.77866
436	福如东海	Fortune as boundless as the east sea	positive	7	1.22039	5.89583	1.80118	4.33333	2.05589	7.41176	1.29887	7.04	1.30639	6.44	1.68523	3.55556	1.84669	7.14815	1.51159	6.95652	1.14726	5.30435	1.7693	5.20833	1.95558	7.70833	0.954585	7	1.28537	6.04167	1.80529	4.19231	1.93947	7.15385	1.61722	7	1.17954	5.75	1.82376	4.48	2.20076	7.68	0.802081	6.84615	1.57301	7.07692	1.03775	3.92857	2.12908
437	福星高照	Have one's star in the ascendant	positive	7.31776	1.05149	6.49533	1.75571	4.52	2.00245	6.84	1.7884	7.32075	1.15648	6.64151	1.90237	4.12	1.9218	6.76	1.94251	7.31481	0.948168	6.35185	1.60374	4.92	2.03961	6.92	1.6563	7.5	1.07558	6.53846	1.83069	4.68	2.34023	7	2.12132	7.14545	1.00771	6.45455	1.69769	4.36	1.62993	6.68	1.40594	7.72	1.1	6.6	2.23607	3.76923	2.42053
438	福至心灵	When good luck come, one has good ideas	positive	6.75	0.978492	5.39583	2.00785	4.84615	1.5766	5.63462	2.08664	6.66667	1.00722	5.95833	1.98865	4.81481	1.54514	6.11111	1.62512	6.83333	0.963087	4.83333	1.90347	4.88	1.64114	5.12	2.42074	6.86957	1.01374	5.52174	1.85545	4.80769	1.54969	5.96154	2.0294	6.64	0.95219	5.28	2.17025	4.88462	1.63284	5.30769	2.13109	6.81818	0.873863	5.54545	2.25227	4.35714	1.54955
439	俯仰之间	In the twinling of an eye	neutral	5.26667	0.83666	4.75556	1.35102	5.12766	1.3771	6.40426	1.75276	5.27273	0.550482	4.68182	0.893701	5.34783	0.647281	5.82609	1.23038	5.26087	1.05388	4.82609	1.69631	4.91667	1.81579	6.95833	2.01039	5.28	0.791623	4.44	1.55671	5.26087	0.915393	5.91304	1.99802	5.25	0.910465	5.15	0.933302	5	1.71945	6.875	1.36135	5.38462	0.650444	4.46154	1.1266	5.18182	0.40452
440	父母之邦	The motherland	neutral	5.70213	1.0197	5.02128	1.79963	3.95745	1.75645	5.7234	2.01842	5.66667	1.20386	5.20833	1.53167	3.69565	1.69048	6.30435	1.4596	5.73913	0.810016	4.82609	2.05939	4.20833	1.81729	5.16667	2.33437	5.8	1.1547	5.12	2.00666	4.18182	1.76302	6.09091	1.87487	5.59091	0.854071	4.90909	1.57084	3.76	1.76257	5.4	2.12132	6	1.47196	5.23077	1.92154	3.36364	1.5667
441	负债累累	Be heavily in debt	negative	2.32558	1.10671	6.55814	1.74986	3.18367	1.71602	7.38776	0.931315	2.21053	1.08418	6.94737	1.22355	3.61538	1.83471	7.23077	0.862911	2.41667	1.1389	6.25	2.04833	2.69565	1.4596	7.56522	0.992063	2.18182	1.13961	6.54545	2.04071	3.45833	1.8877	7.58333	1.01795	2.47619	1.07792	6.57143	1.43427	2.92	1.52534	7.2	0.816497	1.5	0.527046	7.4	1.07497	4.07692	2.28989
442	复仇主义	Vengeance	negative	3.1028	1.29538	6.13084	1.39463	4.20408	1.71973	6.18367	1.81054	3.12963	1.4672	6.09259	1.48284	4.375	1.52693	6.29167	1.16018	3.07547	1.10678	6.16981	1.31172	4.04	1.90351	6.08	2.28983	2.94643	1.28516	6.375	1.38252	4	1.64184	6.25	1.87083	3.27451	1.29736	5.86275	1.37142	4.4	1.80278	6.12	1.78699	3.03448	1.47558	6.41379	1.40197	4	1.4771
443	富可敌国	Extremely wealthy	positive	6.56863	1.65613	6.73529	1.2737	4.25532	2.56624	7.2766	1.36258	6.01923	1.66263	6.30769	1.19703	3.54545	2.26205	6.81818	1.50036	7.14	1.457	7.18	1.20695	4.88	2.69753	7.68	1.10755	7.01923	1.30595	6.86538	1.23715	4.56522	2.64276	7.13043	1.68696	6.1	1.85439	6.6	1.30931	3.95833	2.51049	7.41667	0.974308	6.59259	1.11835	6.40741	1.18514	4.09091	2.58668
444	富民强国	Rich people and powerful countries	positive	7.51887	1.24389	7.08491	1.52514	4.08511	2.5693	7.53191	1.28285	7.69811	1.23389	7.18868	1.55732	3.56522	2.35152	7.26087	1.09617	7.33962	1.23947	6.98113	1.49988	4.58333	2.71736	7.79167	1.41357	7.56604	1.24822	7.41509	1.30729	3.69565	2.49426	7.78261	1.04257	7.4717	1.24967	6.75472	1.66301	4.45833	2.63718	7.29167	1.45898	7.40741	1.3376	7.33333	1.41421	3.36364	2.41962
445	盖世无双	Unparalleled	positive	7.125	1.33089	6.625	1.5106	4.61224	2.2805	6.7551	1.84312	7	1.5	6.84	1.43411	3.96	2.0306	6.4	2	7.26087	1.13688	6.3913	1.588	5.29167	2.36789	7.125	1.62354	7.11538	1.24344	6.61538	1.49872	4.79167	2.35869	6.75	2.09035	7.13636	1.45718	6.63636	1.55978	4.44	2.23756	6.76	1.61452	7.28571	1.32599	7.28571	0.99449	4.30769	2.49615
446	肝胆照人	In an honest partnership	positive	6.78261	1.20946	6.52174	1.73512	5.93617	1.76197	7.14894	1.44431	6.95652	1.46095	6.17391	2.14587	5.54167	1.76879	7.16667	1.12932	6.6087	0.891328	6.86957	1.14035	6.34783	1.69515	7.13043	1.74002	6.56522	1.34252	6.78261	1.47576	5.83333	1.85722	7.20833	1.25036	7	1.04447	6.26087	1.95907	6.04348	1.69164	7.08696	1.64905	6.36364	1.5667	6.72727	1.73729	5.07692	1.89128
447	赶尽杀绝	Spare none	negative	2.27778	1.05289	6.81111	1.56412	3.22917	2.31774	6.89583	1.76538	1.86957	0.919701	6.86957	1.89027	4.25	2.67435	6.66667	1.83366	2.70455	1.03117	6.75	1.1726	2.20833	1.28466	7.125	1.70198	1.97727	0.906028	7.11364	1.23377	3.34783	2.46076	7.30435	1.4596	2.56522	1.12112	6.52174	1.80579	3.12	2.22336	6.52	1.96044	1.5	0.6742	7.66667	1.1547	4.45455	2.87623
448	敢字当头	Put daring above all else	neutral	5.80851	1.37743	6.44681	1.39578	5.8913	1.77924	6.73913	1.35704	6.34783	0.934622	6	1.5667	5.6087	2.03914	7	0.852803	5.29167	1.5458	6.875	1.07592	6.17391	1.46636	6.47826	1.70213	5.77273	1.41192	6.45455	1.29935	5.77273	1.84989	6.68182	0.945484	5.84	1.37477	6.44	1.50222	6	1.74456	6.79167	1.66757	6.2	0.632456	6	1.49071	5.18182	2.27236
449	敢作敢当	Have the courage to take the blame for what one does	positive	6.58696	1.14651	6.32609	1.78953	6.63043	1.4354	7.63043	0.996855	6.86957	1.05763	6.13043	1.84155	6.25	1.72576	7.41667	1.01795	6.30435	1.18455	6.52174	1.75472	7.04545	0.898532	7.86364	0.940894	6.86364	1.28343	6	2.04707	6.56522	1.44052	7.65217	1.07063	6.33333	0.963087	6.625	1.49819	6.69565	1.4596	7.6087	0.940944	7.2	0.788811	5.8	2.04396	6.16667	1.6967
450	敢作敢为	Courageous	positive	6.67961	1.08658	6.62136	1.24551	6.32692	2.04576	7.78846	1.05415	6.66667	1.25963	6.78431	1.23796	5.75	2.47394	7.78571	1.03126	6.69231	0.897457	6.46154	1.24399	7	1.10335	7.79167	1.10253	6.79245	1.19869	6.67925	1.28263	6.33333	2.16617	7.85185	1.09908	6.56	0.951047	6.56	1.21487	6.32	1.95192	7.72	1.02144	6.73077	1.37281	6.88462	1.27521	5.66667	2.58199
451	干柴烈火	Easy on trigger	neutral	5.125	1.85226	6.20833	1.52927	4.57143	1.82574	6.93878	1.32929	5.08	1.82392	6.32	1.51987	4.32	2.01494	6.64	1.28712	5.17391	1.92241	6.08696	1.56417	4.83333	1.60615	7.25	1.32698	4.91667	2.04124	5.95833	1.62799	4.4	1.82574	6.72	1.45831	5.33333	1.6594	6.45833	1.41357	4.75	1.84744	7.16667	1.16718	4.76923	2.04751	6.61538	1.50214	4.15385	2.1543
452	干干巴巴	Dry	negative	3.6875	1.03464	4.61458	1.43749	4.62	1.2599	6.64	1.5748	3.56	1.15758	4.68	1.31403	4.38462	1.0612	6.65385	1.23101	3.82609	0.886883	4.54348	1.58769	4.875	1.42379	6.625	1.9068	3.75	1.15156	4.35417	1.60488	4.53846	1.17408	6.88462	1.33647	3.625	0.923721	4.875	1.22696	4.70833	1.36666	6.375	1.78916	3.30769	1.18213	4.53846	1.5064	4.5	1.01905
453	钢筋铁骨	A body strong as iron	positive	6.25962	1.19054	6.18269	1.64738	5.08511	2.21487	7.19149	1.27924	6.55769	1.19498	6.44231	1.53921	4.16667	1.99274	6.875	1.42379	5.96154	1.11955	5.92308	1.72463	6.04348	2.05555	7.52174	1.03877	6.15686	1.15538	6.27451	1.4571	4.95833	2.42234	7.125	1.59653	6.35849	1.22623	6.09434	1.8215	5.21739	2.02162	7.26087	0.864312	6.42308	1.20576	6.61538	1.26734	3.92308	2.17798
454	钢铁意志	Iron will	positive	6.52174	1.41011	6.56522	1.58678	5.93617	2.3257	7.29787	1.36597	6.68182	1.35879	6.36364	1.329	5.70833	2.34945	7.25	1.25974	6.375	1.46888	6.75	1.79976	6.17391	2.32872	7.34783	1.49571	6.34783	1.6127	6.3913	1.85225	6.71429	2.07709	7.2381	1.75798	6.69565	1.18455	6.73913	1.28691	5.30769	2.36253	7.34615	0.977438	6.54545	1.36848	6.72727	1.55505	6.45455	2.62159
455	高高矮矮	Tall and short	neutral	4.71111	0.626034	4.24444	1.58337	4.70213	1.44335	6.87234	1.34515	4.54167	0.72106	4.83333	0.963087	4.08696	1.23998	6.73913	1.17618	4.90476	0.436436	3.57143	1.88604	5.29167	1.39811	7	1.50362	4.73913	0.6887	3.95652	1.8703	4.59091	1.18157	6.68182	1.52398	4.68182	0.5679	4.54545	1.18431	4.8	1.65831	7.04	1.17189	4.5	0.797724	4.83333	1.33712	4.09091	1.13618
456	高价商品	High price goods	negative	3.89583	1.40273	5.35417	1.61758	4.10417	2.08581	7.39583	1.04657	3.72	1.59478	5.52	1.66132	3.65217	2.0804	7.04348	1.10693	4.08696	1.16436	5.17391	1.58551	4.52	2.04369	7.72	0.890693	3.96	1.3687	5.52	1.82848	4.04348	1.8703	7.04348	1.18622	3.82609	1.46636	5.17391	1.37021	4.16	2.30362	7.72	0.791623	3.61538	1.50214	5.76923	1.58923	3.54545	1.91644
457	高架道路	Viaduct	neutral	5.02273	0.505258	4.29545	1.67859	4.08163	1.56574	7.20408	1.20726	5.04348	0.638055	4.86957	0.967863	3.73077	1.84516	6.96154	1.24838	5	0.316228	3.66667	2.05751	4.47826	1.08165	7.47826	1.12288	5	0.436436	4.36364	1.64882	3.91667	1.6129	7.25	1.22474	5.04545	0.575473	4.22727	1.74388	4.24	1.53514	7.16	1.21381	5	0.426401	4.58333	1.08362	3.23077	1.64083
458	高谈阔论	Declaim	neutral	4.57447	1.79061	5.82979	1.53678	5.75	1.78051	7.25	1.06191	4.78261	1.85758	5.73913	1.65742	5.36	1.91224	7.28	0.936305	4.375	1.73988	5.91667	1.44212	6.17391	1.55657	7.21739	1.20441	4.68182	1.67293	5.54545	1.53459	5.3913	1.82755	7.43478	0.992063	4.48	1.91746	6.08	1.52534	6.08	1.70587	7.08	1.11505	4.8	1.93218	5.8	1.81353	4.66667	1.92275
459	高温作业	High temperature operation	negative	3.75728	1.29453	5.73786	1.1286	3.5102	1.5562	6.95918	1.38382	4.29412	1.00587	5.45098	0.923336	3.125	1.2959	6.75	1.2938	3.23077	1.33747	6.01923	1.24444	3.88	1.71561	7.16	1.46287	3.76923	1.35206	5.82692	1.04264	3.43478	1.44052	6.95652	1.52191	3.7451	1.24649	5.64706	1.21365	3.57692	1.67745	6.96154	1.28002	4.42308	0.945434	5.38462	0.637302	3.27273	1.55505
460	高中会考	High school examinations	neutral	5.0404	0.768237	5.14141	1.35534	4.08	2.39762	7.4	1.27775	5.08333	0.453513	5.02083	0.729021	3.08	1.55242	6.92	1.38203	5	0.979796	5.2549	1.7532	5.08	2.69134	7.88	0.971253	4.84	0.680936	5.06	1.28428	4.25	2.59179	7.08333	1.47196	5.2449	0.804431	5.22449	1.43273	3.92308	2.24362	7.69231	1.01071	5	0.288675	5.12	0.525991	2.91667	1.67649
461	搞小动作	Engage in little tricks	negative	3	0.988826	5.78261	1.76274	5	1.913	7.3125	1.03464	2.86957	0.919701	5.26087	1.76371	5.07407	1.66239	6.88889	0.9337	3.13043	1.05763	6.30435	1.63581	4.90476	2.23394	7.85714	0.910259	2.90909	1.1916	5.90909	1.87487	4.69565	1.84477	7.21739	1.1264	3.08333	0.775532	5.66667	1.6854	5.28	1.96893	7.4	0.957427	2.5	0.971825	5.4	1.95505	4.69231	1.54837
462	疙疙瘩瘩	Rough	negative	3.51064	1.21355	5.3617	1.55235	4.54	1.32803	6.84	1.5954	3.6087	1.03305	4.91304	1.37883	4.56	1.50222	6.76	1.09087	3.41667	1.38051	5.79167	1.61458	4.52	1.15902	6.92	1.99833	3.52174	1.20112	5.52174	1.53355	4.58333	1.21285	6.70833	1.65448	3.5	1.25109	5.20833	1.58743	4.5	1.44914	6.96154	1.56156	3.54545	1.21356	5.18182	1.32802	4.16667	1.58592
463	咯吱咯吱	Creak	neutral	4.1087	1.01605	4.8913	1.30347	4.7451	1.35415	6.80392	1.5623	4.08333	0.974308	4.70833	1.33447	4.62963	1.07946	6.55556	1.28103	4.13636	1.08213	5.09091	1.26901	4.875	1.62354	7.08333	1.81579	4.17391	1.23038	4.52174	1.50362	5.24	0.723418	6.44	1.80462	4.04348	0.76742	5.26087	0.963771	4.26923	1.63848	7.15385	1.22286	3.92308	1.18754	4.38462	1.66024	5.21429	0.801784
464	革命故事	Revolutionary story	neutral	5.78302	1.05112	5.61321	1.73244	4.27083	1.6978	7.1875	1.17882	6.05556	1.10602	5.94444	1.26516	4.04167	1.65448	6.91667	1.41165	5.5	0.918225	5.26923	2.06858	4.5	1.74456	7.45833	0.832971	5.67925	0.893859	5.64151	1.74416	4.25	1.84744	7.08333	1.47196	5.88679	1.18744	5.58491	1.73686	4.29167	1.57367	7.29167	0.80645	5.88889	0.974022	6.14815	0.988538	3.91667	1.72986
465	格杀不论	Regardless of killing	negative	3.08511	1.50116	6.70213	1.39743	3.375	2.33953	6.8125	1.80609	2.91667	1.66594	6.54167	1.35066	3.65217	2.55145	6.82609	1.80031	3.26087	1.32175	6.86957	1.45553	3.12	2.14709	6.8	1.84842	3	1.47196	6.8	1.35401	3.21739	2.25543	6.82609	1.96913	3.18182	1.56255	6.59091	1.46902	3.52	2.45153	6.8	1.68325	2.61538	1.60927	6.69231	1.4367	3.72727	2.72363
466	隔离审查	Put sb. in isolation and under investigation	negative	3.41304	1.25744	6.08696	1.6442	2.95745	1.75645	7.06383	1.27525	2.95652	1.29609	5.86957	2.07374	3.58333	2.10417	6.91667	1.1389	3.86957	1.05763	6.30435	1.06322	2.30435	0.97397	7.21739	1.41282	3.36364	1.52894	6.36364	1.7333	2.59091	1.29685	7.04545	1.4953	3.45833	0.977093	5.83333	1.55106	3.28	2.05183	7.08	1.07703	2.4	1.3499	6.5	2.27303	2.54545	1.63485
467	各行其是	Each does what is right in his own eyes	neutral	4.625	1.44884	4.92045	1.42411	5.17391	1.76766	7	1.29957	4.28889	1.29021	5.17778	0.805912	5	1.62369	6.95652	0.76742	4.97674	1.53512	4.65116	1.83723	5.34783	1.92138	7.04348	1.69164	4.825	1.50021	4.75	1.56484	5.65217	1.36877	6.52174	1.56291	4.45833	1.39845	5.0625	1.29494	4.69565	2.00986	7.47826	0.730477	4.22727	1.19251	5.13636	0.888844	5.25	1.3568
468	各尽其责	Take its own responsibility	positive	6.43478	1.04673	5.30435	1.76219	6.33333	2.00354	7.54167	0.92157	6.36364	0.953463	5.77273	1.47783	6.08333	2.10417	7.375	0.923721	6.5	1.14208	4.875	1.91816	6.58333	1.90917	7.70833	0.907896	6.41667	1.17646	5.41667	1.86307	6.56522	2.10683	7.69565	1.01957	6.45455	0.911685	5.18182	1.68003	6.12	1.9218	7.4	0.816497	6.25	1.13818	6	1.41421	6.27273	2.57258
469	各尽其职	Fulfill their own duties	positive	6.02128	1.09325	4.95745	1.79319	6.14894	1.82945	7.57447	0.994434	5.95652	1.06508	5	1.97714	6.26087	1.54383	7.30435	0.926125	6.08333	1.1389	4.91667	1.63964	6.04167	2.09511	7.83333	1.00722	5.95652	1.10693	4.56522	1.94997	6.68182	1.55491	7.5	1.05785	6.08333	1.10007	5.33333	1.57885	5.68	1.95192	7.64	0.95219	5.72727	0.904534	4.72727	2.3277	6.36364	2.01359
470	各尽所能	Let each person do his best	positive	6.08696	0.962083	5.45652	1.60148	6.15556	1.7832	7.31111	1.10417	6	0.872872	5.31818	1.35879	5.5	2.15473	7.27273	0.882735	6.16667	1.0495	5.58333	1.81579	6.78261	1.04257	7.34783	1.30065	6.14286	1.19523	5.33333	1.87972	6.09524	1.41084	7.38095	1.07127	6.04	0.734847	5.56	1.35647	6.20833	2.08471	7.25	1.15156	6	0.866025	5.55556	1.424	5.4	1.77639
471	各显其能	Each shows its ability	positive	6.2449	1.19949	5.79592	1.54083	6.06122	1.6883	7.26531	1.07578	6.08	1.35154	6.04	1.59374	5.45833	1.74404	7.04167	0.907896	6.41667	1.01795	5.54167	1.47381	6.64	1.43991	7.48	1.19443	6.26923	1.15092	5.57692	1.44701	6.43478	1.5023	7.56522	1.23679	6.21739	1.27766	6.04348	1.63702	5.73077	1.80128	7	0.848528	6	1.24035	5.71429	1.63747	5.90909	1.51357
472	各有所好	Everyone has his hobby	neutral	5.42157	0.872419	5	1.13452	5.61224	1.77736	7.22449	1.17731	5.43396	0.950899	5.24528	1.0544	5.2	1.63299	7	1.08012	5.40816	0.788415	4.73469	1.16861	6.04167	1.85283	7.45833	1.25036	5.40385	0.822708	4.80769	1.10327	5.52	1.93907	7.12	1.39403	5.44	0.92934	5.2	1.14286	5.70833	1.62799	7.33333	0.916831	5.40741	0.747265	4.88889	1.01274	5.15385	1.77229
473	根深叶茂	Thick with leaves and deep-rooted	positive	6.31915	1.23546	5.23404	1.89063	4.72	1.69079	7.26	1.0844	6.16667	1.40393	5.54167	1.91059	4.28	1.92614	7.12	1.05357	6.47826	1.03877	4.91304	1.85651	5.16	1.31276	7.4	1.11803	6.25	1.39096	5.125	2.04966	4.44	1.50222	7.32	1.1804	6.3913	1.07615	5.34783	1.74795	5	1.84842	7.2	1	5.75	1.54479	5.25	2.00567	4.23077	1.92154
474	亘古未有	Unprecedented	neutral	5.6	0.939052	5.86667	1.67332	4.21154	1.56351	5.78846	2.1451	5.47826	0.947224	5.65217	1.46501	4.37037	1.62073	5.18519	2.14901	5.72727	0.935125	6.09091	1.87487	4.04	1.51327	6.44	1.98074	5.59091	1.09801	5.77273	1.74388	4.61538	1.26734	5.57692	2.24808	5.6087	0.782718	5.95652	1.63702	3.80769	1.744	6	2.05913	5.09091	0.831209	5.45455	1.4397	4.71429	1.13873
475	耿耿于心	Brood on	negative	3.81818	1.24401	5.86364	0.878448	5.02041	1.76174	7.12245	1.01309	3.95238	0.973457	5.61905	0.740013	5.54167	1.41357	6.95833	0.80645	3.69565	1.4596	6.08696	0.949308	4.52	1.93907	7.28	1.17331	3.52174	1.23838	5.82609	0.984063	4.875	1.84891	7.25	1.15156	4.14286	1.19523	5.90476	0.768424	5.16	1.7	7	0.866025	4.16667	1.02986	5.5	0.904534	5.5	1.73205
476	哽哽咽咽	Choking with tears	negative	3.5625	1.36688	5.3125	1.70302	4.94231	1.67348	7.21154	1.07259	3.66667	1.52277	5.41667	1.63964	4.96296	1.65207	7	1.14354	3.45833	1.21509	5.20833	1.7932	4.92	1.73013	7.44	0.960902	3.16667	1.27404	5.66667	1.99274	4.53846	1.55514	7.26923	1.11562	3.95833	1.36666	4.95833	1.30148	5.34615	1.71912	7.15385	1.04661	2.83333	1.11464	5.75	2.0505	4.64286	1.82323
477	更名改姓	Change one's whole name	neutral	4.14894	1.23321	4.97872	1.66145	5.54167	1.92363	6.6875	1.53202	4.17391	1.40299	5.08696	1.34547	5.20833	1.99955	6.875	1.07592	4.125	1.07592	4.875	1.9407	5.875	1.82525	6.5	1.88818	4.29167	1.23285	4.58333	1.69184	5.56522	1.87873	6.95652	1.22394	4	1.24316	5.3913	1.55911	5.52	2.0025	6.44	1.75784	4.66667	1.37069	4.33333	1.1547	4.91667	1.97523
478	工农差别	Differences between workers and peasants	neutral	4.37	1.08855	5.32	1.15365	3.76	1.57221	5.96	2.33832	4.85106	0.359875	5.04255	0.464264	3.48	1.55778	6.96	1.33791	3.9434	1.32164	5.56604	1.48725	4.04	1.56738	4.96	2.7	4.40816	1.17115	5.30612	1.27809	3.79167	1.444	6.04167	2.36789	4.33333	1.01325	5.33333	1.0328	3.73077	1.71015	5.88462	2.35503	4.90909	0.294245	5.04545	0.37509	3.08333	1.62135
479	工艺品厂	Handicraft factory	neutral	5.20455	0.593748	4.13636	1.60799	4.54902	1.36108	6.84314	1.44738	5.13636	0.35125	4.95455	0.72225	4.19231	1.54969	6.61538	1.41639	5.27273	0.767297	3.31818	1.83579	4.92	1.03763	7.08	1.46969	5.2381	0.768424	4.19048	1.86062	4.56	1.41657	6.72	1.51438	5.17391	0.387553	4.08696	1.37883	4.53846	1.33359	6.96154	1.39945	5	0	5	0.942809	4.07692	1.60528
480	工作手册	Manual	neutral	5.02326	0.266223	4.09302	1.58586	4.79592	2.12112	7.71429	0.889757	5.05	0.223607	5	0	4.79167	1.8877	7.45833	0.977093	5	0.301511	3.30435	1.84477	4.8	2.36291	7.96	0.734847	5.04348	0.366589	4	1.59545	5	2.08167	7.8	0.912871	5	0	4.2	1.60918	4.58333	2.18526	7.625	0.875388	5.09091	0.301511	5	0	4.69231	1.93152
481	公报私仇	Use one's position to get even with another person for a private grudge	negative	2.08889	1.10417	7.13333	1.57538	4.7551	2.08697	7.06122	1.42021	2.18182	1.25874	6.86364	1.90976	4.91667	2.18526	6.75	1.2938	2	0.953463	7.3913	1.15755	4.6	2.02073	7.36	1.49666	2	1.24316	7.30435	1.57926	4.625	2.26144	7.41667	1.05981	2.18182	0.957992	6.95455	1.58797	4.88	1.94336	6.72	1.64621	2.08333	1.37895	7.08333	1.92865	4.25	2.49089
482	公费旅游	Junket	neutral	4.25962	2.41353	6.48077	1.58256	5.125	1.9529	6.9375	1.46456	3.39216	2.13615	6.35294	1.58523	5	1.95789	6.8	1.29099	5.09434	2.38798	6.60377	1.58526	5.26087	1.98213	7.08696	1.64905	4.76471	2.60452	6.39216	1.61342	5.125	1.77697	6.95833	1.36666	3.77358	2.12713	6.56604	1.5629	5.125	2.15311	6.91667	1.58572	3.68	2.57747	6.44	1.41657	4.69231	1.70219
483	公关广告	Pr (public relation) advertising	neutral	4.81443	0.650799	4.52577	1.31571	4.57143	1.71998	6.97959	1.28273	5	0.213201	4.93333	0.252262	4.28	1.51438	6.96	1.3687	4.65385	0.837471	4.17308	1.71179	4.875	1.89536	7	1.21584	4.73469	0.531331	4.34694	1.2674	4.44	2.00167	6.88	1.33292	4.89583	0.750591	4.70833	1.35204	4.70833	1.39811	7.08333	1.24819	5	0	4.86957	0.34435	4	1.91485
484	公关先生	Pr man	neutral	4.84091	0.568277	4.47727	1.35524	4.55102	1.27576	5.91837	2.06999	4.95455	0.575473	4.86364	1.16682	4.79167	1.02062	6.54167	1.02062	4.72727	0.550482	4.09091	1.4445	4.32	1.46401	5.32	2.6096	4.78261	0.518435	4.30435	1.57926	4.78261	1.16605	5.82609	2.22899	4.90476	0.624881	4.66667	1.06458	4.34615	1.35476	6	1.95959	5	0	4.63636	1.5667	5	0.447214
485	公款旅游	Sightseeing at public expenses	negative	3.0297	1.97715	6.54455	1.559	5.52941	1.80392	6.92157	1.24649	2.12	1.23949	6.5	1.79853	5.96154	1.75455	6.80769	1.16685	3.92157	2.16188	6.58824	1.29887	5.08	1.77764	7.04	1.33791	3.4	2.14761	6.22	1.85483	5.28	1.56844	7.12	1.05357	2.66667	1.73973	6.86275	1.13172	5.76923	2.00614	6.73077	1.40165	2.4	1.47196	6	2.19848	5.92308	1.49786
486	功成名就	Achieve success and win recognition	positive	7.21277	1.17836	6.93617	1.93822	5.97959	1.88735	7.28571	1.11803	7.21739	1.31275	6.21739	2.41127	5.07692	1.91673	7.07692	0.89098	7.20833	1.06237	7.625	0.969648	7	1.24316	7.52174	1.30974	7.21739	1.16605	7.04348	1.7183	5.92	1.91311	7.24	1.09087	7.20833	1.21509	6.83333	2.16025	6.04167	1.89918	7.33333	1.16718	7.09091	1.13618	6.54545	2.11488	5.23077	2.0064
487	攻心为上	Psychological offense is the best of tactics	neutral	5.20833	1.35204	5.54167	1.23699	5.36735	1.98635	6.57143	1.8143	5.48	1.04563	5.76	0.925563	5.44	1.82757	6.04	2.18861	4.91304	1.59297	5.30435	1.49042	5.29167	2.17654	7.125	1.1156	5.08333	1.24819	5.5	0.978019	5.2	2.12132	6.04	2.18861	5.33333	1.46456	5.58333	1.47196	5.54167	1.86452	7.125	1.1156	5.30769	1.03155	5.46154	0.967418	5.38462	2.14237
488	恭而敬之	Respectful	positive	6.10417	1.47662	5.47917	1.66298	5.34694	1.88802	7.02041	1.18127	6.41667	1.28255	5.29167	1.80529	5.58333	2.08341	7	0.884652	5.79167	1.61458	5.66667	1.52277	5.12	1.69115	7.04	1.42829	6.36	1.22066	5.28	1.81475	5.47826	2.06419	6.91304	1.44326	5.82609	1.69631	5.69565	1.49042	5.23077	1.7506	7.11538	0.90893	6.38462	1.1209	5	1.87083	5.45455	2.62159
489	勾股定理	Pythagorean theorem	neutral	4.90909	1.0744	4.75	1.33164	4.55102	2.31895	7.34694	1.72664	5	0	4.71429	0.902378	3.6	1.87083	6.6	1.93649	4.82609	1.49703	4.78261	1.65025	5.54167	2.35869	8.125	1.03472	4.84	1.43411	4.76	1.42244	4.48	2.32952	6.8	2	5	0	4.73684	1.24017	4.625	2.35561	7.91667	1.17646	5	0	4.53846	1.1266	3.30769	1.93152
490	沟沟岔岔	Ditch and gully	negative	4	1.02151	4.82979	1.29076	3.96	1.38446	6.14	2.0001	3.95833	1.08264	4.70833	1.23285	3.88	1.50886	6.4	1.52753	4.04348	0.975997	4.95652	1.36443	4.04	1.2741	5.88	2.38607	3.79167	1.10253	4.91667	1.5299	4.08333	1.41165	5.95833	2.17654	4.21739	0.902347	4.73913	1.00983	3.84615	1.37673	6.30769	1.84974	4	1.12815	4.66667	1.49747	3.66667	1.49747
491	狗拿耗子	Dogs going ratting	negative	3.1619	1.04811	6.08571	1.05716	4.9	1.71726	7.1	1.24949	3.18519	1.19865	5.90741	1.06874	4.64	1.55134	6.8	1.1547	3.13725	0.87223	6.27451	1.02134	5.16	1.86369	7.4	1.29099	3.14815	1.13947	5.98148	0.941511	4.84	1.72434	7.48	1.00499	3.17647	0.953014	6.19608	1.16653	4.96	1.74356	6.72	1.36991	3.06897	1.22273	5.96552	0.981353	4.69231	1.75046
492	狗屁不通	The article is not smooth; unreasonable	negative	2.65957	1.16613	6.48936	1.62684	4.63265	1.5771	6.95918	1.24095	2.78261	1.24157	6	1.80907	4.48	1.29486	6.64	1.38082	2.54167	1.10253	6.95833	1.30148	4.79167	1.84106	7.29167	0.999094	2.45455	1.1434	6.72727	1.72328	4.29167	1.42887	6.875	1.48361	2.84	1.17898	6.28	1.54164	4.96	1.67033	7.04	0.978093	2.6	1.26491	6	2.10819	4.25	1.54479
493	狗血淋头	Be cursed by	negative	2.48889	1.16037	6.77778	1.78235	3.80851	1.36156	6.76596	1.60451	2.27273	1.03196	6.59091	2.0853	4.04	1.56738	6.36	1.72916	2.69565	1.25896	6.95652	1.46095	3.54545	1.05683	7.22727	1.34277	2.13636	0.888844	6.95455	1.939	3.77273	1.10978	6.72727	1.7507	2.82609	1.30217	6.6087	1.64425	3.84	1.57268	6.8	1.5	1.90909	0.831209	6.81818	2.35874	3.91667	1.37895
494	狗仗人势	Like a dog threatening people on the strength of its master’s power	negative	2.44	1.13101	6.78	1.25995	4.27083	2.01842	7.125	1.12278	2.38	1.14089	6.6	1.45686	4.75	1.87083	6.66667	1.00722	2.5	1.12938	6.96	1.00934	3.79167	2.08471	7.58333	1.05981	2.22449	0.963183	6.89796	1.141	4.04348	2.01084	7.30435	1.18455	2.64706	1.24617	6.66667	1.36626	4.48	2.04369	6.96	1.05987	2.13043	1.14035	6.69565	1.29456	4.45455	2.16165
495	孤魂野鬼	Ghost; wandering souls	negative	2.77083	1.13437	6.33333	1.35793	3.9375	1.77939	6.39583	1.87639	2.64	1.25433	6.12	1.33292	4.4	2.06155	5.68	2.13542	2.91304	0.99604	6.56522	1.37597	3.43478	1.27301	7.17391	1.15413	2.5	1.21584	6.66667	0.963087	3.6087	1.82755	6.30435	2.05459	3.04167	0.999094	6	1.61515	4.24	1.71464	6.48	1.73494	2.23077	1.23517	6.61538	1.1209	3.84615	2.11527
496	孤苦伶仃	Lonely and helpless	negative	2.93137	1.01727	5.92157	1.34743	3.52083	1.57087	7.02083	1.15758	2.86792	1.00073	5.83019	1.46413	3.54167	1.38247	6.875	0.946963	3	1.04083	6.02041	1.21604	3.5	1.7693	7.16667	1.34056	2.74	1.06541	5.96	1.33951	3.26087	1.45282	7.13043	1.39167	3.11538	0.942542	5.88462	1.36703	3.76	1.66533	6.92	0.909212	2.7037	1.06752	5.81481	1.49453	3.27273	1.55505
497	孤苦零丁	Lonely and helpless	negative	2.93478	1.04141	6.02174	1.55619	3.375	1.33089	7.0625	1.47902	3.04545	1.0901	5.68182	1.42716	3.5	1.31876	6.875	1.48361	2.83333	1.00722	6.33333	1.63299	3.25	1.35935	7.25	1.48177	2.91667	1.1389	5.875	1.70198	3.5	1.56038	7.04167	1.70623	2.95455	0.950051	6.18182	1.40192	3.25	1.07339	7.08333	1.24819	2.83333	1.33712	5.58333	1.62135	3.5	1.5667
498	孤苦无告	Orphaned and helpless	negative	3.23404	1.10754	6.10638	1.12741	3.58333	1.52753	5.75	2.14873	3.16	1.1431	6.24	1.23423	3.5	1.53226	5.58333	2.06243	3.31818	1.08612	5.95455	0.998917	3.66667	1.55106	5.91667	2.26345	3	1.21584	6.20833	1.25036	3.69565	1.4596	6	2.08893	3.47826	0.947224	6	1	3.48	1.61038	5.52	2.21961	2.84615	1.28103	6.76923	1.09193	3.91667	1.72986
499	姑妄言之	Just talk for the sake of talking	neutral	4.08333	1.25195	5.29167	1.50118	5.06	1.40567	5.06	2.37684	4	1.17954	5.29167	1.19707	4.8	1.38444	4.96	2.24499	4.16667	1.34056	5.29167	1.78104	5.32	1.40594	5.16	2.54427	4	1.3484	5.34783	1.5553	4.84	1.51877	4.48	2.46847	4.16	1.17898	5.24	1.47986	5.28	1.27541	5.64	2.17715	4.09091	1.30035	5.36364	1.12006	4.61538	1.85016
500	古典音乐	Classical music	positive	6.58333	1.30194	4.83333	2.22494	5.08	2.12699	7.3	1.23305	6.68	1.31403	5.44	2.45085	3.96154	1.70835	6.92308	1.19743	6.47826	1.30974	4.17391	1.77488	6.29167	1.87615	7.70833	1.16018	6.875	1.191	5.20833	2.24537	5.04167	2.07426	7.375	1.34528	6.29167	1.36666	4.45833	2.1865	5.11538	2.21498	7.23077	1.1422	6.76923	1.36344	5.46154	2.72688	3.76923	1.42325
501	骨肉相残	Fratricidal fighting	negative	2.10417	1.20706	7.08333	1.91115	4.17021	2.07803	7.14894	1.17914	2.20833	1.41357	6.54167	2.37705	3.78261	1.92959	6.82609	1.11405	2	0.978019	7.625	1.09594	4.54167	2.1865	7.45833	1.17877	2.04348	1.39734	7.47826	1.56291	3.65217	1.94489	7.08696	1.16436	2.16	1.02794	6.72	2.15097	4.66667	2.11961	7.20833	1.21509	2.09091	1.70027	7.09091	1.8684	3.09091	1.97254
502	骨肉相连	Near to each other as bone and flesh	positive	6.2766	1.1364	6.25532	1.55295	4.07692	2.14975	7.34615	1.16963	6.34783	1.11227	5.78261	1.62247	3.7037	1.70553	7.14815	1.19948	6.20833	1.17877	6.70833	1.36666	4.48	2.5186	7.56	1.12101	6.31818	1.12911	6.09091	1.54023	4.07692	2.09615	7.26923	1.37281	6.24	1.16476	6.4	1.58114	4.07692	2.24362	7.42308	0.945434	6.5	0.707107	5.7	1.70294	4.14286	1.87523
503	骨肉至亲	Blood relationships	positive	6.76596	1.38647	6.59574	1.75276	4.28	2.16691	7.84	0.976458	6.73913	1.28691	5.86957	1.91417	4.08	2.30796	7.88	0.927362	6.79167	1.50302	7.29167	1.26763	4.48	2.04369	7.8	1.04083	6.72727	1.45346	6.13636	1.88466	4.4	2.14087	7.96	0.888819	6.8	1.35401	7	1.55456	4.16	2.2301	7.72	1.06145	6.9	1.19722	5.2	2.20101	4.07692	2.13937
504	骨软筋酥	Feel very tired	neutral	4.54348	1.54498	5.5	1.27802	3.84615	1.37747	6.38462	1.52308	4.28	1.36991	5.16	1.34412	3.96296	1.34397	6.18519	1.03912	4.85714	1.71131	5.90476	1.09109	3.72	1.42945	6.6	1.91485	4.6087	1.75134	5.6087	1.46905	4.03846	1.50946	6.11538	1.60815	4.47826	1.344	5.3913	1.07615	3.65385	1.23101	6.65385	1.41258	4	1.51911	5.21429	1.42389	3.92857	1.43925
505	骨头架子	Bone shelf	neutral	4.44444	1.17851	4.93333	1.23215	4.33333	1.58897	6.75	1.86228	4.52381	1.16701	5.14286	0.573212	3.84	1.74833	6.56	1.91659	4.375	1.20911	4.75	1.59483	4.86957	1.21746	6.95652	1.82105	4.82609	0.936734	4.82609	1.43502	4.34783	1.77377	6.78261	2.02162	4.04545	1.29016	5.04545	0.998917	4.32	1.43527	6.72	1.74452	5	0.447214	5.18182	0.750757	3.53846	1.94145
506	故技重演	Be up to one's old tricks	negative	3.40952	1.07144	5.86667	1.23309	5.40426	1.61056	7.2766	1.05711	3.62264	1.09591	5.69811	1.29474	5	1.4771	6.91304	0.900154	3.19231	1.0105	6.03846	1.15405	5.79167	1.66757	7.625	1.09594	3.28302	1.09855	5.79245	1.40546	5.21739	1.53613	7.30435	1.29456	3.53846	1.03775	5.94231	1.03684	5.58333	1.69184	7.25	0.793999	3.34615	1.12933	5.73077	1.45761	4.72727	1.48936
507	故土难离	Homeland is hard to leave	neutral	4.78261	1.5764	6.08696	1.39565	4.3913	1.96048	7.13043	1.02434	4.81818	1.46828	5.5	1.22474	4.56522	1.92652	7.08696	0.900154	4.75	1.70038	6.625	1.34528	4.21739	2.02162	7.17391	1.15413	4.26087	1.60163	6.17391	1.30217	4.54167	2.04257	7.125	1.1156	5.30435	1.39593	6	1.50756	4.22727	1.90067	7.13636	0.940894	4.45455	1.57249	6	1.34164	4.75	2.09436
508	故作高深	Pretending to be mysterious	negative	3.29703	0.995435	5.69307	1.19785	5.36735	1.59026	7	1.13652	3.38	1.06694	5.56	1.3118	5.45833	1.50302	6.5	1.14208	3.21569	0.923336	5.82353	1.07156	5.28	1.69607	7.48	0.918332	3.21154	0.935918	5.59615	1.10719	5.56522	1.47174	7.13043	1.21746	3.38776	1.05705	5.79592	1.29067	5.19231	1.69751	6.88462	1.07059	3.30769	1.01071	5.61538	1.16883	5.54545	1.75292
509	故作镇静	To be calm	negative	3.84444	1.20521	5.33333	1.3817	5.82979	1.79757	7.3617	0.895048	3.77273	1.30683	5.09091	1.4445	5.68182	1.49241	7.04545	0.72225	3.91304	1.12464	5.56522	1.30823	5.96	2.05102	7.64	0.95219	3.70833	1.26763	5.29167	1.5458	5.90909	1.925	7.5	1.01183	4	1.14018	5.38095	1.20317	5.76	1.71464	7.24	0.778888	3.41667	1.31137	5.16667	1.74946	6.1	1.44914
510	顾名思义	As the name suggest	neutral	5.20455	0.593748	4.93182	1.08687	5.23913	1.3854	7.06522	1.42052	5.27273	0.631085	5.22727	0.685344	4.59091	1.09801	6.22727	1.26986	5.13636	0.560226	4.63636	1.329	5.83333	1.37261	7.83333	1.09014	5.13636	0.560226	4.86364	0.710161	5.2381	0.889087	7.09524	1.51343	5.27273	0.631085	5	1.38013	5.24	1.71464	7.04	1.3687	5.16667	0.57735	5.16667	0.57735	4.9	0.567646
511	拐弯抹角	Bending around	negative	3.52427	0.894917	5.57282	1.27265	4.71429	1.60728	7.16327	1.04775	3.84615	0.871884	5.21154	1.19372	4.96	1.6452	6.92	1.07703	3.19608	0.80049	5.94118	1.25558	4.45833	1.5598	7.41667	0.974308	3.42	0.672795	5.82	1.20695	4.95833	1.5458	7.20833	1.21509	3.62264	1.06023	5.33962	1.30005	4.48	1.66132	7.12	0.881287	3.6	0.57735	5.48	0.918332	5.15385	1.62512
512	怪里怪气	Bizarre	negative	2.95652	1.07407	5.56522	1.45529	5.52083	1.4585	7.04167	1.27092	3.13043	0.967863	5.34783	1.5553	5.25	1.48177	6.66667	1.27404	2.78261	1.16605	5.78261	1.34693	5.79167	1.41357	7.41667	1.17646	3.09091	1.1916	5.59091	1.50108	4.83333	1.23945	6.79167	1.61458	2.83333	0.963087	5.54167	1.444	6.20833	1.35066	7.29167	0.750604	3.1	0.994429	5.5	1.43372	4.58333	1.37895
513	怪腔怪调	Weird cavities	negative	3.13131	0.876524	6.0202	0.925597	5.375	1.70886	6.91667	1.28549	3.2449	0.947158	5.97959	0.901152	5.69565	1.60779	6.69565	1.14554	3.02	0.795138	6.06	0.956396	5.08	1.77764	7.12	1.39403	3.03922	0.999215	6.01961	0.860005	5.6087	1.67167	7.30435	1.22232	3.22917	0.721688	6.02083	0.999778	5.16	1.74833	6.56	1.26095	3.15385	1.08415	5.96154	0.823688	5.90909	1.70027
514	怪声怪气	Strange voice and manner	negative	2.84783	0.94204	5.54348	1.44078	5.28571	1.38444	7.06122	1.24847	2.77273	0.869144	5.45455	1.47122	5.375	1.52693	6.91667	0.928611	2.91667	1.01795	5.625	1.43898	5.2	1.25831	7.2	1.5	2.875	1.07592	5.66667	1.46456	5.16	1.49108	7.36	1.28712	2.81818	0.795006	5.40909	1.43623	5.41667	1.28255	6.75	1.15156	2.66667	1.07309	5.41667	1.44338	5.15385	1.72463
515	关门弟子	Last disciple of a master	neutral	5.60417	1.19822	5.33333	1.61553	4.65306	1.75061	6.95918	1.22405	5.64	1.11355	5.56	1.35647	4.125	1.96297	6.91667	0.880547	5.56522	1.30823	5.08696	1.85651	5.16	1.37477	7	1.5	5.58333	1.44212	5.375	1.55515	5.04348	1.63702	7.04348	1.14726	5.625	0.923721	5.29167	1.70623	4.30769	1.80597	6.88462	1.3062	5.30769	1.25064	5.38462	1.50214	4.63636	2.15744
516	观光电梯	Sightseeing elevator	neutral	5.52174	0.960072	4.43478	1.90499	5.08	2.04879	7.18	1.17265	5.27273	0.550482	4.68182	1.2868	4.16	1.8412	6.92	0.953939	5.75	1.18872	4.20833	2.34018	6	1.84842	7.44	1.32539	5.625	1.0135	4.375	2.33708	5.20833	1.99955	7.125	1.42379	5.40909	0.908116	4.5	1.33631	4.96154	2.12567	7.23077	0.908083	5.16667	0.389249	4.41667	1.56428	4.58333	1.88092
517	观音大士	Goddess of mercy	neutral	5.67391	0.870615	5.13043	1.86915	3.79167	1.62374	5.85417	2.12372	5.65217	0.934622	5.26087	1.65742	4.17391	1.52709	5.86957	1.7915	5.69565	0.822125	5	2.08893	3.44	1.66032	5.84	2.42693	5.71429	0.64365	4.71429	2.10102	3.64	1.8	5.88	2.31517	5.64	1.03602	5.48	1.61038	3.95652	1.4295	5.82609	1.94591	5.5	0.527046	4.8	1.75119	3.53846	1.8081
518	观音娘娘	Goddess of mercy empress	neutral	5.80851	1.035	4.87234	1.92937	3.61702	1.62257	6.95745	1.58742	5.8	1.1547	4.96	1.61967	3.78261	1.59421	6.3913	1.43777	5.81818	0.906924	4.77273	2.26635	3.45833	1.66757	7.5	1.56038	5.82609	1.11405	5.04348	2.1842	3.63636	1.7874	7.27273	1.63829	5.79167	0.977093	4.70833	1.68056	3.6	1.5	6.68	1.51987	5.92308	1.32045	5.30769	1.93152	3.54545	1.91644
519	官逼民反	Being oppressed by officials, the masses revolt against them	negative	2.72115	1.43098	6.86538	1.50764	3.71739	2.20769	6.73913	1.6524	2.9434	1.74769	6.43396	1.79218	4.04167	2.34945	6.375	2.01759	2.4902	0.966903	7.31373	0.969334	3.36364	2.03646	7.13636	1.03719	2.54902	1.44656	7.01961	1.449	3.47826	2.01967	6.43478	2.04108	2.88679	1.40959	6.71698	1.56128	3.95652	2.40224	7.04348	1.10693	2.6	1.73205	6.6	1.73205	4	2.54951
520	官方消息	Official news	neutral	5.19565	0.778019	4.91304	1.44262	3	1.5	7.20408	1.44308	5.41667	0.829702	5.33333	0.701964	2.95833	1.60106	6.91667	1.63964	4.95455	0.652998	4.45455	1.87025	3.04	1.42829	7.48	1.19443	5.28	1.02144	5.08	1.46969	3.12	1.64114	7	1.63299	5.09524	0.300793	4.71429	1.41926	2.875	1.36135	7.41667	1.21285	5.61538	1.04391	5.46154	0.77625	3.23077	1.69085
521	冠冕堂皇	Highfalutin	negative	3.5534	1.21048	5.76699	0.992164	4.75	1.39146	7.0625	1.11863	3.86792	1.33067	5.49057	0.932792	4.64	1.25433	6.68	1.28193	3.22	0.974993	6.06	0.977502	4.86957	1.54638	7.47826	0.730477	3.46296	1.23949	5.74074	1.0848	4.75	1.56733	6.875	1.36135	3.65306	1.18235	5.79592	0.889279	4.75	1.22474	7.25	0.793999	3.82143	1.44154	5.42857	1.06904	4.53846	1.61325
522	惯性定律	Inertia law	neutral	5.02381	0.154303	3.92857	1.55223	4.45098	2.30923	7.09804	1.53954	5.04762	0.218218	4.61905	1.16087	4.03704	1.97058	6.62963	1.77911	5	0	3.2381	1.6095	4.91667	2.60295	7.625	1.0135	5	0	3.63636	1.76056	4.48	2.04369	6.68	1.81934	5.05	0.223607	4.25	1.25132	4.42308	2.57951	7.5	1.10454	5	0	4.33333	1.49747	4.35714	1.59842
523	光脚丫子	Barefoot	neutral	4.98	1.10078	5.15	1.15798	6.34694	1.58838	7.34694	1.21708	4.66667	0.78098	5.08333	0.820828	6	1.53226	6.95833	1.23285	5.26923	1.26979	5.21154	1.40498	6.68	1.6	7.72	1.1	5.04	0.946745	4.96	1.10583	6.21739	1.80798	7.3913	1.33958	4.92	1.24278	5.34	1.18855	6.46154	1.39229	7.30769	1.12318	4.79167	0.779028	4.95833	0.907896	5.54545	1.75292
524	光可鉴人	Be brilliant enough to reflect one's image	positive	6.22222	1.25931	5.44444	1.48562	4.52941	1.44711	5.37255	2.16297	6.04762	1.35927	5.90476	1.26114	4.11538	1.68112	6.26923	1.48479	6.375	1.1726	5.04167	1.57367	4.96	1.0198	4.44	2.38188	6.33333	1.49395	5.58333	1.58572	4.68	1.65126	5.6	2.23607	6.09524	0.94365	5.28571	1.38358	4.38462	1.23538	5.15385	2.11078	6	1.59545	6.08333	1.44338	4.15385	1.90815
525	广告文化	Advertising culture	neutral	4.85714	0.688641	4.73469	1.13565	4.74	1.79353	6.86	1.39985	4.97917	0.437088	4.6875	0.926128	4.92	1.70587	6.56	1.58325	4.74	0.852607	4.78	1.31382	4.56	1.89473	7.16	1.1431	4.91667	0.646869	4.8125	1.06504	4.68	1.8421	7.12	1.30128	4.8	0.728431	4.66	1.2056	4.8	1.77951	6.6	1.47196	5	0	4.54167	1.21509	4.46154	1.76141
526	广开财路	Broadening the way of wealth	positive	6.57447	1.21126	6.42553	1.5845	5.97826	1.85579	7.13043	1.06685	6.47826	1.03877	6	1.67874	5.30435	2.26505	7.08696	0.733178	6.66667	1.37261	6.83333	1.40393	6.65217	0.982052	7.17391	1.33662	6.54545	1.18431	6.18182	1.70814	5.56522	2.04108	7.17391	0.984063	6.6	1.25831	6.64	1.46856	6.3913	1.588	7.08696	1.16436	6.4	0.966092	5.7	1.94651	4.81818	2.52262
527	归根究底	After all is said and done; in the final analysis	neutral	5.26214	0.979808	5.15534	1.28152	5.11321	1.78304	7.07547	1.31338	5.37255	0.87088	5.35294	0.890472	4.17857	1.49204	6.75	1.32288	5.15385	1.07347	4.96154	1.5588	6.16	1.49108	7.44	1.22746	5.16	0.865672	5.36	1.06445	5.15385	1.64176	6.80769	1.62528	5.35849	1.07586	4.96226	1.44065	5.07407	1.93998	7.33333	0.877058	5.4	0.763763	5.64	0.757188	4.35714	1.54955
528	归心如箭	Eager to home	positive	6.26087	1.25494	6.6087	1.42171	4.97959	2.17457	7.61224	0.931315	6.47826	1.47308	6.73913	1.54383	4.95833	1.98865	7.41667	0.974308	6.04348	0.975997	6.47826	1.30974	5	2.38048	7.8	0.866025	6.36	1.43991	6.84	1.43411	4.82609	2.12458	7.69565	0.87567	6.14286	1.01419	6.33333	1.39044	5.11538	2.25081	7.53846	0.989172	6.61538	1.7097	7.07692	1.5525	4.90909	2.16585
529	鬼鬼祟祟	Sneaking	negative	2.71812	1.15712	6.11409	1.35831	4.88776	1.70435	7.11224	1.21742	2.34247	1.04375	6.17808	1.50317	4.79592	1.683	6.69388	1.31028	3.07895	1.15196	6.05263	1.2099	4.97959	1.73793	7.53061	0.959645	2.59211	1.35821	6.28947	1.52154	4.91837	1.60516	7.26531	1.07578	2.84932	0.892425	5.93151	1.1466	4.85714	1.8143	6.95918	1.3379	2.07895	1.09992	6.44737	1.62243	4.76	1.83212
530	鬼话连篇	Tell a whole series of lies	negative	2.51961	0.930563	6.36275	1.0416	5.02128	1.81167	7.29787	0.998148	2.28302	0.987954	6.35849	1.21044	5.6087	1.99406	7.08696	1.04067	2.77551	0.79753	6.36735	0.834013	4.45833	1.444	7.5	0.932505	2.32692	0.96449	6.51923	1.05701	5.04348	1.98811	7.26087	1.13688	2.72	0.858095	6.2	1.01015	5	1.66812	7.33333	0.868115	2.03571	0.961563	6.67857	1.18801	5.54545	2.50454
531	国富民强	The nation is prosperous and the people are strong and powerful	positive	7.73585	1.07173	6.88679	1.78523	3.38462	2.23303	7.75	0.882843	7.92593	1.09634	6.72222	2.19276	2.92593	2.12903	7.51852	0.848998	7.53846	1.01868	7.05769	1.22736	3.88	2.27889	8	0.866025	7.80769	1.02972	6.84615	1.80831	3.88462	2.47106	7.65385	0.891843	7.66667	1.11592	6.92593	1.77883	2.88462	1.88312	7.84615	0.880559	7.96154	0.99923	6.84615	2.16688	3.35714	2.46848
532	果能如此	If so	neutral	5.80851	0.797777	5.46809	1.51587	5.26531	1.31934	6.77551	1.50368	5.83333	0.868115	5.375	1.37722	5.25	1.07339	6.625	1.1726	5.78261	0.735868	5.56522	1.67403	5.28	1.54164	6.92	1.77764	5.95833	0.750604	5.625	1.31256	5.45833	1.10253	6.41667	1.66594	5.65217	0.831685	5.30435	1.71715	5.08	1.49778	7.12	1.26886	5.83333	0.717741	5.83333	0.834847	5.16667	0.937437
533	过河拆桥	Burn the bridge after crossing it	negative	2.40426	1.15457	6.53191	1.73018	5.04167	2.14336	7.35417	0.999778	2.52174	1.20112	6.3913	1.67167	5.16667	2.29682	6.95833	1.0417	2.29167	1.12208	6.66667	1.8098	4.91667	2.01983	7.75	0.793999	2	0.953463	7.04348	1.29609	4.81818	2.23897	7.5	1.14434	2.79167	1.21509	6.04167	1.96666	5.23077	2.08437	7.23077	0.862911	2.18182	1.07872	6.90909	1.3751	4.90909	2.54773
534	过桥米线	Rice-flour noodles popular in yunnan province	neutral	5.48889	1.12052	4.95556	1.36441	6.07692	2.15885	7.57692	1.14354	5	0.316228	4.95238	0.669043	4.92857	1.76233	7.25	1.23603	5.91667	1.38051	4.95833	1.78104	7.41667	1.79169	7.95833	0.907896	5.61905	1.20317	4.7619	1.48003	6.32	1.90875	7.48	1.26227	5.375	1.05552	5.125	1.2619	5.85185	2.38107	7.66667	1.03775	5	0	5.11111	0.333333	5.35714	1.39268
535	孩子他妈	The child's mother	neutral	5.42222	1.15776	5.13333	1.75292	4.92308	2.08492	7.51923	1.05701	5.63636	1.00216	5.22727	1.65994	4.64286	2.11195	7.42857	0.997351	5.21739	1.27766	5.04348	1.8703	5.25	2.04833	7.625	1.13492	5.15	1.08942	4.75	1.83174	4.88462	2.17857	7.38462	1.26734	5.64	1.18603	5.44	1.66032	4.96154	2.0294	7.65385	0.79711	5.77778	0.971825	5.33333	1.93649	4.78571	2.42356
536	海底捞月	Strive for the impossible	neutral	5.02222	1.33976	5.71111	1.21771	4.23404	1.73472	6.93617	1.18696	5	1.65145	5.78261	1.34693	4.125	1.91816	6.58333	1.24819	5.04545	0.950051	5.63636	1.09307	4.34783	1.5553	7.30435	1.01957	4.95	1.35627	5.65	1.03999	3.95455	1.61768	6.86364	1.28343	5.08	1.35154	5.76	1.3626	4.48	1.82848	7	1.11803	5.1	1.72884	6	1.33333	3.81818	1.77866
537	海角天涯	Far-off regions	positive	6.125	1.12278	5.22917	1.99189	3.44898	1.68401	7.32653	1.17947	6.08	1.18743	5.44	1.52971	3.28	1.81475	7.2	1.19024	6.17391	1.07247	5	2.41209	3.625	1.55515	7.45833	1.17877	6.48	1.15902	5.48	2.14321	3.41667	1.74248	7.41667	1.17646	5.73913	0.963771	4.95652	1.82105	3.48	1.66132	7.24	1.2	6.30769	1.31559	5.92308	1.32045	3.33333	2.01509
538	海外赤子	Overseas compatriot	positive	6.1875	1.19674	5.6875	1.44629	4.12766	1.51251	6.93617	1.13068	6.4	1.25831	5.68	1.34536	3.66667	1.73623	6.83333	0.916831	5.95652	1.10693	5.69565	1.57926	4.6087	1.07615	7.04348	1.3307	6.29167	1.33447	5.83333	1.12932	4.4	1.5	6.88	1.26886	6.08333	1.05981	5.54167	1.71893	3.81818	1.50036	7	0.9759	6.38462	1.55662	5.61538	1.26085	3.84615	1.72463
539	海外奇谈	A strange story from beyond the seas	neutral	5.70833	1.30398	5.45833	1.68798	4.42857	1.24164	6.38776	1.61782	5.45833	1.41357	5.54167	1.444	3.875	1.42379	6.125	1.2959	5.95833	1.16018	5.375	1.92946	4.96	0.734847	6.64	1.86815	5.83333	1.0495	5.875	1.56906	4.625	1.09594	6.08333	1.79169	5.58333	1.5299	5.04167	1.73153	4.24	1.3626	6.68	1.40594	5.58333	0.996205	6.08333	0.900337	4.08333	1.31137
540	含垢忍辱	Bear shame and humiliation	negative	3.47826	1.57394	6.43478	1.55852	4.09615	1.6599	5.86538	2.23193	3.59091	1.6521	5.90909	1.54023	4.74074	1.72298	6.03704	1.76464	3.375	1.52693	6.91667	1.44212	3.4	1.29099	5.68	2.6727	3.29167	1.80529	6.91667	1.44212	3.88462	1.86176	5.65385	2.03848	3.68182	1.2868	5.90909	1.54023	4.30769	1.43581	6.07692	2.43184	3.08333	1.83196	6.58333	1.50504	4.5	1.99036
541	含含混混	Ambiguous	negative	3.76087	0.793999	5.52174	0.982946	5.36735	1.23649	6.55102	1.69633	3.77273	0.81251	5.45455	0.9625	5.25	1.22474	6.79167	1.02062	3.75	0.793999	5.58333	1.01795	5.48	1.26227	6.32	2.15484	3.70833	0.858673	5.25	0.896854	5.44	1.22746	6.72	1.51438	3.81818	0.732664	5.81818	1.00647	5.29167	1.26763	6.375	1.88386	3.75	0.866025	5.41667	0.792961	5.15385	1.14354
542	含笑九泉	Die with smile	neutral	4.8125	1.95324	5.83333	1.62864	4.21277	2.07402	7.06383	1.25809	4.91667	2.04124	6.16667	1.49395	4	2.31595	6.91304	1.41142	4.70833	1.89918	5.5	1.71945	4.41667	1.83958	7.20833	1.10253	4.84	2.17332	6	1.75594	4.20833	2.26465	6.83333	1.60615	4.78261	1.73091	5.65217	1.49571	4.21739	1.90589	7.30435	0.702902	4.69231	2.35884	6.53846	1.33012	4.33333	2.77434
543	含辛茹苦	Bear bitter hardships	neutral	4.93878	1.43481	5.71429	1.84842	5.14894	1.94466	7.29787	1.24961	5.2	1.47196	5.92	1.32035	5.30435	2.0766	6.95652	1.02151	4.66667	1.37261	5.5	2.28416	5	1.84155	7.625	1.37722	4.92	1.18743	5.92	1.63095	5	2.04302	7.16667	1.30773	4.95833	1.68056	5.5	2.06419	5.30435	1.86924	7.43478	1.19947	4.92308	1.44115	6.15385	0.987096	5.08333	2.2747
544	含血喷人	Make slanderous charges at sb	negative	2.24444	1.1512	7.13333	1.67332	4.40426	1.86104	6.76596	1.41748	2.22727	1.23179	6.63636	1.96506	4.73913	1.88818	6.3913	1.33958	2.26087	1.09617	7.6087	1.19617	4.08333	1.81579	7.125	1.42379	2.21739	1.24157	7.26087	1.68462	4.78261	1.92959	6.86957	1.51671	2.27273	1.07711	7	1.69031	4.04167	1.75646	6.66667	1.34056	2.27273	1.48936	6.72727	2.00454	4.81818	1.88776
545	含冤负屈	Suffer an unjust grievance	negative	2.54348	1.24198	6.5	1.90613	3.16	1.50319	6.92	1.32234	2.59091	1.22121	6.04545	2.33966	3.53846	1.58065	6.84615	1.00766	2.5	1.28537	6.91667	1.31601	2.75	1.32698	7	1.61515	2.65217	1.43364	6.43478	2.04108	3.04	1.2741	6.68	1.62583	2.43478	1.03687	6.56522	1.80469	3.28	1.72047	7.16	0.898146	2.54545	1.50756	6.09091	2.50817	3.23077	1.5359
546	寒来暑往	As summer goes and winter comes	neutral	5.15556	0.824499	4.62222	1.70945	3.65306	2.04686	7.26531	1.4109	5.22727	0.751622	5.09091	1.37699	3.04167	1.87615	7.16667	1.20386	5.08696	0.900154	4.17391	1.89862	4.24	2.0672	7.36	1.60416	5.20833	0.832971	4.58333	1.86307	3.5	1.69398	7.04167	1.73153	5.09524	0.830949	4.66667	1.55991	3.8	2.36291	7.48	1.00499	5.33333	0.887625	5	1.80907	2.75	1.81534
547	汉语拼音	Chinese phonetic alphabet	neutral	5.19565	0.401085	4.08696	1.65766	5.56863	2.30004	7.80392	1.03961	5.29167	0.464306	4.70833	1.30148	5	2.22711	7.46154	0.989172	5.09091	0.294245	3.40909	1.76363	6.16	2.26716	8.16	0.986577	5.30435	0.470472	4.21739	1.78266	5.23077	2.15977	7.57692	1.20576	5.08696	0.288104	3.95652	1.55149	5.92	2.43105	8.04	0.789515	5.38462	0.50637	4.53846	1.71345	5.07143	2.1649
548	汗如雨下	Sweat profusely	neutral	4.31818	1.4591	6.15909	1.27486	4.95833	1.92363	7.52083	0.945079	4.3	1.17429	5.8	1.00525	4.83333	1.99274	7.20833	0.883627	4.33333	1.6854	6.45833	1.41357	5.08333	1.88626	7.83333	0.916831	3.73913	1.45282	6.17391	1.23038	4.79167	2.02117	7.54167	0.977093	4.95238	1.20317	6.14286	1.35225	5.125	1.84891	7.5	0.932505	4.36364	1.20605	5.72727	0.64667	4.75	2.09436
549	汗水淋漓	Be streaming with sweat	neutral	4.38298	1.5116	5.51064	1.30004	5.26531	1.66803	7.55102	0.958758	4.32	1.62583	5.52	1.19443	5.2	1.68325	7.32	1.02956	4.45455	1.405	5.5	1.43925	5.33333	1.6854	7.79167	0.832971	4.04167	1.70623	5.54167	1.31807	5.33333	1.63299	7.54167	1.02062	4.73913	1.21421	5.47826	1.30974	5.2	1.73205	7.56	0.916515	3.61538	1.50214	5.84615	1.06819	4.76923	1.92154
550	旱涝灾害	Drought and flood disaster	negative	2.67391	1.15575	6.32609	1.68726	2.47826	1.51642	7.28261	1.16739	2.69565	1.25896	5.65217	1.87347	2.65217	1.6127	7.30435	0.97397	2.65217	1.07063	7	1.16775	2.30435	1.42812	7.26087	1.35571	2.28571	1.10195	6.95238	1.32198	2.6087	1.8025	7.43478	1.27301	3	1.11803	5.8	1.80278	2.34783	1.19121	7.13043	1.05763	2.3	1.41814	6.6	1.3499	2.72727	2.00454
551	行车执照	Driving license	neutral	5.02128	0.206284	4.55319	1.36482	4.89583	2.00255	7.22917	1.40273	5	0	4.93478	0.442326	4.125	1.91816	7.16667	1.27404	5.04167	0.288675	4.1875	1.79427	5.66667	1.8098	7.29167	1.5458	5	0	4.5	1.14988	4.72727	2.11979	7.63636	1.21677	5.04167	0.288675	4.60417	1.55385	5.03846	1.92833	6.88462	1.47856	5	0	4.83333	0.481543	3.90909	2.46798
552	行若无事	Behave as if nothing had happened	neutral	4.93396	0.97852	4.75472	1.27101	5.84783	1.4448	6.36957	1.75574	5.16667	0.884884	4.61111	1.08882	5.59091	1.00755	6.04545	1.43019	4.69231	1.02016	4.90385	1.43157	6.08333	1.74248	6.66667	1.99274	5	0.898717	4.88679	1.17113	6	1.41421	6.72727	1.93174	4.86792	1.0568	4.62264	1.36193	5.70833	1.48848	6.04167	1.5458	5.21429	0.832539	4.71429	1.15011	5.63636	1.28629
553	行善积德	Good deeds	positive	7.23077	0.997383	5.67308	1.88732	6.42857	1.80278	7.42857	1.06066	7.38889	1.0536	6.09259	1.88608	5.92	2.11975	7.4	0.957427	7.06	0.912722	5.22	1.79898	6.95833	1.23285	7.45833	1.17877	7.2549	1.12859	5.90196	1.73499	6.45833	1.97768	7.45833	0.977093	7.20755	0.862877	5.45283	2.015	6.4	1.65831	7.4	1.1547	7.33333	1.14354	6.44444	1.76141	5.76923	2.35067
554	行凶作恶	Break the law and commit evils	negative	1.85714	0.913874	7.34286	1.27723	3.82	1.87017	7.16	1.20136	1.59615	0.798519	7.44231	1.39204	3.53846	1.98456	6.80769	1.20064	2.11321	0.953947	7.24528	1.15867	4.125	1.72734	7.54167	1.10253	1.71154	0.824539	7.55769	1.1447	3.79167	1.69344	7.08333	1.17646	2	0.980581	7.13208	1.37334	3.84615	2.05314	7.23077	1.24283	1.4	0.5	7.8	1.08012	3.46154	1.94145
555	毫无逊色	Not a halfpenny the worse	positive	6.06383	1.32541	5.46809	1.86327	5.66667	1.47797	6.9375	1.34332	5.86957	1.48643	5.17391	1.77488	5.13043	1.45553	6.56522	1.23679	6.25	1.15156	5.75	1.9393	6.16	1.34412	7.28	1.36991	6.40909	1.22121	5.27273	1.95623	6.04348	1.46095	7.13043	1.51671	5.76	1.3626	5.64	1.8	5.32	1.43527	6.76	1.16476	6.2	1.13529	4.7	1.76698	5.63636	1.68954
556	好景不常	Not every day is sunday; a good time never lasts long	negative	3.06818	0.974028	5.93182	1.48477	3.69388	1.59693	6.89796	1.69859	3.04545	1.21409	5.72727	1.7507	4.28	1.72047	6.2	1.91485	3.09091	0.683763	6.13636	1.16682	3.08333	1.21285	7.625	1.05552	2.86364	1.03719	5.95455	1.61768	3.625	1.8133	6.83333	1.8098	3.27273	0.882735	5.90909	1.37699	3.76	1.39284	6.96	1.61967	2.6	1.17379	5.7	1.94651	4.15385	2.19265
557	好梦难圆	Good dreams seldom come true.	negative	3.97872	1.2767	5.74468	1.35884	3.91667	1.72384	7.14583	1.23753	3.73913	1.32175	5.43478	1.53226	4.16667	1.63299	7.125	1.07592	4.20833	1.21509	6.04167	1.12208	3.66667	1.8098	7.16667	1.40393	3.95455	1.43019	5.5	1.40577	3.95455	1.96341	7.40909	0.959121	4	1.1547	5.96	1.30639	3.88462	1.53172	6.92308	1.41204	3.5	1.64992	5.4	1.83787	4	1.84391
558	好上加好	Make perfection more perfect	positive	7.24528	1.02178	6.61321	1.46431	6.2449	1.56166	7.53061	0.892143	7.12963	1.1167	6.38889	1.75281	5.69231	1.69161	7.53846	1.06699	7.36538	0.908108	6.84615	1.05505	6.86957	1.14035	7.52174	0.665348	7.37037	1.1541	6.85185	1.21946	6.41667	1.66594	7.625	0.875388	7.11538	0.855291	6.36538	1.65718	6.08	1.46969	7.44	0.916515	7.14815	1.32153	6.92593	1.2987	5.69231	1.88788
559	好事之徒	A person who likes to meddlesome	negative	3.22772	1.06659	5.84158	1.17246	4.57143	1.5	6.65306	1.37766	3.52941	1.17223	5.68627	1.02937	4.88462	1.3062	6.61538	1.26734	2.92	0.853325	6	1.29363	4.21739	1.65025	6.69565	1.52061	3.18367	1.07381	6.16327	0.964947	4.125	1.22696	6.625	1.31256	3.26923	1.06854	5.53846	1.27512	5	1.63299	6.68	1.46401	3.52	1.15902	5.96	0.978093	4.38462	0.960769
560	好言好语	Speak in a kind manner	positive	6.21739	1.26338	5.6087	1.45263	5.72549	1.92954	7.29412	0.831724	6.18182	1.05272	5.63636	1.39882	5.37037	2.04089	7.2963	0.91209	6.25	1.45213	5.58333	1.5299	6.125	1.75233	7.29167	0.750604	6.20833	1.444	5.41667	1.74248	6.08	1.52534	7.2	0.866025	6.22727	1.066	5.81818	1.05272	5.38462	2.22849	7.38462	0.803837	6.16667	1.2673	5.41667	1.78164	5.5	1.7867
561	浩气长存	Imperishable noble spirit	positive	7	1.42918	7	1.42918	4.66667	2.15696	7	1.42918	7.41667	1.47196	7.5	1.25109	3.45833	1.86452	7.29167	0.999094	6.58333	1.28255	6.5	1.44463	5.875	1.72734	6.70833	1.73153	7.32	1.34536	7.12	1.53623	4.95455	2.19257	6.90909	1.925	6.65217	1.46501	6.86957	1.32474	4.42308	2.13866	7.07692	0.844894	7.76923	1.30089	8.15385	0.987096	3.72727	1.90215
562	何足挂齿	Not worth bothering about	neutral	5.31959	0.835992	5.19588	1.14236	5.85417	1.30449	7.20833	1.2021	5.17391	0.901957	5.34783	0.706081	5.65217	0.982052	6.86957	1.09977	5.45098	0.75667	5.05882	1.42002	6.04	1.54056	7.52	1.22882	5.21569	0.923336	5.15686	1.00742	5.91304	1.20276	7.21739	1.34693	5.43478	0.719635	5.23913	1.28556	5.8	1.41421	7.2	1.08012	5.16	1.10604	5.28	0.791623	5.90909	1.30035
563	何罪之有	How come the fault of	neutral	4.17391	1.28762	5.65217	1.53793	4.62745	1.75455	6.82353	1.57106	4.09091	1.37699	5.86364	1.24577	4.5	1.70294	6.42308	1.57919	4.25	1.22474	5.45833	1.76879	4.76	1.83212	7.24	1.47986	4.29167	1.42887	5.375	1.71471	4.36	1.68028	7.08	1.68127	4.04545	1.13294	5.95455	1.29016	4.88462	1.81828	6.57692	1.44701	4.25	1.42223	5.83333	1.33712	4.23077	1.64083
564	和和美美	Getting along very well	positive	7.01429	1.06621	5.22857	2.04402	5.81633	1.74013	7.34694	0.969343	7.2037	1.03486	5.68519	2.15287	5.72	1.81475	7.04	1.0198	6.81373	1.0722	4.7451	1.82036	5.91667	1.69184	7.66667	0.816497	7.08654	1.17874	5.55769	2.12744	5.75	1.79976	7.25	1.11316	6.9434	0.948989	4.90566	1.92418	5.88	1.71561	7.44	0.820569	7.39286	1.06595	6.25	2.18793	5.58333	2.15146
565	和和睦睦	Harmony	positive	6.97959	1.42141	5.04082	2.16948	6	1.66312	7.5	1.05185	6.96	1.48549	5.28	2.52521	6.08333	1.6129	7.20833	1.06237	7	1.38313	4.79167	1.74404	5.91667	1.74248	7.79167	0.977093	7.07692	1.52113	4.96154	2.16298	6.29167	1.68056	7.58333	1.1389	6.86957	1.32474	5.13043	2.22188	5.70833	1.62799	7.41667	0.974308	7	1.61722	5.21429	2.77845	5.91667	2.02073
566	和气生财	Friendliness is conducive to business success	positive	7	1.20283	4.80208	2.17515	5.85417	1.89051	7.33333	1.05857	7.12	1.33292	5.16	2.30362	5.73913	2.09366	7.34783	0.831685	6.86957	1.05763	4.41304	2.0037	5.96	1.7195	7.32	1.249	7.08333	1.21285	4.85417	2.26255	6.04348	1.69164	7.6087	1.07615	6.91667	1.21285	4.75	2.13154	5.68	2.07605	7.08	0.996661	7.07692	1.32045	5.23077	2.58695	6	1.84391
567	和颜悦色	A benign countenance	positive	6.64583	1.48022	4.79167	1.96738	6.5625	1.55613	7.60417	1.16216	6.70833	1.45898	5.625	1.88386	6.52174	1.67521	7.21739	1.24157	6.58333	1.5299	3.95833	1.70623	6.6	1.47196	7.96	0.978093	6.88	1.39403	4.8	2.14087	7.04348	1.29609	7.65217	1.19121	6.3913	1.55911	4.78261	1.80798	6.12	1.66633	7.56	1.15758	6.84615	1.62512	5.38462	2.36426	7.18182	1.47093
568	黑不溜秋	Black; 如果形容肤色黑：swarthy	negative	3.79167	0.849489	5.04167	1.51529	4.34	1.28746	7.08	1.42628	3.66667	0.816497	5.33333	0.816497	4.12	1.30128	6.72	1.17331	3.91667	0.880547	4.75	1.96159	4.56	1.26095	7.44	1.58325	3.79167	0.779028	4.91667	1.63964	4.16667	1.23945	7.25	1.51083	3.79167	0.931533	5.16667	1.40393	4.5	1.33417	6.92308	1.3542	3.5	0.6742	5.25	0.965307	3.91667	1.56428
569	黑色火药	Black gunpowder	neutral	4.28889	1.23624	5.33333	1.3817	3.88	1.955	6.22	1.90905	4.3913	1.03305	5.17391	0.716822	3.64	1.823	5.88	2.02731	4.18182	1.43548	5.5	1.8452	4.12	2.08806	6.56	1.75784	4.22727	1.34277	4.81818	1.36753	3.625	1.88386	5.79167	1.84106	4.34783	1.15242	5.82609	1.23038	4.11538	2.02636	6.61538	1.91994	4.16667	1.33712	5.16667	0.57735	3.25	1.65831
570	黑天白日	Night and day	neutral	5.06522	0.711873	4.19565	1.57225	3.24	1.68499	6.74	1.83848	5.04545	0.485727	4.72727	1.2792	3.26923	1.82335	7.23077	1.06987	5.08333	0.880547	3.70833	1.68056	3.20833	1.5598	6.20833	2.32153	5.13636	0.560226	3.63636	1.64882	3.16	1.67531	7.16	1.772	5	0.834058	4.70833	1.33447	3.32	1.7253	6.32	1.8421	5	0	4.1	1.52388	2.76923	1.64083
571	哼哼哈哈	Hum haha	neutral	4.55769	1.13057	5.29808	1.06013	5.52174	1.16884	6.84783	1.4448	4.34615	0.967808	5.28846	0.893035	5.5	1.05785	6.59091	1.05375	4.76923	1.24641	5.30769	1.2133	5.54167	1.28466	7.08333	1.71735	4.7037	1.25337	5.24074	1.18058	5.69565	1.01957	7.08696	1.41142	4.4	0.968904	5.36	0.920514	5.34783	1.30065	6.6087	1.46905	4.48148	1.08735	5.44444	0.974022	5.81818	1.16775
572	哼哼唧唧	Groan and moan	negative	3.52174	1.42578	5.34783	1.44864	5.63265	1.37982	6.89796	1.53086	3.54545	1.37069	4.86364	1.67034	5.54167	1.69344	6.79167	1.14129	3.5	1.50362	5.79167	1.06237	5.72	1.02144	7	1.84842	3.28571	1.14642	5.66667	1.42595	5.66667	1.16718	7.04167	1.23285	3.72	1.6207	5.08	1.44106	5.6	1.58114	6.76	1.78606	3.33333	1.11803	5.22222	1.7873	5.66667	1.43548
573	恒久不变	Constant	neutral	5.87755	1.49489	5.10204	1.51719	4.41667	2.30479	7	1.11087	5.8	1.11803	5.44	1.00333	4.6087	2.31083	6.91304	0.900154	5.95833	1.82921	4.75	1.87083	4.24	2.33238	7.08	1.28841	6.04	1.42829	5.12	1.66633	4.33333	2.37133	6.83333	1.30773	5.70833	1.57367	5.08333	1.38051	4.5	2.28416	7.16667	0.868115	5.69231	1.1094	5.76923	1.01274	5.08333	2.50303
574	恒温动物	Thermostat	neutral	5.01042	0.177396	4.45833	1.16905	4.57447	1.63846	6.48936	1.79216	5	0	4.88889	0.382707	3.66667	1.43456	6.29167	1.87615	5.01961	0.244147	4.07843	1.46756	5.52174	1.27456	6.69565	1.71715	5	0	4.52083	1.09135	4.34783	1.22877	6.43478	1.77933	5.02083	0.251767	4.39583	1.25035	4.79167	1.95558	6.54167	1.84106	5	0	4.95652	0.366589	3.76923	1.36344
575	横眉立目	Attitude is fierce	negative	3.02128	1.13232	6.25532	1.72536	5.2449	1.86559	6.55102	1.72072	2.86957	1.14035	6.08696	2.15139	5.29167	1.62799	6.625	1.24455	3.16667	1.12932	6.41667	1.21285	5.2	2.10159	6.48	2.10396	3.04545	1.17422	6.40909	1.6521	5.52174	2.15047	7.17391	1.58551	3	1.11803	6.12	1.81016	5	1.5748	6	1.67332	2.8	1.0328	6.1	2.13177	5.72727	1.95402
576	横眉怒目	Face others with frowning brows and angry eyes	negative	3.04348	1.54857	6.30435	1.90752	5.08333	1.93328	7.20833	0.988408	3	1.85864	6.13043	2.20133	5.26087	1.71139	7	0.738549	3.08696	1.20276	6.47826	1.59173	4.92	2.13931	7.4	1.1547	2.63636	0.847711	6.22727	1.9744	5.04167	1.87615	7.20833	1.02062	3.41667	1.93181	6.375	1.88386	5.125	2.02833	7.20833	0.977093	2.45455	0.934199	6	2.19089	5.08333	1.78164
577	横眉竖眼	Put on a fierce look	negative	3.1875	1.26586	6.14583	1.41406	4.93617	1.73712	7.08511	1.13884	2.83333	1.16718	6.33333	1.6854	4.91304	1.97514	7.04348	0.824525	3.54167	1.28466	5.95833	1.08264	4.95833	1.51741	7.125	1.39292	2.84	1.34412	6.28	1.51438	4.91304	1.64905	6.91304	1.12464	3.56522	1.07982	6	1.31426	4.95833	1.85283	7.25	1.15156	2.53846	1.19829	6.30769	1.97419	5.09091	1.8684
578	横生枝节	Branch out; to cause complication	negative	3.5	1.16905	6	1.42984	3.87234	1.63677	6.78723	1.39776	3.63636	1.29267	6.04545	1.46311	3.86957	1.86607	6.43478	1.30823	3.375	1.05552	5.95833	1.42887	3.875	1.42379	7.125	1.42379	3.43478	1.07982	6	1.59545	4.04348	1.77042	6.43478	1.70096	3.56522	1.27301	6	1.2792	3.70833	1.51741	7.125	0.946963	3.72727	1.00905	5.63636	1.74773	3.90909	2.07145
579	轰轰隆隆	Rumbling	neutral	4.68317	0.989249	5.49505	1.18003	3.95918	1.36869	7.02041	1.28273	5.1	0.952976	5.54	0.734291	3.70833	1.48848	6.70833	1.0417	4.27451	0.850375	5.45098	1.50085	4.2	1.22474	7.32	1.43527	4.72549	0.826521	5.31373	1.28826	4.08696	1.53484	7.13043	1.17954	4.64	1.13856	5.68	1.03884	3.84615	1.22286	6.92308	1.38342	5.03846	0.823688	5.5	0.707107	3.45455	1.50756
580	红红火火	Booming	positive	6.80952	1.08393	6.52381	1.27924	5.08	1.80521	7.32	1.09619	6.79245	1.14956	6.66038	1.42698	4.8	1.97906	7.16	0.898146	6.82692	1.02366	6.38462	1.10531	5.36	1.60416	7.48	1.26227	6.98113	0.990155	6.71698	1.13302	5.20833	1.81729	7.41667	1.10007	6.63462	1.15519	6.32692	1.39637	4.96154	1.82166	7.23077	1.10662	7.07143	1.05158	7.14286	1.1127	4.66667	2.34844
581	红红绿绿	Colorful	neutral	5.61702	1.32785	5.3617	1.6074	4.81633	1.58999	7.02041	1.45043	5.76	1.56205	5.72	1.4	4.32	1.65126	7.12	0.971253	5.45455	1.01076	4.95455	1.75871	5.33333	1.37261	6.91667	1.83958	5.45833	1.17877	5.20833	1.74404	4.72	1.81475	7.32	1.1804	5.78261	1.47576	5.52174	1.47308	4.91667	1.34864	6.70833	1.65448	5.69231	1.37747	6.23077	1.09193	4	1.95789
582	红蓝铅笔	Pencil with one end red and the other blue	neutral	4.95556	0.298142	4.08889	1.56412	5.84	1.93106	7.4	1.38505	5	0.301511	5.04348	0.366589	4.92	1.57903	7.2	1.25831	4.90909	0.294245	3.09091	1.71573	6.76	1.83212	7.6	1.5	5	0.294884	3.79167	1.7932	5.92	1.49778	7.04	1.54056	4.90476	0.300793	4.42857	1.20712	5.76	2.31445	7.76	1.12842	5	0.408248	5.07692	0.493548	5.46154	1.19829
583	宏观世界	Macro world	neutral	5.42222	0.865734	4.42222	1.63052	3.34694	1.95311	7.20408	1.44308	5.58333	1.10007	4.79167	1.47381	3.04	1.85921	6.88	1.53623	5.2381	0.436436	4	1.73205	3.66667	2.03591	7.54167	1.28466	5.5	1.10195	4.36364	1.7874	3.8	2.08167	7	1.75594	5.34783	0.572768	4.47826	1.50362	2.875	1.72734	7.41667	1.01795	5.84615	1.3445	4.61538	1.93815	3.15385	1.99358
584	洪福齐天	Great fortune	positive	6.90741	1.08977	6.23148	1.66102	4	1.98956	6.2449	1.82038	6.96364	1.15412	6.45455	1.67573	3.66667	1.94862	6.16667	1.6594	6.84906	1.0265	6	1.62906	4.32	2.01494	6.32	1.99416	7.01786	1.15193	6.41071	1.5929	4.56522	2.2928	6.3913	1.87663	6.78846	1.01627	6.03846	1.72594	3.5	1.55563	6.11538	1.79615	7.17241	1.13606	6.89655	1.47224	4	2.28035
585	鸿雁传书	The book of wild goose	positive	6.52083	1.23753	5.9375	1.6296	4.91837	1.65626	7.06122	1.65086	7.12	1.23558	6.52	1.66132	4.58333	1.81579	7.25	1.15156	5.86957	0.868873	5.30435	1.36298	5.24	1.45144	6.88	2.02731	6.54167	1.28466	5.75	1.77544	5.08333	1.6129	7.20833	1.66757	6.5	1.21584	6.125	1.48361	4.76	1.71464	6.92	1.6563	7.15385	1.3445	6.61538	1.55662	4.83333	1.85047
586	后半辈子	The second half of one's lifetime	neutral	5	0.83666	4.87129	1.43988	4.83333	2.25344	7.52083	1.18483	5	0.456435	4.83673	0.986301	4.5	2.18692	7.20833	1.10253	5	1.08465	4.90385	1.7741	5.16667	2.31567	7.83333	1.20386	5.07692	0.882202	4.76923	1.74463	4.66667	2.4789	7.58333	1.24819	4.91837	0.786255	4.97959	1.03057	5	2.04302	7.45833	1.14129	5.07692	0.392232	4.73077	1.21845	4.41667	2.71221
587	后脑勺子	Back of the head	neutral	4.86869	0.52773	4.43434	1.34893	5.55102	1.89364	7.4898	1.20973	4.85417	0.460785	4.8125	0.673392	4.76	1.80924	7.28	1.36991	4.88235	0.588118	4.07843	1.69521	6.375	1.63687	7.70833	0.999094	4.94118	0.237635	4.27451	1.26615	5.8	1.89297	7.64	1.22066	4.79167	0.713348	4.60417	1.4253	5.29167	1.89918	7.33333	1.20386	5	0	4.69231	0.884047	5	1.58114
588	后院起火	Backyard fire	negative	2.93182	1.16933	6.86364	1.40747	3.58333	1.74835	6.70833	1.72538	2.65217	1.26522	6.69565	1.7693	3.83333	1.94862	6.5	1.66812	3.2381	0.995227	7.04762	0.86465	3.33333	1.52277	6.91667	1.79169	2.72727	1.24142	7.22727	1.066	3.58333	1.81579	6.70833	1.89918	3.13636	1.08213	6.5	1.62569	3.58333	1.71735	6.70833	1.57367	2.45455	1.21356	7.36364	1.12006	3.83333	2.2088
589	呼风唤雨	Have the power to control things and accomplish whatever they want	neutral	5.70213	1.58683	6.34043	1.20283	4.22449	2.4855	7.08163	1.44102	5.69565	1.42812	6.21739	1.0853	3.16667	1.90347	6.375	1.58286	5.70833	1.75646	6.45833	1.31807	5.24	2.5865	7.76	0.879394	5.56	1.55671	6.44	0.960902	4.16667	2.38959	7.125	1.15392	5.86364	1.64159	6.22727	1.44525	4.28	2.62234	7.04	1.69509	6.07692	1.25576	6.38462	1.1209	2.83333	1.74946
590	呼呼啦啦	Shout sounds	neutral	4.46667	0.842075	5.26667	1.46784	4.70588	0.985781	5.86275	1.89757	4.78261	0.850482	5.13043	1.05763	4.66667	1.1094	6.37037	1.41824	4.13636	0.710161	5.40909	1.81683	4.75	0.84699	5.29167	2.21613	4.6087	0.499011	4.91304	1.64905	4.76	0.597216	6.08	1.84662	4.31818	1.08612	5.63636	1.17698	4.65385	1.26309	5.65385	1.95841	4.83333	0.389249	5.08333	0.996205	4.71429	0.726273
591	呼伦贝尔	Hulunbeier	neutral	5.42857	0.940754	5.02381	1.65997	4.35417	1.40651	7.22917	1.61429	5.14286	0.478091	5	0.447214	3.875	1.6501	6.875	1.59653	5.71429	1.18924	5.04762	2.33401	4.83333	0.916831	7.58333	1.58572	5.66667	1.1547	5.33333	1.79815	4.08696	1.59297	7.17391	1.37021	5.19048	0.601585	4.71429	1.48805	4.6	1.19024	7.28	1.83757	5.09091	0.301511	4.90909	0.53936	3.5	1.88294
592	呼天抢地	Extremely sad	negative	3.38776	1.23855	5.97959	1.53419	4.64583	1.98387	6.39583	1.5944	3.32	1.4922	6.04	1.48549	4.83333	2.099	6.20833	1.38247	3.45833	0.931533	5.91667	1.6129	4.45833	1.8877	6.58333	1.79169	3.12	1.05357	6.28	1.30767	4.73913	2.2201	6.69565	1.42812	3.66667	1.37261	5.66667	1.711	4.56	1.78139	6.12	1.71561	2.92308	1.32045	6.46154	1.05003	5	2.68328
593	呼之即来	Come at someone's call	neutral	5.0625	1.77939	5.75	1.27996	4.97917	2.24546	7.14583	1.23753	5.84615	1.37673	5.80769	1.20064	5	2.08893	7.08696	1.16436	4.13636	1.78073	5.68182	1.3934	4.96	2.4235	7.2	1.32288	5	1.95604	6	1.25109	4.43478	2.08514	6.91304	1.37883	5.125	1.62354	5.5	1.28537	5.48	2.31157	7.36	1.07548	5.64286	1.7368	6.14286	1.16732	4.63636	2.01359
594	忽忽悠悠	Careless and carefree	neutral	4.19565	1.00265	5.1087	0.993943	5.25	1.50884	6.52083	1.65014	4.34783	1.0273	5.21739	1.04257	5.20833	1.53167	6.25	1.11316	4.04348	0.975997	5	0.953463	5.29167	1.51741	6.79167	2.04257	4.52	1.04563	5.12	0.832666	5	1.67874	7	1.53741	3.80952	0.813575	5.09524	1.17918	5.48	1.32665	6.08	1.6563	4.61538	1.1209	5.23077	1.01274	5	1.89737
595	忽冷忽热	Hot and cold	negative	3.54167	0.944375	5.58333	1.04847	4.19565	1.57225	7.28261	1.04696	3.56	0.916515	5.72	0.890693	4.56522	1.7536	6.78261	0.902347	3.52174	0.994053	5.43478	1.19947	3.82609	1.30217	7.78261	0.951388	3.625	1.0135	5.5	1.14208	4.22727	1.65994	7.36364	1.17698	3.45833	0.883627	5.66667	0.963087	4.16667	1.52277	7.20833	0.931533	3.61538	0.869718	5.76923	0.725011	5	1.89737
596	忽闪忽闪	Flicker	neutral	4.86275	0.890424	5.26471	0.88917	4.74	1.29063	6.56	1.6056	4.82353	0.654397	5.39216	0.602609	4.53846	1.24035	6.23077	1.5826	4.90196	1.08176	5.13725	1.0958	4.95833	1.33447	6.91667	1.58572	5.05882	0.967714	5.35294	0.770027	5.04	1.30639	7.04	1.30639	4.66667	0.765942	5.17647	0.9941	4.44	1.22746	6.08	1.75404	4.88462	0.711445	5.46154	0.581774	4.69231	1.4367
597	忽悠忽悠	In a leisurely manner or rhythm	negative	3.64583	1.15758	5.52083	1.48739	4.9375	1.8382	6.77083	1.47662	3.79167	1.14129	5.5	1.14208	4.79167	1.66757	6.79167	0.832971	3.5	1.17954	5.54167	1.7932	5.08333	2.01983	6.75	1.9393	3.41667	1.24819	5.70833	1.60106	4.83333	1.92617	6.95833	1.36666	3.875	1.03472	5.33333	1.37261	5.04167	1.78104	6.58333	1.58572	3.5	1.24316	5.75	1.13818	4.5	1.83402
598	狐假虎威	Rely on others to bully people	negative	2.86792	1.0961	6.29245	1.32354	4.1875	1.68417	6.91667	1.39655	2.62264	1.21254	6.50943	1.31006	4	1.50362	6.625	1.09594	3.11321	0.912738	6.07547	1.31338	4.375	1.86063	7.20833	1.61458	2.64815	1.08432	6.40741	1.42111	4.5	1.93368	7.16667	1.34056	3.09615	1.07118	6.17308	1.21625	3.875	1.36135	6.66667	1.43456	2.2963	1.1373	6.74074	1.28879	4.08333	1.78164
599	狐狸尾巴	Evil intention	negative	3.39362	1.35107	5.67021	1.22597	4.96078	1.56155	6.86275	1.29645	3.54167	1.50302	5.45833	1.02062	4.57692	1.4744	6.88462	1.07059	3.23913	1.1858	5.8913	1.3977	5.36	1.57797	6.84	1.51877	3.41304	1.57142	5.54348	1.28729	5.2	1.44338	7	1.08012	3.375	1.13492	5.79167	1.17877	4.73077	1.66271	6.73077	1.48479	3.33333	1.66969	5.75	0.753778	4.53846	0.77625
600	狐朋狗友	Evil associates	negative	2.72115	1.16132	6.11538	1.3675	4.5	1.82036	7.25	1.08239	2.4902	1.04638	6.09804	1.41781	4.18519	1.49453	6.85185	1.06351	2.9434	1.23125	6.13208	1.33067	4.84	2.09523	7.68	0.945163	2.60784	1.05978	6.17647	1.27602	4.53846	1.81617	7.15385	1.28662	2.83019	1.2517	6.0566	1.45991	4.46154	1.85969	7.34615	0.845804	2.44	1.08321	6.04	1.45717	4.21429	1.42389
601	胡搅蛮缠	Importune	negative	2.26214	0.91781	6.90291	1.10715	4.8913	2.11059	7.52174	0.960072	2.19608	0.916943	6.7451	1.14618	5.90909	1.68775	7.31818	0.893701	2.32692	0.922936	7.05769	1.05558	3.95833	2.05319	7.70833	0.999094	2.15385	0.977885	7.01923	1.14601	4.82609	2.2085	7.65217	0.982052	2.37255	0.847603	6.78431	1.06421	4.95652	2.05555	7.3913	0.940944	2.14815	1.06351	6.85185	1.09908	5.58333	2.15146
602	虎踞龙盘	A forbidding strategic point	neutral	5.68932	1.40747	5.95146	1.33121	3.72549	1.74446	6.05882	2.0534	6.13208	1.40107	6.18868	1.33094	3.55556	1.82574	6.22222	2.04438	5.22	1.26636	5.7	1.29756	3.91667	1.66594	5.875	2.09165	5.84	1.21823	5.84	1.16689	4.15385	2.05314	5.5	2.45357	5.54717	1.5636	6.0566	1.47303	3.28	1.24231	6.64	1.35031	6.42308	1.02657	6.15385	0.967153	4	2.11224
603	虎口拔牙	To pull a tooth from the tiger’s mouth	neutral	4.57547	1.76175	6.51887	1.47507	4.36	2.01788	6.82	1.5345	5.15094	1.85427	6.11321	1.62505	4.84	2.13464	6.36	1.62993	4	1.4676	6.92453	1.19049	3.88	1.81016	7.28	1.30767	4.11765	1.583	6.7451	1.24649	4.2	2.06155	6.88	1.78699	5	1.82574	6.30909	1.64286	4.52	2.0025	6.76	1.26754	4.6	1.97906	6.44	1.44568	4.92308	2.28989
604	虎口余生	Escaped from death	neutral	5.93478	1.69184	6.78261	1.67216	3.34694	1.67768	6.91837	1.48376	6.17391	1.85011	6.52174	1.97414	3.04167	1.45898	6.75	0.944089	5.69565	1.52061	7.04348	1.29609	3.64	1.84572	7.08	1.86905	5.81818	1.96726	6.68182	1.75625	3.13043	1.48643	7.13043	1.09977	6.04167	1.42887	6.875	1.62354	3.53846	1.83806	6.73077	1.75631	6.3	2.00278	6.6	2.22111	2.72727	1.3484
605	虎落平阳	It was as though a tiger left his hills and descended to the plains	negative	3.48936	1.36529	5.93617	1.25809	3.71429	1.84842	6.65306	1.92084	3.95652	1.49174	5.69565	1.29456	3.70833	1.60106	6.33333	1.57885	3.04167	1.08264	6.16667	1.20386	3.72	2.09205	6.96	2.18861	3.5	1.43925	5.90909	1.4445	3.875	1.91816	6.70833	1.78104	3.48	1.32665	5.96	1.09848	3.56	1.80462	6.6	2.08167	3.9	1.59513	5.6	1.57762	3.58333	1.78164
606	虎视眈眈	Look at fiercely as a tiger does	negative	3.54762	1.20646	6.27381	1.17557	4.17021	2.02505	7	1.588	3.43478	1.25879	5.95652	1.29883	4.20833	2.22592	6.54167	1.97768	3.68421	1.14148	6.65789	0.87846	4.13043	1.84155	7.47826	0.845822	3.35135	1.29564	6.37838	1.03686	3.66667	1.90347	6.79167	2.04257	3.70213	1.12124	6.19149	1.27924	4.69565	2.05459	7.21739	0.902347	3.40909	1.46902	6.31818	1.17053	3.92308	2.39658
607	虎头虎脑	Looking dignified and strong	neutral	5.68224	1.46402	5.60748	1.50319	5.26	1.52275	6.94	1.54405	5.92453	1.238	5.90566	1.25979	4.76	1.56205	7.04	0.978093	5.44444	1.63299	5.31481	1.66908	5.76	1.33167	6.84	1.97231	5.81818	1.37559	5.54545	1.47596	5.58333	1.71735	7.29167	0.954585	5.53846	1.5525	5.67308	1.54312	4.96154	1.28002	6.61538	1.89899	6.17857	1.27812	5.85714	1.55669	4.91667	2.02073
608	互帮互学	Mutual help and mutual study	positive	6.6383	1.00921	5.29787	1.92145	6.43137	1.48667	7.41176	1.02326	6.54167	1.10253	5.58333	1.90917	5.88462	1.75104	7.26923	0.961569	6.73913	0.915393	5	1.93061	7	0.866025	7.56	1.08321	7	0.755929	4.95455	2.1039	6.32	1.57374	7.52	1.00499	6.32	1.10755	5.6	1.73205	6.53846	1.42073	7.30769	1.04954	7	0.632456	5.09091	2.21154	5.69231	1.79743
609	互帮互助	Mutual help and mutual assistance	positive	6.97087	1.08877	5.75728	1.74033	6.54167	1.74987	7.625	1.06441	7.04	1.12413	6.36	1.56179	6.125	1.87228	7.33333	0.868115	6.90566	1.06092	5.18868	1.72154	6.95833	1.5458	7.91667	1.17646	7.11321	1.17113	5.90566	1.63218	6.45833	1.7932	7.75	1.07339	6.82	0.98333	5.6	1.85164	6.625	1.73988	7.5	1.06322	7.30769	1.19228	6.19231	1.85514	5.91667	2.06522
610	互为依存	Interdependence	neutral	5.97826	1.02174	5.36957	1.73024	5.38776	1.8576	6.83673	1.23063	6.08696	1.16436	5.3913	1.72519	5.58333	1.83958	6.70833	1.26763	5.86957	0.868873	5.34783	1.77377	5.2	1.89297	6.96	1.20692	5.90476	0.995227	5.14286	1.52597	5.30435	2.00986	6.82609	1.33662	6.04	1.05987	5.56	1.89473	5.46154	1.74885	6.84615	1.15559	6.2	1.22927	5.3	1.63639	5.18182	2.22792
611	花繁叶茂	Flourished flowers	positive	6.79439	1.07929	5.72897	1.80967	5.06122	1.98335	7.30612	1.08405	6.85185	1.25002	5.85185	2.13159	4.04167	1.96666	6.91667	1.1389	6.73585	0.880361	5.60377	1.41882	6.04	1.45717	7.68	0.9	6.98148	1.09011	5.83333	1.75639	4.78261	2.08799	7.52174	1.20112	6.60377	1.04402	5.62264	1.87315	5.30769	1.8925	7.11538	0.951921	6.85185	1.35032	6.14815	1.97491	3.45455	1.86353
612	花好月圆	Booming flowers and a full moon	positive	7.17925	1.13639	5.68868	2.03944	4.82979	2.30613	7.46809	0.996757	7.25	1.10036	6	2.13284	3.30435	1.79481	7.17391	0.984063	7.11111	1.17629	5.38889	1.91732	6.29167	1.73153	7.75	0.944089	7.43137	1.02479	5.58824	2.08975	5	2.15322	7.65217	0.982052	6.94545	1.19285	5.78182	2.00639	4.66667	2.4789	7.29167	0.999094	7.41667	1.01795	5.875	2.19312	3.45455	1.63485
613	花红柳绿	The appearance of a bright spring	positive	6.11429	1.4956	5.68571	1.48268	4.4	1.61624	7.06	1.34635	6.31481	1.43834	5.88889	1.57416	4.16	1.8412	7.16	1.1431	5.90196	1.53954	5.47059	1.36166	4.64	1.35031	6.96	1.54056	6.43396	1.20111	5.66038	1.39977	4.20833	1.61458	6.95833	1.65448	5.78846	1.69586	5.71154	1.576	4.57692	1.62906	7.15385	1.00766	6.64286	1.16155	6.07143	1.56178	3.41667	1.72986
614	花花草草	Flowers and grass	neutral	5.6729	0.887818	4.60748	1.65265	5.14	1.94842	7.42	1.27919	5.56604	0.888158	5.07547	1.43914	4.5	1.67929	7.11538	1.3062	5.77778	0.883105	4.14815	1.73104	5.83333	2.01444	7.75	1.18872	5.81132	0.941697	4.62264	1.65514	5.08	2.17792	7.6	1.1547	5.53704	0.817566	4.59259	1.66562	5.2	1.73205	7.24	1.39284	5.80769	0.980581	5.11538	1.53172	4	1.87083
615	花花肠子	Cunning	negative	2.93617	1.42041	6	1.588	5.06122	1.23167	6.63265	1.4244	2.86957	1.14035	5.43478	1.59049	5.2	1.22474	6.52	1.32665	3	1.66812	6.54167	1.41357	4.91667	1.24819	6.75	1.53934	2.54545	1.22386	6.31818	1.615	4.875	1.191	6.83333	1.34056	3.28	1.51438	5.72	1.54164	5.24	1.26754	6.44	1.50222	2.5	1.2693	5.8	1.68655	4.84615	1.46322
616	花甲老人	Old people	neutral	5.12766	0.849988	4.38298	1.81244	4.26	1.92524	7.74	0.985818	5.16667	0.963087	5.08333	1.05981	4	2.19848	8	0.866025	5.08696	0.733178	3.65217	2.14495	4.52	1.61038	7.48	1.04563	5	1	4.44	2.00167	4.36	2.34307	7.96	1.0198	5.27273	0.631085	4.31818	1.615	4.16	1.43411	7.52	0.918332	5.15385	1.14354	4.92308	1.03775	4	2.54951
617	花香鸟语	Birds sing and flowers give forth fragrance	positive	7.18367	1.20197	5.61224	2.06979	4.70833	1.94563	7.66667	1.01758	7.2	1.25831	6.16	2.07525	4.04348	1.98811	7.52174	0.845822	7.16667	1.16718	5.04167	1.94443	5.32	1.7253	7.8	1.1547	7.2	1.25831	5.76	2.00582	4.29167	1.80529	7.875	0.740887	7.16667	1.16718	5.45833	2.16653	5.125	2.02833	7.45833	1.21509	6.92308	1.49786	6.84615	1.67562	3.75	2.00567
618	花香四溢	Diffusing of the scent of flowers	positive	7.10638	1.27235	5.95745	2.01038	4.88	2.0863	7.46	0.952119	7.3913	1.3052	6.21739	2.19414	3.85185	1.85439	7.11111	0.9337	6.83333	1.20386	5.70833	1.82921	6.08696	1.67639	7.86957	0.814881	7.18182	1.33225	5.13636	2.09978	4.88462	2.06547	7.46154	1.1395	7.04	1.24097	6.68	1.65126	4.875	2.15311	7.45833	0.72106	7.4	1.3499	5.5	2.50555	4.14286	2.0702
619	哗哗啦啦	Clatter	neutral	4.79808	0.989065	5.20192	1.0463	5.17021	1.04921	6.31915	1.68247	4.73077	0.888166	5.21154	0.536384	5	1	6.3913	1.19617	4.86538	1.08517	5.19231	1.38675	5.33333	1.09014	6.25	2.06945	4.75472	0.978729	5.18868	1.00109	5	0.872872	6.31818	1.80967	4.84314	1.00742	5.21569	1.10116	5.32	1.1804	6.32	1.6	4.67857	1.12393	5.35714	0.558721	5	1.26491
620	哗众取宠	Curry favour by claptrap	negative	2.98	1.01484	6.13	1.03138	5.3	1.87628	7.32	1.23619	3.13725	1.02019	6.01961	1.12232	5.44	1.58325	6.92	1.28841	2.81633	0.993174	6.2449	0.924901	5.16	2.15407	7.72	1.06145	2.92453	1.141	6.16981	1.13909	5.08333	2.01983	7.25	1.48177	3.04255	0.85865	6.08511	0.904813	5.5	1.74929	7.38462	0.982931	3.14815	1.13353	6.07407	1.10683	5	2.04495
621	化公为私	Turn public property into private property	negative	3.00971	1.5307	6.45631	1.2893	5.48936	1.70514	6.57447	1.76616	2.58	1.34149	6.62	1.2436	6.09091	1.37699	7.04545	1.13294	3.41509	1.59848	6.30189	1.32411	4.96	1.81384	6.16	2.11503	2.8	1.42857	6.34	1.25536	5.48	1.61038	6.72	1.54164	3.20755	1.60957	6.56604	1.32301	5.5	1.8452	6.40909	2.01563	2.625	1.55515	6.41667	1.17646	5.76923	1.58923
622	化害为利	Turn harm to benefit	positive	6.62626	0.864089	6.0101	1.27371	6.09804	2.00255	7.09804	1.5265	6.55319	0.716529	6	1.26834	5.51852	2.19037	6.96296	1.40004	6.69231	0.980965	6.01923	1.29085	6.75	1.56733	7.25	1.67462	6.70588	1.02556	6.21569	1.11917	6.11538	2.04601	7.07692	1.54721	6.54167	0.650968	5.79167	1.39845	6.08	1.99833	7.12	1.53623	6.52	0.822598	6.28	0.842615	5.35714	2.34052
623	画饼充饥	Feed on illusions	negative	3.63636	1.1016	5.72727	1.16865	5.25	1.88778	7.17308	1.30941	3.68182	1.17053	5.22727	1.19251	4.85185	1.72546	6.85185	1.53682	3.59091	1.05375	6.22727	0.922307	5.68	1.99416	7.52	0.918332	3.80952	1.20909	5.71429	0.783764	5.26923	1.92993	7.15385	1.66595	3.47826	0.994053	5.73913	1.45282	5.23077	1.88271	7.19231	0.849434	3.63636	1.36182	5.63636	1.02691	5.14286	1.9945
624	画蛇添足	Paint a snake with feet -- superfluous	negative	3.32653	1.16168	5.71429	1.36931	5.61224	1.68098	7.36735	0.993602	3.2	1.29099	6.12	1.1299	5.66667	1.8098	7.20833	1.17877	3.45833	1.02062	5.29167	1.48848	5.56	1.58325	7.52	0.770281	3.28	0.890693	5.88	1.48099	5.52174	2.01967	7.43478	0.843482	3.375	1.40844	5.54167	1.25036	5.69231	1.34964	7.30769	1.12318	2.92308	0.862316	6.30769	1.31559	5.63636	2.37793
625	画中有诗	There is poetry in a painting	positive	6.79592	1.32255	5.44898	2.05204	4.7	1.58114	7	1.48461	6.88	1.39403	6.24	1.78606	3.96	1.56738	7.08	0.909212	6.70833	1.26763	4.625	2.01759	5.44	1.22746	6.92	1.91311	6.92	1.28841	5.56	2.12289	4.68	1.65126	7.28	1.30767	6.66667	1.37261	5.33333	2.01444	4.72	1.54164	6.72	1.6207	6.69231	1.6525	6.92308	1.18754	3.92308	1.70595
626	话里带刺	Sting words	negative	2.82075	1.16126	6.43396	1.23457	4.91489	2.06239	7.08511	1.21279	3.09615	1.37569	6.17308	1.21625	5	2.13201	6.65217	1.26522	2.55556	0.839287	6.68519	1.2104	4.83333	2.03591	7.5	1.02151	2.62264	1.02331	6.43396	1.16865	4.82609	2.22899	7.04348	1.46095	3.01887	1.26325	6.43396	1.3084	5	1.93368	7.125	0.946963	2.76923	1.10662	6.07692	1.05539	4.81818	2.56196
627	欢呼雀跃	As cheerful as a lark	positive	6.94393	1.21959	6.82243	1.17211	5.97917	1.76839	7.58333	0.89522	7.01887	1.27838	6.96226	1.20834	5.43478	1.77933	7.26087	0.751809	6.87037	1.16629	6.68519	1.12977	6.48	1.63605	7.88	0.927362	7.30909	1.23037	7.16364	1.08463	6.13043	1.89027	7.56522	0.895752	6.55769	1.0921	6.46154	1.16251	5.84	1.67531	7.6	0.912871	7.57143	1.19965	7.53571	0.999338	5.27273	2.05382
628	欢喜冤家	Quarrelsome lovers	neutral	5.82178	1.25217	5.78218	1.23777	5.26	1.32187	6.9	1.41782	5.28571	0.978945	5.42857	1.08012	5.36	1.31909	6.72	1.06145	6.32692	1.27911	6.11538	1.29333	5.16	1.34412	7.08	1.70587	6.08333	1.21748	5.85417	1.05164	5.36	1.22066	7.04	1.39881	5.58491	1.24706	5.71698	1.39197	5.16	1.43411	6.76	1.45144	5.56522	1.12112	5.43478	1.12112	5.61538	1.38675
629	欢欣雀跃	Exultation and joy	positive	7.1875	1.28255	6.70833	1.51529	6.02083	1.7923	7.25	1.176	7.20833	1.10253	6.45833	1.84106	5.47826	1.97414	6.6087	1.11759	7.16667	1.46456	6.95833	1.08264	6.52	1.47535	7.84	0.898146	7.30435	1.22232	6.78261	1.44463	6	1.85864	7.13043	1.35862	7.08	1.35154	6.64	1.60416	6.04	1.7673	7.36	0.994987	7.18182	1.07872	6.45455	1.69491	5.27273	2.28433
630	欢欣若狂	Delightful	positive	7.26214	1.32073	6.83495	1.73825	6.29167	1.87887	7.5	0.850532	7.11538	1.3813	6.67308	1.93747	5.625	2.20301	7.54167	0.883627	7.41176	1.25182	7	1.50997	6.95833	1.19707	7.45833	0.832971	7.22	1.51577	7.04	1.51132	6.36364	1.89097	7.5	0.740013	7.30189	1.11949	6.64151	1.92248	6.23077	1.90384	7.5	0.948683	7.125	1.42379	7	1.69398	5.54545	2.33939
631	缓急轻重	In order of importance and urgency	neutral	5.30097	0.83824	5.00971	1.29475	5.79592	1.80254	7.16327	1.02768	5.39216	0.665686	5.11765	1.08898	5.83333	1.83366	7.125	0.797414	5.21154	0.976921	4.90385	1.47209	5.76	1.80924	7.2	1.22474	5.16327	0.589736	4.93878	1.29756	5.75	1.70038	6.875	1.1156	5.42593	1.00192	5.07407	1.30097	5.84	1.92959	7.44	0.869866	5.13043	0.457697	5.21739	0.671262	5.66667	2.01509
632	换位思考	Transpositional consideration	neutral	5.95556	1.0435	4.55556	1.35773	6.1875	1.92029	7.72917	0.892989	5.82609	1.23038	4.86957	1.39167	5.6087	2.18963	7.34783	0.71406	6.09091	0.811177	4.22727	1.26986	6.72	1.48661	8.08	0.909212	5.85714	0.963624	4.61905	1.46548	5.86957	2.02943	7.73913	0.963771	6.04167	1.12208	4.5	1.28537	6.48	1.80555	7.72	0.842615	5.45455	0.934199	5.18182	1.07872	5.09091	2.54773
633	荒郊野外	Wilderness	negative	3.65957	1.23845	5.14894	1.68082	3.8125	1.57988	7.1875	1.28255	3.52	1.15902	5.08	1.6052	3.6087	1.67167	6.95652	1.06508	3.81818	1.33225	5.22727	1.79767	4	1.5	7.4	1.44338	3.79167	1.444	5.16667	1.8098	4.125	1.62354	7.125	1.22696	3.52174	0.994053	5.13043	1.5755	3.5	1.50362	7.25	1.35935	3.61538	1.26085	5.23077	1.73944	4.33333	1.87487
634	慌手慌脚	Blunder against	negative	3.15909	0.986966	6.06818	1.22755	4.875	1.87509	7.08333	1.0883	3.36364	1.0486	5.68182	1.21052	5.34783	1.94489	6.95652	1.06508	2.95455	0.898532	6.45455	1.1434	4.44	1.73397	7.2	1.11803	3.13043	1.17954	6.26087	1.21421	4.82609	2.08135	7.17391	1.07247	3.19048	0.749603	5.85714	1.23635	4.92	1.70587	7	1.11803	3.25	1.3568	5.91667	0.996205	5.45455	2.11488
635	黄花闺女	Virgin	neutral	5.82979	1.2036	5.04255	1.81728	5.21739	1.53352	7.06522	1.23652	5.625	0.923721	4.875	1.454	4.59091	1.05375	6.63636	1.1358	6.04348	1.4295	5.21739	2.1523	5.79167	1.69344	7.45833	1.21509	5.41667	0.775532	4.70833	1.85283	5.47826	1.53355	7.26087	1.42118	6.26087	1.42118	5.3913	1.75134	4.95652	1.52191	6.86957	1.01374	5.46154	0.660225	4.69231	1.79743	4.63636	1.28629
636	惶然不安	Uneasy	negative	3.27083	1.16216	6.16667	1.41922	4.39583	2.08071	6.54167	1.51529	3.12	1.05357	6.24	1.3626	4.29167	1.98865	6.33333	1.20386	3.43478	1.27301	6.08696	1.50493	4.5	2.20671	6.75	1.77544	3.16667	0.963087	6.5	1.14208	4.21739	2.43005	6.78261	1.27766	3.375	1.34528	5.83333	1.60615	4.56	1.73397	6.32	1.70098	3.23077	0.926809	6.23077	1.36344	4	2.3741
637	晃晃荡荡	Sticky	negative	3.97917	1.13905	4.89583	1.24182	5.28571	1.55456	6.93878	1.23167	3.8	1.22474	4.88	1.33292	5.36	1.55134	6.64	1.43991	4.17391	1.02922	4.91304	1.16436	5.20833	1.58743	7.25	0.896854	3.875	1.36135	4.625	1.1726	5.32	1.54704	6.88	1.30128	4.08333	0.880547	5.16667	1.27404	5.25	1.59483	7	1.17954	3.84615	1.57301	4.61538	1.38675	5.30769	1.75046
638	晃晃悠悠	Wobbly	negative	3.95745	1.14127	4.90426	1.24078	5.5	1.45865	7.1875	0.95997	3.79167	1.31807	5.125	1.03472	5.3913	1.3052	6.82609	0.777652	4.13043	0.919701	4.67391	1.41107	5.6	1.60728	7.52	1.00499	4.21739	1.20441	4.8913	1.29647	5.34783	1.30065	7.13043	1.05763	3.70833	1.0417	4.91667	1.21285	5.64	1.60416	7.24	0.879394	4.08333	1.50504	5.16667	0.717741	5.36364	1.36182
639	灰头土脸	To describe depression	negative	3.2	0.894427	5.15556	1.24235	4.64583	1.60438	6.875	1.16006	3.2381	0.830949	5.28571	1.14642	4.5	1.7693	6.41667	1.1389	3.16667	0.963087	5.04167	1.33447	4.79167	1.444	7.33333	1.00722	3.26087	0.915393	5.04348	1.06508	4.625	1.68916	6.875	1.22696	3.13636	0.888844	5.27273	1.42032	4.66667	1.55106	6.875	1.1156	3.27273	0.904534	5.36364	0.6742	4.5	2.06706
640	挥师北上	Command an army to march north	neutral	5.89583	0.92804	5.95833	1.33621	4.91489	2.50069	6.89362	1.37104	5.96154	1.07632	5.84615	1.34736	4.47826	2.71142	7	1.16775	5.81818	0.732664	6.09091	1.34196	5.33333	2.25864	6.79167	1.5598	5.91667	1.01795	6.04167	0.858673	4.86957	2.80104	6.91304	1.37883	5.875	0.850192	5.875	1.70198	4.95833	2.23566	6.875	1.39292	5.92857	1.14114	6.21429	0.974961	4.27273	3.34936
641	回归故里	Return to one's homeland	positive	6.68571	1.25049	6.35238	1.7866	5.62	2.03931	7.4	0.832993	6.71154	1.2732	6.55769	1.76472	5.24	2.08726	7.32	0.852447	6.66038	1.23947	6.15094	1.80167	6	1.95789	7.48	0.822598	6.94118	1.17323	6.43137	1.85747	5.58333	2.18526	7.45833	0.72106	6.44444	1.28367	6.27778	1.73114	5.65385	1.93788	7.34615	0.93562	7.08333	1.1389	6.91667	1.63964	5.5	2.46798
642	回归故土	Return to homeland	positive	6.67391	1.26587	6.06522	1.90207	5.44681	2.07268	7.17021	1.14814	6.5	0.963624	5.77273	1.77098	5.17391	1.89862	6.78261	1.16605	6.83333	1.49395	6.33333	2.01444	5.70833	2.23566	7.54167	1.02062	6.47826	1.44189	5.95652	2.09931	5.56522	1.97314	7.43478	1.27301	6.86957	1.05763	6.17391	1.7229	5.33333	2.20013	6.91667	0.974308	6.63636	1.28629	6.27273	2.05382	5.54545	1.86353
643	回过味来	Finally realize	neutral	5.46512	0.959882	5.51163	1.09918	5.5	1.50177	6.9375	1.35907	5.61905	1.16087	5.61905	1.11697	5.21739	1.44463	6.6087	1.37309	5.31818	0.716231	5.40909	1.09801	5.76	1.53514	7.24	1.3	5.25	1.16416	5.4	1.35336	5.26087	1.48377	7.13043	1.51671	5.65217	0.71406	5.6087	0.838783	5.72	1.51438	6.76	1.2	5.55556	1.5899	5.66667	1.41421	5.09091	1.6404
644	悔不当初	Regret having done sth.	negative	3.5102	1.04328	5.97959	1.50679	4.34694	1.77425	7.16327	1.14286	3.68	1.14455	5.84	1.65025	5.12	1.42361	6.76	1.16476	3.33333	0.916831	6.125	1.36135	3.54167	1.76879	7.58333	0.974308	3.5	0.989949	6.15385	1.61722	4.28	1.64621	7.16	1.37477	3.52174	1.12288	5.78261	1.38027	4.41667	1.93181	7.16667	0.868115	3.64286	1.08182	6.14286	1.56191	5.07692	1.65638
645	悔恨交加	Mixed feelings of remorse and shame	negative	3.37864	1.48929	6.48544	1.12776	4.6	1.95876	7.18	1.15511	3.78	1.54246	6.24	1.20475	5.16	1.81842	6.72	1.13725	3	1.3445	6.71698	1.00723	4.04	1.96808	7.64	0.994987	3.30769	1.48902	6.65385	1.10053	4.2	1.89297	7.32	1.02956	3.45098	1.50085	6.31373	1.14	5	1.97906	7.04	1.2741	3.73077	1.73338	6.46154	1.1395	5.07692	2.17798
646	汇编语言	Assembly language	neutral	5.04348	0.556038	3.91304	1.77421	5.68	1.73134	6.9	1.34392	5.08333	0.717282	4.375	1.63687	5.12	1.83303	6.84	1.06771	5	0.308607	3.40909	1.81683	6.24	1.45144	6.96	1.59374	5	0	3.72727	2.02794	5.58333	1.55806	6.875	1.1156	5.08333	0.775532	4.08333	1.5299	5.76923	1.90384	6.92308	1.54721	5	0	4.36364	2.01359	5.16667	1.40346
647	慧眼独具	Can see what others cannot	positive	6.57692	1.10333	6.07692	1.32703	5.76	1.6233	6.98	1.46371	6.39216	1.23415	6.27451	1.16753	5.4	1.70783	6.6	1.60728	6.75472	0.938609	5.88679	1.44994	6.12	1.48099	7.36	1.22066	6.5098	1.08393	6.03922	1.19935	5.64	1.62993	6.76	1.76257	6.64151	1.12821	6.11321	1.44994	5.88	1.64114	7.2	1.08012	6.24	1.33167	6.36	0.994987	5.15385	2.03495
648	昏昏沉沉	Have dizzy spells	negative	3.33333	1.34217	4.77083	1.41781	4.71154	1.66081	7.11538	1.00301	3.25	1.25974	4.70833	1.26763	4.77778	1.47631	6.88889	1.1209	3.41667	1.44212	4.83333	1.57885	4.64	1.86815	7.36	0.81035	3	1.08711	4.82609	1.6693	4.73077	1.53773	6.96154	1.11286	3.64	1.49666	4.72	1.17331	4.69231	1.80597	7.26923	0.874423	3	1.18322	4.72727	1.48936	4.71429	1.43734
649	昏昏迷迷	Obsessed with dizzy	negative	3.61702	1.27779	4.91489	1.51557	4.21569	1.46032	7.2549	0.976589	3.54167	1.10253	5.20833	1.02062	4.51852	1.55342	7.25926	0.902671	3.69565	1.4596	4.6087	1.87663	3.875	1.2959	7.25	1.07339	3.29167	1.39811	4.91667	1.6129	4.04	1.3687	7.32	1.06927	3.95652	1.06508	4.91304	1.44326	4.38462	1.55118	7.19231	0.895287	3.61538	1.19293	5	1	4.38462	1.55662
650	昏昏欲睡	Feel sleepy	negative	3.79167	1.14777	4.60417	1.72268	4.26	1.86055	7.44	1.0721	3.75	1.22474	4.75	1.72576	5.48	1.47535	6.92	1.07703	3.83333	1.09014	4.45833	1.74404	3.04	1.33791	7.96	0.789515	3.95833	0.954585	4.83333	1.63299	4.54167	1.86452	7.54167	1.06237	3.625	1.31256	4.375	1.8133	4	1.85472	7.34615	1.09334	3.91667	0.996205	5	1.53741	5.83333	1.40346
651	昏头转向	Dizzy turn	negative	3.4434	1.00551	5.61792	1.23356	3.78723	1.3341	7.06383	1.22304	3.30909	1.10341	5.61818	1.22461	3.95652	1.29609	6.82609	0.984063	3.58824	0.875819	5.61765	1.25534	3.625	1.37722	7.29167	1.39811	3.58491	1.04576	5.48113	1.17654	3.68182	1.08612	6.90909	1.15095	3.30189	0.952424	5.75472	1.28461	3.88	1.53623	7.2	1.29099	3.32143	1.09048	5.82143	0.983327	3.72727	1.42063
652	婚丧嫁娶	Marriage and funeral	neutral	4.52174	1.04858	4.8913	1.28631	4.4375	2.12289	6.97917	1.55042	5	0.301511	5.04348	0.705708	4	2.06419	7	1.14208	4.04348	1.29609	4.73913	1.68462	4.875	2.13282	6.95833	1.89918	4.43478	1.12112	4.69565	1.39593	4.875	2.25181	7.29167	1.19707	4.6087	0.988071	5.08696	1.16436	4	1.93368	6.66667	1.8098	5	0	5.08333	0.900337	4.5	2.43086
653	浑身是胆	Full of courage	positive	6.51064	1.21355	6.68085	1.40041	5.47917	2.13372	7.22917	1.53317	6.78261	1.20441	6.73913	1.5141	5.4	2	7.28	1.72047	6.25	1.18872	6.625	1.31256	5.56522	2.31254	7.17391	1.33662	6.77273	1.15189	6.59091	1.59341	5.86957	1.98413	7.30435	1.74342	6.28	1.24231	6.76	1.23423	5.12	2.24202	7.16	1.34412	7.2	0.918937	6.9	1.52388	5.84615	1.81871
654	混混沌沌	Chaos	negative	3.44898	1.17369	5.38776	1.53862	4.45833	1.70054	6.5625	1.35122	3.52	1.26227	5.68	1.31403	4.30435	1.52061	6.47826	0.845822	3.375	1.09594	5.08333	1.71735	4.6	1.87083	6.64	1.70489	3.28	1.1	5.64	1.55134	3.91667	1.38051	6.33333	1.52277	3.625	1.24455	5.125	1.51263	5	1.84155	6.79167	1.14129	3.23077	1.30089	5.92308	1.11516	3.91667	1.72986
655	活龙活现	Lifelike	positive	6.40367	1.03744	5.88073	1.46392	5.31373	1.67917	6.56863	1.60318	6.32727	0.982336	5.96364	1.42678	4.88462	1.84015	6.76923	1.24283	6.48148	1.09442	5.7963	1.50946	5.76	1.39284	6.36	1.91224	6.36364	1.11162	6.01818	1.4336	5.48	1.63605	6.64	1.55134	6.44444	0.964789	5.74074	1.49446	5.15385	1.73649	6.5	1.67929	6.25	1.07583	6.42857	1.19965	5	1.82574
656	火烧眉毛	Extremely urgent	negative	3.31915	1.49064	7.14894	1.31841	3.78	1.89833	7.34	1.1537	3.13043	1.68696	7	1.3817	3.92593	1.73041	7.03704	1.25519	3.5	1.28537	7.29167	1.26763	3.6087	2.10495	7.69565	0.926125	2.86957	1.05763	7.17391	1.26678	3.56	1.55671	7.2	1.47196	3.75	1.72576	7.125	1.39292	4	2.19848	7.48	0.714143	2.54545	1.03573	6.90909	1.446	4.14286	1.79131
657	货柜码头	Container terminal	neutral	5	0	4.53488	1.24114	4.57447	1.55682	6.23404	1.64466	5	0	4.59091	1.2596	4.26087	1.28691	5.86957	1.32474	5	0	4.47619	1.24976	4.875	1.75233	6.58333	1.86307	5	0	4.59091	1.33306	4.63636	0.953463	6	1.71825	5	0	4.47619	1.16701	4.52	1.96044	6.44	1.58325	5	0	4.18182	1.72152	4.27273	1.27208
658	货真价实	Genuine goods at a fair price	positive	6.75701	1.13969	5.65421	1.67164	5.2449	1.71429	7.28571	1.1547	6.81132	1.1445	5.64151	1.77693	4.5	1.74456	7.25	0.84699	6.7037	1.14314	5.66667	1.57815	5.96	1.3687	7.32	1.40594	6.86538	1.17204	5.65385	1.60739	5.17391	1.74908	7.56522	0.945135	6.65455	1.10919	5.65455	1.74503	5.30769	1.71509	7.03846	1.28002	6.72	1.24231	5.68	1.62583	4.54545	2.11488
659	获益匪浅	Benefit a lot	positive	6.7234	1.22833	6.25532	1.42139	5.54167	1.86751	7.58333	0.963887	6.8	1.22474	6.36	1.65529	4.95652	1.84584	7.30435	0.926125	6.63636	1.25529	6.13636	1.12527	6.08	1.75404	7.84	0.943398	6.95833	1.0417	6.66667	1.20386	5.47826	1.80579	7.91304	1.08347	6.47826	1.3774	5.82609	1.52709	5.6	1.95789	7.28	0.737111	7.21429	1.0509	7.14286	1.09945	4.90909	2.16585
660	祸从口出	Curse from the mouth	negative	3.04545	1.25669	6.29545	1.33955	4.89362	2.26729	7.38298	1.01195	3.2381	1.33809	5.90476	1.44585	5.21739	2.17332	7.08696	0.900154	2.86957	1.17954	6.65217	1.15242	4.58333	2.35753	7.66667	1.0495	3.13043	1.42396	6.26087	1.28691	4.78261	2.43005	7.34783	1.19121	2.95238	1.07127	6.33333	1.42595	5	2.14679	7.41667	0.829702	2.91667	1.56428	6	1.41421	4.45455	2.29624
661	祸从天降	Disaster comes	negative	2.21154	0.982103	6.92308	1.3488	2.85106	2.07447	6.97872	1.72563	2.07843	1.05533	6.98039	1.61852	2.65217	2.01379	6.3913	1.99406	2.33962	0.897505	6.86792	1.03845	3.04167	2.15647	7.54167	1.21509	2.04	1.02936	7.18	1.17265	2.25	1.48177	6.66667	2.099	2.37037	0.917262	6.68519	1.46434	3.47826	2.42842	7.30435	1.18455	1.75	0.944089	7.45833	1.10253	1.91667	1.44338
662	祸福无门	If either comes	neutral	4.56522	1.18607	5.21739	1.44396	3.51064	1.42756	5.89362	1.90233	4.43478	1.27301	5.26087	1.09617	3.73913	1.60163	5.69565	1.55021	4.69565	1.10514	5.17391	1.74908	3.29167	1.23285	6.08333	2.20507	4.34783	1.26522	5.30435	1.49042	3.82609	1.6693	6	2	4.78261	1.0853	5.13043	1.42396	3.20833	1.10253	5.79167	1.84106	4.36364	1.36182	5.63636	1.02691	4	1.94936
663	机敏过人	Be more alert and resourceful than others	positive	6.97826	1.29081	6.32609	1.8264	5.45098	1.99313	6.98039	1.15741	7.13636	1.4895	6.77273	1.95014	4.42308	1.8368	7.07692	0.89098	6.83333	1.09014	5.91667	1.63964	6.52	1.55778	6.88	1.39403	6.91667	1.55806	6.58333	1.66594	5.4	2.04124	7.04	1.05987	7.04545	0.950051	6.04545	1.98752	5.5	1.98494	6.92308	1.26248	6.91667	1.88092	6.75	2.00567	4.53846	1.89804
664	鸡飞蛋打	Dead loss	negative	3.06667	1.05313	6.13333	1.60397	4.71429	1.77951	6.91837	1.28836	3	1.1547	5.81818	1.81623	4.72	1.54164	6.8	1.08012	3.13043	0.967863	6.43478	1.34252	4.70833	2.0319	7.04167	1.48848	2.90476	1.17918	6.14286	1.71131	4.6	1.77951	7.08	1.25565	3.20833	0.931533	6.125	1.5411	4.83333	1.8098	6.75	1.32698	2.77778	1.30171	5.77778	1.92209	4.84615	1.62512
665	鸡飞狗跳	General turmoil	negative	2.87234	1.05536	6.42553	1.49992	4.28571	1.56791	7.12245	1.12976	2.5	1.10335	6.33333	1.63299	3.79167	1.47381	6.625	1.09594	3.26087	0.864312	6.52174	1.3774	4.76	1.53514	7.6	0.957427	2.375	0.875388	6.83333	1.40393	3.82609	1.15413	7.21739	1.38027	3.3913	0.988071	6	1.50756	4.69231	1.78369	7.03846	0.870897	1.91667	0.668558	7.08333	1.08362	3.36364	1.36182
666	鸡零狗碎	Bits and pieces	negative	3.28571	1.13652	5.69388	1.32609	4.875	1.19618	6.29167	1.52927	3.28	1.17331	5.96	1.24097	4.79167	1.02062	5.66667	1.46456	3.29167	1.12208	5.41667	1.38051	4.95833	1.36666	6.91667	1.34864	3.15385	1.15559	5.69231	1.34964	4.95652	1.22394	6.30435	1.49042	3.43478	1.12112	5.69565	1.32921	4.8	1.19024	6.28	1.59478	3.07143	1.07161	6.28571	1.13873	4.54545	1.36848
667	鸡毛掸子	Feather duster	neutral	4.73913	0.534781	4.65217	1.52341	5.79592	2.16967	7.40816	1.20621	5	0	4.54545	1.22386	4.44	1.50222	6.96	1.20692	4.5	0.65938	4.75	1.77544	7.20833	1.84106	7.875	1.03472	4.70833	0.624094	4.20833	1.74404	5.8	2.21736	7.44	1.35647	4.77273	0.428932	5.13636	1.08213	5.79167	2.16653	7.375	1.05552	5	0	4.16667	1.58592	4.38462	1.44559
668	鸡鸣狗盗	Crow like a cock and snatch like a dog	negative	2.70455	0.954294	6.34091	1.41328	4.80392	1.41449	6.54902	1.7699	2.56522	1.12112	6.26087	1.42118	4.76923	1.65669	6.07692	1.80938	2.85714	0.727029	6.42857	1.43427	4.84	1.1431	7.04	1.61967	2.56522	1.07982	6.65217	1.0273	4.96	1.54056	6.76	1.3626	2.85714	0.792825	6	1.70294	4.65385	1.29437	6.34615	2.09652	2.46154	1.1266	6.69231	1.1094	4.76923	1.7867
669	鸡鸣犬吠	A place has a large population; hustle and bustle	negative	3.6383	1.45102	5.6383	1.6074	4.18367	1.45306	6.77551	1.41812	3.56522	1.40861	5.52174	1.75472	3.625	1.52693	6.375	1.24455	3.70833	1.51741	5.75	1.48177	4.72	1.17331	7.16	1.49108	4.04545	1.55769	5.31818	1.67293	3.95652	1.4295	7.13043	1.09977	3.28	1.27541	5.92	1.52534	4.38462	1.47179	6.46154	1.60576	3.9	1.91195	5.3	1.94651	3.27273	1.73729
670	鸡犬升天	One person becomes famous and the whole family benefits	negative	3.53191	1.88646	5.98936	1.56903	4.54348	1.79761	6.91304	1.17049	2.64	1.43991	6.12	1.9	4.45455	1.89554	6.86364	0.940894	4.54545	1.84461	5.84091	1.10611	4.625	1.73988	6.95833	1.36666	3.34783	1.96813	5.97826	1.74823	4.56522	2.06323	6.91304	1.31125	3.70833	1.82921	6	1.41421	4.52174	1.53355	6.91304	1.04067	2.30769	1.6525	6.30769	2.09701	4.54545	2.29624
671	鸡犬相闻	Live in a close neighbourhood that could hear the sound of chicken and dog	neutral	5.10476	1.25517	5.06667	1.36767	4.58333	1.35007	6.64583	1.43645	4.88235	1.07046	5.01961	1.00976	4.24	1.16476	6.72	1.42945	5.31481	1.38488	5.11111	1.64451	4.95652	1.46095	6.56522	1.47174	5.11111	1.31273	5.07407	1.4647	4.66667	0.868115	6.41667	1.66594	5.09804	1.20424	5.05882	1.2714	4.5	1.71945	6.875	1.15392	4.92593	1.23805	5.03704	1.28547	4.69231	0.751068
672	鸡鸭鱼肉	Chicken and duck fish	neutral	5.70192	1.10497	5.33654	1.47214	6.125	2.21816	7.75	1.04168	5.34615	0.947331	5.25	1.02661	5.08696	2.10871	7.3913	1.03305	6.05769	1.1447	5.42308	1.81871	7.08	1.89121	8.08	0.953939	5.71698	1.08091	5.33962	1.49285	6.17391	1.96913	7.65217	1.11227	5.68627	1.14	5.33333	1.46515	6.08	2.46509	7.84	0.986577	5.37037	1.11452	5.48148	1.12217	5	1.84391
673	唧唧喳喳	Twitter	negative	3.36957	0.996855	5.73913	1.04211	4.97917	1.76839	7.20833	1.18426	3.69565	0.97397	5.3913	0.891328	5.125	2.07076	6.79167	1.28466	3.04348	0.928256	6.08696	1.08347	4.83333	1.43456	7.625	0.923721	3.5	0.978019	5.58333	0.974308	4.70833	1.70623	7	1.35133	3.22727	1.02036	5.90909	1.1088	5.25	1.82376	7.41667	0.974308	3.83333	0.717741	5.5	0.797724	4.58333	1.83196
674	积年累月	For months and years	neutral	5.15385	0.856378	4.82692	1.31786	4.44681	1.69152	7.38298	1.01195	5.33333	0.711805	4.96078	1.14823	4.04545	2.01133	7.40909	0.959121	4.98113	0.950517	4.69811	1.46215	4.8	1.29099	7.36	1.07548	5.11538	0.758064	4.65385	1.37034	4.41667	1.90917	7.41667	1.1389	5.19231	0.95051	5	1.25245	4.47826	1.47308	7.34783	0.884652	5.28	0.613732	4.88	1.01325	3.83333	2.24958
675	基本药物	Essential medicines	neutral	5	0.213201	3.95556	1.5805	4.71429	1.76777	6.61224	1.82364	5	0	4.5	1.14434	4.2	1.77951	6.6	1.80278	5	0.301511	3.43478	1.77933	5.25	1.62186	6.625	1.88386	5	0	3.33333	1.74165	4.52	1.96044	6.8	1.75594	5	0.294884	4.5	1.21584	4.91667	1.55806	6.41667	1.90917	5	0	3.9	1.52388	4.07692	2.06
676	吉人天相	All is well that ends well	positive	6.6875	1.0946	5.20833	1.84458	4.1875	1.8295	7.25	1.22908	6.54167	1.21509	5.04167	1.85283	3.70833	1.82921	6.95833	1.36666	6.83333	0.963087	5.375	1.86063	4.66667	1.73623	7.54167	1.02062	6.86957	1.17954	5.17391	1.96913	4.5	1.97001	7.40909	1.09801	6.52	1.00499	5.24	1.76257	3.92308	1.69524	7.11538	1.33647	7	1.26491	4.72727	2.28433	3.27273	1.67874
677	吉日良辰	A lucky time and day -- wedding day	positive	6.90385	1.07504	6.13462	1.57688	4.4898	2.02199	7.2449	1.37736	6.86538	1.17204	6.38462	1.6228	3.8	1.75594	7.16	1.59896	6.94231	0.978463	5.88462	1.50364	5.20833	2.06375	7.33333	1.12932	7.01961	1.10436	6.03922	1.49614	4.64	2.30723	7.28	1.67133	6.79245	1.04437	6.22642	1.65995	4.33333	1.711	7.20833	1.02062	6.96	1.17189	6.24	1.73877	4.07692	2.17798
678	吉星高照	Good luck and success in life	positive	7.38298	1.05404	6.65957	1.86823	4.01961	1.9949	7.17647	1.47927	7.34783	0.934622	6.17391	2.22899	3.62963	1.90441	7.07407	1.54237	7.41667	1.17646	7.125	1.32902	4.45833	2.04257	7.29167	1.42887	7.63636	0.847711	6.36364	2.1502	4.24	2.10713	7.16	1.65025	7.16	1.17898	6.92	1.57903	3.80769	1.89777	7.19231	1.32723	7.4	0.843274	5.3	2.35938	3.64286	1.90575
679	极目四望	Gaze far into the distance	neutral	5.33333	1.22474	5.24444	1.04785	6.09804	1.81389	6.68627	1.66722	5.33333	0.57735	5.19048	1.12335	5.57143	1.98939	6.60714	1.16553	5.33333	1.60615	5.29167	0.999094	6.73913	1.35571	6.78261	2.1523	5.47826	1.3774	5.04348	1.10693	6.45833	1.47381	6.95833	1.45898	5.18182	1.05272	5.45455	0.9625	5.77778	2.04438	6.44444	1.82574	5.18182	0.603023	5.09091	1.3751	6	1.4676
680	极目远望	Gaze far into the distance	positive	6.2766	1.22833	5.08511	1.85132	6.04082	1.64518	7.26531	1.20374	6.56	1.38684	5.68	1.74929	5.52	1.75879	7.12	1.30128	5.95455	0.950051	4.40909	1.76363	6.58333	1.34864	7.41667	1.10007	6.34783	1.30065	5.47826	1.92754	6.04	1.56738	7	1.5	6.20833	1.17877	4.70833	1.73153	6.04167	1.75646	7.54167	0.72106	6.53846	1.5064	6.30769	1.54837	5.84615	1.81871
681	即兴之作	Improvisation	positive	6.14583	1.22021	5.625	1.63245	6.0625	1.6296	7.22917	1.09621	6.2	1.38444	5.8	1.55456	5.82609	1.69631	6.91304	1.12464	6.08696	1.04067	5.43478	1.72748	6.28	1.56844	7.52	1.00499	6.4	1.25831	5.6	1.84842	6.29167	1.30148	7.04167	1.36666	5.86957	1.14035	5.65217	1.40158	5.83333	1.90347	7.41667	0.717282	6.38462	1.55662	6.15385	1.46322	6.25	1.48477
682	急急慌慌	Hurried and flurried	negative	3.45652	0.780499	6	1.19257	5.02174	1.81951	7.21739	0.940757	3.47826	0.897956	5.73913	1.17618	5.73913	1.5141	6.82609	0.936734	3.43478	0.662371	6.26087	1.17618	4.30435	1.84477	7.6087	0.782718	3.375	0.710939	6.04167	1.19707	5.45455	1.79224	7.36364	1.0486	3.54545	0.857864	5.95455	1.21409	4.625	1.78916	7.08333	0.829702	3.30769	0.85485	5.84615	0.987096	6.27273	1.42063
683	疾风暴雨	Violent storm	negative	3.90291	1.43154	6.20388	1.12336	2.72917	1.25035	7.4375	0.920366	4.27451	1.37227	6.07843	0.934733	2.5	1.21584	7.375	1.0135	3.53846	1.40673	6.32692	1.27911	2.95833	1.26763	7.5	0.834058	3.9434	1.57401	6.13208	1.22534	2.79167	1.53167	7.54167	1.02062	3.86	1.27791	6.28	1.01096	2.66667	0.916831	7.33333	0.816497	4.26923	1.4299	6	0.848528	2.33333	1.37069
684	疾风骤雨	Howling winds and driving rains	neutral	4.02128	1.53919	6.31915	1.43112	3	1.5	7.28571	1.09924	4.13043	1.74002	6.13043	1.7915	3.12	1.81016	7.12	1.23558	3.91667	1.34864	6.5	0.978019	2.875	1.1156	7.45833	0.931533	3.77273	1.54093	6.27273	1.48586	2.52	1.22882	7.52	1.1225	4.24	1.53514	6.36	1.41067	3.5	1.61515	7.04167	1.0417	3.8	1.98886	6.5	2.12132	2.46154	1.33012
685	嫉贤妒能	Be jealous of the good and envious of the strong	negative	2.70213	1.42821	6.06383	1.50945	4.97959	2.12613	6.87755	1.75158	2.79167	1.53167	5.91667	1.69184	5.16667	2.16025	6.58333	1.76725	2.6087	1.33958	6.21739	1.31275	4.8	2.12132	7.16	1.72434	2.58333	1.28255	5.79167	1.58743	4.68	2.11581	6.8	2.06155	2.82609	1.58551	6.34783	1.40158	5.29167	2.13621	6.95833	1.39811	2.69231	1.49358	5.46154	1.85362	4.76923	2.42053
686	挤挤挨挨	Hustling and jostling	negative	3.44444	0.893297	5.6	1.30384	4.20833	1.80965	7	1.20283	3.40909	1.00755	5.40909	1.22121	5.25	1.77544	6.83333	1.12932	3.47826	0.790257	5.78261	1.38027	3.16667	1.12932	7.16667	1.27404	3.08696	0.99604	5.91304	1.53484	4.17391	1.87452	7.17391	1.30217	3.81818	0.58849	5.27273	0.935125	4.24	1.78606	6.84	1.10604	2.90909	1.04447	5.27273	1.61808	5.08333	2.06522
687	计算机室	Computer room	neutral	5.02439	0.156174	4.21951	1.57341	5.20833	1.30398	7.3125	1.27423	5	0	5	0	4.78261	0.951388	6.78261	1.34693	5.04762	0.218218	3.47619	1.93956	5.6	1.47196	7.8	1	5	0	3.8	1.88065	5.3913	1.49967	7.17391	1.33662	5.04762	0.218218	4.61905	1.11697	5.04	1.09848	7.44	1.22746	5	0	5	0	4.54545	1.12815
688	纪念邮票	Commemorative stamp	neutral	5.58696	0.858321	4.8913	1.43338	5.22449	1.87378	7.16327	1.61177	5.375	0.575779	5.16667	1.23945	4.75	1.25974	7	1.35133	5.81818	1.05272	4.59091	1.59341	5.68	2.24944	7.32	1.8421	5.78261	0.998022	5.26087	1.38883	5.41667	1.74248	7.33333	1.40393	5.3913	0.656376	4.52174	1.41001	5.04	2.00998	7	1.80278	5.38462	0.650444	5.15385	1.51911	4.83333	1.02986
689	纪实小说	Documentary novel	neutral	5.26667	0.653661	4.57778	1.6024	4.92	1.71238	6.84	1.58256	5.36364	0.726731	5.27273	1.07711	4.56	1.75784	6.92	1.03763	5.17391	0.576208	3.91304	1.75585	5.28	1.6207	6.76	2.00582	5.29167	0.690253	4.58333	1.63964	5.07692	1.67148	6.73077	1.5889	5.2381	0.624881	4.57143	1.59911	4.75	1.77544	6.95833	1.60106	5.33333	0.651339	5.16667	1.2673	4.78571	1.76193
690	技压群雄	Outstanding	positive	7.00971	1.10698	6.78641	1.40483	5.44	2.2782	7.12	1.30368	6.84314	1.20619	6.54902	1.67707	4.84615	2.27495	7.07692	1.3542	7.17308	0.98461	7.01923	1.03829	6.08333	2.1451	7.16667	1.27404	7.05769	1.27439	6.78846	1.36247	5.72	2.44131	7.2	1.41421	6.96078	0.915659	6.78431	1.46032	5.16	2.11503	7.04	1.20692	6.76923	1.45073	6.61538	1.52517	5.61538	2.50128
691	济困扶危	Help the one in need	positive	6.78261	1.09368	5.8913	1.74137	6.41667	1.67374	7.125	1.37802	6.76	1.09087	6.04	1.45717	5.84	1.88591	6.88	1.53623	6.80952	1.12335	5.71429	2.05287	7.04348	1.14726	7.3913	1.15755	6.91304	1.34547	6	1.78377	6.12	1.94336	7.28	1.27541	6.65217	0.775107	5.78261	1.73091	6.73913	1.28691	6.95652	1.49174	6.92308	1.25576	5.92308	1.49786	5.69231	2.32324
692	加油打气	Cheers	positive	6.29	1.2415	6.05	1.44512	6.09615	1.91239	7.57692	0.956836	5.73469	0.974156	5.42857	1.41421	5.5	1.85592	7.25	0.887151	6.82353	1.24428	6.64706	1.21365	6.79167	1.76879	7.95833	0.907896	6.28	1.24605	5.92	1.52315	6.30769	1.82799	7.57692	1.06482	6.3	1.24949	6.18	1.36561	5.88462	2.00653	7.57692	0.856648	5.5	0.780189	5.125	1.2959	5.85714	1.95555
693	家贼难防	A thief in the family is difficult to detect.	negative	2.90099	1.00504	6.50495	1.27768	3.73469	1.78857	7.04082	1.3988	3.15686	1.12022	6.21569	1.26986	4.28	1.92614	6.8	1.75594	2.64	0.802038	6.8	1.2289	3.16667	1.46456	7.29167	0.858673	2.79592	1.09886	6.69388	1.12183	3.47826	1.53355	7.08696	1.31125	3	0.907485	6.32692	1.39637	3.96154	1.98959	7	1.49666	3.04167	1.23285	6.45833	1.17877	4.08333	1.88092
694	夹七夹八	Incoherent	negative	3.55556	1.05649	5.31111	1.36219	4.82353	1.07156	5.76471	1.95538	3.6087	1.03305	5	1.2792	4.74074	1.02254	6.03704	1.48016	3.5	1.10195	5.63636	1.39882	4.91667	1.1389	5.45833	2.37705	3.38095	1.16087	5.80952	1.24976	4.80769	0.895287	5.69231	1.84974	3.70833	0.954585	4.875	1.32902	4.84	1.24766	5.84	2.09523	3.4	1.17379	5.5	1.17851	4.78571	0.892582
695	假传圣旨	Deliver a false order	negative	2.58696	1.30939	6.65217	1.68941	3.95833	1.90138	6.64583	1.7923	2.45455	1.405	6.36364	2.12794	3.92	1.99833	6.6	1.65831	2.70833	1.23285	6.91667	1.1389	4	1.83402	6.69565	1.9641	2.5	1.44463	6.75	1.91675	3.91667	1.95419	7.20833	1.35066	2.68182	1.17053	6.54545	1.43849	4	1.88818	6.08333	2.01983	2.16667	1.4668	6.66667	2.46183	3.84615	1.99358
696	假冒伪劣	Counterfeit and shoddy	negative	2.31111	1.20269	6.44444	2.04	4.08696	1.91863	7.30435	1.11295	2.31818	1.2868	6.13636	2.27398	4.34783	2.32787	6.91304	1.04067	2.30435	1.14554	6.73913	1.7893	3.82609	1.40299	7.69565	1.06322	2.38095	1.32198	6.52381	2.04007	4.22727	2.20242	7.59091	1.14056	2.25	1.11316	6.375	2.08123	3.95833	1.65448	7.04167	1.0417	2.1	1.28668	6	2.21108	4.27273	2.86674
697	价值连城	Valuable	positive	7.0625	1.37464	6.54167	2.02073	4.17021	2.04641	7.06383	1.68632	6.91667	1.63964	6.20833	2.28376	3.66667	2.18028	6.58333	1.99819	7.20833	1.06237	6.875	1.70198	4.69565	1.79481	7.56522	1.12112	7.24	1.39284	6.76	2.02649	4.25	2.15184	6.875	2.09165	6.86957	1.35862	6.30435	2.03235	4.08696	1.97514	7.26087	1.13688	7.30769	1.60128	6.69231	2.3939	4.30769	2.49615
698	价值千金	The value of a thousand gold	positive	6.6087	1.30773	6.43478	1.86967	4.46	1.69284	6.92	1.08496	6.625	1.20911	5.95833	2.19642	4.04	1.79072	6.88	1.0924	6.59091	1.43623	6.95455	1.29016	4.88	1.50886	6.96	1.09848	6.66667	1.16718	6.625	1.88386	4.16	1.46287	6.88	1.23558	6.54545	1.47122	6.22727	1.87545	4.76	1.87705	6.96	0.934523	6.71429	1.20439	6.5	2.31218	3.69231	1.4367
699	嫁鸡随鸡	Advice to be contented with the man a woman has married	negative	3.6383	1.22342	5.08511	1.4866	4.3617	1.78673	7.02128	1.3908	3.66667	1.20386	5	1.41421	4.6087	1.4058	6.65217	1.19121	3.6087	1.2699	5.17391	1.58551	4.125	2.09165	7.375	1.49819	3.33333	1.40393	5.125	1.48361	4.73913	1.88818	7.43478	1.23679	3.95652	0.928256	5.04348	1.52191	4	1.64184	6.625	1.43898	3.61538	1.50214	5.07692	1.38212	5.27273	1.61808
700	尖声尖气	Sharp tone	negative	3.625	1.34678	5.97917	1.45119	5.51064	1.64015	7.10638	1.18384	3.83333	1.40393	5.70833	1.23285	5.91667	1.44212	7.125	0.946963	3.41667	1.28255	6.25	1.62186	5.08696	1.75585	7.08696	1.41142	3.29167	0.999094	6.29167	1.30148	5.52174	1.80579	7.26087	1.28691	3.95833	1.57367	5.66667	1.55106	5.5	1.50362	6.95833	1.08264	3.33333	1.07309	6	1.12815	5.83333	1.6967
701	尖声细气	High-pitched voice	neutral	4.02885	1.08347	5.24038	1.28089	5.28571	1.67083	6.93878	1.67591	4.36	0.984782	5.08	0.899887	5.32	1.65126	6.68	1.54704	3.72222	1.08882	5.38889	1.54696	5.25	1.72576	7.20833	1.7932	4.07692	1.21826	5.25	1.20253	5.5	1.71945	7.08333	1.90917	3.98077	0.939136	5.23077	1.36648	5.08	1.63095	6.8	1.44338	4.68	0.945163	5.2	0.57735	5.46154	1.94145
702	艰苦朴素	Be plain in one's style of living	positive	6.2243	1.35499	5.28972	1.71018	5.75472	2.26941	7.83019	0.871247	6.50909	1.27472	5.41818	1.92152	5.78571	2.49974	7.85714	0.931518	5.92308	1.38403	5.15385	1.46039	5.72	2.03142	7.8	0.816497	6.10714	1.42291	5.17857	1.68531	5.77778	2.3094	7.88889	0.847319	6.35294	1.27787	5.41176	1.74558	5.73077	2.27258	7.76923	0.908083	6.34483	1.2614	5.44828	1.82417	5.86667	2.4456
703	艰苦卓绝	Extremely hard and bitter	neutral	5.94444	1.65896	6.125	1.43812	5.23333	2.06659	7.35556	0.951771	6.37838	1.47771	6.16216	1.53522	5.08889	2.04297	7.13333	0.967659	5.48571	1.7257	6.08571	1.33778	5.37778	2.10291	7.57778	0.891599	5.94203	1.78955	6.31884	1.24254	5.15556	2.20491	7.33333	1.08711	5.94667	1.54126	5.94667	1.5845	5.31111	1.94027	7.37778	0.805912	6.18421	1.69028	6.34211	1.45707	4.95238	2.20173
704	兼听则明	Listen to different opinions and you will understand	positive	6.60417	1.00508	4.8125	1.73397	5.85714	1.90394	6.73469	1.94482	6.70833	0.999094	4.29167	1.62799	5.70833	1.98865	7.04167	1.48848	6.5	1.02151	5.33333	1.711	6	1.84842	6.44	2.29274	6.68	1.06927	4.4	1.82574	5.68	1.90875	6.6	1.77951	6.52174	0.947224	5.26087	1.54383	6.04167	1.92194	6.875	2.13282	6.84615	0.898717	4.07692	1.89128	5.61538	1.93815
705	煎炒烹炸	Fry and cook	neutral	5.8	0.94388	5.37778	1.55635	5.94	2.05446	7.62	1.00793	5.47619	0.872872	5.14286	1.27615	5.44	2.14243	7.52	0.962635	6.08333	0.928611	5.58333	1.76725	6.44	1.87261	7.72	1.06145	5.95455	0.998917	5.09091	1.74326	6.28	1.92614	7.84	1.02794	5.65217	0.884652	5.65217	1.33514	5.6	2.16025	7.4	0.957427	5.9	1.1005	5.1	1.72884	6.15385	1.99358
706	减亏增盈	Reduce losses and gain earnings	positive	6.31915	1.43112	6.02128	1.63507	5.26531	1.93408	6.97959	1.18127	6.91667	1.24819	6.25	1.62186	5.44	2.04287	6.96	0.840635	5.69565	1.36298	5.78261	1.65025	5.08333	1.83958	7	1.47442	6.30435	1.52061	5.82609	1.74908	5.41667	1.88626	6.83333	1.46456	6.33333	1.37261	6.20833	1.53167	5.12	2.00666	7.12	0.832666	6.90909	1.22103	5.81818	1.4013	6	1.80907
707	减税让利	Reduce tax on enterprises and let them to retain more profits	positive	6.29787	1.17797	6.04255	1.55979	3.8125	1.92029	6.83333	1.19098	6.41667	1.01795	5.95833	1.73153	3.04167	1.70623	6.5	1.41421	6.17391	1.33662	6.13043	1.39167	4.58333	1.83958	7.16667	0.816497	6.36364	0.902138	5.90909	1.57084	3.81818	1.94291	6.86364	1.4895	6.24	1.39284	6.16	1.57268	3.80769	1.93947	6.80769	0.895287	6.36364	0.6742	5.36364	1.68954	2.90909	1.7581
708	减租减息	Reduction of rent and interest rate	positive	6.57447	1.19318	6.02128	1.70025	4.33333	2.23448	6.83333	1.41922	6.625	1.31256	6.16667	1.73623	3.875	2.13282	6.75	1.56733	6.52174	1.08165	5.86957	1.68696	4.79167	2.28376	6.91667	1.28255	6.6	1.29099	6.12	2.00666	4.36	2.11896	6.6	1.55456	6.54545	1.10096	5.90909	1.306	4.30435	2.40142	7.08696	1.23998	6.76923	1.5359	6.46154	1.98391	3.53846	1.8081
709	简化汉字	Simplified chinese characters	neutral	5.27551	0.654573	4.91837	1.32908	5.2549	2.26135	7.47059	1.28613	5.33333	0.753244	5.29167	0.92157	4.30769	2.07402	7.30769	1.01071	5.22	0.545482	4.56	1.55393	6.24	2.04695	7.64	1.52425	5.20408	0.539274	4.85714	1	5.04	2.28181	7.76	1.05198	5.34694	0.751416	4.97959	1.60065	5.46154	2.26682	7.19231	1.44275	5.28	0.613732	5.08	0.759386	4.07692	1.89128
710	简简单单	Simple	neutral	5.30952	0.64347	4.59524	1.63885	5.93478	1.56918	7.65217	0.947919	5.15789	0.374634	4.84211	0.50146	5.36364	1.59001	7.18182	0.906924	5.43478	0.787752	4.3913	2.16877	6.45833	1.38247	8.08333	0.775532	5.21739	0.421741	4.65217	1.79921	5.91304	1.67639	7.52174	1.16266	5.42105	0.837708	4.52632	1.46699	5.95652	1.49174	7.78261	0.671262	5.18182	0.40452	4.72727	0.64667	5.36364	1.80404
711	见财起意	Think of stealing on seeing sb.'s money	negative	2.71028	1.14932	6.31776	1.35004	5.42593	1.85921	7.2037	1.15546	2.37736	1.21254	6.49057	1.53951	5.41379	1.84231	6.86207	1.27403	3.03704	0.989815	6.14815	1.12279	5.44	1.91659	7.6	0.866025	2.50909	1.12006	6.56364	1.2876	5.37037	1.75736	7.11111	1.42325	2.92308	1.15209	6.05769	1.37789	5.48148	1.98785	7.2963	0.823446	2.07143	1.05158	6.89286	1.49912	5.2	1.78085
712	见风转舵	Temporization	negative	3.15094	1.21728	6.00943	1.28356	5.42553	1.83853	7.12766	0.991639	3.07407	1.30097	5.90741	1.36352	5.5	1.7693	6.875	1.1156	3.23077	1.13094	6.11538	1.19892	5.34783	1.94489	7.3913	0.782718	3.11111	1.14376	6	1.33176	5.45833	1.93321	7.20833	0.931533	3.19231	1.29915	6.01923	1.24444	5.3913	1.77711	7.04348	1.06508	3.14286	1.35303	5.82143	1.38921	5.84615	1.81871
713	见机而行	Take the opportunity to act	neutral	5.87755	1.16606	5.40816	1.54	6.31915	1.57572	7.31915	1.00231	6.04	1.20692	5.12	1.78699	6.30435	1.32921	7.04348	0.975997	5.70833	1.12208	5.70833	1.19707	6.33333	1.8098	7.58333	0.974308	5.84615	1.28662	5.46154	1.5292	6.47826	1.56291	7.17391	1.15413	5.91304	1.04067	5.34783	1.58426	6.16667	1.60615	7.45833	0.832971	5.71429	1.26665	5.14286	1.95555	6.45455	1.75292
714	见机而作	Take advantage of an opportunity that comes one's way	neutral	5.0396	1.08555	5.33663	0.982621	6.26531	1.31934	6.7551	1.70209	5.18367	0.882078	5.18367	0.781917	6.07692	1.41204	6.84615	1.4613	4.90385	1.2408	5.48077	1.12877	6.47826	1.20112	6.65217	1.96813	4.97959	1.01015	5.30612	0.683255	6.375	1.34528	6.875	1.67624	5.09615	1.1591	5.36538	1.20504	6.16	1.31276	6.64	1.75309	5.16667	0.637022	5.125	0.536697	6.15385	1.46322
715	见景生情	Be moved by what one sees	positive	6.04167	1.18426	5.91667	1.49941	4.97872	2.01612	7.34043	0.938931	6.20833	1.06237	6.25	1.25974	5.08696	1.88084	6.91304	0.792754	5.875	1.2959	5.58333	1.66594	4.875	2.17321	7.75	0.896854	5.80769	1.13205	6.15385	1.15559	4.56522	2.01869	7.3913	1.03305	6.31818	1.21052	5.63636	1.81385	5.375	1.97402	7.29167	0.858673	6.35714	0.928783	6.64286	0.841897	4.81818	2.13627
716	健健康康	Healthy	positive	7.18224	1.13975	5.21963	2.13702	6.10417	1.82465	7.72917	1.08647	7.2	1.28236	5.65455	2.27073	5.45833	1.7932	7.41667	1.21285	7.16346	0.978801	4.75962	1.9007	6.75	1.64845	8.04167	0.858673	7.19444	1.15095	5.36111	2.16406	6.45455	1.84461	8	0.9759	7.16981	1.13909	5.07547	2.11995	5.80769	1.78928	7.5	1.14018	7.25	1.32288	5.82143	2.40453	5.81818	2.18258
717	江山如画	Picturesque landscape	positive	7.36957	1.19923	5.76087	2.37753	4.07843	2.10564	7.64706	0.976187	7.54545	1.22386	6.22727	2.52477	3.55556	2.0064	7.51852	0.935224	7.20833	1.17877	5.33333	2.20013	4.66667	2.099	7.79167	1.02062	7.45833	1.28466	5.45833	2.57039	4.375	2.14299	7.83333	0.916831	7.27273	1.12045	6.09091	2.15824	3.81481	2.07618	7.48148	1.01414	7.66667	1.37069	5.33333	2.96444	4.38462	2.2188
718	江山易改	Leopard can not change	neutral	4.5619	1.23976	5.53333	1.11861	4.02128	1.75064	7.25532	1.09282	4.90385	1.2408	5.59615	0.822708	3.96	1.79072	6.88	1.01325	4.22642	1.15428	5.4717	1.35311	4.09091	1.74326	7.68182	1.04135	4.4717	1.40882	5.54717	1.01083	3.625	1.73988	7.16667	1.30773	4.65385	1.04571	5.51923	1.22859	4.43478	1.70096	7.34783	0.831685	5	1.30089	5.59259	0.843949	3.76923	2.0064
719	将功补过	Take the merit for mistakes	positive	6.19792	1.08539	5.72917	1.41029	6.12245	1.82155	7.36735	1.05463	6.08	1.25565	5.92	1.44106	6	1.84842	7.12	1.05357	6.32609	0.873976	5.52174	1.3774	6.25	1.82376	7.625	1.0135	5.97917	1.20216	5.66667	1.46456	6.2	1.93649	7.52	1.1225	6.41667	0.928611	5.79167	1.38247	6.04167	1.73153	7.20833	0.977093	5.84615	1.3445	6.15385	1.28103	6	2.08167
720	将功赎罪	Take the merit for mistakes	positive	6.2766	1.2459	6.06383	1.38947	5.51923	1.89416	7.28846	1.1261	6.45833	1.21509	6.04167	1.5458	5	1.90142	7.03704	0.979854	6.08696	1.27611	6.08696	1.23998	6.08	1.75404	7.56	1.22746	6.29167	1.08264	6	1.31876	5.69231	1.8925	7.03846	1.28002	6.26087	1.42118	6.13043	1.48643	5.34615	1.91713	7.53846	0.904689	6.30769	1.03155	6.15385	1.46322	5	2
721	将功折罪	Make up for one's error	neutral	5.76471	1.07332	5.56863	1.19826	5.13725	1.9801	7.23529	1.20976	5.65306	1.07143	5.57143	1.25831	5.07692	1.95802	7.26923	0.874423	5.86792	1.07485	5.56604	1.15208	5.2	2.04124	7.2	1.5	5.84615	1.05505	5.59615	1.28734	4.92308	1.99846	7.19231	1.02056	5.68	1.09619	5.54	1.11043	5.36	1.97653	7.28	1.4	5.8	1.1547	5.76	1.42244	4.64286	2.16997
722	讲经说法	Expound the texts of buddhism	neutral	5.20755	0.922904	4.65094	1.28761	4.65217	1.62231	6.45652	1.60148	5.51852	0.946508	4.98148	1.03688	4.65217	1.74795	6.56522	1.12112	4.88462	0.783503	4.30769	1.43539	4.65217	1.5258	6.34783	1.99109	5.2037	1.0707	4.66667	1.3598	4.80952	1.50396	6.90476	1.30018	5.21154	0.749811	4.63462	1.2212	4.52	1.73494	6.08	1.75404	5.67857	1.09048	4.92857	1.21499	4.54545	1.86353
723	奖罚分明	Keep strictly the rules for reward and punishment	positive	6.46809	1.3163	5.87234	1.64999	5.44681	2.39391	7.46809	1.08048	6.30435	1.4596	6.08696	1.72977	5.21739	2.44868	7.26087	0.915393	6.625	1.1726	5.66667	1.57885	5.66667	2.37133	7.66667	1.20386	6.47826	1.3774	5.91304	1.70329	5.17391	2.75767	7.69565	1.10514	6.45833	1.28466	5.83333	1.63299	5.70833	2.01039	7.25	1.03209	6.09091	1.51357	6.45455	1.50756	4.90909	2.84445
724	奖优罚劣	Reward the good and fine the bad	positive	6.40816	1.22336	5.7551	1.66497	5.61224	2.12932	7.36735	1.0742	6.6	1.22474	6.16	1.40475	5.45833	2.2063	7.29167	0.750604	6.20833	1.21509	5.33333	1.83366	5.76	2.08726	7.44	1.32539	6.4	1.1547	6	1.77951	5.26087	2.2201	7.26087	1.28691	6.41667	1.31601	5.5	1.53226	5.92308	2.0381	7.46154	0.859338	6.69231	1.31559	6.84615	1.21423	5.36364	2.50091
725	降龙伏虎	Overcome powerful adversaries	positive	6.23404	1.3386	6.42553	1.5845	4.67308	2.28139	6.69231	1.62744	6.21739	1.50625	6.04348	1.79591	3.92593	2.01773	6.55556	1.67179	6.25	1.18872	6.79167	1.28466	5.48	2.31157	6.84	1.59896	6.27273	1.45346	6.36364	1.64882	5.23077	2.32048	6.61538	1.79057	6.2	1.25831	6.48	1.55778	4.11538	2.14153	6.76923	1.47804	6	1.49071	5.8	1.75119	3.85714	2.0327
726	交叉科学	Interdisciplinary science	neutral	5	0.369274	4.35556	1.43266	4.72	1.71476	6.12	2.00652	5	0.426401	4.82609	0.834058	4.12	1.48099	5.56	2.2561	5	0.308607	3.86364	1.75378	5.32	1.74929	6.68	1.57374	4.95652	0.474654	4.34783	1.58426	5	1.63299	5.88	2.26053	5.04545	0.213201	4.36364	1.29267	4.44	1.78139	6.36	1.72916	4.91667	0.514929	4.83333	1.11464	4.30769	1.31559
727	娇声娇气	Speak in a seductive tone	negative	3.82979	1.49374	5.29787	1.80476	5.53191	1.71757	7.12766	1.36122	3.95652	1.26053	5.30435	1.57926	5.66667	1.46456	6.83333	0.963087	3.70833	1.70623	5.29167	2.0319	5.3913	1.97114	7.43478	1.64665	3.40909	1.46902	5.59091	1.79043	5.63636	1.83991	7.40909	1.2596	4.2	1.44338	5.04	1.81384	5.44	1.63503	6.88	1.42361	3.6	1.3499	5.1	1.79196	5.75	1.65831
728	骄兵必败	The self-conceited troops are destined to fail	neutral	4.34091	1.42964	5.79545	1.42371	4.76471	1.79542	7.17647	1.47927	4.25	1.77334	5.55	1.5035	4.81481	1.98139	6.77778	1.52753	4.41667	1.10007	6	1.35133	4.70833	1.60106	7.625	1.31256	4.20833	1.50302	5.70833	1.45898	4.92	1.93477	7.04	1.7195	4.5	1.35724	5.9	1.41049	4.61538	1.67516	7.30769	1.22537	4	1.95402	5.58333	1.62135	4.64286	2.23975
729	骄奢淫逸	Pride luxury	negative	2.47917	1.41406	7.08333	1.49941	4.69231	1.86336	6.34615	2.19522	2.20833	1.35066	7.29167	1.57367	4.92593	1.92005	5.74074	2.42729	2.75	1.45213	6.875	1.42379	4.44	1.80462	7	1.73205	2.58333	1.55806	7.08333	1.71735	4.30769	1.61912	6.19231	2.33271	2.375	1.27901	7.08333	1.28255	5.07692	2.0381	6.5	2.08327	2.5	1.62369	7.16667	1.6967	4.07143	1.77436
730	骄阳似火	The scorching sun is like a fire.	neutral	4.34783	1.87637	6	1.4453	3	1.6413	7.72	1.1073	4.45455	2.04071	6.04545	1.3965	2.88	1.71561	7.68	1.14455	4.25	1.75078	5.95833	1.51741	3.12	1.58955	7.76	1.09087	4.04167	1.96666	5.70833	1.42887	3.08	1.86905	7.8	1.11803	4.68182	1.75625	6.31818	1.42716	2.92	1.41185	7.64	1.11355	3.91667	2.06522	5.83333	1.40346	2.61538	1.75777
731	脚不沾地	Do not touch the ground	neutral	4.70213	1.44335	5.14894	1.69371	5.82	1.95553	6.8	1.57791	4.84	1.65025	5.52	1.5843	5.56	2.14243	7.12	1.16619	4.54545	1.18431	4.72727	1.7507	6.08	1.75404	6.48	1.8735	4.52174	1.56291	4.95652	1.82105	5.91667	1.74248	6.875	1.39292	4.875	1.32902	5.33333	1.57885	5.73077	2.1644	6.73077	1.75631	4.69231	1.70219	5.23077	1.73944	5.75	2.00567
732	叫叫嚷嚷	Yell	negative	3.13043	1.20386	6.13043	1.18526	5.32653	1.80725	7.32653	1.10657	3.54545	1.26217	5.68182	1.17053	5.79167	1.66757	7.125	1.191	2.75	1.03209	6.54167	1.06237	4.88	1.85562	7.52	1.00499	3.04167	1.39811	6.04167	1.16018	5.33333	1.83366	7.375	0.76967	3.22727	0.972567	6.22727	1.23179	5.32	1.81934	7.28	1.36991	3.5	1.5667	5.5	1.08711	5.58333	1.72986
733	教学环节	Teaching steps	neutral	5.2381	1.00752	5.02381	1.17884	4.04167	1.78598	7.41667	1.02798	5.25	0.55012	5.2	0.523148	4.04167	1.57367	7	0.932505	5.22727	1.30683	4.86364	1.55212	4.04167	2.01039	7.83333	0.963087	5.31818	1.32328	5.27273	0.767297	4.52174	2.01967	7.43478	0.992063	5.15	0.48936	4.75	1.48235	3.6	1.44338	7.4	1.08012	5.45455	0.687552	5.36364	0.6742	3.90909	1.70027
734	教学相长	Teaching benefits teachers as well as students	neutral	5.84783	1.1149	5	1.53478	5.4898	1.73352	6.22449	1.71106	5.95455	1.17422	5.59091	1.09801	5.16667	1.9708	6.20833	1.66757	5.75	1.07339	4.45833	1.69344	5.8	1.44338	6.24	1.78606	5.91667	1.21285	5.125	1.62354	5.86957	1.6598	6.43478	1.59049	5.77273	1.02036	4.86364	1.45718	5.15385	1.75937	6.03846	1.82166	6	1.41421	5.83333	1.02986	5.63636	2.11058
735	教子有方	Bring up one's kids properly	positive	6.84783	1.03209	5.6087	1.96048	6.04255	1.95557	7.55319	0.904302	6.95455	1.17422	6.27273	1.88179	6.17391	2.12458	7.47826	0.790257	6.75	0.896854	5	1.86501	5.91667	1.81579	7.625	1.0135	7	1.28537	5.875	2.15311	6	1.97714	7.43478	0.992063	6.68182	0.646335	5.31818	1.72892	6.08333	1.97631	7.66667	0.816497	7.16667	1.40346	6.75	2.00567	6.09091	2.38556
736	接力赛跑	Relay race	neutral	5.74468	1.13191	5.89362	1.57748	5.375	1.97457	7.58333	1.02798	5.86957	1.09977	5.78261	1.50625	5	1.95789	7.36	0.994987	5.625	1.1726	6	1.66812	5.78261	1.95301	7.82609	1.02922	5.86364	1.12527	5.95455	1.96341	5.125	2.09165	7.70833	0.954585	5.64	1.15036	5.84	1.17898	5.625	1.86063	7.45833	1.10253	5.8	1.0328	5.7	1.82878	4.46154	2.02548
737	接受美学	Reception aesthetics	neutral	5.68889	0.949216	5.15556	1.74454	5.18367	1.6792	5.93878	1.89746	5.91304	1.12464	5.56522	1.59049	5.08333	1.76725	6.45833	1.06237	5.45455	0.670982	4.72727	1.83048	5.28	1.6207	5.44	2.36432	5.78261	1.0853	5.34783	1.87347	5.25	1.56733	5.58333	1.66594	5.59091	0.796366	4.95455	1.61768	5.12	1.81016	6.28	2.07204	6.15385	1.28103	5.76923	2.0064	5.25	1.76455
738	节哀顺变	Restrain one's grief and accord with inevitable changes	negative	3.39216	1.38705	5.88235	1.24514	4.3	2.09226	7.18	1.10083	4.02041	1.42141	5.61224	0.953422	4.73077	2.01112	7.03846	0.773603	2.81132	1.07519	6.13208	1.42826	3.83333	2.11961	7.33333	1.37261	3.25	1.43998	5.92308	1.31128	4.28	2.18937	7.12	1.33292	3.54	1.32803	5.84	1.18425	4.32	2.03552	7.24	0.830662	3.84	1.49108	5.64	1.03602	4.61538	2.14237
739	节节败退	Retreats	negative	2.955	1.15491	6.33	1.3413	3.37778	1.52686	6.64444	1.38425	2.86538	1.31401	6.28846	1.51252	3.6087	1.77711	6.21739	1.31275	3.05208	0.957832	6.375	1.14157	3.13636	1.20694	7.09091	1.34196	2.85294	1.26607	6.37255	1.35589	3.5	1.81779	6.45833	1.71893	3.06122	1.02892	6.28571	1.33853	3.2381	1.13599	6.85714	0.853564	2.62963	1.27545	6.44444	1.47631	3.83333	2.24958
740	结发夫妻	Husband and wife by the first marriage	positive	6.76087	1.41711	5.19565	2.26686	5.34694	2.06711	7.65306	0.902566	6.77273	1.60154	5.63636	2.34105	4.96	2.35372	7.68	1.02956	6.75	1.25974	4.79167	2.16653	5.75	1.67462	7.625	0.76967	6.70833	1.5458	4.83333	2.37133	5.68	1.97315	7.8	1	6.81818	1.29601	5.59091	2.13048	5	2.14679	7.5	0.780189	6.75	1.76455	5.08333	2.57464	5.38462	2.46774
741	结义弟兄	Brethren	positive	6.31915	1.10545	6.31915	1.36901	5.71429	1.59426	7.20408	1.20726	6.13043	1.28997	6.08696	1.23998	5.36	1.62993	7.04	0.888819	6.5	0.884652	6.54167	1.47381	6.08333	1.50121	7.375	1.46888	6.56522	1.07982	6.17391	1.49703	6	1.73205	7.24	1.33167	6.08333	1.10007	6.45833	1.25036	5.41667	1.41165	7.16667	1.09014	6.54545	1.12815	6.45455	1.29334	5.76923	1.64083
742	解剖麻雀	Dissect a “sparrow” -- to analyse a typical case	negative	3.73913	1.80659	5.78261	1.7245	5.5102	2.2091	6.30612	1.9494	4.68182	1.88696	5.68182	1.2868	5.25	1.91675	6.70833	1.36666	2.875	1.22696	5.875	2.07076	5.76	2.47117	5.92	2.34379	3.5	1.7693	6.33333	1.49395	5.54167	2.62064	6.75	2.00543	4	1.85164	5.18182	1.78982	5.48	1.78232	5.88	1.83303	4.16667	1.94625	5.83333	1.4668	5	2.3355
743	借酒浇愁	Drown one's sorrows in wine	negative	3.34615	1.05912	5.875	1.16325	5.26531	2.20582	7.28571	1.22474	3.26923	1.05003	5.94231	1.24323	5.04167	2.21613	7.04167	0.999094	3.42308	1.07277	5.80769	1.08535	5.48	2.21961	7.52	1.38804	3.16667	1.16149	5.94444	1.0536	5.08333	2.16527	7.33333	1.16718	3.54	0.908239	5.8	1.27775	5.44	2.2745	7.24	1.3	2.96429	1.17006	6.25	1.2057	4.58333	2.31432
744	借水行舟	Sail a boat by water	neutral	5.53061	1.04287	4.89796	1.34234	5.29167	1.98889	6.72917	1.44015	5.72	0.936305	5.44	0.960902	4.95652	2.24577	6.73913	0.963771	5.33333	1.12932	4.33333	1.46456	5.6	1.70783	6.72	1.79165	5.68	0.945163	4.76	1.42244	5.3913	2.29107	6.86957	1.14035	5.375	1.13492	5.04167	1.26763	5.2	1.70783	6.6	1.68325	5.61538	1.1209	5.61538	0.960769	4.90909	2.66288
745	今古奇观	An unheard-of fantastic story	positive	6.57143	1.0177	6.29524	1.49309	4.18367	1.92217	6.93878	1.50566	6.57692	1.07277	6.38462	1.51015	3.66667	1.83366	6.95833	0.999094	6.56604	0.970912	6.20755	1.48529	4.68	1.90875	6.92	1.89121	6.52941	0.902285	6.39216	1.31268	4.125	1.985	6.95833	1.65448	6.61111	1.12295	6.2037	1.65267	4.24	1.89912	6.92	1.38203	6.52	1.00499	6.44	1.52971	3.33333	1.82574
746	金鼓齐鸣	Gongs and drums sounded	positive	6.68085	1.18149	6.40426	1.66367	5.0625	1.71856	6.25	1.5912	6.86957	1.21746	6.30435	1.94082	4.79167	1.81729	6.04167	1.36666	6.5	1.14208	6.5	1.38313	5.33333	1.60615	6.45833	1.7932	6.63636	1.329	6.40909	1.84285	5	1.95402	6.3913	1.64425	6.72	1.06145	6.4	1.52753	5.12	1.50886	6.12	1.56312	7.1	1.28668	6.5	2.12132	4.72727	2.10195
747	金口玉言	Valuable advice	positive	6.5	1.07188	5.54167	1.64974	4.84314	2.07241	7.2549	1.12859	6.54167	1.17877	5.625	1.78916	4.14815	1.99429	7.11111	1.05003	6.45833	0.977093	5.45833	1.53167	5.625	1.9068	7.41667	1.21285	6.47826	1.27456	5.65217	1.43364	4.46154	1.81617	7	1.29615	6.52	0.87178	5.44	1.85023	5.24	2.27816	7.52	0.87178	6.45455	1.36848	5.18182	1.88776	4	1.88108
748	金玉良言	Invaluable advice	positive	6.81905	1.02639	6.18095	1.43969	5	1.89737	7.2549	0.913086	6.81132	1.11038	6.22642	1.58892	4.65385	1.93788	7.26923	0.827415	6.82692	0.943942	6.13462	1.28382	5.36	1.823	7.24	1.0116	7.03846	1.08396	6.15385	1.55153	5.04	1.98914	7.28	0.890693	6.60377	0.926939	6.20755	1.3353	4.96154	1.84349	7.23077	0.951113	7	1.22474	6.36	1.70489	4.84615	2.30384
749	金玉满堂	Gold and jade fill the hall -- abundant wealth or many children in the family	positive	7.06122	1.24847	5.7551	2.01588	4.73077	1.89028	6.63462	1.66897	6.92308	1.44009	5.88462	2.35503	4.11111	1.90815	6.92593	1.35663	7.21739	0.998022	5.6087	1.588	5.4	1.65831	6.32	1.93046	7.08	1.55242	5.76	2.04695	5.15385	1.51505	6.42308	1.92194	7.04167	0.858673	5.75	2.02699	4.30769	2.14978	6.84615	1.37673	6.78571	1.80506	6.21429	2.48623	4.85714	1.40642
750	仅供参考	For reference only	neutral	4.725	0.678894	5.025	0.65974	4.61702	1.37609	7.2766	1.15537	5	0	4.89474	0.567131	4.86364	0.83355	6.63636	1.1358	4.47619	0.872872	5.14286	0.727029	4.4	1.70783	7.84	0.85049	4.73684	0.561951	5.10526	0.809303	4.72727	1.12045	7.13636	1.39029	4.71429	0.783764	4.95238	0.497613	4.52	1.5843	7.4	0.912871	5	0	4.88889	0.781736	4.7	0.483046
751	紧赶慢赶	Rush to catch up	neutral	4.67327	1.02087	5.58416	0.886198	5.35417	2.0472	7.45833	1.051	5.07843	1.03621	5.27451	0.801958	6.08333	1.99819	7.41667	0.928611	4.26	0.828325	5.9	0.863075	4.625	1.86063	7.5	1.17954	4.38	0.90102	5.82	0.962353	5.17391	2.14587	7.56522	0.895752	4.96078	1.05756	5.35294	0.7436	5.52	1.98158	7.36	1.18603	4.79167	0.72106	5.29167	0.858673	5.81818	2.0405
752	紧急状态	State of emergency	negative	4	1.31426	6.62222	1.35326	3.10417	1.6789	7.10417	1.2922	4.38095	1.32198	6.28571	1.23056	3.26087	1.62976	7	0.797724	3.66667	1.23945	6.91667	1.41165	2.96	1.74356	7.2	1.63299	3.7	1.41793	6.95	1.60509	3.65217	1.96813	7.26087	1.09617	4.24	1.2	6.36	1.07548	2.6	1.19024	6.96	1.45717	4.125	1.24642	6.5	1.30931	3.63636	1.91169
753	紧锣密鼓	Wildly beating gongs and drums	neutral	4.6875	1.55955	6	1.51587	5.03922	1.82166	7.35294	1.01634	4.91667	1.5299	5.79167	1.50302	4.81481	1.71053	7.18519	0.921414	4.45833	1.58743	6.20833	1.53167	5.29167	1.94443	7.54167	1.10253	4.625	1.63687	6.29167	1.33447	5.38462	1.69887	7.07692	1.09263	4.75	1.51083	5.70833	1.65448	4.68	1.90875	7.64	0.860233	4.91667	1.67649	6	1.4771	5.07143	1.68543
754	锦绣河山	The beautiful rivers and mountains	positive	7.24299	1.28739	6.42056	1.74852	3.67347	1.864	7.34694	1.1646	7.26415	1.34666	6.69811	1.67085	3.375	2.20301	7.5	1.14208	7.22222	1.23879	6.14815	1.79525	3.96	1.45717	7.2	1.19024	7.33929	1.31117	6.53571	1.70522	3.47826	1.95098	7.30435	1.32921	7.13725	1.26522	6.29412	1.80327	3.84615	1.80427	7.38462	1.02282	7.27586	1.36006	6.82759	1.5369	2.72727	2.05382
755	尽欢而散	Split up after having fun	neutral	5.48936	2.02025	5.78723	1.45865	5.56	1.69224	7	1.30931	5.34783	1.87347	5.69565	1.60779	5.38462	1.67516	6.80769	0.938903	5.625	2.18319	5.875	1.32902	5.75	1.72576	7.20833	1.61458	5	2.17945	5.88	1.64114	5.6	1.55456	6.96	1.42829	6.04545	1.7037	5.68182	1.24924	5.52	1.85113	7.04	1.20692	5.53846	2.06621	5.61538	1.85016	5.46154	1.76141
756	尽其所能	To do the best one can	positive	6.32653	1.16168	5.38776	1.45511	7	1.41421	7.65217	0.899812	6.24	1.2	5.24	1.78606	6.82609	1.58551	7.52174	0.730477	6.41667	1.1389	5.54167	1.02062	7.17391	1.23038	7.78261	1.04257	6.19231	1.05903	5.42308	1.27037	7	1.78377	7.95652	0.928256	6.47826	1.27456	5.34783	1.66812	7	0.953463	7.34783	0.775107	6	1.03775	5.28571	1.54066	7	2.19089
757	尽其所有	Offer all sb. owns	neutral	5.7234	1.48474	5.95745	1.75645	5.42308	1.98372	7.21154	1.09072	5.69565	1.22232	5.52174	1.41001	5.51852	2.10074	7.14815	1.06351	5.75	1.72576	6.375	1.97402	5.32	1.8868	7.28	1.13725	5.47826	1.64785	6.13043	1.74002	5.57692	2.02333	7.19231	1.29674	5.95833	1.30148	5.79167	1.7932	5.26923	1.97094	7.23077	0.862911	5.18182	1.25045	5.63636	1.50151	5.5	2.17503
758	尽心尽意	Make the best of your heart	positive	6.52083	1.3207	5.41667	2.17171	6.68	1.42055	7.68	0.957036	6.33333	1.43456	5.70833	2.07426	6.4	1.44338	7.44	0.960902	6.70833	1.19707	5.125	2.27104	6.96	1.3687	7.92	0.909212	6.375	1.31256	5.66667	2.21981	6.96	1.09848	7.68	1.02956	6.66667	1.34056	5.16667	2.14003	6.4	1.65831	7.68	0.9	6	1.3484	6.25	1.60255	6.76923	1.30089
759	尽职尽责	Be conscientious and responsible	positive	6.64583	1.17581	5.83333	1.88311	6.17647	2.38081	8	0.748331	6.76	1.23423	5.76	2.31445	5.25926	2.62521	7.92593	0.729907	6.52174	1.12288	5.91304	1.31125	7.20833	1.5598	8.08333	0.775532	6.64	1.28712	5.64	2.03879	6.34615	2.36546	8.11538	0.863802	6.65217	1.07063	6.04348	1.7183	6	2.43242	7.88	0.6	6.78571	1.18831	5.28571	2.61441	6	2.68901
760	惊奇不已	Amazed	neutral	5.80435	1.3763	6.04348	1.6991	4.91667	1.67374	6.9375	1.26165	5.86364	1.55212	5.81818	1.84226	4.58333	1.86307	6.29167	1.16018	5.75	1.22474	6.25	1.56733	5.25	1.42188	7.58333	1.01795	5.81818	1.22032	6.36364	1.52894	4.69565	1.86924	7.04348	1.49174	5.79167	1.53167	5.75	1.82376	5.12	1.48099	6.84	1.02794	5.6	1.07497	6.1	1.37032	4.09091	2.11918
761	惊天动地	Shaking heaven and earth	positive	6.48889	1.60429	7.17778	1.38644	3.59184	1.92482	7.28571	1.32288	6.54545	2.01724	7.27273	1.35161	3.41667	2.01983	7.20833	1.28466	6.43478	1.12112	7.08696	1.44326	3.76	1.85472	7.36	1.38082	6.43478	1.85438	7.21739	1.53613	3.95833	1.98865	7.20833	1.41357	6.54545	1.3355	7.13636	1.24577	3.24	1.83212	7.36	1.25433	6.5	2.43086	7.33333	1.557	4	2.29624
762	惊喜交加	Pleasantly surprised at	positive	6.28261	1.1482	6.6087	1.32461	5.25	1.76852	7.14583	1.23753	6.09091	1.23091	6.63636	1.21677	5.16667	1.76109	6.95833	0.954585	6.45833	1.06237	6.58333	1.44212	5.33333	1.8098	7.33333	1.46456	6.45833	1.31807	7.08333	1.01795	5.24	1.76257	7	1.32288	6.09091	0.921132	6.09091	1.4445	5.26087	1.81452	7.30435	1.14554	6.25	1.48477	7.16667	1.02986	5.07692	1.89128
763	惊喜若狂	Be wild with joy	positive	7.28571	1.19867	6.86667	1.62946	5.54167	1.85608	7.29167	1.16616	7.18182	1.37559	6.90909	1.70264	5.79167	1.61458	6.95833	1.08264	7.4	0.968904	6.82	1.56087	5.29167	2.07426	7.625	1.1726	7.38462	1.27038	7.05769	1.63795	5.21739	1.73091	7.21739	1.31275	7.18868	1.12757	6.67925	1.61452	5.84	1.95107	7.36	1.03602	7.39286	1.52362	7.53571	1.26146	5.27273	1.79393
764	惊险小说	Thriller novels	neutral	5.41667	1.48515	6.20833	1.28756	4.2	1.70234	7.12	1.04276	5.24	1.33167	5.92	1.22202	4.23077	1.65669	6.76923	1.06987	5.6087	1.64425	6.52174	1.30974	4.16667	1.78561	7.5	0.884652	5.38462	1.38786	6.26923	1.34336	4.20833	1.7932	7.20833	0.977093	5.45455	1.62502	6.13636	1.24577	4.19231	1.64971	7.03846	1.11286	5.28571	1.48989	6.14286	1.35062	4	1.87083
765	晶莹剔透	Glittering and translucent	positive	6.6383	1.42074	5.10638	2.01337	4.8125	1.36298	7.25	1.29648	6.30435	1.66337	4.78261	2.21475	4.33333	1.27404	6.70833	1.23285	6.95833	1.08264	5.41667	1.79169	5.29167	1.30148	7.79167	1.14129	6.86957	1.35862	5.6087	1.87663	4.69565	1.18455	7.34783	1.15242	6.41667	1.47196	4.625	2.06023	4.92	1.52534	7.16	1.43411	6.36364	1.50151	5.45455	2.33939	4.33333	1.30268
766	精精神神	Be in high spirits	positive	6.70833	1.21967	5.52083	1.84494	6.35417	1.3913	7.20833	1.25407	6.8	1.44338	5.72	1.94765	6.125	1.191	6.625	1.27901	6.6087	0.940944	5.30435	1.74342	6.58333	1.55806	7.79167	0.931533	6.79167	1.444	5.54167	2.04257	6.26087	1.5141	7.3913	1.23359	6.625	0.969648	5.5	1.66812	6.44	1.29357	7.04	1.2741	6.84615	1.86396	5.92308	2.17798	6.63636	1.20605
767	精神十足	Full of energy	positive	6.97959	1.12712	5.87755	1.70334	6.22917	1.82465	7.66667	1.01758	7.04	1.13578	6	1.91485	6.04167	1.65448	7.58333	0.880547	6.91667	1.1389	5.75	1.48177	6.41667	1.99819	7.75	1.15156	7.08	1.22202	6.16	1.37477	6.43478	1.80469	7.73913	1.13688	6.875	1.03472	5.58333	1.97631	6.04	1.85921	7.6	0.912871	6.92308	1.38212	6.23077	1.7867	5.91667	2.02073
768	精神衰弱	Mental exhaustion	negative	3.14894	1.06278	4.87234	1.60998	3.48	1.59387	6.9	1.40335	2.96	1.20692	4.84	1.59896	3.72	1.54164	6.64	1.15036	3.36364	0.847711	4.90909	1.65929	3.24	1.64012	7.16	1.59896	3.13043	1.25424	5.13043	1.68696	3.58333	1.66594	7	1.50362	3.16667	0.868115	4.625	1.52693	3.38462	1.55118	6.80769	1.32723	2.84615	1.3445	4.92308	1.5525	3.91667	1.62135
769	精卫填海	A symbol of dogged determination	neutral	5.97917	1.50869	6.16667	1.27719	4.51064	1.82819	6.55319	1.72965	5.91667	1.34864	6.16667	1.16718	4.41667	1.97631	5.66667	1.60615	6.04167	1.68056	6.16667	1.40393	4.6087	1.69864	7.47826	1.344	6	1.60728	6.16	0.986577	4.27273	1.98042	6.63636	1.89097	5.95652	1.4295	6.17391	1.55657	4.72	1.69607	6.48	1.61038	6.30769	1.31559	6.53846	0.967418	4	2.09762
770	镜花水月	A mirage, insubstantial objects	neutral	5.61111	1.72303	5.14815	1.7011	4.11321	1.52745	6.84906	1.40598	5.90741	1.40442	5.25926	1.68439	3.96429	1.55116	6.46429	1.37389	5.31481	1.96021	5.03704	1.72619	4.28	1.51438	7.28	1.33915	5.81132	1.60596	5.03774	1.90103	4.23077	1.65669	6.80769	1.57529	5.41818	1.8226	5.25455	1.49342	4	1.41421	6.88889	1.25064	6.23077	1.2746	5.23077	2.08437	4.21429	1.84718
771	久闻大名	I 've heard so much about you	positive	6.53191	1.29968	6.57447	1.31455	4.59574	1.55563	7.2766	1.15537	6.70833	1.23285	6.58333	1.38051	4.26087	1.60163	7.13043	0.757049	6.34783	1.36877	6.56522	1.27301	4.91667	1.47196	7.41667	1.44212	6.58333	1.31601	6.95833	0.954585	4.56522	1.77933	7.47826	0.947224	6.47826	1.30974	6.17391	1.52709	4.625	1.34528	7.08333	1.31601	6.84615	1.21423	7.07692	0.862316	3.90909	1.57826
772	久仰大名	I've heard a lot about you	positive	6.8125	1.17882	6.33333	1.6927	4.75472	1.86986	7.26415	1.16274	6.83333	1.23945	6.04167	1.89918	4.25	1.89785	6.96429	1.13797	6.79167	1.14129	6.625	1.43898	5.32	1.70098	7.6	1.11803	6.91304	1.20276	6.21739	1.83294	5.07692	1.62291	7	1.29615	6.72	1.17331	6.44	1.58325	4.44444	2.06311	7.51852	0.975483	6.90909	1.13618	6	2.04939	4.5	1.74312
773	酒池肉林	Extravagant orgy	negative	3.11111	1.41778	6.42222	1.43794	4.8125	1.68417	5.52083	2.042	3.31818	1.67293	6.18182	1.33225	4.3913	1.4058	4.78261	1.41282	2.91304	1.12464	6.65217	1.5258	5.2	1.84842	6.2	2.3094	2.86364	1.08213	6.45455	1.29935	4.91304	1.88084	5.56522	1.90278	3.34783	1.66812	6.3913	1.588	4.72	1.51438	5.48	2.20076	3.18182	1.4013	5.90909	1.30035	4.27273	1.84883
774	酒逢知己	People with similar temperament never get bored	positive	6.74038	1.33653	6.52885	1.39316	5.4375	1.91196	7.35417	1.02084	6.28302	1.44618	6.28302	1.48554	4.78261	1.90589	7.08696	0.792754	7.21569	1.02594	6.78431	1.25401	6.04	1.74356	7.6	1.1547	6.78431	1.15436	6.78431	1.06421	5.6087	1.77711	7.56522	1.07982	6.69811	1.50109	6.28302	1.6217	5.28	2.05183	7.16	0.943398	6.34615	1.16421	6.69231	1.22537	5.36364	2.06265
775	酒肉朋友	Fair-weather friends	negative	3.12745	1.22411	5.89216	1.289	5.26	1.70006	7.1	1.34392	3.16981	1.20473	5.64151	1.24181	5.04	1.42829	6.68	1.37598	3.08163	1.2556	6.16327	1.29658	5.48	1.93907	7.52	1.19443	3.03922	1.31089	5.86275	1.24931	4.75	1.32698	6.83333	1.711	3.21569	1.1369	5.92157	1.3393	5.73077	1.88802	7.34615	0.845804	3	1.24035	5.62963	1.18153	4.66667	1.30268
776	酒色财气	Wine, women, avarice and pride -- the four cardinal vices	negative	3.375	1.17826	5.625	1.77002	5	1.5253	6.4	1.6413	3.41667	1.21285	5.70833	1.62799	5.48	1.5308	6.52	1.35769	3.33333	1.16718	5.54167	1.93321	4.52	1.38804	6.28	1.90438	3.25	1.22474	5.83333	2.07818	5	1.58114	6.48	1.63605	3.5	1.14208	5.41667	1.41165	5	1.5	6.32	1.67631	3.16667	1.2673	5.75	2.09436	5.15385	1.95133
777	酒足饭饱	Have dined and wined to satiety	neutral	5.87234	1.48349	5.42553	1.74137	5.95918	1.75546	7.61224	0.953422	5.52174	1.47308	5.47826	1.72862	5.8	1.73205	7.4	0.912871	6.20833	1.444	5.375	1.78916	6.125	1.80127	7.83333	0.963087	5.86957	1.39167	5.47826	1.56291	6.20833	1.17877	7.70833	0.954585	5.875	1.59653	5.375	1.92946	5.72	2.17025	7.52	0.962635	5.36364	1.5667	5.63636	1.85864	6	1.4771
778	酒醉饭饱	Eat and drink to the limit of one's capacity	neutral	5.15217	1.96602	5.71739	1.5153	5.73469	1.69282	6.93878	1.34487	5.18182	2.01509	5.36364	1.61968	5.58333	1.88626	7.125	1.07592	5.125	1.96297	6.04167	1.36666	5.88	1.50886	6.76	1.56205	4.54545	1.79224	5.59091	1.6521	5.5	1.66812	6.95833	1.23285	5.70833	1.98865	5.83333	1.40393	5.96	1.7195	6.92	1.46969	5	2	4.8	1.93218	5.08333	1.97523
779	旧恨新仇	New hatred piled on old	negative	3.00943	1.16697	6.5566	1.30989	4.16667	1.91671	6.91667	1.47076	3.01887	1.3372	6.49057	1.40907	4.41667	1.95419	6.79167	1.17877	3	0.980581	6.62264	1.21254	3.91667	1.88626	7.04167	1.73153	2.68519	1.14635	6.81481	1.28964	3.91304	1.92857	7.08696	1.44326	3.34615	1.10053	6.28846	1.28851	4.4	1.91485	6.76	1.50776	2.40741	1.21716	6.85185	1.53682	4.36364	2.15744
780	旧金山湾	San francisco bay	neutral	5.06977	0.551852	4.37209	1.57394	4.56	1.24802	5.36	1.83792	4.90476	0.436436	4.80952	1.20909	4.28	1.4	5.44	1.55671	5.22727	0.61193	3.95455	1.78558	4.84	1.02794	5.28	2.11187	5	0	3.72727	1.90693	4.70833	1.0417	5.41667	1.74248	5.14286	0.792825	5.04762	0.669043	4.42308	1.4191	5.30769	1.95488	5	0	4.54545	1.63485	4.41667	1.37895
781	救死扶伤	Heal the wounded and rescue the dying	positive	7.02913	1.14152	6.60194	1.1744	5.85714	2.16025	7.46939	1.29264	7.30769	1.12961	6.76923	1.33747	5.32	2.47857	7.52	1.04563	6.7451	1.09258	6.43137	0.964467	6.41667	1.63964	7.41667	1.5299	7.30189	1.13654	6.71698	1.06297	6.04167	2.23566	7.58333	1.21285	6.74	1.0844	6.48	1.28158	5.68	2.11581	7.36	1.38082	7.46429	1.23175	7.03571	1.23175	5.41667	2.77843
782	拘拘束束	Binding bundles	negative	3.67391	0.895776	5.06522	1.34002	4.38776	1.95593	7.14286	0.978945	3.77273	1.02036	4.77273	1.37778	4.91667	1.81579	6.70833	0.624094	3.58333	0.775532	5.33333	1.27404	3.88	1.98578	7.56	1.08321	3.65217	0.775107	5.3913	1.2699	4.65217	2.12365	7.43478	1.07982	3.69565	1.01957	4.73913	1.35571	4.15385	1.80427	6.88462	0.816182	3.72727	0.786245	5	1.34164	5.27273	1.95402
783	居安思危	Be prepared for danger in times of peace	neutral	5.83333	1.57552	5.20833	1.44338	5.76	1.99551	7.4	1.08797	6	1.80278	5.24	1.66533	5.36	1.823	7.2	0.957427	5.65217	1.30065	5.17391	1.19286	6.16	2.11503	7.6	1.19024	5.625	1.83712	5.20833	1.50302	6	1.84842	7.4	1.32288	6.04167	1.26763	5.20833	1.41357	5.52	2.14321	7.4	0.816497	5.92308	2.21591	5.15385	1.81871	5.61538	2.06311
784	举止端庄	As graceful as a swan	positive	6.70833	0.849489	4.64583	2.06789	6.39583	1.52622	7.5625	0.920366	6.875	0.740887	4.625	2.35561	6.41667	1.66594	7.41667	0.928611	6.54167	0.931533	4.66667	1.78561	6.375	1.40844	7.70833	0.907896	6.91304	0.949308	4.3913	2.42598	6.52174	1.3774	7.56522	0.992063	6.52	0.714143	4.88	1.69115	6.28	1.67133	7.56	0.869866	7.09091	0.831209	4	2.96648	6.58333	1.62135
785	举止失措	Chokeable	negative	3.48485	0.884834	5.71717	1.01056	4.81633	1.71602	6.95918	1.3988	3.64	0.851409	5.48	0.99468	5.23077	1.47804	6.76923	1.42289	3.32653	0.89879	5.95918	0.978076	4.34783	1.87347	7.17391	1.37021	3.32	0.957036	5.82	0.962353	4.36	1.68028	6.88	1.58955	3.65306	0.778648	5.61224	1.05705	5.29167	1.65448	7.04167	1.19707	3.56	0.820569	5.4	0.866025	4.78571	1.57766
786	拒人千里	Unapproachable	negative	3.02222	1.37327	6.02222	1.54462	6.04167	2.08294	7.1875	1.70925	3.14286	1.42428	5.90476	1.22085	6.26087	1.76371	7.13043	1.01374	2.91667	1.34864	6.125	1.80127	5.84	2.35726	7.24	2.1848	3.04167	1.57367	5.79167	1.93321	6.20833	2.04257	7.20833	1.76879	3	1.14018	6.28571	0.902378	5.875	2.15311	7.16667	1.6854	3	1.53741	5.83333	1.58592	6.5	1.67874
787	据为己有	Take forcible possession of	negative	3.06731	1.26387	6.13462	1.19917	6.70833	1.35204	7.29167	1.21967	2.87037	1.24455	5.96296	1.34533	6.5	1.50362	7.08333	1.34864	3.28	1.26233	6.32	0.998775	6.91667	1.17646	7.5	1.06322	3	1.18322	6.09804	1.13587	6.79167	1.66757	7.45833	1.06237	3.13208	1.34504	6.16981	1.26697	6.625	0.969648	7.125	1.36135	2.88889	1.31071	6.03704	1.31505	6.41667	1.83196
788	聚沙成塔	Many littles make a mickle	neutral	5.84783	1.4137	5.84783	1.24664	5.76596	1.65782	6.53191	1.67917	5.73913	1.57299	5.78261	1.1264	5	1.62369	5.91304	1.56417	5.95652	1.26053	5.91304	1.37883	6.5	1.35133	7.125	1.59653	5.91667	1.44212	5.58333	0.928611	5.63636	1.83991	6.54545	1.89554	5.77273	1.41192	6.13636	1.4895	5.88	1.50886	6.52	1.50333	5.69231	1.6525	5.92308	0.954074	4.36364	1.74773
789	绝非偶然	It is no accident	neutral	4.84091	0.805307	5.54545	1.43793	4.56522	1.52974	6.86957	1.25802	4.77273	0.869144	5.68182	1.12911	4.52174	1.59173	6.43478	1.16096	4.90909	0.75018	5.40909	1.70878	4.6087	1.49967	7.30435	1.22232	4.90909	0.526361	5.36364	1.329	4.5	1.79284	6.81818	1.50036	4.77273	1.02036	5.72727	1.54863	4.625	1.27901	6.91667	1.01795	4.83333	0.717741	5.66667	1.30268	4.72727	1.79393
790	绝无此事	No matter	neutral	4.53883	0.876405	5.3835	1.18447	5.10204	1.61045	7.08163	1.4554	4.75	0.763763	5.34615	1.00751	5.08333	1.71735	6.91667	1.34864	4.32353	0.937142	5.42157	1.35045	5.12	1.53623	7.24	1.56205	4.55882	0.711667	5.40196	1.10462	4.91667	1.71735	7.375	1.27901	4.51923	1.01923	5.36538	1.26845	5.28	1.51438	6.8	1.58114	4.7037	0.724028	5.51852	1.15593	5	1.90693
791	绝无此意	Have absolutely no such intentions	neutral	4.68085	1.16295	5.55319	1.44175	5.18367	1.61598	7	1.41421	4.86957	0.814881	5.13043	0.694416	5.32	1.34536	6.76	1.53514	4.5	1.41421	5.95833	1.82921	5.04167	1.87615	7.25	1.25974	4.875	1.191	5.5	1.53226	5.04	1.7195	6.72	1.69607	4.47826	1.12288	5.6087	1.37309	5.33333	1.52277	7.29167	0.999094	5	0.852803	4.83333	0.57735	5.30769	1.54837
792	军令如山	Milirary orders are important	neutral	5.43689	1.15189	6	1.28338	2.625	2.13008	7.29167	1.27092	5.82692	1.23226	6.09615	1.40391	3	2.41523	7	1.47196	5.03922	0.915659	5.90196	1.15334	2.21739	1.73091	7.6087	0.940944	5.4717	1.18652	6.0566	1.1671	2.54167	1.95558	7.08333	1.21285	5.4	1.12486	5.94	1.40567	2.70833	2.33087	7.5	1.31876	5.84615	1.25514	6.42308	1.13747	2.23077	1.64083
793	开诚相见	Open one's heart to sb.	positive	6.83333	1.09803	5.60417	1.72268	5.95833	1.95653	7.22917	1.01561	6.88	1.23558	5.88	1.73973	5.21739	2.35404	7.13043	0.919701	6.78261	0.951388	5.30435	1.69048	6.64	1.18603	7.32	1.10755	6.70833	1.12208	5.33333	1.78561	5.69565	2.26505	7.17391	0.936734	6.95833	1.08264	5.875	1.6501	6.2	1.63299	7.28	1.1	6.69231	1.03155	5.61538	1.75777	4.63636	2.69343
794	开卷有益	Reading is always profitable	positive	6.4	1.03404	5.21905	1.51899	5.125	2.05897	7.1875	1.43892	6.09615	1.01479	5.30769	1.3938	3.91304	1.50493	6.69565	1.42812	6.69811	0.972406	5.13208	1.64127	6.24	1.87705	7.64	1.31909	6.42	1.08965	5.18	1.38048	5.16667	2.03591	6.75	1.75078	6.38182	0.990528	5.25455	1.64675	5.08333	2.12473	7.625	0.875388	5.95833	1.12208	5.08333	1.34864	3.58333	1.08362
795	开门办学	Carry out open-door education	neutral	5.72917	0.868836	4.54167	2.01017	5.04	2.09917	6.76	1.66059	5.83333	0.868115	4.95833	1.65448	4.52	2.0025	7.04	0.978093	5.625	0.875388	4.125	2.27104	5.56	2.10317	6.48	2.12368	5.69565	0.76484	3.82609	2.16695	4.83333	2.21981	6.75	1.67462	5.76	0.969536	5.2	1.63299	5.23077	2.00614	6.76923	1.68066	5.81818	0.873863	4.27273	1.90215	4.08333	2.31432
796	开山祖师	Founder of a religious sect or a school of thought	positive	6.16327	1.29658	5.36735	2.0886	3.74	1.83848	6.2	1.85164	6.12	1.26886	5.24	1.96384	3.24	1.47986	5.64	1.823	6.20833	1.35066	5.5	2.24577	4.24	2.04695	6.76	1.73877	6.15385	1.1897	5.11538	2.14153	3.75	1.77544	6	2.02162	6.17391	1.43502	5.65217	2.03623	3.73077	1.92993	6.38462	1.69887	6.28571	1.13873	5.28571	2.33464	3.08333	1.67649
797	慷慨悲歌	Chant in a heroic but mournful tone	neutral	4.68868	1.86376	6.53774	1.27372	4.73469	1.74135	6.71429	1.79118	5.37037	2.09488	6.59259	1.28149	4.5	1.79371	6.29167	2.01039	3.98077	1.2601	6.48077	1.27557	4.96	1.69509	7.12	1.48099	4.45455	1.84409	6.49091	1.24533	4.64	1.9975	6.96	1.94679	4.94118	1.86989	6.58824	1.31418	4.83333	1.46456	6.45833	1.61458	4.96429	2.09907	6.67857	1.09048	4.38462	2.39925
798	慷慨陈词	Declaim	positive	6.10256	1.33367	6.94872	1.1227	5.86667	1.79139	7.24444	1.13128	5.90476	1.41084	6.47619	0.872872	5.6087	1.85225	6.95652	1.02151	6.33333	1.23669	7.5	1.15045	6.13636	1.72642	7.54545	1.18431	5.75	1.39044	6.625	1.40831	5.73913	2.11526	7.13043	1.32474	6.34783	1.26522	7.17391	0.834058	6	1.41421	7.36364	0.902138	5.1	1.19722	6.2	1.0328	5.25	2.37888
799	慷慨就义	Go to one's death like a hero	neutral	5.17925	2.25852	7.17925	1.23286	4.97872	2.5833	7.3617	1.22342	5.22642	2.62855	7.39623	1.23007	4.78261	2.77909	7.26087	1.32175	5.13208	1.84013	6.96226	1.20834	5.16667	2.42571	7.45833	1.14129	5.11111	2.40021	7.40741	1.12466	5.04167	2.56191	7.25	1.45213	5.25	2.12248	6.94231	1.30479	4.91304	2.66139	7.47826	0.947224	4.74074	2.7955	7.74074	1.05948	4.83333	2.91807
800	烤羊肉串	Shish kebab; barbecue	neutral	5.78641	1.21793	5.53398	1.42674	6.02128	2.22133	7.76596	0.937452	5.21569	0.878948	5.19608	1.05867	4.65217	1.96813	7.21739	0.795243	6.34615	1.25064	5.86538	1.65718	7.33333	1.57885	8.29167	0.750604	5.92157	1.14618	5.56863	1.33049	6	2.20389	7.72727	0.984732	5.65385	1.28161	5.5	1.52753	6.04	2.28181	7.8	0.912871	5.23077	1.0318	5.19231	1.32723	4.72727	2.00454
801	靠水吃水	Living from what the land and sea can give	neutral	5.21739	0.786357	4.5	1.58815	3.73469	1.83457	6.85714	1.59426	5.21739	0.599736	5	1.12815	4	2.3094	7.16	1.17898	5.21739	0.951388	4	1.83402	3.45833	1.14129	6.54167	1.91059	5.20833	0.883627	4.5	1.81779	4.20833	2.08471	6.95833	1.62799	5.22727	0.685344	4.5	1.33631	3.28	1.45831	6.76	1.5885	5.16667	0.57735	5.08333	1.37895	4.84615	2.54448
802	科学史家	History of science	neutral	5.2093	0.674648	4.67442	1.50746	4.61224	1.60489	6.57143	1.5411	5.15	0.67082	5	1.21395	4.625	1.52693	6.33333	1.23945	5.26087	0.6887	4.3913	1.69864	4.6	1.70783	6.8	1.77951	5.09524	0.436436	4.2381	1.48003	4.73913	1.25109	6.21739	1.88189	5.31818	0.838727	5.09091	1.4445	4.5	1.88149	6.88462	1.10732	4.9	0.316228	4.6	1.17379	4.72727	1.61808
803	刻苦耐劳	Industriousness and stamina	positive	6.59434	1.1108	5.70755	1.47336	6.66667	1.53447	7.70833	0.849489	6.72222	1.17227	6.18519	1.38828	6.41667	1.76725	7.625	0.875388	6.46154	1.03775	5.21154	1.40498	6.91667	1.24819	7.79167	0.832971	6.63462	1.20504	5.65385	1.34142	6.83333	1.40393	7.75	0.944089	6.55556	1.02178	5.75926	1.60112	6.5	1.66812	7.66667	0.761387	6.59259	1.30853	6.22222	1.39596	6.5	1.78377
804	刻舟求剑	Take measures without attention to the changes in circumstances	neutral	4.88889	1.36885	4.91111	1.56412	4.83673	1.55921	7.02041	1.52055	4.91304	0.99604	4.95652	1.4295	4.84	1.46287	6.36	1.60416	4.86364	1.69861	4.86364	1.72642	4.83333	1.6854	7.70833	1.08264	4.82609	1.49703	4.82609	1.77488	4.68	1.51987	6.84	1.74833	4.95455	1.2527	5	1.34519	5	1.61515	7.20833	1.25036	5	1.2792	4.75	1.95982	4.46154	1.71345
805	恪尽职守	Strictly observe one's duty	positive	6.57447	1.11793	5.23404	1.68385	5.89796	2.06403	7.44898	0.818057	6.5	1.25109	5.45833	1.76879	5.5	2.18692	7.33333	0.761387	6.65217	0.982052	5	1.59545	6.28	1.90438	7.56	0.869866	6.625	1.40844	5.08333	1.79169	5.69565	2.00986	7.30435	0.558796	6.52174	0.730477	5.3913	1.588	6.07692	2.13397	7.57692	0.986836	6.38462	1.66024	5.69231	2.05688	5.27273	2.00454
806	客死他乡	Die abroad	negative	2.57692	1.12079	6.54808	1.33569	3.29167	1.82137	6.91667	1.67374	2.66667	1.18162	6.40741	1.33909	3.83333	1.83366	6.375	1.71471	2.48	1.05444	6.7	1.32865	2.75	1.67462	7.45833	1.47381	2.28302	1.16648	6.77358	1.26554	3.17391	1.6693	6.91304	1.97514	2.88235	0.992916	6.31373	1.37826	3.4	1.97906	6.92	1.38203	2.46429	1.34666	6.60714	1.19689	4	1.90693
807	课外辅导	Instruction after class	neutral	4.76699	0.842544	4.93204	1.22284	4.44681	1.93153	7.25532	1.13191	5.08	0.444467	4.92	1.08496	3.625	1.09594	7.04167	0.954585	4.4717	1.01154	4.9434	1.35043	5.30435	2.24489	7.47826	1.27456	4.65385	0.837471	4.86538	1.40068	4.82609	1.94591	7	1.31426	4.88235	0.840168	5	1.0198	4.08333	1.88626	7.5	0.884652	5	0.408248	4.76	1.33167	4	1.20605
808	课外作业	Homework	neutral	4.4898	0.922177	5.03061	1.17055	4.57447	2.13404	7.70213	1.0197	4.97872	0.328988	4.82979	0.66982	4.41667	1.69184	7.41667	0.974308	4.03922	1.05756	5.21569	1.47396	4.73913	2.54447	8	1	4.4375	1.02949	5.125	1.04423	4.75	2.2506	7.79167	1.06237	4.54	0.813408	4.94	1.28428	4.3913	2.03914	7.6087	0.988071	5	0	4.69565	0.87567	4.53846	1.89804
809	坑坑洼洼	Bumpy	negative	3.86957	0.805776	5.08696	1.20786	4	1.5253	7.22	1.28238	3.82609	0.886883	5.08696	1.41142	3.76	1.76257	7.04	1.09848	3.91304	0.733178	5.08696	0.99604	4.24	1.23423	7.4	1.44338	3.88	1.01325	5.04	1.20692	4.16667	1.40393	6.91667	1.55806	3.85714	0.478091	5.14286	1.23635	3.84615	1.64176	7.5	0.905539	3.92308	1.11516	5.07692	1.38212	3.75	1.71226
810	口出怨言	Grumble	negative	3.14706	0.958516	6.03922	0.866558	5.25	1.96241	7.16667	1.31008	3.30769	1.0392	5.96154	0.884763	5.41667	1.66594	6.91667	1.05981	2.98	0.844913	6.12	0.848528	5.08333	2.24416	7.41667	1.50121	3.03704	0.950927	6.07407	0.908074	5.36	1.89033	7.04	1.61967	3.27083	0.961815	6	0.825137	5.13043	2.07374	7.30435	0.87567	3.10714	0.875142	6	1.08866	5.23077	2.0064
811	口传心授	Oral teaching that inspires true understanding within	neutral	5.79167	1.051	5.125	1.68378	5.03846	1.99962	7.21154	1.21003	5.96	1.05987	5.52	1.50333	4.59259	2.0987	6.96296	1.01835	5.6087	1.03305	4.69565	1.79481	5.52	1.80555	7.48	1.35769	6.12	1.1299	5.52	1.71075	5.23077	2.21464	7.07692	1.38342	5.43478	0.843482	4.69565	1.57926	4.84615	1.78196	7.34615	1.01754	6.07692	1.25576	6.15385	1.28103	4.57143	2.40878
812	口耳相传	Teach orally	neutral	5.23762	0.81423	4.88119	1.12505	4.83673	1.78357	7.04082	1.22405	5.28571	0.645497	4.91837	0.731344	4.79167	1.84106	6.91667	1.05981	5.19231	0.95051	4.84615	1.40566	4.88	1.76352	7.16	1.37477	5.18	0.690755	4.92	0.853325	5	2.06155	7.28	1.17331	5.29412	0.922911	4.84314	1.34718	4.66667	1.46456	6.79167	1.25036	5.24	0.597216	5.04	0.61101	5	2.19848
813	口服心服	Sincerely convinced	positive	6.38298	1.17127	6.25532	1.16969	5.06383	2.2205	7.65957	0.984148	6.52174	1.08165	6.47826	1.16266	5.13043	2.20133	7.30435	0.97397	6.25	1.25974	6.04167	1.16018	5	2.28416	8	0.884652	6.48	1.38804	6.52	1.08474	5.91304	1.90485	7.52174	1.12288	6.27273	0.882735	5.95455	1.21409	4.25	2.2312	7.79167	0.832971	6.53846	1.39137	6.69231	1.1094	5.90909	2.3002
814	口蜜腹剑	A cruel heart under the cover of sugar-coated words	negative	2.40426	1.17324	6.80851	1.19124	4.31915	1.795	6.82979	1.32401	2.24	1.26754	7	1.25831	4.70833	1.78104	6.625	1.09594	2.59091	1.05375	6.59091	1.09801	3.91304	1.75585	7.04348	1.52191	2.08	1.07703	7.16	1.28062	4.09091	1.63034	6.81818	1.50036	2.77273	1.19251	6.40909	0.959121	4.52	1.93907	6.84	1.17898	1.78571	0.801784	7.42857	1.45255	4.45455	1.69491
815	口说无凭	Words alone are no proof	neutral	4.15217	0.988093	5.56522	1.51514	4.94	1.671	7.04	1.08722	4.34783	0.831685	5.34783	1.43364	5.04	1.56738	6.84	1.24766	3.95652	1.10693	5.78261	1.59421	4.84	1.79536	7.24	0.879394	4.16667	1.23945	5.41667	1.71735	4.68	1.65126	7.12	1.16619	4.13636	0.639602	5.72727	1.2792	5.2	1.68325	6.96	1.0198	4.33333	0.887625	5.08333	1.78164	4.84615	1.67562
816	枯枝败叶	Dead twigs and withered leaves	negative	3.31915	1.02377	5.19149	1.24479	4.5	1.54193	7.04	1.12413	3.16	1.10604	5.16	1.43411	4.11538	1.60815	6.96154	1.21592	3.5	0.912871	5.22727	1.02036	4.91667	1.38051	7.125	1.03472	3.16	0.986577	5.4	1.38444	4.44	0.916515	6.8	1.11803	3.5	1.05785	4.95455	1.0455	4.56	2.00167	7.28	1.1	3.21429	1.18831	5.5	1.6525	4.28571	1.06904
817	哭哭啼啼	Weep and sob	negative	2.61224	1.07657	6.30612	1.63559	4.92308	1.78057	7.32692	1.06128	2.44	1.04403	6.36	1.8	5	1.86052	7.22222	1.01274	2.79167	1.10253	6.25	1.48177	4.84	1.72434	7.44	1.12101	2.24	1.0116	6.72	1.51438	4.84615	1.8263	7.26923	1.15092	3	1.02151	5.875	1.67624	5	1.76635	7.38462	0.982931	1.92308	0.759555	6.92308	1.75412	4.57143	1.94992
818	哭天喊地	Cry bitterly	negative	2.63043	1.18056	6.30435	1.81193	4.40816	1.99915	7	1.3994	2.73913	1.32175	5.86957	2.15964	4.64	1.86815	6.88	1.20139	2.52174	1.03877	6.73913	1.28691	4.16667	2.14003	7.125	1.59653	2.45455	1.22386	6.18182	1.91824	4.32	1.8868	6.92	1.6052	2.79167	1.14129	6.41667	1.74248	4.5	2.14679	7.08333	1.17646	2.3	1.33749	5.7	2.58414	4.21429	1.52812
819	哭天抹泪	Wail and whine	negative	2.93617	0.986964	5.87234	1.9067	4.97917	2.14862	7.0625	1.2784	3.04167	1.12208	5.20833	1.97768	5.33333	2.20013	7.08333	0.775532	2.82609	0.834058	6.56522	1.59049	4.625	2.08123	7.04167	1.65448	2.82609	1.02922	5.95652	1.94184	5.29167	2.17654	7.25	1.07339	3.04167	0.954585	5.79167	1.91059	4.66667	2.11961	6.875	1.454	2.81818	1.16775	5.45455	2.0181	5.5	2.11058
820	苦大仇深	Have suffered bitterly in the old society and have a deep class hatred	negative	2.96	1.28645	6.42	1.37936	4.04167	1.91254	6.95833	1.87887	3.1	1.46036	6.48	1.38858	4.25	2.21163	6.75	2.00543	2.82	1.08214	6.36	1.38151	3.83333	1.57885	7.16667	1.76109	2.69388	1.26168	6.67347	1.1436	4.16667	2.14003	7.08333	2.1451	3.21569	1.26986	6.17647	1.54539	3.91667	1.69184	6.83333	1.60615	2.5	1.31876	6.91667	1.17646	4.30769	2.59437
821	苦海无边	Boundless bitternesss	negative	3.28571	1.25357	5.66667	1.71345	3.5625	1.78536	6.79167	1.67533	3.03774	1.30033	5.75472	1.94052	3.76	1.85472	6.28	2.05183	3.53846	1.16251	5.57692	1.45987	3.34783	1.72175	7.34783	0.884652	3.06	1.13227	5.78	1.66953	3.375	1.71471	6.66667	1.60615	3.49091	1.33156	5.56364	1.76135	3.75	1.87083	6.91667	1.76725	2.84	1.28062	6	1.95789	3.69231	2.13638
822	苦尽甜来	Bitterness ends and happiness begins	positive	7.17778	1.02888	6.31111	1.7558	5.24	2.09528	7.66	0.960655	7.24	1.12842	6.16	2.17332	4.55556	2.06311	7.48148	0.893152	7.1	0.91191	6.5	1.05131	6.04348	1.8703	7.86957	1.01374	7.14286	1.01419	6.09524	1.81397	5.65385	1.97873	7.57692	1.02657	7.20833	1.06237	6.5	1.71945	4.79167	2.16653	7.75	0.896854	7.23077	1.01274	6.23077	2.20431	5.14286	2.0327
823	苦思苦想	Think hard	neutral	4.48889	1.1798	5.26667	1.40454	5.81633	1.62882	7.02041	1.39179	4.56522	1.40861	5.04348	1.60902	6	1.41421	6.91667	0.928611	4.40909	0.908116	5.5	1.14434	5.64	1.823	7.12	1.73973	4.18182	1.18065	5.36364	1.25529	5.73913	1.60163	6.86957	1.76595	4.78261	1.1264	5.17391	1.55657	5.88462	1.68112	7.15385	0.967153	4.09091	1.3751	5.09091	1.6404	6.09091	1.51357
824	夸父逐日	A braggadocio, miscalculating his strength, conceived the vain ambition of overtaking the fleeting rays of the sun	neutral	5.35556	1.1512	5.71111	1.44005	4.7	1.64441	6.64	1.97701	5.19048	0.813575	5.42857	0.810643	4.44	1.55671	5.92	2.03961	5.5	1.38313	5.95833	1.80529	4.96	1.7195	7.36	1.65529	5.08696	1.16436	5.56522	1.67403	4.28	1.67133	6.16	2.37487	5.63636	1.09307	5.86364	1.16682	5.12	1.53623	7.12	1.36382	5.18182	0.98165	5.54545	1.03573	3.92308	1.84669
825	夸下海口	Exaggerate the mouth of the sea	negative	3.85714	1.36931	5.46939	1.41572	5.36735	1.82225	7.04082	1.45715	3.88	1.36382	5.36	1.41067	5.25	1.84744	6.66667	1.711	3.83333	1.40393	5.58333	1.44212	5.48	1.82848	7.4	1.08012	3.65385	1.26309	5.61538	1.49872	5.32	2.03552	6.96	1.81384	4.08696	1.47442	5.30435	1.32921	5.41667	1.6129	7.125	0.991814	3.71429	1.20439	5.42857	1.55486	4.92308	2.326
826	快步如飞	Fast paced	positive	6.25962	1.13202	6.18269	1.48628	6.69388	1.26168	7.38776	1.13314	6.52941	1.10187	6.52941	1.20587	6.5	1.52971	7.46154	1.02882	6	1.1094	5.84906	1.65711	6.91304	0.848155	7.30435	1.25896	6.30189	1.16989	6.32075	1.5414	6.91667	0.928611	7.45833	0.977093	6.21569	1.10116	6.03922	1.42774	6.48	1.50333	7.32	1.28193	6.55556	1.31071	6.48148	1.50308	7	1
827	快快乐乐	Happy	positive	7.27358	1.15084	6.08491	2.17395	6.79592	1.60701	8	0.889757	7.36538	1.17204	6.32692	2.25546	6.75	1.15156	7.875	0.946963	7.18519	1.13394	5.85185	2.08686	6.84	1.97231	8.12	0.832666	7.38462	1.23913	6.34615	1.96922	6.68	1.40594	8.12	0.881287	7.16667	1.05955	5.83333	2.34521	6.91667	1.81579	7.875	0.899879	7.64	1.15036	7	1.89297	6.84615	1.40512
828	狂风恶浪	Fierce storm	negative	2.61702	1.18969	6.38298	1.99514	2.54167	1.33621	7.39583	1.02604	2.47826	1.12288	5.86957	2.36075	2.58333	1.58572	7.25	1.03209	2.75	1.25974	6.875	1.454	2.5	1.06322	7.54167	1.02062	2.43478	1.19947	6.69565	1.84477	2.66667	1.52277	7.25	1.22474	2.79167	1.17877	6.08333	2.12473	2.41667	1.1389	7.54167	0.779028	2.54545	1.29334	6.54545	1.86353	2.75	1.71226
829	狂风怒号	A violent wind is howling	negative	3.2	1.27208	6.58889	1.23991	2.85417	1.36817	7.08333	1.16388	3.04167	1.16018	6.20833	1.444	2.79167	1.61458	6.875	1.2959	3.38095	1.39557	7.02381	0.782243	2.91667	1.10007	7.29167	0.999094	3.22727	1.57153	6.70455	1.09826	2.58333	1.38051	7.08333	1.24819	3.17391	0.936734	6.47826	1.3774	3.125	1.32902	7.08333	1.10007	3	1.3484	6.75	1.3568	2.41667	1.72986
830	旷世奇才	A remarkable talent of many age	positive	7.38298	1.03321	6.7234	1.62457	4.73469	1.80018	6.95918	1.41361	7.48	1.00499	6.64	1.7767	3.88	1.53623	6.32	1.43527	7.27273	1.07711	6.81818	1.46828	5.625	1.63687	7.625	1.05552	7.45833	1.17877	6.91667	1.55806	4.41667	1.76725	6.75	1.70038	7.30435	0.87567	6.52174	1.70213	5.04	1.81384	7.16	1.06771	7.69231	0.947331	6.92308	1.65638	3.41667	1.37895
831	昆仑山口	Kunlun mountain pass	neutral	4.97826	0.829702	4.21739	1.42849	3.62	1.60217	6.04	2.36436	4.95833	1.12208	4.58333	0.974308	3.48	1.73494	6.04	2.3	5	0.308607	3.81818	1.7358	3.76	1.47986	6.04	2.47454	4.91667	1.1389	4.16667	1.6594	3.76	1.61452	5.8	2.51661	5.04545	0.213201	4.27273	1.16217	3.48	1.61038	6.28	2.22711	4.84615	1.51911	4.30769	1.25064	3.46154	1.76141
832	拉帮结伙	Collude with	negative	3.15217	1.21046	6	1.60555	5.26531	1.97669	6.91837	1.5253	2.91304	1.20276	6.30435	1.32921	5.28	2.24574	6.6	1.77951	3.3913	1.19617	5.69565	1.81996	5.25	1.70038	7.25	1.15156	3.09091	1.1916	6.22727	1.19251	5.52	1.89561	7.04	1.61967	3.20833	1.25036	5.79167	1.91059	5	2.06419	6.79167	1.444	2.72727	1.10371	6.54545	1.03573	5.38462	2.10311
833	拉扯成人	Raised	neutral	5.3125	1.1328	5.72917	1.6978	4.76	1.8578	7.32	0.998775	5.72	1.30767	5.72	1.54164	5.38462	1.6267	7.19231	0.980581	4.86957	0.694416	5.73913	1.88818	4.08333	1.88626	7.45833	1.02062	5.32	1.06927	6.08	1.63095	5.04	1.96808	7.48	1.00499	5.30435	1.22232	5.34783	1.72175	4.48	1.73494	7.16	0.986577	5.61538	1.3253	6.30769	1.4367	5.30769	1.93152
834	拉家带口	Have family burden	neutral	4.07447	1.22465	5	1.4295	4.32653	1.80725	7.20408	1.2413	4	1.31876	4.70833	1.60106	4.25	1.64845	7.125	1.03472	4.15217	1.14251	5.30435	1.18455	4.4	1.97906	7.28	1.42945	4.02083	1.35518	4.75	1.59483	4.21739	1.83294	7.30435	1.60779	4.13043	1.09977	5.26087	1.21421	4.42308	1.8149	7.11538	0.816182	4	1.47196	4.61538	1.80455	4.45455	2.11488
835	拉下脸来	Pull down your face	negative	3.29787	1.08176	5.6383	1.53829	5.41667	2.04037	7.25	1.08176	3.21739	1.16605	5.08696	1.70329	6.13043	1.6041	7.08696	1.04067	3.375	1.0135	6.16667	1.16718	4.76	2.20378	7.4	1.11803	3.3913	0.988071	5.47826	1.47308	5.36	2.03879	7.2	1.22474	3.20833	1.17877	5.79167	1.61458	5.47826	2.08609	7.30435	0.926125	3	0.894427	5	1.78885	6	1.63299
836	腊月三十	The chinese new year's eve	positive	6.19811	1.33395	5.79245	2.1054	4.10204	2.24764	7.7551	1.42201	5.92308	1.21826	5.80769	1.68078	3.52	2.25684	7.64	1.25433	6.46296	1.39694	5.77778	2.46229	4.70833	2.11576	7.875	1.59653	6.17308	1.368	5.78846	2.09889	3.76	2.29637	7.76	1.5885	6.22222	1.31273	5.7963	2.13134	4.45833	2.1865	7.75	1.25974	5.8	1.1547	5.6	1.87083	2.84615	2.23033
837	蓝领工人	Blue-collar	neutral	5.13333	0.587754	4.8	1.09959	4.5102	1.37117	6.81633	1.57683	5.18182	0.394771	4.86364	1.12527	4.08	1.63095	6.88	1.23558	5.08696	0.733178	4.73913	1.09617	4.95833	0.858673	6.75	1.89393	5.04762	0.384212	4.7619	1.17918	4.73913	1.25109	6.30435	1.7693	5.20833	0.72106	4.83333	1.0495	4.30769	1.4634	7.26923	1.25085	5	0	4.7	1.56702	4.33333	1.49747
838	狼吞虎咽	Gobble	neutral	4.23913	1.19601	5.97826	1.2559	6	1.84506	7.60417	0.961815	4.17391	1.19286	5.6087	1.49967	5.75	1.84744	7.41667	1.01795	4.30435	1.22232	6.34783	0.831685	6.25	1.84744	7.79167	0.883627	4.09091	1.1916	5.77273	1.37778	5.66667	1.9708	7.70833	1.0417	4.375	1.20911	6.16667	1.12932	6.33333	1.6854	7.5	0.884652	3.8	1.31656	5.4	1.83787	5.33333	1.92275
839	狼烟四起	Warning signals of approaching enemy forces are seen on all sides	negative	3.55319	1.52954	6.44681	1.65251	3.29167	1.77402	6.89583	1.20706	3.17391	1.37021	5.86957	1.98413	3.29167	1.73153	6.5	1.14208	3.91667	1.6129	7	1.02151	3.29167	1.85283	7.29167	1.16018	3.13636	1.45718	6.72727	1.57908	2.91304	1.70329	7	1.41421	3.92	1.52534	6.2	1.70783	3.64	1.8	6.8	1	2.5	1.08012	6.4	2.01108	2.72727	1.42063
840	朗朗乾坤	As bright as sun and moon	positive	6.29167	1.25407	5.45833	1.63679	3.76	1.75616	6.74	1.63894	6.44	1.26095	5.36	1.86815	3.4	1.75594	6.72	1.79165	6.13043	1.25424	5.56522	1.37597	4.12	1.71561	6.76	1.50776	6.48	1.22882	5.44	1.68523	3.96	2.07123	6.72	1.79165	6.08696	1.27611	5.47826	1.62003	3.56	1.38684	6.76	1.50776	6.71429	0.99449	5.35714	2.09788	3.46154	2.06621
841	浪迹江湖	Wander about	neutral	5.29524	1.36525	5.8	1.07775	5.9375	2.00432	7.22917	1.20706	4.64151	1.0395	5.45283	0.931625	5	1.95604	6.79167	1.17877	5.96154	1.34254	6.15385	1.1094	6.875	1.59653	7.66667	1.09014	5.27778	1.37932	5.7963	0.876951	6.13043	1.84155	7.13043	1.21746	5.31373	1.36367	5.80392	1.26522	5.76	2.16564	7.32	1.21518	4.53571	1.0709	5.5	0.745356	5.36364	2.11058
842	劳务出口	Export of labor services	neutral	4.80952	0.551632	4.88095	1.01699	4.41667	1.51353	6.0625	1.91751	5	0.324443	4.85	1.08942	4.04348	1.63702	6.30435	1.32921	4.63636	0.657952	4.90909	0.971454	4.76	1.33167	5.84	2.33952	4.86364	0.560226	4.86364	1.16682	4.43478	1.67403	6	2.0226	4.75	0.55012	4.9	0.852242	4.4	1.38444	6.12	1.85562	5	0.447214	4.72727	1.48936	3.90909	1.97254
843	老不死的	Old farts	negative	2.38298	1.20782	6.57447	1.99722	4.54	1.59348	6.84	1.4619	2.16667	1.20386	6.33333	2.38959	4.44	1.70978	6.4	1.73205	2.6087	1.19617	6.82609	1.49703	4.64	1.49666	7.28	0.979796	2.08696	1.34547	7	2.3355	4.52	1.55778	7.12	1.0924	2.66667	1.00722	6.16667	1.55106	4.56	1.66032	6.56	1.73397	1.83333	1.19342	6.83333	2.94906	4.61538	1.93815
844	老虎屁股	Sth. tetchy	negative	3.97872	1.05273	5.65957	1.6455	3.61702	1.63592	7.02128	1.63507	3.79167	1.14129	5.5	1.47442	3.6087	1.72519	6.56522	1.80469	4.17391	0.936734	5.82609	1.82538	3.625	1.58286	7.45833	1.35066	3.81818	1.05272	5.68182	1.72892	3.54167	1.66757	6.625	2.08123	4.12	1.05357	5.64	1.60416	3.69565	1.63581	7.43478	0.843482	3.63636	1.28629	5.45455	1.50756	3.41667	1.92865
845	老花眼镜	Old eyeglasses	neutral	5	0.632456	4.46341	1.51818	5.20833	1.98889	7.33333	1.40415	4.95	0.223607	5.1	0.552506	4.45833	1.64129	7.375	1.13492	5.04762	0.86465	3.85714	1.87845	5.95833	2.05319	7.29167	1.65448	5	0	4.57895	1.74215	5.34783	2.05843	7.56522	1.27301	5	0.872872	4.36364	1.329	5.08	1.95619	7.12	1.50886	5	0	5.2	0.632456	4.45455	2.11488
846	老老少少	Old and young	neutral	5.1087	0.640426	4.86957	1.20386	4.67391	1.47655	7.21739	1.31509	5.22727	0.751622	5.18182	0.852803	3.95652	1.36443	7.17391	0.936734	5	0.510754	4.58333	1.41165	5.3913	1.23359	7.26087	1.62976	5.22727	0.685344	4.90909	1.1916	4.59091	1.36832	7.36364	1.39882	5	0.589768	4.83333	1.23945	4.75	1.59483	7.08333	1.24819	5.4	0.843274	5.5	0.849837	4	1.26491
847	老泪横流	Be in tears (of an elderly person)	negative	3.7551	1.7264	6.44898	1.24267	4.46154	1.84137	7.26923	1.17349	3.32	1.74929	6.48	1.44684	4.85714	2.17246	7.21429	1.28689	4.20833	1.61458	6.41667	1.01795	4	1.25109	7.33333	1.0495	3.07692	1.3542	6.65385	1.29437	4.26923	1.88802	7.26923	1.40165	4.52174	1.80579	6.21739	1.16605	4.65385	1.8098	7.26923	0.91903	2.92857	1.54244	6.92857	1.32806	4.28571	2.26779
848	老马识途	An old hand is a good guide	positive	6.04167	1.38316	5.1875	1.92029	5.22917	1.84782	7.20833	1.14777	6.08333	1.31601	5.5	1.7693	4.375	1.66322	6.70833	1.16018	6	1.47442	4.875	2.04966	6.08333	1.63964	7.70833	0.907896	5.58333	1.28255	5.33333	1.73623	5.34783	1.87347	7.3913	1.19617	6.5	1.35133	5.04167	2.11576	5.12	1.85562	7.04	1.09848	5.66667	1.23091	6.33333	1.07309	4.27273	1.90215
849	老弱残兵	Weak remnants	negative	3.40196	0.957098	5.67647	1.1787	4.34043	1.72295	7.06383	0.964686	3.68	0.978128	5.58	1.12649	3.86957	1.74002	7.08696	0.99604	3.13462	0.863846	5.76923	1.23058	4.79167	1.61458	7.04167	0.954585	3.42	0.991597	5.86	0.880862	4.34783	1.89757	7.21739	0.951388	3.38462	0.932083	5.5	1.39326	4.33333	1.57885	6.91667	0.974308	3.84	0.898146	5.72	0.791623	4.33333	1.96946
850	老少皆知	All the young and old know	neutral	5.60417	0.916505	5	1.41421	5.21277	1.79294	7.48936	1.01879	5.48	0.918332	5.28	1.06145	4.875	1.70198	7.29167	0.907896	5.73913	0.915393	4.69565	1.69048	5.56522	1.85438	7.69565	1.10514	5.6	1.08012	5.12	1.33292	5	1.64184	7.58333	1.05981	5.6087	0.722315	4.86957	1.51671	5.43478	1.94997	7.3913	0.988071	5.35714	1.08182	5.42857	0.755929	5.15385	1.62512
851	老少爷们	Elders and brethren	neutral	5.18182	0.540143	4.36364	1.54153	4.77083	1.38748	7.47917	1.14835	5.20833	0.658005	5	0.932505	4.64	1.55134	7.16	1.28062	5.15	0.366348	3.6	1.78885	4.91304	1.20276	7.82609	0.886883	5	0.447214	4.19048	1.40068	4.54167	0.931533	7.70833	1.08264	5.34783	0.572768	4.52174	1.67521	5	1.71945	7.25	1.18872	4.91667	0.514929	4.66667	0.887625	4.30769	1.18213
852	老实巴交	Honest	neutral	5.35417	1.2289	4.72917	1.4253	6.16327	1.62464	7.44898	1.00127	5.8	0.763763	4.96	1.30639	5.75	1.62186	7.41667	1.01795	4.86957	1.45553	4.47826	1.53355	6.56	1.55671	7.48	1.00499	5.33333	1.30773	4.625	1.66322	6.16	1.72434	7.4	1.1547	5.375	1.1726	4.83333	1.16718	6.16667	1.55106	7.5	0.834058	5.84615	0.800641	5	1.58114	5.53846	1.85362
853	老眼昏花	Dim-sighted from old age	negative	3.55319	1.15737	5.19149	1.31278	3.53061	1.4734	7.42857	1.04083	3.6087	1.07615	5.21739	1.04257	3.68	1.54704	7.32	0.9	3.5	1.25109	5.16667	1.55106	3.375	1.40844	7.54167	1.17877	3.44	1.29357	5.6	1.29099	3.69565	1.32921	7.34783	1.11227	3.68182	0.994574	4.72727	1.20245	3.38462	1.60192	7.5	0.989949	3.53846	1.33012	5.46154	0.877058	3.83333	1.58592
854	老有所学	Learn from old	positive	6.76636	1.11236	5.59813	1.67591	5.66667	1.82939	7.35294	1.03583	6.85455	1.14533	5.8	1.82979	5.22222	2.1183	7.48148	1.08735	6.67308	1.0796	5.38462	1.48395	6.16667	1.30773	7.20833	0.977093	6.90741	1.20171	5.53704	1.74521	5.61538	1.91994	7.15385	1.12044	6.62264	1.00434	5.66038	1.61654	5.72	1.76824	7.56	0.916515	6.96429	1.29048	5.89286	1.98773	5	2.2188
855	唠唠叨叨	Nagging	negative	3.125	1.17826	5.70833	1.07106	4.8913	1.86462	7.3913	1.18281	3.24	1.0116	5.68	1.14455	5.26087	1.45282	6.78261	1.1264	3	1.3484	5.73913	1.00983	4.52174	2.1715	8	0.904534	3.03846	1.14824	5.65385	1.12933	4.72727	2.05129	7.40909	1.33306	3.22727	1.23179	5.77273	1.02036	5.04167	1.70623	7.375	1.05552	3.14286	0.864438	5.42857	1.08941	5.09091	1.57826
856	乐乐呵呵	Laugh a lot	positive	6.64444	1.46405	5.82222	1.62773	6.3125	1.53202	7.70833	0.898186	6.63636	1.64882	5.90909	1.79706	5.83333	1.76109	7.66667	0.761387	6.65217	1.30065	5.73913	1.48377	6.79167	1.10253	7.75	1.03209	6.78261	1.90589	5.91304	1.59297	6.45833	1.84106	7.75	1.07339	6.5	0.801784	5.72727	1.69542	6.16667	1.16718	7.66667	0.701964	6.91667	2.10878	5.83333	2.12489	5.83333	2.12489
857	乐天知命	Rest content	positive	6.02128	1.07318	5.10638	1.507	5.4375	1.999	7.02083	1.2289	5.82609	0.886883	5.13043	1.21746	4.875	1.96297	6.79167	1.14129	6.20833	1.21509	5.08333	1.76725	6	1.91107	7.25	1.2938	5.78261	1.16605	5.26087	1.38883	5.65217	2.01379	7	1.4771	6.25	0.944089	4.95833	1.62799	5.24	2.00582	7.04	0.978093	5.81818	1.07872	5.09091	1.6404	4.63636	2.29228
858	乐以忘忧	Being so happy as to forget worries	positive	6.10417	1.7165	4.95833	1.82137	5.57692	1.70749	6.63462	1.34352	6.04167	1.68056	5.25	1.75078	4.7037	1.65981	6.55556	1.18754	6.16667	1.78561	4.66667	1.88049	6.52	1.19443	6.72	1.51438	6.12	1.9	5.6	1.60728	5.30769	1.84974	6.46154	1.44861	6.08696	1.53484	4.26087	1.81452	5.84615	1.54123	6.80769	1.23351	6.30769	1.88788	5.84615	1.95133	4.5	1.82925
859	了若指掌	Like the palm of one's own hand(well know)	positive	6.34694	1.40758	5.22449	1.91774	6.44	1.94999	7.52	1.1292	6.46154	1.55514	5.53846	2.04413	5.84	1.67531	7.4	0.912871	6.21739	1.24157	4.86957	1.74002	7.04	2.05102	7.64	1.31909	5.88	1.58955	5.56	1.75784	6.72	1.56844	7.4	1.29099	6.83333	1.00722	4.875	2.04966	6.16	2.26716	7.64	0.95219	6.14286	1.79131	6.21429	1.42389	6.23077	1.5359
860	泪痕斑斑	Tear stain	negative	3.21905	1.12644	6.19048	1.14434	4.79167	1.38316	6.85417	1.14835	2.83019	1.17237	6.26415	1.16274	5.125	1.56906	6.875	0.797414	3.61538	0.932083	6.11538	1.13161	4.45833	1.10253	6.83333	1.43456	2.96296	1.24329	6.38889	1.2196	5.04167	1.39811	6.79167	0.931533	3.4902	0.924609	5.98039	1.02937	4.54167	1.35066	6.91667	1.34864	2.37037	1.14852	6.62963	1.11452	5.58333	1.24011
861	累死累活	Exhausted	negative	3.30952	1.03863	5.93333	1.27299	3.95745	1.66756	7.25532	0.89608	3.25926	1.0848	5.83333	1.37017	4.30435	1.66337	6.86957	0.694416	3.36275	0.995381	6.03922	1.16552	3.625	1.63687	7.625	0.923721	3.04808	0.991432	6.11538	0.877917	3.90909	1.37699	7.22727	0.922307	3.56604	1.02862	5.75472	1.55546	4	1.91485	7.28	0.890693	3	1.1547	6.10714	0.956045	4.45455	1.69491
862	冷暖自知	Know by oneself whether it is cold or warm	neutral	5.19149	1.07619	4.97872	1.15136	5.79167	1.91254	7.39583	1.04657	5.65217	0.572768	4.95652	1.18622	5.70833	1.70623	7.125	1.03472	4.75	1.25974	5	1.14208	5.875	2.13282	7.66667	1.00722	5.12	0.781025	4.84	1.17898	5.91304	1.70329	7.26087	1.09617	5.27273	1.35161	5.13636	1.12527	5.68	2.11581	7.52	1.00499	5.46154	0.518875	4.61538	1.38675	6.33333	1.49747
863	冷水浇头	A bitter disappointment	negative	3.39362	1.48154	6.07447	1.17944	4.91837	2.19694	7.14286	1.25831	3.2	1.25831	6.32	1.1804	4.80769	2.0595	7.07692	0.97665	3.61364	1.70386	5.79545	1.14079	5.04348	2.38324	7.21739	1.53613	3.45652	1.75106	6.15217	0.993556	4.625	2.16318	7.20833	1.14129	3.33333	1.20386	6	1.35133	5.2	2.23607	7.08	1.38203	3	1.35401	6.46154	1.05003	4.53846	2.10616
864	冷言冷语	Mocking words	negative	2.96296	0.956297	5.76852	1.51384	4.4	1.73729	7.33333	1.066	3.01852	0.980773	5.81481	1.28964	5	1.90693	6.86957	1.01374	2.90741	0.937047	5.72222	1.72021	3.77273	1.30683	7.81818	0.906924	2.81818	0.92478	5.96364	1.42678	4.18182	1.86793	7.5	1.18523	3.11321	0.973897	5.56604	1.58732	4.6087	1.61637	7.17391	0.936734	2.92857	0.939999	5.85714	1.35303	4.72727	2.149
865	冷眼相待	Silent	negative	3.11321	1.08075	6.13208	1.13872	4.95833	1.95653	7.3125	1.1328	3.37037	1.20214	6.03704	1.08093	6	1.41421	7	1.25109	2.84615	0.871884	6.23077	1.19829	3.91667	1.88626	7.625	0.923721	3.03774	1.12596	6	1.1266	4.875	2.02833	7.625	0.969648	3.18868	1.0388	6.26415	1.14608	5.04167	1.92194	7	1.21584	3.25926	1.31829	5.92593	0.997147	6.08333	1.78164
866	冷眼相看	Look coldly upon	negative	3.23077	1.08145	5.74038	1.38645	5.3125	1.81197	7.22917	0.972813	3.62264	1.16399	5.30189	1.51385	5.43478	1.59049	7	0.797724	2.82353	0.817457	6.19608	1.0774	5.2	2.02073	7.44	1.08321	3.23077	1.26205	5.65385	1.39866	4.91304	1.78155	7.21739	1.04257	3.23077	0.877058	5.82692	1.38226	5.68	1.79629	7.24	0.925563	3.72	1.33915	5.28	1.42945	5.27273	1.84883
867	愣头愣脑	Reckless	negative	3.82979	1.52257	5.53191	1.45738	4.71739	1.6147	7.17391	0.995643	3.52174	1.27456	5.69565	1.42812	4.6087	1.55911	6.69565	0.76484	4.125	1.70198	5.375	1.49819	4.82609	1.69631	7.65217	0.982052	3.63636	1.39882	5.36364	1.36436	4.68182	1.49241	7.13636	1.03719	4	1.63299	5.68	1.54704	4.75	1.75078	7.20833	0.977093	3.3	1.33749	5.5	1.71594	4.54545	1.75292
868	离愁别绪	Parting grief	negative	3.52273	1.10997	5.90909	0.984016	4.54167	1.86751	7.125	1.2484	3.34783	1.22877	5.82609	1.19286	5.25	1.67462	6.5	1.21584	3.71429	0.956183	6	0.707107	3.83333	1.8098	7.75	0.944089	3.5	1.31789	6.1	0.718185	4.58333	1.76725	6.91667	1.5299	3.54167	0.931533	5.75	1.15156	4.5	2	7.33333	0.868115	2.90909	1.22103	6.18182	0.873863	5.07692	1.97744
869	离题万里	Completely off the point	negative	3.21635	1.07207	5.65385	1.29051	4.76596	1.79629	6.48936	1.69234	2.98113	1.02827	5.60377	1.3059	5.24	1.87705	6.2	1.68325	3.46078	1.07165	5.70588	1.28521	4.22727	1.57153	6.81818	1.68003	3.45192	1.26514	5.5	1.1964	4.45833	1.69344	6.25	1.87083	2.98077	0.779401	5.80769	1.37254	5.08696	1.88084	6.73913	1.48377	3.07407	1.14105	5.62963	1.21365	4.76923	2.0064
870	里里外外	Inside and outside	neutral	5.04082	0.428817	4.68367	1.11778	5	1.45686	7	1.55183	5.1087	0.378785	4.93478	0.573573	4.56	1.66032	7.16	1.21381	4.98077	0.464014	4.46154	1.40673	5.44	1.08321	6.84	1.8412	5	0.353553	4.69388	1.14025	4.88	1.45258	6.84	1.72434	5.08163	0.49315	4.67347	1.10657	5.12	1.48099	7.16	1.37477	5.04545	0.213201	4.90909	0.610159	4.46154	1.89804
871	理当如此	That's the right thing to do.	neutral	5.46078	0.991764	5.15686	1.28005	5.45833	1.50118	7.04167	1.09074	5.64	0.984782	5.12	1.27199	5.17391	1.37021	6.78261	0.998022	5.28846	0.976921	5.19231	1.29915	5.72	1.59478	7.28	1.13725	5.26531	0.884485	5.32653	1.19701	5.73913	1.48377	7.08696	1.16436	5.64151	1.05783	5	1.3445	5.2	1.5	7	1.04083	5.25	0.84699	5.375	1.27901	5.36364	1.36182
872	理解万岁	Understanding is everything	positive	6.59574	1.07662	5.42553	1.85032	5.89362	1.94751	7.55319	1.07962	6.66667	1.16718	5.58333	2.04124	5.45833	1.74404	7.33333	1.09014	6.52174	0.994053	5.26087	1.65742	6.34783	2.0804	7.78261	1.04257	6.56522	1.23679	5.56522	1.80469	5.70833	2.15647	7.41667	1.31601	6.625	0.923721	5.29167	1.92194	6.08696	1.72977	7.69565	0.76484	6.58333	1.37895	5.58333	2.02073	5.16667	2.12489
873	力不胜任	Incompetent	negative	3.82222	0.936359	5.48889	1.25449	4.55102	1.72072	6.69388	1.60992	4	0.83666	5.42857	1.20712	4.84	1.65025	6.6	1.47196	3.66667	1.00722	5.54167	1.31807	4.25	1.77544	6.79167	1.76879	3.79167	0.977093	5.375	1.40844	4.52	1.50333	6.32	2.03552	3.85714	0.910259	5.61905	1.07127	4.58333	1.95419	7.08333	0.880547	4	0.738549	5.25	1.21543	4.76923	1.87767
874	历尽艰辛	Go through hard work	neutral	5.22727	1.62629	6.02273	1.67733	4.9375	1.98297	7.22917	0.92804	5.19048	1.63153	5.61905	1.39557	4.625	2.01759	6.91667	0.717282	5.26087	1.65742	6.3913	1.85225	5.25	1.9393	7.54167	1.02062	5.18182	1.70814	5.54545	1.89554	5.08696	2.21386	7.13043	0.967863	5.27273	1.57908	6.5	1.30018	4.8	1.77951	7.32	0.9	4.81818	1.88776	5.45455	1.4397	5.09091	2.46798
875	历历可数	Countable	neutral	5.12019	0.863205	4.77885	1.25378	5.36735	1.67946	6.89796	1.35777	5.03846	0.928028	5.01923	0.896406	5.2	1.82574	6.88	1.50886	5.20192	0.793723	4.53846	1.50113	5.54167	1.53167	6.91667	1.21285	5.0098	0.851412	4.72549	1.15028	5.92	1.25565	6.84	1.57268	5.22642	0.869162	4.83019	1.35499	4.79167	1.8877	6.95833	1.12208	4.84615	0.967153	5.15385	0.7317	5.92308	1.38212
876	历史清白	Innocent history	positive	6.01415	1.16794	4.83962	1.65694	4.66667	1.97143	7.39583	1.08647	6.50909	1.15266	5.30909	1.73069	4.4	2.10159	7.36	1.03602	5.48039	0.932528	4.33333	1.42361	4.95652	1.82105	7.43478	1.16096	5.93519	1.1329	4.7963	1.67534	4.41667	2.01983	7.375	1.13492	6.09615	1.20879	4.88462	1.65273	4.91667	1.93181	7.41667	1.05981	6.21429	1.1661	5.21429	1.85307	4	2.08167
877	历史学界	Historians	neutral	5.13265	0.468332	4.5102	1.31796	4.34	1.27151	6.56	1.78611	5.14583	0.58308	4.8125	1.04487	4.48	1.15902	6.6	1.65831	5.12	0.328261	4.22	1.4886	4.2	1.38444	6.52	1.93907	5.06122	0.242226	4.44898	1.56872	4.66667	0.916831	6.08333	1.86307	5.20408	0.611678	4.57143	1.02062	4.03846	1.48272	7	1.62481	5	0	4.82609	1.19286	5.08333	0.288675
878	立体几何	Stereoscopic geometry	neutral	5.09302	0.426165	4.2093	1.69815	4.89796	2.10401	7.65306	1.36246	5	0	5	0	4.2	2.06155	6.96	1.45717	5.18182	0.58849	3.45455	2.13201	5.625	1.92946	8.375	0.76967	5.17391	0.576208	4.21739	1.90589	4.91667	1.76725	7.375	1.58286	5	0	4.2	1.47256	4.88	2.42074	7.92	1.07703	5	0	5	0	4.16667	2.12489
879	利害攸关	Have a stake in	neutral	4.7234	1.15537	5.85106	1.48878	4.25532	1.59439	6.70213	1.50239	4.69565	0.97397	5.30435	0.822125	4.34783	1.69515	6.08696	1.59297	4.75	1.32698	6.375	1.78916	4.16667	1.52277	7.29167	1.16018	4.65217	1.26522	5.82609	1.52709	3.86957	1.54638	6.34783	1.89757	4.79167	1.06237	5.875	1.48361	4.625	1.58286	7.04167	0.907896	4.45455	0.934199	5.27273	0.786245	4	1.73205
880	利利索索	Quick and efficient	positive	6.44762	0.950516	5.24762	1.66283	6.48936	1.31665	7.44681	1.07962	6.62963	1.03334	5.42593	1.78676	6.34783	1.33514	7.30435	0.926125	6.2549	0.820808	5.05882	1.51541	6.625	1.31256	7.58333	1.21285	6.4717	1.01154	5.37736	1.65514	6.86957	1.09977	7.56522	1.07982	6.42308	0.893246	5.11538	1.67629	6.125	1.42379	7.33333	1.09014	6.60714	1.13331	5.64286	1.87012	6.81818	1.47093
881	连蹦带跳	Hop and skip	positive	6.34783	1.32023	6.15217	1.39789	6.39583	1.41029	7.60417	1.04657	6.30435	1.22232	6.21739	1.50625	6.04	1.39881	7.28	1.02144	6.3913	1.43777	6.08696	1.31125	6.78261	1.34693	7.95652	0.975997	6.58333	1.17646	6.125	1.39292	6.72	1.42945	7.68	0.945163	6.09091	1.4445	6.18182	1.43548	6.04348	1.3307	7.52174	1.16266	6.53846	1.26592	6.23077	1.7867	6.23077	1.36344
882	连连称是	Again and again agree	neutral	5.43478	1.24101	5.63043	1.28856	5.58333	1.68641	6.77083	1.49096	5.91304	0.99604	5.69565	1.29456	5.95652	1.22394	6.43478	1.27301	4.95652	1.29609	5.56522	1.30823	5.24	1.98494	7.08	1.63095	5.47619	1.07792	5.33333	1.19722	5.69565	1.69048	7.13043	1.28997	5.4	1.38444	5.88	1.33292	5.48	1.71075	6.44	1.60935	5.9	0.875595	5.5	1.58114	6.18182	1.16775
883	连年不断	Years after years	neutral	4.76596	1.27199	5.40426	1.61056	4.10417	1.80118	6.9375	1.19228	4.91304	0.514609	5.34783	0.572768	3.73913	1.76371	6.56522	1.03687	4.625	1.71471	5.45833	2.2063	4.44	1.80462	7.28	1.24231	4.6087	1.2699	5.30435	1.7693	4.125	1.75233	7.04167	1.19707	4.91667	1.28255	5.5	1.47442	4.08333	1.88626	6.83333	1.20386	5	0.632456	5.54545	0.687552	3.66667	1.87487
884	怜香惜玉	Have a compassion for womanhood	neutral	5.88542	1.13569	5.16667	1.52054	5.91667	1.4267	7.22917	1.20706	5.65385	1.23101	5.42308	1.36156	6.25	1.03209	6.95833	1.16018	6.15909	0.968386	4.86364	1.67034	5.58333	1.69184	7.5	1.21584	5.86	1.3032	5.32	1.70098	5.95652	1.14726	7.21739	1.27766	5.91304	0.949308	5	1.31426	5.88	1.66633	7.24	1.16476	5.85714	1.40642	5.85714	1.61041	6.58333	1.08362
885	良辰吉日	Auspicious day	positive	7.05208	1.16801	6.29167	1.80965	4.61224	2.27135	7.42857	1.11803	7.32	1.1804	6.24	2.16564	4.19231	2.3836	7.19231	1.13205	6.76087	1.10648	6.34783	1.36877	5.08696	2.08704	7.69565	1.06322	7.14583	1.26387	6.25	1.59483	4.8	2.41523	7.56	1.22746	6.95833	1.08264	6.33333	2.03591	4.41667	2.1451	7.29167	0.999094	7.38462	1.3253	6.61538	1.85016	4.78571	2.60705
886	良药苦口	Good medicine tastes bitter	neutral	5.44681	1.24775	5.51064	1.53045	4.50943	1.85662	7.50943	0.953186	5.65217	1.40158	5.3913	1.61637	4.10714	1.83261	7.35714	0.95119	5.25	1.07339	5.625	1.46888	4.96	1.81384	7.68	0.945163	5.31818	1.12911	5.13636	1.42413	4.57692	1.90101	7.42308	1.02657	5.56	1.35647	5.84	1.57268	4.44444	1.84669	7.59259	0.888355	5.5	1.2693	5.2	1.68655	4.28571	2.12779
887	粮食局长	Food director	neutral	5	0	4.16279	1.57254	4.08511	1.52984	6.3617	1.93846	5	0	4.77273	0.81251	4	1.41421	6.58333	1.50121	5	0	3.52381	1.91361	4.17391	1.6693	6.13043	2.32192	5	0	3.95238	1.71686	4.04348	1.58051	6.3913	1.9007	5	0	4.36364	1.43246	4.125	1.51263	6.33333	2.01444	5	0	4.54545	1.03573	4.08333	1.37895
888	两次三番	Again and again	negative	3.91837	1.15175	5.38776	1.23855	5.36735	1.62908	6.77551	1.12297	4.16	0.943398	5.32	0.945163	5.20833	1.53167	6.625	0.923721	3.66667	1.30773	5.45833	1.50302	5.52	1.73494	6.92	1.28841	3.64	0.994987	5.4	1.19024	5.47826	1.95098	7.04348	1.06508	4.20833	1.25036	5.375	1.31256	5.26923	1.31325	6.53846	1.1395	3.76923	0.926809	5.46154	1.26592	4.90909	2.0226
889	两肋插刀	Remain faithful to friends	positive	6.04854	1.51061	6.39806	1.30864	5.96	1.90552	7.5	1.05463	5.7451	1.58547	6.33333	1.29099	5.5	1.92354	7.30769	1.01071	6.34615	1.38457	6.46154	1.33522	6.45833	1.7932	7.70833	1.08264	6.07843	1.35415	6.37255	1.26429	6.20833	1.93321	7.625	1.13492	6.01923	1.66263	6.42308	1.36261	5.73077	1.88802	7.38462	0.982931	5.92	1.11505	6.08	1.28841	5.30769	2.13638
890	两面三刀	Act one way to sb.'s face and another behind his back	negative	2.54902	1.00126	6.41176	1.30765	4.38298	1.70106	7.04255	1.10252	2.42	0.970798	6.32	1.63433	4.875	1.59653	6.70833	0.999094	2.67308	1.02366	6.5	0.896617	3.86957	1.68696	7.3913	1.11759	2.54	1.03431	6.5	1.11117	4.17391	1.58551	7	1.24316	2.55769	0.978463	6.32692	1.47822	4.58333	1.81579	7.08333	0.974308	2.45833	1.06237	6.54167	1.35066	4.72727	1.73729
891	亮亮堂堂	Bright	positive	6.75	1.29648	5.875	1.82914	5.83333	1.47797	6.95833	1.21967	6.56	1.38684	5.6	2.17945	5.45833	1.41357	6.91667	1.10007	6.95652	1.18622	6.17391	1.33662	6.20833	1.47381	7	1.35133	6.96	1.24097	5.92	1.93477	6.26087	1.32175	7.08696	1.04067	6.52174	1.344	5.82609	1.74908	5.44	1.52971	6.84	1.37477	6.64286	1.27745	5.71429	2.46291	5.91667	1.31137
892	量才录用	Hire personnel on the basis of their abilities	positive	6.10417	1.17128	5.1875	1.55271	5.10417	1.98118	6.8125	1.3785	6.48	1.26227	5.6	1.68325	4.875	2.15311	6.875	1.2619	5.69565	0.926125	4.73913	1.28691	5.33333	1.8098	6.75	1.51083	5.95833	1.30148	5.29167	1.45898	4.54545	2.10955	6.86364	1.24577	6.25	1.03209	5.08333	1.66594	5.57692	1.77027	6.76923	1.50486	6.30769	1.37747	5.53846	1.71345	4.09091	2.42712
893	量力而为	Act according to one's capability	neutral	5.46809	1.01833	4.82979	1.46435	6.24	1.81333	7.68	0.767716	5.68	1.02956	5.08	1.35154	6.24	1.71464	7.48	0.714143	5.22727	0.972567	4.54545	1.56532	6.24	1.94251	7.88	0.781025	5.54167	1.06237	5.08333	1.31601	6.125	1.77697	7.625	0.875388	5.3913	0.988071	4.56522	1.59049	6.34615	1.87494	7.73077	0.666795	5.69231	1.03155	5.61538	1.04391	6.16667	1.6967
894	量子物理	Quantum physics	neutral	4.97619	0.64347	4.64286	1.55895	3.97917	1.87355	6.0625	2.02544	5	0	4.94737	0.229416	4.125	1.80127	5.41667	1.88626	4.95652	0.877924	4.3913	2.08325	3.83333	1.9708	6.70833	1.98865	4.8	0.523148	4.6	1.42902	4.34783	1.64064	5.3913	2.18963	5.13636	0.710161	4.68182	1.70116	3.64	2.03879	6.68	1.67631	5	0	5	0	4.45455	1.80907
895	踉踉跄跄	Stumble along	negative	3.35417	0.837666	5.52083	1.30449	5.04	1.4563	7.06	1.23569	3.24	0.969536	5.56	1.41657	5.34615	1.46812	6.76923	1.36551	3.47826	0.665348	5.47826	1.20112	4.70833	1.39811	7.375	1.0135	3.34615	0.689481	5.46154	1.39229	4.96	1.59374	7.24	1.23423	3.36364	1.00216	5.59091	1.22121	5.12	1.33292	6.88	1.23558	3.28571	0.726273	5.64286	1.27745	5.30769	1.84321
896	潦潦草草	Scribble	negative	3.21277	1.04124	5.04255	1.62798	5.72549	1.61342	7.17647	1.27602	3.13043	1.05763	5.04348	1.49174	5.96154	1.82166	7.23077	0.862911	3.29167	1.0417	5.04167	1.78104	5.48	1.35769	7.12	1.61555	3.45833	1.02062	5.16667	1.55106	5.88	1.56312	7.28	0.979796	2.95652	1.02151	4.91304	1.72977	5.57692	1.67745	7.07692	1.52113	3.5	1.08711	5.25	1.3568	6.23077	1.83275
897	料事如神	Foretell like a prophet	positive	6.8932	1.14543	6.50485	1.44761	5.34	2.29115	7.12	1.59898	6.82692	1.24808	6.30769	1.76611	4.88	2.2971	6.88	1.78699	6.96078	1.03848	6.70588	1.00587	5.8	2.23607	7.36	1.38082	6.92308	1.15209	6.78846	1.14338	5.4	2.38048	6.64	1.97653	6.86275	1.14925	6.21569	1.6651	5.28	2.24574	7.6	0.912871	6.76	1.26754	6.8	1.25831	4.84615	2.57702
898	烈焰腾腾	Blaze	neutral	4.82979	1.61944	6.51064	1.4577	3.9375	2.04634	6.54167	1.42856	5.04348	1.91829	6	1.67874	3.16667	1.85722	6.375	1.0135	4.625	1.27901	7	1.02151	4.70833	1.96666	6.70833	1.75646	4.30435	1.60779	6.47826	1.67521	3.82609	2.08135	6.73913	1.48377	5.33333	1.49395	6.54167	1.25036	4.04	2.05102	6.36	1.38082	4.54545	2.06706	6.09091	2.11918	2.90909	1.7581
899	临机应变	Act as circumstances dictate	positive	6.22857	1.05846	5.84762	1.31399	6.22	1.38932	7.22	1.32926	5.86792	1.00073	5.73585	1.3323	5.88	1.39403	6.72	0.979796	6.59615	0.995275	5.96154	1.29799	6.56	1.32539	7.72	1.45831	6.22222	1.14376	5.74074	1.2617	6.25	1.48177	7.25	1.18872	6.23529	0.971354	5.96078	1.37056	6.19231	1.32723	7.19231	1.47022	5.78571	1.06657	5.53571	1.45251	5.66667	1.72328
900	临阵磨枪	Sharpen one's spear only before going into battle	neutral	4.69388	1.60992	5.77551	1.34265	5.26	1.80487	7.3	1.19949	4.52	1.55778	5.64	0.95219	5.4	1.65831	6.88	1.33292	4.875	1.67624	5.91667	1.66594	5.12	1.96469	7.72	0.890693	4.84	1.34412	5.8	1.32288	5.4	1.77951	7.2	1.38444	4.54167	1.86452	5.75	1.39096	5.12	1.85562	7.4	1	4.76923	1.23517	5.76923	0.725011	5.76923	1.73944
901	临阵脱逃	Escape; fly in the face of danger	negative	2.23913	1.05798	6.67391	1.76452	4.98	2.05526	7.1	1.21638	2.04545	0.843873	6.54545	1.79224	5.14815	1.79108	6.77778	1.36814	2.41667	1.21285	6.79167	1.76879	4.78261	2.35404	7.47826	0.897956	2.125	1.15392	6.625	1.92946	4.58333	1.74248	7.08333	0.974308	2.36364	0.953463	6.72727	1.60896	5.34615	2.27934	7.11538	1.42343	1.75	0.866025	6.41667	1.97523	4.76923	1.64083
902	淋淋漓漓	Dripping	neutral	4.71111	1.35885	5.31111	1.25811	4.83333	1.56196	6.35417	1.60438	4.13043	1.45553	5.34783	1.30065	4.95833	1.45898	6.5	1.14208	5.31818	0.945484	5.27273	1.24142	4.70833	1.68056	6.20833	1.97768	4.6	1.23117	5.45	0.944513	4.82609	1.55657	6.6087	1.46905	4.8	1.47196	5.2	1.47196	4.84	1.59896	6.12	1.71561	3.9	1.1005	5.6	1.07497	5	1.53741
903	伶牙俐齿	Have the gift of the gab	neutral	4.44681	1.99792	6.25532	1.34274	5.46	1.97133	7.44	0.907115	3.56522	1.59049	6.21739	1.53613	4.92	1.95619	7.08	0.702377	5.29167	2.01039	6.29167	1.16018	6	1.87083	7.8	0.957427	4.69565	1.94082	6.17391	1.37021	5.33333	2.21981	7.33333	0.916831	4.20833	2.06375	6.33333	1.34056	5.57692	1.74753	7.53846	0.904689	3.63636	1.43337	5.90909	1.57826	4.41667	2.19331
904	灵丹妙药	A ready-made panacea	positive	6.77083	1.20706	5.72917	1.7714	4.0625	1.79131	7.04167	1.39845	6.53846	1.44861	5.53846	2.0829	3.43478	1.77933	7.13043	0.814881	7.04545	0.785419	5.95455	1.32655	4.64	1.62993	6.96	1.79072	6.8	1.32288	5.88	1.96469	3.95652	1.58051	7.17391	0.886883	6.73913	1.09617	5.56522	1.56165	4.16	1.99332	6.92	1.75404	6.71429	1.5898	5.64286	2.40535	3.63636	1.91169
905	玲珑剔透	Exquisitely carved	positive	6.75238	1.13325	5.90476	1.535	4.95833	1.47256	7.125	0.959277	6.50943	1.17051	6.07547	1.60347	4.16	1.21381	6.88	0.781025	7	1.04787	5.73077	1.45677	5.82609	1.23038	7.3913	1.07615	7.07692	1.06359	6.32692	1.368	4.65217	1.30065	7.26087	1.00983	6.43396	1.1182	5.49057	1.58869	5.24	1.5885	7	0.912871	6.88889	1.1547	6.96296	1.19233	4.08333	1.44338
906	绫罗绸缎	Silk and satin	neutral	5.91489	1.24813	5.3617	1.53829	5.31373	1.64305	7.19608	0.980196	5.56522	0.992063	4.91304	1.50493	4.65385	1.62339	7.07692	1.12865	6.25	1.39096	5.79167	1.47381	6	1.38444	7.32	0.802081	6.22727	1.19251	5.27273	1.7507	5.46154	1.67883	7.19231	1.16685	5.64	1.25433	5.44	1.35647	5.16	1.62481	7.2	0.763763	5.7	0.948683	4.6	1.7127	4.85714	1.70326
907	零零落落	Fragmented	neutral	4.1087	0.948174	4.95652	1.33261	4.86	1.457	6.86	1.30946	4.13043	1.14035	4.6087	1.49967	4.6	1.29099	6.4	1.47196	4.08696	0.733178	5.30435	1.06322	5.12	1.58955	7.32	0.945163	4.13636	0.774317	5	1.1547	4.84	1.49108	6.68	1.46401	4.08333	1.10007	4.91667	1.50121	4.88	1.45258	7.04	1.13578	4.18182	0.98165	4.63636	1.50151	4.38462	1.50214
908	零零散散	Scattered	neutral	4.36957	0.826201	4.78261	1.2277	5.14	1.39985	7.2	1.26168	4.54545	0.738549	4.95455	0.652998	4.72	1.45831	7	0.866025	4.20833	0.883627	4.625	1.58286	5.56	1.22746	7.4	1.55456	4.5	0.722315	4.91667	1.10007	4.875	1.03472	7.29167	1.19707	4.22727	0.922307	4.63636	1.36436	5.38462	1.65111	7.11538	1.33647	4.66667	0.778499	5	0.426401	4.75	1.3568
909	零零碎碎	Fragmentary	neutral	4.2766	0.971376	5.04255	1.31806	5.28571	1.25831	7.02041	1.1635	4.26087	0.810016	5.21739	0.735868	4.8	1.1547	6.84	1.02794	4.29167	1.12208	4.875	1.70198	5.79167	1.17877	7.20833	1.28466	4.16	0.898146	4.84	1.21381	5.25	1.2938	7.08333	1.34864	4.40909	1.05375	5.27273	1.42032	5.32	1.249	6.96	0.978093	4.07692	0.954074	5.15385	0.898717	4.83333	1.19342
910	另请高明	Find someone better	neutral	4.04444	1.26051	5.8	1.15994	5.29167	1.90138	7.16667	0.952786	4.29167	1.26763	5.875	1.42379	5.66667	1.92617	7.04167	0.954585	3.7619	1.22085	5.71429	0.783764	4.91667	1.83958	7.29167	0.954585	3.92	1.35154	5.72	1.27541	5.26087	1.95907	7.04348	1.02151	4.2	1.15166	5.9	1.02084	5.32	1.8868	7.28	0.890693	4.15385	1.40512	5.92308	1.65638	5.66667	2.10339
911	令人寒心	Chilling	negative	2.59091	0.947903	6.25	1.29624	3.85417	1.51573	7.0625	1.0191	2.56522	0.992063	6.08696	1.50493	4.2	1.63299	6.96	0.888819	2.61905	0.920662	6.42857	1.02817	3.47826	1.30974	7.17391	1.15413	2.33333	1.19722	6.71429	0.845154	4.04167	1.45898	7.29167	1.0417	2.82609	0.576208	5.82609	1.49703	3.66667	1.57885	6.83333	0.963087	2.16667	1.19342	6.58333	0.792961	4.23077	1.5359
912	溜须拍马	Fawn on	negative	2.80851	1.55533	5.95745	1.99954	5.07692	1.72463	6.78846	1.79691	2.6087	1.67167	6	2.19504	4.7037	1.63648	7.07407	1.14105	3	1.44463	5.91667	1.83958	5.48	1.75879	6.48	2.29347	2.6087	1.4058	6.21739	1.88189	4.88	1.56312	7.04	1.59374	3	1.69398	5.70833	2.11576	5.25926	1.87273	6.55556	1.96769	2.36364	1.36182	6.54545	1.69491	3.92308	1.18754
913	流传已久	For a long time	neutral	5.51064	1.10084	5.34043	1.47849	4.02041	1.65189	7.08163	1.20479	5.3913	1.03305	5.52174	1.12288	4.08	1.75404	6.84	1.43411	5.625	1.1726	5.16667	1.76109	3.95833	1.57367	7.33333	0.868115	5.28	0.890693	5.32	1.1804	4.08333	1.5299	6.91667	1.47196	5.77273	1.26986	5.36364	1.7874	3.96	1.79072	7.24	0.879394	5.23077	1.01274	5.46154	1.05003	4.07692	1.75412
914	流芳千古	Immortal fame	positive	7.29787	1.26688	6.65957	1.83299	4.40816	2.26309	7.22449	1.27908	7.56522	1.19947	7	1.93061	3.875	2.17321	7.16667	1.00722	7.04167	1.30148	6.33333	1.711	4.92	2.27156	7.28	1.51438	7.28	1.51438	6.76	1.85472	4.83333	2.35292	7.08333	1.21285	7.31818	0.945484	6.54545	1.84461	4	2.14087	7.36	1.35031	7.61538	1.50214	7.69231	1.54837	4	2.2563
915	流浪江湖	Move about the country without definite employment	negative	3.97917	1.31262	5.20833	1.57045	5	2.03235	7.08511	1.44207	3.875	1.2959	5.375	1.27901	5	1.95402	6.73913	1.48377	4.08333	1.34864	5.04167	1.82921	5	2.14679	7.41667	1.34864	4.13043	1.28997	5.21739	1.85758	4.96	1.94679	6.84	1.8412	3.84	1.34412	5.2	1.29099	5.04545	2.17074	7.36364	0.726731	4	1.18322	5.45455	1.36848	5.46154	2.02548
916	流连忘返	Indulge in pleasures without stop	positive	6.21739	1.05226	5.95652	1.33261	4.95918	1.71949	7.14286	1.30703	6.27273	0.882735	6.04545	1.4953	5.48	1.66132	6.88	1.39403	6.16667	1.20386	5.875	1.191	4.41667	1.63964	7.41667	1.17646	6.24	1.33167	6.16	1.06771	5.16	1.81842	7.12	1.61555	6.19048	0.601585	5.71429	1.58565	4.75	1.62186	7.16667	0.916831	6.30769	1.1094	6.38462	1.19293	5.69231	1.60128
917	流落江湖	Live a vagabond life	negative	3.65217	1.30328	5.65217	1.25109	4.10638	1.96971	6.87234	1.59642	3.21739	1.0853	5.69565	1.36298	3.73913	1.88818	6.47826	2.06419	4.08696	1.37883	5.6087	1.15755	4.45833	2.02117	7.25	0.84699	3.25	1.2938	5.45833	1.35066	4.24	2.02649	6.52	2.0025	4.09091	1.1916	5.86364	1.12527	3.95455	1.939	7.27273	0.827032	2.76923	1.16575	5.69231	1.6525	3.92308	2.21591
918	流水落花	Like fallen flowers carried away by the flowing water	neutral	4.65217	1.26872	5.56522	1.31068	4.54167	1.79785	6.9375	1.47902	4.82609	1.40299	5.21739	1.59421	4.08	1.49778	6.44	1.60935	4.47826	1.12288	5.91304	0.848155	5.04348	1.98811	7.47826	1.12288	4.45455	1.01076	5.63636	1.21677	4.5	1.88818	7	1.81779	4.83333	1.46456	5.5	1.41421	4.58333	1.74248	6.875	1.07592	4.8	1.13529	5.4	1.42984	4.30769	1.79743
919	六根清净	The six roots of sensations are pure and clean -- a buddhist term	neutral	5.79167	1.21967	4.66667	1.74226	5.05882	1.89116	6.58824	1.72252	5.54167	0.779028	5.375	0.824226	4.66667	1.79743	6.14815	1.81243	6.04167	1.51741	3.95833	2.11576	5.5	1.93368	7.08333	1.50121	5.8	1.25831	4.8	1.63299	5.5	1.79444	6.53846	1.90223	5.78261	1.20441	4.52174	1.87979	4.6	1.91485	6.64	1.55134	5.53846	0.877058	5.46154	0.877058	5.14286	1.79131
920	六神不安	Worried about something	negative	3.21739	0.98687	5.69565	1.45861	4.45833	1.94563	7.04167	0.988408	3.21739	1.04257	5.04348	1.63702	4.6087	1.72519	6.95652	0.975997	3.21739	0.951388	6.34783	0.884652	4.32	2.15484	7.12	1.01325	3.26087	1.17618	6.04348	1.29609	4.69565	2.0766	7.08696	1.23998	3.17391	0.777652	5.34783	1.5553	4.24	1.83212	7	0.707107	3.09091	1.13618	5.54545	1.29334	4.54545	1.80907
921	龙马精神	The vigor of a dragon or horse	positive	6.70213	1.28393	6.34043	1.748	5.36	1.89263	6.84	1.43371	6.65217	1.36877	6.08696	2.06514	5	1.85472	6.88462	1.3062	6.75	1.22474	6.58333	1.38051	5.75	1.89393	6.79167	1.58743	6.56522	1.5023	6.47826	1.72862	5.16667	1.78561	6.875	1.2959	6.83333	1.0495	6.20833	1.7932	5.53846	2.00461	6.80769	1.57529	6.18182	1.66242	6.36364	2.2033	4.84615	2.03495
922	龙腾虎跃	A scene of bustling activity	positive	6.98958	1.09394	6.34375	1.7109	4.72917	1.78337	6.97917	1.36038	7.16	1.17898	6.72	1.54164	4.17391	1.87452	7.04348	1.18622	6.80435	0.985568	5.93478	1.82349	5.24	1.56205	6.92	1.52534	6.89583	1.21565	6.0625	1.86683	4.95652	2.03332	7.04348	1.22394	7.08333	0.974308	6.625	1.52693	4.52	1.5308	6.92	1.49778	7.07692	1.25576	6.76923	1.30089	4.45455	2.38175
923	龙争虎斗	Fierce struggle	neutral	4.6087	1.87946	6.54348	1.3777	4.34615	1.76995	7.11538	1.3813	4.31818	2.12438	6.5	1.37148	4.07407	1.54237	7.03704	1.31505	4.875	1.62354	6.58333	1.41165	4.64	1.97653	7.2	1.47196	4.28	1.98997	6.64	1.31909	4.68	1.8421	6.96	1.42829	5	1.70294	6.42857	1.46872	4.03704	1.67519	7.25926	1.34715	4.15385	2.40992	6.76923	1.30089	4.61538	1.44559
924	陆陆续续	One after another	neutral	5.06667	0.617914	4.24444	1.40058	5	1.249	7.11765	1.22714	5.17391	0.491026	4.65217	0.982052	4.76923	1.42289	6.65385	1.16421	4.95455	0.72225	3.81818	1.65145	5.24	1.0116	7.6	1.11803	5.09091	0.426401	4.13636	1.67034	5.16	1.28062	7	1.35401	5.04348	0.76742	4.34783	1.11227	4.84615	1.22286	7.23077	1.10662	5.25	0.452267	4.58333	1.1645	4.92308	1.5525
925	乱点鸳鸯	Cause an exchange of partners by mistake between two couples engaged to marry	negative	2.93617	1.35782	6.34043	1.33964	4.66667	1.6927	6.875	1.36249	3	1.22474	5.88	1.26886	4.95652	1.60902	6.86957	0.868873	2.86364	1.52114	6.86364	1.24577	4.4	1.75594	6.88	1.71561	2.72	1.4	6.6	1.44338	4.91667	1.66594	7.125	1.32902	3.18182	1.29601	6.04545	1.17422	4.41667	1.71735	6.625	1.37722	2.85714	1.35062	6.14286	1.46009	5.25	1.81534
926	乱乱哄哄	In noisy disorder	negative	2.91304	1.20786	5.97826	1.32479	4.26531	1.39606	7.10204	1.34234	2.96	1.30639	5.76	1.47986	4.72	1.45831	6.76	1.39284	2.85714	1.10841	6.2381	1.09109	3.79167	1.17877	7.45833	1.21509	2.86957	1.45553	5.91304	1.41142	4.2	1.52753	7.4	1.1547	2.95652	0.928256	6.04348	1.26053	4.33333	1.27404	6.79167	1.47381	2.92308	1.49786	5.84615	1.57301	4.53846	1.45002
927	乱说乱动	Be unruly in word or deed	negative	3.11765	1.01761	5.90196	1.05783	5.61702	1.82439	7.38298	1.1142	3.38462	0.993189	5.69231	1.19703	5.65217	2.01379	7.26087	1.09617	2.84	0.976458	6.12	0.848528	5.58333	1.66594	7.5	1.14208	2.98039	1.10436	5.94118	1.12092	5.91667	1.76725	7.375	1.20911	3.2549	0.913086	5.86275	1.00039	5.30435	1.86924	7.3913	1.03305	3.36	1.03602	5.76	1.26754	5.58333	2.06522
928	沦落风尘	Fall into prostitution	negative	3.21905	1.18469	5.82857	1.49652	3.97959	1.92018	6.44898	1.80348	2.90385	1.20879	5.90385	1.49849	3.91667	1.97631	6.08333	1.95419	3.5283	1.08493	5.75472	1.50519	4.04	1.90351	6.8	1.60728	2.96078	1.13068	6.15686	1.31716	3.96	1.92527	6.16	2.28546	3.46296	1.19295	5.51852	1.59883	4	1.95604	6.75	1.07339	2.6	1.11803	6.16	1.49108	4.15385	2.26738
929	罗马数字	Roman numerals	neutral	5	0	4	1.5667	5.39623	2.0413	7.18868	1.56962	5	0	5	0	4.55172	1.61657	6.89655	1.56627	5	0	3.04348	1.7183	6.41667	2.06243	7.54167	1.53167	5	0	3.86957	1.7915	5.44444	1.8674	6.85185	1.76948	5	0	4.13636	1.32001	5.34615	2.24397	7.53846	1.27219	5	0	5	0	4.8	1.69874
930	洛阳纸贵	Good writings make people copy them	neutral	4.7619	1.221	5.34286	1.307	4.06	1.43442	5.9	1.95093	4.62264	1.13046	5.30189	0.952424	4.24	1.53514	5.48	1.82848	4.90385	1.30248	5.38462	1.59845	3.88	1.33292	6.32	2.01494	4.76923	1.27749	5.53846	1.19577	3.91667	1.50121	5.83333	1.88049	4.75472	1.17515	5.15094	1.39223	4.19231	1.3862	5.96154	2.04901	4.44444	1.18754	5.37037	0.83887	4.16667	1.6967
931	落地有声	Something fell on the ground with a loud voice. describe people as strong and forceful in speaking and doing things.	positive	6.06522	1.06254	5.23913	1.47851	5.08163	1.65626	6.67347	1.59932	6.125	1.07592	5.66667	1.12932	4.68	1.57374	6.76	0.723418	6	1.06904	4.77273	1.68839	5.5	1.66812	6.58333	2.18526	5.82609	1.30217	5.21739	1.56544	5.25	1.35935	6.20833	1.99955	6.30435	0.702902	5.26087	1.42118	4.92	1.91311	7.12	0.927362	5.84615	1.3445	5.84615	0.898717	5.08333	1.50504
932	落荒而走	Plunge into the wilds and flee	negative	3.04167	1.27092	6	1.51587	4.11538	1.75626	6.90385	1.52444	2.68	1.10755	5.92	1.35154	4.28571	1.67458	6.46429	1.50264	3.43478	1.34252	6.08696	1.70329	3.91667	1.86307	7.41667	1.41165	2.58333	1.1389	5.91667	1.6129	3.80769	1.3862	6.88462	1.72805	3.5	1.25109	6.08333	1.44212	4.42308	2.043	6.92308	1.32433	2.38462	1.26085	6.15385	1.14354	4.14286	1.29241
933	落日余辉	The afterglow of the sunset	neutral	5.81905	1.36425	5.09524	1.71825	3.72	1.81872	7.5	1.34392	5.47059	1.22234	5.31373	1.449	3.12	1.76352	7.4	1.47196	6.14815	1.41964	4.88889	1.92958	4.32	1.70098	7.6	1.22474	5.96226	1.4671	4.98113	1.77038	3.72	2.09205	7.32	1.57374	5.67308	1.24808	5.21154	1.67258	3.72	1.54164	7.68	1.06927	5.5	1.44914	5.38462	1.55118	2.69231	1.79743
934	落叶归根	Fallen leaves return to the roots -- to revert to one's origin	positive	6.46809	1.17679	5.51064	2.2542	4.61224	2.1488	7.61224	1.15138	6.65217	1.22877	5.43478	2.27289	4.625	2.16318	7.5	1.02151	6.29167	1.12208	5.58333	2.28257	4.6	2.17945	7.72	1.27541	6.45455	1.18431	4.45455	2.26205	4.45833	2.30272	7.66667	1.27404	6.48	1.19443	6.44	1.82757	4.76	2.02649	7.56	1.04403	6.5	1.17851	4.3	2.26323	4.16667	2.51661
935	吕氏春秋	Lv's spring and autumn period	neutral	5.11111	0.745356	5.37778	1.05073	4.4375	1.2867	6.16667	1.94972	5	0.436436	5	0.816497	4.375	1.43898	6	1.588	5.21739	0.951388	5.73913	1.13688	4.5	1.14208	6.33333	2.27781	5	0.534522	5.27273	0.767297	4.34783	1.33514	5.82609	2.0372	5.21739	0.902347	5.47826	1.27456	4.52	1.26227	6.48	1.85113	5	0.447214	5.27273	1.00905	4.36364	1.43337
936	旅行结婚	Travel marriage	positive	6.90291	1.30245	6.61165	1.4635	5.91304	2.10635	7.41304	1.16573	6.36538	1.18865	6.21154	1.37679	5.6087	2.29107	7.43478	1.12112	7.45098	1.18851	7.01961	1.449	6.21739	1.90589	7.3913	1.23359	7.15385	1.30436	6.75	1.55771	6.08696	1.88084	7.21739	1.31275	6.64706	1.26212	6.47059	1.36166	5.73913	2.33972	7.6087	0.988071	6.73077	1.28243	6.53846	1.50282	5.72727	2.19504
937	旅途劳顿	On the journey	neutral	4.23913	1.0151	4.8913	1.28631	4.38776	1.84635	7.2449	0.924901	4.45455	1.05683	5.45455	0.911685	4.625	1.88386	6.95833	0.858673	4.04167	0.954585	4.375	1.37722	4.16	1.81842	7.52	0.918332	4	0.978019	5.08333	1.24819	4.125	1.72734	7.20833	0.883627	4.5	1.01183	4.68182	1.32328	4.64	1.95533	7.28	0.979796	4.25	0.965307	5.5	0.6742	4.25	1.95982
938	屡战屡胜	Win repeatedly	positive	7.34951	1.10887	7.27184	1.21425	5.81633	2.38636	7.34694	1.14657	7.42308	1.19388	7.32692	1.24808	5.04	2.4235	7.16	0.898146	7.27451	1.02134	7.21569	1.18851	6.625	2.10202	7.54167	1.35066	7.54717	1.20202	7.39623	1.32054	5.66667	2.51373	7.33333	1.27404	7.14	0.969115	7.14	1.08816	5.96	2.3	7.36	1.03602	7.66667	1.35873	7.48148	1.451	4.66667	2.57023
939	绿色汽车	Environmentally friendly car	neutral	5.93878	1.21464	5.02041	1.88735	5.08163	2.04976	7.04082	1.3988	5.8	1.19024	4.72	1.83757	4.12	1.71561	6.96	1.3687	6.08333	1.24819	5.33333	1.92617	6.08333	1.90917	7.125	1.454	5.88462	1.27521	5.26923	1.80128	5.16	2.0347	7.24	1.33167	6	1.16775	4.73913	1.98213	5	2.10589	6.83333	1.46456	5.42857	0.851631	4.71429	1.89852	3.84615	1.72463
940	绿水长流	Long flowing green water	positive	6.6383	1.07188	5.02128	2.11094	4.10417	1.62742	6.875	1.42359	6.82609	1.15413	5.13043	2.36075	3.83333	1.85722	7.16667	0.916831	6.45833	0.977093	4.91667	1.88626	4.375	1.34528	6.58333	1.76725	6.77273	1.15189	4.54545	2.19799	4.21739	1.85758	7.26087	1.32175	6.52	1.00499	5.44	1.98074	4	1.41421	6.52	1.44684	6.9	1.19722	4.5	2.50555	3.81818	2.18258
941	略加思索	At a single jet	neutral	5.3617	0.818948	5.14894	1.19744	6.2449	1.40728	7.38776	1.11461	5.26087	0.915393	5.34783	1.0273	5.95833	1.26763	6.91667	0.974308	5.45833	0.72106	4.95833	1.33447	6.52	1.50333	7.84	1.06771	5.3913	0.838783	5.21739	0.951388	6.52174	1.3774	7.3913	1.2699	5.33333	0.816497	5.08333	1.41165	6	1.41421	7.38462	0.982931	5.18182	0.98165	5.45455	1.12815	6.09091	1.30035
942	略有所闻	Heard about	neutral	5.34043	0.814985	4.48936	1.48723	5.45833	1.32019	7.125	1.16006	5.4	1	4.92	1.32035	5.07692	1.19743	6.88462	0.951921	5.27273	0.550482	4	1.54303	5.90909	1.34196	7.40909	1.33306	5.26087	0.810016	4.6087	1.64425	5.375	1.27901	7.04167	1.12208	5.41667	0.829702	4.375	1.34528	5.54167	1.38247	7.20833	1.21509	5.23077	1.01274	5	1.29099	5.21429	1.25137
943	骂骂咧咧	Be foul-mouthed; speak dirty words	negative	2.66667	1.02247	6.26667	1.48324	5.13725	1.84412	7.41176	1.00352	2.81818	1.09702	5.95455	1.67552	4.85185	1.95534	7.14815	0.907393	2.52174	0.947224	6.56522	1.23679	5.45833	1.69344	7.70833	1.0417	2.6087	1.2699	6.47826	1.30974	4.84615	1.75937	7.26923	1.15092	2.72727	0.7025	6.04545	1.64685	5.44	1.91659	7.56	0.820569	3	1.26491	6.09091	1.446	4.57143	2.06488
944	买办资本	Comprador capital	neutral	4.68085	0.980381	4.55319	1.61257	4.2449	1.73842	5.40816	2.27228	4.73913	0.963771	5	1	3.75	1.56733	5.75	1.82376	4.625	1.0135	4.125	1.96297	4.72	1.79165	5.08	2.62869	4.83333	0.816497	4.33333	1.8098	4.12	1.58955	5.32	2.41039	4.52174	1.12288	4.78261	1.38027	4.375	1.9068	5.5	2.16695	4.75	0.866025	5.25	0.621582	3.76923	1.48064
945	卖弄聪明	Appear clever	negative	3.02128	1.09325	5.7234	1.66423	5.23529	1.6922	7.07843	1.11073	2.82609	0.984063	5.56522	1.64665	4.92593	1.61545	6.88889	1.01274	3.20833	1.17877	5.875	1.70198	5.58333	1.74248	7.29167	1.19707	2.79167	0.977093	5.91667	1.79169	5.07692	1.64738	7.07692	1.26248	3.26087	1.17618	5.52174	1.53355	5.4	1.75594	7.08	0.953939	2.83333	1.02986	5.66667	1.77525	4.5	1.45444
946	满脸堆笑	Full of smiles	neutral	4.32381	1.66118	5.87619	1.15771	5.61538	1.75067	7.26923	1.13958	4.96364	1.76345	6	1.26198	5.44444	1.84669	7.18519	0.921414	3.62	1.21033	5.74	1.02639	5.8	1.65831	7.36	1.35031	4.54717	1.83519	5.88679	1.32521	5.92308	1.64738	7.34615	1.05612	4.09615	1.4452	5.86538	0.970725	5.30769	1.82799	7.19231	1.23351	5.37931	1.89763	6.03448	1.63626	5.71429	1.77281
947	满脸含笑	Smiley face	positive	6.29167	1.70054	5.70833	1.76199	6.3125	1.33936	7.33333	1.03827	6.54167	1.58743	6.04167	1.98865	6.21739	1.47576	7.26087	0.810016	6.04167	1.80529	5.375	1.46888	6.4	1.22474	7.4	1.22474	6.04167	1.73153	6.29167	1.30148	6.47826	1.08165	7.47826	1.03877	6.54167	1.66757	5.125	1.985	6.16	1.54596	7.2	1.04083	6.5	1.5667	7.08333	1.08362	6.45455	1.03573
948	满脸横肉	Full face	negative	2.66019	0.965619	6.15534	1.16953	4.28571	1.58114	6.42857	1.77951	2.54717	0.952043	6.03774	1.15961	4.08333	1.50121	6.29167	1.89918	2.78	0.974993	6.28	1.17872	4.48	1.66132	6.56	1.68523	2.56863	0.984985	6.03922	1.19935	4.41667	1.69184	6.29167	2.0319	2.75	0.947132	6.26923	1.13958	4.16	1.49108	6.56	1.52971	2.5	0.989949	6.03846	1.11286	4.25	1.71226
949	满满登登	Be filled with	neutral	5.87755	1.18379	5.22449	1.57143	5.05769	1.30479	6.17308	1.97753	5.96	1.20692	5.6	1.29099	4.81481	1.2721	6.85185	1.23113	5.79167	1.17877	4.83333	1.76109	5.32	1.31403	5.44	2.36432	5.96	1.39881	5.56	1.66032	5.11538	1.21085	6.38462	1.81278	5.79167	0.931533	4.875	1.42379	5	1.41421	5.96154	2.1444	5.92308	1.38212	6	1.1547	5.07143	1.32806
950	满盘皆输	Lose the whole game	negative	2.66981	1.11031	6.61321	1.22335	3.48936	1.86352	7.10638	1.4925	2.66038	1.23947	6.56604	1.37993	3.69565	1.8934	6.56522	1.77933	2.67925	0.97613	6.66038	1.05509	3.29167	1.85283	7.625	0.923721	2.60377	1.06228	6.75472	1.25431	3.91304	2.06514	6.82609	1.96913	2.73585	1.16274	6.4717	1.18652	3.08333	1.58572	7.375	0.76967	2.69231	1.19228	6.76923	1.50486	3.90909	2.11918
951	漫天大雪	Snow in the sky	neutral	5.42553	1.62514	6	1.38313	3.20408	1.77927	7.5102	1.12031	5.56	1.52971	6.36	1.03602	3	1.95789	7.48	1.15902	5.27273	1.7507	5.59091	1.62302	3.41667	1.58572	7.54167	1.10253	5.41667	1.6129	6.41667	1.01795	3.48	2.06398	7.68	1.06927	5.43478	1.67403	5.56522	1.59049	2.91667	1.41165	7.33333	1.16718	5.35714	1.59842	6.78571	0.699293	3.15385	2.26738
952	慢慢腾腾	Slowly	negative	3.51064	0.975178	5.07447	1.40642	5.5	1.71353	7.14583	1.14835	3.41667	1.05981	5.16667	1.30773	6	1.56038	7.25	0.73721	3.6087	0.891328	4.97826	1.52612	5	1.74456	7.04167	1.45898	3.65217	1.11227	4.84783	1.20071	5.33333	1.88049	7.33333	1.12932	3.375	0.824226	5.29167	1.57367	5.66667	1.55106	6.95833	1.16018	3.66667	1.1547	5.16667	0.57735	6.08333	1.67649
953	慢慢吞吞	Slowly	negative	3.64583	0.837666	5.0625	1.13749	5.72	1.7384	7.28	0.926701	3.48	0.87178	5	1.25831	6.16	1.59896	7.16	0.898146	3.82609	0.777652	5.13043	1.01374	5.28	1.79165	7.4	0.957427	3.70833	1.0417	5.08333	1.10007	6.16	1.62481	7.28	0.890693	3.58333	0.583592	5.04167	1.19707	5.28	1.76824	7.28	0.979796	3.46154	1.1266	5.15385	1.3445	6.30769	1.54837
954	忙中偷闲	Be busy with leisure	neutral	5.63265	1.43895	5.34694	1.42231	6.3125	1.75228	7.39583	1.00508	5.84	1.21381	5.48	1.1225	5.75	1.87083	7.16667	0.963087	5.41667	1.63964	5.20833	1.69344	6.875	1.454	7.625	1.0135	5.72	1.4	5.68	1.34536	6.41667	1.71735	7.33333	1.09014	5.54167	1.50302	5	1.44463	6.20833	1.81729	7.45833	0.931533	5.69231	1.25064	5.92308	1.03775	5.58333	1.97523
955	盲人摸象	On the basis of one-sided viewpoint	neutral	4.58696	0.883832	5.17391	1.30477	4.46154	1.89387	6.94231	1.63795	4.77273	0.751622	5	1.19523	4.53571	1.64389	6.85714	1.32537	4.41667	0.974308	5.33333	1.40393	4.375	2.18319	7.04167	1.96666	4.77273	0.81251	5.18182	1.29601	4.34615	1.67194	6.73077	1.66271	4.41667	0.928611	5.16667	1.34056	4.57692	2.11987	7.15385	1.61722	5.1	0.567646	5	1.56347	4.64286	1.49908
956	茫茫无际	Boundless	neutral	5.06383	1.22304	5.23404	1.52105	3.3	1.7291	6.96	1.4563	5.21739	1.34693	5.56522	1.40861	3.76	1.87705	6.64	1.49666	4.91667	1.10007	4.91667	1.58572	2.84	1.46287	7.28	1.36991	5	1.1547	5.27273	1.72328	3.44	1.78139	6.96	1.67033	5.12	1.30128	5.2	1.35401	3.16	1.7	6.96	1.24097	5.1	1.52388	5.7	1.63639	3.76923	2.0064
957	莽莽撞撞	Reckless	negative	3.40909	0.995763	5.75	1.08102	5.11538	1.73379	7.40385	0.913077	3.55	1.14593	5.7	0.656947	5.11111	1.76141	7.18519	0.878681	3.29167	0.858673	5.79167	1.35066	5.12	1.73973	7.64	0.907377	3.3913	1.07615	6	1	4.96	1.81384	7.24	0.925563	3.42857	0.92582	5.47619	1.12335	5.25926	1.67774	7.55556	0.891556	3.36364	1.20605	5.63636	0.80904	4.15385	1.62512
958	毛骨悚然	With one's hair standing on end	negative	2.66667	0.998348	6.78431	1.22375	3.72	1.60408	6.96	1.33951	2.6	1.04978	6.62	1.30759	4.03846	1.58697	6.38462	1.41639	2.73077	0.952095	6.94231	1.12744	3.375	1.58286	7.58333	0.928611	2.37255	0.999215	6.94118	1.25558	3.48	1.50333	7.08	1.41185	2.96078	0.915659	6.62745	1.18255	3.96	1.69509	6.84	1.28062	2.26923	1.07917	6.76923	1.39449	3.84615	1.81871
959	毛手毛脚	Do things recklessly	negative	3.63265	1.05463	5.7551	1.07103	5.09804	1.62794	7.45098	0.986179	3.56	0.916515	5.56	1.00333	5.38462	1.72225	7.23077	0.951113	3.70833	1.19707	5.95833	1.12208	4.8	1.5	7.68	0.988264	3.57692	0.856648	5.5	0.989949	4.73077	1.53773	7.46154	1.02882	3.69565	1.25896	6.04348	1.10693	5.48	1.66132	7.44	0.960902	3.71429	0.726273	5.42857	1.08941	4.5	1.74312
960	毛头小子	Younger	neutral	4.6087	1.37402	4.91304	1.53226	5.06383	1.4507	6.89362	1.25515	4.6087	1.4058	4.52174	1.67521	4.79167	1.35066	6.54167	1.17877	4.6087	1.37309	5.30435	1.29456	5.34783	1.5258	7.26087	1.25109	4.22727	1.23179	4.95455	1.3965	5.09091	1.34196	7.09091	1.57084	4.95833	1.42887	4.875	1.67624	5.04	1.56738	6.72	0.890693	4.27273	1.00905	4.36364	1.74773	4.72727	1.10371
961	冒冒失失	Presumptuous	negative	3.20833	0.988408	5.6875	1.29082	5.2449	1.61414	7.20408	1.07973	3.41667	1.01795	5.45833	1.53167	5.5	1.41421	6.54167	0.883627	3	0.932505	5.91667	0.974308	5	1.77951	7.84	0.85049	3.17391	0.984063	5.73913	1.35571	5.43478	1.23679	7.30435	1.18455	3.24	1.0116	5.64	1.25433	5.07692	1.89574	7.11538	0.993053	3.36364	0.80904	5.45455	1.57249	5.63636	1.20605
962	貌似强大	Look quite strong	neutral	4.07843	1.00184	5.34314	1.22268	5.08163	1.718	6.81633	1.60304	3.96	1.15987	5.5	0.994885	5.125	1.62354	6.58333	1.5299	4.19231	0.81742	5.19231	1.40082	5.04	1.83666	7.04	1.67033	4.36538	1.12073	5.19231	1.13826	4.76	1.66533	6.76	1.80924	3.78	0.763718	5.5	1.29756	5.41667	1.74248	6.875	1.39292	4.15385	1.34736	5.46154	0.811456	5.07692	1.65638
963	没大没小	Show no respect for elders	negative	3.40426	1.34584	5.65957	1.6455	5.06122	1.50566	7.26531	1.15064	3.30435	1.10514	5.52174	1.47308	5.04167	1.70623	6.83333	1.0495	3.5	1.56038	5.79167	1.81729	5.08	1.32035	7.68	1.10755	3.04167	0.954585	5.70833	1.82921	5.3913	1.588	7.21739	1.27766	3.78261	1.59421	5.6087	1.46905	4.76923	1.39449	7.30769	1.04954	2.91667	0.792961	5.5	1.73205	5.18182	2.0405
964	没皮没脸	No skin and no face	negative	2.6	1.00905	5.84444	1.9651	5.22917	1.69153	7.22917	1.15297	2.63636	1.0486	5.59091	2.15272	5.69565	1.52061	6.86957	1.01374	2.56522	0.992063	6.08696	1.78155	4.8	1.75594	7.56	1.19304	2.52174	1.08165	6	2.04495	5.72	1.56844	7.36	1.15036	2.68182	0.945484	5.68182	1.91203	4.69565	1.69048	7.08696	1.16436	2.54545	1.03573	5.27273	2.4532	5.69231	1.60128
965	没轻没重	Rude	negative	3.44681	0.995828	5.48936	1.12041	5.08	1.73605	7.26	1.22574	3.48	1.1225	5.4	1.1547	5.64	1.70489	7.32	1.06927	3.40909	0.854071	5.59091	1.09801	4.52	1.61038	7.2	1.38444	3.47826	1.16266	5.3913	1.11759	4.88	1.83303	7.24	1.50776	3.41667	0.829702	5.58333	1.1389	5.28	1.64621	7.28	0.890693	3.23077	1.30089	5.69231	1.03155	5.61538	1.98068
966	没上没下	Disrespectful	negative	3.55556	1.03475	5.75556	1.04785	4.95918	1.56736	6.7551	1.66497	3.625	1.09594	5.875	0.946963	4.84	1.65025	6.8	1.1547	3.47619	0.980767	5.61905	1.16087	5.08333	1.50121	6.70833	2.09511	3.59091	1.05375	5.86364	0.940894	4.73913	1.62976	6.52174	2.08609	3.52174	1.03877	5.65217	1.15242	5.15385	1.51505	6.96154	1.18257	3.46154	1.05003	6.15385	0.987096	4.83333	2.24958
967	没头苍蝇	Headless fly; aimless fly	negative	3.06383	1.24069	6.02128	1.71299	4.96078	1.62432	6.62745	1.52264	2.86957	1.25424	5.65217	1.72175	5.03846	1.28002	6.5	1.2083	3.25	1.22474	6.375	1.66322	4.88	1.94336	6.76	1.80924	3.09091	1.41115	5.77273	1.60154	5.08	1.6052	6.84	1.31276	3.04	1.09848	6.24	1.80924	4.84615	1.66595	6.42308	1.70113	2.7	1.49443	5.9	1.59513	4.84615	1.40512
968	没着没落	Unsteady; unsure; anxious	negative	3.46939	1.19202	5.65306	1.57521	4.30189	1.64767	7	1.30089	3.44	1.19304	5.72	1.6207	4.17241	1.5369	6.82759	1.28366	3.5	1.21584	5.58333	1.55806	4.45833	1.7932	7.20833	1.31807	3.61538	1.20256	5.96154	1.53573	4.22222	1.50214	6.81481	1.59415	3.30435	1.18455	5.30435	1.57926	4.38462	1.81278	7.19231	0.895287	3.57143	1.08941	5.92857	1.49174	4.4	1.72378
969	眉高眼低	Adopt different attitudes and measures under different circumstances	negative	3.69565	1.07227	5.5	1.32916	5.20755	1.43257	6.24528	1.79642	3.91304	1.08347	5.17391	1.33662	4.85714	1.4836	6.42857	1.50132	3.47826	1.03877	5.82609	1.26678	5.6	1.29099	6.04	2.09125	4	1.04881	5.42857	1.20712	5.19231	1.16685	6.07692	1.71868	3.44	1.04403	5.56	1.44568	5.22222	1.67179	6.40741	1.88637	4.1	0.994429	5.1	1.59513	5.14286	1.46009
970	眉毛胡子	Eyebrow beard	neutral	4.79545	0.509425	4.06818	1.63391	5.5	1.91485	7.5	1.12894	4.73913	0.540824	4.69565	0.97397	4.67857	1.61138	7.07143	1.01575	4.85714	0.478091	3.38095	1.93588	6.45833	1.81729	8	1.06322	5	0	3.85714	1.71131	5.64	1.8	7.48	1.22882	4.6087	0.656376	4.26087	1.57299	5.37037	2.04089	7.51852	1.05139	5	0	4.45455	1.21356	5.28571	1.5898
971	眉目传情	Send speechless messages	neutral	5.87234	1.45389	5.74468	1.56689	6.13725	1.5623	7.13725	1.41449	5.82609	1.43502	5	1.67874	5.69231	1.66779	6.80769	1.72091	5.91667	1.50121	6.45833	1.06237	6.6	1.32288	7.48	0.918332	5.91304	1.47442	6.08696	1.41142	6.28	1.30767	7.44	0.869866	5.83333	1.46456	5.41667	1.66594	6	1.78885	6.84615	1.75937	5.45455	1.63485	5.72727	1.55505	6.07692	1.60528
972	眉目如画	As pretty as a picture	positive	7.12766	1.24441	5.42553	1.94204	5.12245	1.64104	6.87755	1.52251	7.08	1.22202	5.48	2.14321	4.6	1.65831	6.64	1.49666	7.18182	1.29601	5.36364	1.7333	5.66667	1.46456	7.125	1.5411	7.26087	1.21421	5.52174	1.97414	5.16	1.59896	6.72	1.72047	7	1.28537	5.33333	1.94862	5.08333	1.71735	7.04167	1.30148	7.07692	1.25576	5.46154	2.18386	4.76923	1.92154
973	眉清目秀	Have beautiful features	positive	6.84906	1.04008	5.38679	1.7434	4.91667	1.71145	7.1875	0.981884	6.66038	1.01798	5.4717	1.84603	4.04167	1.33447	6.91667	1.01795	7.03774	1.03705	5.30189	1.64767	5.79167	1.61458	7.45833	0.883627	6.84615	1.07347	5.05769	1.94446	5.33333	1.52277	7.20833	1.06237	6.85185	1.01698	5.7037	1.47469	4.5	1.81779	7.16667	0.916831	6.44	0.916515	5.12	2.08806	4.33333	1.30268
974	每下愈况	Steadily deteriorate	negative	3.40426	1.22757	5.46809	1.73018	4.1	1.58114	6.1	1.91929	3.41667	1.38051	5.125	1.70198	4.4	1.25831	5.88	1.78699	3.3913	1.07615	5.82609	1.7229	3.8	1.82574	6.32	2.05589	3.5	1.14208	5.45833	1.7932	4.12	1.78699	6.2	1.82574	3.30435	1.32921	5.47826	1.70213	4.08	1.38203	6	2.04124	3.41667	1.31137	5	1.85864	4.15385	1.40512
975	美其名曰	The beautiful name says	neutral	4.75728	1.15016	5.25243	1.1692	4.98039	1.37826	6.96078	1.18255	4.52941	1.08357	5.05882	1.10294	4.92308	0.89098	6.69231	1.04954	4.98077	1.17974	5.44231	1.21128	5.04	1.7673	7.24	1.26754	4.80392	0.980196	5.31373	0.706829	4.64	1.18603	7	1.19024	4.71154	1.30364	5.19231	1.49559	5.30769	1.49048	6.92308	1.19743	4.76923	0.815239	5.23077	0.58704	4.69231	1.03155
976	闷声不语	Silence	negative	3.63043	1.12267	4.8587	1.49318	5.5	1.78714	7.14	1.1954	3.32	1.10755	5.04	1.51327	5.48	1.63605	6.92	1.22202	4	1.04881	4.64286	1.476	5.52	1.96044	7.36	1.15036	3.72727	1.2792	4.93182	1.63515	5.48	1.80555	7	1.22474	3.54167	0.977093	4.79167	1.38247	5.52	1.80555	7.28	1.17331	3.38462	1.26085	5.15385	1.72463	5	1.87083
977	闷声闷气	Muffled	negative	3.625	0.872309	5.21154	1.28979	5.32	1.51779	6.98	1.31692	3.92157	0.796069	5.13725	1.1139	5.36	1.57797	6.76	1.23423	3.33962	0.853576	5.28302	1.44618	5.28	1.48661	7.2	1.38444	3.61538	0.795917	5.23077	1.1651	5.25	1.53934	7.29167	1.26763	3.63462	0.950312	5.19231	1.41475	5.38462	1.52517	6.69231	1.31967	3.84615	0.784465	5.30769	1.01071	5.33333	1.87487
978	蒙昧无知	Ignorance	negative	3.08333	0.985714	4.8125	1.84109	4.4898	1.8498	6.85714	1.48605	3.375	0.875388	4.75	1.51083	5.12	1.64114	6.32	1.4922	2.79167	1.02062	4.875	2.15311	3.83333	1.85722	7.41667	1.28255	3.04167	0.954585	4.95833	1.89918	4.16667	1.92617	7.08333	1.34864	3.125	1.03472	4.66667	1.8098	4.8	1.75594	6.64	1.60416	3.5	0.904534	5.08333	1.67649	5.07692	2.13937
979	蒙蒙胧胧	Obscure	neutral	4.6087	1.18281	3.93478	1.55495	4.5102	1.29297	7.06122	1.19736	4.2	1.19024	4.48	1.19443	4.72	1.42945	6.64	1.35031	5.09524	0.995227	3.28571	1.70713	4.29167	1.12208	7.5	0.834058	4.72727	1.38639	3.86364	1.58251	4.79167	1.28466	6.91667	1.50121	4.5	0.978019	4	1.56038	4.24	1.26754	7.2	0.816497	4.30769	1.49358	4.07692	1.25576	5.07692	1.5525
980	蒙蒙细雨	Drizzle	neutral	5.91489	1.15777	4.06383	1.85805	3.98	1.65973	7.06	1.50387	5.625	1.1726	4.41667	1.81579	3.44	1.63503	6.84	1.72434	6.21739	1.0853	3.69565	1.86924	4.52	1.5308	7.28	1.24231	5.92	1.15181	3.56	1.98074	3.76	1.47986	7.04	1.7673	5.90909	1.1916	4.63636	1.55978	4.2	1.82574	7.08	1.22202	6	1.29099	3.69231	2.05688	3.07692	1.49786
981	蒙冤受屈	Unjustly aggrieved	negative	2.38235	1.08129	7.02941	1.27003	3.25532	1.79937	7.04255	0.832948	2.5	1.19949	6.94	1.37633	3.45455	1.96946	7	0.816497	2.26923	0.952095	7.11538	1.16575	3.08	1.6563	7.08	0.862168	2.13462	1.01032	7.19231	1.28397	3.27273	1.88179	7.09091	0.867898	2.64	1.10213	6.86	1.24556	3.24	1.76257	7	0.816497	2.16	1.06771	7.12	1.42361	4	2.44949
982	猛虎下山	A fierce tiger sprang down from the top of the mountain	neutral	5.06522	1.9253	6.54348	1.51594	3.41176	1.74558	6.76471	1.59484	4.95455	2.05814	6.54545	1.50324	3.19231	1.76679	7.03846	1.14824	5.16667	1.83366	6.54167	1.5598	3.64	1.72916	6.48	1.93907	4.84	2.19241	6.92	1.03763	3.72	2.07204	6.68	1.6	5.33333	1.55991	6.09524	1.86828	3.11538	1.33647	6.84615	1.61722	5.07692	2.326	7	1.1547	3.61538	2.06311
983	弥天大罪	Heinous crime	negative	2.19417	1.19688	7.15534	1.41253	3.06	1.69525	6.6	1.6413	1.90385	1.19245	7.26923	1.6582	3.19231	1.8115	6.53846	1.42073	2.4902	1.13794	7.03922	1.11285	2.91667	1.58572	6.66667	1.88049	1.92308	1.04499	7.34615	1.29682	2.88462	1.65715	6.69231	1.71509	2.47059	1.28613	6.96078	1.50945	3.25	1.75078	6.5	1.588	1.73077	1.11562	7.46154	1.5292	2.64286	1.64584
984	迷离恍惚	Brown study	negative	3.625	1.16006	5.39583	1.56748	4.25	1.70731	6.52083	1.70093	3.5	1.14208	5.25	1.70038	4.45833	1.8877	6.08333	1.83958	3.75	1.18872	5.54167	1.444	4.04167	1.51741	6.95833	1.45898	3.54167	1.06237	5.54167	1.38247	4.12	1.9218	6.16	2.13464	3.70833	1.26763	5.25	1.75078	4.3913	1.46905	6.91304	0.949308	3.58333	0.996205	5.33333	1.49747	4.15385	2.23033
985	迷迷糊糊	In a daze	negative	3.7234	1.09747	5.23404	1.43273	4.83673	1.37457	7.36735	1.01435	3.56522	1.16096	5.21739	1.65025	5.125	1.454	7.04167	1.0417	3.875	1.03472	5.25	1.22474	4.56	1.26095	7.68	0.9	3.5	1.01183	5.13636	1.4895	5.17391	1.37021	7.3913	0.891328	3.92	1.15181	5.32	1.40594	4.53846	1.33359	7.34615	1.12933	3.5	1.17851	4.8	1.8738	5.27273	1.79393
986	迷迷茫茫	Obsessed with confusion	negative	3.78261	1.09368	5.13043	1.30994	4.27451	1.29736	6.88235	1.14275	3.5	0.801784	4.86364	1.45718	4.57692	1.33186	6.61538	1.02282	4.04167	1.26763	5.375	1.13492	3.96	1.20692	7.16	1.21381	3.6087	1.03305	5	1.53741	4.32	0.852447	6.72	1.27541	3.95652	1.14726	5.26087	1.05388	4.23077	1.63236	7.03846	0.99923	3.09091	0.831209	5	1.94936	4.61538	0.869718
987	迷迷蒙蒙	Obsessed with obscuring	neutral	4.17021	1.04921	4.74468	1.48131	4.86275	1.4835	6.98039	1.10436	4.25	1.11316	5.125	0.946963	5.11111	1.42325	6.74074	1.22765	4.08696	0.99604	4.34783	1.8243	4.58333	1.5299	7.25	0.896854	4.08	1.11505	4.6	1.41421	4.69231	1.37896	6.80769	1.29674	4.27273	0.984732	4.90909	1.57084	5.04	1.59374	7.16	0.85049	4	1	5.23077	0.83205	5	1.30089
988	迷迷怔怔	Confused	negative	3.47826	0.960072	5.04348	1.5196	4.98	1.68414	6.54	1.56766	3.47826	1.16266	4.91304	1.53484	5.08	1.55242	6.52	1.08474	3.47826	0.730477	5.17391	1.52709	4.88	1.83303	6.56	1.95959	3.57143	1.02817	4.80952	1.6619	5.04	1.90351	6.36	1.89033	3.4	0.912871	5.24	1.39284	4.92	1.46969	6.72	1.17331	3.4	1.3499	4.9	1.85293	5.15385	1.81871
989	密密层层	Packed closely layer upon layer	neutral	4.61364	0.894841	5.04545	1.18035	4.72549	1.09688	6.37255	1.91792	4.90909	0.610159	5.22727	0.428932	4.74074	1.34715	6.51852	1.28214	4.31818	1.04135	4.86364	1.61232	4.70833	0.750604	6.20833	2.46681	4.59091	0.959121	4.90909	1.306	5	1.13137	6.19231	2.00038	4.63636	0.847711	5.18182	1.05272	4.44	1.00333	6.56	1.85023	4.83333	0.834847	5.41667	0.514929	5.07143	1.32806
990	密密麻麻	Dense	neutral	4.04255	1.36664	5.44681	1.45675	4.85106	1.36698	7.06383	1.1685	4.95652	0.638055	4.73913	1.32175	5.18182	0.852803	6.68182	1.04135	3.16667	1.30773	6.125	1.2619	4.56	1.66032	7.4	1.19024	4.13043	1.42396	5.43478	1.59049	4.73913	1.28691	6.95652	1.4295	3.95833	1.33447	5.45833	1.35066	4.95833	1.45898	7.16667	0.868115	5.09091	0.831209	4.81818	1.72152	4.81818	0.750757
991	密密实实	Dense and tight	neutral	5.08333	1.26883	5.02083	1.71959	4.93878	1.21464	7.04082	1.15396	5.5	1.02151	4.95833	1.70623	4.625	1.0135	6.95833	0.690253	4.66667	1.37261	5.08333	1.76725	5.24	1.33167	7.12	1.48099	5.04348	1.39734	4.56522	2.1283	4.65217	1.0273	7	1.446	5.12	1.16619	5.44	1.12101	5.19231	1.32723	7.07692	0.844894	5.36364	1.12006	4.36364	2.15744	4.54545	1.12815
992	绵里藏针	A ruthless character behind a gentle appearance	negative	3.34783	1.6762	6.1087	1.46406	3.78	1.54246	6.58	1.69139	3.40909	1.89383	5.86364	1.55212	3.88462	1.50537	6.34615	1.74224	3.29167	1.48848	6.33333	1.37261	3.66667	1.60615	6.83333	1.63299	3.125	1.77697	6.58333	1.34864	3.72	1.33915	6.56	1.93821	3.59091	1.56324	5.59091	1.43623	3.84	1.74833	6.6	1.44338	3.16667	2.2088	6.58333	1.24011	3.78571	1.42389
993	绵绵无尽	Endless	neutral	5.2	0.828775	4.75	1.18386	4.38776	1.42619	6.69388	1.43184	5.12245	0.832483	4.87755	0.6962	4.72	1.42945	6.2	1.58114	5.27451	0.826521	4.62745	1.50945	4.04167	1.36666	7.20833	1.06237	5.12245	0.807069	4.67347	1.16168	4.52	1.38804	6.6	1.63299	5.27451	0.850375	4.82353	1.21171	4.25	1.48177	6.79167	1.21509	5.25	0.84699	4.875	0.679674	4.69231	1.6525
994	绵延起伏	Undulating	neutral	5.95652	1.09456	5.06522	1.48177	3.82979	1.50823	7.12766	1.13477	5.91304	1.12464	5.47826	1.03877	3.45833	1.47381	7.08333	0.880547	6	1.08711	4.65217	1.74795	4.21739	1.47576	7.17391	1.37021	6.04545	1.17422	5.04545	1.46311	3.54545	1.65406	7.27273	1.24142	5.875	1.03472	5.08333	1.5299	4.08	1.35154	7	1.04083	6	1.09545	5.63636	0.80904	3.45455	1.69491
995	面红耳赤	Flush with shame	negative	3.46809	1.26579	6.3617	1.32576	5.32653	1.83016	7.5102	0.981547	3.125	1.191	6.33333	1.16718	5.70833	1.87615	7.125	0.899879	3.82609	1.26678	6.3913	1.49967	4.96	1.74356	7.88	0.927362	3.33333	1.27404	6.5	1.38313	5.58333	1.79169	7.41667	1.01795	3.6087	1.2699	6.21739	1.27766	5.08	1.86905	7.6	0.957427	2.91667	1.24011	6.66667	0.887625	6	1.90693
996	面黄肌瘦	Sallow and emaciated	negative	2.92683	0.905269	4.87805	1.72039	4.04545	1.8038	7.13636	1.39085	3.04545	1.0455	5.13636	1.55212	3.83333	1.46456	6.83333	1.49395	2.78947	0.713283	4.57895	1.8949	4.3	2.15455	7.5	1.19208	2.8125	0.981071	5.125	1.62788	3.95455	1.7037	7.22727	1.066	3	0.866025	4.72	1.79165	4.13636	1.93453	7.04545	1.67552	3.1	0.994429	5.4	1.42984	4.18182	1.77866
997	面目皆非	Change completely in appearance	negative	3.61224	1.56546	6.30612	1.31028	4.03922	1.62432	6.86275	1.40028	3.36	1.57797	5.96	1.33791	4.61538	1.79057	6.73077	1.15092	3.875	1.5411	6.66667	1.20386	3.44	1.19304	7	1.63299	3.19231	1.41476	6.53846	1.20767	3.92	1.57903	6.8	1.47196	4.08696	1.62125	6.04348	1.39734	4.15385	1.68979	6.92308	1.3542	3.14286	1.46009	6.21429	1.18831	4.30769	1.79743
998	面如死灰	A white and bloodless complexion	negative	2.85714	1.06001	5.72381	1.36927	3.88	1.52047	6.68	1.63433	2.94231	1.1447	5.75	1.34128	4.07692	1.32433	6.46154	1.55514	2.77358	0.973525	5.69811	1.40856	3.66667	1.711	6.91667	1.71735	2.81132	1.02012	5.77358	1.35365	4.03846	1.45549	6.57692	1.8149	2.90385	1.10719	5.67308	1.39637	3.70833	1.60106	6.79167	1.444	2.77778	1.1209	5.81481	1.17791	4.21429	1.47693
999	面无惧色	No fear	neutral	5.84091	1.44581	5.27273	1.99259	6.07692	1.88748	7.01923	1.11127	6.19048	1.36452	5.71429	1.58565	5.2963	2.01561	6.85185	1.26198	5.52174	1.47308	4.86957	2.26243	6.92	1.32035	7.2	0.912871	5.875	1.51263	4.95833	2.31214	6.11538	1.98649	6.92308	1.23038	5.8	1.39925	5.65	1.49649	6.03846	1.82166	7.11538	0.993053	6.16667	1.40346	5.66667	1.87487	5.14286	2.21384
1000	面有愧色	Guilty look	neutral	4.21739	0.98687	5.41304	1.25744	5.46	1.63145	7.02	1.28556	4.21739	1.0853	5.08696	1.31125	5.84	1.40475	6.76	1.23423	4.21739	0.902347	5.73913	1.13688	5.08	1.77764	7.28	1.30767	4.2381	0.995227	5.04762	1.39557	5.52	1.41774	7.12	1.36382	4.2	1	5.72	1.06145	5.4	1.84842	6.92	1.22202	4.4	1.3499	4.6	1.64655	5.84615	1.51911
1001	面有喜色	A complacement look；a joyful look	positive	6.52083	1.07168	5.70833	1.47256	6.40426	1.4395	7.34043	1.35577	6.33333	1.09014	5.70833	1.48848	6.27273	1.2792	7.13636	1.03719	6.70833	1.0417	5.70833	1.48848	6.52	1.5843	7.52	1.5843	6.72	1.17331	5.72	1.64621	6.45455	1.22386	7.63636	1.09307	6.30435	0.926125	5.69565	1.29456	6.36	1.62993	7.08	1.52534	6.38462	1.38675	5.76923	1.69085	6.3	1.05935
1002	妙笔生花	Write like an angel	positive	7.12264	1.02076	6.41509	1.44003	6.06522	1.63846	7.08696	1.18932	7.03774	0.919077	6.58491	1.36486	5.65217	1.5553	6.69565	1.01957	7.20755	1.1156	6.24528	1.50519	6.47826	1.64785	7.47826	1.23838	7.30189	0.972406	6.60377	1.26095	6.04545	1.91429	7.27273	1.3159	6.9434	1.04541	6.22642	1.58892	6.08333	1.38051	6.91667	1.05981	7.22222	1.01274	6.92593	1.26873	5.36364	1.9633
1003	妙语如珠	A magic word like a pearl	positive	6.7234	1.31384	5.97872	1.48162	6.12766	1.56895	7.42553	1.17482	6.73913	1.35571	6.43478	1.23679	5.58333	1.66594	7.125	1.32902	6.70833	1.30148	5.54167	1.58743	6.69565	1.25896	7.73913	0.915393	6.96	1.05987	5.96	1.6452	5.82609	1.7229	7.30435	1.49042	6.45455	1.53459	6	1.30931	6.41667	1.38051	7.54167	0.779028	7.15385	0.987096	6.61538	1.19293	5.15385	1.90815
1004	灭门之祸	Exterminate the whole family	negative	1.80583	0.980779	7.40777	1.67119	2.71429	1.62019	7.06122	1.19736	1.60377	0.987219	7.37736	2.02129	2.96	1.92527	6.84	1.31276	2.02	0.936559	7.44	1.21487	2.45833	1.21509	7.29167	1.0417	1.68	0.819158	7.66	1.27151	2.70833	1.73153	6.95833	1.36666	1.92453	1.10678	7.16981	1.95857	2.72	1.54164	7.16	1.02794	1.30769	0.470679	8.11538	0.993053	2.92308	2.17798
1005	民办小学	Private primary school	neutral	4.92857	0.600522	4.47619	1.27333	4.38	1.70102	7.2	1.2454	5.15	0.48936	4.8	0.951453	4.07692	1.57285	7	1.09545	4.72727	0.631085	4.18182	1.46828	4.70833	1.80529	7.41667	1.38051	5.10526	0.567131	4.42105	1.46499	4.88	1.66633	7.12	1.20139	4.78261	0.599736	4.52174	1.12288	3.88	1.61555	7.28	1.30767	5.33333	0.707107	4.66667	1.41421	4.64286	1.59842
1006	民富国强	The people are rich and the country is strong	positive	7.8	1.06879	7.15238	1.59796	3.8125	2.30315	7.64583	0.978266	8.07407	1.06136	7.62963	1.53323	3.125	2.25181	7.45833	0.977093	7.5098	1.00742	6.64706	1.52084	4.5	2.18692	7.83333	0.963087	7.92157	0.95589	7.17647	1.55828	4.04167	2.40433	7.75	0.989071	7.68519	1.16269	7.12963	1.64886	3.58333	2.2247	7.54167	0.977093	8.07407	0.873804	7.59259	1.50024	3.41667	2.46644
1007	民穷财尽	The means of the people have been used up	negative	2.57447	1.17482	6.42553	1.75381	3.30435	1.51833	6.30435	1.82415	2.6	1.25831	6.48	1.82848	3.30435	1.42812	6.26087	1.32175	2.54545	1.10096	6.36364	1.70561	3.30435	1.63581	6.34783	2.24841	2.30435	1.10514	6.91304	1.44326	3.31818	1.32328	6.63636	1.39882	2.83333	1.20386	5.95833	1.92194	3.29167	1.70623	6	2.12644	2.38462	1.3253	6.76923	1.73944	3.45455	1.29334
1008	民生凋敝	People's livelihood depressed	negative	3.42857	1.38444	5.97959	1.28273	3.7551	1.54826	5.89796	2.13351	3.64	1.46856	5.96	1.33791	3.96	1.42829	5.4	1.89297	3.20833	1.28466	6	1.25109	3.54167	1.66757	6.41667	2.28257	3.23077	1.39449	6	1.38564	3.43478	1.23679	5.91304	2.02064	3.65217	1.36877	5.95652	1.18622	4.03846	1.75455	5.88462	2.26851	3.57143	1.34246	6.14286	1.29241	3.66667	1.557
1009	民俗学家	Folklorist	neutral	5.2619	0.543679	4.66667	1.35551	4.54167	1.051	5.97917	1.91844	5.25	0.55012	5.25	0.55012	4.4	1.29099	6.24	1.45144	5.27273	0.550482	4.13636	1.64159	4.69565	0.702902	5.69565	2.32447	5.3913	0.656376	4.86957	1.35862	4.56	1.00333	6.16	1.74833	5.10526	0.315302	4.42105	1.34643	4.52174	1.12288	5.78261	2.10964	5.41667	0.668558	5.41667	0.668558	4.46154	1.19829
1010	民政局长	Bureau of civil affairs	neutral	4.97938	0.352945	4.52577	1.38514	3.53061	1.55593	6.97959	1.5744	5	0.210819	4.84783	0.595068	3.41667	1.5299	6.875	1.51263	4.96078	0.445456	4.23529	1.78424	3.64	1.60416	7.08	1.6563	5	0.288675	4.63265	1.16715	3.6	1.52753	7.04	1.48549	4.95833	0.410414	4.41667	1.58226	3.45833	1.61458	6.91667	1.69184	5	0	4.79167	0.779028	3.38462	1.55662
1011	名垂千古	Have an everlasting name	positive	6.93617	1.22304	6.23404	2.00231	4.41667	1.91115	7.10417	1.15297	6.95652	1.39734	6.13043	2.32192	3.82609	1.77488	7.04348	0.705708	6.91667	1.05981	6.33333	1.6854	4.96	1.90351	7.16	1.46287	7.04545	1.2527	5.77273	2.22394	4.73913	2.09366	7.13043	0.814881	6.84	1.21381	6.64	1.72916	4.12	1.71561	7.08	1.41185	7	1.33333	5.3	2.58414	4	1.89737
1012	名士风流	Unconventional ways of scholars	neutral	5.75	1.25218	5.26923	1.38108	4.84615	1.68482	6.61538	1.67043	5.47059	1.06495	5.33333	1.21106	4.2963	1.5396	6.59259	1.3376	6.01887	1.36566	5.20755	1.53621	5.44	1.66032	6.64	1.9975	5.96154	1.04715	5.28846	1.1604	4.73077	1.63848	6.42308	1.8149	5.53846	1.40673	5.25	1.58269	4.96154	1.75455	6.80769	1.52366	5.46154	0.760567	5.11538	0.951921	4.5	1.69842
1013	名震中外	Well known in the world	positive	7.23558	1.01675	6.86538	1.23899	4.4375	2.26825	7.33333	0.952786	7.27778	1.08882	6.88889	1.38273	3.69565	1.8934	7.17391	0.984063	7.19	0.941612	6.84	1.0759	5.12	2.40347	7.48	0.918332	7.42453	1.06245	6.92453	1.22237	4.26087	2.19953	7.43478	0.992063	7.03922	0.937247	6.80392	1.26522	4.6	2.36291	7.24	0.925563	7.46429	1.10494	7.17857	1.21879	3.36364	1.91169
1014	名正言顺	Be right and proper	positive	6.41667	1.18202	5.04167	1.99956	5.58491	1.71458	7.4717	1.08493	6.64	1.25433	5.56	2.04287	5.07143	1.80388	7.28571	1.21281	6.17391	1.07247	4.47826	1.83079	6.16	1.43411	7.68	0.9	6.625	1.31256	5.29167	1.87615	5.59259	1.62337	7.25926	1.28879	6.20833	1.02062	4.79167	2.12601	5.57692	1.8368	7.69231	0.788377	6.69231	1.49358	5.53846	2.43637	5.53333	1.9223
1015	明白了当	Straightforward	neutral	5.82222	1.3019	4.84444	1.73147	6.32653	1.16168	6.97959	1.10849	5.90909	1.306	5.27273	1.24142	5.84	1.02794	6.56	1.15758	5.73913	1.32175	4.43478	2.04108	6.83333	1.09014	7.41667	0.880547	5.82609	1.49703	5	1.83402	6.52	1.22882	7.08	1.18743	5.81818	1.09702	4.68182	1.64422	6.125	1.07592	6.875	1.03472	6	1.53741	5.16667	1.33712	5.76923	1.09193
1016	明窗净几	A neat desk before a bright window	positive	6.54348	1.22396	5.04348	1.89686	5.56	1.7975	6.4	2.02031	6.65217	1.22877	5.3913	1.87663	4.92	1.86905	6.92	1.32035	6.43478	1.23679	4.69565	1.8934	6.2	1.5	5.88	2.45493	6.59091	1.18157	4.90909	1.41115	5.46154	1.83806	6.38462	1.83471	6.5	1.28537	5.16667	2.27781	5.66667	1.78561	6.41667	2.24416	6.5	1.43372	5	1.56347	4.92857	2.01778
1017	明镜高悬	An honest official	positive	6.61224	1.44072	5.7551	2.01588	3.87755	2.00658	6.59184	1.65729	6.72	1.51438	6.4	1.38444	3.45833	2.06375	6.95833	1.08264	6.5	1.38313	5.08333	2.35753	4.28	1.90438	6.24	2.02649	6.44	1.55671	5.68	2.15484	4.125	1.9407	6.70833	1.70623	6.79167	1.31807	5.83333	1.90347	3.64	2.07926	6.48	1.63605	6.30769	1.79743	6.61538	1.38675	3.58333	2.19331
1018	明里暗里	In the dark	neutral	4.15217	1.13465	5.30435	0.695048	4.57447	1.65167	6.78723	1.39776	4.31818	1.24924	5.18182	0.501081	4.08696	1.44326	6.47826	1.08165	4	1.02151	5.41667	0.829702	5.04167	1.73153	7.08333	1.6129	4.24	1.23423	5.24	0.778888	4.08696	1.70329	6.47826	1.62003	4.04762	1.02353	5.38095	0.589592	5.04167	1.48848	7.08333	1.10007	4.30769	1.54837	5.15385	0.5547	3.54545	1.57249
1019	明枪暗箭	Attack by overt and covert means	negative	2.85417	1.27145	6.05208	1.39238	3.22449	1.53114	7.10204	1.26235	2.32	0.988264	6	1.80278	3.58333	1.83958	6.83333	1.30773	3.43478	1.30823	6.1087	0.768063	2.88	1.0924	7.36	1.18603	2.70833	1.19707	5.97917	1.44823	3.30435	1.57926	7.13043	1.28997	3	1.35133	6.125	1.36135	3.15385	1.51505	7.07692	1.26248	2.23077	1.09193	6.15385	1.90815	3.54545	1.91644
1020	明修栈道	Deceive someone	neutral	5.29787	1.08176	5.57447	1.15617	4.71429	1.79118	6.83673	1.34392	5.28	1.30767	5.72	0.842615	4.64	1.97653	6.68	1.31403	5.31818	0.779888	5.40909	1.43623	4.79167	1.61458	7	1.38313	5.24	1.2	5.36	0.81035	4.24	2.00582	6.72	1.51438	5.36364	0.953463	5.81818	1.43548	5.20833	1.41357	6.95833	1.16018	5.14286	1.40642	5.57143	0.755929	3.92308	2.28989
1021	明艳照人	Look bright and beautiful	positive	6.6729	1.1718	6.1215	1.32259	4.87755	1.70334	7.04082	1.15396	6.62963	1.01491	6.03704	1.40031	4.875	1.51263	6.625	0.923721	6.71698	1.32109	6.20755	1.24589	4.88	1.9	7.44	1.22746	6.78182	1.16573	6.36364	1.07778	5.13043	1.54638	7.08696	1.20276	6.55769	1.17846	5.86538	1.50852	4.65385	1.83177	7	1.13137	6.68966	1.0725	6.48276	1.12188	5.18182	1.4013
1022	鸣冤叫屈	Complain about for justice	negative	3.29787	1.19628	6.7234	1.33028	4.61224	1.92372	6.95918	1.04002	3.3913	1.43777	6.26087	1.48377	5.08333	1.86307	7	1.06322	3.20833	0.931533	7.16667	1.00722	4.16	1.90788	6.92	1.03763	3.375	1.24455	6.83333	1.30773	4.25	1.89393	6.95833	1.12208	3.21739	1.16605	6.6087	1.37309	4.96	1.92527	6.96	0.978093	3.33333	1.49747	6.5	1.50756	4.91667	2.15146
1023	命赴黄泉	People died	negative	2.69565	1.54732	6.47826	1.83472	2.82	1.85923	6.98	1.59706	2.81818	1.81623	6.22727	1.9744	3.15385	2.12964	7.11538	1.10732	2.58333	1.28255	6.70833	1.70623	2.45833	1.47381	6.83333	2.01444	2.5	1.30018	7.04545	1.46311	3.04	2.33595	7.32	1.28193	2.875	1.75233	5.95833	2.01039	2.6	1.22474	6.64	1.823	2.4	1.42984	7.3	1.33749	3.23077	2.86222
1024	命在旦夕	Hold one's life on a precarious tenure	negative	2.5814	1.29528	6.97674	1.55055	3.04082	2.06114	7.32653	1.08758	2.5	1.26303	6.86364	1.67034	3.15385	2.11078	7.03846	1.14824	2.66667	1.35401	7.09524	1.44585	2.91304	2.04302	7.65217	0.934622	2.40909	1.33306	7.09091	1.74326	2.70833	2.01039	7.25	1.25974	2.7619	1.26114	6.85714	1.35225	3.36	2.09921	7.4	0.912871	2.16667	1.11464	7	1.70561	3.07692	2.46514
1025	摸摸索索	Touch the cable	neutral	4.22917	1.07663	5.27083	1.51221	5.5102	1.41602	6.7551	1.40728	3.84	1.21381	5.68	1.14455	5.625	1.40844	6.41667	1.1389	4.65217	0.71406	4.82609	1.74908	5.4	1.44338	7.08	1.57903	3.96	1.05987	5.56	1.41657	5.3913	1.46905	6.86957	1.5755	4.52174	1.03877	4.95652	1.58051	5.61538	1.38786	6.65385	1.26309	3.46154	1.1266	5.84615	1.06819	5.36364	1.85864
1026	模拟考试	Mock exam	neutral	4.69231	0.986087	5.17308	1.33977	3.92	2.07846	7.46	1.19881	5.13462	0.444083	4.90385	0.975376	3.48	1.55778	6.92	1.22202	4.25	1.16946	5.44231	1.58935	4.36	2.44745	8	0.912871	4.52	1.07362	5.34	1.33417	3.54167	1.91059	7.41667	1.44212	4.85185	0.877548	5.01852	1.33869	4.26923	2.20105	7.5	0.948683	5.12	0.331662	5	0.763763	3.25	1.76455
1027	摩天大厦	Skyscraper	neutral	5.85106	1.12247	5.78723	1.66728	4.125	1.64543	6.85417	1.36817	5.82609	1.11405	5.86957	1.5755	4.08333	1.97631	6.5	1.47442	5.875	1.15392	5.70833	1.78104	4.16667	1.27404	7.20833	1.17877	5.8	1	5.56	1.85023	4.13043	1.63219	6.47826	1.67521	5.90909	1.26901	6.04545	1.43019	4.12	1.69115	7.2	0.912871	5.84615	1.14354	5.84615	1.81871	4.33333	2.10339
1028	磨磨蹭蹭	Move slowly	negative	3.08889	0.972864	5.8	1.61808	5.65385	1.88788	7.65385	0.860566	3.42857	0.87014	5.52381	0.813575	5.25	1.95552	7.28571	0.854493	2.79167	0.977093	6.04167	2.07426	6.125	1.72734	8.08333	0.653863	3.13043	1.09977	5.69565	1.79481	5.6	1.87083	7.68	0.988264	3.04545	0.843873	5.90909	1.4445	5.7037	1.93778	7.62963	0.741524	3.54545	0.934199	5.72727	0.467099	5.28571	2.09132
1029	磨破嘴皮	Wear the skin of the mouth	negative	3.84783	0.918148	5.97826	1.27348	5.53191	1.96547	7.12766	1.03456	3.91304	0.733178	5.91304	1.08347	5.52	1.98158	6.96	1.05987	3.78261	1.0853	6.04348	1.46095	5.54545	1.9935	7.31818	0.994574	3.6	0.912871	5.8	1.41421	5.47826	2.10777	7.30435	1.06322	4.14286	0.853564	6.19048	1.07792	5.58333	1.86307	6.95833	0.999094	3.61538	0.767948	6.15385	1.21423	5.92308	1.97744
1030	末梢神经	Peripheral nerve	neutral	4.95349	0.65296	4.09302	1.75681	4.30612	1.99169	7.04082	1.48547	5	0	4.55	1.46808	3.8	1.87083	6.88	1.53623	4.91304	0.900154	3.69565	1.91726	4.83333	2.01444	7.20833	1.444	5.04348	0.208514	3.73913	1.9121	4.08696	2.06514	7.04348	1.69164	4.85	0.933302	4.5	1.50438	4.5	1.94422	7.03846	1.3109	5	0	4.25	1.86474	3.58333	1.97523
[truncated: 1,031 more rows]
[truncated: 60 more columns]
